# Supplementary material for: Heterogeneous levels of delta-like 4 within a multinucleated niche cell maintains muscle stem cell diversity
Source: eLife. 2022 Dec 30;11:e68180. doi: 10.7554/eLife.68180 (PMC9803355; doi:10.7554/eLife.68180)
Supplement: Figure 1—source data 1. [file elife-68180-fig1-data1.xlsx]

## Sheet: WT_Pax7 expression_t0 in sorted
Sample	Pax7.exp
WT	607.68
WT	328.78
WT	438.83
WT	356.63
WT	424.13
WT	227.77
WT	287.66
WT	439.88
WT	213.37
WT	421.04
WT	388.84
WT	284.88
WT	295.66
WT	130.15
WT	295
WT	208.24
WT	137.15
WT	1071.6
WT	487.137
WT	239.677
WT	744.287
WT	512.767
WT	469.327
WT	286.017
WT	101.387
WT	330.357
WT	292.927
WT	224.067
WT	384.817
WT	487.977
WT	131.257
WT	300.517
WT	280.347
WT	472.967
WT	199.517
WT	184.087
WT	297.387
WT	358.097
WT	317.777
WT	322.457
WT	173.967
WT	151.557
WT	252.767
WT	198.687
WT	63.987
WT	435.337
WT	438.787
WT	378.207
WT	400.377
WT	267.383
WT	400.303
WT	162.643
WT	369.577
WT	463.487
WT	303.657
WT	633.19
WT	630.64
WT	414.06
WT	410.23
WT	181.94
WT	309.47
WT	199.46
WT	168.14
WT	595.02
WT	421.71
WT	286.98
WT	442.95
WT	541.31
WT	637.14
WT	253.33
WT	256.51
WT	432.89
WT	298.77
WT	418.95
WT	284.12
WT	320.56
WT	475.82
WT	324.88
WT	482.92
WT	547
WT	206.89
WT	233.8
WT	549.843
WT	640.993
WT	556.663
WT	324.343
WT	220.393
WT	241.443
WT	299.283
WT	239.4
WT	151.73
WT	544.31
WT	632.88
WT	385.26
WT	336.53
WT	747.66
WT	500.31
WT	361.44
WT	151.31
WT	140.95
WT	382.537
WT	581.177
WT	516.297
WT	334.797
WT	134.437
WT	245.367
WT	424.827
WT	139.637
WT	271.097
WT	106.207
WT	682.377
WT	432.777
WT	188.387
WT	563.13
WT	727.96
WT	169.13
WT	212.87
WT	287.473
WT	276.253
WT	286.243
WT	107.393
WT	353.277
WT	292.257
WT	268.007
WT	566.407
WT	155.807
WT	358.357
WT	464.66
WT	294.47
WT	582.143
WT	399.303
WT	627.253
WT	661.733
WT	351.423
WT	208.813
WT	126.183
WT	82.093
WT	113.933
WT	306.317
WT	234.767
WT	326.787
WT	235.877
WT	125.167
WT	313.497
WT	236.097
WT	253.857
WT	359.817
WT	158.067
WT	524.597
WT	343.387
WT	116.297
WT	455.273
WT	301.793
WT	250.793
WT	94.663
WT	284.083
WT	55.807
WT	498.107
WT	199.727
WT	201.887
WT	82.497
WT	194.927
WT	539.997
WT	285.397
WT	388.797
WT	285.043
WT	207.013
WT	409.273
WT	513.583
WT	247.543
WT	197.343
WT	168.783
WT	152.413
WT	77.263
WT	280.193
WT	225.073
WT	532.443
WT	169.743
WT	297.223
WT	299.173
WT	212.223
WT	262.767
WT	293.537
WT	457.237
WT	195.367
WT	128.937
WT	417.247
WT	348.317
WT	178.077
WT	216.347
WT	116.257
WT	125.747
WT	148.057
WT	168.007
WT	30.8
WT	262.64
WT	308.69
WT	97.41
WT	125.5
WT	443.107
WT	447.087
WT	447.627
WT	148.297
WT	119.347
WT	256.583
WT	512.233
WT	150.013
WT	203.233
WT	129.233
WT	319.763
WT	327.98
WT	372.48
WT	362.61
WT	258.53
WT	203.78
WT	435.18
WT	211.51
WT	205.64
WT	50.49
WT	341.95
WT	125.26
WT	72.48
WT	258.817
WT	586.427
WT	287.467
WT	401.687
WT	644.937
WT	425.107
WT	50.177
WT	158.347
WT	222.937
WT	410.377
WT	260.877
WT	77.387
WT	123.837
WT	142.177
WT	635.057
WT	219.187
WT	379.737
WT	362.787
WT	461.687
WT	506.777
WT	443.227
WT	422.667
WT	405.697
WT	444.637
WT	311.977
WT	254.397
WT	278.517
WT	383.377
WT	390.207
WT	161.917
WT	223.917
WT	316.897
WT	345.117
WT	318.077
WT	331.987
WT	260.347
WT	271.377
WT	297.437
WT	643.857
WT	313.447
WT	208.057
WT	215.227
WT	132.397
WT	222.067
WT	635.68
WT	246.89
WT	308.35
WT	383.62
WT	269.41
WT	392.58
WT	770.16
WT	129.54
WT	299.2
WT	159.75
WT	218.18
WT	107.18
WT	193.57
