# Supplementary material for: Heterogeneous levels of delta-like 4 within a multinucleated niche cell maintains muscle stem cell diversity
Source: eLife. 2022 Dec 30;11:e68180. doi: 10.7554/eLife.68180 (PMC9803355; doi:10.7554/eLife.68180)
Supplement: Figure 1—source data 2. [file elife-68180-fig1-data2.xlsx]

## Sheet: WT_Ddx6 expression in SC_t0 in 
Sample	ddx6.exp
WT	476.08
WT	292.443
WT	244.962
WT	0
WT	162.447
WT	324.831
WT	95.392
WT	307.071
WT	188.417
WT	391.917
WT	330.291
WT	390.815
WT	268.55
WT	56.732
WT	199.809
WT	278.984
WT	249.354
WT	246.724
WT	389.37
WT	401.869
WT	232.092
WT	137.925
WT	121.813
WT	279.23
WT	265.864
WT	310.898
WT	95.768
WT	66.526
WT	216.124
WT	387.717
WT	254.483
WT	204.396
WT	123.895
WT	200.142
WT	29.358
WT	174.512
WT	0
WT	23.623
WT	206.936
WT	41.167
WT	227.098
WT	0
WT	170.675
WT	173.188
WT	723.495
WT	237.2
WT	0
WT	50.185
WT	0
WT	257.759
WT	0
WT	340.749
WT	179.147
WT	245.034
WT	156.402
WT	0
WT	259.379
WT	0
WT	275.331
WT	414.104
WT	404.596
WT	375.067
WT	506.257
WT	329.773
WT	734.617
WT	61.066
WT	256.776
WT	291.09
WT	288.093
WT	86.685
WT	428.353
WT	712.848
WT	360.449
WT	216.922
WT	411.312
WT	295.246
WT	372.322
WT	224.039
WT	587.811
WT	0
WT	357.601
WT	159.126
WT	395.554
WT	0
WT	518.63
WT	228.063
WT	178.876
WT	151.432
WT	94.579
WT	492.025
WT	236.218
WT	110.904
WT	303.247
WT	268.226
WT	705.905
WT	434.814
WT	448.06
WT	137.854
WT	0
WT	267.865
WT	197.484
WT	194.148
WT	175.345
WT	328.197
WT	342.699
WT	161.912
WT	362.813
WT	77.624
WT	361.158
WT	285.346
WT	158.175
WT	27.884
WT	176.574
WT	176.541
WT	0
WT	416.996
WT	0
WT	406.4
WT	253.31
WT	264.175
WT	0.636
WT	35.107
WT	323.819
WT	440.098
WT	709.528
WT	390.095
WT	135.263
WT	539.076
WT	335.635
WT	486.158
WT	257.469
WT	145.587
WT	622.177
WT	280.369
WT	392
WT	344.973
WT	338.577
WT	537.162
WT	214.496
WT	405.296
WT	484.933
WT	267.733
WT	144.972
WT	346.369
WT	319.349
WT	342.93
WT	263.048
WT	100.038
WT	641.078
WT	101.294
WT	197.599
WT	355.549
WT	268.984
WT	645.401
WT	750.545
WT	426.472
WT	155.861
WT	274.579
WT	347.36
WT	256.581
WT	629.229
WT	116.359
WT	386.913
WT	252.822
WT	359.75
WT	0
WT	298.647
WT	154.95
WT	508.204
WT	135.929
WT	0
WT	150.11
WT	187.355
WT	176.904
WT	0
WT	50.619
WT	296.661
WT	93.036
WT	485.926
WT	251.457
WT	72.056
WT	37.112
WT	0
WT	775.287
WT	113.182
WT	74.479
WT	277.863
WT	523.481
WT	275.433
WT	403.917
WT	436.75
WT	257.801
WT	393.49
WT	171.185
WT	440.565
WT	247.381
WT	92.582
WT	218.412
WT	396.573
WT	55.453
WT	250.952
WT	457.482
WT	291.34
WT	323.239
WT	60.768
WT	327.071
WT	570.202
WT	539.31
WT	384.568
WT	493.686
WT	132.02
WT	144.516
WT	275.385
WT	46.1
