# Supplementary material for: Heterogeneous levels of delta-like 4 within a multinucleated niche cell maintains muscle stem cell diversity
Source: eLife. 2022 Dec 30;11:e68180. doi: 10.7554/eLife.68180 (PMC9803355; doi:10.7554/eLife.68180)
Supplement: Figure 1—source data 3. [file elife-68180-fig1-data3.xlsx]

## Sheet: mouse1
Item	Source	Pax7 (red) Intensity	Red channel background	Pax7 mean intensity	Corrected minus to zeros			Ddx6 (green) Intensity	Green channel background	Ddx6 mean intensity	Corrected minus to zeros
1	mouse1_pax7_ddx6_030.nd2	575.54	394.02	181.52	181.52			556.71	355.09	201.62	201.62
2	mouse1_pax7_ddx6_029.nd2	659.05	365.5	293.55	293.55			536.06	327.53	208.53	208.53
3	mouse1_pax7_ddx6_028.nd2	807.86	490.38	317.48	317.48			554.8	468.78	86.02	86.02
4	mouse1_pax7_ddx6_027.nd2	627.47	384.74	242.73	242.73			448.33	259.39	188.94	188.94
5	mouse1_pax7_ddx6_026.nd2	1173.03	612.45	560.58	560.58			531.31	375.86	155.45	155.45
6	mouse1_pax7_ddx6_025.nd2	1052.92	454.97	597.95	597.95			509.07	305.96	203.11	203.11
7	mouse1_pax7_ddx6_024.nd2	837.78	471.29	366.49	366.49			628.91	347.57	281.34	281.34
8	mouse1_pax7_ddx6_023.nd2	706.77	515.88	190.89	190.89			665.36	479.68	185.68	185.68
9	mouse1_pax7_ddx6_022.nd2	640.87	407.11	233.76	233.76			420.83	343.88	76.95	76.95
10	mouse1_pax7_ddx6_021.nd2	1143.31	747.51	395.8	395.8			810.4	562.49	247.91	247.91
11	mouse1_pax7_ddx6_020.nd2	1008.04	825.55	182.49	182.49			821.52	706.29	115.23	115.23
12	mouse1_pax7_ddx6_019.nd2	1315.59	756.46	559.13	559.13			1109.44	747.6	361.84	361.84
13	mouse1_pax7_ddx6_018.nd2	580.11	507.21	72.9	72.9			614.28	554.73	59.55	59.55
14	mouse1_pax7_ddx6_017.nd2	1175.35	544.97	630.38	630.38			904.29	525.96	378.33	378.33
15	mouse1_pax7_ddx6_016.nd2	1019.56	621.48	398.08	398.08			709.84	588.78	121.06	121.06
16	mouse1_pax7_ddx6_015.nd2	681.63	595.11	86.52	86.52			624.92	592.57	32.35	32.35
17	mouse1_pax7_ddx6_014.nd2	1026.08	519.04	507.04	507.04			682.79	463.26	219.53	219.53
18	mouse1_pax7_ddx6_013.nd2	1259.82	656.9	602.92	602.92			1015.94	644.71	371.23	371.23
19	mouse1_pax7_ddx6_013.nd2	1174.17	693.21	480.96	480.96			894.99	655.45	239.54	239.54
20	mouse1_pax7_ddx6_012.nd2	712.96	382.12	330.84	330.84			548.32	334.2	214.12	214.12
21	mouse1_pax7_ddx6_011.nd2	678.78	429.86	248.92	248.92			657.65	373.47	284.18	284.18
22	mouse1_pax7_ddx6_010.nd2	590.22	391.79	198.43	198.43			519.02	362.4	156.62	156.62
23	mouse1_pax7_ddx6_009.nd2	692.53	390.51	302.02	302.02			473.92	323.23	150.69	150.69
24	mouse1_pax7_ddx6_008.nd2	1069.51	515.76	553.75	553.75			548.17	382.59	165.58	165.58
25	mouse1_pax7_ddx6_007.nd2	663.34	400.33	263.01	263.01			705.78	425.49	280.29	280.29
26	mouse1_pax7_ddx6_006.nd2	993.37	496.17	497.2	497.2			725.45	447.92	277.53	277.53
27	mouse1_pax7_ddx6_005.nd2	743.01	483.88	259.13	259.13			689.1	387.76	301.34	301.34
28	mouse1_pax7_ddx6_004.nd2	923.73	485.06	438.67	438.67			846.06	494.46	351.6	351.6
29	mouse1_pax7_ddx6_003.nd2	1378.83	1029.43	349.4	349.4			1017.19	824.18	193.01	193.01
30	mouse1_pax7_ddx6_002.nd2	684.23	502.23	182	182			560.62	397.36	163.26	163.26
31	mouse1_pax7_ddx6_001.nd2	1082.96	712.27	370.69	370.69			1179.32	1071.98	107.34	107.34
32	mouse1_pax7_ddx6_060.nd2	1181.49	709.89	471.6	471.6			809.97	555.21	254.76	254.76
33	mouse1_pax7_ddx6_059.nd2	952.05	571.2	380.85	380.85			579	464.18	114.82	114.82
34	mouse1_pax7_ddx6_058.nd2	757.41	546.13	211.28	211.28			562.14	496.75	65.39	65.39
35	mouse1_pax7_ddx6_057.nd2	998.09	490.1	507.99	507.99			699.58	344.55	355.03	355.03
36	mouse1_pax7_ddx6_056.nd2	735.27	413.22	322.05	322.05			590.67	337.84	252.83	252.83
37	mouse1_pax7_ddx6_055.nd2	966.92	441.89	525.03	525.03			929.77	425.25	504.52	504.52
38	mouse1_pax7_ddx6_054.nd2	583.38	340	243.38	243.38			697.39	347.26	350.13	350.13
39	mouse1_pax7_ddx6_053.nd2	1238.61	826.96	411.65	411.65			870.91	643.64	227.27	227.27
40	mouse1_pax7_ddx6_052.nd2	948.37	379.46	568.91	568.91			631.58	349.06	282.52	282.52
41	mouse1_pax7_ddx6_050.nd2	1037.1	455.07	582.03	582.03			807.63	435.39	372.24	372.24
42	mouse1_pax7_ddx6_049.nd2	925.83	401.69	524.14	524.14			604.72	366.51	238.21	238.21
43	mouse1_pax7_ddx6_048.nd2	648.34	421.97	226.37	226.37			562.58	435.32	127.26	127.26
44	mouse1_pax7_ddx6_047.nd2	1064.42	707.44	356.98	356.98			802.21	584.26	217.95	217.95
45	mouse1_pax7_ddx6_046.nd2	1295.38	406.79	888.59	888.59			947.61	424.96	522.65	522.65
46	mouse1_pax7_ddx6_046.nd2	1013.56	429.51	584.05	584.05			967.75	390.39	577.36	577.36
47	mouse1_pax7_ddx6_045.nd2	1032.29	588.65	443.64	443.64			636.57	451.36	185.21	185.21
48	mouse1_pax7_ddx6_044.nd2	1079.36	552.02	527.34	527.34			727.35	449.45	277.9	277.9
49	mouse1_pax7_ddx6_043.nd2	773.75	343.65	430.1	430.1			537.32	323.44	213.88	213.88
50	mouse1_pax7_ddx6_042.nd2	544.01	425.13	118.88	118.88			443.04	343.45	99.59	99.59
51	mouse1_pax7_ddx6_041.nd2	1237.36	726.61	510.75	510.75			908.13	598.02	310.11	310.11
52	mouse1_pax7_ddx6_040.nd2	802.84	710.24	92.6	92.6			613.73	502.39	111.34	111.34
53	mouse1_pax7_ddx6_039.nd2	1083.08	704.58	378.5	378.5			716.97	548.73	168.24	168.24
54	mouse1_pax7_ddx6_038.nd2	861.79	561.92	299.87	299.87			698.45	503.84	194.61	194.61
55	mouse1_pax7_ddx6_037.nd2	945.54	450.62	494.92	494.92			657.76	361.61	296.15	296.15
56	mouse1_pax7_ddx6_037.nd2	618.31	343.1	275.21	275.21			443.96	270.98	172.98	172.98
57	mouse1_pax7_ddx6_036.nd2	572.12	327.82	244.3	244.3			501.86	273.63	228.23	228.23
58	mouse1_pax7_ddx6_035.nd2	617.63	335.92	281.71	281.71			679.82	274.39	405.43	405.43
59	mouse1_pax7_ddx6_034.nd2	734.31	389.64	344.67	344.67			467.98	366.61	101.37	101.37
60	mouse1_pax7_ddx6_033.nd2	1358.36	450.64	907.72	907.72			953.73	381.11	572.62	572.62
61	mouse1_pax7_ddx6_032.nd2	1248.53	670.56	577.97	577.97			762.2	406.77	355.43	355.43
62	mouse1_pax7_ddx6_031.nd2	705.34	379.11	326.23	326.23			547.81	377.72	170.09	170.09
63	mouse1_pax7_ddx6_076.nd2	735.8	446.81	288.99	288.99			532.79	369.39	163.4	163.4
64	mouse1_pax7_ddx6_074.nd2	1256.37	553.21	703.16	703.16			832.94	523.79	309.15	309.15
65	mouse1_pax7_ddx6_073.nd2	813.64	570.34	243.3	243.3			532.65	480.17	52.48	52.48
66	mouse1_pax7_ddx6_072.nd2	870.01	527.5	342.51	342.51			734.67	524.72	209.95	209.95
67	mouse1_pax7_ddx6_071.nd2	811.41	537.25	274.16	274.16			787.42	602.96	184.46	184.46
68	mouse1_pax7_ddx6_070.nd2	1062.29	647.19	415.1	415.1			1056.88	678.24	378.64	378.64
69	mouse1_pax7_ddx6_068.nd2	801.05	537.22	263.83	263.83			730.98	548.45	182.53	182.53
70	mouse1_pax7_ddx6_067.nd2	601.52	402.37	199.15	199.15			636.97	439.82	197.15	197.15
71	mouse1_pax7_ddx6_066.nd2	1044.48	707.25	337.23	337.23			906.09	715.42	190.67	190.67
72	mouse1_pax7_ddx6_065.nd2	1216.45	787.44	429.01	429.01			817.41	659.57	157.84	157.84
73	mouse1_pax7_ddx6_064.nd2	1015.12	654.17	360.95	360.95			809.97	600.73	209.24	209.24
74	mouse1_pax7_ddx6_063.nd2	977.29	692.48	284.81	284.81			829.08	608.63	220.45	220.45
75	mouse1_pax7_ddx6_062.nd2	803.96	647.65	156.31	156.31			594.65	599.21	-4.56	0
76	mouse1_pax7_ddx6_061.nd2	747.25	519.79	227.46	227.46			542.69	444.02	98.67	98.67

## Sheet: mouse2
Item	Source	Pax7 (red) Intensity	Red channel background	Pax7 mean intensity	Corrected minus to zeros			Ddx6 (green) Intensity	Green channel background	Ddx6 mean intensity	Corrected minus to zeros
1	mouse2_pax7_ddx6_030.nd2	879.71	395.87	483.84	483.84			684.47	394.17	290.3	290.3
2	mouse2_pax7_ddx6_029.nd2	643.95	416.45	227.5	227.5			653.84	384.75	269.09	269.09
3	mouse2_pax7_ddx6_028.nd2	1096.63	423.66	672.97	672.97			804.19	374.77	429.42	429.42
4	mouse2_pax7_ddx6_027.nd2	626.02	410.54	215.48	215.48			553.82	341.74	212.08	212.08
5	mouse2_pax7_ddx6_026.nd2	615.25	441.64	173.61	173.61			516.84	447.01	69.83	69.83
6	mouse2_pax7_ddx6_025.nd2	645.99	425.03	220.96	220.96			725.21	445.04	280.17	280.17
7	mouse2_pax7_ddx6_024.nd2	645.85	434.57	211.28	211.28			686.35	399.26	287.09	287.09
8	mouse2_pax7_ddx6_023.nd2	461.69	380.27	81.42	81.42			566.81	385.76	181.05	181.05
9	mouse2_pax7_ddx6_022.nd2	736	405.29	330.71	330.71			722.81	379.04	343.77	343.77
10	mouse2_pax7_ddx6_021.nd2	739.48	410.97	328.51	328.51			792.13	375.43	416.7	416.7
11	mouse2_pax7_ddx6_020.nd2	676.83	455.23	221.6	221.6			621.03	385.44	235.59	235.59
12	mouse2_pax7_ddx6_019.nd2	725.1	454.14	270.96	270.96			649.65	373.53	276.12	276.12
13	mouse2_pax7_ddx6_018.nd2	707.48	481.88	225.6	225.6			604.81	376.81	228	228
14	mouse2_pax7_ddx6_017.nd2	1116.85	804.59	312.26	312.26			684.36	434.96	249.4	249.4
15	mouse2_pax7_ddx6_017.nd2	1118.62	812.78	305.84	305.84			467.43	342.06	125.37	125.37
16	mouse2_pax7_ddx6_015.nd2	1130	709.91	420.09	420.09			914.3	569.16	345.14	345.14
17	mouse2_pax7_ddx6_014.nd2	802.52	417.82	384.7	384.7			582.15	399.38	182.77	182.77
18	mouse2_pax7_ddx6_013.nd2	690.09	344.54	345.55	345.55			699.37	409.16	290.21	290.21
19	mouse2_pax7_ddx6_012.nd2	992.57	532.72	459.85	459.85			809.91	455.39	354.52	354.52
20	mouse2_pax7_ddx6_011.nd2	1052.1	739.38	312.72	312.72			992.46	759.09	233.37	233.37
21	mouse2_pax7_ddx6_010.nd2	1021.34	520.82	500.52	500.52			901.42	478.93	422.49	422.49
22	mouse2_pax7_ddx6_009.nd2	1000.38	686.31	314.07	314.07			832.31	616.22	216.09	216.09
23	mouse2_pax7_ddx6_008.nd2	648.82	555.57	93.25	93.25			544.83	516.12	28.71	28.71
24	mouse2_pax7_ddx6_007.nd2	1236.43	691.61	544.82	544.82			1094.91	660.59	434.32	434.32
25	mouse2_pax7_ddx6_006.nd2	894.55	583.57	310.98	310.98			1054.28	633.82	420.46	420.46
26	mouse2_pax7_ddx6_005.nd2	722.15	542.74	179.41	179.41			706.27	519.78	186.49	186.49
27	mouse2_pax7_ddx6_004.nd2	841.33	469.08	372.25	372.25			782.31	478.45	303.86	303.86
28	mouse2_pax7_ddx6_004.nd2	505.44	341.01	164.43	164.43			535	345.85	189.15	189.15
29	mouse2_pax7_ddx6_003.nd2	928.36	512.4	415.96	415.96			978.35	522.42	455.93	455.93
30	mouse2_pax7_ddx6_003.nd2	643.69	341.63	302.06	302.06			551.91	318.49	233.42	233.42
31	mouse2_pax7_ddx6_002.nd2	920.88	413.88	507	507			760.29	402.71	357.58	357.58
32	mouse2_pax7_ddx6_001.nd2	1004.38	695.81	308.57	308.57			1122.73	759.14	363.59	363.59
33	mouse2_pax7_ddx6_056.nd2	670.12	311.35	358.77	358.77			591.07	288.67	302.4	302.4
34	mouse2_pax7_ddx6_055.nd2	747.84	310.32	437.52	437.52			797.01	318.42	478.59	478.59
35	mouse2_pax7_ddx6_054.nd2	731.89	401.45	330.44	330.44			621.17	342.3	278.87	278.87
36	mouse2_pax7_ddx6_053.nd2	706.96	479.9	227.06	227.06			564.06	385.18	178.88	178.88
37	mouse2_pax7_ddx6_052.nd2	954.65	515.23	439.42	439.42			638.51	461.43	177.08	177.08
38	mouse2_pax7_ddx6_051.nd2	623.6	381.1	242.5	242.5			551.3	362.05	189.25	189.25
39	mouse2_pax7_ddx6_050.nd2	680.7	425.21	255.49	255.49			608.3	322.67	285.63	285.63
40	mouse2_pax7_ddx6_049.nd2	852.67	460.1	392.57	392.57			633.54	348.12	285.42	285.42
41	mouse2_pax7_ddx6_048.nd2	631.1	326.59	304.51	304.51			617.85	333.01	284.84	284.84
42	mouse2_pax7_ddx6_047.nd2	715.11	362.7	352.41	352.41			714.85	353.33	361.52	361.52
43	mouse2_pax7_ddx6_046.nd2	613.61	395.99	217.62	217.62			563.39	312.35	251.04	251.04
44	mouse2_pax7_ddx6_045.nd2	672.93	362.02	310.91	310.91			515.67	252.6	263.07	263.07
45	mouse2_pax7_ddx6_044.nd2	660.74	455.75	204.99	204.99			560.34	399.86	160.48	160.48
46	mouse2_pax7_ddx6_043.nd2	759.28	432.94	326.34	326.34			675.41	408.1	267.31	267.31
47	mouse2_pax7_ddx6_042.nd2	706.96	363.43	343.53	343.53			512.68	225.42	287.26	287.26
48	mouse2_pax7_ddx6_042.nd2	808.49	395.6	412.89	412.89			572.77	250.13	322.64	322.64
49	mouse2_pax7_ddx6_042.nd2	866.95	536.05	330.9	330.9			786.57	532.91	253.66	253.66
50	mouse2_pax7_ddx6_041.nd2	689.82	308.62	381.2	381.2			594.81	273.11	321.7	321.7
51	mouse2_pax7_ddx6_040.nd2	801.58	587.88	213.7	213.7			794.61	492.17	302.44	302.44
52	mouse2_pax7_ddx6_039.nd2	1005.23	552.35	452.88	452.88			779.29	439.84	339.45	339.45
53	mouse2_pax7_ddx6_038.nd2	768.46	571.2	197.26	197.26			629.77	360.72	269.05	269.05
54	mouse2_pax7_ddx6_037.nd2	1117.33	552.6	564.73	564.73			765.66	511.24	254.42	254.42
55	mouse2_pax7_ddx6_036.nd2	803.15	418.53	384.62	384.62			679.53	400.41	279.12	279.12
56	mouse2_pax7_ddx6_035.nd2	1129.13	397.17	731.96	731.96			717.61	376.01	341.6	341.6
57	mouse2_pax7_ddx6_034.nd2	633.97	308.51	325.46	325.46			543.57	327.52	216.05	216.05
58	mouse2_pax7_ddx6_033.nd2	1088.18	457.49	630.69	630.69			970.9	421.66	549.24	549.24
59	mouse2_pax7_ddx6_032.nd2	571.96	390.16	181.8	181.8			463.88	318.93	144.95	144.95
60	mouse2_pax7_ddx6_031.nd2	802.14	416.9	385.24	385.24			708.28	363.35	344.93	344.93
