# Supplementary material for: Heterogeneous levels of delta-like 4 within a multinucleated niche cell maintains muscle stem cell diversity
Source: eLife. 2022 Dec 30;11:e68180. doi: 10.7554/eLife.68180 (PMC9803355; doi:10.7554/eLife.68180)
Supplement: Figure 1—source data 4. [file elife-68180-fig1-data4.xlsx]

## Sheet: Ctrl 4
Item	Source	Cy5 (Pax7) mean intensity	Cy5 channel background	Cy5 mean minus background	Pax7 mean intensity		GFP (Notch) mean intensity	GFP channel background	GFP mean minus background	Notch reporter mean intensity
1	C4 T0__Pax7_Dll4_GFP 001.nd2	978.33	380.08	598.25	598.25		2720.83	1917.11	803.72	803.72
2	C4 T0__Pax7_Dll4_GFP 001.nd2	442.51	308.71	133.8	133.8		1520.36	1771.93	-251.57	0
3	C4 T0__Pax7_Dll4_GFP 002.nd2	488.96	291.4	197.56	197.56		1740.18	1321.63	418.55	418.55
4	C4 T0__Pax7_Dll4_GFP 003.nd2	470.76	310.61	160.15	160.15		1776.88	1607.85	169.03	169.03
5	C4 T0__Pax7_Dll4_GFP 004.nd2	488.18	322.09	166.09	166.09		1511.62	1835.16	-323.54	0
6	C4 T0__Pax7_Dll4_GFP 005.nd2	420.42	331.1	89.32	89.32		1799.3	1790.57	8.73	8.73
7	C4 T0__Pax7_Dll4_GFP 006.nd2	916.02	376.37	539.65	539.65		2841.91	1928.69	913.22	913.22
8	C4 T0__Pax7_Dll4_GFP 007.nd2	557.33	350.66	206.67	206.67		1571.14	1773.58	-202.44	0
9	C4 T0__Pax7_Dll4_GFP 008.nd2	507.91	322.14	185.77	185.77		1999.67	1920.3	79.37	79.37
10	C4 T0__Pax7_Dll4_GFP 009.nd2	652.82	321.79	331.03	331.03		1207.76	1056.42	151.34	151.34
11	C4 T0__Pax7_Dll4_GFP 010.nd2	558.26	320.86	237.4	237.4		1179.41	1070.64	108.77	108.77
12	C4 T0__Pax7_Dll4_GFP 011.nd2	435.65	322.47	113.18	113.18		1440.26	1212.57	227.69	227.69
13	C4 T0__Pax7_Dll4_GFP 012.nd2	522.86	293.49	229.37	229.37		1294.9	979.38	315.52	315.52
14	C4 T0__Pax7_Dll4_GFP 013.nd2	431.83	303.76	128.07	128.07		1299.24	986.43	312.81	312.81
15	C4 T0__Pax7_Dll4_GFP 013.nd2	402.73	318.63	84.1	84.1		1026.61	1302.86	-276.25	0
16	C4 T0__Pax7_Dll4_GFP 014.nd2	576.91	365.05	211.86	211.86		1359.69	1640.37	-280.68	0
17	C4 T0__Pax7_Dll4_GFP 015.nd2	595.4	348.5	246.9	246.9		1100.84	1108.54	-7.7	0
18	C4 T0__Pax7_Dll4_GFP 016.nd2	594.4	277.75	316.65	316.65		1409.09	1248.48	160.61	160.61
19	C4 T0__Pax7_Dll4_GFP 017.nd2	593.22	381.32	211.9	211.9		1405.82	1371.41	34.41	34.41
20	C4 T0__Pax7_Dll4_GFP 018.nd2	503.23	380.87	122.36	122.36		1881.89	1685.73	196.16	196.16
21	C4 T0__Pax7_Dll4_GFP 019.nd2	614.41	323.71	290.7	290.7		1550.15	1218.46	331.69	331.69
22	C4 T0__Pax7_Dll4_GFP 020.nd2	531.45	357.12	174.33	174.33		1860.34	1346.24	514.1	514.1
23	C4 T0__Pax7_Dll4_GFP 021.nd2	442.02	277.87	164.15	164.15		1098.5	1040.64	57.86	57.86
24	C4 T0__Pax7_Dll4_GFP 022.nd2	536.44	383.96	152.48	152.48		1596.34	1512.29	84.05	84.05
25	C4 T0__Pax7_Dll4_GFP 023.nd2	552.93	403.53	149.4	149.4		1558.41	1435.67	122.74	122.74
26	C4 T0__Pax7_Dll4_GFP 024.nd2	600.84	345.14	255.7	255.7		1309.45	803.94	505.51	505.51
27	C4 T0__Pax7_Dll4_GFP 025.nd2	612.08	315.96	296.12	296.12		1766.25	1299.4	466.85	466.85
28	C4 T0__Pax7_Dll4_GFP 026.nd2	573.64	370.46	203.18	203.18		2562.96	2263.28	299.68	299.68
29	C4 T0__Pax7_Dll4_GFP 028.nd2	869.47	477.97	391.5	391.5		1913	1478.29	434.71	434.71
30	C4 T0__Pax7_Dll4_GFP 029.nd2	669.52	430.93	238.59	238.59		1628.69	1494.12	134.57	134.57
31	C4 T0__Pax7_Dll4_GFP 030.nd2	724.37	364.69	359.68	359.68		1970.26	1612.63	357.63	357.63
32	C4 T0__Pax7_Dll4_GFP 031.nd2	386.33	278.97	107.36	107.36		1499.85	1246.66	253.19	253.19
33	C4 T0__Pax7_Dll4_GFP 032.nd2	477.71	320.95	156.76	156.76		1402.19	1184.02	218.17	218.17
34	C4 T0__Pax7_Dll4_GFP 032.nd2	490.2	374.63	115.57	115.57		1376.23	1260.16	116.07	116.07
35	C4 T0__Pax7_Dll4_GFP 033.nd2	433.65	293.86	139.79	139.79		1286.75	1059.18	227.57	227.57
36	C4 T0__Pax7_Dll4_GFP 035.nd2	760.58	362.31	398.27	398.27		1903.59	1492.97	410.62	410.62
37	C4 T0__Pax7_Dll4_GFP 036.nd2	806.3	424.85	381.45	381.45		1842.45	1390.94	451.51	451.51
38	C4 T0__Pax7_Dll4_GFP 037.nd2	863.7	364.44	499.26	499.26		2100.47	1281.18	819.29	819.29
39	C4 T0__Pax7_Dll4_GFP 039.nd2	457	261.81	195.19	195.19		712.14	999.93	-287.79	0
40	C4 T0__Pax7_Dll4_GFP 040.nd2	410.41	309	101.41	101.41		1529.08	1446.53	82.55	82.55
41	C4 T0__Pax7_Dll4_GFP 041.nd2	982.96	412.66	570.3	570.3		3355.09	2313.31	1041.78	1041.78
42	C4 T0__Pax7_Dll4_GFP 042.nd2	1118.81	520.97	597.84	597.84		3466.04	2091.37	1374.67	1374.67
43	C4 T0__Pax7_Dll4_GFP 043.nd2	979.05	450.43	528.62	528.62		2737.35	1624.89	1112.46	1112.46
44	C4 T0__Pax7_Dll4_GFP 044.nd2	676.49	318.94	357.55	357.55		1594.86	1465.38	129.48	129.48
45	C4 T0__Pax7_Dll4_GFP 045.nd2	541.02	380.44	160.58	160.58		1267.45	1368.79	-101.34	0
46	C4 T0__Pax7_Dll4_GFP 046.nd2	510.86	326.82	184.04	184.04		1634.86	1475.93	158.93	158.93
47	C4 T0__Pax7_Dll4_GFP 047.nd2	408.64	287.77	120.87	120.87		1361.8	1384.01	-22.21	0
48	C4 T0__Pax7_Dll4_GFP 048.nd2	544.25	304.17	240.08	240.08		1239.92	1039.48	200.44	200.44
49	C4 T0__Pax7_Dll4_GFP 049.nd2	604.51	373.77	230.74	230.74		1714.4	1495.48	218.92	218.92
50	C4 T0__Pax7_Dll4_GFP 050.nd2	552.02	375.61	176.41	176.41		1551.88	1485.17	66.71	66.71
51	C4 T0__Pax7_Dll4_GFP 051.nd2	613.6	327.81	285.79	285.79		1451.67	1139.19	312.48	312.48
52	C4 T0__Pax7_Dll4_GFP 052.nd2	666.74	349.17	317.57	317.57		1362.03	1175.28	186.75	186.75
53	C4 T0__Pax7_Dll4_GFP 053.nd2	683.14	270.2	412.94	412.94		1817.82	928.93	888.89	888.89
54	C4 T0__Pax7_Dll4_GFP 054.nd2	784.04	284.83	499.21	499.21		1809.57	1004.67	804.9	804.9
55	C4 T0__Pax7_Dll4_GFP 055.nd2	535.57	389.32	146.25	146.25		2304.53	2013.5	291.03	291.03
56	C4 T0__Pax7_Dll4_GFP 056.nd2	500.96	369.09	131.87	131.87		1790.64	1544.51	246.13	246.13
57	C4 T0__Pax7_Dll4_GFP 057.nd2	565.83	322.75	243.08	243.08		2277.31	2051.75	225.56	225.56
58	C4 T0__Pax7_Dll4_GFP 057.nd2	563.49	377.81	185.68	185.68		1938.45	1937.35	1.1	1.1
59	C4 T0__Pax7_Dll4_GFP 058.nd2	396.75	270.21	126.54	126.54		1681.85	1322.19	359.66	359.66
60	C4 T0__Pax7_Dll4_GFP 059.nd2	742.54	489.53	253.01	253.01		2592.02	2359.02	233	233
61	C4 T0__Pax7_Dll4_GFP 060.nd2	727.07	440.18	286.89	286.89		2644.17	2219.29	424.88	424.88
62	C4 T0__Pax7_Dll4_GFP 061.nd2	602.74	408.06	194.68	194.68		1934.89	1845.39	89.5	89.5
63	C4 T0__Pax7_Dll4_GFP 062.nd2	643.73	549.94	93.79	93.79		3037.04	3222.04	-185	0
64	C4 T0__Pax7_Dll4_GFP 063.nd2	446.82	254.06	192.76	192.76		1354.76	1155.16	199.6	199.6
65	C4 T0__Pax7_Dll4_GFP 064.nd2	755.48	317.97	437.51	437.51		2072.61	1532.99	539.62	539.62
66	C4 T0__Pax7_Dll4_GFP 065.nd2	683.92	418.99	264.93	264.93		1790.57	1471.92	318.65	318.65
67	C4 T0__Pax7_Dll4_GFP 068.nd2	778.16	470.95	307.21	307.21		1476.06	1416.85	59.21	59.21
68	C4 T0__Pax7_Dll4_GFP 069.nd2	674.29	500.76	173.53	173.53		1821.22	1369.42	451.8	451.8
69	C4 T0__Pax7_Dll4_GFP 069.nd2	691.73	500.73	191	191		1859.61	1380.51	479.1	479.1
70	C4 T0__Pax7_Dll4_GFP 070.nd2	622.47	310.16	312.31	312.31		1189.45	1048.45	141	141
71	C4 T0__Pax7_Dll4_GFP 070.nd2	638.01	327.12	310.89	310.89		1186.29	1050.27	136.02	136.02
72	C4 T0__Pax7_Dll4_GFP 071.nd2	362.07	246.12	115.95	115.95		1094.94	947.31	147.63	147.63
73	C4 T0__Pax7_Dll4_GFP 071.nd2	393.45	281.44	112.01	112.01		1133.76	932.56	201.2	201.2
74	C4 T0__Pax7_Dll4_GFP 072.nd2	599.74	333.03	266.71	266.71		1324.56	1180.27	144.29	144.29
75	C4 T0__Pax7_Dll4_GFP 072.nd2	581.8	316.87	264.93	264.93		1311.16	1126.67	184.49	184.49
76	C4 T0__Pax7_Dll4_GFP 073.nd2	685.57	376.92	308.65	308.65		1227.15	907.96	319.19	319.19
77	C4 T0__Pax7_Dll4_GFP 073.nd2	635.13	377.4	257.73	257.73		1184.49	935.94	248.55	248.55
78	C4 T0__Pax7_Dll4_GFP 074.nd2	725.42	356.63	368.79	368.79		1211.75	867.76	343.99	343.99
79	C4 T0__Pax7_Dll4_GFP 074.nd2	731.39	349.76	381.63	381.63		1216	864.55	351.45	351.45
80	C4 T0__Pax7_Dll4_GFP 075.nd2	634.28	381.86	252.42	252.42		1627.06	1331.16	295.9	295.9
81	C4 T0__Pax7_Dll4_GFP 075.nd2	656.51	382.97	273.54	273.54		1639.21	1342.53	296.68	296.68
82	C4 T0__Pax7_Dll4_GFP 076.nd2	519.18	324.86	194.32	194.32		1389.44	1111.63	277.81	277.81
83	C4 T0__Pax7_Dll4_GFP 076.nd2	546.62	324.34	222.28	222.28		1417.37	1151.05	266.32	266.32

## Sheet: Ctrl 5
Item	Source	Cy5 (Pax7) mean intensity	Cy5 channel background	Cy5 mean minus background	Pax7 mean intensity		GFP (Notch) mean intensity	GFP channel background	GFP mean minus background	Notch reporter mean intensity
1	C5 T0__Pax7_Dll4_GFP 001.nd2	438.17	238.59	199.58	199.58		942.34	857	85.34	85.34
2	C5 T0__Pax7_Dll4_GFP 002.nd2	673	268.28	404.72	404.72		2052.56	1086.84	965.72	965.72
3	C5 T0__Pax7_Dll4_GFP 002.nd2	569.35	276.06	293.29	293.29		1177.59	1065.6	111.99	111.99
4	C5 T0__Pax7_Dll4_GFP 003.nd2	525.92	281.06	244.86	525.92		1592.53	913.87	678.66	678.66
5	C5 T0__Pax7_Dll4_GFP 004.nd2	460.41	228.62	231.79	231.79		1681.83	1275.58	406.25	406.25
6	C5 T0__Pax7_Dll4_GFP 005.nd2	528.28	328.2	200.08	200.08		1788.43	1721.66	66.77	66.77
7	C5 T0__Pax7_Dll4_GFP 006.nd2	691.43	431.56	259.87	259.87		1266.77	1159.05	107.72	107.72
8	C5 T0__Pax7_Dll4_GFP 006.nd2	889.71	447.09	442.62	442.62		2070.32	1232.94	837.38	837.38
9	C5 T0__Pax7_Dll4_GFP 007.nd2	550.97	322.81	228.16	228.16		1002.95	1032.23	-29.28	0
10	C5 T0__Pax7_Dll4_GFP 008.nd2	412.11	215.26	196.85	196.85		1286.63	992.02	294.61	294.61
11	C5 T0__Pax7_Dll4_GFP 009.nd2	694.24	335.67	358.57	358.57		1633.11	1432.57	200.54	200.54
12	C5 T0__Pax7_Dll4_GFP 010.nd2	824.22	412.4	411.82	411.82		2570.53	1928.15	642.38	642.38
13	C5 T0__Pax7_Dll4_GFP 011.nd2	522.36	236.61	285.75	285.75		1613.83	1104.66	509.17	509.17
14	C5 T0__Pax7_Dll4_GFP 012.nd2	541.39	267.69	273.7	273.7		1469.08	1374.45	94.63	94.63
15	C5 T0__Pax7_Dll4_GFP 015.nd2	372.74	234.13	138.61	138.61		1050.94	828.5	222.44	222.44
16	C5 T0__Pax7_Dll4_GFP 016.nd2	620.11	423.8	196.31	196.31		1349.05	1323.81	25.24	25.24
17	C5 T0__Pax7_Dll4_GFP 017.nd2	505.04	323.65	181.39	181.39		1013.46	1138.54	-125.08	0
18	C5 T0__Pax7_Dll4_GFP 018.nd2	756.6	402.29	354.31	354.31		2411.79	2114.09	297.7	297.7
19	C5 T0__Pax7_Dll4_GFP 019.nd2	394.14	303.08	91.06	91.06		2049.47	1869.04	180.43	180.43
20	C5 T0__Pax7_Dll4_GFP 020.nd2	613.43	197.18	416.25	416.25		1589.52	1077.65	511.87	511.87
21	C5 T0__Pax7_Dll4_GFP 021.nd2	628.21	374.79	253.42	253.42		1846.39	1553.78	292.61	292.61
22	C5 T0__Pax7_Dll4_GFP 022.nd2	804.92	334.05	470.87	470.87		2678.39	1935.64	742.75	742.75
23	C5 T0__Pax7_Dll4_GFP 023.nd2	688.09	434.18	253.91	253.91		1689.67	1416.91	272.76	272.76
24	C5 T0__Pax7_Dll4_GFP 024.nd2	863.19	429.11	434.08	434.08		2372.69	1930.48	442.21	442.21
25	C5 T0__Pax7_Dll4_GFP 025.nd2	816.43	437.53	378.9	378.9		1961.62	1724.43	237.19	237.19
26	C5 T0__Pax7_Dll4_GFP 026.nd2	598.91	287.33	311.58	311.58		959.05	864.12	94.93	94.93
27	C5 T0__Pax7_Dll4_GFP 027.nd2	783.15	412.28	370.87	370.87		2294.7	1814.93	479.77	479.77
28	C5 T0__Pax7_Dll4_GFP 028.nd2	702.9	235.89	467.01	467.01		840.3	566.33	273.97	273.97
29	C5 T0__Pax7_Dll4_GFP 028.nd2	1109.99	438.7	671.29	671.29		2420.1	1553.54	866.56	866.56
30	C5 T0__Pax7_Dll4_GFP 028.nd2	554.02	286.8	267.22	267.22		1384.1	1077.86	306.24	306.24
31	C5 T0__Pax7_Dll4_GFP 029.nd2	841.55	432.63	408.92	408.92		2011.41	1476.43	534.98	534.98
32	C5 T0__Pax7_Dll4_GFP 031.nd2	540.65	299.54	241.11	241.11		1367.89	1254.36	113.53	113.53
33	C5 T0__Pax7_Dll4_GFP 031.nd2	664.42	360.75	303.67	303.67		1512.12	1318.46	193.66	193.66
34	C5 T0__Pax7_Dll4_GFP 032.nd2	565.05	372.2	192.85	192.85		2401.5	1778.49	623.01	623.01
35	C5 T0__Pax7_Dll4_GFP 032.nd2	469.99	281.85	188.14	188.14		1391.56	1394.92	-3.36	0
36	C5 T0__Pax7_Dll4_GFP 033.nd2	617.46	348.14	269.32	269.32		1664.51	1626.6	37.91	37.91
37	C5 T0__Pax7_Dll4_GFP 034.nd2	633.51	390.14	243.37	243.37		2175.85	2009.28	166.57	166.57
38	C5 T0__Pax7_Dll4_GFP 035.nd2	1159.63	494.9	664.73	664.73		2805.8	1938.92	866.88	866.88
39	C5 T0__Pax7_Dll4_GFP 036.nd2	800.15	364.02	436.13	436.13		1988.8	1486.91	501.89	501.89
40	C5 T0__Pax7_Dll4_GFP 037.nd2	926.01	342.46	583.55	583.55		2566.43	1972.01	594.42	594.42
41	C5 T0__Pax7_Dll4_GFP 038.nd2	847.06	344.12	502.94	502.94		2083.45	1579.6	503.85	503.85
42	C5 T0__Pax7_Dll4_GFP 039.nd2	929.65	336.9	592.75	592.75		2248.83	1460.13	788.7	788.7
43	C5 T0__Pax7_Dll4_GFP 040.nd2	999.9	398.71	601.19	601.19		2236.52	1368.96	867.56	867.56
44	C5 T0__Pax7_Dll4_GFP 041.nd2	659.42	426.72	232.7	232.7		1926.16	1824.94	101.22	101.22
45	C5 T0__Pax7_Dll4_GFP 043.nd2	1112.5	420.09	692.41	692.41		2216.49	1427.53	788.96	788.96
46	C5 T0__Pax7_Dll4_GFP 044.nd2	663	281.23	381.77	381.77		1366.51	1101.01	265.5	265.5
47	C5 T0__Pax7_Dll4_GFP 045.nd2	977.19	331.29	645.9	645.9		2161.74	1570.22	591.52	591.52
48	C5 T0__Pax7_Dll4_GFP 046.nd2	886.47	265.62	620.85	620.85		2449.67	1588.62	861.05	861.05
49	C5 T0__Pax7_Dll4_GFP 046.nd2	868.71	296.58	572.13	572.13		3189.11	2445.62	743.49	743.49
50	C5 T0__Pax7_Dll4_GFP 046.nd2	732.62	268.94	463.68	463.68		2045.76	1678.6	367.16	367.16
51	C5 T0__Pax7_Dll4_GFP 047.nd2	1186.84	392.7	794.14	794.14		2307.49	1415.09	892.4	892.4
52	C5 T0__Pax7_Dll4_GFP 048.nd2	1167.6	473.3	694.3	694.3		2534.77	1634	900.77	900.77
53	C5 T0__Pax7_Dll4_GFP 049.nd2	1135.88	658.15	477.73	477.73		2672.15	1924.74	747.41	747.41
54	C5 T0__Pax7_Dll4_GFP 050.nd2	722.7	328.47	394.23	394.23		1541.6	1209.55	332.05	332.05
55	C5 T0__Pax7_Dll4_GFP 050.nd2	804.3	443.18	361.12	361.12		2610.79	1889.05	721.74	721.74
56	C5 T0__Pax7_Dll4_GFP 051.nd2	547.82	340.41	207.41	207.41		1760.07	1443.53	316.54	316.54
57	C5 T0__Pax7_Dll4_GFP 052.nd2	1117.44	382.06	735.38	735.38		3426.4	1633.04	1793.36	1793.36
58	C5 T0__Pax7_Dll4_GFP 054.nd2	608.07	343.61	264.46	264.46		1339.91	1220.92	118.99	118.99
59	C5 T0__Pax7_Dll4_GFP 056.nd2	965.47	293.7	671.77	671.77		1955.45	1125.67	829.78	829.78
60	C5 T0__Pax7_Dll4_GFP 058.nd2	1049.42	295.94	753.48	753.48		2245.41	1166.5	1078.91	1078.91
61	C5 T0__Pax7_Dll4_GFP 058.nd2	976.38	195.65	780.73	780.73		1987.83	950.25	1037.58	1037.58
62	C5 T0__Pax7_Dll4_GFP 060.nd2	726.34	368.14	358.2	358.2		2314.91	1728.22	586.69	586.69
63	C5 T0__Pax7_Dll4_GFP 061.nd2	624.04	329.16	294.88	294.88		1294.97	1240.16	54.81	54.81
64	C5 T0__Pax7_Dll4_GFP 062.nd2	738.57	282.05	456.52	456.52		2364.4	1343.28	1021.12	1021.12
65	C5 T0__Pax7_Dll4_GFP 063.nd2	529.62	351.25	178.37	178.37		1747.33	1705.23	42.1	42.1
66	C5 T0__Pax7_Dll4_GFP 064.nd2	595.67	288.89	306.78	306.78		1334.05	997.46	336.59	336.59
67	C5 T0__Pax7_Dll4_GFP 064.nd2	458.69	273.39	185.3	185.3		1258.83	894.06	364.77	364.77
68	C5 T0__Pax7_Dll4_GFP 065.nd2	571.75	284.55	287.2	287.2		1819.45	1222.47	596.98	596.98
69	C5 T0__Pax7_Dll4_GFP 066.nd2	546.6	314.26	232.34	232.34		2004.9	1236.74	768.16	768.16
70	C5 T0__Pax7_Dll4_GFP 067.nd2	475.7	287.73	187.97	187.97		1672.66	1218.32	454.34	454.34
71	C5 T0__Pax7_Dll4_GFP 068.nd2	681.22	326.69	354.53	354.53		1895.18	1597.42	297.76	297.76
72	C5 T0__Pax7_Dll4_GFP 068.nd2	634.96	346.42	288.54	288.54		1592.67	1386.18	206.49	206.49
73	C5 T0__Pax7_Dll4_GFP 069.nd2	774.6	223.65	550.95	550.95		2394.76	1251.14	1143.62	1143.62
74	C5 T0__Pax7_Dll4_GFP 069.nd2	852.24	288.55	563.69	563.69		2921.23	1834.62	1086.61	1086.61
75	C5 T0__Pax7_Dll4_GFP 070.nd2	546.97	339.94	207.03	207.03		2581.8	1831.55	750.25	750.25
76	C5 T0__Pax7_Dll4_GFP 072.nd2	753.68	402.85	350.83	350.83		2389.12	2217.5	171.62	171.62
77	C5 T0__Pax7_Dll4_GFP 072.nd2	558.23	304.25	253.98	253.98		2141.97	1817.71	324.26	324.26
78	C5 T0__Pax7_Dll4_GFP 072.nd2	563.03	313.23	249.8	249.8		2246.6	1709.66	536.94	536.94
79	C5 T0__Pax7_Dll4_GFP 073.nd2	562.47	422.36	140.11	140.11		2637.06	2652.58	-15.52	0
80	C5 T0__Pax7_Dll4_GFP 074.nd2	580.93	316.24	264.69	264.69		1777.74	1523.8	253.94	253.94
81	C5 T0__Pax7_Dll4_GFP 075.nd2	591.58	318.14	273.44	273.44		1749.43	1170.06	579.37	579.37
82	C5 T0__Pax7_Dll4_GFP 076.nd2	500.07	257.48	242.59	242.59		1606.36	1141.06	465.3	465.3

## Sheet: Ctrl 6
Item	Source	Cy5 (Pax7) mean intensity	Cy5 channel background	Cy5 mean minus background	Pax7 mean intensity		GFP (Notch) mean intensity	GFP channel background	GFP mean minus background	Notch reporter mean intensity
1	C6 T0__Pax7_Dll4_GFP 001.nd2	516.2	271.01	245.19	245.19		1217.75	1103.68	114.07	114.07
2	C6 T0__Pax7_Dll4_GFP 002.nd2	596.38	326.88	269.5	269.5		2162.89	1939.54	223.35	223.35
3	C6 T0__Pax7_Dll4_GFP 003.nd2	540.78	258.86	281.92	281.92		1468.98	1263.37	205.61	205.61
4	C6 T0__Pax7_Dll4_GFP 004.nd2	645.48	148.32	497.16	497.16		1511.57	1339.48	172.09	172.09
5	C6 T0__Pax7_Dll4_GFP 005.nd2	804.61	332.8	471.81	471.81		1567.25	1293.99	273.26	273.26
6	C6 T0__Pax7_Dll4_GFP 006.nd2	616.29	295.26	321.03	321.03		1208.9	1071.52	137.38	137.38
7	C6 T0__Pax7_Dll4_GFP 007.nd2	685.27	341.67	343.6	343.6		1838.82	1521.95	316.87	316.87
8	C6 T0__Pax7_Dll4_GFP 009.nd2	700.01	381.08	318.93	318.93		1438.69	1353.22	85.47	85.47
9	C6 T0__Pax7_Dll4_GFP 009.nd2	570.72	335.37	235.35	235.35		1287.01	1131.64	155.37	155.37
10	C6 T0__Pax7_Dll4_GFP 010.nd2	667.78	337.51	330.27	330.27		1467.93	1124.57	343.36	343.36
11	C6 T0__Pax7_Dll4_GFP 010.nd2	494.37	330.73	163.64	163.64		1361.25	1163.79	197.46	197.46
12	C6 T0__Pax7_Dll4_GFP 011.nd2	725.49	311.49	414	414		2028.75	1367.39	661.36	661.36
13	C6 T0__Pax7_Dll4_GFP 015.nd2	1138.32	501.81	636.51	636.51		2195.06	1691.54	503.52	503.52
14	C6 T0__Pax7_Dll4_GFP 016.nd2	578.86	350.46	228.4	228.4		1285.33	1089.14	196.19	196.19
15	C6 T0__Pax7_Dll4_GFP 017.nd2	573.37	365.3	208.07	208.07		938.51	851.92	86.59	86.59
16	C6 T0__Pax7_Dll4_GFP 018.nd2	795.71	342.55	453.16	453.16		1518.45	1299.62	218.83	218.83
17	C6 T0__Pax7_Dll4_GFP 019.nd2	801.35	378.9	422.45	422.45		1782.4	1401.5	380.9	380.9
18	C6 T0__Pax7_Dll4_GFP 020.nd2	773.4	386.1	387.3	387.3		1538.96	1322.31	216.65	216.65
19	C6 T0__Pax7_Dll4_GFP 021.nd2	720.65	479	241.65	241.65		1947.45	1843.17	104.28	104.28
20	C6 T0__Pax7_Dll4_GFP 022.nd2	767.76	418.65	349.11	349.11		1884.93	1722.57	162.36	162.36
21	C6 T0__Pax7_Dll4_GFP 023.nd2	738.01	331.77	406.24	406.24		1999.96	1519.26	480.7	480.7
22	C6 T0__Pax7_Dll4_GFP 024.nd2	758.76	445.08	313.68	313.68		2581.22	1696.65	884.57	884.57
23	C6 T0__Pax7_Dll4_GFP 025.nd2	692.68	361.56	331.12	331.12		2125.99	1432.47	693.52	693.52
24	C6 T0__Pax7_Dll4_GFP 026.nd2	752.08	394.43	357.65	357.65		1494.52	1355.34	139.18	139.18
25	C6 T0__Pax7_Dll4_GFP 027.nd2	738.17	352.8	385.37	385.37		1836.05	1676.34	159.71	159.71
26	C6 T0__Pax7_Dll4_GFP 028.nd2	705.74	310.23	395.51	395.51		1615.1	1264.5	350.6	350.6
27	C6 T0__Pax7_Dll4_GFP 028.nd2			0	0				0	0
28	C6 T0__Pax7_Dll4_GFP 029.nd2	570.89	322.53	248.36	248.36		1224.64	1468.06	-243.42	0
29	C6 T0__Pax7_Dll4_GFP 030.nd2	665.08	381.01	284.07	284.07		1157.98	1694.28	-536.3	0
30	C6 T0__Pax7_Dll4_GFP 031.nd2	632.67	409.22	223.45	223.45		1973.23	1830.98	142.25	142.25
31	C6 T0__Pax7_Dll4_GFP 032.nd2	650.78	384.21	266.57	266.57		1752.64	1660.11	92.53	92.53
32	C6 T0__Pax7_Dll4_GFP 033.nd2	669.65	326.08	343.57	343.57		1537.24	1017.11	520.13	520.13
33	C6 T0__Pax7_Dll4_GFP 034.nd2	814.93	355.53	459.4	459.4		1409.36	1146.15	263.21	263.21
34	C6 T0__Pax7_Dll4_GFP 035.nd2	711.72	345.77	365.95	365.95		1268.71	1086.64	182.07	182.07
35	C6 T0__Pax7_Dll4_GFP 035.nd2	638.9	291.98	346.92	346.92		1276.95	1106.15	170.8	170.8
36	C6 T0__Pax7_Dll4_GFP 036.nd2	517.02	281.05	235.97	235.97		719.27	911.8	-192.53	0
37	C6 T0__Pax7_Dll4_GFP 037.nd2	685.87	290.51	395.36	395.36		1447.62	1214.57	233.05	233.05
38	C6 T0__Pax7_Dll4_GFP 037.nd2	509.77	266.63	243.14	243.14		1162.26	1003.9	158.36	158.36
39	C6 T0__Pax7_Dll4_GFP 039.nd2	827.81	402.75	425.06	425.06		3201.65	1621.25	1580.4	1580.4
40	C6 T0__Pax7_Dll4_GFP 040.nd2	721.1	356.24	364.86	364.86		1663.61	1472.08	191.53	191.53
41	C6 T0__Pax7_Dll4_GFP 042.nd2	653.91	363.7	290.21	290.21		2137.92	1811.08	326.84	326.84
42	C6 T0__Pax7_Dll4_GFP 043.nd2	843.94	447.71	396.23	396.23		1996.3	1669.27	327.03	327.03
43	C6 T0__Pax7_Dll4_GFP 044.nd2	828.6	411.07	417.53	417.53		1745.82	1235.08	510.74	510.74
44	C6 T0__Pax7_Dll4_GFP 045.nd2	591.94	307.74	284.2	284.2		1292.1	1172.62	119.48	119.48
45	C6 T0__Pax7_Dll4_GFP 049.nd2	507.09	302.7	204.39	204.39		1404.66	1234.79	169.87	169.87
46	C6 T0__Pax7_Dll4_GFP 052.nd2	1099.96	843.22	256.74	256.74		2914.52	2810.91	103.61	103.61
47	C6 T0__Pax7_Dll4_GFP 053.nd2	1157.83	692.38	465.45	465.45		3350.28	2898.55	451.73	451.73
48	C6 T0__Pax7_Dll4_GFP 055.nd2	831.97	547.97	284	284		3117.1	3077.41	39.69	39.69
49	C6 T0__Pax7_Dll4_GFP 056.nd2	624.56	290.83	333.73	333.73		1507.73	1168.19	339.54	339.54
50	C6 T0__Pax7_Dll4_GFP 057.nd2	735.8	392.6	343.2	343.2		1881.4	1480.25	401.15	401.15
51	C6 T0__Pax7_Dll4_GFP 058.nd2	570.21	355.59	214.62	214.62		1426.9	1233.31	193.59	193.59
52	C6 T0__Pax7_Dll4_GFP 059.nd2	748.91	319.79	429.12	429.12		2498.52	1369.44	1129.08	1129.08
53	C6 T0__Pax7_Dll4_GFP 060.nd2	934.84	450.44	484.4	484.4		2461.36	1776.64	684.72	684.72
54	C6 T0__Pax7_Dll4_GFP 061.nd2	565.52	307.99	257.53	257.53		1274.3	1048.34	225.96	225.96
55	C6 T0__Pax7_Dll4_GFP 062.nd2	743.92	345.54	398.38	398.38		1612.73	1090.97	521.76	521.76
56	C6 T0__Pax7_Dll4_GFP 063.nd2	708.2	362.66	345.54	345.54		1861.58	1191.03	670.55	670.55
57	C6 T0__Pax7_Dll4_GFP 064.nd2	683.42	329.55	353.87	353.87		1652.67	1450.3	202.37	202.37
58	C6 T0__Pax7_Dll4_GFP 066.nd2	1090.39	524.14	566.25	566.25		2694.18	2115.31	578.87	578.87
59	C6 T0__Pax7_Dll4_GFP 067.nd2	1030.46	501.53	528.93	528.93		3338.6	2002.55	1336.05	1336.05
60	C6 T0__Pax7_Dll4_GFP 068.nd2	1056.43	532.4	524.03	524.03		2476.88	2120.78	356.1	356.1
61	C6 T0__Pax7_Dll4_GFP 069.nd2	1089.04	548.1	540.94	540.94		2741.51	2297.78	443.73	443.73
62	C6 T0__Pax7_Dll4_GFP 070.nd2	678.78	354.39	324.39	324.39		2230.63	1535.4	695.23	695.23
63	C6 T0__Pax7_Dll4_GFP 071.nd2	426.41	225.24	201.17	201.17		1078.75	939.93	138.82	138.82
64	C6 T0__Pax7_Dll4_GFP 072.nd2	591.35	244.33	347.02	347.02		1414.84	1132.87	281.97	281.97
65	C6 T0__Pax7_Dll4_GFP 073.nd2	689.55	420.06	269.49	269.49		2365.77	1818.67	547.1	547.1
66	C6 T0__Pax7_Dll4_GFP 074.nd2	676.73	390.39	286.34	286.34		2260.57	1871.11	389.46	389.46
67	C6 T0__Pax7_Dll4_GFP 075.nd2	1047.9	449.56	598.34	598.34		2381.97	1692.23	689.74	689.74

## Sheet: Expt 5
Item	Source	Cy5 (Pax7) mean intensity	Cy5 channel background	Cy5 mean minus background	Pax7 mean intensity		GFP (Notch) mean intensity	GFP channel background	GFP mean minus background	Notch reporter mean intensity
1	E5 T0__Pax7_Dll4_GFP 076.nd2	669.27	306.11	363.16	363.16		1216.11	1155.76	60.35	60.35
2	E5 T0__Pax7_Dll4_GFP 079.nd2	426.81	300.63	126.18	126.18		1106.6	1011.7	94.9	94.9
3	E5 T0__Pax7_Dll4_GFP 081.nd2	539.31	293.89	245.42	245.42		844.64	793.79	50.85	50.85
4	E5 T0__Pax7_Dll4_GFP 083.nd2	558.21	327.18	231.03	231.03		1815.47	1677.32	138.15	138.15
5	E5 T0__Pax7_Dll4_GFP 084.nd2	560.21	313.25	246.96	246.96		1540.9	1496.46	44.44	44.44
6	E5 T0__Pax7_Dll4_GFP 085.nd2	722.1	357.91	364.19	364.19		1825.59	1745.37	80.22	80.22
7	E5 T0__Pax7_Dll4_GFP 086.nd2	614.97	314.95	300.02	300.02		1043.72	1222.04	-178.32	0
8	E5 T0__Pax7_Dll4_GFP 087.nd2	581.45	284.97	296.48	296.48		821.09	1118.29	-297.2	0
9	E5 T0__Pax7_Dll4_GFP 088.nd2	922.35	485.54	436.81	436.81		1864.42	1673.42	191	191
10	E5 T0__Pax7_Dll4_GFP 095.nd2	669.09	370.68	298.41	298.41		798.39	998.25	-199.86	0
11	E5 T0__Pax7_Dll4_GFP 096.nd2	542.58	290.4	252.18	252.18		1049.34	1024.67	24.67	24.67
12	E5 T0__Pax7_Dll4_GFP 100.nd2	667.24	320.05	347.19	347.19		1432.13	1308.12	124.01	124.01
13	E5 T0__Pax7_Dll4_GFP 101.nd2	768.56	472.45	296.11	296.11		1762.02	1590.65	171.37	171.37
14	E5 T0__Pax7_Dll4_GFP 102.nd2	605.11	381.75	223.36	223.36		1731.2	1434.65	296.55	296.55
15	E5 T0__Pax7_Dll4_GFP 104.nd2	664.03	402.28	261.75	261.75		1179.17	1419.7	-240.53	0
16	E5 T0__Pax7_Dll4_GFP 109.nd2	680.04	357.19	322.85	322.85		1331.14	1973.11	-641.97	0
17	E5 T0__Pax7_Dll4_GFP 109.nd2	715.03	275.8	439.23	439.23		1261.05	1803.37	-542.32	0
18	E5 T0__Pax7_Dll4_GFP 111.nd2	567.24	270.84	296.4	296.4		1371.79	1326.29	45.5	45.5
19	E5 T0__Pax7_Dll4_GFP 112.nd2	906.69	507.4	399.29	399.29		3804.1	3794.28	9.82	9.82
20	E5 T0__Pax7_Dll4_GFP 114.nd2	787.52	390.62	396.9	396.9		1905.15	1763.57	141.58	141.58
21	E5 T0__Pax7_Dll4_GFP 116.nd2	669.76	344.36	325.4	325.4		1035.87	1138.15	-102.28	0
22	E5 T0__Pax7_Dll4_GFP 118.nd2	644.26	237.74	406.52	406.52		884.31	881.14	3.17	3.17
23	E5 T0__Pax7_Dll4_GFP 129.nd2	598.42	322.91	275.51	275.51		1175.75	1074.49	101.26	101.26
24	E5 T0__Pax7_Dll4_GFP 135.nd2	727.2	397.85	329.35	329.35		1847.26	1706.97	140.29	140.29
25	E5 T0__Pax7_Dll4_GFP 139.nd2	827.3	399.08	428.22	428.22		1896.91	1927.32	-30.41	0
26	E5 T0__Pax7_Dll4_GFP 142.nd2	931.81	519.92	411.89	411.89		2654.95	2576.77	78.18	78.18
27	E5 T0__Pax7_Dll4_GFP 143.nd2	659.48	359.74	299.74	299.74		1401.6	1445.9	-44.3	0
28	E5 T0__Pax7_Dll4_GFP 144.nd2	620.59	355.85	264.74	264.74		1317.91	1543.79	-225.88	0
29	E5 T0__Pax7_Dll4_GFP 145.nd2	576.85	333.53	243.32	243.32		1552.48	1419.43	133.05	133.05
30	E5 T0__Pax7_Dll4_GFP 147.nd2	827.39	387.1	440.29	440.29		1454.87	1343.09	111.78	111.78
31	E5 T0__Pax7_Dll4_GFP 148.nd2	589.16	316.19	272.97	272.97		1436.03	1320.08	115.95	115.95

## Sheet: Expt 7
Item	Source	Cy5 (Pax7) mean intensity	Cy5 channel background	Cy5 mean minus background	Pax7 mean intensity		GFP (Notch) mean intensity	GFP channel background	GFP mean minus background	Notch reporter mean intensity
1	E7 T0__Pax7_Dll4_GFP 001.nd2	606.96	375.62	231.34	231.34		1124.75	1092.24	32.51	32.51
2	E7 T0__Pax7_Dll4_GFP 002.nd2	740.95	390.39	350.56	350.56		1250.17	1155.65	94.52	94.52
3	E7 T0__Pax7_Dll4_GFP 003.nd2	571.61	381.51	190.1	190.1		1404.46	1298.2	106.26	106.26
4	E7 T0__Pax7_Dll4_GFP 004.nd2	428.44	306.05	122.39	122.39		1202.59	1206.96	-4.37	0
5	E7 T0__Pax7_Dll4_GFP 005.nd2	847.37	399.71	447.66	447.66		1633.18	1596.36	36.82	36.82
6	E7 T0__Pax7_Dll4_GFP 007.nd2	653.22	368.45	284.77	284.77		1850.08	1848.66	1.42	1.42
7	E7 T0__Pax7_Dll4_GFP 008.nd2	650.82	351.61	299.21	299.21		1454	1383.12	70.88	70.88
8	E7 T0__Pax7_Dll4_GFP 009.nd2	578.57	290.28	288.29	288.29		1193.29	1188.59	4.7	4.7
9	E7 T0__Pax7_Dll4_GFP 010.nd2	535.04	240.8	294.24	294.24		1202.49	1059.24	143.25	143.25
10	E7 T0__Pax7_Dll4_GFP 011.nd2	671.61	339.43	332.18	332.18		1420.18	1393.74	26.44	26.44
11	E7 T0__Pax7_Dll4_GFP 012.nd2	611.59	309.09	302.5	302.5		1463.28	1366.45	96.83	96.83
12	E7 T0__Pax7_Dll4_GFP 013.nd2	561.71	301.95	259.76	259.76		1162.24	1128.03	34.21	34.21
13	E7 T0__Pax7_Dll4_GFP 014.nd2	737.23	315.51	421.72	421.72		1099.24	1070.09	29.15	29.15
14	E7 T0__Pax7_Dll4_GFP 015.nd2	673.84	319.24	354.6	354.6		1278.74	1180.75	97.99	97.99
15	E7 T0__Pax7_Dll4_GFP 016.nd2	569.17	246.53	322.64	322.64		883.88	1005.09	-121.21	0
16	E7 T0__Pax7_Dll4_GFP 017.nd2	564.38	265.41	298.97	298.97		1347.21	1237.5	109.71	109.71
17	E7 T0__Pax7_Dll4_GFP 019.nd2	436.98	263.39	173.59	173.59		1395.92	1416.21	-20.29	0
18	E7 T0__Pax7_Dll4_GFP 020.nd2	789.38	339.37	450.01	450.01		1527.26	1413.97	113.29	113.29
19	E7 T0__Pax7_Dll4_GFP 023.nd2	804.55	435.53	369.02	369.02		3206.63	3436.55	-229.92	0
20	E7 T0__Pax7_Dll4_GFP 024.nd2	508.77	253.95	254.82	254.82		1019.19	1494.14	-474.95	0
21	E7 T0__Pax7_Dll4_GFP 025.nd2	461.09	261.3	199.79	199.79		762.53	1025.24	-262.71	0
22	E7 T0__Pax7_Dll4_GFP 026.nd2	474.29	262.41	211.88	211.88		1254.57	1207.71	46.86	46.86
23	E7 T0__Pax7_Dll4_GFP 027.nd2	654.62	345.01	309.61	309.61		1749.86	1756.32	-6.46	0
24	E7 T0__Pax7_Dll4_GFP 027.nd2	807.73	377.3	430.43	430.43		1962.74	1879.34	83.4	83.4
25	E7 T0__Pax7_Dll4_GFP 028.nd2	678.71	295.62	383.09	383.09		1445.83	1318.09	127.74	127.74
26	E7 T0__Pax7_Dll4_GFP 029.nd2	747.6	358.68	388.92	388.92		1483.3	1341.69	141.61	141.61
27	E7 T0__Pax7_Dll4_GFP 030.nd2	586.99	317.18	269.81	269.81		1310.73	1257.37	53.36	53.36
28	E7 T0__Pax7_Dll4_GFP 031.nd2	771.02	385.15	385.87	385.87		2883.21	2792.44	90.77	90.77
29	E7 T0__Pax7_Dll4_GFP 032.nd2	495.23	328.34	166.89	166.89		1617.24	2049.53	-432.29	0
30	E7 T0__Pax7_Dll4_GFP 034.nd2	493.5	350.13	143.37	143.37		2396.57	2919.91	-523.34	0
31	E7 T0__Pax7_Dll4_GFP 035.nd2	637.78	334.67	303.11	303.11		2125.11	2083.8	41.31	41.31
32	E7 T0__Pax7_Dll4_GFP 036.nd2	722.11	341.25	380.86	380.86		1386.26	1270.88	115.38	115.38
33	E7 T0__Pax7_Dll4_GFP 037.nd2	350.78	212.15	138.63	138.63		783.68	740.04	43.64	43.64
34	E7 T0__Pax7_Dll4_GFP 037.nd2	434.87	220.87	214	214		1041.71	1002.49	39.22	39.22
35	E7 T0__Pax7_Dll4_GFP 038.nd2	538.41	290.44	247.97	247.97		1181.97	1147.64	34.33	34.33
36	E7 T0__Pax7_Dll4_GFP 040.nd2	748.84	414.47	334.37	334.37		2783.63	2822.13	-38.5	0
37	E7 T0__Pax7_Dll4_GFP 042.nd2	637.51	364.22	273.29	273.29		1512.42	1400.06	112.36	112.36
38	E7 T0__Pax7_Dll4_GFP 043.nd2	713.65	345.34	368.31	368.31		1701.68	1567.27	134.41	134.41
39	E7 T0__Pax7_Dll4_GFP 044.nd2	536.2	272.86	263.34	263.34		926.76	1051.75	-124.99	0
40	E7 T0__Pax7_Dll4_GFP 045.nd2	721.21	329.83	391.38	391.38		1289.33	1298.9	-9.57	0
41	E7 T0__Pax7_Dll4_GFP 047.nd2	522.62	285.56	237.06	237.06		580.62	1001.62	-421	0
42	E7 T0__Pax7_Dll4_GFP 048.nd2	607.91	353.07	254.84	254.84		956.5	1128.16	-171.66	0
43	E7 T0__Pax7_Dll4_GFP 049.nd2	551.71	329.52	222.19	222.19		1068.36	1456.27	-387.91	0
44	E7 T0__Pax7_Dll4_GFP 050.nd2	753.96	367.05	386.91	386.91		1314.09	1741.72	-427.63	0
45	E7 T0__Pax7_Dll4_GFP 051.nd2	669.43	421.08	248.35	248.35		2682.3	2498.46	183.84	183.84
46	E7 T0__Pax7_Dll4_GFP 052.nd2	433.26	319.45	113.81	113.81		1012.45	1559.88	-547.43	0
47	E7 T0__Pax7_Dll4_GFP 053.nd2	418.01	290.78	127.23	127.23		1812.39	1804.32	8.07	8.07
48	E7 T0__Pax7_Dll4_GFP 054.nd2	529.51	311.29	218.22	218.22		1062.53	998.44	64.09	64.09
49	E7 T0__Pax7_Dll4_GFP 057.nd2	496.58	284.53	212.05	212.05		980.67	1190.84	-210.17	0
50	E7 T0__Pax7_Dll4_GFP 059.nd2	472.8	275.91	196.89	196.89		1200.82	1154.61	46.21	46.21
51	E7 T0__Pax7_Dll4_GFP 060.nd2	638.63	372.99	265.64	265.64		1194.83	1363	-168.17	0
52	E7 T0__Pax7_Dll4_GFP 061.nd2	603.98	337.27	266.71	266.71		1196.1	1064.24	131.86	131.86
53	E7 T0__Pax7_Dll4_GFP 062.nd2	872.99	470.66	402.33	402.33		2714.26	2929.83	-215.57	0
54	E7 T0__Pax7_Dll4_GFP 064.nd2	580.11	244.78	335.33	335.33		975.08	906.93	68.15	68.15
55	E7 T0__Pax7_Dll4_GFP 065.nd2	605.63	306.73	298.9	298.9		967.34	930.58	36.76	36.76
56	E7 T0__Pax7_Dll4_GFP 067.nd2	498.99	402.38	96.61	96.61		655.69	719.4	-63.71	0
57	E7 T0__Pax7_Dll4_GFP 069.nd2	720.95	452.25	268.7	268.7		2060.4	2025.73	34.67	34.67
58	E7 T0__Pax7_Dll4_GFP 070.nd2	715.7	366.66	349.04	349.04		1884.44	2013.76	-129.32	0
59	E7 T0__Pax7_Dll4_GFP 071.nd2	657.24	262.58	394.66	394.66		867.3	1025.96	-158.66	0
60	E7 T0__Pax7_Dll4_GFP 072.nd2	507.37	296.52	210.85	210.85		989.88	1272.2	-282.32	0
61	E7 T0__Pax7_Dll4_GFP 073.nd2	444.04	286.26	157.78	157.78		979.08	902.85	76.23	76.23
62	E7 T0__Pax7_Dll4_GFP 074.nd2	579.18	314.83	264.35	264.35		1063.94	1107.85	-43.91	0
63	E7 T0__Pax7_Dll4_GFP 075.nd2	734.63	314.61	420.02	420.02		1325.3	1250.63	74.67	74.67

## Sheet: Expt 8
Item	Source	Cy5 (Pax7) mean intensity	Cy5 channel background	Cy5 mean minus background	Pax7 mean intensity		GFP (Notch) mean intensity	GFP channel background	GFP mean minus background	Notch reporter mean intensity
1	E8 T0__Pax7_Dll4_GFP 001.nd2	544.16	242.95	301.21	301.21		642.06	801.82	-159.76	0
2	E8 T0__Pax7_Dll4_GFP 002.nd2	389.49	175.67	213.82	213.82		691.25	587.16	104.09	104.09
3	E8 T0__Pax7_Dll4_GFP 003.nd2	580.06	241.28	338.78	338.78		1157.65	818.84	338.81	338.81
4	E8 T0__Pax7_Dll4_GFP 004.nd2	568.78	261.55	307.23	307.23		584.66	836.98	-252.32	0
5	E8 T0__Pax7_Dll4_GFP 005.nd2	584.2	242.34	341.86	341.86		1339.67	1138.2	201.47	201.47
6	E8 T0__Pax7_Dll4_GFP 006.nd2	395.68	207.6	188.08	188.08		745.06	648.92	96.14	96.14
7	E8 T0__Pax7_Dll4_GFP 007.nd2	560.27	264.07	296.2	296.2		1087.61	1168.51	-80.9	0
8	E8 T0__Pax7_Dll4_GFP 008.nd2	552.45	280.71	271.74	271.74		1401.48	1331.3	70.18	70.18
9	E8 T0__Pax7_Dll4_GFP 009.nd2	664.86	290.87	373.99	373.99		1451.55	1141.66	309.89	309.89
10	E8 T0__Pax7_Dll4_GFP 010.nd2	642.59	321.41	321.18	321.18		1444.87	1407.97	36.9	36.9
11	E8 T0__Pax7_Dll4_GFP 011.nd2	638.97	365.35	273.62	273.62		2314.55	2031.1	283.45	283.45
12	E8 T0__Pax7_Dll4_GFP 012.nd2	490.17	326.9	163.27	163.27		1898.69	1957.52	-58.83	0
13	E8 T0__Pax7_Dll4_GFP 013.nd2	452.76	338.36	114.4	114.4		2877.41	2480.94	396.47	396.47
14	E8 T0__Pax7_Dll4_GFP 014.nd2	642.51	323.34	319.17	319.17		1687.76	1448.37	239.39	239.39
15	E8 T0__Pax7_Dll4_GFP 015.nd2	745.96	342.71	403.25	403.25		1258.01	1296.43	-38.42	0
16	E8 T0__Pax7_Dll4_GFP 015.nd2	720.35	406.44	313.91	313.91		1872.14	1673.36	198.78	198.78
18	E8 T0__Pax7_Dll4_GFP 018.nd2	646.51	392.41	254.1	254.1		1629.86	1940.33	-310.47	0
19	E8 T0__Pax7_Dll4_GFP 019.nd2	660.68	353.09	307.59	307.59		1749.94	1412.13	337.81	337.81
20	E8 T0__Pax7_Dll4_GFP 022.nd2	413.76	249.9	163.86	163.86		1597.18	1563.41	33.77	33.77
21	E8 T0__Pax7_Dll4_GFP 023.nd2	826.9	489.86	337.04	337.04		2173.46	2104.87	68.59	68.59
22	E8 T0__Pax7_Dll4_GFP 024.nd2	553.37	292.91	260.46	260.46		1036.25	1554.5	-518.25	0
23	E8 T0__Pax7_Dll4_GFP 025.nd2	499.95	273.08	226.87	226.87		1378.73	1128.9	249.83	249.83
24	E8 T0__Pax7_Dll4_GFP 026.nd2	276.91	225.06	51.85	51.85		1699.6	1561.4	138.2	138.2
25	E8 T0__Pax7_Dll4_GFP 027.nd2	533.92	324.02	209.9	209.9		2270.16	2229.11	41.05	41.05
26	E8 T0__Pax7_Dll4_GFP 028.nd2	385.66	247.6	138.06	138.06		1802.79	1524.58	278.21	278.21
27	E8 T0__Pax7_Dll4_GFP 029.nd2	458.77	224.51	234.26	234.26		1429.28	1071.82	357.46	357.46
28	E8 T0__Pax7_Dll4_GFP 030.nd2	622.05	357.56	264.49	264.49		1824.5	1526.34	298.16	298.16
29	E8 T0__Pax7_Dll4_GFP 031.nd2	626.44	347.03	279.41	279.41		1888.07	1685.42	202.65	202.65
30	E8 T0__Pax7_Dll4_GFP 032.nd2	339.99	237.71	102.28	102.28		2047.44	1987.84	59.6	59.6
31	E8 T0__Pax7_Dll4_GFP 033.nd2	273.34	189.89	83.45	83.45		1551.99	1298.16	253.83	253.83
32	E8 T0__Pax7_Dll4_GFP 034.nd2	249.03	169.43	79.6	79.6		1446.83	1104.2	342.63	342.63
33	E8 T0__Pax7_Dll4_GFP 035.nd2	734.96	306.71	428.25	428.25		1348.15	1160.56	187.59	187.59
34	E8 T0__Pax7_Dll4_GFP 036.nd2	462.23	261.14	201.09	201.09		928.56	1244.33	-315.77	0
35	E8 T0__Pax7_Dll4_GFP 037.nd2	643.55	290.42	353.13	353.13		1047.02	1207.05	-160.03	0
36	E8 T0__Pax7_Dll4_GFP 038.nd2	462.57	259.04	203.53	203.53		1284.59	1089.31	195.28	195.28
37	E8 T0__Pax7_Dll4_GFP 039.nd2	591.74	195.44	396.3	396.3		940.04	699.5	240.54	240.54
38	E8 T0__Pax7_Dll4_GFP 040.nd2	680.88	392.99	287.89	287.89		2549.73	2256.16	293.57	293.57
39	E8 T0__Pax7_Dll4_GFP 041.nd2	746.13	345.75	400.38	400.38		2268.35	2032.49	235.86	235.86
40	E8 T0__Pax7_Dll4_GFP 042.nd2	487.55	339.13	148.42	148.42		1732.64	1459.3	273.34	273.34
41	E8 T0__Pax7_Dll4_GFP 044.nd2	356.22	285.3	70.92	70.92		875.62	1037.5	-161.88	0
42	E8 T0__Pax7_Dll4_GFP 045.nd2	430.82	191.37	239.45	239.45		930.89	798.54	132.35	132.35
43	E8 T0__Pax7_Dll4_GFP 046.nd2	644.21	420.84	223.37	223.37		1805.16	1910.98	-105.82	0
44	E8 T0__Pax7_Dll4_GFP 047.nd2	436.41	306.42	129.99	129.99		1676	1542.77	133.23	133.23
45	E8 T0__Pax7_Dll4_GFP 048.nd2	618.51	343.83	274.68	274.68		1300.66	1215.09	85.57	85.57
46	E8 T0__Pax7_Dll4_GFP 049.nd2	729.88	399.93	329.95	329.95		1918.2	2038.78	-120.58	0
47	E8 T0__Pax7_Dll4_GFP 051.nd2	417.03	249.65	167.38	167.38		1134.56	966.42	168.14	168.14
48	E8 T0__Pax7_Dll4_GFP 052.nd2	662.91	428.14	234.77	234.77		2418.78	2293.3	125.48	125.48
49	E8 T0__Pax7_Dll4_GFP 053.nd2	480.2	314	166.2	166.2		1311.6	1266.27	45.33	45.33
50	E8 T0__Pax7_Dll4_GFP 054.nd2	640.27	375.47	264.8	264.8		1645.36	1419.75	225.61	225.61
51	E8 T0__Pax7_Dll4_GFP 056.nd2	273.45	243.48	29.97	29.97		1271.09	1185.08	86.01	86.01
52	E8 T0__Pax7_Dll4_GFP 057.nd2	937.48	595.04	342.44	342.44		723.62	2248.6	-1524.98	0
53	E8 T0__Pax7_Dll4_GFP 058.nd2	552.31	276.22	276.09	276.09		1658.37	1611.18	47.19	47.19
54	E8 T0__Pax7_Dll4_GFP 059.nd2	665.7	329.3	336.4	336.4		1490	1180.11	309.89	309.89
55	E8 T0__Pax7_Dll4_GFP 060.nd2	551.39	346.12	205.27	205.27		1939.04	1970.86	-31.82	0
56	E8 T0__Pax7_Dll4_GFP 061.nd2	652	351.49	300.51	300.51		1913.01	1761.98	151.03	151.03
57	E8 T0__Pax7_Dll4_GFP 063.nd2	412.37	249.83	162.54	162.54		1138.75	1107.34	31.41	31.41
58	E8 T0__Pax7_Dll4_GFP 064.nd2	570.2	319.2	251	251		1540.6	1482.8	57.8	57.8
59	E8 T0__Pax7_Dll4_GFP 066.nd2	548.67	297.8	250.87	250.87		1328.73	1322.84	5.89	5.89
60	E8 T0__Pax7_Dll4_GFP 067.nd2	309.13	204.97	104.16	104.16		629.18	862.1	-232.92	0
61	E8 T0__Pax7_Dll4_GFP 068.nd2	616.74	286.58	330.16	330.16		1168.07	1221.71	-53.64	0
62	E8 T0__Pax7_Dll4_GFP 069.nd2	534.7	368.2	166.5	166.5		1359.73	1181.22	178.51	178.51
63	E8 T0__Pax7_Dll4_GFP 070.nd2	476.64	363.43	113.21	113.21		1751.27	1427.96	323.31	323.31
64	E8 T0__Pax7_Dll4_GFP 071.nd2	507.05	272.6	234.45	234.45		1385.14	1315.36	69.78	69.78
65	E8 T0__Pax7_Dll4_GFP 074.nd2	682.05	359.15	322.9	322.9		1713.13	1547.22	165.91	165.91
66	E8 T0__Pax7_Dll4_GFP 075.nd2	694.66	311.16	383.5	383.5		1028.58	1018.68	9.9	9.9
