# Supplementary material for: Heterogeneous levels of delta-like 4 within a multinucleated niche cell maintains muscle stem cell diversity
Source: eLife. 2022 Dec 30;11:e68180. doi: 10.7554/eLife.68180 (PMC9803355; doi:10.7554/eLife.68180)
Supplement: Figure 1—source data 5. [file elife-68180-fig1-data5.xlsx]

## Sheet: GFP hi_mouse1
					Dll4 mean intensity						Pax7nGFP mean intensity
Item	Source	Dll4 (TxRed) mean intensity	TxRed background	Dll4 mean intensity	Corrected minus to zeros			Pax7nGFP (GFP) mean intensity	GFP background	Pax7nGFP mean intensity	Corrected minus to zeros
1	GFP hi_mouse1_GFP_Dll4_001.nd2	1665.08	1067.44	597.64	597.64			1659.74	1394.39	265.353	265.353
2	GFP hi_mouse1_GFP_Dll4_001.nd2	1927.55		860.11	860.11			1613.18		218.793	218.793
3	GFP hi_mouse1_GFP_Dll4_001.nd2	1476.4		408.96	408.96			1609.62		215.233	215.233
4	GFP hi_mouse1_GFP_Dll4_002.nd2	2169.26	1050.19	1119.07	1119.07			1695.79	1387.13	308.657	308.657
5	GFP hi_mouse1_GFP_Dll4_002.nd2	1691.2		641.007	641.007			1627.01		239.877	239.877
6	GFP hi_mouse1_GFP_Dll4_003.nd2	1640		621.43	621.43			1634.4		206.59	206.59
7	GFP hi_mouse1_GFP_Dll4_004.nd2	1860.93	1158.44	702.49	702.49			2059.19	1731.59	327.6	327.6
8	GFP hi_mouse1_GFP_Dll4_004.nd2	2162.57		1004.13	1004.13			1999.22		267.63	267.63
9	GFP hi_mouse1_GFP_Dll4_004.nd2	2097.55		939.11	939.11			2037.71		306.12	306.12
10	GFP hi_mouse1_GFP_Dll4_005.nd2	2054.33	982.157	1072.17	1072.17			1787.03	1332.26	454.773	454.773
11	GFP hi_mouse1_GFP_Dll4_005.nd2	1985.26		1003.1	1003.1			1757.93		425.673	425.673
12	GFP hi_mouse1_GFP_Dll4_005.nd2	1502.79		520.633	520.633			1658.01		325.753	325.753
13	GFP hi_mouse1_GFP_Dll4_005.nd2	1562.15		579.993	579.993			1584.8		252.543	252.543
14	GFP hi_mouse1_GFP_Dll4_005.nd2	1636.28		654.123	654.123			1608.5		276.243	276.243
15	GFP hi_mouse1_GFP_Dll4_005.nd2	1839.28		857.123	857.123			1670.91		338.653	338.653
16	GFP hi_mouse1_GFP_Dll4_005.nd2	1545.61		563.453	563.453			1589.95		257.693	257.693
17	GFP hi_mouse1_GFP_Dll4_005.nd2	2107.21		1125.05	1125.05			1623.18		290.923	290.923
18	GFP hi_mouse1_GFP_Dll4_005.nd2	1306.43		324.273	324.273			1575.04		242.783	242.783
19	GFP hi_mouse1_GFP_Dll4_005.nd2	1834.95		852.793	852.793			1614.12		281.863	281.863
20	GFP hi_mouse1_GFP_Dll4_006.nd2	1405.3	1066.45	338.85	338.85			1699.49	1447.2	252.287	252.287
21	GFP hi_mouse1_GFP_Dll4_006.nd2	1672.54		606.09	606.09			1723.29		276.087	276.087
22	GFP hi_mouse1_GFP_Dll4_006.nd2	1449.38		382.93	382.93			1758.19		310.987	310.987
23	GFP hi_mouse1_GFP_Dll4_006.nd2	1285.62		219.17	219.17			1657.69		210.487	210.487
24	GFP hi_mouse1_GFP_Dll4_006.nd2	1789.57		723.12	723.12			1649.52		202.317	202.317
25	GFP hi_mouse1_GFP_Dll4_006.nd2	1249.68		183.23	183.23			1655.95		208.747	208.747
26	GFP hi_mouse1_GFP_Dll4_006.nd2	1754.98		688.53	688.53			1785.94		338.737	338.737
27	GFP hi_mouse1_GFP_Dll4_007.nd2	2031.01	1105.74	925.273	925.273			1954.01	1588.09	365.917	365.917
28	GFP hi_mouse1_GFP_Dll4_007.nd2	1648.59		542.853	542.853			1791.46		203.367	203.367
29	GFP hi_mouse1_GFP_Dll4_008.nd2	1671.63	1059.06	612.573	612.573			1619.69	1354.63	265.057	265.057
30	GFP hi_mouse1_GFP_Dll4_008.nd2	1939.68		880.623	880.623			1661.2		306.567	306.567
31	GFP hi_mouse1_GFP_Dll4_008.nd2	1709.7		650.643	650.643			1729.01		374.377	374.377
32	GFP hi_mouse1_GFP_Dll4_008.nd2	2061		1001.94	1001.94			1815.56		460.927	460.927
33	GFP hi_mouse1_GFP_Dll4_009.nd2	1650.95	981.06	669.89	669.89			1365.36	1115.38	249.983	249.983
34	GFP hi_mouse1_GFP_Dll4_009.nd2	1950.65		969.59	969.59			1347.12		231.743	231.743
35	GFP hi_mouse1_GFP_Dll4_010.nd2	1141.18		227.583	227.583			1274.28		216.497	216.497
36	GFP hi_mouse1_GFP_Dll4_010.nd2	1672.77		759.173	759.173			1258.49		200.707	200.707
37	GFP hi_mouse1_GFP_Dll4_011.nd2	1230.62	896.277	334.343	334.343			1173.23	932.92	240.31	240.31
38	GFP hi_mouse1_GFP_Dll4_011.nd2	1556.6		660.323	660.323			1148.13		215.21	215.21
39	GFP hi_mouse1_GFP_Dll4_011.nd2	1430.49		534.213	534.213			1186.88		253.96	253.96
40	GFP hi_mouse1_GFP_Dll4_011.nd2	1796.85		900.573	900.573			1158.68		225.76	225.76
41	GFP hi_mouse1_GFP_Dll4_012.nd2	1462.49	1006.03	456.457	456.457			1553.63	1262.66	290.967	290.967
42	GFP hi_mouse1_GFP_Dll4_012.nd2	1344.37		338.337	338.337			1481.48		218.817	218.817
43	GFP hi_mouse1_GFP_Dll4_012.nd2	1511.73		505.697	505.697			1473.24		210.577	210.577
44	GFP hi_mouse1_GFP_Dll4_012.nd2	1510.34		504.307	504.307			1489.61		226.947	226.947
45	GFP hi_mouse1_GFP_Dll4_013.nd2	1534.79	1000.11	534.677	534.677			1478.77	1211.89	266.88	266.88
46	GFP hi_mouse1_GFP_Dll4_013.nd2	2014.34		1014.23	1014.23			1440.45		228.56	228.56
47	GFP hi_mouse1_GFP_Dll4_013.nd2	1541		540.887	540.887			1450.33		238.44	238.44
48	GFP hi_mouse1_GFP_Dll4_013.nd2	1848.58		848.467	848.467			1423.29		211.4	211.4
49	GFP hi_mouse1_GFP_Dll4_013.nd2	1956.77		956.657	956.657			1429.11		217.22	217.22
50	GFP hi_mouse1_GFP_Dll4_013.nd2	1696.02		695.907	695.907			1532.17		320.28	320.28
51	GFP hi_mouse1_GFP_Dll4_013.nd2	1938.78		938.667	938.667			1500.22		288.33	288.33
52	GFP hi_mouse1_GFP_Dll4_013.nd2	1594.85		594.737	594.737			1479.46		267.57	267.57
53	GFP hi_mouse1_GFP_Dll4_014.nd2	1697.83	1014.24	683.59	683.59			1426.31	1145.79	280.523	280.523
54	GFP hi_mouse1_GFP_Dll4_015.nd2	1691.21	1049.55	641.657	641.657			1532.57	1191.49	341.08	341.08
55	GFP hi_mouse1_GFP_Dll4_015.nd2	1528.35		478.797	478.797			1418.4		226.91	226.91
56	GFP hi_mouse1_GFP_Dll4_015.nd2	1666.12		616.567	616.567			1443.8		252.31	252.31
57	GFP hi_mouse1_GFP_Dll4_015.nd2	1973.78		924.227	924.227			1454.75		263.26	263.26
58	GFP hi_mouse1_GFP_Dll4_015.nd2	1794.86		745.307	745.307			1505.05		313.56	313.56
59	GFP hi_mouse1_GFP_Dll4_015.nd2	1785.01		735.457	735.457			1415.34		223.85	223.85
60	GFP hi_mouse1_GFP_Dll4_015.nd2	1688.41		638.857	638.857			1423.09		231.6	231.6
61	GFP hi_mouse1_GFP_Dll4_016.nd2	1912.16	1101.49	810.67	810.67			1586.62	1255.05	331.57	331.57
62	GFP hi_mouse1_GFP_Dll4_016.nd2	1778.9		677.41	677.41			1609.95		354.9	354.9
63	GFP hi_mouse1_GFP_Dll4_016.nd2	1778.3		676.81	676.81			1512.37		257.32	257.32
64	GFP hi_mouse1_GFP_Dll4_016.nd2	1259.09		157.6	157.6			1510.88		255.83	255.83
65	GFP hi_mouse1_GFP_Dll4_017.nd2	2166.17	1123.12	1043.05	1043.05			1685.19	1354.42	330.773	330.773
66	GFP hi_mouse1_GFP_Dll4_017.nd2	2072.39		949.267	949.267			1676.41		321.993	321.993
67	GFP hi_mouse1_GFP_Dll4_017.nd2	1947.82		824.697	824.697			1710.9		356.483	356.483
68	GFP hi_mouse1_GFP_Dll4_018.nd2	1609.65	1122.67	486.977	486.977			1646.85	1346.19	300.66	300.66
69	GFP hi_mouse1_GFP_Dll4_018.nd2	1825.27		702.597	702.597			1558.44		212.25	212.25
70	GFP hi_mouse1_GFP_Dll4_018.nd2	1367.33		244.657	244.657			1598.88		252.69	252.69
71	GFP hi_mouse1_GFP_Dll4_018.nd2	1794.48		671.807	671.807			1548.84		202.65	202.65
72	GFP hi_mouse1_GFP_Dll4_019.nd2	1992.73	1085.92	906.813	906.813			1443.61	1179.83	263.78	263.78
73	GFP hi_mouse1_GFP_Dll4_019.nd2	1756.66		670.743	670.743			1439.55		259.72	259.72
74	GFP hi_mouse1_GFP_Dll4_019.nd2	1965.86		879.943	879.943			1433.17		253.34	253.34
75	GFP hi_mouse1_GFP_Dll4_019.nd2	1642.29		556.373	556.373			1386.37		206.54	206.54
76	GFP hi_mouse1_GFP_Dll4_019.nd2	1570.29		484.373	484.373			1390.96		211.13	211.13
77	GFP hi_mouse1_GFP_Dll4_019.nd2	1651.99		566.073	566.073			1408.93		229.1	229.1
78	GFP hi_mouse1_GFP_Dll4_020.nd2	1761.83		697.717	697.717			1308.47		251.43	251.43
79	GFP hi_mouse1_GFP_Dll4_021.nd2	1666.99	1102.72	564.27	564.27			1524.93	1236.82	288.107	288.107
80	GFP hi_mouse1_GFP_Dll4_021.nd2	2031.95		929.23	929.23			1450.07		213.247	213.247
81	GFP hi_mouse1_GFP_Dll4_021.nd2	1827.53		724.81	724.81			1484.44		247.617	247.617
82	GFP hi_mouse1_GFP_Dll4_021.nd2	1441.77		339.05	339.05			1488.32		251.497	251.497
83	GFP hi_mouse1_GFP_Dll4_022.nd2	1750.34		645.763	645.763			1497.45		204.303	204.303
84	GFP hi_mouse1_GFP_Dll4_023.nd2	1506.84	964.25	542.59	542.59			1834.87	1589.42	245.45	245.45
85	GFP hi_mouse1_GFP_Dll4_024.nd2	2125.39	1110.08	1015.31	1015.31			1956.93	1608.16	348.773	348.773
86	GFP hi_mouse1_GFP_Dll4_024.nd2	2119.61		1009.53	1009.53			1948.14		339.983	339.983
87	GFP hi_mouse1_GFP_Dll4_024.nd2	1661.94		551.863	551.863			1857.37		249.213	249.213
88	GFP hi_mouse1_GFP_Dll4_024.nd2	2034.03		923.953	923.953			1908.07		299.913	299.913
89	GFP hi_mouse1_GFP_Dll4_024.nd2	2020.06		909.983	909.983			1938.59		330.433	330.433
90	GFP hi_mouse1_GFP_Dll4_024.nd2	1871.77		761.693	761.693			1813.11		204.953	204.953
91	GFP hi_mouse1_GFP_Dll4_025.nd2	1512.55	1090.78	421.767	421.767			1945.08	1555.67	389.407	389.407
92	GFP hi_mouse1_GFP_Dll4_025.nd2	2025.59		934.807	934.807			1883.87		328.197	328.197
93	GFP hi_mouse1_GFP_Dll4_025.nd2	2169.06		1078.28	1078.28			1891.91		336.237	336.237
94	GFP hi_mouse1_GFP_Dll4_025.nd2	1541.61		450.827	450.827			1859.33		303.657	303.657
95	GFP hi_mouse1_GFP_Dll4_025.nd2	1861.5		770.717	770.717			1807.29		251.617	251.617
96	GFP hi_mouse1_GFP_Dll4_025.nd2	1796.61		705.827	705.827			1825.45		269.777	269.777
97	GFP hi_mouse1_GFP_Dll4_025.nd2	1394.35		303.567	303.567			1761.3		205.627	205.627

## Sheet: GFP med_mouse1
					Dll4 mean intensity						Pax7nGFP mean intensity
Item	Source	Dll4 (TxRed) mean intensity	TxRed background	Dll4 mean intensity	Corrected minus to zeros			Pax7nGFP (GFP) mean intensity	GFP background	Pax7nGFP mean intensity	Corrected minus to zeros
1	GFP med_mouse1_GFP_Dll4_001.nd2	1566.57	992.31	574.26	574.26			1597.99	1372.17	225.823	225.823
2	GFP med_mouse1_GFP_Dll4_001.nd2	1714.35		722.04	722.04			1632.04		259.873	259.873
3	GFP med_mouse1_GFP_Dll4_001.nd2	1414.57		422.26	422.26			1498.76		126.593	126.593
4	GFP med_mouse1_GFP_Dll4_001.nd2	1395.46		403.15	403.15			1556.55		184.383	184.383
5	GFP med_mouse1_GFP_Dll4_001.nd2	1541.49		549.18	549.18			1488.34		116.173	116.173
6	GFP med_mouse1_GFP_Dll4_002.nd2	1447.73		469.17	469.17			1405.89		129.417	129.417
7	GFP med_mouse1_GFP_Dll4_002.nd2	1607.33		628.77	628.77			1482.53		206.057	206.057
8	GFP med_mouse1_GFP_Dll4_002.nd2	1230.89		252.33	252.33			1393.23		116.757	116.757
9	GFP med_mouse1_GFP_Dll4_002.nd2	1059.76		81.2	81.2			1414.06		137.587	137.587
10	GFP med_mouse1_GFP_Dll4_003.nd2	1399.58	977.407	422.173	422.173			1729.05	1417.25	311.803	311.803
11	GFP med_mouse1_GFP_Dll4_003.nd2	1244.17		266.763	266.763			1539.81		122.563	122.563
12	GFP med_mouse1_GFP_Dll4_003.nd2	1587.45		610.043	610.043			1694.75		277.503	277.503
13	GFP med_mouse1_GFP_Dll4_003.nd2	1527.86		550.453	550.453			1646.2		228.953	228.953
14	GFP med_mouse1_GFP_Dll4_003.nd2	1731.83		754.423	754.423			1620.34		203.093	203.093
15	GFP med_mouse1_GFP_Dll4_003.nd2	1743.64		766.233	766.233			1586.15		168.903	168.903
16	GFP med_mouse1_GFP_Dll4_003.nd2	1229.79		252.383	252.383			1525.96		108.713	108.713
17	GFP med_mouse1_GFP_Dll4_003.nd2	1546.02		568.613	568.613			1611.55		194.303	194.303
18	GFP med_mouse1_GFP_Dll4_004.nd2	1633.5	1002.67	630.827	630.827			1738.09	1540.11	197.98	197.98
19	GFP med_mouse1_GFP_Dll4_004.nd2	1241.05		238.377	238.377			1653.84		113.73	113.73
20	GFP med_mouse1_GFP_Dll4_004.nd2	1644.68		642.007	642.007			1676.75		136.64	136.64
21	GFP med_mouse1_GFP_Dll4_004.nd2	1409.19		406.517	406.517			1772.2		232.09	232.09
22	GFP med_mouse1_GFP_Dll4_005.nd2	1847.66	985.467	862.193	862.193			1575.31	1425.37	149.94	149.94
23	GFP med_mouse1_GFP_Dll4_005.nd2	1700.36		714.893	714.893			1766.21		340.84	340.84
24	GFP med_mouse1_GFP_Dll4_005.nd2	1943.93		958.463	958.463			1692.12		266.75	266.75
25	GFP med_mouse1_GFP_Dll4_005.nd2	1698.27		712.803	712.803			1549.56		124.19	124.19
26	GFP med_mouse1_GFP_Dll4_005.nd2	1652.24		666.773	666.773			1630.12		204.75	204.75
27	GFP med_mouse1_GFP_Dll4_005.nd2	1501.82		516.353	516.353			1631.39		206.02	206.02
28	GFP med_mouse1_GFP_Dll4_005.nd2	1820.39		834.923	834.923			1655.23		229.86	229.86
29	GFP med_mouse1_GFP_Dll4_005.nd2	1539.26		553.793	553.793			1553.13		127.76	127.76
30	GFP med_mouse1_GFP_Dll4_005.nd2	1310.37		324.903	324.903			1560.13		134.76	134.76
31	GFP med_mouse1_GFP_Dll4_005.nd2	1497.15		511.683	511.683			1557.99		132.62	132.62
32	GFP med_mouse1_GFP_Dll4_006.nd2	1623.61	971.04	652.57	652.57			1647.1	1471.62	175.483	175.483
33	GFP med_mouse1_GFP_Dll4_006.nd2	1356.53		385.49	385.49			1579.02		107.403	107.403
34	GFP med_mouse1_GFP_Dll4_006.nd2	1621.47		650.43	650.43			1652.86		181.243	181.243
35	GFP med_mouse1_GFP_Dll4_007.nd2	1331.02		354.353	354.353			1592.71		154.147	154.147
36	GFP med_mouse1_GFP_Dll4_007.nd2	1393.11		416.443	416.443			1597.5		158.937	158.937
37	GFP med_mouse1_GFP_Dll4_007.nd2	1215.2		238.533	238.533			1630.3		191.737	191.737
38	GFP med_mouse1_GFP_Dll4_009.nd2	1446.5	956.463	490.037	490.037			1827.13	1684.62	142.513	142.513
39	GFP med_mouse1_GFP_Dll4_009.nd2	1168.59		212.127	212.127			1867.57		182.953	182.953
40	GFP med_mouse1_GFP_Dll4_009.nd2	1592.87		636.407	636.407			1887.13		202.513	202.513
41	GFP med_mouse1_GFP_Dll4_009.nd2	1406.53		450.067	450.067			1908.63		224.013	224.013
42	GFP med_mouse1_GFP_Dll4_009.nd2	1558.59		602.127	602.127			1923.5		238.883	238.883
43	GFP med_mouse1_GFP_Dll4_009.nd2	1332.72		376.257	376.257			1894		209.383	209.383
44	GFP med_mouse1_GFP_Dll4_009.nd2	1609.11		652.647	652.647			1840.12		155.503	155.503
45	GFP med_mouse1_GFP_Dll4_009.nd2	1590.99		634.527	634.527			1865.66		181.043	181.043
46	GFP med_mouse1_GFP_Dll4_009.nd2	1584.34		627.877	627.877			1877.18		192.563	192.563
47	GFP med_mouse1_GFP_Dll4_010.nd2	1849.95	1063.09	786.86	786.86			1973.89	1667.22	306.673	306.673
48	GFP med_mouse1_GFP_Dll4_010.nd2	1780.91		717.82	717.82			1874.37		207.153	207.153
49	GFP med_mouse1_GFP_Dll4_010.nd2	1538.41		475.32	475.32			1870.92		203.703	203.703
50	GFP med_mouse1_GFP_Dll4_010.nd2	1627.55		564.46	564.46			1865.12		197.903	197.903
51	GFP med_mouse1_GFP_Dll4_010.nd2	1650.84		587.75	587.75			1830.29		163.073	163.073
52	GFP med_mouse1_GFP_Dll4_010.nd2	1714.76		651.67	651.67			1800.94		133.723	133.723
53	GFP med_mouse1_GFP_Dll4_010.nd2	1675.65		612.56	612.56			1781.94		114.723	114.723
54	GFP med_mouse1_GFP_Dll4_010.nd2	1399.01		335.92	335.92			1846.54		179.323	179.323
55	GFP med_mouse1_GFP_Dll4_010.nd2	1402.56		339.47	339.47			1889.74		222.523	222.523
56	GFP med_mouse1_GFP_Dll4_010.nd2	1611.77		548.68	548.68			1883.65		216.433	216.433
57	GFP med_mouse1_GFP_Dll4_011.nd2	1463.45	987.09	476.36	476.36			1843.89	1735.29	108.597	108.597
58	GFP med_mouse1_GFP_Dll4_011.nd2	1538.98		551.89	551.89			1901.04		165.747	165.747
59	GFP med_mouse1_GFP_Dll4_012.nd2	1332.54	920.267	412.273	412.273			1636.76	1376.37	260.39	260.39
60	GFP med_mouse1_GFP_Dll4_012.nd2	1464.36		544.093	544.093			1556.84		180.47	180.47
61	GFP med_mouse1_GFP_Dll4_012.nd2	1263.5		343.233	343.233			1552.59		176.22	176.22
62	GFP med_mouse1_GFP_Dll4_012.nd2	1340.57		420.303	420.303			1550.96		174.59	174.59
63	GFP med_mouse1_GFP_Dll4_012.nd2	1418.91		498.643	498.643			1651.84		275.47	275.47
64	GFP med_mouse1_GFP_Dll4_012.nd2	1472.39		552.123	552.123			1624.93		248.56	248.56
65	GFP med_mouse1_GFP_Dll4_013.nd2	1297.4	900.237	397.163	397.163			1561.8	1400.6	161.197	161.197
66	GFP med_mouse1_GFP_Dll4_013.nd2	1144		243.763	243.763			1589.11		188.507	188.507
67	GFP med_mouse1_GFP_Dll4_013.nd2	1297.77		397.533	397.533			1502.03		101.427	101.427
68	GFP med_mouse1_GFP_Dll4_013.nd2	1383.69		483.453	483.453			1566.83		166.227	166.227
69	GFP med_mouse1_GFP_Dll4_013.nd2	1283		382.763	382.763			1672.55		271.947	271.947
70	GFP med_mouse1_GFP_Dll4_013.nd2	1324.88		424.643	424.643			1539.51		138.907	138.907
71	GFP med_mouse1_GFP_Dll4_013.nd2	1317.19		416.953	416.953			1509.34		108.737	108.737
72	GFP med_mouse1_GFP_Dll4_014.nd2	1039.66	831.707	207.953	207.953			1583.8	1338.83	244.973	244.973
73	GFP med_mouse1_GFP_Dll4_014.nd2	1126.13		294.423	294.423			1615.7		276.873	276.873
74	GFP med_mouse1_GFP_Dll4_014.nd2	1178.92		347.213	347.213			1441.64		102.813	102.813
75	GFP med_mouse1_GFP_Dll4_014.nd2	1359.15		527.443	527.443			1459.49		120.663	120.663
76	GFP med_mouse1_GFP_Dll4_014.nd2	1481.6		649.893	649.893			1463.05		124.223	124.223
77	GFP med_mouse1_GFP_Dll4_014.nd2	1270.04		438.333	438.333			1515.8		176.973	176.973
78	GFP med_mouse1_GFP_Dll4_014.nd2	1494.47		662.763	662.763			1441.81		102.983	102.983
79	GFP med_mouse1_GFP_Dll4_014.nd2	1330.95		499.243	499.243			1484.47		145.643	145.643
80	GFP med_mouse1_GFP_Dll4_015.nd2	1158.13	987.567	170.563	170.563			1887.11	1739.89	147.22	147.22
81	GFP med_mouse1_GFP_Dll4_015.nd2	1431.22		443.653	443.653			1852.32		112.43	112.43
82	GFP med_mouse1_GFP_Dll4_015.nd2	1497.24		509.673	509.673			1969.63		229.74	229.74
83	GFP med_mouse1_GFP_Dll4_016.nd2	1455.44	863.77	591.67	591.67			1570.86	1462.24	108.62	108.62
84	GFP med_mouse1_GFP_Dll4_016.nd2	986.81		123.04	123.04			1681.17		218.93	218.93
85	GFP med_mouse1_GFP_Dll4_016.nd2	1188.97		325.2	325.2			1599.03		136.79	136.79
86	GFP med_mouse1_GFP_Dll4_016.nd2	1187.13		323.36	323.36			1595.66		133.42	133.42
87	GFP med_mouse1_GFP_Dll4_016.nd2	1284.05		420.28	420.28			1630.48		168.24	168.24
88	GFP med_mouse1_GFP_Dll4_017.nd2	1588.74	913.063	675.677	675.677			1622.91	1407.98	214.93	214.93
89	GFP med_mouse1_GFP_Dll4_017.nd2	1327.99		414.927	414.927			1673.42		265.44	265.44
90	GFP med_mouse1_GFP_Dll4_017.nd2	1521.16		608.097	608.097			1659.5		251.52	251.52
91	GFP med_mouse1_GFP_Dll4_017.nd2	1357.23		444.167	444.167			1682.2		274.22	274.22
92	GFP med_mouse1_GFP_Dll4_017.nd2	1160.68		247.617	247.617			1560.87		152.89	152.89
93	GFP med_mouse1_GFP_Dll4_017.nd2	1824.13		911.067	911.067			1560.19		152.21	152.21
94	GFP med_mouse1_GFP_Dll4_017.nd2	1416.2		503.137	503.137			1515.02		107.04	107.04
95	GFP med_mouse1_GFP_Dll4_017.nd2	1328.47		415.407	415.407			1594.38		186.4	186.4
96	GFP med_mouse1_GFP_Dll4_017.nd2	1211		297.937	297.937			1591.42		183.44	183.44
97	GFP med_mouse1_GFP_Dll4_017.nd2	1451.73		538.667	538.667			1537.78		129.8	129.8
98	GFP med_mouse1_GFP_Dll4_017.nd2	1386.26		473.197	473.197			1521.78		113.8	113.8
99	GFP med_mouse1_GFP_Dll4_018.nd2	1656.31	986.653	669.657	669.657			1915.72	1684.85	230.87	230.87
100	GFP med_mouse1_GFP_Dll4_018.nd2	1761.55		774.897	774.897			1873.12		188.27	188.27
101	GFP med_mouse1_GFP_Dll4_018.nd2	1567.77		581.117	581.117			1819.07		134.22	134.22
102	GFP med_mouse1_GFP_Dll4_019.nd2	1657.61		680.353	680.353			1970.57		207.263	207.263
103	GFP med_mouse1_GFP_Dll4_019.nd2	1510.24		532.983	532.983			1914.83		151.523	151.523
104	GFP med_mouse1_GFP_Dll4_019.nd2	1720.3		743.043	743.043			2008.54		245.233	245.233
105	GFP med_mouse1_GFP_Dll4_019.nd2	1610.58		633.323	633.323			1976.6		213.293	213.293
106	GFP med_mouse1_GFP_Dll4_020.nd2	1470.93	963.47	507.46	507.46			2108.49	1834.53	273.963	273.963
107	GFP med_mouse1_GFP_Dll4_020.nd2	1500.76		537.29	537.29			2049.33		214.803	214.803
108	GFP med_mouse1_GFP_Dll4_020.nd2	1533.2		569.73	569.73			1964.35		129.823	129.823
109	GFP med_mouse1_GFP_Dll4_020.nd2	1594.85		631.38	631.38			1944.34		109.813	109.813
110	GFP med_mouse1_GFP_Dll4_020.nd2	1337.35		373.88	373.88			1966.33		131.803	131.803
111	GFP med_mouse1_GFP_Dll4_020.nd2	1332.62		369.15	369.15			1944.3		109.773	109.773
112	GFP med_mouse1_GFP_Dll4_021.nd2	1112.39	917.443	194.947	194.947			1922.18	1808.17	114.01	114.01
113	GFP med_mouse1_GFP_Dll4_021.nd2	1521.6		604.157	604.157			1949.35		141.18	141.18
114	GFP med_mouse1_GFP_Dll4_021.nd2	1232.3		314.857	314.857			2038.97		230.8	230.8
115	GFP med_mouse1_GFP_Dll4_021.nd2	1586.88		669.437	669.437			2028.58		220.41	220.41
116	GFP med_mouse1_GFP_Dll4_021.nd2	1250.63		333.187	333.187			1981.44		173.27	173.27
117	GFP med_mouse1_GFP_Dll4_022.nd2	1578.12	968.28	609.84	609.84			2162.08	1872.31	289.77	289.77
118	GFP med_mouse1_GFP_Dll4_022.nd2	1324.53		356.25	356.25			2068.63		196.32	196.32
119	GFP med_mouse1_GFP_Dll4_022.nd2	1493.96		525.68	525.68			2083.74		211.43	211.43
120	GFP med_mouse1_GFP_Dll4_022.nd2	1556.2		587.92	587.92			2019.64		147.33	147.33
121	GFP med_mouse1_GFP_Dll4_022.nd2	1438.74		470.46	470.46			2018.07		145.76	145.76
122	GFP med_mouse1_GFP_Dll4_023.nd2	1281.7	957.237	324.463	324.463			2055.69	1878.58	177.107	177.107
123	GFP med_mouse1_GFP_Dll4_023.nd2	1532.68		575.443	575.443			2062.93		184.347	184.347
124	GFP med_mouse1_GFP_Dll4_024.nd2	1580.09		579.537	579.537			2130.44		272.17	272.17
125	GFP med_mouse1_GFP_Dll4_024.nd2	1554.51		553.957	553.957			2075.78		217.51	217.51
126	GFP med_mouse1_GFP_Dll4_024.nd2	1514.98		514.427	514.427			2067.32		209.05	209.05
127	GFP med_mouse1_GFP_Dll4_025.nd2	1402.22	971.413	430.807	430.807			1746.51	1431.34	315.17	315.17
128	GFP med_mouse1_GFP_Dll4_025.nd2	1585.78		614.367	614.367			1768.77		337.43	337.43
129	GFP med_mouse1_GFP_Dll4_025.nd2	1743.16		771.747	771.747			1537.05		105.71	105.71
130	GFP med_mouse1_GFP_Dll4_025.nd2	1522.06		550.647	550.647			1634.44		203.1	203.1
131	GFP med_mouse1_GFP_Dll4_025.nd2	1179.56		208.147	208.147			1623.61		192.27	192.27
132	GFP med_mouse1_GFP_Dll4_025.nd2	1465.33		493.917	493.917			1593.84		162.5	162.5
133	GFP med_mouse1_GFP_Dll4_025.nd2	1566.7		595.287	595.287			1578.11		146.77	146.77
134	GFP med_mouse1_GFP_Dll4_025.nd2	1539.09		567.677	567.677			1590.52		159.18	159.18
135	GFP med_mouse1_GFP_Dll4_025.nd2	1185.5		214.087	214.087			1603.55		172.21	172.21
136	GFP med_mouse1_GFP_Dll4_025.nd2	1557.1		585.687	585.687			1564.32		132.98	132.98
137	GFP med_mouse1_GFP_Dll4_025.nd2	1740.87		769.457	769.457			1564.13		132.79	132.79
138	GFP med_mouse1_GFP_Dll4_025.nd2	1421.9		450.487	450.487			1591.38		160.04	160.04

## Sheet: GFP low_mouse1
					Dll4 mean intensity						Pax7nGFP mean intensity
Item	Source	Dll4 (TxRed) mean intensity	TxRed background	Dll4 mean intensity	Corrected minus to zeros			Pax7nGFP (GFP) mean intensity	GFP background	Pax7nGFP mean intensity	Corrected minus to zeros
1	GFP lo_mouse1_GFP_Dll4_001.nd2	1457.72		471.297	471.297			1505.44		70.7767	70.7767
2	GFP lo_mouse1_GFP_Dll4_001.nd2	1377.44		391.017	391.017			1445.83		11.1667	11.1667
3	GFP lo_mouse1_GFP_Dll4_001.nd2	1468.41		481.987	481.987			1350.1		-84.5633	0
4	GFP lo_mouse1_GFP_Dll4_001.nd2	1420		433.577	433.577			1456.9		22.2367	22.2367
5	GFP lo_mouse1_GFP_Dll4_001.nd2	1485.44		499.017	499.017			1483.2		48.5367	48.5367
6	GFP lo_mouse1_GFP_Dll4_001.nd2	1505.61		519.187	519.187			1280.54		-154.123	0
7	GFP lo_mouse1_GFP_Dll4_001.nd2	1464.61		478.187	478.187			1416.99		-17.6733	0
8	GFP lo_mouse1_GFP_Dll4_001.nd2	1133.12		146.697	146.697			1364.16		-70.5033	0
9	GFP lo_mouse1_GFP_Dll4_002.nd2	1418.95		388.413	388.413			1671.38		154.76	154.76
10	GFP lo_mouse1_GFP_Dll4_002.nd2	1314.09		283.553	283.553			1716.3		199.68	199.68
11	GFP lo_mouse1_GFP_Dll4_002.nd2	1303.51		272.973	272.973			1701.64		185.02	185.02
12	GFP lo_mouse1_GFP_Dll4_002.nd2	1207.82		177.283	177.283			1699.07		182.45	182.45
13	GFP lo_mouse1_GFP_Dll4_002.nd2	1496.91		466.373	466.373			1499.37		-17.25	0
14	GFP lo_mouse1_GFP_Dll4_002.nd2	1279.62		249.083	249.083			1554.59		37.97	37.97
15	GFP lo_mouse1_GFP_Dll4_002.nd2	1277.21		246.673	246.673			1407.09		-109.53	0
16	GFP lo_mouse1_GFP_Dll4_002.nd2	1010.18		-20.3567	0			1653.31		136.69	136.69
17	GFP lo_mouse1_GFP_Dll4_003.nd2	1405.28	1009.03	396.25	396.25			1711.44	1872.92	-161.477	0
18	GFP lo_mouse1_GFP_Dll4_003.nd2	1188.87		179.84	179.84			1636.45		-236.467	0
19	GFP lo_mouse1_GFP_Dll4_003.nd2	1399.71		390.68	390.68			1858.16		-14.7567	0
20	GFP lo_mouse1_GFP_Dll4_003.nd2	1253.53		244.5	244.5			1546.05		-326.867	0
21	GFP lo_mouse1_GFP_Dll4_003.nd2	1239.29		230.26	230.26			1853.74		-19.1767	0
22	GFP lo_mouse1_GFP_Dll4_003.nd2	1179.67		170.64	170.64			1681.82		-191.097	0
23	GFP lo_mouse1_GFP_Dll4_003.nd2	1236.33		227.3	227.3			1577.12		-295.797	0
24	GFP lo_mouse1_GFP_Dll4_003.nd2	1215.63		206.6	206.6			1623.54		-249.377	0
25	GFP lo_mouse1_GFP_Dll4_003.nd2	1375.06		366.03	366.03			1435.66		-437.257	0
26	GFP lo_mouse1_GFP_Dll4_003.nd2	1233.39		224.36	224.36			1592.67		-280.247	0
27	GFP lo_mouse1_GFP_Dll4_003.nd2	1138.02		128.99	128.99			1502.45		-370.467	0
28	GFP lo_mouse1_GFP_Dll4_003.nd2	1224		214.97	214.97			1461.59		-411.327	0
29	GFP lo_mouse1_GFP_Dll4_004.nd2	1521.78	1015.4	506.377	506.377			1661.47	1921.28	-259.807	0
30	GFP lo_mouse1_GFP_Dll4_004.nd2	1375.76		360.357	360.357			1478.19		-443.087	0
31	GFP lo_mouse1_GFP_Dll4_004.nd2	1364.86		349.457	349.457			1505.97		-415.307	0
32	GFP lo_mouse1_GFP_Dll4_004.nd2	1293.68		278.277	278.277			1503.35		-417.927	0
33	GFP lo_mouse1_GFP_Dll4_004.nd2	1198.87		183.467	183.467			1473.59		-447.687	0
34	GFP lo_mouse1_GFP_Dll4_004.nd2	1062.19		46.7867	46.7867			1500.66		-420.617	0
35	GFP lo_mouse1_GFP_Dll4_004.nd2	1526.9		511.497	511.497			1382.57		-538.707	0
36	GFP lo_mouse1_GFP_Dll4_004.nd2	1053.29		37.8867	37.8867			1490.61		-430.667	0
37	GFP lo_mouse1_GFP_Dll4_004.nd2	1083.4		67.9967	67.9967			1474.56		-446.717	0
38	GFP lo_mouse1_GFP_Dll4_004.nd2	1114.96		99.5567	99.5567			1403.34		-517.937	0
39	GFP lo_mouse1_GFP_Dll4_004.nd2	1219.88		204.477	204.477			1430		-491.277	0
40	GFP lo_mouse1_GFP_Dll4_005.nd2	1350.27		342.957	342.957			1927.08		156.137	156.137
41	GFP lo_mouse1_GFP_Dll4_005.nd2	1114.34		107.027	107.027			1886.44		115.497	115.497
42	GFP lo_mouse1_GFP_Dll4_005.nd2	1108.8		101.487	101.487			1862.17		91.2267	91.2267
43	GFP lo_mouse1_GFP_Dll4_005.nd2	1551.45		544.137	544.137			1768.47		-2.47333	0
44	GFP lo_mouse1_GFP_Dll4_005.nd2	1374.41		367.097	367.097			2034.02		263.077	263.077
45	GFP lo_mouse1_GFP_Dll4_005.nd2	932.53		-74.7833	0			1596.57		-174.373	0
46	GFP lo_mouse1_GFP_Dll4_005.nd2	1670.53		663.217	663.217			1909.63		138.687	138.687
47	GFP lo_mouse1_GFP_Dll4_005.nd2	1220.51		213.197	213.197			1871.56		100.617	100.617
48	GFP lo_mouse1_GFP_Dll4_005.nd2	1414.93		407.617	407.617			1808.65		37.7067	37.7067
49	GFP lo_mouse1_GFP_Dll4_005.nd2	1511.97		504.657	504.657			1716.53		-54.4133	0
50	GFP lo_mouse1_GFP_Dll4_005.nd2	1168.37		161.057	161.057			1876.93		105.987	105.987
51	GFP lo_mouse1_GFP_Dll4_005.nd2	1286.82		279.507	279.507			1693.97		-76.9733	0
52	GFP lo_mouse1_GFP_Dll4_006.nd2	1423.5	898.1	525.4	525.4			1946.6	1798.8	147.803	147.803
53	GFP lo_mouse1_GFP_Dll4_006.nd2	1342.27		444.17	444.17			1891.09		92.2933	92.2933
54	GFP lo_mouse1_GFP_Dll4_006.nd2	1502.52		604.42	604.42			1913.12		114.323	114.323
55	GFP lo_mouse1_GFP_Dll4_006.nd2	1484.17		586.07	586.07			1867.59		68.7933	68.7933
56	GFP lo_mouse1_GFP_Dll4_006.nd2	1506.89		608.79	608.79			1775.06		-23.7367	0
57	GFP lo_mouse1_GFP_Dll4_006.nd2	1332.2		434.1	434.1			1495.07		-303.727	0
58	GFP lo_mouse1_GFP_Dll4_006.nd2	1435.99		537.89	537.89			1830.83		32.0333	32.0333
59	GFP lo_mouse1_GFP_Dll4_006.nd2	1433.93		535.83	535.83			1757.45		-41.3467	0
60	GFP lo_mouse1_GFP_Dll4_006.nd2	1348.54		450.44	450.44			1905.93		107.133	107.133
61	GFP lo_mouse1_GFP_Dll4_006.nd2	1410.56		512.46	512.46			1886.39		87.5933	87.5933
62	GFP lo_mouse1_GFP_Dll4_006.nd2	1228.83		330.73	330.73			1806.2		7.40333	7.40333
63	GFP lo_mouse1_GFP_Dll4_006.nd2	1264.3		366.2	366.2			1832.39		33.5933	33.5933
64	GFP lo_mouse1_GFP_Dll4_006.nd2	1445.59		547.49	547.49			1692.78		-106.017	0
65	GFP lo_mouse1_GFP_Dll4_006.nd2	1152.49		254.39	254.39			1705.1		-93.6967	0
66	GFP lo_mouse1_GFP_Dll4_006.nd2	1314.63		416.53	416.53			1909.37		110.573	110.573
67	GFP lo_mouse1_GFP_Dll4_006.nd2	1480.89		582.79	582.79			1708.04		-90.7567	0
68	GFP lo_mouse1_GFP_Dll4_006.nd2	1462.6		564.5	564.5			1828.68		29.8833	29.8833
69	GFP lo_mouse1_GFP_Dll4_006.nd2	1451.58		553.48	553.48			1846.67		47.8733	47.8733
70	GFP lo_mouse1_GFP_Dll4_006.nd2	1520.04		621.94	621.94			1936.75		137.953	137.953
71	GFP lo_mouse1_GFP_Dll4_006.nd2	1589.71		691.61	691.61			1922.76		123.963	123.963
72	GFP lo_mouse1_GFP_Dll4_006.nd2	1155.73		257.63	257.63			1596.07		-202.727	0
73	GFP lo_mouse1_GFP_Dll4_006.nd2	1276.72		378.62	378.62			1739.82		-58.9767	0
74	GFP lo_mouse1_GFP_Dll4_007.nd2	1411.95	937.06	474.89	474.89			1611.49	1865.13	-253.64	0
75	GFP lo_mouse1_GFP_Dll4_007.nd2	1577.55		640.49	640.49			1676.09		-189.04	0
76	GFP lo_mouse1_GFP_Dll4_007.nd2	1293.07		356.01	356.01			1671.08		-194.05	0
77	GFP lo_mouse1_GFP_Dll4_007.nd2	1200.53		263.47	263.47			1694.54		-170.59	0
78	GFP lo_mouse1_GFP_Dll4_007.nd2	1556.03		618.97	618.97			1728.91		-136.22	0
79	GFP lo_mouse1_GFP_Dll4_007.nd2	1319.85		382.79	382.79			1682.85		-182.28	0
80	GFP lo_mouse1_GFP_Dll4_007.nd2	1415.81		478.75	478.75			1701.65		-163.48	0
81	GFP lo_mouse1_GFP_Dll4_007.nd2	1156.1		219.04	219.04			1520.11		-345.02	0
82	GFP lo_mouse1_GFP_Dll4_007.nd2	1367.62		430.56	430.56			1581.8		-283.33	0
83	GFP lo_mouse1_GFP_Dll4_007.nd2	1441.72		504.66	504.66			1616.32		-248.81	0
84	GFP lo_mouse1_GFP_Dll4_007.nd2	1425.79		488.73	488.73			1607.23		-257.9	0
85	GFP lo_mouse1_GFP_Dll4_007.nd2	1574.65		637.59	637.59			1634.69		-230.44	0
86	GFP lo_mouse1_GFP_Dll4_007.nd2	1573.94		636.88	636.88			1702.58		-162.55	0
87	GFP lo_mouse1_GFP_Dll4_007.nd2	1228.69		291.63	291.63			1375.46		-489.67	0
88	GFP lo_mouse1_GFP_Dll4_007.nd2	1035.91		98.85	98.85			1704.45		-160.68	0
89	GFP lo_mouse1_GFP_Dll4_007.nd2	1221.07		284.01	284.01			1688.24		-176.89	0
90	GFP lo_mouse1_GFP_Dll4_007.nd2	1354.28		417.22	417.22			1610.43		-254.7	0
91	GFP lo_mouse1_GFP_Dll4_007.nd2	1457.5		520.44	520.44			1604.27		-260.86	0
92	GFP lo_mouse1_GFP_Dll4_007.nd2	1461.7		524.64	524.64			1621.16		-243.97	0
93	GFP lo_mouse1_GFP_Dll4_007.nd2	996.89		59.83	59.83			1674.75		-190.38	0
94	GFP lo_mouse1_GFP_Dll4_007.nd2	1435.63		498.57	498.57			1596.04		-269.09	0
95	GFP lo_mouse1_GFP_Dll4_007.nd2	1157.88		220.82	220.82			1333.02		-532.11	0
96	GFP lo_mouse1_GFP_Dll4_007.nd2	1235.78		298.72	298.72			1387.4		-477.73	0
97	GFP lo_mouse1_GFP_Dll4_008.nd2	1381.46	932.157	449.303	449.303			2055.79	1897.13	158.657	158.657
98	GFP lo_mouse1_GFP_Dll4_008.nd2	1519.89		587.733	587.733			2026.72		129.587	129.587
99	GFP lo_mouse1_GFP_Dll4_008.nd2	1359.7		427.543	427.543			1834.21		-62.9233	0
100	GFP lo_mouse1_GFP_Dll4_008.nd2	1330.67		398.513	398.513			1605.25		-291.883	0
101	GFP lo_mouse1_GFP_Dll4_008.nd2	1057.02		124.863	124.863			1762.36		-134.773	0
102	GFP lo_mouse1_GFP_Dll4_008.nd2	1432.64		500.483	500.483			1766.27		-130.863	0
103	GFP lo_mouse1_GFP_Dll4_008.nd2	1408.18		476.023	476.023			1720.28		-176.853	0
104	GFP lo_mouse1_GFP_Dll4_008.nd2	1280.22		348.063	348.063			1872.06		-25.0733	0
105	GFP lo_mouse1_GFP_Dll4_008.nd2	1087.33		155.173	155.173			1332.46		-564.673	0
106	GFP lo_mouse1_GFP_Dll4_008.nd2	1365.92		433.763	433.763			1712.83		-184.303	0
107	GFP lo_mouse1_GFP_Dll4_008.nd2	1602.3		670.143	670.143			1771.22		-125.913	0
108	GFP lo_mouse1_GFP_Dll4_008.nd2	1270.82		338.663	338.663			1675.92		-221.213	0
109	GFP lo_mouse1_GFP_Dll4_008.nd2	1404.85		472.693	472.693			1734.18		-162.953	0
110	GFP lo_mouse1_GFP_Dll4_009.nd2	1510.81	919.81	591	591			1662.77	1917.4	-254.627	0
111	GFP lo_mouse1_GFP_Dll4_009.nd2	1360.73		440.92	440.92			1703.61		-213.787	0
112	GFP lo_mouse1_GFP_Dll4_009.nd2	1365.05		445.24	445.24			1890.04		-27.3567	0
113	GFP lo_mouse1_GFP_Dll4_009.nd2	1517.88		598.07	598.07			1879.44		-37.9567	0
114	GFP lo_mouse1_GFP_Dll4_009.nd2	1497.03		577.22	577.22			1839.07		-78.3267	0
115	GFP lo_mouse1_GFP_Dll4_009.nd2	1495.87		576.06	576.06			1914.87		-2.52667	0
116	GFP lo_mouse1_GFP_Dll4_009.nd2	1358.66		438.85	438.85			1929.29		11.8933	11.8933
117	GFP lo_mouse1_GFP_Dll4_009.nd2	1317.81		398	398			1836.87		-80.5267	0
118	GFP lo_mouse1_GFP_Dll4_009.nd2	1386.02		466.21	466.21			1780.38		-137.017	0
119	GFP lo_mouse1_GFP_Dll4_009.nd2	1433.01		513.2	513.2			1758.99		-158.407	0
120	GFP lo_mouse1_GFP_Dll4_009.nd2	1237.61		317.8	317.8			1813.92		-103.477	0
121	GFP lo_mouse1_GFP_Dll4_009.nd2	1502.38		582.57	582.57			1630.34		-287.057	0
122	GFP lo_mouse1_GFP_Dll4_009.nd2	1348.14		428.33	428.33			1675.63		-241.767	0
123	GFP lo_mouse1_GFP_Dll4_010.nd2	1046.11	970.76	75.35	75.35			1731	1948.2	-217.2	0
124	GFP lo_mouse1_GFP_Dll4_010.nd2	1270.32		299.56	299.56			1949.61		1.41	1.41
125	GFP lo_mouse1_GFP_Dll4_010.nd2	1470.53		499.77	499.77			2035.48		87.28	87.28
126	GFP lo_mouse1_GFP_Dll4_010.nd2	1426.36		455.6	455.6			1636.6		-311.6	0
127	GFP lo_mouse1_GFP_Dll4_011.nd2	1413.23	1018.47	394.763	394.763			2153.78	1900.14	253.64	253.64
128	GFP lo_mouse1_GFP_Dll4_011.nd2	1570.51		552.043	552.043			1950.66		50.52	50.52
129	GFP lo_mouse1_GFP_Dll4_011.nd2	1338.59		320.123	320.123			2031.99		131.85	131.85
130	GFP lo_mouse1_GFP_Dll4_011.nd2	1715.76		697.293	697.293			2015.59		115.45	115.45
131	GFP lo_mouse1_GFP_Dll4_011.nd2	1452.65		434.183	434.183			1733.42		-166.72	0
132	GFP lo_mouse1_GFP_Dll4_011.nd2	1690.61		672.143	672.143			1819.35		-80.79	0
133	GFP lo_mouse1_GFP_Dll4_011.nd2	1335.65		317.183	317.183			1949.38		49.24	49.24
134	GFP lo_mouse1_GFP_Dll4_011.nd2	806.38		-212.087	0			1563.89		-336.25	0
135	GFP lo_mouse1_GFP_Dll4_011.nd2	1157.43		138.963	138.963			1731.97		-168.17	0
136	GFP lo_mouse1_GFP_Dll4_011.nd2	1378.18		359.713	359.713			1774.46		-125.68	0
137	GFP lo_mouse1_GFP_Dll4_011.nd2	1541.21		522.743	522.743			2044.58		144.44	144.44
138	GFP lo_mouse1_GFP_Dll4_011.nd2	1372.46		353.993	353.993			1884.7		-15.44	0
139	GFP lo_mouse1_GFP_Dll4_012.nd2	1546.58	930.173	616.407	616.407			1602.24	1928.12	-325.883	0
140	GFP lo_mouse1_GFP_Dll4_012.nd2	1512.35		582.177	582.177			1643.67		-284.453	0
141	GFP lo_mouse1_GFP_Dll4_012.nd2	1576.94		646.767	646.767			1674.23		-253.893	0
142	GFP lo_mouse1_GFP_Dll4_012.nd2	1529.01		598.837	598.837			1533.69		-394.433	0
143	GFP lo_mouse1_GFP_Dll4_012.nd2	1246.2		316.027	316.027			1541.89		-386.233	0
144	GFP lo_mouse1_GFP_Dll4_012.nd2	1587.23		657.057	657.057			1662.58		-265.543	0
145	GFP lo_mouse1_GFP_Dll4_012.nd2	1536.82		606.647	606.647			1437.58		-490.543	0
146	GFP lo_mouse1_GFP_Dll4_012.nd2	1412.52		482.347	482.347			1626.53		-301.593	0
147	GFP lo_mouse1_GFP_Dll4_012.nd2	1452.54		522.367	522.367			1734.86		-193.263	0
148	GFP lo_mouse1_GFP_Dll4_012.nd2	1281.35		351.177	351.177			1565.11		-363.013	0
149	GFP lo_mouse1_GFP_Dll4_012.nd2	1559.74		629.567	629.567			1619.96		-308.163	0
150	GFP lo_mouse1_GFP_Dll4_012.nd2	1524.58		594.407	594.407			1444.98		-483.143	0
151	GFP lo_mouse1_GFP_Dll4_012.nd2	1530.53		600.357	600.357			1552.73		-375.393	0
152	GFP lo_mouse1_GFP_Dll4_012.nd2	1512.64		582.467	582.467			1287.31		-640.813	0
153	GFP lo_mouse1_GFP_Dll4_013.nd2	1207	963.16	243.84	243.84			1900.01	1933.88	-33.8733	0
154	GFP lo_mouse1_GFP_Dll4_013.nd2	1405.03		441.87	441.87			2079.06		145.177	145.177
155	GFP lo_mouse1_GFP_Dll4_013.nd2	1535.95		572.79	572.79			1732.54		-201.343	0
156	GFP lo_mouse1_GFP_Dll4_013.nd2	1580.03		616.87	616.87			1927.71		-6.17333	0
157	GFP lo_mouse1_GFP_Dll4_013.nd2	1254.83		291.67	291.67			1950.93		17.0467	17.0467
158	GFP lo_mouse1_GFP_Dll4_013.nd2	1117.24		154.08	154.08			1930.2		-3.68333	0
159	GFP lo_mouse1_GFP_Dll4_013.nd2	1026.11		62.95	62.95			1844.4		-89.4833	0
160	GFP lo_mouse1_GFP_Dll4_013.nd2	1284.95		321.79	321.79			1684.74		-249.143	0
161	GFP lo_mouse1_GFP_Dll4_013.nd2	1149.32		186.16	186.16			1670.41		-263.473	0
162	GFP lo_mouse1_GFP_Dll4_013.nd2	1293.3		330.14	330.14			1744		-189.883	0
163	GFP lo_mouse1_GFP_Dll4_013.nd2	1137.33		174.17	174.17			1568.67		-365.213	0
164	GFP lo_mouse1_GFP_Dll4_013.nd2	1062.59		99.43	99.43			1891.99		-41.8933	0
165	GFP lo_mouse1_GFP_Dll4_013.nd2	1451.27		488.11	488.11			1761.63		-172.253	0
166	GFP lo_mouse1_GFP_Dll4_013.nd2	1349.36		386.2	386.2			1765.53		-168.353	0
167	GFP lo_mouse1_GFP_Dll4_013.nd2	1058.21		95.05	95.05			1673.03		-260.853	0
168	GFP lo_mouse1_GFP_Dll4_013.nd2	1226.57		263.41	263.41			1547.9		-385.983	0
169	GFP lo_mouse1_GFP_Dll4_014.nd2	1581.32	912.623	668.697	668.697			2127.15	1894.81	232.343	232.343
170	GFP lo_mouse1_GFP_Dll4_014.nd2	1333.93		421.307	421.307			2014.5		119.693	119.693
171	GFP lo_mouse1_GFP_Dll4_014.nd2	1185.97		273.347	273.347			1938.78		43.9733	43.9733
172	GFP lo_mouse1_GFP_Dll4_014.nd2	1281.46		368.837	368.837			1900.51		5.70333	5.70333
173	GFP lo_mouse1_GFP_Dll4_014.nd2	1264.27		351.647	351.647			1902.23		7.42333	7.42333
174	GFP lo_mouse1_GFP_Dll4_014.nd2	1204.48		291.857	291.857			1871.57		-23.2367	0
175	GFP lo_mouse1_GFP_Dll4_014.nd2	1527.23		614.607	614.607			1705.87		-188.937	0
176	GFP lo_mouse1_GFP_Dll4_014.nd2	1279.83		367.207	367.207			1968.09		73.2833	73.2833
177	GFP lo_mouse1_GFP_Dll4_014.nd2	1508.09		595.467	595.467			1935.08		40.2733	40.2733
178	GFP lo_mouse1_GFP_Dll4_014.nd2	1410.35		497.727	497.727			1733.07		-161.737	0
179	GFP lo_mouse1_GFP_Dll4_014.nd2	1505.91		593.287	593.287			1789.73		-105.077	0
180	GFP lo_mouse1_GFP_Dll4_014.nd2	1420.16		507.537	507.537			1950.03		55.2233	55.2233
181	GFP lo_mouse1_GFP_Dll4_014.nd2	1220.84		308.217	308.217			1628.26		-266.547	0
182	GFP lo_mouse1_GFP_Dll4_014.nd2	1476.34		563.717	563.717			2093.07		198.263	198.263
183	GFP lo_mouse1_GFP_Dll4_014.nd2	1468.19		555.567	555.567			2019.36		124.553	124.553
184	GFP lo_mouse1_GFP_Dll4_014.nd2	1202.24		289.617	289.617			1656.94		-237.867	0
185	GFP lo_mouse1_GFP_Dll4_014.nd2	1001.86		89.2367	89.2367			1615.22		-279.587	0
186	GFP lo_mouse1_GFP_Dll4_014.nd2	1264.32		351.697	351.697			1682.09		-212.717	0
187	GFP lo_mouse1_GFP_Dll4_014.nd2	1512.07		599.447	599.447			1760.65		-134.157	0
188	GFP lo_mouse1_GFP_Dll4_014.nd2	1279.92		367.297	367.297			1807.9		-86.9067	0
189	GFP lo_mouse1_GFP_Dll4_014.nd2	1384.07		471.447	471.447			1878.8		-16.0067	0
190	GFP lo_mouse1_GFP_Dll4_014.nd2	1297.78		385.157	385.157			1896.15		1.34333	1.34333
191	GFP lo_mouse1_GFP_Dll4_014.nd2	1346.1		433.477	433.477			1929.57		34.7633	34.7633
192	GFP lo_mouse1_GFP_Dll4_014.nd2	1073.26		160.637	160.637			1341.79		-553.017	0
193	GFP lo_mouse1_GFP_Dll4_015.nd2	1333.53		372.297	372.297			1731.56		251.293	251.293
194	GFP lo_mouse1_GFP_Dll4_015.nd2	1281.67		320.437	320.437			1710.49		230.223	230.223
195	GFP lo_mouse1_GFP_Dll4_015.nd2	1390.13		428.897	428.897			1489.66		9.39333	9.39333
196	GFP lo_mouse1_GFP_Dll4_015.nd2	1495.25		534.017	534.017			1398.43		-81.8367	0
197	GFP lo_mouse1_GFP_Dll4_016.nd2	1390.32	946.137	444.183	444.183			2032.8	1831.44	201.363	201.363
198	GFP lo_mouse1_GFP_Dll4_016.nd2	1311.06		364.923	364.923			1956.58		125.143	125.143
199	GFP lo_mouse1_GFP_Dll4_016.nd2	1248.49		302.353	302.353			1885.9		54.4633	54.4633
200	GFP lo_mouse1_GFP_Dll4_016.nd2	1404.47		458.333	458.333			1635.83		-195.607	0
201	GFP lo_mouse1_GFP_Dll4_016.nd2	1461.04		514.903	514.903			1813.14		-18.2967	0
202	GFP lo_mouse1_GFP_Dll4_016.nd2	1640.23		694.093	694.093			2056.05		224.613	224.613
203	GFP lo_mouse1_GFP_Dll4_016.nd2	1327.15		381.013	381.013			1775.07		-56.3667	0
204	GFP lo_mouse1_GFP_Dll4_016.nd2	1264.59		318.453	318.453			2021.61		190.173	190.173
205	GFP lo_mouse1_GFP_Dll4_016.nd2	1017.85		71.7133	71.7133			1467.77		-363.667	0
206	GFP lo_mouse1_GFP_Dll4_016.nd2	1506.38		560.243	560.243			1755.46		-75.9767	0
207	GFP lo_mouse1_GFP_Dll4_016.nd2	953.97		7.83333	7.83333			1679.94		-151.497	0
208	GFP lo_mouse1_GFP_Dll4_017.nd2	1346.61	919.21	427.4	427.4			2032.53	1768.4	264.133	264.133
209	GFP lo_mouse1_GFP_Dll4_017.nd2	1172.18		252.97	252.97			1613.53		-154.867	0
210	GFP lo_mouse1_GFP_Dll4_017.nd2	1023.53		104.32	104.32			1583.19		-185.207	0
211	GFP lo_mouse1_GFP_Dll4_017.nd2	1335.41		416.2	416.2			1846.49		78.0933	78.0933
212	GFP lo_mouse1_GFP_Dll4_017.nd2	1477.51		558.3	558.3			1709.11		-59.2867	0
213	GFP lo_mouse1_GFP_Dll4_018.nd2	1454.81		535.143	535.143			1659.69		59.91	59.91
214	GFP lo_mouse1_GFP_Dll4_019.nd2	1355.12	998.4	356.72	356.72			1661.22	1900.08	-238.863	0
215	GFP lo_mouse1_GFP_Dll4_019.nd2	1386.41		388.01	388.01			1607.81		-292.273	0
216	GFP lo_mouse1_GFP_Dll4_019.nd2	1320.21		321.81	321.81			1628.55		-271.533	0
217	GFP lo_mouse1_GFP_Dll4_019.nd2	1421.3		422.9	422.9			1605.74		-294.343	0
218	GFP lo_mouse1_GFP_Dll4_019.nd2	1177.31		178.91	178.91			1593.83		-306.253	0
219	GFP lo_mouse1_GFP_Dll4_019.nd2	1283.39		284.99	284.99			1569.31		-330.773	0
220	GFP lo_mouse1_GFP_Dll4_019.nd2	1424.33		425.93	425.93			1528.57		-371.513	0
221	GFP lo_mouse1_GFP_Dll4_019.nd2	1159.58		161.18	161.18			1541.3		-358.783	0
222	GFP lo_mouse1_GFP_Dll4_019.nd2	1183.05		184.65	184.65			1434.54		-465.543	0
223	GFP lo_mouse1_GFP_Dll4_019.nd2	1453.12		454.72	454.72			1419.46		-480.623	0
224	GFP lo_mouse1_GFP_Dll4_019.nd2	1151.63		153.23	153.23			1491.2		-408.883	0
225	GFP lo_mouse1_GFP_Dll4_019.nd2	1197.62		199.22	199.22			1536.87		-363.213	0
226	GFP lo_mouse1_GFP_Dll4_019.nd2	1220.54		222.14	222.14			1542.13		-357.953	0
227	GFP lo_mouse1_GFP_Dll4_019.nd2	1285.33		286.93	286.93			1450.32		-449.763	0
228	GFP lo_mouse1_GFP_Dll4_019.nd2	1434.04		435.64	435.64			1414.32		-485.763	0
229	GFP lo_mouse1_GFP_Dll4_019.nd2	1219.07		220.67	220.67			1424.29		-475.793	0
230	GFP lo_mouse1_GFP_Dll4_019.nd2	1306		307.6	307.6			1473.75		-426.333	0
231	GFP lo_mouse1_GFP_Dll4_020.nd2	1656.25	995.31	660.94	660.94			1692.89	1918.9	-226.013	0
232	GFP lo_mouse1_GFP_Dll4_020.nd2	1485.27		489.96	489.96			1704.05		-214.853	0
233	GFP lo_mouse1_GFP_Dll4_020.nd2	1518.24		522.93	522.93			1663.84		-255.063	0
234	GFP lo_mouse1_GFP_Dll4_020.nd2	1447.44		452.13	452.13			1569.37		-349.533	0
235	GFP lo_mouse1_GFP_Dll4_020.nd2	1251.3		255.99	255.99			1691.9		-227.003	0
236	GFP lo_mouse1_GFP_Dll4_020.nd2	1659.17		663.86	663.86			1691.51		-227.393	0
237	GFP lo_mouse1_GFP_Dll4_020.nd2	1599.67		604.36	604.36			1694.77		-224.133	0
238	GFP lo_mouse1_GFP_Dll4_020.nd2	1639.21		643.9	643.9			1419.57		-499.333	0
239	GFP lo_mouse1_GFP_Dll4_020.nd2	1363.11		367.8	367.8			1476.95		-441.953	0
240	GFP lo_mouse1_GFP_Dll4_020.nd2	1249.01		253.7	253.7			1571.11		-347.793	0
241	GFP lo_mouse1_GFP_Dll4_020.nd2	974.46		-20.85	0			1423.15		-495.753	0
242	GFP lo_mouse1_GFP_Dll4_020.nd2	1144.07		148.76	148.76			1411.32		-507.583	0
243	GFP lo_mouse1_GFP_Dll4_020.nd2	1135.27		139.96	139.96			1133.77		-785.133	0
244	GFP lo_mouse1_GFP_Dll4_020.nd2	1465.17		469.86	469.86			1519.26		-399.643	0
245	GFP lo_mouse1_GFP_Dll4_020.nd2	1369.42		374.11	374.11			1595.29		-323.613	0
246	GFP lo_mouse1_GFP_Dll4_020.nd2	1337.41		342.1	342.1			1250.01		-668.893	0
247	GFP lo_mouse1_GFP_Dll4_020.nd2	1434.68		439.37	439.37			1509.04		-409.863	0
248	GFP lo_mouse1_GFP_Dll4_021.nd2	1527.78	969.817	557.963	557.963			2016.16	1920.84	95.3167	95.3167
249	GFP lo_mouse1_GFP_Dll4_021.nd2	1473.87		504.053	504.053			1946.07		25.2267	25.2267
250	GFP lo_mouse1_GFP_Dll4_021.nd2	1437.54		467.723	467.723			1947.04		26.1967	26.1967
251	GFP lo_mouse1_GFP_Dll4_021.nd2	1358.43		388.613	388.613			1896.33		-24.5133	0
252	GFP lo_mouse1_GFP_Dll4_021.nd2	1398.27		428.453	428.453			1818.14		-102.703	0
253	GFP lo_mouse1_GFP_Dll4_021.nd2	1236.21		266.393	266.393			1628.39		-292.453	0
254	GFP lo_mouse1_GFP_Dll4_021.nd2	1385.47		415.653	415.653			1849.72		-71.1233	0
255	GFP lo_mouse1_GFP_Dll4_021.nd2	1629.19		659.373	659.373			1870.29		-50.5533	0
256	GFP lo_mouse1_GFP_Dll4_021.nd2	1637.42		667.603	667.603			1613.75		-307.093	0
257	GFP lo_mouse1_GFP_Dll4_022.nd2	1184.61	894.04	290.57	290.57			2126.8	1882.13	244.673	244.673
258	GFP lo_mouse1_GFP_Dll4_022.nd2	1516.1		622.06	622.06			2056.55		174.423	174.423
259	GFP lo_mouse1_GFP_Dll4_022.nd2	1392.23		498.19	498.19			1939.86		57.7333	57.7333
260	GFP lo_mouse1_GFP_Dll4_022.nd2	1317.78		423.74	423.74			1917.93		35.8033	35.8033
261	GFP lo_mouse1_GFP_Dll4_022.nd2	1447.62		553.58	553.58			1812.74		-69.3867	0
262	GFP lo_mouse1_GFP_Dll4_022.nd2	1365.84		471.8	471.8			1798.58		-83.5467	0
263	GFP lo_mouse1_GFP_Dll4_022.nd2	1381.95		487.91	487.91			1856.67		-25.4567	0
264	GFP lo_mouse1_GFP_Dll4_022.nd2	1480.26		586.22	586.22			1867.02		-15.1067	0
265	GFP lo_mouse1_GFP_Dll4_022.nd2	1479.61		585.57	585.57			1875.32		-6.80667	0
266	GFP lo_mouse1_GFP_Dll4_022.nd2	1488.29		594.25	594.25			1841.93		-40.1967	0
267	GFP lo_mouse1_GFP_Dll4_022.nd2	1358.25		464.21	464.21			1748.91		-133.217	0
268	GFP lo_mouse1_GFP_Dll4_022.nd2	1007.93		113.89	113.89			1494.87		-387.257	0
269	GFP lo_mouse1_GFP_Dll4_022.nd2	1442.89		548.85	548.85			1929.09		46.9633	46.9633
270	GFP lo_mouse1_GFP_Dll4_022.nd2	1574.7		680.66	680.66			1761.85		-120.277	0
271	GFP lo_mouse1_GFP_Dll4_022.nd2	1518.38		624.34	624.34			1663.19		-218.937	0
272	GFP lo_mouse1_GFP_Dll4_022.nd2	1502.04		608	608			1873.01		-9.11667	0
273	GFP lo_mouse1_GFP_Dll4_022.nd2	1266.65		372.61	372.61			1685.47		-196.657	0

## Sheet: GFP hi_mouse2
					Dll4 mean intensity						Pax7nGFP mean intensity
Item	Source	Dll4 (TxRed) mean intensity	TxRed background	Dll4 mean intensity	Corrected minus to zeros			Pax7nGFP (GFP) mean intensity	GFP background	Pax7nGFP mean intensity	Corrected minus to zeros
1	GFP hi_mouse2_GFP_Dll4_026.nd2	1931.44	1139.36	792.077	792.077			1958.13	1687.72	270.413	270.413
2	GFP hi_mouse2_GFP_Dll4_026.nd2	1608.72		469.357	469.357			1992		304.283	304.283
3	GFP hi_mouse2_GFP_Dll4_026.nd2	2286.37		1147.01	1147.01			1914		226.283	226.283
4	GFP hi_mouse2_GFP_Dll4_026.nd2	1612.4		473.037	473.037			1908.47		220.753	220.753
5	GFP hi_mouse2_GFP_Dll4_027.nd2	2259.11		1067.66	1067.66			2027.97		220.94	220.94
6	GFP hi_mouse2_GFP_Dll4_027.nd2	1829.99		638.543	638.543			2054.66		247.63	247.63
7	GFP hi_mouse2_GFP_Dll4_028.nd2	2083.26	1192.17	891.093	891.093			2077.52	1803.31	274.213	274.213
8	GFP hi_mouse2_GFP_Dll4_028.nd2	1924.8		732.633	732.633			2089.18		285.873	285.873
9	GFP hi_mouse2_GFP_Dll4_028.nd2	1903.66		711.493	711.493			2031.14		227.833	227.833
10	GFP hi_mouse2_GFP_Dll4_029.nd2	1655.65	1158.3	497.35	497.35			1968.7	1755.23	213.473	213.473
11	GFP hi_mouse2_GFP_Dll4_029.nd2	2270.85		1112.55	1112.55			2118.27		363.043	363.043
12	GFP hi_mouse2_GFP_Dll4_029.nd2	1845.99		687.69	687.69			2128.28		373.053	373.053
13	GFP hi_mouse2_GFP_Dll4_029.nd2	1721.99		563.69	563.69			2081.79		326.563	326.563
14	GFP hi_mouse2_GFP_Dll4_029.nd2	2044.29		885.99	885.99			2332.59		577.363	577.363
15	GFP hi_mouse2_GFP_Dll4_029.nd2	2058.93		900.63	900.63			1970.27		215.043	215.043
16	GFP hi_mouse2_GFP_Dll4_029.nd2	1516.98		358.68	358.68			2080.92		325.693	325.693
17	GFP hi_mouse2_GFP_Dll4_030.nd2	1802.09	1080.39	721.697	721.697			1661.57	1363.47	298.103	298.103
18	GFP hi_mouse2_GFP_Dll4_030.nd2	1899.73		819.337	819.337			1680.81		317.343	317.343
19	GFP hi_mouse2_GFP_Dll4_030.nd2	1967.11		886.717	886.717			1592.83		229.363	229.363
20	GFP hi_mouse2_GFP_Dll4_030.nd2	1355.42		275.027	275.027			1567.8		204.333	204.333
21	GFP hi_mouse2_GFP_Dll4_030.nd2	1866.24		785.847	785.847			1618.18		254.713	254.713
22	GFP hi_mouse2_GFP_Dll4_030.nd2	1962.37		881.977	881.977			1644.48		281.013	281.013
23	GFP hi_mouse2_GFP_Dll4_031.nd2	1816.84	1113.38	703.463	703.463			1940.44	1551.92	388.523	388.523
24	GFP hi_mouse2_GFP_Dll4_031.nd2	2025.61		912.233	912.233			1987.61		435.693	435.693
25	GFP hi_mouse2_GFP_Dll4_031.nd2	1678.48		565.103	565.103			1796.96		245.043	245.043
26	GFP hi_mouse2_GFP_Dll4_031.nd2	2004.56		891.183	891.183			2050.28		498.363	498.363
27	GFP hi_mouse2_GFP_Dll4_031.nd2	1951.59		838.213	838.213			1938.78		386.863	386.863
28	GFP hi_mouse2_GFP_Dll4_031.nd2	2084.32		970.943	970.943			1943.5		391.583	391.583
29	GFP hi_mouse2_GFP_Dll4_031.nd2	2135.65		1022.27	1022.27			1875.09		323.173	323.173
30	GFP hi_mouse2_GFP_Dll4_031.nd2	1864.25		750.873	750.873			1940.11		388.193	388.193
31	GFP hi_mouse2_GFP_Dll4_031.nd2	1616.02		502.643	502.643			1826.34		274.423	274.423
32	GFP hi_mouse2_GFP_Dll4_031.nd2	1865.24		751.863	751.863			1879.04		327.123	327.123
33	GFP hi_mouse2_GFP_Dll4_031.nd2	1773.53		660.153	660.153			1878.19		326.273	326.273
34	GFP hi_mouse2_GFP_Dll4_031.nd2	1700.29		586.913	586.913			1845.58		293.663	293.663
35	GFP hi_mouse2_GFP_Dll4_031.nd2	1876.17		762.793	762.793			1757.33		205.413	205.413
36	GFP hi_mouse2_GFP_Dll4_031.nd2	1497.08		383.703	383.703			1903.6		351.683	351.683
37	GFP hi_mouse2_GFP_Dll4_032.nd2	1954.47		810.017	810.017			1834.26		240.533	240.533
38	GFP hi_mouse2_GFP_Dll4_032.nd2	2075.52		931.067	931.067			1817.67		223.943	223.943
39	GFP hi_mouse2_GFP_Dll4_032.nd2	1569.36		424.907	424.907			1801.98		208.253	208.253
40	GFP hi_mouse2_GFP_Dll4_033.nd2	1621.87		481.517	481.517			1735.51		245.493	245.493
41	GFP hi_mouse2_GFP_Dll4_033.nd2	1856.05		715.697	715.697			1848.77		358.753	358.753
42	GFP hi_mouse2_GFP_Dll4_033.nd2	1695.44		555.087	555.087			1797.65		307.633	307.633
43	GFP hi_mouse2_GFP_Dll4_033.nd2	1784.26		643.907	643.907			1726.4		236.383	236.383
44	GFP hi_mouse2_GFP_Dll4_033.nd2	1785.41		645.057	645.057			1779.88		289.863	289.863
45	GFP hi_mouse2_GFP_Dll4_034.nd2	1933.36	1149.96	783.4	783.4			1764.79	1509.83	254.957	254.957
46	GFP hi_mouse2_GFP_Dll4_034.nd2	1861.85		711.89	711.89			1778.87		269.037	269.037
47	GFP hi_mouse2_GFP_Dll4_034.nd2	1917.54		767.58	767.58			1830.37		320.537	320.537
48	GFP hi_mouse2_GFP_Dll4_034.nd2	1783.06		633.1	633.1			1738.41		228.577	228.577
49	GFP hi_mouse2_GFP_Dll4_034.nd2	1924.27		774.31	774.31			1911.45		401.617	401.617
50	GFP hi_mouse2_GFP_Dll4_034.nd2	1838.77		688.81	688.81			1817.12		307.287	307.287
51	GFP hi_mouse2_GFP_Dll4_034.nd2	1748.54		598.58	598.58			1853.4		343.567	343.567
52	GFP hi_mouse2_GFP_Dll4_035.nd2	2219.05		1047.72	1047.72			1982.7		357.603	357.603
53	GFP hi_mouse2_GFP_Dll4_035.nd2	1860.72		689.39	689.39			1838.2		213.103	213.103
54	GFP hi_mouse2_GFP_Dll4_035.nd2	1774.42		603.09	603.09			1924.31		299.213	299.213
55	GFP hi_mouse2_GFP_Dll4_035.nd2	1843.74		672.41	672.41			1908.1		283.003	283.003
56	GFP hi_mouse2_GFP_Dll4_035.nd2	1761.39		590.06	590.06			1889.74		264.643	264.643
57	GFP hi_mouse2_GFP_Dll4_035.nd2	1709.49		538.16	538.16			1873.75		248.653	248.653
58	GFP hi_mouse2_GFP_Dll4_035.nd2	1784.05		612.72	612.72			1929.08		303.983	303.983
59	GFP hi_mouse2_GFP_Dll4_035.nd2	1523.51		352.18	352.18			1876.79		251.693	251.693
60	GFP hi_mouse2_GFP_Dll4_035.nd2	1769.83		598.5	598.5			1868.89		243.793	243.793
61	GFP hi_mouse2_GFP_Dll4_035.nd2	1892.8		721.47	721.47			1868.53		243.433	243.433
62	GFP hi_mouse2_GFP_Dll4_035.nd2	1531.7		360.37	360.37			1852.4		227.303	227.303
63	GFP hi_mouse2_GFP_Dll4_036.nd2	1454.5	1150.42	304.083	304.083			1684.75	1406.89	277.86	277.86
64	GFP hi_mouse2_GFP_Dll4_036.nd2	1882.07		731.653	731.653			1634.75		227.86	227.86
65	GFP hi_mouse2_GFP_Dll4_036.nd2	1680.27		529.853	529.853			1612.97		206.08	206.08
66	GFP hi_mouse2_GFP_Dll4_037.nd2	1714.09	1182.91	531.177	531.177			2026.72	1723.15	303.57	303.57
67	GFP hi_mouse2_GFP_Dll4_037.nd2	1813.84		630.927	630.927			1953.99		230.84	230.84
68	GFP hi_mouse2_GFP_Dll4_037.nd2	2334.72		1151.81	1151.81			2043.61		320.46	320.46
69	GFP hi_mouse2_GFP_Dll4_037.nd2	2098.08		915.167	915.167			1935.38		212.23	212.23
70	GFP hi_mouse2_GFP_Dll4_037.nd2	1861.53		678.617	678.617			1941.67		218.52	218.52
71	GFP hi_mouse2_GFP_Dll4_038.nd2	2017.25	1189.16	828.093	828.093			1960.2	1747.03	213.167	213.167
72	GFP hi_mouse2_GFP_Dll4_038.nd2	2184.78		995.623	995.623			2143.23		396.197	396.197
73	GFP hi_mouse2_GFP_Dll4_038.nd2	1856.85		667.693	667.693			2169.4		422.367	422.367
74	GFP hi_mouse2_GFP_Dll4_038.nd2	2111.48		922.323	922.323			2166.09		419.057	419.057
75	GFP hi_mouse2_GFP_Dll4_038.nd2	2624.3		1435.14	1435.14			2111.45		364.417	364.417
76	GFP hi_mouse2_GFP_Dll4_038.nd2	1934.62		745.463	745.463			2035.33		288.297	288.297
77	GFP hi_mouse2_GFP_Dll4_038.nd2	1643.18		454.023	454.023			1968.87		221.837	221.837
78	GFP hi_mouse2_GFP_Dll4_039.nd2	1777.22	1171.82	605.4	605.4			2120.53	1764.34	356.187	356.187
79	GFP hi_mouse2_GFP_Dll4_039.nd2	1957.67		785.85	785.85			2175.46		411.117	411.117
80	GFP hi_mouse2_GFP_Dll4_039.nd2	2133.74		961.92	961.92			2121.24		356.897	356.897
81	GFP hi_mouse2_GFP_Dll4_039.nd2	1819.6		647.78	647.78			1998.17		233.827	233.827
82	GFP hi_mouse2_GFP_Dll4_039.nd2	1454.91		283.09	283.09			1987.14		222.797	222.797
83	GFP hi_mouse2_GFP_Dll4_039.nd2	2067.18		895.36	895.36			1987.5		223.157	223.157
84	GFP hi_mouse2_GFP_Dll4_040.nd2	1780.33		611.507	611.507			1971.59		208.383	208.383
85	GFP hi_mouse2_GFP_Dll4_040.nd2	1940.75		771.927	771.927			2157.27		394.063	394.063
86	GFP hi_mouse2_GFP_Dll4_040.nd2	2041.09		872.267	872.267			2025.06		261.853	261.853
87	GFP hi_mouse2_GFP_Dll4_040.nd2	1638.27		469.447	469.447			2105.69		342.483	342.483
88	GFP hi_mouse2_GFP_Dll4_040.nd2	2055.69		886.867	886.867			1992.15		228.943	228.943
89	GFP hi_mouse2_GFP_Dll4_041.nd2	1785.28		605.137	605.137			1980		248.4	248.4
90	GFP hi_mouse2_GFP_Dll4_041.nd2	2353.89		1173.75	1173.75			2011.97		280.37	280.37
91	GFP hi_mouse2_GFP_Dll4_041.nd2	2022.97		842.827	842.827			1954		222.4	222.4
92	GFP hi_mouse2_GFP_Dll4_041.nd2	1745.02		564.877	564.877			1951.89		220.29	220.29
93	GFP hi_mouse2_GFP_Dll4_041.nd2	1682.79		502.647	502.647			1943.7		212.1	212.1
94	GFP hi_mouse2_GFP_Dll4_041.nd2	1856.06		675.917	675.917			2055.6		324	324
95	GFP hi_mouse2_GFP_Dll4_041.nd2	1921.12		740.977	740.977			1986.14		254.54	254.54
96	GFP hi_mouse2_GFP_Dll4_042.nd2	1642.82		462.327	462.327			2086.99		314.273	314.273
97	GFP hi_mouse2_GFP_Dll4_042.nd2	1527.97		347.477	347.477			2102.78		330.063	330.063
98	GFP hi_mouse2_GFP_Dll4_042.nd2	2243.56		1063.07	1063.07			2067.53		294.813	294.813
99	GFP hi_mouse2_GFP_Dll4_042.nd2	2205.49		1025	1025			2113.84		341.123	341.123
100	GFP hi_mouse2_GFP_Dll4_042.nd2	2514.49		1334	1334			2095.33		322.613	322.613
101	GFP hi_mouse2_GFP_Dll4_042.nd2	2394.1		1213.61	1213.61			2036.4		263.683	263.683
102	GFP hi_mouse2_GFP_Dll4_042.nd2	2050.76		870.267	870.267			2079.32		306.603	306.603
103	GFP hi_mouse2_GFP_Dll4_042.nd2	2469.1		1288.61	1288.61			2012.73		240.013	240.013

## Sheet: GFP med_mouse2
					Dll4 mean intensity						Pax7nGFP mean intensity
Item	Source	Dll4 (TxRed) mean intensity	TxRed background	Dll4 mean intensity	Corrected minus to zeros			Pax7nGFP (GFP) mean intensity	GFP background	Pax7nGFP mean intensity	Corrected minus to zeros
1	GFP med_mouse2_GFP_Dll4_026.nd2	1528.58	989.227	539.353	539.353			2028.9	1773.87	255.033	255.033
2	GFP med_mouse2_GFP_Dll4_026.nd2	1546.74		557.513	557.513			1989.08		215.213	215.213
3	GFP med_mouse2_GFP_Dll4_026.nd2	1684.1		694.873	694.873			2023.42		249.553	249.553
4	GFP med_mouse2_GFP_Dll4_026.nd2	1275.12		285.893	285.893			1943.94		170.073	170.073
5	GFP med_mouse2_GFP_Dll4_026.nd2	1374.57		385.343	385.343			1884		110.133	110.133
6	GFP med_mouse2_GFP_Dll4_027.nd2	1624.37	1071.96	552.41	552.41			2004.69	1849.98	154.707	154.707
7	GFP med_mouse2_GFP_Dll4_027.nd2	1825.61		753.65	753.65			2086.51		236.527	236.527
8	GFP med_mouse2_GFP_Dll4_028.nd2	1920.58	994.9	925.68	925.68			2095.74	1785.57	310.173	310.173
9	GFP med_mouse2_GFP_Dll4_028.nd2	1416.47		421.57	421.57			1895.06		109.493	109.493
10	GFP med_mouse2_GFP_Dll4_028.nd2	1654.47		659.57	659.57			1957.83		172.263	172.263
11	GFP med_mouse2_GFP_Dll4_028.nd2	1533.68		538.78	538.78			1915.73		130.163	130.163
12	GFP med_mouse2_GFP_Dll4_028.nd2	1735.91		741.01	741.01			1948.88		163.313	163.313
13	GFP med_mouse2_GFP_Dll4_028.nd2	1432.86		437.96	437.96			2057.24		271.673	271.673
14	GFP med_mouse2_GFP_Dll4_029.nd2	1454.16	927.497	526.663	526.663			1580.56	1387.4	193.16	193.16
15	GFP med_mouse2_GFP_Dll4_029.nd2	1614.89		687.393	687.393			1563.13		175.73	175.73
16	GFP med_mouse2_GFP_Dll4_029.nd2	1501.99		574.493	574.493			1691.12		303.72	303.72
17	GFP med_mouse2_GFP_Dll4_029.nd2	1661.16		733.663	733.663			1653.63		266.23	266.23
18	GFP med_mouse2_GFP_Dll4_029.nd2	1779.72		852.223	852.223			1511.75		124.35	124.35
19	GFP med_mouse2_GFP_Dll4_029.nd2	1641.2		713.703	713.703			1692.91		305.51	305.51
20	GFP med_mouse2_GFP_Dll4_029.nd2	1324.74		397.243	397.243			1592.54		205.14	205.14
21	GFP med_mouse2_GFP_Dll4_029.nd2	1465.13		537.633	537.633			1543.74		156.34	156.34
22	GFP med_mouse2_GFP_Dll4_030.nd2	1680.35	943.293	737.057	737.057			1597.93	1358.88	239.053	239.053
23	GFP med_mouse2_GFP_Dll4_030.nd2	1576.91		633.617	633.617			1583.06		224.183	224.183
24	GFP med_mouse2_GFP_Dll4_030.nd2	1282.18		338.887	338.887			1525.34		166.463	166.463
25	GFP med_mouse2_GFP_Dll4_030.nd2	1579.39		636.097	636.097			1493.36		134.483	134.483
26	GFP med_mouse2_GFP_Dll4_030.nd2	1279.44		336.147	336.147			1586.67		227.793	227.793
27	GFP med_mouse2_GFP_Dll4_030.nd2	1435.21		491.917	491.917			1476.29		117.413	117.413
28	GFP med_mouse2_GFP_Dll4_030.nd2	1415.14		471.847	471.847			1497.44		138.563	138.563
29	GFP med_mouse2_GFP_Dll4_030.nd2	1461.24		517.947	517.947			1462.59		103.713	103.713
30	GFP med_mouse2_GFP_Dll4_031.nd2	1688.3	954.537	733.763	733.763			1898.45	1536.04	362.407	362.407
31	GFP med_mouse2_GFP_Dll4_031.nd2	1390.61		436.073	436.073			1805.41		269.367	269.367
32	GFP med_mouse2_GFP_Dll4_031.nd2	1818.05		863.513	863.513			1659.43		123.387	123.387
33	GFP med_mouse2_GFP_Dll4_031.nd2	1486.68		532.143	532.143			1860.53		324.487	324.487
34	GFP med_mouse2_GFP_Dll4_031.nd2	1459.27		504.733	504.733			1733.9		197.857	197.857
35	GFP med_mouse2_GFP_Dll4_031.nd2	1453.64		499.103	499.103			1855.89		319.847	319.847
36	GFP med_mouse2_GFP_Dll4_031.nd2	1452.55		498.013	498.013			1774.68		238.637	238.637
37	GFP med_mouse2_GFP_Dll4_031.nd2	1429.65		475.113	475.113			1763.69		227.647	227.647
38	GFP med_mouse2_GFP_Dll4_032.nd2	1846.72	1037.48	809.237	809.237			2126.32	1850.69	275.633	275.633
39	GFP med_mouse2_GFP_Dll4_032.nd2	1684.8		647.317	647.317			1981.1		130.413	130.413
40	GFP med_mouse2_GFP_Dll4_032.nd2	1207.27		169.787	169.787			2003.52		152.833	152.833
41	GFP med_mouse2_GFP_Dll4_032.nd2	1557.24		519.757	519.757			2007.69		157.003	157.003
42	GFP med_mouse2_GFP_Dll4_032.nd2	1597.19		559.707	559.707			1951.02		100.333	100.333
43	GFP med_mouse2_GFP_Dll4_033.nd2	1714.62	1095.1	619.517	619.517			2081.9	1886.79	195.113	195.113
44	GFP med_mouse2_GFP_Dll4_033.nd2	1243.62		148.517	148.517			2043.82		157.033	157.033
45	GFP med_mouse2_GFP_Dll4_034.nd2	1606.07	1090.91	515.16	515.16			2120.94	1921.79	199.153	199.153
46	GFP med_mouse2_GFP_Dll4_034.nd2	1642.14		551.23	551.23			2215.29		293.503	293.503
47	GFP med_mouse2_GFP_Dll4_034.nd2	2012.06		921.15	921.15			2237.07		315.283	315.283
48	GFP med_mouse2_GFP_Dll4_034.nd2	1651.07		560.16	560.16			2297.2		375.413	375.413
49	GFP med_mouse2_GFP_Dll4_034.nd2	1466.97		376.06	376.06			2299.46		377.673	377.673
50	GFP med_mouse2_GFP_Dll4_034.nd2	1565.19		474.28	474.28			2249.97		328.183	328.183
51	GFP med_mouse2_GFP_Dll4_034.nd2	1446.02		355.11	355.11			2204.41		282.623	282.623
52	GFP med_mouse2_GFP_Dll4_034.nd2	1843.38		752.47	752.47			2102.66		180.873	180.873
53	GFP med_mouse2_GFP_Dll4_034.nd2	1369.62		278.71	278.71			2140.21		218.423	218.423
54	GFP med_mouse2_GFP_Dll4_035.nd2	1216.09	1055.91	160.18	160.18			2220.42	1896.88	323.537	323.537
55	GFP med_mouse2_GFP_Dll4_035.nd2	1343.57		287.66	287.66			2192.11		295.227	295.227
56	GFP med_mouse2_GFP_Dll4_035.nd2	1374.26		318.35	318.35			2059.3		162.417	162.417
57	GFP med_mouse2_GFP_Dll4_035.nd2	1686.06		630.15	630.15			2115.46		218.577	218.577
58	GFP med_mouse2_GFP_Dll4_035.nd2	1794.59		738.68	738.68			2142.86		245.977	245.977
59	GFP med_mouse2_GFP_Dll4_035.nd2	1510.53		454.62	454.62			2117.62		220.737	220.737
60	GFP med_mouse2_GFP_Dll4_035.nd2	1280.6		224.69	224.69			2093.28		196.397	196.397
61	GFP med_mouse2_GFP_Dll4_035.nd2	1147.49		91.58	91.58			2128.03		231.147	231.147
62	GFP med_mouse2_GFP_Dll4_035.nd2	1271.08		215.17	215.17			2007.05		110.167	110.167
63	GFP med_mouse2_GFP_Dll4_036.nd2	1513.54	986.507	527.033	527.033			2136.2	1843.34	292.863	292.863
64	GFP med_mouse2_GFP_Dll4_036.nd2	1610.11		623.603	623.603			2084.82		241.483	241.483
65	GFP med_mouse2_GFP_Dll4_036.nd2	1354.46		367.953	367.953			2016.66		173.323	173.323
66	GFP med_mouse2_GFP_Dll4_036.nd2	1659.9		673.393	673.393			2030.96		187.623	187.623
67	GFP med_mouse2_GFP_Dll4_037.nd2	1562.88		552.303	552.303			1929.19		106.98	106.98
68	GFP med_mouse2_GFP_Dll4_037.nd2	1725.28		714.703	714.703			2054.82		232.61	232.61
69	GFP med_mouse2_GFP_Dll4_037.nd2	1752.88		742.303	742.303			1934.02		111.81	111.81
70	GFP med_mouse2_GFP_Dll4_037.nd2	1178.5		167.923	167.923			1926.09		103.88	103.88
71	GFP med_mouse2_GFP_Dll4_038.nd2	1465.63	1005.92	459.71	459.71			1986.73	1736.15	250.577	250.577
72	GFP med_mouse2_GFP_Dll4_038.nd2	1730.08		724.16	724.16			1994.31		258.157	258.157
73	GFP med_mouse2_GFP_Dll4_038.nd2	1780.62		774.7	774.7			1947.6		211.447	211.447
74	GFP med_mouse2_GFP_Dll4_038.nd2	1774.77		768.85	768.85			1924.25		188.097	188.097
75	GFP med_mouse2_GFP_Dll4_038.nd2	1547.89		541.97	541.97			1916.5		180.347	180.347
76	GFP med_mouse2_GFP_Dll4_038.nd2	1393.25		387.33	387.33			1849.9		113.747	113.747
77	GFP med_mouse2_GFP_Dll4_038.nd2	1490.69		484.77	484.77			1910.05		173.897	173.897
78	GFP med_mouse2_GFP_Dll4_038.nd2	1593.66		587.74	587.74			1893.74		157.587	157.587
79	GFP med_mouse2_GFP_Dll4_039.nd2	1472.95	896.14	576.81	576.81			1701.78	1440.67	261.107	261.107
80	GFP med_mouse2_GFP_Dll4_039.nd2	1451.72		555.58	555.58			1665		224.327	224.327
81	GFP med_mouse2_GFP_Dll4_039.nd2	1518.5		622.36	622.36			1660.1		219.427	219.427
82	GFP med_mouse2_GFP_Dll4_039.nd2	1317.34		421.2	421.2			1709.91		269.237	269.237
83	GFP med_mouse2_GFP_Dll4_039.nd2	1489.53		593.39	593.39			1696.41		255.737	255.737
84	GFP med_mouse2_GFP_Dll4_039.nd2	1232.08		335.94	335.94			1699.34		258.667	258.667
85	GFP med_mouse2_GFP_Dll4_039.nd2	1431.74		535.6	535.6			1604.78		164.107	164.107
86	GFP med_mouse2_GFP_Dll4_039.nd2	1407.95		511.81	511.81			1601.87		161.197	161.197
87	GFP med_mouse2_GFP_Dll4_039.nd2	1356.94		460.8	460.8			1583.3		142.627	142.627
88	GFP med_mouse2_GFP_Dll4_039.nd2	1230.95		334.81	334.81			1614.65		173.977	173.977
89	GFP med_mouse2_GFP_Dll4_039.nd2	1321.71		425.57	425.57			1621.97		181.297	181.297
90	GFP med_mouse2_GFP_Dll4_039.nd2	1375.58		479.44	479.44			1576.74		136.067	136.067
91	GFP med_mouse2_GFP_Dll4_039.nd2	1456.43		560.29	560.29			1552.74		112.067	112.067
92	GFP med_mouse2_GFP_Dll4_039.nd2	1214.21		318.07	318.07			1594.5		153.827	153.827
93	GFP med_mouse2_GFP_Dll4_039.nd2	1136.81		240.67	240.67			1622.52		181.847	181.847
94	GFP med_mouse2_GFP_Dll4_040.nd2	1242.16		284.473	284.473			1993.97		375.137	375.137
95	GFP med_mouse2_GFP_Dll4_040.nd2	1420.7		463.013	463.013			1992.95		374.117	374.117
96	GFP med_mouse2_GFP_Dll4_040.nd2	1689.84		732.153	732.153			1877.18		258.347	258.347
97	GFP med_mouse2_GFP_Dll4_040.nd2	1579.34		621.653	621.653			1746.45		127.617	127.617
98	GFP med_mouse2_GFP_Dll4_041.nd2	1801.4	978.367	823.033	823.033			2100.16	1836.58	263.58	263.58
99	GFP med_mouse2_GFP_Dll4_041.nd2	1835.12		856.753	856.753			1956.32		119.74	119.74
100	GFP med_mouse2_GFP_Dll4_042.nd2	1700.69	992.297	708.393	708.393			1867.98	1581.07	286.907	286.907
101	GFP med_mouse2_GFP_Dll4_042.nd2	1763.89		771.593	771.593			1846.23		265.157	265.157
102	GFP med_mouse2_GFP_Dll4_042.nd2	1633.89		641.593	641.593			1806.47		225.397	225.397
103	GFP med_mouse2_GFP_Dll4_042.nd2	1760.37		768.073	768.073			1762.16		181.087	181.087
104	GFP med_mouse2_GFP_Dll4_042.nd2	1260.83		268.533	268.533			1750.81		169.737	169.737
105	GFP med_mouse2_GFP_Dll4_042.nd2	1338.66		346.363	346.363			1710.53		129.457	129.457
106	GFP med_mouse2_GFP_Dll4_042.nd2	1314.76		322.463	322.463			1705.92		124.847	124.847
107	GFP med_mouse2_GFP_Dll4_042.nd2	1408.51		416.213	416.213			1759.5		178.427	178.427
108	GFP med_mouse2_GFP_Dll4_043.nd2	1752.75	997.77	754.98	754.98			2004.74	1776.77	227.973	227.973
109	GFP med_mouse2_GFP_Dll4_043.nd2	1679.54		681.77	681.77			2023.97		247.203	247.203
110	GFP med_mouse2_GFP_Dll4_043.nd2	1631.86		634.09	634.09			2033.78		257.013	257.013
111	GFP med_mouse2_GFP_Dll4_043.nd2	1436.24		438.47	438.47			1885.77		109.003	109.003
112	GFP med_mouse2_GFP_Dll4_043.nd2	1499.79		502.02	502.02			1899.78		123.013	123.013
113	GFP med_mouse2_GFP_Dll4_043.nd2	1509.98		512.21	512.21			1886.07		109.303	109.303
114	GFP med_mouse2_GFP_Dll4_043.nd2	1567.89		570.12	570.12			1943.56		166.793	166.793
115	GFP med_mouse2_GFP_Dll4_044.nd2	1481.46	909.097	572.363	572.363			1922.04	1636.71	285.33	285.33
116	GFP med_mouse2_GFP_Dll4_044.nd2	1416.59		507.493	507.493			1978.05		341.34	341.34
117	GFP med_mouse2_GFP_Dll4_044.nd2	1515.7		606.603	606.603			1967.67		330.96	330.96
118	GFP med_mouse2_GFP_Dll4_044.nd2	1479.29		570.193	570.193			1963.31		326.6	326.6
119	GFP med_mouse2_GFP_Dll4_044.nd2	1575.22		666.123	666.123			1843.36		206.65	206.65
120	GFP med_mouse2_GFP_Dll4_044.nd2	1138.26		229.163	229.163			1759.24		122.53	122.53
121	GFP med_mouse2_GFP_Dll4_044.nd2	1230.99		321.893	321.893			1978.87		342.16	342.16
122	GFP med_mouse2_GFP_Dll4_044.nd2	1447.12		538.023	538.023			1867.58		230.87	230.87
123	GFP med_mouse2_GFP_Dll4_044.nd2	1333.63		424.533	424.533			1862.1		225.39	225.39
124	GFP med_mouse2_GFP_Dll4_044.nd2	1216.2		307.103	307.103			1856.08		219.37	219.37
125	GFP med_mouse2_GFP_Dll4_044.nd2	1174.36		265.263	265.263			1994.95		358.24	358.24
126	GFP med_mouse2_GFP_Dll4_044.nd2	1606.03		696.933	696.933			1835.59		198.88	198.88
127	GFP med_mouse2_GFP_Dll4_044.nd2	1333.1		424.003	424.003			1789.61		152.9	152.9
128	GFP med_mouse2_GFP_Dll4_045.nd2	1529.5	915.227	614.273	614.273			2051.29	1835.5	215.793	215.793
129	GFP med_mouse2_GFP_Dll4_045.nd2	1426.96		511.733	511.733			2065.78		230.283	230.283
130	GFP med_mouse2_GFP_Dll4_045.nd2	1454.08		538.853	538.853			2070.02		234.523	234.523
131	GFP med_mouse2_GFP_Dll4_045.nd2	1333.59		418.363	418.363			2146.05		310.553	310.553
132	GFP med_mouse2_GFP_Dll4_045.nd2	1489.59		574.363	574.363			2115.97		280.473	280.473
133	GFP med_mouse2_GFP_Dll4_045.nd2	1542.18		626.953	626.953			2111.2		275.703	275.703
134	GFP med_mouse2_GFP_Dll4_045.nd2	1482.42		567.193	567.193			1970.19		134.693	134.693

## Sheet: GFP low_mouse2
					Dll4 mean intensity						Pax7nGFP mean intensity
Item	Source	Dll4 (TxRed) mean intensity	TxRed background	Dll4 mean intensity	Corrected minus to zeros			Pax7nGFP (GFP) mean intensity	GFP background	Pax7nGFP mean intensity	Corrected minus to zeros
1	GFP lo_mouse2_GFP_Dll4_023.nd2	1226.58	933.24	293.34	293.34			2097.27	1858.3	238.967	238.967
2	GFP lo_mouse2_GFP_Dll4_023.nd2	1315.97		382.73	382.73			1911.17		52.8667	52.8667
3	GFP lo_mouse2_GFP_Dll4_023.nd2	1588.2		654.96	654.96			1852.26		-6.04333	0
4	GFP lo_mouse2_GFP_Dll4_023.nd2	1139.01		205.77	205.77			1931.48		73.1767	73.1767
5	GFP lo_mouse2_GFP_Dll4_023.nd2	1259.84		326.6	326.6			1934.89		76.5867	76.5867
6	GFP lo_mouse2_GFP_Dll4_023.nd2	1145.9		212.66	212.66			1987.95		129.647	129.647
7	GFP lo_mouse2_GFP_Dll4_023.nd2	1390.85		457.61	457.61			1941.09		82.7867	82.7867
8	GFP lo_mouse2_GFP_Dll4_023.nd2	1582.92		649.68	649.68			1725.02		-133.283	0
9	GFP lo_mouse2_GFP_Dll4_023.nd2	1362.4		429.16	429.16			1746.2		-112.103	0
10	GFP lo_mouse2_GFP_Dll4_023.nd2	1353.18		419.94	419.94			1867.25		8.94667	8.94667
11	GFP lo_mouse2_GFP_Dll4_023.nd2	1102.14		168.9	168.9			1918.31		60.0067	60.0067
12	GFP lo_mouse2_GFP_Dll4_023.nd2	1342.81		409.57	409.57			1861.89		3.58667	3.58667
13	GFP lo_mouse2_GFP_Dll4_023.nd2	1198.6		265.36	265.36			1722.4		-135.903	0
14	GFP lo_mouse2_GFP_Dll4_023.nd2	1069.52		136.28	136.28			1828.14		-30.1633	0
15	GFP lo_mouse2_GFP_Dll4_024.nd2	1335.21	957.533	377.677	377.677			1916.24	1881.35	34.8867	34.8867
16	GFP lo_mouse2_GFP_Dll4_024.nd2	1198.16		240.627	240.627			1896.36		15.0067	15.0067
17	GFP lo_mouse2_GFP_Dll4_024.nd2	1192.61		235.077	235.077			1939.83		58.4767	58.4767
18	GFP lo_mouse2_GFP_Dll4_024.nd2	1250.87		293.337	293.337			1852.47		-28.8833	0
19	GFP lo_mouse2_GFP_Dll4_024.nd2	1111.85		154.317	154.317			1702.52		-178.833	0
20	GFP lo_mouse2_GFP_Dll4_024.nd2	1552.93		595.397	595.397			1915.52		34.1667	34.1667
21	GFP lo_mouse2_GFP_Dll4_024.nd2	1405.68		448.147	448.147			1787.2		-94.1533	0
22	GFP lo_mouse2_GFP_Dll4_024.nd2	1570.67		613.137	613.137			1683.52		-197.833	0
23	GFP lo_mouse2_GFP_Dll4_024.nd2	1602.94		645.407	645.407			1788.74		-92.6133	0
24	GFP lo_mouse2_GFP_Dll4_025.nd2	1402.61	916.74	485.87	485.87			2088.4	1860.81	227.59	227.59
25	GFP lo_mouse2_GFP_Dll4_025.nd2	1209.17		292.43	292.43			2102.08		241.27	241.27
26	GFP lo_mouse2_GFP_Dll4_025.nd2	1299.37		382.63	382.63			1884.78		23.97	23.97
27	GFP lo_mouse2_GFP_Dll4_025.nd2	1307.08		390.34	390.34			1981.72		120.91	120.91
28	GFP lo_mouse2_GFP_Dll4_025.nd2	1407.25		490.51	490.51			1881.39		20.58	20.58
29	GFP lo_mouse2_GFP_Dll4_025.nd2	1423.31		506.57	506.57			1990.68		129.87	129.87
30	GFP lo_mouse2_GFP_Dll4_025.nd2	1285.5		368.76	368.76			1746		-114.81	0
31	GFP lo_mouse2_GFP_Dll4_025.nd2	1211.1		294.36	294.36			1781.56		-79.25	0
32	GFP lo_mouse2_GFP_Dll4_025.nd2	1203.53		286.79	286.79			1456.01		-404.8	0
33	GFP lo_mouse2_GFP_Dll4_025.nd2	1237.66		320.92	320.92			1667.24		-193.57	0
34	GFP lo_mouse2_GFP_Dll4_026.nd2	1247.41	892.237	355.173	355.173			2043.52	1819.49	224.03	224.03
35	GFP lo_mouse2_GFP_Dll4_026.nd2	1425.2		532.963	532.963			2100.14		280.65	280.65
36	GFP lo_mouse2_GFP_Dll4_026.nd2	1125.99		233.753	233.753			1910.91		91.42	91.42
37	GFP lo_mouse2_GFP_Dll4_026.nd2	1210.06		317.823	317.823			1936.88		117.39	117.39
38	GFP lo_mouse2_GFP_Dll4_026.nd2	1452.27		560.033	560.033			1921.97		102.48	102.48
39	GFP lo_mouse2_GFP_Dll4_026.nd2	1551.42		659.183	659.183			2014.86		195.37	195.37
40	GFP lo_mouse2_GFP_Dll4_026.nd2	1561.98		669.743	669.743			1979.9		160.41	160.41
41	GFP lo_mouse2_GFP_Dll4_026.nd2	1218.15		325.913	325.913			1476.69		-342.8	0
42	GFP lo_mouse2_GFP_Dll4_026.nd2	1076.35		184.113	184.113			1704.03		-115.46	0
43	GFP lo_mouse2_GFP_Dll4_026.nd2	1152.02		259.783	259.783			1710.37		-109.12	0
44	GFP lo_mouse2_GFP_Dll4_026.nd2	1187.42		295.183	295.183			1724.76		-94.73	0
45	GFP lo_mouse2_GFP_Dll4_027.nd2	1327.48		440.093	440.093			1918.68		180.493	180.493
46	GFP lo_mouse2_GFP_Dll4_027.nd2	1396.78		509.393	509.393			1983		244.813	244.813
47	GFP lo_mouse2_GFP_Dll4_027.nd2	1323.67		436.283	436.283			2009.27		271.083	271.083
48	GFP lo_mouse2_GFP_Dll4_027.nd2	1524.38		636.993	636.993			1984.37		246.183	246.183
49	GFP lo_mouse2_GFP_Dll4_027.nd2	1491.04		603.653	603.653			1978.7		240.513	240.513
50	GFP lo_mouse2_GFP_Dll4_027.nd2	1282.47		395.083	395.083			1936.38		198.193	198.193
51	GFP lo_mouse2_GFP_Dll4_027.nd2	1377.7		490.313	490.313			1822.65		84.4633	84.4633
52	GFP lo_mouse2_GFP_Dll4_027.nd2	1137.23		249.843	249.843			1744.67		6.48333	6.48333
53	GFP lo_mouse2_GFP_Dll4_027.nd2	1323.67		436.283	436.283			1849.69		111.503	111.503
54	GFP lo_mouse2_GFP_Dll4_027.nd2	1389.78		502.393	502.393			1780.72		42.5333	42.5333
55	GFP lo_mouse2_GFP_Dll4_027.nd2	1449.85		562.463	562.463			1616.64		-121.547	0
56	GFP lo_mouse2_GFP_Dll4_027.nd2	1375.43		488.043	488.043			1738.37		0.183333	0.183333
57	GFP lo_mouse2_GFP_Dll4_027.nd2	1413.07		525.683	525.683			1900.4		162.213	162.213
58	GFP lo_mouse2_GFP_Dll4_028.nd2	1538.58		677.343	677.343			1763.78		-118.32	0
59	GFP lo_mouse2_GFP_Dll4_028.nd2	1269.74		408.503	408.503			1920.45		38.35	38.35
60	GFP lo_mouse2_GFP_Dll4_028.nd2	1511.64		650.403	650.403			1967.78		85.68	85.68
61	GFP lo_mouse2_GFP_Dll4_028.nd2	1246.85		385.613	385.613			1803.85		-78.25	0
62	GFP lo_mouse2_GFP_Dll4_029.nd2	1499.18	919.613	579.567	579.567			1837.78	1893.33	-55.5467	0
63	GFP lo_mouse2_GFP_Dll4_029.nd2	1487.62		568.007	568.007			1864.6		-28.7267	0
64	GFP lo_mouse2_GFP_Dll4_029.nd2	1433.53		513.917	513.917			1963.46		70.1333	70.1333
65	GFP lo_mouse2_GFP_Dll4_029.nd2	1542.46		622.847	622.847			1955.54		62.2133	62.2133
66	GFP lo_mouse2_GFP_Dll4_029.nd2	1602.17		682.557	682.557			1983.29		89.9633	89.9633
67	GFP lo_mouse2_GFP_Dll4_029.nd2	1092.06		172.447	172.447			1340.9		-552.427	0
68	GFP lo_mouse2_GFP_Dll4_029.nd2	1571		651.387	651.387			1552.41		-340.917	0
69	GFP lo_mouse2_GFP_Dll4_029.nd2	1434.87		515.257	515.257			1812.21		-81.1167	0
70	GFP lo_mouse2_GFP_Dll4_029.nd2	1361.66		442.047	442.047			1345.22		-548.107	0
71	GFP lo_mouse2_GFP_Dll4_029.nd2	1469.95		550.337	550.337			1783.74		-109.587	0
72	GFP lo_mouse2_GFP_Dll4_029.nd2	1490.36		570.747	570.747			1963.96		70.6333	70.6333
73	GFP lo_mouse2_GFP_Dll4_029.nd2	1362.64		443.027	443.027			1802.02		-91.3067	0
74	GFP lo_mouse2_GFP_Dll4_029.nd2	1328.99		409.377	409.377			1907.7		14.3733	14.3733
75	GFP lo_mouse2_GFP_Dll4_029.nd2	1140.03		220.417	220.417			1859.74		-33.5867	0
76	GFP lo_mouse2_GFP_Dll4_029.nd2	1538.18		618.567	618.567			1442.79		-450.537	0
77	GFP lo_mouse2_GFP_Dll4_029.nd2	1603.47		683.857	683.857			1582.3		-311.027	0
78	GFP lo_mouse2_GFP_Dll4_029.nd2	1301.7		382.087	382.087			1799.43		-93.8967	0
79	GFP lo_mouse2_GFP_Dll4_029.nd2	1359.93		440.317	440.317			1836.17		-57.1567	0
80	GFP lo_mouse2_GFP_Dll4_030.nd2	1423.16		490.483	490.483			1825.92		-110.79	0
81	GFP lo_mouse2_GFP_Dll4_030.nd2	1392.71		460.033	460.033			1591.55		-345.16	0
82	GFP lo_mouse2_GFP_Dll4_030.nd2	1542.88		610.203	610.203			1866.25		-70.46	0
83	GFP lo_mouse2_GFP_Dll4_030.nd2	1374.81		442.133	442.133			1895.84		-40.87	0
84	GFP lo_mouse2_GFP_Dll4_030.nd2	1445.08		512.403	512.403			1858.89		-77.82	0
85	GFP lo_mouse2_GFP_Dll4_030.nd2	1325.91		393.233	393.233			1847.06		-89.65	0
86	GFP lo_mouse2_GFP_Dll4_030.nd2	1337.95		405.273	405.273			1896.93		-39.78	0
87	GFP lo_mouse2_GFP_Dll4_030.nd2	1397.29		464.613	464.613			1896.12		-40.59	0
88	GFP lo_mouse2_GFP_Dll4_030.nd2	1275.42		342.743	342.743			1849.32		-87.39	0
89	GFP lo_mouse2_GFP_Dll4_030.nd2	1312.94		380.263	380.263			1703.54		-233.17	0
90	GFP lo_mouse2_GFP_Dll4_030.nd2	1265.85		333.173	333.173			1821.59		-115.12	0
91	GFP lo_mouse2_GFP_Dll4_030.nd2	1510.7		578.023	578.023			1858.76		-77.95	0
92	GFP lo_mouse2_GFP_Dll4_030.nd2	1479.17		546.493	546.493			1819.16		-117.55	0
93	GFP lo_mouse2_GFP_Dll4_030.nd2	1311.53		378.853	378.853			1714.82		-221.89	0
94	GFP lo_mouse2_GFP_Dll4_030.nd2	1484.95		552.273	552.273			1655.01		-281.7	0
95	GFP lo_mouse2_GFP_Dll4_030.nd2	1019.92		87.2433	87.2433			1548.17		-388.54	0
96	GFP lo_mouse2_GFP_Dll4_030.nd2	1277.22		344.543	344.543			1598.79		-337.92	0
97	GFP lo_mouse2_GFP_Dll4_030.nd2	1289.96		357.283	357.283			1610.11		-326.6	0
98	GFP lo_mouse2_GFP_Dll4_030.nd2	1437.88		505.203	505.203			1595.9		-340.81	0
99	GFP lo_mouse2_GFP_Dll4_030.nd2	1485.32		552.643	552.643			1552.06		-384.65	0
100	GFP lo_mouse2_GFP_Dll4_030.nd2	1200.46		267.783	267.783			1573.52		-363.19	0
101	GFP lo_mouse2_GFP_Dll4_031.nd2	1318.53		437.097	437.097			1572.33		-334.2	0
102	GFP lo_mouse2_GFP_Dll4_031.nd2	1324.06		442.627	442.627			1556.65		-349.88	0
103	GFP lo_mouse2_GFP_Dll4_031.nd2	1396.82		515.387	515.387			1637.87		-268.66	0
104	GFP lo_mouse2_GFP_Dll4_031.nd2	1412.71		531.277	531.277			1425.7		-480.83	0
105	GFP lo_mouse2_GFP_Dll4_031.nd2	1087.19		205.757	205.757			1436.14		-470.39	0
106	GFP lo_mouse2_GFP_Dll4_031.nd2	1419.56		538.127	538.127			1394.31		-512.22	0
107	GFP lo_mouse2_GFP_Dll4_031.nd2	964.17		82.7367	82.7367			1214.33		-692.2	0
108	GFP lo_mouse2_GFP_Dll4_031.nd2	1055.42		173.987	173.987			1345.38		-561.15	0
109	GFP lo_mouse2_GFP_Dll4_031.nd2	1290.93		409.497	409.497			1490		-416.53	0
110	GFP lo_mouse2_GFP_Dll4_031.nd2	1298.88		417.447	417.447			1557.67		-348.86	0
111	GFP lo_mouse2_GFP_Dll4_031.nd2	1370.29		488.857	488.857			1571.94		-334.59	0
112	GFP lo_mouse2_GFP_Dll4_031.nd2	1359.87		478.437	478.437			1521.97		-384.56	0
113	GFP lo_mouse2_GFP_Dll4_031.nd2	1468.05		586.617	586.617			1510.3		-396.23	0
114	GFP lo_mouse2_GFP_Dll4_031.nd2	1325.97		444.537	444.537			1455.18		-451.35	0
115	GFP lo_mouse2_GFP_Dll4_032.nd2	1599.77		664.283	664.283			2017.74		79.6833	79.6833
116	GFP lo_mouse2_GFP_Dll4_032.nd2	1370.35		434.863	434.863			2021.57		83.5133	83.5133
117	GFP lo_mouse2_GFP_Dll4_032.nd2	1574.2		638.713	638.713			1960.67		22.6133	22.6133
118	GFP lo_mouse2_GFP_Dll4_032.nd2	1389.88		454.393	454.393			1962.75		24.6933	24.6933
119	GFP lo_mouse2_GFP_Dll4_032.nd2	1491.13		555.643	555.643			1969.76		31.7033	31.7033
120	GFP lo_mouse2_GFP_Dll4_032.nd2	1285.85		350.363	350.363			1906.78		-31.2767	0
121	GFP lo_mouse2_GFP_Dll4_032.nd2	1402.71		467.223	467.223			1885.49		-52.5667	0
122	GFP lo_mouse2_GFP_Dll4_032.nd2	1139.72		204.233	204.233			1713.62		-224.437	0
123	GFP lo_mouse2_GFP_Dll4_032.nd2	1080.59		145.103	145.103			1846.01		-92.0467	0
124	GFP lo_mouse2_GFP_Dll4_032.nd2	1324.53		389.043	389.043			1877.24		-60.8167	0
125	GFP lo_mouse2_GFP_Dll4_032.nd2	1455.51		520.023	520.023			1841.55		-96.5067	0
126	GFP lo_mouse2_GFP_Dll4_032.nd2	1267.32		331.833	331.833			1868.2		-69.8567	0
127	GFP lo_mouse2_GFP_Dll4_032.nd2	1426.46		490.973	490.973			1769.33		-168.727	0
128	GFP lo_mouse2_GFP_Dll4_033.nd2	1349.66	972.253	377.407	377.407			2088.6	1925.72	162.883	162.883
129	GFP lo_mouse2_GFP_Dll4_033.nd2	1461.36		489.107	489.107			1956.13		30.4133	30.4133
130	GFP lo_mouse2_GFP_Dll4_033.nd2	1253.8		281.547	281.547			1972.88		47.1633	47.1633
131	GFP lo_mouse2_GFP_Dll4_033.nd2	1399		426.747	426.747			1948.6		22.8833	22.8833
132	GFP lo_mouse2_GFP_Dll4_033.nd2	1216.56		244.307	244.307			1941.75		16.0333	16.0333
133	GFP lo_mouse2_GFP_Dll4_033.nd2	1335.57		363.317	363.317			1939.41		13.6933	13.6933
134	GFP lo_mouse2_GFP_Dll4_033.nd2	1355.8		383.547	383.547			1830.58		-95.1367	0
135	GFP lo_mouse2_GFP_Dll4_033.nd2	1174.73		202.477	202.477			1622.73		-302.987	0
136	GFP lo_mouse2_GFP_Dll4_033.nd2	1271.87		299.617	299.617			1634.84		-290.877	0
137	GFP lo_mouse2_GFP_Dll4_033.nd2	1133.54		161.287	161.287			1429.9		-495.817	0
138	GFP lo_mouse2_GFP_Dll4_033.nd2	1371.02		398.767	398.767			1864.84		-60.8767	0
139	GFP lo_mouse2_GFP_Dll4_033.nd2	1178.45		206.197	206.197			1812.15		-113.567	0
140	GFP lo_mouse2_GFP_Dll4_033.nd2	1354.69		382.437	382.437			1810.28		-115.437	0
141	GFP lo_mouse2_GFP_Dll4_033.nd2	1549.22		576.967	576.967			1859.06		-66.6567	0
142	GFP lo_mouse2_GFP_Dll4_033.nd2	1238.21		265.957	265.957			1830.66		-95.0567	0
143	GFP lo_mouse2_GFP_Dll4_033.nd2	1645.46		673.207	673.207			1994.81		69.0933	69.0933
144	GFP lo_mouse2_GFP_Dll4_033.nd2	1461.56		489.307	489.307			1804.31		-121.407	0
145	GFP lo_mouse2_GFP_Dll4_033.nd2	1406.64		434.387	434.387			1801.82		-123.897	0
146	GFP lo_mouse2_GFP_Dll4_034.nd2	1552.13	909.75	642.38	642.38			2171.67	1916.27	255.397	255.397
147	GFP lo_mouse2_GFP_Dll4_034.nd2	1391.55		481.8	481.8			2166.57		250.297	250.297
148	GFP lo_mouse2_GFP_Dll4_034.nd2	1272.21		362.46	362.46			2076.22		159.947	159.947
149	GFP lo_mouse2_GFP_Dll4_034.nd2	1305.99		396.24	396.24			2035.74		119.467	119.467
150	GFP lo_mouse2_GFP_Dll4_034.nd2	1112.42		202.67	202.67			1893.87		-22.4033	0
151	GFP lo_mouse2_GFP_Dll4_034.nd2	1561.29		651.54	651.54			2044.12		127.847	127.847
152	GFP lo_mouse2_GFP_Dll4_034.nd2	1520.55		610.8	610.8			2023.87		107.597	107.597
153	GFP lo_mouse2_GFP_Dll4_034.nd2	1570.54		660.79	660.79			1980.2		63.9267	63.9267
154	GFP lo_mouse2_GFP_Dll4_034.nd2	1435.69		525.94	525.94			1970.58		54.3067	54.3067
155	GFP lo_mouse2_GFP_Dll4_034.nd2	1415.95		506.2	506.2			1925.2		8.92667	8.92667
156	GFP lo_mouse2_GFP_Dll4_034.nd2	1356.49		446.74	446.74			1841.58		-74.6933	0
157	GFP lo_mouse2_GFP_Dll4_034.nd2	1177.75		268	268			1918.57		2.29667	2.29667
158	GFP lo_mouse2_GFP_Dll4_034.nd2	1198.51		288.76	288.76			1605.82		-310.453	0
159	GFP lo_mouse2_GFP_Dll4_034.nd2	1485.21		575.46	575.46			1760.79		-155.483	0
160	GFP lo_mouse2_GFP_Dll4_034.nd2	1316.39		406.64	406.64			2001.63		85.3567	85.3567
161	GFP lo_mouse2_GFP_Dll4_034.nd2	1274.76		365.01	365.01			1521.33		-394.943	0
162	GFP lo_mouse2_GFP_Dll4_034.nd2	1149.59		239.84	239.84			1954.95		38.6767	38.6767
163	GFP lo_mouse2_GFP_Dll4_034.nd2	1388.87		479.12	479.12			1869.79		-46.4833	0
164	GFP lo_mouse2_GFP_Dll4_034.nd2	1270.18		360.43	360.43			1931.68		15.4067	15.4067
165	GFP lo_mouse2_GFP_Dll4_034.nd2	1246.37		336.62	336.62			1941.45		25.1767	25.1767
166	GFP lo_mouse2_GFP_Dll4_034.nd2	1215.26		305.51	305.51			1788.03		-128.243	0
167	GFP lo_mouse2_GFP_Dll4_034.nd2	1085.99		176.24	176.24			1874.91		-41.3633	0
168	GFP lo_mouse2_GFP_Dll4_034.nd2	1133.23		223.48	223.48			1824.75		-91.5233	0
169	GFP lo_mouse2_GFP_Dll4_034.nd2	1528.07		618.32	618.32			1612.6		-303.673	0
170	GFP lo_mouse2_GFP_Dll4_035.nd2	1464.16		562.517	562.517			2186.21		295.21	295.21
171	GFP lo_mouse2_GFP_Dll4_035.nd2	1155.58		253.937	253.937			2007.33		116.33	116.33
172	GFP lo_mouse2_GFP_Dll4_035.nd2	1359.57		457.927	457.927			2094.78		203.78	203.78
173	GFP lo_mouse2_GFP_Dll4_035.nd2	1355.79		454.147	454.147			1924.32		33.32	33.32
174	GFP lo_mouse2_GFP_Dll4_035.nd2	1483.11		581.467	581.467			1913.94		22.94	22.94
175	GFP lo_mouse2_GFP_Dll4_035.nd2	1446.97		545.327	545.327			2121.48		230.48	230.48
176	GFP lo_mouse2_GFP_Dll4_035.nd2	1449.92		548.277	548.277			2140.51		249.51	249.51
177	GFP lo_mouse2_GFP_Dll4_035.nd2	1337.56		435.917	435.917			1562.09		-328.91	0
178	GFP lo_mouse2_GFP_Dll4_035.nd2	1557.56		655.917	655.917			1645.83		-245.17	0
179	GFP lo_mouse2_GFP_Dll4_035.nd2	1510.1		608.457	608.457			1735.63		-155.37	0
180	GFP lo_mouse2_GFP_Dll4_035.nd2	1419.12		517.477	517.477			2085.84		194.84	194.84
181	GFP lo_mouse2_GFP_Dll4_035.nd2	1539.21		637.567	637.567			2155.2		264.2	264.2
182	GFP lo_mouse2_GFP_Dll4_035.nd2	1472.04		570.397	570.397			2080.29		189.29	189.29
183	GFP lo_mouse2_GFP_Dll4_035.nd2	1519.8		618.157	618.157			2094.53		203.53	203.53
184	GFP lo_mouse2_GFP_Dll4_035.nd2	1525.91		624.267	624.267			1971.54		80.54	80.54
185	GFP lo_mouse2_GFP_Dll4_036.nd2	1590.17		697.143	697.143			1946.12		42.32	42.32
186	GFP lo_mouse2_GFP_Dll4_037.nd2	1202.81		294.56	294.56			2122.81		229.087	229.087
187	GFP lo_mouse2_GFP_Dll4_038.nd2	1253.76		397.71	397.71			1883.27		19.1633	19.1633
188	GFP lo_mouse2_GFP_Dll4_039.nd2	1316.74		384.4	384.4			2151.65		240.23	240.23
189	GFP lo_mouse2_GFP_Dll4_039.nd2	1621.75		689.41	689.41			2201.96		290.54	290.54
190	GFP lo_mouse2_GFP_Dll4_039.nd2	1537.57		605.23	605.23			2123.86		212.44	212.44
191	GFP lo_mouse2_GFP_Dll4_039.nd2	1461.96		529.62	529.62			2075.58		164.16	164.16
192	GFP lo_mouse2_GFP_Dll4_039.nd2	1301.59		369.25	369.25			2042.13		130.71	130.71
193	GFP lo_mouse2_GFP_Dll4_039.nd2	1258.86		326.52	326.52			1593.74		-317.68	0
194	GFP lo_mouse2_GFP_Dll4_040.nd2	1475.23		558.393	558.393			2207.24		271.31	271.31
195	GFP lo_mouse2_GFP_Dll4_040.nd2	1290.4		373.563	373.563			2230.19		294.26	294.26
196	GFP lo_mouse2_GFP_Dll4_040.nd2	1405.11		488.273	488.273			2171.56		235.63	235.63
197	GFP lo_mouse2_GFP_Dll4_040.nd2	1317.98		401.143	401.143			2005.08		69.15	69.15
198	GFP lo_mouse2_GFP_Dll4_040.nd2	1391.17		474.333	474.333			1881.69		-54.24	0
199	GFP lo_mouse2_GFP_Dll4_040.nd2	1168.32		251.483	251.483			2043.11		107.18	107.18
200	GFP lo_mouse2_GFP_Dll4_040.nd2	1368.99		452.153	452.153			1906.25		-29.68	0
201	GFP lo_mouse2_GFP_Dll4_040.nd2	1549.4		632.563	632.563			1894.51		-41.42	0
202	GFP lo_mouse2_GFP_Dll4_040.nd2	1490.46		573.623	573.623			2118.49		182.56	182.56
203	GFP lo_mouse2_GFP_Dll4_040.nd2	1381.4		464.563	464.563			1935.19		-0.74	0
204	GFP lo_mouse2_GFP_Dll4_041.nd2	1425.8		483.17	483.17			2219.64		287.903	287.903
205	GFP lo_mouse2_GFP_Dll4_041.nd2	1563.95		621.32	621.32			2207.74		276.003	276.003
206	GFP lo_mouse2_GFP_Dll4_041.nd2	1327.3		384.67	384.67			2200.87		269.133	269.133
207	GFP lo_mouse2_GFP_Dll4_041.nd2	1211.99		269.36	269.36			2150.62		218.883	218.883
208	GFP lo_mouse2_GFP_Dll4_041.nd2	1368.69		426.06	426.06			2038.33		106.593	106.593
209	GFP lo_mouse2_GFP_Dll4_041.nd2	1219.82		277.19	277.19			2051.5		119.763	119.763
210	GFP lo_mouse2_GFP_Dll4_041.nd2	1349.06		406.43	406.43			2166.57		234.833	234.833
211	GFP lo_mouse2_GFP_Dll4_041.nd2	1485.26		542.63	542.63			2099.31		167.573	167.573
212	GFP lo_mouse2_GFP_Dll4_041.nd2	1249.06		306.43	306.43			2125.35		193.613	193.613
213	GFP lo_mouse2_GFP_Dll4_041.nd2	1582.09		639.46	639.46			2047.03		115.293	115.293
214	GFP lo_mouse2_GFP_Dll4_041.nd2	1394.28		451.65	451.65			2092.55		160.813	160.813
215	GFP lo_mouse2_GFP_Dll4_041.nd2	1490.06		547.43	547.43			2177.45		245.713	245.713
216	GFP lo_mouse2_GFP_Dll4_041.nd2	1483.75		541.12	541.12			2183.84		252.103	252.103
217	GFP lo_mouse2_GFP_Dll4_041.nd2	1388.12		445.49	445.49			1995.2		63.4633	63.4633
218	GFP lo_mouse2_GFP_Dll4_041.nd2	1491.7		549.07	549.07			2138.76		207.023	207.023
219	GFP lo_mouse2_GFP_Dll4_041.nd2	1332.22		389.59	389.59			1980.01		48.2733	48.2733
220	GFP lo_mouse2_GFP_Dll4_041.nd2	1231.83		289.2	289.2			2164.33		232.593	232.593
221	GFP lo_mouse2_GFP_Dll4_041.nd2	1457.89		515.26	515.26			2043.15		111.413	111.413
222	GFP lo_mouse2_GFP_Dll4_041.nd2	1503.66		561.03	561.03			1928.74		-2.99667	0
223	GFP lo_mouse2_GFP_Dll4_041.nd2	1247.08		304.45	304.45			2116.07		184.333	184.333
224	GFP lo_mouse2_GFP_Dll4_041.nd2	1314.72		372.09	372.09			2008.42		76.6833	76.6833
225	GFP lo_mouse2_GFP_Dll4_041.nd2	1330.13		387.5	387.5			2033.25		101.513	101.513
226	GFP lo_mouse2_GFP_Dll4_041.nd2	1592.6		649.97	649.97			2024.53		92.7933	92.7933
227	GFP lo_mouse2_GFP_Dll4_041.nd2	1515.77		573.14	573.14			2015.83		84.0933	84.0933
228	GFP lo_mouse2_GFP_Dll4_041.nd2	1291.34		348.71	348.71			1958.58		26.8433	26.8433
229	GFP lo_mouse2_GFP_Dll4_041.nd2	1186.83		244.2	244.2			1790.89		-140.847	0
230	GFP lo_mouse2_GFP_Dll4_041.nd2	1345.08		402.45	402.45			1721.28		-210.457	0
231	GFP lo_mouse2_GFP_Dll4_041.nd2	1226.79		284.16	284.16			1832.99		-98.7467	0
232	GFP lo_mouse2_GFP_Dll4_041.nd2	1289.72		347.09	347.09			1904.24		-27.4967	0
233	GFP lo_mouse2_GFP_Dll4_042.nd2	1493.85	997.98	495.87	495.87			2228.29	1949.6	278.687	278.687
234	GFP lo_mouse2_GFP_Dll4_042.nd2	1613.5		615.52	615.52			2149.08		199.477	199.477
235	GFP lo_mouse2_GFP_Dll4_042.nd2	1188.37		190.39	190.39			2178.91		229.307	229.307
236	GFP lo_mouse2_GFP_Dll4_042.nd2	1484.59		486.61	486.61			2041.37		91.7667	91.7667
237	GFP lo_mouse2_GFP_Dll4_042.nd2	1629.75		631.77	631.77			2031.74		82.1367	82.1367
238	GFP lo_mouse2_GFP_Dll4_042.nd2	1683.04		685.06	685.06			1783.03		-166.573	0
239	GFP lo_mouse2_GFP_Dll4_042.nd2	1545.85		547.87	547.87			1877.21		-72.3933	0
240	GFP lo_mouse2_GFP_Dll4_042.nd2	1349.4		351.42	351.42			1977.25		27.6467	27.6467
241	GFP lo_mouse2_GFP_Dll4_042.nd2	1369.79		371.81	371.81			1867.08		-82.5233	0
242	GFP lo_mouse2_GFP_Dll4_042.nd2	1235.61		237.63	237.63			1503.13		-446.473	0
243	GFP lo_mouse2_GFP_Dll4_042.nd2	1473.4		475.42	475.42			2067.77		118.167	118.167
244	GFP lo_mouse2_GFP_Dll4_042.nd2	1569.15		571.17	571.17			1842.7		-106.903	0
245	GFP lo_mouse2_GFP_Dll4_042.nd2	1617.01		619.03	619.03			1842.87		-106.733	0
246	GFP lo_mouse2_GFP_Dll4_042.nd2	1193.13		195.15	195.15			2038.95		89.3467	89.3467
247	GFP lo_mouse2_GFP_Dll4_042.nd2	1396.07		398.09	398.09			1938.83		-10.7733	0
248	GFP lo_mouse2_GFP_Dll4_042.nd2	1301.36		303.38	303.38			1838.74		-110.863	0
249	GFP lo_mouse2_GFP_Dll4_042.nd2	1353.1		355.12	355.12			1960.6		10.9967	10.9967
250	GFP lo_mouse2_GFP_Dll4_042.nd2	1340.97		342.99	342.99			1933.75		-15.8533	0
251	GFP lo_mouse2_GFP_Dll4_042.nd2	1199.31		201.33	201.33			1911.85		-37.7533	0

## Sheet: GFP hi_mouse3
					Dll4 mean intensity						Pax7nGFP mean intensity
Item	Source	Dll4 (TxRed) mean intensity	TxRed background	Dll4 mean intensity	Corrected minus to zeros			Pax7nGFP (GFP) mean intensity	GFP background	Pax7nGFP mean intensity	Corrected minus to zeros
1	GFP hi_mouse3_GFP_Dll4_043.nd2	2152.67	1167.02	985.65	985.65			2153.04	1769.2	383.84	383.84
2	GFP hi_mouse3_GFP_Dll4_043.nd2	2147.81		980.79	980.79			2160.23		391.03	391.03
3	GFP hi_mouse3_GFP_Dll4_043.nd2	2101.19		934.17	934.17			2153.36		384.16	384.16
4	GFP hi_mouse3_GFP_Dll4_043.nd2	1998.55		831.53	831.53			2006.56		237.36	237.36
5	GFP hi_mouse3_GFP_Dll4_043.nd2	2181.54		1014.52	1014.52			2132.36		363.16	363.16
6	GFP hi_mouse3_GFP_Dll4_043.nd2	2000.5		833.48	833.48			1975.75		206.55	206.55
7	GFP hi_mouse3_GFP_Dll4_043.nd2	1973.74		806.72	806.72			2041.91		272.71	272.71
8	GFP hi_mouse3_GFP_Dll4_043.nd2	1682.65		515.63	515.63			2064.58		295.38	295.38
9	GFP hi_mouse3_GFP_Dll4_043.nd2	1633.01		465.99	465.99			2037.88		268.68	268.68
10	GFP hi_mouse3_GFP_Dll4_044.nd2	1562	1145.19	416.807	416.807			1850.7	1437.23	413.473	413.473
11	GFP hi_mouse3_GFP_Dll4_044.nd2	2321.24		1176.05	1176.05			1762.28		325.053	325.053
12	GFP hi_mouse3_GFP_Dll4_044.nd2	1807.21		662.017	662.017			1681.82		244.593	244.593
13	GFP hi_mouse3_GFP_Dll4_045.nd2	1745.6	1204.15	541.447	541.447			2100.24	1770.48	329.76	329.76
14	GFP hi_mouse3_GFP_Dll4_045.nd2	2250.22		1046.07	1046.07			2000.66		230.18	230.18
15	GFP hi_mouse3_GFP_Dll4_046.nd2	1986	1195.89	790.11	790.11			2200.26	1815.75	384.51	384.51
16	GFP hi_mouse3_GFP_Dll4_047.nd2	2003.16		823.833	823.833			2056.33		216.8	216.8
17	GFP hi_mouse3_GFP_Dll4_048.nd2	2294.22	1172.43	1121.79	1121.79			2099.15	1814.56	284.587	284.587
18	GFP hi_mouse3_GFP_Dll4_048.nd2	2163.08		990.647	990.647			2132.61		318.047	318.047
19	GFP hi_mouse3_GFP_Dll4_048.nd2	1507.51		335.077	335.077			2020.59		206.027	206.027
20	GFP hi_mouse3_GFP_Dll4_048.nd2	2180.7		1008.27	1008.27			2117.81		303.247	303.247
21	GFP hi_mouse3_GFP_Dll4_048.nd2	1885.67		713.237	713.237			2020.98		206.417	206.417
22	GFP hi_mouse3_GFP_Dll4_049.nd2	1807.82		617.767	617.767			2038.36		217.897	217.897
23	GFP hi_mouse3_GFP_Dll4_049.nd2	1477.67		287.617	287.617			2037.62		217.157	217.157
24	GFP hi_mouse3_GFP_Dll4_050.nd2	1709.98	1193.88	516.103	516.103			2124.83	1815.96	308.87	308.87
25	GFP hi_mouse3_GFP_Dll4_050.nd2	1483.44		289.563	289.563			2095.25		279.29	279.29
26	GFP hi_mouse3_GFP_Dll4_050.nd2	1965.98		772.103	772.103			2077.58		261.62	261.62
27	GFP hi_mouse3_GFP_Dll4_051.nd2	2061.71	1194.67	867.04	867.04			2110.27	1824.16	286.11	286.11
28	GFP hi_mouse3_GFP_Dll4_051.nd2	1836.99		642.32	642.32			2066.4		242.24	242.24
29	GFP hi_mouse3_GFP_Dll4_051.nd2	2118.44		923.77	923.77			2149.56		325.4	325.4
30	GFP hi_mouse3_GFP_Dll4_051.nd2	2237.1		1042.43	1042.43			2126.35		302.19	302.19
31	GFP hi_mouse3_GFP_Dll4_051.nd2	1404.53		209.86	209.86			2047.43		223.27	223.27
32	GFP hi_mouse3_GFP_Dll4_051.nd2	2020.06		825.39	825.39			2064.26		240.1	240.1
33	GFP hi_mouse3_GFP_Dll4_052.nd2	1526.61		346.123	346.123			2075.32		269.077	269.077
34	GFP hi_mouse3_GFP_Dll4_053.nd2	1908.55	1181.91	726.637	726.637			2088.5	1782.66	305.837	305.837
35	GFP hi_mouse3_GFP_Dll4_053.nd2	1928.14		746.227	746.227			2128.86		346.197	346.197
36	GFP hi_mouse3_GFP_Dll4_053.nd2	1896.51		714.597	714.597			2049.57		266.907	266.907
37	GFP hi_mouse3_GFP_Dll4_053.nd2	1748.76		566.847	566.847			1994.88		212.217	212.217
38	GFP hi_mouse3_GFP_Dll4_053.nd2	1896.38		714.467	714.467			2072.86		290.197	290.197
39	GFP hi_mouse3_GFP_Dll4_053.nd2	2108.74		926.827	926.827			1986.92		204.257	204.257
40	GFP hi_mouse3_GFP_Dll4_055.nd2	1868.61	1122.85	745.757	745.757			1774.24	1448.66	325.583	325.583
41	GFP hi_mouse3_GFP_Dll4_055.nd2	1695.94		573.087	573.087			1753.42		304.763	304.763
42	GFP hi_mouse3_GFP_Dll4_056.nd2	1899.95	1196.16	703.79	703.79			2078.3	1820.64	257.663	257.663
43	GFP hi_mouse3_GFP_Dll4_056.nd2	1774.9		578.74	578.74			2102.75		282.113	282.113
44	GFP hi_mouse3_GFP_Dll4_056.nd2	2028.29		832.13	832.13			2112.47		291.833	291.833
45	GFP hi_mouse3_GFP_Dll4_056.nd2	1954.63		758.47	758.47			2101.22		280.583	280.583
46	GFP hi_mouse3_GFP_Dll4_056.nd2	2003.06		806.9	806.9			2112.19		291.553	291.553
47	GFP hi_mouse3_GFP_Dll4_056.nd2	1405.42		209.26	209.26			2025.75		205.113	205.113
48	GFP hi_mouse3_GFP_Dll4_057.nd2	1961.09	1135.54	825.55	825.55			1569.14	1320.51	248.627	248.627
49	GFP hi_mouse3_GFP_Dll4_057.nd2	2079.39		943.85	943.85			1554.33		233.817	233.817
50	GFP hi_mouse3_GFP_Dll4_057.nd2	1646.68		511.14	511.14			1639.04		318.527	318.527
51	GFP hi_mouse3_GFP_Dll4_057.nd2	2051.19		915.65	915.65			1625.38		304.867	304.867
52	GFP hi_mouse3_GFP_Dll4_058.nd2	2195.04	1176.45	1018.59	1018.59			1943.74	1733.71	210.033	210.033
53	GFP hi_mouse3_GFP_Dll4_058.nd2	1679.5		503.053	503.053			1955.82		222.113	222.113
54	GFP hi_mouse3_GFP_Dll4_058.nd2	1814.56		638.113	638.113			1935.26		201.553	201.553
55	GFP hi_mouse3_GFP_Dll4_059.nd2	2095.35	1175.6	919.747	919.747			2161.25	1824.97	336.277	336.277
56	GFP hi_mouse3_GFP_Dll4_059.nd2	1590.41		414.807	414.807			2095.84		270.867	270.867
57	GFP hi_mouse3_GFP_Dll4_059.nd2	1986.48		810.877	810.877			2129.52		304.547	304.547
58	GFP hi_mouse3_GFP_Dll4_059.nd2	1716.87		541.267	541.267			2090.88		265.907	265.907
59	GFP hi_mouse3_GFP_Dll4_059.nd2	1637.3		461.697	461.697			2185.41		360.437	360.437
60	GFP hi_mouse3_GFP_Dll4_059.nd2	2180.86		1005.26	1005.26			2127.99		303.017	303.017
61	GFP hi_mouse3_GFP_Dll4_059.nd2	1939.91		764.307	764.307			2135.19		310.217	310.217
62	GFP hi_mouse3_GFP_Dll4_059.nd2	1457.36		281.757	281.757			2157.1		332.127	332.127
63	GFP hi_mouse3_GFP_Dll4_059.nd2	1916.98		741.377	741.377			2040.12		215.147	215.147
64	GFP hi_mouse3_GFP_Dll4_059.nd2	2025.19		849.587	849.587			2039.23		214.257	214.257
65	GFP hi_mouse3_GFP_Dll4_059.nd2	1930.46		754.857	754.857			2044.37		219.397	219.397
66	GFP hi_mouse3_GFP_Dll4_059.nd2	1827.33		651.727	651.727			2046.91		221.937	221.937
67	GFP hi_mouse3_GFP_Dll4_059.nd2	1419.45		243.847	243.847			2035.86		210.887	210.887
68	GFP hi_mouse3_GFP_Dll4_060.nd2	2240.78	1184.77	1056.01	1056.01			2143.82	1832.37	311.45	311.45
69	GFP hi_mouse3_GFP_Dll4_060.nd2	1817.03		632.263	632.263			2148.97		316.6	316.6
70	GFP hi_mouse3_GFP_Dll4_060.nd2	2004.8		820.033	820.033			2162.46		330.09	330.09
71	GFP hi_mouse3_GFP_Dll4_060.nd2	2151.73		966.963	966.963			2160.77		328.4	328.4
72	GFP hi_mouse3_GFP_Dll4_060.nd2	1451.41		266.643	266.643			2112.72		280.35	280.35
73	GFP hi_mouse3_GFP_Dll4_060.nd2	1880.48		695.713	695.713			2102.19		269.82	269.82
74	GFP hi_mouse3_GFP_Dll4_060.nd2	1712.65		527.883	527.883			2036.7		204.33	204.33
75	GFP hi_mouse3_GFP_Dll4_061.nd2	1624.11	1177.24	446.873	446.873			2205.78	1834.7	371.077	371.077
76	GFP hi_mouse3_GFP_Dll4_061.nd2	1760.79		583.553	583.553			2143.18		308.477	308.477
77	GFP hi_mouse3_GFP_Dll4_061.nd2	1878.58		701.343	701.343			2072.15		237.447	237.447
78	GFP hi_mouse3_GFP_Dll4_061.nd2	1635.72		458.483	458.483			2115.37		280.667	280.667
79	GFP hi_mouse3_GFP_Dll4_062.nd2	1848.4		808.567	808.567			2177.09		349.167	349.167
80	GFP hi_mouse3_GFP_Dll4_062.nd2	1990.92		951.087	951.087			2094.52		266.597	266.597
81	GFP hi_mouse3_GFP_Dll4_062.nd2	1923.74		883.907	883.907			2042.92		214.997	214.997
82	GFP hi_mouse3_GFP_Dll4_062.nd2	1999.36		959.527	959.527			2066.47		238.547	238.547

## Sheet: GFP med_mouse3
					Dll4 mean intensity						Pax7nGFP mean intensity
Item	Source	Dll4 (TxRed) mean intensity	TxRed background	Dll4 mean intensity	Corrected minus to zeros			Pax7nGFP (GFP) mean intensity	GFP background	Pax7nGFP mean intensity	Corrected minus to zeros
1	GFP med_mouse3_GFP_Dll4_046.nd2	1571.34	907.42	663.92	663.92			2092.83	1813.46	279.373	279.373
2	GFP med_mouse3_GFP_Dll4_046.nd2	1488.09		580.67	580.67			1991.08		177.623	177.623
3	GFP med_mouse3_GFP_Dll4_046.nd2	1700.27		792.85	792.85			1919.5		106.043	106.043
4	GFP med_mouse3_GFP_Dll4_046.nd2	1466.54		559.12	559.12			2023.8		210.343	210.343
5	GFP med_mouse3_GFP_Dll4_046.nd2	1149.9		242.48	242.48			1965.01		151.553	151.553
6	GFP med_mouse3_GFP_Dll4_047.nd2	1747.08	942.683	804.397	804.397			1927.65	1710.06	217.59	217.59
7	GFP med_mouse3_GFP_Dll4_047.nd2	1633.7		691.017	691.017			1878.05		167.99	167.99
8	GFP med_mouse3_GFP_Dll4_047.nd2	1851.96		909.277	909.277			1887.12		177.06	177.06
9	GFP med_mouse3_GFP_Dll4_047.nd2	1643.15		700.467	700.467			1914.83		204.77	204.77
10	GFP med_mouse3_GFP_Dll4_047.nd2	1623.21		680.527	680.527			1969.46		259.4	259.4
11	GFP med_mouse3_GFP_Dll4_047.nd2	1636.87		694.187	694.187			1928.93		218.87	218.87
12	GFP med_mouse3_GFP_Dll4_047.nd2	1290.63		347.947	347.947			1953.83		243.77	243.77
13	GFP med_mouse3_GFP_Dll4_047.nd2	1503.95		561.267	561.267			1924.65		214.59	214.59
14	GFP med_mouse3_GFP_Dll4_047.nd2	1678.28		735.597	735.597			1882.4		172.34	172.34
15	GFP med_mouse3_GFP_Dll4_048.nd2	1844.84	956.76	888.08	888.08			2051.39	1817.81	233.583	233.583
16	GFP med_mouse3_GFP_Dll4_048.nd2	1368.74		411.98	411.98			1949.43		131.623	131.623
17	GFP med_mouse3_GFP_Dll4_048.nd2	1670.9		714.14	714.14			1987.11		169.303	169.303
18	GFP med_mouse3_GFP_Dll4_048.nd2	1915.65		958.89	958.89			2000.26		182.453	182.453
19	GFP med_mouse3_GFP_Dll4_049.nd2	1470.66		580.297	580.297			1994.08		289.903	289.903
20	GFP med_mouse3_GFP_Dll4_049.nd2	1173.5		283.137	283.137			1890.92		186.743	186.743
21	GFP med_mouse3_GFP_Dll4_049.nd2	1072.58		182.217	182.217			1905.69		201.513	201.513
22	GFP med_mouse3_GFP_Dll4_049.nd2	1271.19		380.827	380.827			1809.4		105.223	105.223
23	GFP med_mouse3_GFP_Dll4_049.nd2	1220.95		330.587	330.587			1930.69		226.513	226.513
24	GFP med_mouse3_GFP_Dll4_049.nd2	1336.39		446.027	446.027			1902.2		198.023	198.023
25	GFP med_mouse3_GFP_Dll4_049.nd2	1440.7		550.337	550.337			1982.63		278.453	278.453
26	GFP med_mouse3_GFP_Dll4_049.nd2	1459.39		569.027	569.027			1949.32		245.143	245.143
27	GFP med_mouse3_GFP_Dll4_050.nd2	1520.63		574.223	574.223			1907.91		173.793	173.793
28	GFP med_mouse3_GFP_Dll4_050.nd2	1446.95		500.543	500.543			1896.94		162.823	162.823
29	GFP med_mouse3_GFP_Dll4_050.nd2	1696.06		749.653	749.653			1885.46		151.343	151.343
30	GFP med_mouse3_GFP_Dll4_051.nd2	1797.1	947.73	849.37	849.37			2077.12	1823.64	253.477	253.477
31	GFP med_mouse3_GFP_Dll4_051.nd2	1459.33		511.6	511.6			2093.03		269.387	269.387
32	GFP med_mouse3_GFP_Dll4_051.nd2	1731.8		784.07	784.07			2004.09		180.447	180.447
33	GFP med_mouse3_GFP_Dll4_051.nd2	1294.35		346.62	346.62			1971.2		147.557	147.557
34	GFP med_mouse3_GFP_Dll4_051.nd2	1270.18		322.45	322.45			2011.91		188.267	188.267
35	GFP med_mouse3_GFP_Dll4_051.nd2	1592.07		644.34	644.34			2008.58		184.937	184.937
36	GFP med_mouse3_GFP_Dll4_051.nd2	1335.21		387.48	387.48			1981.66		158.017	158.017
37	GFP med_mouse3_GFP_Dll4_052.nd2	1561.69	951.243	610.447	610.447			2062.58	1798.96	263.617	263.617
38	GFP med_mouse3_GFP_Dll4_052.nd2	1426		474.757	474.757			1922.78		123.817	123.817
39	GFP med_mouse3_GFP_Dll4_052.nd2	1317.95		366.707	366.707			1947.16		148.197	148.197
40	GFP med_mouse3_GFP_Dll4_052.nd2	1159.61		208.367	208.367			1934.08		135.117	135.117
41	GFP med_mouse3_GFP_Dll4_053.nd2	1932.3	1015.44	916.857	916.857			2145.27	1874.03	271.243	271.243
42	GFP med_mouse3_GFP_Dll4_053.nd2	1759.53		744.087	744.087			2108.42		234.393	234.393
43	GFP med_mouse3_GFP_Dll4_053.nd2	1788.66		773.217	773.217			2015.05		141.023	141.023
44	GFP med_mouse3_GFP_Dll4_053.nd2	1282.47		267.027	267.027			2024.01		149.983	149.983
45	GFP med_mouse3_GFP_Dll4_053.nd2	1972.89		957.447	957.447			2096.99		222.963	222.963
46	GFP med_mouse3_GFP_Dll4_054.nd2	1379.37	993.983	385.387	385.387			2074.34	1837.04	237.303	237.303
47	GFP med_mouse3_GFP_Dll4_054.nd2	1731.99		738.007	738.007			2178.65		341.613	341.613
48	GFP med_mouse3_GFP_Dll4_054.nd2	1557.86		563.877	563.877			2096.65		259.613	259.613
49	GFP med_mouse3_GFP_Dll4_054.nd2	1712.24		718.257	718.257			2078.98		241.943	241.943
50	GFP med_mouse3_GFP_Dll4_054.nd2	1461.53		467.547	467.547			2120.33		283.293	283.293
51	GFP med_mouse3_GFP_Dll4_054.nd2	1801.17		807.187	807.187			2101.96		264.923	264.923
52	GFP med_mouse3_GFP_Dll4_054.nd2	1314.4		320.417	320.417			2120.04		283.003	283.003
53	GFP med_mouse3_GFP_Dll4_054.nd2	1536.64		542.657	542.657			1965.8		128.763	128.763
54	GFP med_mouse3_GFP_Dll4_055.nd2	1320.94		335.85	335.85			2034.44		194.243	194.243
55	GFP med_mouse3_GFP_Dll4_055.nd2	1248.76		263.67	263.67			2004.95		164.753	164.753
56	GFP med_mouse3_GFP_Dll4_055.nd2	1520.31		535.22	535.22			2128.86		288.663	288.663
57	GFP med_mouse3_GFP_Dll4_055.nd2	1704.52		719.43	719.43			1950.45		110.253	110.253
58	GFP med_mouse3_GFP_Dll4_055.nd2	1446.47		461.38	461.38			1979.41		139.213	139.213
59	GFP med_mouse3_GFP_Dll4_056.nd2	1585.77	968.94	616.83	616.83			1705.17	1510.33	194.84	194.84
60	GFP med_mouse3_GFP_Dll4_056.nd2	1559.98		591.04	591.04			1689.94		179.61	179.61
61	GFP med_mouse3_GFP_Dll4_056.nd2	1590.92		621.98	621.98			1615.46		105.13	105.13
62	GFP med_mouse3_GFP_Dll4_056.nd2	1253.8		284.86	284.86			1619.82		109.49	109.49
63	GFP med_mouse3_GFP_Dll4_056.nd2	1510.44		541.5	541.5			1664.05		153.72	153.72
64	GFP med_mouse3_GFP_Dll4_056.nd2	1546.58		577.64	577.64			1637.22		126.89	126.89
65	GFP med_mouse3_GFP_Dll4_056.nd2	1065.5		96.56	96.56			1657.71		147.38	147.38
66	GFP med_mouse3_GFP_Dll4_056.nd2	1265.87		296.93	296.93			1618.24		107.91	107.91
67	GFP med_mouse3_GFP_Dll4_057.nd2	1723.42	872.023	851.397	851.397			1880.36	1704.23	176.133	176.133
68	GFP med_mouse3_GFP_Dll4_057.nd2	1524.41		652.387	652.387			1833.17		128.943	128.943
69	GFP med_mouse3_GFP_Dll4_057.nd2	1238.69		366.667	366.667			1928.93		224.703	224.703
70	GFP med_mouse3_GFP_Dll4_057.nd2	1660.61		788.587	788.587			1993.4		289.173	289.173
71	GFP med_mouse3_GFP_Dll4_057.nd2	1476.24		604.217	604.217			1933.65		229.423	229.423
72	GFP med_mouse3_GFP_Dll4_057.nd2	1203.37		331.347	331.347			1999.02		294.793	294.793
73	GFP med_mouse3_GFP_Dll4_057.nd2	1300.36		428.337	428.337			2004.78		300.553	300.553
74	GFP med_mouse3_GFP_Dll4_057.nd2	1746.95		874.927	874.927			1981.13		276.903	276.903
75	GFP med_mouse3_GFP_Dll4_057.nd2	1561.77		689.747	689.747			1912.67		208.443	208.443
76	GFP med_mouse3_GFP_Dll4_057.nd2	1595.33		723.307	723.307			1915.37		211.143	211.143
77	GFP med_mouse3_GFP_Dll4_058.nd2	1291.27	989.783	419.247	419.247			2030.53	1881.77	326.303	326.303
78	GFP med_mouse3_GFP_Dll4_058.nd2	1448.12		576.097	576.097			1899.99		195.763	195.763
79	GFP med_mouse3_GFP_Dll4_058.nd2	1553.52		681.497	681.497			1994.49		290.263	290.263
80	GFP med_mouse3_GFP_Dll4_058.nd2	1437.2		565.177	565.177			1992.18		287.953	287.953
81	GFP med_mouse3_GFP_Dll4_058.nd2	1387.02		514.997	514.997			1863.02		158.793	158.793
82	GFP med_mouse3_GFP_Dll4_058.nd2	1492.06		620.037	620.037			1870.69		166.463	166.463
83	GFP med_mouse3_GFP_Dll4_058.nd2	1659.19		787.167	787.167			2079.36		375.133	375.133
84	GFP med_mouse3_GFP_Dll4_058.nd2	1481.79		609.767	609.767			1986.36		282.133	282.133
85	GFP med_mouse3_GFP_Dll4_058.nd2	1488.43		616.407	616.407			1852.78		148.553	148.553
86	GFP med_mouse3_GFP_Dll4_058.nd2	1277.87		405.847	405.847			1960.64		256.413	256.413
87	GFP med_mouse3_GFP_Dll4_059.nd2	1410.71		400.687	400.687			2047.37		172.087	172.087
88	GFP med_mouse3_GFP_Dll4_059.nd2	1481.45		471.427	471.427			2038.65		163.367	163.367
89	GFP med_mouse3_GFP_Dll4_059.nd2	1532.25		522.227	522.227			2023.89		148.607	148.607
90	GFP med_mouse3_GFP_Dll4_059.nd2	1175.26		165.237	165.237			2013.46		138.177	138.177
91	GFP med_mouse3_GFP_Dll4_059.nd2	1803.23		793.207	793.207			2058.32		183.037	183.037
92	GFP med_mouse3_GFP_Dll4_059.nd2	1592.19		582.167	582.167			1990.63		115.347	115.347
93	GFP med_mouse3_GFP_Dll4_059.nd2	1634.79		624.767	624.767			1977.93		102.647	102.647
94	GFP med_mouse3_GFP_Dll4_060.nd2	1698.42	1018.29	680.127	680.127			2193.62	1865.9	327.717	327.717
95	GFP med_mouse3_GFP_Dll4_060.nd2	1405.11		386.817	386.817			2075.86		209.957	209.957
96	GFP med_mouse3_GFP_Dll4_061.nd2	1746.37	1023.17	723.2	723.2			2122.35	1885.22	237.133	237.133
97	GFP med_mouse3_GFP_Dll4_061.nd2	1616.51		593.34	593.34			2039.57		154.353	154.353
98	GFP med_mouse3_GFP_Dll4_061.nd2	1468.48		445.31	445.31			2114.42		229.203	229.203
99	GFP med_mouse3_GFP_Dll4_062.nd2	1805.54	935.803	869.737	869.737			2181.65	1836.64	345.007	345.007
100	GFP med_mouse3_GFP_Dll4_062.nd2	1660.48		724.677	724.677			2046.3		209.657	209.657
101	GFP med_mouse3_GFP_Dll4_062.nd2	1413.21		477.407	477.407			2192.87		356.227	356.227
102	GFP med_mouse3_GFP_Dll4_062.nd2	1632.87		697.067	697.067			2189.5		352.857	352.857
103	GFP med_mouse3_GFP_Dll4_062.nd2	1453.2		517.397	517.397			2146.46		309.817	309.817
104	GFP med_mouse3_GFP_Dll4_062.nd2	1598.47		662.667	662.667			1952.91		116.267	116.267
105	GFP med_mouse3_GFP_Dll4_062.nd2	1300.16		364.357	364.357			1937.72		101.077	101.077
106	GFP med_mouse3_GFP_Dll4_062.nd2	1528.04		592.237	592.237			1999.67		163.027	163.027
107	GFP med_mouse3_GFP_Dll4_062.nd2	1320.21		384.407	384.407			2096.8		260.157	260.157
108	GFP med_mouse3_GFP_Dll4_063.nd2	1620.55	976.457	644.093	644.093			2074.61	1834.83	239.783	239.783
109	GFP med_mouse3_GFP_Dll4_063.nd2	1489.22		512.763	512.763			1997.32		162.493	162.493
110	GFP med_mouse3_GFP_Dll4_063.nd2	1463.52		487.063	487.063			2097.83		263.003	263.003
111	GFP med_mouse3_GFP_Dll4_063.nd2	1559.84		583.383	583.383			2004.57		169.743	169.743
112	GFP med_mouse3_GFP_Dll4_063.nd2	1374.76		398.303	398.303			2009.57		174.743	174.743
113	GFP med_mouse3_GFP_Dll4_063.nd2	1537.08		560.623	560.623			1953.47		118.643	118.643
114	GFP med_mouse3_GFP_Dll4_063.nd2	1543.96		567.503	567.503			1956.18		121.353	121.353
115	GFP med_mouse3_GFP_Dll4_063.nd2	1496.2		519.743	519.743			1936.57		101.743	101.743
116	GFP med_mouse3_GFP_Dll4_063.nd2	1512.33		535.873	535.873			2044.38		209.553	209.553
117	GFP med_mouse3_GFP_Dll4_063.nd2	1450.52		474.063	474.063			1973.06		138.233	138.233
118	GFP med_mouse3_GFP_Dll4_064.nd2	1595.58	959.067	636.513	636.513			2028.35	1767.98	260.367	260.367
119	GFP med_mouse3_GFP_Dll4_064.nd2	1684.01		724.943	724.943			1906.94		138.957	138.957
120	GFP med_mouse3_GFP_Dll4_064.nd2	1539.38		580.313	580.313			2037.4		269.417	269.417
121	GFP med_mouse3_GFP_Dll4_064.nd2	1520.04		560.973	560.973			2001.15		233.167	233.167
122	GFP med_mouse3_GFP_Dll4_064.nd2	1498.36		539.293	539.293			2090.56		322.577	322.577
123	GFP med_mouse3_GFP_Dll4_064.nd2	1168.85		209.783	209.783			1904.63		136.647	136.647
124	GFP med_mouse3_GFP_Dll4_064.nd2	1412.19		453.123	453.123			1882.97		114.987	114.987
125	GFP med_mouse3_GFP_Dll4_064.nd2	1472.04		512.973	512.973			1869.3		101.317	101.317
126	GFP med_mouse3_GFP_Dll4_064.nd2	1398.9		439.833	439.833			1918.83		150.847	150.847
127	GFP med_mouse3_GFP_Dll4_064.nd2	1444.73		485.663	485.663			1918.23		150.247	150.247

## Sheet: GFP low_mouse3
					Dll4 mean intensity						Pax7nGFP mean intensity
Item	Source	Dll4 (TxRed) mean intensity	TxRed background	Dll4 mean intensity	Corrected minus to zeros			Pax7nGFP (GFP) mean intensity	GFP background	Pax7nGFP mean intensity	Corrected minus to zeros
1	GFP lo_mouse3_GFP_Dll4_043.nd2	1538.23	1001.61	536.623	536.623			2168.92	1929.07	239.85	239.85
2	GFP lo_mouse3_GFP_Dll4_043.nd2	1303.34		301.733	301.733			2112.13		183.06	183.06
3	GFP lo_mouse3_GFP_Dll4_043.nd2	1678.28		676.673	676.673			2126.99		197.92	197.92
4	GFP lo_mouse3_GFP_Dll4_043.nd2	1245.06		243.453	243.453			2156.28		227.21	227.21
5	GFP lo_mouse3_GFP_Dll4_043.nd2	1618.78		617.173	617.173			2109.12		180.05	180.05
6	GFP lo_mouse3_GFP_Dll4_043.nd2	1665.31		663.703	663.703			2059.65		130.58	130.58
7	GFP lo_mouse3_GFP_Dll4_043.nd2	1652.99		651.383	651.383			1892.04		-37.03	0
8	GFP lo_mouse3_GFP_Dll4_043.nd2	1511.11		509.503	509.503			1842.17		-86.9	0
9	GFP lo_mouse3_GFP_Dll4_043.nd2	1427.71		426.103	426.103			1985.31		56.24	56.24
10	GFP lo_mouse3_GFP_Dll4_043.nd2	1396.87		395.263	395.263			1955.83		26.76	26.76
11	GFP lo_mouse3_GFP_Dll4_043.nd2	1440.82		439.213	439.213			1740.94		-188.13	0
12	GFP lo_mouse3_GFP_Dll4_043.nd2	1282.97		281.363	281.363			1805.01		-124.06	0
13	GFP lo_mouse3_GFP_Dll4_043.nd2	1225.66		224.053	224.053			1668.28		-260.79	0
14	GFP lo_mouse3_GFP_Dll4_043.nd2	1356.44		354.833	354.833			1479.65		-449.42	0
15	GFP lo_mouse3_GFP_Dll4_043.nd2	1493.22		491.613	491.613			1869.96		-59.11	0
16	GFP lo_mouse3_GFP_Dll4_043.nd2	1287.66		286.053	286.053			1819.75		-109.32	0
17	GFP lo_mouse3_GFP_Dll4_043.nd2	1287.87		286.263	286.263			1724.51		-204.56	0
18	GFP lo_mouse3_GFP_Dll4_043.nd2	1519.66		518.053	518.053			1808.26		-120.81	0
19	GFP lo_mouse3_GFP_Dll4_044.nd2	1409.86		494.003	494.003			2130.87		206.277	206.277
20	GFP lo_mouse3_GFP_Dll4_044.nd2	1475.17		559.313	559.313			2033.23		108.637	108.637
21	GFP lo_mouse3_GFP_Dll4_044.nd2	1519.79		603.933	603.933			2014.01		89.4167	89.4167
22	GFP lo_mouse3_GFP_Dll4_044.nd2	1444.64		528.783	528.783			2018.53		93.9367	93.9367
23	GFP lo_mouse3_GFP_Dll4_044.nd2	1101.18		185.323	185.323			1717.15		-207.443	0
24	GFP lo_mouse3_GFP_Dll4_044.nd2	1177.85		261.993	261.993			1963.41		38.8167	38.8167
25	GFP lo_mouse3_GFP_Dll4_044.nd2	1474.54		558.683	558.683			1849.47		-75.1233	0
26	GFP lo_mouse3_GFP_Dll4_044.nd2	1465.28		549.423	549.423			1926.17		1.57667	1.57667
27	GFP lo_mouse3_GFP_Dll4_044.nd2	1162.21		246.353	246.353			2053.1		128.507	128.507
28	GFP lo_mouse3_GFP_Dll4_044.nd2	1554.41		638.553	638.553			2003.23		78.6367	78.6367
29	GFP lo_mouse3_GFP_Dll4_044.nd2	1152.62		236.763	236.763			1931.3		6.70667	6.70667
30	GFP lo_mouse3_GFP_Dll4_044.nd2	1200.06		284.203	284.203			1863.95		-60.6433	0
31	GFP lo_mouse3_GFP_Dll4_044.nd2	1256.73		340.873	340.873			1785.41		-139.183	0
32	GFP lo_mouse3_GFP_Dll4_044.nd2	1367.61		451.753	451.753			1845.67		-78.9233	0
33	GFP lo_mouse3_GFP_Dll4_044.nd2	1347.6		431.743	431.743			1861.86		-62.7333	0
34	GFP lo_mouse3_GFP_Dll4_044.nd2	1317.4		401.543	401.543			1836.29		-88.3033	0
35	GFP lo_mouse3_GFP_Dll4_044.nd2	1490.95		575.093	575.093			1886.24		-38.3533	0
36	GFP lo_mouse3_GFP_Dll4_044.nd2	1281.94		366.083	366.083			1917.81		-6.78333	0
37	GFP lo_mouse3_GFP_Dll4_044.nd2	1271.37		355.513	355.513			1967.91		43.3167	43.3167
38	GFP lo_mouse3_GFP_Dll4_045.nd2	1204.96	912.273	292.687	292.687			2038.83	1908.55	130.283	130.283
39	GFP lo_mouse3_GFP_Dll4_045.nd2	1588.99		676.717	676.717			2077.27		168.723	168.723
40	GFP lo_mouse3_GFP_Dll4_045.nd2	1326.21		413.937	413.937			2027.14		118.593	118.593
41	GFP lo_mouse3_GFP_Dll4_045.nd2	1409.56		497.287	497.287			1875.69		-32.8567	0
42	GFP lo_mouse3_GFP_Dll4_045.nd2	1506.41		594.137	594.137			1877.87		-30.6767	0
43	GFP lo_mouse3_GFP_Dll4_045.nd2	1146.76		234.487	234.487			1928		19.4533	19.4533
44	GFP lo_mouse3_GFP_Dll4_045.nd2	1259.12		346.847	346.847			1906.18		-2.36667	0
45	GFP lo_mouse3_GFP_Dll4_045.nd2	1155.45		243.177	243.177			1747.44		-161.107	0
46	GFP lo_mouse3_GFP_Dll4_045.nd2	1251.19		338.917	338.917			1858.57		-49.9767	0
47	GFP lo_mouse3_GFP_Dll4_045.nd2	1367.52		455.247	455.247			1904.58		-3.96667	0
48	GFP lo_mouse3_GFP_Dll4_045.nd2	1144.19		231.917	231.917			1906.45		-2.09667	0
49	GFP lo_mouse3_GFP_Dll4_045.nd2	1217.12		304.847	304.847			1681.49		-227.057	0
50	GFP lo_mouse3_GFP_Dll4_045.nd2	992.23		79.9567	79.9567			1629.75		-278.797	0
51	GFP lo_mouse3_GFP_Dll4_045.nd2	1340.93		428.657	428.657			1923.4		14.8533	14.8533
52	GFP lo_mouse3_GFP_Dll4_045.nd2	1413.07		500.797	500.797			1635.29		-273.257	0
53	GFP lo_mouse3_GFP_Dll4_045.nd2	1489.65		577.377	577.377			1816.17		-92.3767	0
54	GFP lo_mouse3_GFP_Dll4_045.nd2	1091.12		178.847	178.847			1629.8		-278.747	0
55	GFP lo_mouse3_GFP_Dll4_046.nd2	1560.14	955.767	604.373	604.373			2182.61	1939.38	243.23	243.23
56	GFP lo_mouse3_GFP_Dll4_046.nd2	1258.63		302.863	302.863			2135.68		196.3	196.3
57	GFP lo_mouse3_GFP_Dll4_046.nd2	1272.23		316.463	316.463			2002.51		63.13	63.13
58	GFP lo_mouse3_GFP_Dll4_046.nd2	1340.84		385.073	385.073			1555.01		-384.37	0
59	GFP lo_mouse3_GFP_Dll4_046.nd2	1495.44		539.673	539.673			1957.45		18.07	18.07
60	GFP lo_mouse3_GFP_Dll4_046.nd2	1207.77		252.003	252.003			1911.48		-27.9	0
61	GFP lo_mouse3_GFP_Dll4_046.nd2	1091.74		135.973	135.973			1643.49		-295.89	0
62	GFP lo_mouse3_GFP_Dll4_046.nd2	1390.7		434.933	434.933			1794.98		-144.4	0
63	GFP lo_mouse3_GFP_Dll4_046.nd2	1421.73		465.963	465.963			1741.6		-197.78	0
64	GFP lo_mouse3_GFP_Dll4_047.nd2	1468.36	954.97	513.39	513.39			2190.08	1891.76	298.32	298.32
65	GFP lo_mouse3_GFP_Dll4_047.nd2	1574.1		619.13	619.13			2088.22		196.46	196.46
66	GFP lo_mouse3_GFP_Dll4_047.nd2	1511.22		556.25	556.25			2032.33		140.57	140.57
67	GFP lo_mouse3_GFP_Dll4_047.nd2	1252.35		297.38	297.38			1848.2		-43.56	0
68	GFP lo_mouse3_GFP_Dll4_047.nd2	1183.14		228.17	228.17			1965.39		73.63	73.63
69	GFP lo_mouse3_GFP_Dll4_047.nd2	887.76		-67.21	0			1565.33		-326.43	0
70	GFP lo_mouse3_GFP_Dll4_048.nd2	1390.97	934.367	456.603	456.603			2172.9	1918.95	253.953	253.953
71	GFP lo_mouse3_GFP_Dll4_048.nd2	1362.04		427.673	427.673			2001.52		82.5733	82.5733
72	GFP lo_mouse3_GFP_Dll4_048.nd2	1381.38		447.013	447.013			1889.33		-29.6167	0
73	GFP lo_mouse3_GFP_Dll4_048.nd2	1320.59		386.223	386.223			1554.59		-364.357	0
74	GFP lo_mouse3_GFP_Dll4_048.nd2	1289.53		355.163	355.163			1745.58		-173.367	0
75	GFP lo_mouse3_GFP_Dll4_049.nd2	1194.45	944.657	249.793	249.793			2124.55	1906.35	218.197	218.197
76	GFP lo_mouse3_GFP_Dll4_049.nd2	1533.5		588.843	588.843			2091.04		184.687	184.687
77	GFP lo_mouse3_GFP_Dll4_049.nd2	1116.33		171.673	171.673			1996.66		90.3067	90.3067
78	GFP lo_mouse3_GFP_Dll4_049.nd2	1206.53		261.873	261.873			1986.95		80.5967	80.5967
79	GFP lo_mouse3_GFP_Dll4_049.nd2	1227.9		283.243	283.243			1953.26		46.9067	46.9067
80	GFP lo_mouse3_GFP_Dll4_049.nd2	1359.25		414.593	414.593			1942.33		35.9767	35.9767
81	GFP lo_mouse3_GFP_Dll4_049.nd2	1288.57		343.913	343.913			1977.62		71.2667	71.2667
82	GFP lo_mouse3_GFP_Dll4_049.nd2	1291.05		346.393	346.393			1914.85		8.49667	8.49667
83	GFP lo_mouse3_GFP_Dll4_049.nd2	1404.72		460.063	460.063			1824.94		-81.4133	0
84	GFP lo_mouse3_GFP_Dll4_049.nd2	1167.51		222.853	222.853			1785.36		-120.993	0
85	GFP lo_mouse3_GFP_Dll4_049.nd2	1196.59		251.933	251.933			1803.94		-102.413	0
86	GFP lo_mouse3_GFP_Dll4_049.nd2	1232.19		287.533	287.533			1787.92		-118.433	0
87	GFP lo_mouse3_GFP_Dll4_049.nd2	1237.94		293.283	293.283			1825.92		-80.4333	0
88	GFP lo_mouse3_GFP_Dll4_049.nd2	1004		59.3433	59.3433			1685.58		-220.773	0
89	GFP lo_mouse3_GFP_Dll4_049.nd2	1312.8		368.143	368.143			1978.35		71.9967	71.9967
90	GFP lo_mouse3_GFP_Dll4_049.nd2	1374.82		430.163	430.163			1884.51		-21.8433	0
91	GFP lo_mouse3_GFP_Dll4_049.nd2	1113.15		168.493	168.493			1331.48		-574.873	0
92	GFP lo_mouse3_GFP_Dll4_049.nd2	1320.34		375.683	375.683			1988.5		82.1467	82.1467
93	GFP lo_mouse3_GFP_Dll4_049.nd2	1505.21		560.553	560.553			1872.55		-33.8033	0
94	GFP lo_mouse3_GFP_Dll4_050.nd2	1356.97	939.303	417.667	417.667			2094.99	1926.83	168.16	168.16
95	GFP lo_mouse3_GFP_Dll4_050.nd2	1291.74		352.437	352.437			2045.87		119.04	119.04
96	GFP lo_mouse3_GFP_Dll4_050.nd2	1389.69		450.387	450.387			2060.48		133.65	133.65
97	GFP lo_mouse3_GFP_Dll4_050.nd2	1358.96		419.657	419.657			2039.02		112.19	112.19
98	GFP lo_mouse3_GFP_Dll4_050.nd2	1368.33		429.027	429.027			1987.38		60.55	60.55
99	GFP lo_mouse3_GFP_Dll4_050.nd2	1541.87		602.567	602.567			1920.42		-6.41	0
100	GFP lo_mouse3_GFP_Dll4_050.nd2	1323.05		383.747	383.747			1917.07		-9.76	0
101	GFP lo_mouse3_GFP_Dll4_050.nd2	1226.69		287.387	287.387			2024.7		97.87	97.87
102	GFP lo_mouse3_GFP_Dll4_050.nd2	1508.67		569.367	569.367			1992.3		65.47	65.47
103	GFP lo_mouse3_GFP_Dll4_050.nd2	1186.21		246.907	246.907			1703.34		-223.49	0
104	GFP lo_mouse3_GFP_Dll4_050.nd2	1249.54		310.237	310.237			1774.56		-152.27	0
105	GFP lo_mouse3_GFP_Dll4_050.nd2	1183.84		244.537	244.537			1588.3		-338.53	0
106	GFP lo_mouse3_GFP_Dll4_050.nd2	1279.61		340.307	340.307			1884.79		-42.04	0
107	GFP lo_mouse3_GFP_Dll4_050.nd2	1419.28		479.977	479.977			1722.94		-203.89	0
108	GFP lo_mouse3_GFP_Dll4_050.nd2	1134.36		195.057	195.057			1905.52		-21.31	0
109	GFP lo_mouse3_GFP_Dll4_050.nd2	1220.95		281.647	281.647			1822.73		-104.1	0
110	GFP lo_mouse3_GFP_Dll4_050.nd2	1260.98		321.677	321.677			1923.08		-3.75	0
111	GFP lo_mouse3_GFP_Dll4_050.nd2	1128.51		189.207	189.207			1687.67		-239.16	0
112	GFP lo_mouse3_GFP_Dll4_050.nd2	1250.9		311.597	311.597			1815.07		-111.76	0
113	GFP lo_mouse3_GFP_Dll4_050.nd2	1099.95		160.647	160.647			1703.76		-223.07	0
114	GFP lo_mouse3_GFP_Dll4_051.nd2	1534.15	963.81	570.34	570.34			2213.16	1925.47	287.687	287.687
115	GFP lo_mouse3_GFP_Dll4_051.nd2	1368.54		404.73	404.73			2140.21		214.737	214.737
116	GFP lo_mouse3_GFP_Dll4_051.nd2	1541.38		577.57	577.57			2162.52		237.047	237.047
117	GFP lo_mouse3_GFP_Dll4_051.nd2	1495.28		531.47	531.47			1992.44		66.9667	66.9667
118	GFP lo_mouse3_GFP_Dll4_051.nd2	1398.23		434.42	434.42			2081.63		156.157	156.157
119	GFP lo_mouse3_GFP_Dll4_051.nd2	1169.24		205.43	205.43			2109.62		184.147	184.147
120	GFP lo_mouse3_GFP_Dll4_051.nd2	1316.42		352.61	352.61			2076.57		151.097	151.097
121	GFP lo_mouse3_GFP_Dll4_051.nd2	1180.53		216.72	216.72			2043.72		118.247	118.247
122	GFP lo_mouse3_GFP_Dll4_051.nd2	1128.6		164.79	164.79			2066.15		140.677	140.677
123	GFP lo_mouse3_GFP_Dll4_051.nd2	1396.24		432.43	432.43			1992.69		67.2167	67.2167
124	GFP lo_mouse3_GFP_Dll4_051.nd2	1581.9		618.09	618.09			1649.19		-276.283	0
125	GFP lo_mouse3_GFP_Dll4_051.nd2	1408.79		444.98	444.98			2176.18		250.707	250.707
126	GFP lo_mouse3_GFP_Dll4_051.nd2	1611.05		647.24	647.24			2089.58		164.107	164.107
127	GFP lo_mouse3_GFP_Dll4_051.nd2	1497.29		533.48	533.48			1739.14		-186.333	0
128	GFP lo_mouse3_GFP_Dll4_051.nd2	1278.41		314.6	314.6			1733.87		-191.603	0
129	GFP lo_mouse3_GFP_Dll4_051.nd2	1465.09		501.28	501.28			1928.28		2.80667	2.80667
130	GFP lo_mouse3_GFP_Dll4_052.nd2	1469.64		553.193	553.193			1935.5		60.19	60.19
131	GFP lo_mouse3_GFP_Dll4_052.nd2	1056.97		140.523	140.523			1852.9		-22.41	0
132	GFP lo_mouse3_GFP_Dll4_052.nd2	1444.72		528.273	528.273			2099.14		223.83	223.83
133	GFP lo_mouse3_GFP_Dll4_052.nd2	1378.23		461.783	461.783			2070.79		195.48	195.48
134	GFP lo_mouse3_GFP_Dll4_053.nd2	1590.63		592.223	592.223			2071.35		153.213	153.213
135	GFP lo_mouse3_GFP_Dll4_053.nd2	1470.98		472.573	472.573			2203.38		285.243	285.243
136	GFP lo_mouse3_GFP_Dll4_053.nd2	1481.99		483.583	483.583			2206.93		288.793	288.793
137	GFP lo_mouse3_GFP_Dll4_053.nd2	1268.06		269.653	269.653			2141.39		223.253	223.253
138	GFP lo_mouse3_GFP_Dll4_054.nd2	1630	995.31	634.69	634.69			1976.11	1935.96	40.1533	40.1533
139	GFP lo_mouse3_GFP_Dll4_054.nd2	1580.78		585.47	585.47			1976.05		40.0933	40.0933
140	GFP lo_mouse3_GFP_Dll4_054.nd2	1522.46		527.15	527.15			1994		58.0433	58.0433
141	GFP lo_mouse3_GFP_Dll4_054.nd2	1330.17		334.86	334.86			1933.83		-2.12667	0
142	GFP lo_mouse3_GFP_Dll4_054.nd2	1526.24		530.93	530.93			1972.37		36.4133	36.4133
143	GFP lo_mouse3_GFP_Dll4_054.nd2	1267.01		271.7	271.7			1943.52		7.56333	7.56333
144	GFP lo_mouse3_GFP_Dll4_054.nd2	1448.81		453.5	453.5			1919.56		-16.3967	0
145	GFP lo_mouse3_GFP_Dll4_054.nd2	1459.97		464.66	464.66			1896.63		-39.3267	0
146	GFP lo_mouse3_GFP_Dll4_054.nd2	1288.81		293.5	293.5			1664.07		-271.887	0
147	GFP lo_mouse3_GFP_Dll4_054.nd2	1622.43		627.12	627.12			1873.82		-62.1367	0
148	GFP lo_mouse3_GFP_Dll4_054.nd2	1531.57		536.26	536.26			1936.32		0.363333	0.363333
149	GFP lo_mouse3_GFP_Dll4_054.nd2	1470.79		475.48	475.48			1977.2		41.2433	41.2433
150	GFP lo_mouse3_GFP_Dll4_054.nd2	1288.71		293.4	293.4			1458.82		-477.137	0
151	GFP lo_mouse3_GFP_Dll4_055.nd2	1290.86	932.313	358.547	358.547			2055.67	1920.48	135.193	135.193
152	GFP lo_mouse3_GFP_Dll4_055.nd2	1136.76		204.447	204.447			1834.01		-86.4667	0
153	GFP lo_mouse3_GFP_Dll4_055.nd2	1213.26		280.947	280.947			1964.06		43.5833	43.5833
154	GFP lo_mouse3_GFP_Dll4_055.nd2	1609.65		677.337	677.337			2006.56		86.0833	86.0833
155	GFP lo_mouse3_GFP_Dll4_055.nd2	1456.88		524.567	524.567			1561.02		-359.457	0
156	GFP lo_mouse3_GFP_Dll4_056.nd2	1536.76		588.317	588.317			1670.71		-269.49	0
157	GFP lo_mouse3_GFP_Dll4_056.nd2	1280.26		331.817	331.817			1670.76		-269.44	0
158	GFP lo_mouse3_GFP_Dll4_056.nd2	1374.92		426.477	426.477			1814.11		-126.09	0
159	GFP lo_mouse3_GFP_Dll4_057.nd2	1387.59		433.32	433.32			2137.41		226.09	226.09
160	GFP lo_mouse3_GFP_Dll4_057.nd2	1399.47		445.2	445.2			2019.05		107.73	107.73
161	GFP lo_mouse3_GFP_Dll4_057.nd2	1209.01		254.74	254.74			1863.72		-47.6	0
162	GFP lo_mouse3_GFP_Dll4_058.nd2	1559.02		620.397	620.397			2071.84		135.21	135.21
163	GFP lo_mouse3_GFP_Dll4_058.nd2	1244.55		305.927	305.927			2187.03		250.4	250.4
164	GFP lo_mouse3_GFP_Dll4_058.nd2	1185.17		246.547	246.547			2184.9		248.27	248.27
165	GFP lo_mouse3_GFP_Dll4_058.nd2	1634.7		696.077	696.077			2209.97		273.34	273.34
166	GFP lo_mouse3_GFP_Dll4_059.nd2	1552.93		644.303	644.303			1927.31		35.27	35.27
167	GFP lo_mouse3_GFP_Dll4_059.nd2	1462.58		553.953	553.953			1936.5		44.46	44.46
168	GFP lo_mouse3_GFP_Dll4_059.nd2	1513.93		605.303	605.303			1854.09		-37.95	0
169	GFP lo_mouse3_GFP_Dll4_059.nd2	1386.56		477.933	477.933			1934.61		42.57	42.57
170	GFP lo_mouse3_GFP_Dll4_059.nd2	1446.02		537.393	537.393			1530.43		-361.61	0
171	GFP lo_mouse3_GFP_Dll4_059.nd2	1091.05		182.423	182.423			1428.86		-463.18	0
172	GFP lo_mouse3_GFP_Dll4_059.nd2	1607.48		698.853	698.853			1768.01		-124.03	0
173	GFP lo_mouse3_GFP_Dll4_059.nd2	1294.18		385.553	385.553			1587.89		-304.15	0
174	GFP lo_mouse3_GFP_Dll4_059.nd2	1605.85		697.223	697.223			1530.57		-361.47	0
175	GFP lo_mouse3_GFP_Dll4_059.nd2	1197.26		288.633	288.633			1678.58		-213.46	0
176	GFP lo_mouse3_GFP_Dll4_059.nd2	1549.39		640.763	640.763			1816.16		-75.88	0
177	GFP lo_mouse3_GFP_Dll4_059.nd2	1457.82		549.193	549.193			1819.5		-72.54	0
178	GFP lo_mouse3_GFP_Dll4_059.nd2	1399.43		490.803	490.803			1868.34		-23.7	0
179	GFP lo_mouse3_GFP_Dll4_059.nd2	1598.59		689.963	689.963			1924.85		32.81	32.81
180	GFP lo_mouse3_GFP_Dll4_059.nd2	1437.28		528.653	528.653			1794.15		-97.89	0
181	GFP lo_mouse3_GFP_Dll4_059.nd2	1404.61		495.983	495.983			1720.27		-171.77	0
182	GFP lo_mouse3_GFP_Dll4_059.nd2	1480.5		571.873	571.873			1706.19		-185.85	0
183	GFP lo_mouse3_GFP_Dll4_060.nd2	1495.92	903.873	592.047	592.047			1806.19	1957.38	-151.193	0
184	GFP lo_mouse3_GFP_Dll4_060.nd2	1369.54		465.667	465.667			1789.98		-167.403	0
185	GFP lo_mouse3_GFP_Dll4_060.nd2	1447.08		543.207	543.207			1671.59		-285.793	0
186	GFP lo_mouse3_GFP_Dll4_060.nd2	1458.66		554.787	554.787			1711		-246.383	0
187	GFP lo_mouse3_GFP_Dll4_060.nd2	1344.07		440.197	440.197			1693.97		-263.413	0
188	GFP lo_mouse3_GFP_Dll4_060.nd2	1308.02		404.147	404.147			1614.41		-342.973	0
189	GFP lo_mouse3_GFP_Dll4_060.nd2	1055.99		152.117	152.117			1614.49		-342.893	0
190	GFP lo_mouse3_GFP_Dll4_060.nd2	1212.06		308.187	308.187			1610.85		-346.533	0
191	GFP lo_mouse3_GFP_Dll4_060.nd2	1412.33		508.457	508.457			1618.72		-338.663	0
192	GFP lo_mouse3_GFP_Dll4_060.nd2	1358.36		454.487	454.487			1622.71		-334.673	0
193	GFP lo_mouse3_GFP_Dll4_060.nd2	1275.07		371.197	371.197			1730.72		-226.663	0
194	GFP lo_mouse3_GFP_Dll4_060.nd2	1174.63		270.757	270.757			1503.61		-453.773	0
195	GFP lo_mouse3_GFP_Dll4_060.nd2	1080.33		176.457	176.457			1428.16		-529.223	0
196	GFP lo_mouse3_GFP_Dll4_060.nd2	1165.14		261.267	261.267			1486.81		-470.573	0
197	GFP lo_mouse3_GFP_Dll4_060.nd2	1381.27		477.397	477.397			1407.85		-549.533	0
198	GFP lo_mouse3_GFP_Dll4_060.nd2	1256.83		352.957	352.957			1618.43		-338.953	0
199	GFP lo_mouse3_GFP_Dll4_060.nd2	1176.98		273.107	273.107			1720.47		-236.913	0
200	GFP lo_mouse3_GFP_Dll4_060.nd2	1289.05		385.177	385.177			1607.09		-350.293	0
201	GFP lo_mouse3_GFP_Dll4_061.nd2	1488.64	920.057	568.583	568.583			2114.76	1927.63	187.133	187.133
202	GFP lo_mouse3_GFP_Dll4_061.nd2	1338.61		418.553	418.553			2056.31		128.683	128.683
203	GFP lo_mouse3_GFP_Dll4_061.nd2	1545.38		625.323	625.323			2015.5		87.8733	87.8733
204	GFP lo_mouse3_GFP_Dll4_061.nd2	1435.24		515.183	515.183			1892.65		-34.9767	0
205	GFP lo_mouse3_GFP_Dll4_061.nd2	1356.24		436.183	436.183			1852.07		-75.5567	0
206	GFP lo_mouse3_GFP_Dll4_061.nd2	1268.4		348.343	348.343			1933.57		5.94333	5.94333
207	GFP lo_mouse3_GFP_Dll4_061.nd2	1338.39		418.333	418.333			1925.67		-1.95667	0
208	GFP lo_mouse3_GFP_Dll4_061.nd2	1378.32		458.263	458.263			1944.41		16.7833	16.7833
209	GFP lo_mouse3_GFP_Dll4_061.nd2	1484.5		564.443	564.443			1610.53		-317.097	0
210	GFP lo_mouse3_GFP_Dll4_061.nd2	1243.4		323.343	323.343			1320.95		-606.677	0
211	GFP lo_mouse3_GFP_Dll4_061.nd2	1296.46		376.403	376.403			1612.24		-315.387	0
212	GFP lo_mouse3_GFP_Dll4_061.nd2	1302.74		382.683	382.683			1930.59		2.96333	2.96333
213	GFP lo_mouse3_GFP_Dll4_061.nd2	1173.79		253.733	253.733			1665.05		-262.577	0
214	GFP lo_mouse3_GFP_Dll4_061.nd2	1325.67		405.613	405.613			1638.77		-288.857	0
