# Supplementary material for: Heterogeneous levels of delta-like 4 within a multinucleated niche cell maintains muscle stem cell diversity
Source: eLife. 2022 Dec 30;11:e68180. doi: 10.7554/eLife.68180 (PMC9803355; doi:10.7554/eLife.68180)
Supplement: Figure 1—source data 6. [file elife-68180-fig1-data6.xlsx]

## Sheet: mouse 1_GFP low
Mouse1	GFP low population	60h after plating cells
Item	Source	# of DAPI +'ve SCs	# of EdU +'ve SCs	% EdU +'ve SCs
1	mouse1_low GFP_EdU_60h_001	6	4
2	mouse1_low GFP_EdU_60h_002	13	4
3	mouse1_low GFP_EdU_60h_003	25	12
4	mouse1_low GFP_EdU_60h_004	13	6
5	mouse1_low GFP_EdU_60h_005	35	19
6	mouse1_low GFP_EdU_60h_006	52	25
7	mouse1_low GFP_EdU_60h_007	47	22
8	mouse1_low GFP_EdU_60h_008	24	13
9	mouse1_low GFP_EdU_60h_009	7	2
10	mouse1_low GFP_EdU_60h_010	36	16
	Total	258	123	47.6744

## Sheet: mouse 1_GFP med
Mouse1	GFP medium population	60h after plating cells
Item	Source	# of DAPI +'ve SCs	# of EdU +'ve SCs	% EdU +'ve SCs
1	mouse1_med GFP_EdU_60h_001	9	1
2	mouse1_med GFP_EdU_60h_002	37	16
3	mouse1_med GFP_EdU_60h_003	68	23
4	mouse1_med GFP_EdU_60h_004	53	14
5	mouse1_med GFP_EdU_60h_005	17	3
6	mouse1_med GFP_EdU_60h_006	15	1
7	mouse1_med GFP_EdU_60h_007	45	12
8	mouse1_med GFP_EdU_60h_008	49	18
9	mouse1_med GFP_EdU_60h_009	33	17
10	mouse1_med GFP_EdU_60h_010	7	4
11	mouse1_med GFP_EdU_60h_011	12	1
12	mouse1_med GFP_EdU_60h_012	26	2
13	mouse1_med GFP_EdU_60h_013	30	17
14	mouse1_med GFP_EdU_60h_014	12	0
	Total	413	129	31.2349

## Sheet: mouse 1_GFP hi
Mouse1	GFP high population	60h after plating cells
Item	Source	# of DAPI +'ve SCs	# of EdU +'ve SCs	% EdU +'ve SCs
1	mouse1_high GFP_EdU_60h_001	12	0
2	mouse1_high GFP_EdU_60h_002	12	5
3	mouse1_high GFP_EdU_60h_003	17	1
4	mouse1_high GFP_EdU_60h_004	5	2
5	mouse1_high GFP_EdU_60h_005	15	3
6	mouse1_high GFP_EdU_60h_006	9	7
7	mouse1_high GFP_EdU_60h_007	14	3
8	mouse1_high GFP_EdU_60h_008	11	0
9	mouse1_high GFP_EdU_60h_009	5	0
10	mouse1_high GFP_EdU_60h_010	7	0
11	mouse1_high GFP_EdU_60h_011	18	0
12	mouse1_high GFP_EdU_60h_012	7	0
13	mouse1_high GFP_EdU_60h_013	7	0
	Total	139	21	15.1079

## Sheet: mouse 2_GFP low
Mouse2	GFP low population	60h after plating cells
Item	Source	# of DAPI +'ve SCs	# of EdU +'ve SCs	% EdU +'ve SCs
1	mouse2_low GFP_EdU_60h_001	6	5
2	mouse2_low GFP_EdU_60h_002	5	3
3	mouse2_low GFP_EdU_60h_003	7	5
4	mouse2_low GFP_EdU_60h_004	6	3
5	mouse2_low GFP_EdU_60h_005	9	2
6	mouse2_low GFP_EdU_60h_006	17	10
7	mouse2_low GFP_EdU_60h_007	1	0
8	mouse2_low GFP_EdU_60h_008	12	6
9	mouse2_low GFP_EdU_60h_009	31	23
10	mouse2_low GFP_EdU_60h_010	48	27
11	mouse2_low GFP_EdU_60h_011	37	20
	Total	179	104	58.1006

## Sheet: mouse 2_GFP med
Mouse2	GFP med population	60h after plating cells
Item	Source	# of DAPI +'ve SCs	# of EdU +'ve SCs	% EdU +'ve SCs
1	mouse2_med GFP_EdU_60h_001	7	3
2	mouse2_med GFP_EdU_60h_002	11	5
3	mouse2_med GFP_EdU_60h_003	21	8
4	mouse2_med GFP_EdU_60h_004	12	3
5	mouse2_med GFP_EdU_60h_005	7	2
6	mouse2_med GFP_EdU_60h_006	7	3
7	mouse2_med GFP_EdU_60h_007	12	4
8	mouse2_med GFP_EdU_60h_008	24	6
9	mouse2_med GFP_EdU_60h_009	37	9
10	mouse2_med GFP_EdU_60h_010	15	4
11	mouse2_med GFP_EdU_60h_011	17	3
12	mouse2_med GFP_EdU_60h_012	4	1
13	mouse2_med GFP_EdU_60h_013	27	8
14	mouse2_med GFP_EdU_60h_014	65	25
15	mouse2_med GFP_EdU_60h_015	25	4
16	mouse2_med GFP_EdU_60h_016	8	2
17	mouse2_med GFP_EdU_60h_017	9	3
18	mouse2_med GFP_EdU_60h_018	21	8
19	mouse2_med GFP_EdU_60h_019	24	5
20	mouse2_med GFP_EdU_60h_020	10	3
21	mouse2_med GFP_EdU_60h_021	12	3
22	mouse2_med GFP_EdU_60h_022	25	4
23	mouse2_med GFP_EdU_60h_023	22	4
	Total	422	120	28.436

## Sheet: mouse 2_GFP hi
Mouse2	GFP high population	60h after plating cells
Item	Source	# of DAPI +'ve SCs	# of EdU +'ve SCs	% EdU +'ve SCs
1	mouse2_high GFP_EdU_60h_001	25	4
2	mouse2_high GFP_EdU_60h_002	41	9
3	mouse2_high GFP_EdU_60h_003	40	12
4	mouse2_high GFP_EdU_60h_004	15	3
5	mouse2_high GFP_EdU_60h_005	38	8
21	mouse2_high GFP_EdU_60h_021	12	2
12	mouse2_high GFP_EdU_60h_012	94	8
8	mouse2_high GFP_EdU_60h_008	48	10
9	mouse2_high GFP_EdU_60h_009	9	2
10	mouse2_high GFP_EdU_60h_010	20	5
22	mouse2_high GFP_EdU_60h_022	5	0
11	mouse2_high GFP_EdU_60h_011	41	6
	Total	388	69	17.7835

## Sheet: mouse 3_GFP low
Mouse3	GFP low population	60h after plating cells
Item	Source	# of DAPI +'ve SCs	# of EdU +'ve SCs	% EdU +'ve SCs
1	mouse3_low GFP_EdU_60h_001	40	21
2	mouse3_low GFP_EdU_60h_002	28	12
3	mouse3_low GFP_EdU_60h_003	18	12
4	mouse3_low GFP_EdU_60h_004	18	9
5	mouse3_low GFP_EdU_60h_005	44	28
6	mouse3_low GFP_EdU_60h_006	36	13
7	mouse3_low GFP_EdU_60h_007	20	10
8	mouse3_low GFP_EdU_60h_008	8	4
9	mouse3_low GFP_EdU_60h_009	6	2
10	mouse3_low GFP_EdU_60h_010	5	1
	Total	223	112	50.2242

## Sheet: mouse 3_GFP med
Mouse3	GFP medium population	60h after plating cells
Item	Source	# of DAPI +'ve SCs	# of EdU +'ve SCs	% EdU +'ve SCs
1	mouse3_med GFP_EdU_60h_001	67	26
2	mouse3_med GFP_EdU_60h_002	27	13
3	mouse3_med GFP_EdU_60h_003	19	10
4	mouse3_med GFP_EdU_60h_004	4	1
5	mouse3_med GFP_EdU_60h_005	18	11
6	mouse3_med GFP_EdU_60h_006	16	6
7	mouse3_med GFP_EdU_60h_007	29	8
8	mouse3_med GFP_EdU_60h_008	24	4
9	mouse3_med GFP_EdU_60h_009	22	6
10	mouse3_med GFP_EdU_60h_010	27	7
11	mouse3_med GFP_EdU_60h_011	13	3
12	mouse3_med GFP_EdU_60h_012	18	3
13	mouse3_med GFP_EdU_60h_013	9	3
	Total	293	101	34.471

## Sheet: mouse 3_GFP hi
Mouse3	GFP high population	60h after plating cells
Item	Source	# of DAPI +'ve SCs	# of EdU +'ve SCs	% EdU +'ve SCs
1	mouse3_high GFP_EdU_60h_001	14	5
2	mouse3_high GFP_EdU_60h_002	10	1
3	mouse3_high GFP_EdU_60h_003	12	1
4	mouse3_high GFP_EdU_60h_004	9	0
5	mouse3_high GFP_EdU_60h_005	6	0
6	mouse3_high GFP_EdU_60h_006	24	8
7	mouse3_high GFP_EdU_60h_007	18	4
8	mouse3_high GFP_EdU_60h_008	5	0
9	mouse3_high GFP_EdU_60h_009	5	0
10	mouse3_high GFP_EdU_60h_010	5	0
11	mouse3_high GFP_EdU_60h_011	3	0
12	mouse3_high GFP_EdU_60h_012	4	0
	Total	115	19	16.5217
