# Supplementary material for: Heterogeneous levels of delta-like 4 within a multinucleated niche cell maintains muscle stem cell diversity
Source: eLife. 2022 Dec 30;11:e68180. doi: 10.7554/eLife.68180 (PMC9803355; doi:10.7554/eLife.68180)
Supplement: Figure 1—source data 7. [file elife-68180-fig1-data7.xlsx]

## Sheet: Hi GFP_mouse1
Item	Source	MyoG (TxRed) mean intensity	TxRed background	MyoG mean intensity	Corrected minus to zeros
1	GFP hi_mouse1_MyoG_001.nd2	2207.01	2010.73	196.283	196.283
2	GFP hi_mouse1_MyoG_001.nd2	2225.3		214.573	214.573
3	GFP hi_mouse1_MyoG_001.nd2	2154.43		143.703	143.703
4	GFP hi_mouse1_MyoG_002.nd2	2448.73	2009.44	439.29	439.29
5	GFP hi_mouse1_MyoG_002.nd2	2326.84		317.4	317.4
6	GFP hi_mouse1_MyoG_002.nd2	1991.37		-18.07	0
7	GFP hi_mouse1_MyoG_002.nd2	2303.46		294.02	294.02
8	GFP hi_mouse1_MyoG_002.nd2	1852.19		-157.25	0
9	GFP hi_mouse1_MyoG_002.nd2	2351.46		342.02	342.02
10	GFP hi_mouse1_MyoG_002.nd2	2119.71		110.27	110.27
11	GFP hi_mouse1_MyoG_003.nd2	2413.56	2079.02	334.54	334.54
12	GFP hi_mouse1_MyoG_003.nd2	2189.2		110.18	110.18
13	GFP hi_mouse1_MyoG_003.nd2	2189.77		110.75	110.75
14	GFP hi_mouse1_MyoG_003.nd2	2280.08		201.06	201.06
15	GFP hi_mouse1_MyoG_003.nd2	2220.51		141.49	141.49
16	GFP hi_mouse1_MyoG_003.nd2	2055.8		-23.22	0
17	GFP hi_mouse1_MyoG_003.nd2	2164.86		85.84	85.84
18	GFP hi_mouse1_MyoG_004.nd2	2621.7	2208.13	413.573	413.573
19	GFP hi_mouse1_MyoG_004.nd2	2512.64		304.513	304.513
20	GFP hi_mouse1_MyoG_004.nd2	2199.73		-8.39667	0
21	GFP hi_mouse1_MyoG_004.nd2	2235.42		27.2933	27.2933
22	GFP hi_mouse1_MyoG_004.nd2	2320.07		111.943	111.943
23	GFP hi_mouse1_MyoG_004.nd2	2186.26		-21.8667	0
24	GFP hi_mouse1_MyoG_004.nd2	2021.85		-186.277	0
25	GFP hi_mouse1_MyoG_004.nd2	1798.09		-410.037	0
26	GFP hi_mouse1_MyoG_004.nd2	2324.84		116.713	116.713
27	GFP hi_mouse1_MyoG_004.nd2	2274.11		65.9833	65.9833
28	GFP hi_mouse1_MyoG_004.nd2	2248.42		40.2933	40.2933
29	GFP hi_mouse1_MyoG_004.nd2	2322.11		113.983	113.983
30	GFP hi_mouse1_MyoG_004.nd2	2462.64		254.513	254.513
31	GFP hi_mouse1_MyoG_005.nd2	2756.67	2370	386.667	386.667
32	GFP hi_mouse1_MyoG_005.nd2	2628.28		258.277	258.277
33	GFP hi_mouse1_MyoG_005.nd2	2474.6		104.597	104.597
34	GFP hi_mouse1_MyoG_005.nd2	2384.53		14.527	14.527
35	GFP hi_mouse1_MyoG_005.nd2	1973.75		-396.253	0
36	GFP hi_mouse1_MyoG_005.nd2	2215.07		-154.933	0
37	GFP hi_mouse1_MyoG_005.nd2	2218.75		-151.253	0
38	GFP hi_mouse1_MyoG_005.nd2	2259.67		-110.333	0
39	GFP hi_mouse1_MyoG_005.nd2	1971.61		-398.393	0
40	GFP hi_mouse1_MyoG_005.nd2	2301.79		-68.213	0
41	GFP hi_mouse1_MyoG_006.nd2	2425.02		3.19667	3.19667
42	GFP hi_mouse1_MyoG_006.nd2	2284.85		-136.973	0
43	GFP hi_mouse1_MyoG_006.nd2	2431.26		9.43667	9.43667
44	GFP hi_mouse1_MyoG_007.nd2	2789.71	2429.9	359.807	359.807
45	GFP hi_mouse1_MyoG_007.nd2	2458.05		28.1467	28.1467
46	GFP hi_mouse1_MyoG_007.nd2	2450.19		20.2867	20.2867
47	GFP hi_mouse1_MyoG_007.nd2	2750.91		321.007	321.007
48	GFP hi_mouse1_MyoG_007.nd2	2613.47		183.567	183.567
49	GFP hi_mouse1_MyoG_008.nd2	2640.39	2358.56	281.83	281.83
50	GFP hi_mouse1_MyoG_008.nd2	2540.12		181.56	181.56
51	GFP hi_mouse1_MyoG_008.nd2	2631.77		273.21	273.21
52	GFP hi_mouse1_MyoG_008.nd2	2423.71		65.15	65.15
53	GFP hi_mouse1_MyoG_008.nd2	2404.27		45.71	45.71
54	GFP hi_mouse1_MyoG_008.nd2	2580.97		222.41	222.41
55	GFP hi_mouse1_MyoG_008.nd2	2562.8		204.24	204.24
56	GFP hi_mouse1_MyoG_008.nd2	2492.92		134.36	134.36
57	GFP hi_mouse1_MyoG_008.nd2	2154.96		-203.6	0
58	GFP hi_mouse1_MyoG_008.nd2	2491.92		133.36	133.36
59	GFP hi_mouse1_MyoG_008.nd2	2350.32		-8.24	0
60	GFP hi_mouse1_MyoG_008.nd2	2370.33		11.77	11.77
61	GFP hi_mouse1_MyoG_008.nd2	2745.48		386.92	386.92
62	GFP hi_mouse1_MyoG_008.nd2	2458.04		99.48	99.48
63	GFP hi_mouse1_MyoG_008.nd2	2451.93		93.37	93.37
64	GFP hi_mouse1_MyoG_009.nd2	2597.84		308.43	308.43
65	GFP hi_mouse1_MyoG_009.nd2	2560.97		271.56	271.56
66	GFP hi_mouse1_MyoG_009.nd2	2558.09		268.68	268.68
67	GFP hi_mouse1_MyoG_009.nd2	2565.01		275.6	275.6
68	GFP hi_mouse1_MyoG_009.nd2	2648.74		359.33	359.33
69	GFP hi_mouse1_MyoG_009.nd2	2447.79		158.38	158.38
70	GFP hi_mouse1_MyoG_009.nd2	2513.71		224.3	224.3
71	GFP hi_mouse1_MyoG_009.nd2	2404.88		115.47	115.47
72	GFP hi_mouse1_MyoG_009.nd2	2401.53		112.12	112.12
73	GFP hi_mouse1_MyoG_009.nd2	2543.23		253.82	253.82
74	GFP hi_mouse1_MyoG_009.nd2	2588.68		299.27	299.27
75	GFP hi_mouse1_MyoG_009.nd2	2258.34		-31.07	0
76	GFP hi_mouse1_MyoG_009.nd2	2376.12		86.71	86.71
77	GFP hi_mouse1_MyoG_009.nd2	2394.62		105.21	105.21
78	GFP hi_mouse1_MyoG_009.nd2	2354.23		64.82	64.82
79	GFP hi_mouse1_MyoG_009.nd2	2377.75		88.34	88.34
80	GFP hi_mouse1_MyoG_010.nd2	2770.23		449.547	449.547
81	GFP hi_mouse1_MyoG_010.nd2	2724.95		404.267	404.267
82	GFP hi_mouse1_MyoG_010.nd2	2454.39		133.707	133.707
83	GFP hi_mouse1_MyoG_010.nd2	2535.46		214.777	214.777
84	GFP hi_mouse1_MyoG_010.nd2	2333.86		13.1767	13.1767
85	GFP hi_mouse1_MyoG_010.nd2	2601.49		280.807	280.807
86	GFP hi_mouse1_MyoG_010.nd2	2613.91		293.227	293.227
87	GFP hi_mouse1_MyoG_010.nd2	2562.21		241.527	241.527
88	GFP hi_mouse1_MyoG_010.nd2	2319.16		-1.52333	0
89	GFP hi_mouse1_MyoG_010.nd2	2053.23		-267.453	0
90	GFP hi_mouse1_MyoG_011.nd2	2533.48		373.9	373.9
91	GFP hi_mouse1_MyoG_011.nd2	2568.22		408.64	408.64
92	GFP hi_mouse1_MyoG_011.nd2	2514.16		354.58	354.58
93	GFP hi_mouse1_MyoG_011.nd2	1973.31		-186.27	0
94	GFP hi_mouse1_MyoG_011.nd2	1974.42		-185.16	0
95	GFP hi_mouse1_MyoG_011.nd2	1929.97		-229.61	0
96	GFP hi_mouse1_MyoG_012.nd2	2424.27	2118.77	305.5	305.5
97	GFP hi_mouse1_MyoG_012.nd2	2316.75		197.98	197.98
98	GFP hi_mouse1_MyoG_012.nd2	2303.91		185.14	185.14
99	GFP hi_mouse1_MyoG_012.nd2	2346.87		228.1	228.1
100	GFP hi_mouse1_MyoG_012.nd2	1838.95		-279.82	0
101	GFP hi_mouse1_MyoG_012.nd2	2023.27		-95.5	0
102	GFP hi_mouse1_MyoG_012.nd2	2398.65		279.88	279.88
103	GFP hi_mouse1_MyoG_012.nd2	2296.69		177.92	177.92
104	GFP hi_mouse1_MyoG_012.nd2	2124.18		5.41	5.41
105	GFP hi_mouse1_MyoG_013.nd2	2491.19		239.51	239.51
106	GFP hi_mouse1_MyoG_013.nd2	2455.45		203.77	203.77
107	GFP hi_mouse1_MyoG_013.nd2	2507.86		256.18	256.18
108	GFP hi_mouse1_MyoG_013.nd2	2015.85		-235.83	0
109	GFP hi_mouse1_MyoG_013.nd2	2255.86		4.18	4.18
110	GFP hi_mouse1_MyoG_013.nd2	2382.3		130.62	130.62
111	GFP hi_mouse1_MyoG_013.nd2	2545.54		293.86	293.86
112	GFP hi_mouse1_MyoG_013.nd2	2460.01		208.33	208.33
113	GFP hi_mouse1_MyoG_013.nd2	1983.21		-268.47	0
114	GFP hi_mouse1_MyoG_013.nd2	2461.21		209.53	209.53
115	GFP hi_mouse1_MyoG_013.nd2	2396.92		145.24	145.24
116	GFP hi_mouse1_MyoG_013.nd2	2167.96		-83.72	0
117	GFP hi_mouse1_MyoG_013.nd2	2345.09		93.41	93.41
118	GFP hi_mouse1_MyoG_013.nd2	2479.66		227.98	227.98
119	GFP hi_mouse1_MyoG_014.nd2	2764.49	2322.39	442.1	442.1
120	GFP hi_mouse1_MyoG_014.nd2	2397.23		74.84	74.84
121	GFP hi_mouse1_MyoG_014.nd2	2509.18		186.79	186.79
122	GFP hi_mouse1_MyoG_014.nd2	2686.03		363.64	363.64
123	GFP hi_mouse1_MyoG_014.nd2	2545.61		223.22	223.22
124	GFP hi_mouse1_MyoG_014.nd2	2522.88		200.49	200.49
125	GFP hi_mouse1_MyoG_014.nd2	2590.1		267.71	267.71
126	GFP hi_mouse1_MyoG_014.nd2	2241.49		-80.9	0
127	GFP hi_mouse1_MyoG_015.nd2	1203.46	1074.28	129.18	129.18
128	GFP hi_mouse1_MyoG_015.nd2	1225.73		151.45	151.45
129	GFP hi_mouse1_MyoG_015.nd2	1182.61		108.33	108.33
130	GFP hi_mouse1_MyoG_015.nd2	1129.77		55.49	55.49
131	GFP hi_mouse1_MyoG_015.nd2	1142.21		67.93	67.93
132	GFP hi_mouse1_MyoG_015.nd2	1024.6		-49.68	0
133	GFP hi_mouse1_MyoG_015.nd2	1047.64		-26.64	0
134	GFP hi_mouse1_MyoG_016.nd2	1075.1	1150.46	-75.3567	0
135	GFP hi_mouse1_MyoG_016.nd2	1197.04		46.5833	46.5833
136	GFP hi_mouse1_MyoG_016.nd2	1307.58		157.123	157.123
137	GFP hi_mouse1_MyoG_016.nd2	1202.5		52.0433	52.0433
138	GFP hi_mouse1_MyoG_016.nd2	1206.07		55.6133	55.6133
139	GFP hi_mouse1_MyoG_016.nd2	1367.01		216.553	216.553
140	GFP hi_mouse1_MyoG_016.nd2	1257.39		106.933	106.933
141	GFP hi_mouse1_MyoG_016.nd2	1568.38		417.923	417.923
142	GFP hi_mouse1_MyoG_016.nd2	1291.37		140.913	140.913
143	GFP hi_mouse1_MyoG_016.nd2	1152.4		1.94333	1.94333
144	GFP hi_mouse1_MyoG_017.nd2	1246.82	1087.64	159.177	159.177
145	GFP hi_mouse1_MyoG_017.nd2	1228.12		140.477	140.477
146	GFP hi_mouse1_MyoG_017.nd2	1220.58		132.937	132.937
147	GFP hi_mouse1_MyoG_017.nd2	1301.48		213.837	213.837
148	GFP hi_mouse1_MyoG_017.nd2	1266.67		179.027	179.027
149	GFP hi_mouse1_MyoG_017.nd2	1205.73		118.087	118.087
150	GFP hi_mouse1_MyoG_017.nd2	1177.38		89.7367	89.7367
151	GFP hi_mouse1_MyoG_017.nd2	1123.43		35.7867	35.7867
152	GFP hi_mouse1_MyoG_018.nd2	1437.71	1069.84	367.87	367.87
153	GFP hi_mouse1_MyoG_018.nd2	1245.48		175.64	175.64
154	GFP hi_mouse1_MyoG_018.nd2	1285.45		215.61	215.61
155	GFP hi_mouse1_MyoG_018.nd2	1316.87		247.03	247.03
156	GFP hi_mouse1_MyoG_018.nd2	1150.29		80.45	80.45
157	GFP hi_mouse1_MyoG_018.nd2	1097.4		27.56	27.56
158	GFP hi_mouse1_MyoG_018.nd2	1187.38		117.54	117.54
159	GFP hi_mouse1_MyoG_018.nd2	1140.28		70.44	70.44
160	GFP hi_mouse1_MyoG_018.nd2	1125.53		55.69	55.69
161	GFP hi_mouse1_MyoG_018.nd2	1170.18		100.34	100.34
162	GFP hi_mouse1_MyoG_018.nd2	1103.25		33.41	33.41
163	GFP hi_mouse1_MyoG_018.nd2	1028.7		-41.14	0
164	GFP hi_mouse1_MyoG_018.nd2	1144.59		74.75	74.75
165	GFP hi_mouse1_MyoG_018.nd2	1051.95		-17.89	0
166	GFP hi_mouse1_MyoG_018.nd2	1069.8		-0.04	0
167	GFP hi_mouse1_MyoG_018.nd2	1273.28		203.44	203.44
168	GFP hi_mouse1_MyoG_018.nd2	1164.76		94.92	94.92
169	GFP hi_mouse1_MyoG_019.nd2	1253.6	1103.63	149.973	149.973
170	GFP hi_mouse1_MyoG_019.nd2	1405.39		301.763	301.763
171	GFP hi_mouse1_MyoG_019.nd2	1325.44		221.813	221.813
172	GFP hi_mouse1_MyoG_019.nd2	1514.3		410.673	410.673
173	GFP hi_mouse1_MyoG_019.nd2	1216.15		112.523	112.523
174	GFP hi_mouse1_MyoG_019.nd2	1283.37		179.743	179.743
175	GFP hi_mouse1_MyoG_019.nd2	1290.63		187.003	187.003
176	GFP hi_mouse1_MyoG_019.nd2	1246.95		143.323	143.323
177	GFP hi_mouse1_MyoG_019.nd2	1309.75		206.123	206.123
178	GFP hi_mouse1_MyoG_019.nd2	1212.36		108.733	108.733
179	GFP hi_mouse1_MyoG_019.nd2	1220.99		117.363	117.363
180	GFP hi_mouse1_MyoG_019.nd2	1076.08		-27.5467	0
181	GFP hi_mouse1_MyoG_019.nd2	914.97		-188.657	0
182	GFP hi_mouse1_MyoG_019.nd2	966.84		-136.787	0
183	GFP hi_mouse1_MyoG_019.nd2	1135.69		32.0633	32.0633
184	GFP hi_mouse1_MyoG_019.nd2	924.07		-179.557	0
185	GFP hi_mouse1_MyoG_019.nd2	1050.98		-52.6467	0
186	GFP hi_mouse1_MyoG_019.nd2	1237.56		133.933	133.933
187	GFP hi_mouse1_MyoG_019.nd2	1311.64		208.013	208.013
188	GFP hi_mouse1_MyoG_019.nd2	1219.06		115.433	115.433
189	GFP hi_mouse1_MyoG_019.nd2	1220.57		116.943	116.943
190	GFP hi_mouse1_MyoG_019.nd2	1201.1		97.4733	97.4733
191	GFP hi_mouse1_MyoG_019.nd2	1115.64		12.0133	12.0133
192	GFP hi_mouse1_MyoG_020.nd2	1388.29	1197.42	190.873	190.873
193	GFP hi_mouse1_MyoG_020.nd2	1563.98		366.563	366.563
194	GFP hi_mouse1_MyoG_020.nd2	1623.62		426.203	426.203
195	GFP hi_mouse1_MyoG_020.nd2	1303.32		105.903	105.903
196	GFP hi_mouse1_MyoG_020.nd2	1343.49		146.073	146.073
197	GFP hi_mouse1_MyoG_020.nd2	1247.01		49.5933	49.5933
198	GFP hi_mouse1_MyoG_020.nd2	1216.15		18.7333	18.7333
199	GFP hi_mouse1_MyoG_020.nd2	1285.49		88.0733	88.0733
200	GFP hi_mouse1_MyoG_020.nd2	1219.77		22.3533	22.3533
201	GFP hi_mouse1_MyoG_020.nd2	1201.63		4.21333	4.21333
202	GFP hi_mouse1_MyoG_020.nd2	1276.71		79.2933	79.2933
203	GFP hi_mouse1_MyoG_020.nd2	1209.06		11.6433	11.6433
204	GFP hi_mouse1_MyoG_020.nd2	1157.77		-39.6467	0
205	GFP hi_mouse1_MyoG_020.nd2	1258.32		60.9033	60.9033
206	GFP hi_mouse1_MyoG_020.nd2	1264.76		67.3433	67.3433
207	GFP hi_mouse1_MyoG_020.nd2	1362.68		165.263	165.263
208	GFP hi_mouse1_MyoG_020.nd2	1475.21		277.793	277.793
209	GFP hi_mouse1_MyoG_020.nd2	1359.9		162.483	162.483
210	GFP hi_mouse1_MyoG_020.nd2	1389.31		191.893	191.893
211	GFP hi_mouse1_MyoG_021.nd2	1360.51	1261.06	99.45	99.45
212	GFP hi_mouse1_MyoG_021.nd2	1451.04		189.98	189.98
213	GFP hi_mouse1_MyoG_021.nd2	1443.58		182.52	182.52
214	GFP hi_mouse1_MyoG_021.nd2	1459.09		198.03	198.03
215	GFP hi_mouse1_MyoG_021.nd2	1430.94		169.88	169.88
216	GFP hi_mouse1_MyoG_021.nd2	1336.07		75.01	75.01
217	GFP hi_mouse1_MyoG_021.nd2	1209.86		-51.2	0
218	GFP hi_mouse1_MyoG_021.nd2	1403.27		142.21	142.21
219	GFP hi_mouse1_MyoG_021.nd2	1346.52		85.46	85.46
220	GFP hi_mouse1_MyoG_021.nd2	1285.96		24.9	24.9
221	GFP hi_mouse1_MyoG_021.nd2	1356.22		95.16	95.16
222	GFP hi_mouse1_MyoG_021.nd2	1357.43		96.37	96.37
223	GFP hi_mouse1_MyoG_021.nd2	1255.25		-5.81	0
224	GFP hi_mouse1_MyoG_021.nd2	1359.77		98.71	98.71
225	GFP hi_mouse1_MyoG_021.nd2	1434.14		173.08	173.08
226	GFP hi_mouse1_MyoG_021.nd2	1219.75		-41.31	0
227	GFP hi_mouse1_MyoG_021.nd2	1141.75		-119.31	0
228	GFP hi_mouse1_MyoG_021.nd2	1115.25		-145.81	0
229	GFP hi_mouse1_MyoG_022.nd2	1386.3	1203.8	182.503	182.503
230	GFP hi_mouse1_MyoG_022.nd2	1454.77		250.973	250.973
231	GFP hi_mouse1_MyoG_022.nd2	1333.59		129.793	129.793
232	GFP hi_mouse1_MyoG_022.nd2	1324.87		121.073	121.073
233	GFP hi_mouse1_MyoG_022.nd2	1282.09		78.2933	78.2933
234	GFP hi_mouse1_MyoG_022.nd2	1170.2		-33.5967	0
235	GFP hi_mouse1_MyoG_022.nd2	1389.93		186.133	186.133
236	GFP hi_mouse1_MyoG_022.nd2	1258.22		54.4233	54.4233
237	GFP hi_mouse1_MyoG_022.nd2	1339.44		135.643	135.643
238	GFP hi_mouse1_MyoG_022.nd2	1305.33		101.533	101.533
239	GFP hi_mouse1_MyoG_022.nd2	1376.14		172.343	172.343
240	GFP hi_mouse1_MyoG_022.nd2	1413.98		210.183	210.183
241	GFP hi_mouse1_MyoG_022.nd2	1570.38		366.583	366.583
242	GFP hi_mouse1_MyoG_022.nd2	1202.47		-1.32667	0
243	GFP hi_mouse1_MyoG_023.nd2	1335.73	1237.01	98.7167	98.7167
244	GFP hi_mouse1_MyoG_023.nd2	1326.63		89.6167	89.6167
245	GFP hi_mouse1_MyoG_023.nd2	1554.16		317.147	317.147
246	GFP hi_mouse1_MyoG_023.nd2	1421.57		184.557	184.557
247	GFP hi_mouse1_MyoG_023.nd2	1359.44		122.427	122.427
248	GFP hi_mouse1_MyoG_023.nd2	1266.95		29.9367	29.9367
249	GFP hi_mouse1_MyoG_023.nd2	1334.65		97.6367	97.6367
250	GFP hi_mouse1_MyoG_023.nd2	1293.03		56.0167	56.0167
251	GFP hi_mouse1_MyoG_023.nd2	1284.14		47.1267	47.1267
252	GFP hi_mouse1_MyoG_023.nd2	1205.33		-31.6833	0
253	GFP hi_mouse1_MyoG_023.nd2	1339.61		102.597	102.597
254	GFP hi_mouse1_MyoG_023.nd2	1387.23		150.217	150.217
255	GFP hi_mouse1_MyoG_023.nd2	1330.74		93.7267	93.7267
256	GFP hi_mouse1_MyoG_023.nd2	1120.74		-116.273	0
257	GFP hi_mouse1_MyoG_023.nd2	1392.09		155.077	155.077
258	GFP hi_mouse1_MyoG_023.nd2	1267.51		30.4967	30.4967
259	GFP hi_mouse1_MyoG_024.nd2	1441.85	1202.14	239.707	239.707
260	GFP hi_mouse1_MyoG_024.nd2	1168.15		-33.9933	0
261	GFP hi_mouse1_MyoG_024.nd2	1447.24		245.097	245.097
262	GFP hi_mouse1_MyoG_025.nd2	1404.33	1232.66	171.667	171.667
263	GFP hi_mouse1_MyoG_025.nd2	1365.89		133.227	133.227
264	GFP hi_mouse1_MyoG_025.nd2	1416.45		183.787	183.787
265	GFP hi_mouse1_MyoG_025.nd2	1431.91		199.247	199.247
266	GFP hi_mouse1_MyoG_025.nd2	1246.56		13.8967	13.8967
267	GFP hi_mouse1_MyoG_025.nd2	1205.05		-27.6133	0
268	GFP hi_mouse1_MyoG_025.nd2	1398.4		165.737	165.737
269	GFP hi_mouse1_MyoG_025.nd2	1182.03		-50.6333	0
270	GFP hi_mouse1_MyoG_025.nd2	1268.38		35.7167	35.7167
271	GFP hi_mouse1_MyoG_026.nd2	1547.07	1235.1	311.97	311.97
272	GFP hi_mouse1_MyoG_026.nd2	1298.66		63.56	63.56
273	GFP hi_mouse1_MyoG_026.nd2	1235.58		0.48	0.48
274	GFP hi_mouse1_MyoG_026.nd2	1293.14		58.04	58.04
275	GFP hi_mouse1_MyoG_026.nd2	1200.55		-34.55	0
276	GFP hi_mouse1_MyoG_026.nd2	1298.49		63.39	63.39
277	GFP hi_mouse1_MyoG_026.nd2	1304.96		69.86	69.86
278	GFP hi_mouse1_MyoG_026.nd2	1405.37		170.27	170.27
279	GFP hi_mouse1_MyoG_026.nd2	1062.74		-172.36	0
280	GFP hi_mouse1_MyoG_027.nd2	1402.49	1205.72	196.767	196.767
281	GFP hi_mouse1_MyoG_027.nd2	1455.1		249.377	249.377
282	GFP hi_mouse1_MyoG_027.nd2	1392.32		186.597	186.597
283	GFP hi_mouse1_MyoG_027.nd2	1543.66		337.937	337.937
284	GFP hi_mouse1_MyoG_027.nd2	1473.13		267.407	267.407
285	GFP hi_mouse1_MyoG_027.nd2	1347.94		142.217	142.217
286	GFP hi_mouse1_MyoG_027.nd2	1282.94		77.217	77.217
287	GFP hi_mouse1_MyoG_027.nd2	1270.89		65.167	65.167
288	GFP hi_mouse1_MyoG_027.nd2	1352.1		146.377	146.377
289	GFP hi_mouse1_MyoG_027.nd2	1219.23		13.507	13.507
290	GFP hi_mouse1_MyoG_027.nd2	1270.77		65.047	65.047
291	GFP hi_mouse1_MyoG_027.nd2	1219.72		13.997	13.997
292	GFP hi_mouse1_MyoG_027.nd2	1298.17		92.447	92.447
293	GFP hi_mouse1_MyoG_027.nd2	1309.26		103.537	103.537
294	GFP hi_mouse1_MyoG_027.nd2	1143.24		-62.483	0
295	GFP hi_mouse1_MyoG_027.nd2	1173.31		-32.413	0
296	GFP hi_mouse1_MyoG_027.nd2	1122.7		-83.023	0
297	GFP hi_mouse1_MyoG_028.nd2	1449.79	1184.36	265.427	265.427
298	GFP hi_mouse1_MyoG_028.nd2	1296.69		112.327	112.327
299	GFP hi_mouse1_MyoG_028.nd2	1431.19		246.827	246.827
300	GFP hi_mouse1_MyoG_028.nd2	1439.86		255.497	255.497
301	GFP hi_mouse1_MyoG_028.nd2	1230.56		46.197	46.197
302	GFP hi_mouse1_MyoG_028.nd2	1202.85		18.487	18.487
303	GFP hi_mouse1_MyoG_028.nd2	1378.04		193.677	193.677
304	GFP hi_mouse1_MyoG_028.nd2	1272.56		88.197	88.197
305	GFP hi_mouse1_MyoG_028.nd2	1243.62		59.257	59.257
306	GFP hi_mouse1_MyoG_028.nd2	1242.08		57.717	57.717
307	GFP hi_mouse1_MyoG_028.nd2	1200		15.637	15.637
308	GFP hi_mouse1_MyoG_028.nd2	1248.29		63.927	63.927
309	GFP hi_mouse1_MyoG_028.nd2	1239.28		54.917	54.917
310	GFP hi_mouse1_MyoG_028.nd2	1394.49		210.127	210.127
311	GFP hi_mouse1_MyoG_028.nd2	1304.39		120.027	120.027
312	GFP hi_mouse1_MyoG_028.nd2	1067.27		-117.093	0
313	GFP hi_mouse1_MyoG_028.nd2	1350.71		166.347	166.347
314	GFP hi_mouse1_MyoG_028.nd2	1245.89		61.527	61.527

## Sheet: Med GFP_mouse1
Item	Source	MyoG (TxRed) mean intensity	TxRed background	MyoG mean intensity	Corrected minus to zeros
1	GFP med_mouse1_MyoG_001.nd2	1336.42	1214.25	122.173	122.173
2	GFP med_mouse1_MyoG_001.nd2	1272.24		57.9933	57.9933
3	GFP med_mouse1_MyoG_001.nd2	1265.86		51.6133	51.6133
4	GFP med_mouse1_MyoG_001.nd2	1108.32		-105.927	0
5	GFP med_mouse1_MyoG_001.nd2	1314.94		100.693	100.693
6	GFP med_mouse1_MyoG_001.nd2	1320.79		106.543	106.543
7	GFP med_mouse1_MyoG_001.nd2	1281.43		67.1833	67.1833
8	GFP med_mouse1_MyoG_002.nd2	1130.28	1250.77	-120.49	0
9	GFP med_mouse1_MyoG_002.nd2	1343.3		92.53	92.53
10	GFP med_mouse1_MyoG_002.nd2	1305.16		54.39	54.39
11	GFP med_mouse1_MyoG_002.nd2	1251.03		0.26	0.26
12	GFP med_mouse1_MyoG_002.nd2	1343.04		92.27	92.27
13	GFP med_mouse1_MyoG_002.nd2	1201.51		-49.26	0
14	GFP med_mouse1_MyoG_003.nd2	1397.25	1240.93	156.32	156.32
15	GFP med_mouse1_MyoG_003.nd2	1455.73		214.8	214.8
16	GFP med_mouse1_MyoG_003.nd2	1289.64		48.71	48.71
17	GFP med_mouse1_MyoG_003.nd2	1407.26		166.33	166.33
18	GFP med_mouse1_MyoG_003.nd2	1395.43		154.5	154.5
19	GFP med_mouse1_MyoG_003.nd2	1301.11		60.18	60.18
20	GFP med_mouse1_MyoG_003.nd2	1162.04		-78.89	0
21	GFP med_mouse1_MyoG_003.nd2	1204.38		-36.55	0
22	GFP med_mouse1_MyoG_003.nd2	1297.69		56.76	56.76
23	GFP med_mouse1_MyoG_003.nd2	1226.05		-14.88	0
24	GFP med_mouse1_MyoG_003.nd2	1155.41		-85.52	0
25	GFP med_mouse1_MyoG_003.nd2	1287.22		46.29	46.29
26	GFP med_mouse1_MyoG_003.nd2	1293.84		52.91	52.91
27	GFP med_mouse1_MyoG_004.nd2	1355.54	1257.28	98.2633	98.2633
28	GFP med_mouse1_MyoG_004.nd2	1193.11		-64.1667	0
29	GFP med_mouse1_MyoG_004.nd2	1300.94		43.6633	43.6633
30	GFP med_mouse1_MyoG_004.nd2	1298.52		41.2433	41.2433
31	GFP med_mouse1_MyoG_004.nd2	1363.81		106.533	106.533
32	GFP med_mouse1_MyoG_004.nd2	1370.85		113.573	113.573
33	GFP med_mouse1_MyoG_004.nd2	1507.19		249.913	249.913
34	GFP med_mouse1_MyoG_005.nd2	1342.81	1257.44	85.37	85.37
35	GFP med_mouse1_MyoG_005.nd2	1292.95		35.51	35.51
36	GFP med_mouse1_MyoG_005.nd2	1375.66		118.22	118.22
37	GFP med_mouse1_MyoG_005.nd2	1436.76		179.32	179.32
38	GFP med_mouse1_MyoG_005.nd2	1334.78		77.34	77.34
39	GFP med_mouse1_MyoG_005.nd2	1381.6		124.16	124.16
40	GFP med_mouse1_MyoG_005.nd2	1302.75		45.31	45.31
41	GFP med_mouse1_MyoG_005.nd2	1157.91		-99.53	0
42	GFP med_mouse1_MyoG_005.nd2	1308.59		51.15	51.15
43	GFP med_mouse1_MyoG_005.nd2	1066.55		-190.89	0
44	GFP med_mouse1_MyoG_006.nd2	1259.54	1247.84	11.6967	11.6967
45	GFP med_mouse1_MyoG_006.nd2	1494.85		247.007	247.007
46	GFP med_mouse1_MyoG_006.nd2	1386.27		138.427	138.427
47	GFP med_mouse1_MyoG_006.nd2	1168.96		-78.8833	0
48	GFP med_mouse1_MyoG_006.nd2	1505.98		258.137	258.137
49	GFP med_mouse1_MyoG_006.nd2	1429.96		182.117	182.117
50	GFP med_mouse1_MyoG_006.nd2	1249.04		1.19667	1.19667
51	GFP med_mouse1_MyoG_006.nd2	1415.72		167.877	167.877
52	GFP med_mouse1_MyoG_006.nd2	1574.5		326.657	326.657
53	GFP med_mouse1_MyoG_006.nd2	1590.3		342.457	342.457
54	GFP med_mouse1_MyoG_006.nd2	1553.84		305.997	305.997
55	GFP med_mouse1_MyoG_007.nd2	1317.57	1251.37	66.2033	66.2033
56	GFP med_mouse1_MyoG_007.nd2	1414.01		162.643	162.643
57	GFP med_mouse1_MyoG_007.nd2	1375.17		123.803	123.803
58	GFP med_mouse1_MyoG_007.nd2	1390.74		139.373	139.373
59	GFP med_mouse1_MyoG_007.nd2	1251.37		0.00333333	0.00333333
60	GFP med_mouse1_MyoG_008.nd2	1146.53	1264.08	-117.547	0
61	GFP med_mouse1_MyoG_008.nd2	1264.49		0.413333	0.413333
62	GFP med_mouse1_MyoG_008.nd2	1333.79		69.7133	69.7133
63	GFP med_mouse1_MyoG_008.nd2	1313.32		49.2433	49.2433
64	GFP med_mouse1_MyoG_008.nd2	1387.94		123.863	123.863
65	GFP med_mouse1_MyoG_008.nd2	1517.84		253.763	253.763
66	GFP med_mouse1_MyoG_008.nd2	1555.51		291.433	291.433
67	GFP med_mouse1_MyoG_008.nd2	1455.83		191.753	191.753
68	GFP med_mouse1_MyoG_008.nd2	1271.32		7.24333	7.24333
69	GFP med_mouse1_MyoG_008.nd2	1270.68		6.60333	6.60333
70	GFP med_mouse1_MyoG_008.nd2	1274.7		10.6233	10.6233
71	GFP med_mouse1_MyoG_009.nd2	1219.46	1237.76	-18.3	0
72	GFP med_mouse1_MyoG_009.nd2	1258.93		21.17	21.17
73	GFP med_mouse1_MyoG_009.nd2	1361.54		123.78	123.78
74	GFP med_mouse1_MyoG_009.nd2	1583.26		345.5	345.5
75	GFP med_mouse1_MyoG_009.nd2	1381.33		143.57	143.57
76	GFP med_mouse1_MyoG_009.nd2	1358.27		120.51	120.51
77	GFP med_mouse1_MyoG_009.nd2	1411.78		174.02	174.02
78	GFP med_mouse1_MyoG_009.nd2	1255.96		18.2	18.2
79	GFP med_mouse1_MyoG_009.nd2	1266.87		29.11	29.11
80	GFP med_mouse1_MyoG_009.nd2	1085.09		-152.67	0
81	GFP med_mouse1_MyoG_010.nd2	1531.27	1207.31	323.957	323.957
82	GFP med_mouse1_MyoG_010.nd2	1339.56		132.247	132.247
83	GFP med_mouse1_MyoG_010.nd2	1311.03		103.717	103.717
84	GFP med_mouse1_MyoG_010.nd2	1165.07		-42.2433	0
85	GFP med_mouse1_MyoG_010.nd2	1250.81		43.4967	43.4967
86	GFP med_mouse1_MyoG_010.nd2	1315.29		107.977	107.977
87	GFP med_mouse1_MyoG_010.nd2	1400.65		193.337	193.337
88	GFP med_mouse1_MyoG_010.nd2	1255.53		48.2167	48.2167
89	GFP med_mouse1_MyoG_010.nd2	1220.81		13.4967	13.4967
90	GFP med_mouse1_MyoG_011.nd2	1222.8	1181.47	41.3267	41.3267
91	GFP med_mouse1_MyoG_011.nd2	1456.62		275.147	275.147
92	GFP med_mouse1_MyoG_011.nd2	1407.21		225.737	225.737
93	GFP med_mouse1_MyoG_011.nd2	1363.37		181.897	181.897
94	GFP med_mouse1_MyoG_011.nd2	1130.15		-51.3233	0
95	GFP med_mouse1_MyoG_011.nd2	1277.12		95.6467	95.6467
96	GFP med_mouse1_MyoG_011.nd2	1187.43		5.95667	5.95667
97	GFP med_mouse1_MyoG_011.nd2	1181.65		0.176667	0.176667
98	GFP med_mouse1_MyoG_011.nd2	1279.59		98.1167	98.1167
99	GFP med_mouse1_MyoG_011.nd2	1148.36		-33.1133	0
100	GFP med_mouse1_MyoG_012.nd2	1459.88	1199.77	260.11	260.11
101	GFP med_mouse1_MyoG_012.nd2	1321.22		121.45	121.45
102	GFP med_mouse1_MyoG_012.nd2	1466.94		267.17	267.17
103	GFP med_mouse1_MyoG_012.nd2	1417.19		217.42	217.42
104	GFP med_mouse1_MyoG_012.nd2	1388.18		188.41	188.41
105	GFP med_mouse1_MyoG_012.nd2	1179.09		-20.68	0
106	GFP med_mouse1_MyoG_012.nd2	1263.89		64.12	64.12
107	GFP med_mouse1_MyoG_012.nd2	1319.14		119.37	119.37
108	GFP med_mouse1_MyoG_012.nd2	1391.92		192.15	192.15
109	GFP med_mouse1_MyoG_012.nd2	1393.78		194.01	194.01
110	GFP med_mouse1_MyoG_012.nd2	1240.46		40.69	40.69
111	GFP med_mouse1_MyoG_012.nd2	1405.33		205.56	205.56
112	GFP med_mouse1_MyoG_012.nd2	1668.94		469.17	469.17
113	GFP med_mouse1_MyoG_013.nd2	1432.46	1203.25	229.213	229.213
114	GFP med_mouse1_MyoG_013.nd2	1392.37		189.123	189.123
115	GFP med_mouse1_MyoG_013.nd2	1242.49		39.2433	39.2433
116	GFP med_mouse1_MyoG_013.nd2	1431.91		228.663	228.663
117	GFP med_mouse1_MyoG_013.nd2	1167.46		-35.7867	0
118	GFP med_mouse1_MyoG_013.nd2	1422.7		219.453	219.453
119	GFP med_mouse1_MyoG_013.nd2	1242.9		39.6533	39.6533
120	GFP med_mouse1_MyoG_013.nd2	1302.85		99.6033	99.6033
121	GFP med_mouse1_MyoG_013.nd2	1250.94		47.6933	47.6933
122	GFP med_mouse1_MyoG_013.nd2	1383.8		180.553	180.553
123	GFP med_mouse1_MyoG_013.nd2	1255.74		52.4933	52.4933
124	GFP med_mouse1_MyoG_013.nd2	1238.35		35.1033	35.1033
125	GFP med_mouse1_MyoG_013.nd2	1144.15		-59.0967	0
126	GFP med_mouse1_MyoG_013.nd2	1287		83.7533	83.7533
127	GFP med_mouse1_MyoG_013.nd2	1245.18		41.9333	41.9333
128	GFP med_mouse1_MyoG_013.nd2	1160.75		-42.4967	0
129	GFP med_mouse1_MyoG_013.nd2	1157.77		-45.4767	0
130	GFP med_mouse1_MyoG_013.nd2	1265.59		62.3433	62.3433
131	GFP med_mouse1_MyoG_013.nd2	1090.88		-112.367	0
132	GFP med_mouse1_MyoG_014.nd2	1422.9	1256.72	166.18	166.18
133	GFP med_mouse1_MyoG_014.nd2	1249.42		-7.3	0
134	GFP med_mouse1_MyoG_014.nd2	965.92		-290.8	0
135	GFP med_mouse1_MyoG_014.nd2	1331.84		75.12	75.12
136	GFP med_mouse1_MyoG_014.nd2	1205.06		-51.66	0
137	GFP med_mouse1_MyoG_014.nd2	1361.38		104.66	104.66
138	GFP med_mouse1_MyoG_014.nd2	1119.08		-137.64	0
139	GFP med_mouse1_MyoG_014.nd2	1333.38		76.66	76.66
140	GFP med_mouse1_MyoG_015.nd2	1511.87	1283.7	228.167	228.167
141	GFP med_mouse1_MyoG_015.nd2	1402.68		118.977	118.977
142	GFP med_mouse1_MyoG_015.nd2	1230.52		-53.1833	0
143	GFP med_mouse1_MyoG_015.nd2	1358.57		74.8667	74.8667
144	GFP med_mouse1_MyoG_015.nd2	1317.13		33.4267	33.4267
145	GFP med_mouse1_MyoG_015.nd2	1357.85		74.1467	74.1467
146	GFP med_mouse1_MyoG_015.nd2	1297.22		13.5167	13.5167
147	GFP med_mouse1_MyoG_015.nd2	1359.9		76.1967	76.1967
148	GFP med_mouse1_MyoG_015.nd2	1356.68		72.9767	72.9767
149	GFP med_mouse1_MyoG_016.nd2	1348.31	1214.29	134.017	134.017
150	GFP med_mouse1_MyoG_016.nd2	1392.74		178.447	178.447
151	GFP med_mouse1_MyoG_016.nd2	1359.04		144.747	144.747
152	GFP med_mouse1_MyoG_016.nd2	1295.1		80.8067	80.8067
153	GFP med_mouse1_MyoG_016.nd2	1300.49		86.1967	86.1967
154	GFP med_mouse1_MyoG_016.nd2	1369.38		155.087	155.087
155	GFP med_mouse1_MyoG_016.nd2	1358.31		144.017	144.017
156	GFP med_mouse1_MyoG_016.nd2	1277.15		62.8567	62.8567
157	GFP med_mouse1_MyoG_016.nd2	1159.71		-54.5833	0
158	GFP med_mouse1_MyoG_017.nd2	1345.68	1189.09	156.59	156.59
159	GFP med_mouse1_MyoG_017.nd2	1293.75		104.66	104.66
160	GFP med_mouse1_MyoG_017.nd2	1379.54		190.45	190.45
161	GFP med_mouse1_MyoG_017.nd2	1332.27		143.18	143.18
162	GFP med_mouse1_MyoG_017.nd2	1260.4		71.31	71.31
163	GFP med_mouse1_MyoG_017.nd2	1231.02		41.93	41.93
164	GFP med_mouse1_MyoG_017.nd2	1269.6		80.51	80.51
165	GFP med_mouse1_MyoG_017.nd2	1305.56		116.47	116.47
166	GFP med_mouse1_MyoG_017.nd2	1223.41		34.32	34.32
167	GFP med_mouse1_MyoG_017.nd2	1349.85		160.76	160.76
168	GFP med_mouse1_MyoG_017.nd2	1155.85		-33.24	0
169	GFP med_mouse1_MyoG_017.nd2	1156.87		-32.22	0
170	GFP med_mouse1_MyoG_017.nd2	1142.26		-46.83	0
171	GFP med_mouse1_MyoG_018.nd2	1287.37	1099.43	187.94	187.94
172	GFP med_mouse1_MyoG_018.nd2	1238.38		138.95	138.95
173	GFP med_mouse1_MyoG_018.nd2	1459.28		359.85	359.85
174	GFP med_mouse1_MyoG_018.nd2	1313.19		213.76	213.76
175	GFP med_mouse1_MyoG_018.nd2	1330.62		231.19	231.19
176	GFP med_mouse1_MyoG_018.nd2	1356.36		256.93	256.93
177	GFP med_mouse1_MyoG_018.nd2	1058.43		-41	0
178	GFP med_mouse1_MyoG_018.nd2	1173.94		74.51	74.51
179	GFP med_mouse1_MyoG_018.nd2	1257.03		157.6	157.6
180	GFP med_mouse1_MyoG_018.nd2	1238.08		138.65	138.65
181	GFP med_mouse1_MyoG_018.nd2	1271.28		171.85	171.85
182	GFP med_mouse1_MyoG_019.nd2	1359.45	1189.14	170.307	170.307
183	GFP med_mouse1_MyoG_019.nd2	1392.56		203.417	203.417
184	GFP med_mouse1_MyoG_019.nd2	1538.69		349.547	349.547
185	GFP med_mouse1_MyoG_019.nd2	1627.01		437.867	437.867
186	GFP med_mouse1_MyoG_019.nd2	1455.47		266.327	266.327
187	GFP med_mouse1_MyoG_019.nd2	1259.78		70.6367	70.6367
188	GFP med_mouse1_MyoG_019.nd2	1261.91		72.7667	72.7667
189	GFP med_mouse1_MyoG_019.nd2	1206.41		17.2667	17.2667
190	GFP med_mouse1_MyoG_019.nd2	1191.7		2.55667	2.55667
191	GFP med_mouse1_MyoG_019.nd2	1160.66		-28.4833	0
192	GFP med_mouse1_MyoG_019.nd2	1179.13		-10.0133	0
193	GFP med_mouse1_MyoG_019.nd2	1259.09		69.9467	69.9467
194	GFP med_mouse1_MyoG_019.nd2	1313.68		124.537	124.537
195	GFP med_mouse1_MyoG_019.nd2	1264.63		75.4867	75.4867
196	GFP med_mouse1_MyoG_019.nd2	1316.03		126.887	126.887
197	GFP med_mouse1_MyoG_019.nd2	1452.58		263.437	263.437
198	GFP med_mouse1_MyoG_019.nd2	1311.67		122.527	122.527

## Sheet: Low GFP_mouse1
Item	Source	MyoG (TxRed) mean intensity	TxRed background	MyoG mean intensity	Corrected minus to zeros
1	GFP lo_mouse1_MyoG_001.nd2	1378.54	1191.35	187.187	187.187
2	GFP lo_mouse1_MyoG_001.nd2	1127.64		-63.713	0
3	GFP lo_mouse1_MyoG_001.nd2	1312.11		120.757	120.757
4	GFP lo_mouse1_MyoG_002.nd2	1213.02	1125.64	87.377	87.377
5	GFP lo_mouse1_MyoG_002.nd2	1346.73		221.087	221.087
6	GFP lo_mouse1_MyoG_002.nd2	1234.58		108.937	108.937
7	GFP lo_mouse1_MyoG_002.nd2	1188.43		62.787	62.787
8	GFP lo_mouse1_MyoG_002.nd2	1308.24		182.597	182.597
9	GFP lo_mouse1_MyoG_002.nd2	1225.98		100.337	100.337
10	GFP lo_mouse1_MyoG_002.nd2	1273.05		147.407	147.407
11	GFP lo_mouse1_MyoG_003.nd2	1210.85	1183.9	26.953	26.953
12	GFP lo_mouse1_MyoG_003.nd2	1196.25		12.353	12.353
13	GFP lo_mouse1_MyoG_004.nd2	1449.19	1157.55	291.637	291.637
14	GFP lo_mouse1_MyoG_004.nd2	1442.48		284.927	284.927
15	GFP lo_mouse1_MyoG_004.nd2	1564.19		406.637	406.637
16	GFP lo_mouse1_MyoG_004.nd2	1179.41		21.857	21.857
17	GFP lo_mouse1_MyoG_004.nd2	1184.8		27.247	27.247
18	GFP lo_mouse1_MyoG_004.nd2	1180.44		22.887	22.887
19	GFP lo_mouse1_MyoG_004.nd2	1293.54		135.987	135.987
20	GFP lo_mouse1_MyoG_004.nd2	1199.7		42.147	42.147
21	GFP lo_mouse1_MyoG_005.nd2	1290.12	1256.4	33.723	33.723
22	GFP lo_mouse1_MyoG_005.nd2	1432.92		176.523	176.523
23	GFP lo_mouse1_MyoG_005.nd2	1337.17		80.773	80.773
24	GFP lo_mouse1_MyoG_005.nd2	1357.11		100.713	100.713
25	GFP lo_mouse1_MyoG_006.nd2	1167.86	1157.42	10.443	10.443
26	GFP lo_mouse1_MyoG_006.nd2	1279.29		121.873	121.873
27	GFP lo_mouse1_MyoG_006.nd2	1254.22		96.803	96.803
28	GFP lo_mouse1_MyoG_007.nd2	1505.79	1193.63	312.16	312.16
29	GFP lo_mouse1_MyoG_007.nd2	1452.95		259.32	259.32
30	GFP lo_mouse1_MyoG_007.nd2	1554.53		360.9	360.9
31	GFP lo_mouse1_MyoG_007.nd2	1131.21		-62.42	0
32	GFP lo_mouse1_MyoG_007.nd2	1251.84		58.21	58.21
33	GFP lo_mouse1_MyoG_007.nd2	1331.66		138.03	138.03
34	GFP lo_mouse1_MyoG_007.nd2	1324.93		131.3	131.3
35	GFP lo_mouse1_MyoG_007.nd2	1242.95		49.32	49.32
36	GFP lo_mouse1_MyoG_008.nd2	1399.73	1251.1	148.63	148.63
37	GFP lo_mouse1_MyoG_008.nd2	1467.41		216.31	216.31
38	GFP lo_mouse1_MyoG_008.nd2	1401.81		150.71	150.71
39	GFP lo_mouse1_MyoG_008.nd2	1396.92		145.82	145.82
40	GFP lo_mouse1_MyoG_009.nd2	1427.6	1172.47	255.127	255.127
41	GFP lo_mouse1_MyoG_009.nd2	1285.28		112.807	112.807
42	GFP lo_mouse1_MyoG_009.nd2	1350.61		178.137	178.137
43	GFP lo_mouse1_MyoG_009.nd2	1206.67		34.197	34.197
44	GFP lo_mouse1_MyoG_009.nd2	1269.78		97.307	97.307
45	GFP lo_mouse1_MyoG_009.nd2	1193.48		21.007	21.007
46	GFP lo_mouse1_MyoG_009.nd2	1476.89		304.417	304.417
47	GFP lo_mouse1_MyoG_009.nd2	1047.67		-124.803	0
48	GFP lo_mouse1_MyoG_009.nd2	1070.08		-102.393	0
49	GFP lo_mouse1_MyoG_009.nd2	1466.83		294.357	294.357
50	GFP lo_mouse1_MyoG_009.nd2	1123.81		-48.663	0
51	GFP lo_mouse1_MyoG_010.nd2	1283.08	1164.14	118.937	118.937
52	GFP lo_mouse1_MyoG_010.nd2	1286.09		121.947	121.947
53	GFP lo_mouse1_MyoG_010.nd2	1417.24		253.097	253.097
54	GFP lo_mouse1_MyoG_010.nd2	1249.53		85.387	85.387
55	GFP lo_mouse1_MyoG_010.nd2	1323.1		158.957	158.957
56	GFP lo_mouse1_MyoG_010.nd2	1366.43		202.287	202.287
57	GFP lo_mouse1_MyoG_010.nd2	1400.3		236.157	236.157
58	GFP lo_mouse1_MyoG_010.nd2	1381.86		217.717	217.717
59	GFP lo_mouse1_MyoG_010.nd2	1203.84		39.697	39.697
60	GFP lo_mouse1_MyoG_010.nd2	1239.15		75.007	75.007
61	GFP lo_mouse1_MyoG_010.nd2	1179.19		15.047	15.047
62	GFP lo_mouse1_MyoG_010.nd2	1304.53		140.387	140.387
63	GFP lo_mouse1_MyoG_010.nd2	1138.77		-25.373	0
64	GFP lo_mouse1_MyoG_010.nd2	1089.51		-74.633	0
65	GFP lo_mouse1_MyoG_011.nd2	1285.79	1056.04	229.753	229.753
66	GFP lo_mouse1_MyoG_011.nd2	1438.96		382.923	382.923
67	GFP lo_mouse1_MyoG_011.nd2	1328.4		272.363	272.363
68	GFP lo_mouse1_MyoG_011.nd2	1385.08		329.043	329.043
69	GFP lo_mouse1_MyoG_011.nd2	1119.38		63.343	63.343
70	GFP lo_mouse1_MyoG_011.nd2	1384.12		328.083	328.083
71	GFP lo_mouse1_MyoG_011.nd2	1284.51		228.473	228.473
72	GFP lo_mouse1_MyoG_011.nd2	1022.12		-33.917	0
73	GFP lo_mouse1_MyoG_011.nd2	1237.45		181.413	181.413
74	GFP lo_mouse1_MyoG_011.nd2	972.58		-83.457	0
75	GFP lo_mouse1_MyoG_011.nd2	1112.99		56.953	56.953
76	GFP lo_mouse1_MyoG_011.nd2	1164.95		108.913	108.913
77	GFP lo_mouse1_MyoG_011.nd2	1110.96		54.923	54.923
78	GFP lo_mouse1_MyoG_011.nd2	1178.64		122.603	122.603
79	GFP lo_mouse1_MyoG_011.nd2	1200.56		144.523	144.523
80	GFP lo_mouse1_MyoG_011.nd2	1227.67		171.633	171.633
81	GFP lo_mouse1_MyoG_011.nd2	998.8		-57.237	0
82	GFP lo_mouse1_MyoG_012.nd2	1160.21	1005.42	154.793	154.793
83	GFP lo_mouse1_MyoG_012.nd2	1303.11		297.693	297.693
84	GFP lo_mouse1_MyoG_012.nd2	1102.12		96.703	96.703
85	GFP lo_mouse1_MyoG_012.nd2	1050.49		45.073	45.073
86	GFP lo_mouse1_MyoG_012.nd2	1060.25		54.833	54.833
87	GFP lo_mouse1_MyoG_012.nd2	1073.86		68.443	68.443
88	GFP lo_mouse1_MyoG_012.nd2	1110.7		105.283	105.283
89	GFP lo_mouse1_MyoG_012.nd2	1198.1		192.683	192.683
90	GFP lo_mouse1_MyoG_012.nd2	1142.05		136.633	136.633
91	GFP lo_mouse1_MyoG_012.nd2	1071.05		65.633	65.633
92	GFP lo_mouse1_MyoG_012.nd2	1178.27		172.853	172.853
93	GFP lo_mouse1_MyoG_012.nd2	1020.65		15.233	15.233
94	GFP lo_mouse1_MyoG_012.nd2	1088.14		82.723	82.723
95	GFP lo_mouse1_MyoG_013.nd2	1365.79	1147.59	218.197	218.197
96	GFP lo_mouse1_MyoG_013.nd2	1394.37		246.777	246.777
97	GFP lo_mouse1_MyoG_014.nd2	1607.96	1175.48	432.477	432.477
98	GFP lo_mouse1_MyoG_014.nd2	1507.17		331.687	331.687
99	GFP lo_mouse1_MyoG_014.nd2	1390.12		214.637	214.637
100	GFP lo_mouse1_MyoG_014.nd2	1221.86		46.377	46.377
101	GFP lo_mouse1_MyoG_014.nd2	1196.03		20.547	20.547
102	GFP lo_mouse1_MyoG_015.nd2	1415.3	1198.66	216.643	216.643
103	GFP lo_mouse1_MyoG_015.nd2	1427.8		229.143	229.143
104	GFP lo_mouse1_MyoG_015.nd2	1084.4		-114.257	0
105	GFP lo_mouse1_MyoG_015.nd2	1197.63		-1.027	0
106	GFP lo_mouse1_MyoG_015.nd2	1190.55		-8.107	0
107	GFP lo_mouse1_MyoG_016.nd2	1477.93	1156.39	321.54	321.54
108	GFP lo_mouse1_MyoG_016.nd2	1271.06		114.67	114.67
109	GFP lo_mouse1_MyoG_016.nd2	1224.91		68.52	68.52
110	GFP lo_mouse1_MyoG_016.nd2	1316.06		159.67	159.67
111	GFP lo_mouse1_MyoG_016.nd2	1284.49		128.1	128.1
112	GFP lo_mouse1_MyoG_016.nd2	1434.76		278.37	278.37
113	GFP lo_mouse1_MyoG_016.nd2	1184.8		28.41	28.41
114	GFP lo_mouse1_MyoG_016.nd2	1191.71		35.32	35.32
115	GFP lo_mouse1_MyoG_017.nd2	1296.15	1073.23	222.92	222.92
116	GFP lo_mouse1_MyoG_017.nd2	1357.89		284.66	284.66
117	GFP lo_mouse1_MyoG_017.nd2	1200.2		126.97	126.97
118	GFP lo_mouse1_MyoG_017.nd2	1139.66		66.43	66.43
119	GFP lo_mouse1_MyoG_017.nd2	1028.58		-44.65	0
120	GFP lo_mouse1_MyoG_017.nd2	1338.07		264.84	264.84
121	GFP lo_mouse1_MyoG_017.nd2	1189.8		116.57	116.57
122	GFP lo_mouse1_MyoG_017.nd2	1119.17		45.94	45.94
123	GFP lo_mouse1_MyoG_017.nd2	1261.39		188.16	188.16
124	GFP lo_mouse1_MyoG_017.nd2	1165.57		92.34	92.34
125	GFP lo_mouse1_MyoG_017.nd2	1129.54		56.31	56.31
126	GFP lo_mouse1_MyoG_018.nd2	1476.7	1083.33	393.367	393.367
127	GFP lo_mouse1_MyoG_018.nd2	1261.28		177.947	177.947
128	GFP lo_mouse1_MyoG_018.nd2	1449.52		366.187	366.187
129	GFP lo_mouse1_MyoG_018.nd2	1254.34		171.007	171.007
130	GFP lo_mouse1_MyoG_018.nd2	1311.73		228.397	228.397
131	GFP lo_mouse1_MyoG_018.nd2	989.23		-94.103	0
132	GFP lo_mouse1_MyoG_018.nd2	1286.14		202.807	202.807
133	GFP lo_mouse1_MyoG_018.nd2	1125.49		42.157	42.157
134	GFP lo_mouse1_MyoG_018.nd2	1300.04		216.707	216.707
135	GFP lo_mouse1_MyoG_018.nd2	1112.28		28.947	28.947
136	GFP lo_mouse1_MyoG_018.nd2	1177.36		94.027	94.027
137	GFP lo_mouse1_MyoG_018.nd2	1186.73		103.397	103.397
138	GFP lo_mouse1_MyoG_018.nd2	1230.74		147.407	147.407
139	GFP lo_mouse1_MyoG_018.nd2	1100.06		16.727	16.727
140	GFP lo_mouse1_MyoG_018.nd2	1268.97		185.637	185.637
141	GFP lo_mouse1_MyoG_018.nd2	1274.06		190.727	190.727
142	GFP lo_mouse1_MyoG_018.nd2	991.7		-91.633	0
143	GFP lo_mouse1_MyoG_018.nd2	1076.83		-6.503	0
144	GFP lo_mouse1_MyoG_019.nd2	1659.25	1059.36	599.887	599.887
145	GFP lo_mouse1_MyoG_019.nd2	1416.32		356.957	356.957
146	GFP lo_mouse1_MyoG_019.nd2	1347.98		288.617	288.617
147	GFP lo_mouse1_MyoG_019.nd2	1433.98		374.617	374.617
148	GFP lo_mouse1_MyoG_019.nd2	1412.87		353.507	353.507
149	GFP lo_mouse1_MyoG_019.nd2	1434.26		374.897	374.897
150	GFP lo_mouse1_MyoG_019.nd2	1423.4		364.037	364.037
151	GFP lo_mouse1_MyoG_019.nd2	1332.41		273.047	273.047
152	GFP lo_mouse1_MyoG_019.nd2	1274.98		215.617	215.617
153	GFP lo_mouse1_MyoG_019.nd2	1220.9		161.537	161.537
154	GFP lo_mouse1_MyoG_019.nd2	1176.12		116.757	116.757
155	GFP lo_mouse1_MyoG_019.nd2	889.6		-169.763	0
156	GFP lo_mouse1_MyoG_019.nd2	1316.41		257.047	257.047
157	GFP lo_mouse1_MyoG_019.nd2	1455.09		395.727	395.727
158	GFP lo_mouse1_MyoG_019.nd2	1229.34		169.977	169.977
159	GFP lo_mouse1_MyoG_020.nd2	1413.94	1104.28	309.657	309.657
160	GFP lo_mouse1_MyoG_020.nd2	1477.21		372.927	372.927
161	GFP lo_mouse1_MyoG_020.nd2	1216		111.717	111.717
162	GFP lo_mouse1_MyoG_020.nd2	1351.54		247.257	247.257
163	GFP lo_mouse1_MyoG_020.nd2	1441.52		337.237	337.237
164	GFP lo_mouse1_MyoG_020.nd2	1125.42		21.137	21.137
165	GFP lo_mouse1_MyoG_020.nd2	1116.07		11.787	11.787
166	GFP lo_mouse1_MyoG_020.nd2	1369.41		265.127	265.127
167	GFP lo_mouse1_MyoG_020.nd2	1188.3		84.017	84.017
168	GFP lo_mouse1_MyoG_020.nd2	1197.29		93.007	93.007
169	GFP lo_mouse1_MyoG_020.nd2	1283.67		179.387	179.387
170	GFP lo_mouse1_MyoG_020.nd2	1120.28		15.997	15.997
171	GFP lo_mouse1_MyoG_020.nd2	1383.72		279.437	279.437
172	GFP lo_mouse1_MyoG_020.nd2	1488.79		384.507	384.507
173	GFP lo_mouse1_MyoG_020.nd2	1304.17		199.887	199.887
174	GFP lo_mouse1_MyoG_020.nd2	1283.85		179.567	179.567
175	GFP lo_mouse1_MyoG_020.nd2	1570.4		466.117	466.117
176	GFP lo_mouse1_MyoG_020.nd2	1046.09		-58.193	0
177	GFP lo_mouse1_MyoG_020.nd2	1203.87		99.587	99.587
178	GFP lo_mouse1_MyoG_020.nd2	1315.05		210.767	210.767
179	GFP lo_mouse1_MyoG_020.nd2	1148.45		44.167	44.167
180	GFP lo_mouse1_MyoG_020.nd2	965.69		-138.593	0
181	GFP lo_mouse1_MyoG_020.nd2	1034.9		-69.383	0
182	GFP lo_mouse1_MyoG_021.nd2	1248.61	1090.25	158.363	158.363
183	GFP lo_mouse1_MyoG_021.nd2	1277.82		187.573	187.573
184	GFP lo_mouse1_MyoG_021.nd2	1172.1		81.853	81.853
185	GFP lo_mouse1_MyoG_021.nd2	1236.44		146.193	146.193
186	GFP lo_mouse1_MyoG_021.nd2	1210.52		120.273	120.273
187	GFP lo_mouse1_MyoG_021.nd2	1164.33		74.083	74.083
188	GFP lo_mouse1_MyoG_021.nd2	1090.89		0.643	0.643
189	GFP lo_mouse1_MyoG_021.nd2	1310.47		220.223	220.223
190	GFP lo_mouse1_MyoG_021.nd2	1297.92		207.673	207.673
191	GFP lo_mouse1_MyoG_021.nd2	1332.06		241.813	241.813
192	GFP lo_mouse1_MyoG_021.nd2	1179.71		89.463	89.463
193	GFP lo_mouse1_MyoG_021.nd2	1308.56		218.313	218.313
194	GFP lo_mouse1_MyoG_021.nd2	1218.13		127.883	127.883
195	GFP lo_mouse1_MyoG_021.nd2	1127.33		37.083	37.083
196	GFP lo_mouse1_MyoG_021.nd2	1123.21		32.963	32.963
197	GFP lo_mouse1_MyoG_021.nd2	1271.78		181.533	181.533
198	GFP lo_mouse1_MyoG_021.nd2	1125.79		35.543	35.543
199	GFP lo_mouse1_MyoG_022.nd2	1472.32	1118.73	353.587	353.587
200	GFP lo_mouse1_MyoG_022.nd2	1323.81		205.077	205.077
201	GFP lo_mouse1_MyoG_022.nd2	1405.07		286.337	286.337
202	GFP lo_mouse1_MyoG_022.nd2	1250.67		131.937	131.937
203	GFP lo_mouse1_MyoG_022.nd2	1159.27		40.537	40.537
204	GFP lo_mouse1_MyoG_022.nd2	1085.42		-33.313	0
205	GFP lo_mouse1_MyoG_022.nd2	1164.46		45.727	45.727
206	GFP lo_mouse1_MyoG_022.nd2	1007.51		-111.223	0
207	GFP lo_mouse1_MyoG_022.nd2	1087.57		-31.163	0
208	GFP lo_mouse1_MyoG_022.nd2	1171.33		52.597	52.597
209	GFP lo_mouse1_MyoG_022.nd2	1099.91		-18.823	0
210	GFP lo_mouse1_MyoG_022.nd2	1079.82		-38.913	0
211	GFP lo_mouse1_MyoG_022.nd2	1419.64		300.907	300.907
212	GFP lo_mouse1_MyoG_022.nd2	1333.22		214.487	214.487
213	GFP lo_mouse1_MyoG_023.nd2	1299.26	1125.94	173.323	173.323
214	GFP lo_mouse1_MyoG_023.nd2	1127.5		1.563	1.563
215	GFP lo_mouse1_MyoG_023.nd2	1034.48		-91.457	0
216	GFP lo_mouse1_MyoG_023.nd2	1334.35		208.413	208.413
217	GFP lo_mouse1_MyoG_023.nd2	1239.54		113.603	113.603
218	GFP lo_mouse1_MyoG_023.nd2	1169.27		43.333	43.333
219	GFP lo_mouse1_MyoG_023.nd2	1192.69		66.753	66.753
220	GFP lo_mouse1_MyoG_023.nd2	1326.17		200.233	200.233
221	GFP lo_mouse1_MyoG_024.nd2	1540.72	1166.3	374.417	374.417
222	GFP lo_mouse1_MyoG_024.nd2	1440.82		274.517	274.517
223	GFP lo_mouse1_MyoG_024.nd2	1154.65		-11.653	0
224	GFP lo_mouse1_MyoG_024.nd2	1380.3		213.997	213.997
225	GFP lo_mouse1_MyoG_024.nd2	1304.24		137.937	137.937
226	GFP lo_mouse1_MyoG_024.nd2	1446.5		280.197	280.197
227	GFP lo_mouse1_MyoG_024.nd2	1261.94		95.637	95.637
228	GFP lo_mouse1_MyoG_024.nd2	1422.05		255.747	255.747
229	GFP lo_mouse1_MyoG_024.nd2	1596.9		430.597	430.597
230	GFP lo_mouse1_MyoG_024.nd2	1381.44		215.137	215.137
231	GFP lo_mouse1_MyoG_024.nd2	1237.01		70.707	70.707
232	GFP lo_mouse1_MyoG_024.nd2	1327.7		161.397	161.397
233	GFP lo_mouse1_MyoG_024.nd2	1252.02		85.717	85.717
234	GFP lo_mouse1_MyoG_024.nd2	1199.5		33.197	33.197
235	GFP lo_mouse1_MyoG_024.nd2	1192.89		26.587	26.587
236	GFP lo_mouse1_MyoG_024.nd2	1150.83		-15.473	0
237	GFP lo_mouse1_MyoG_024.nd2	1255.44		89.137	89.137
238	GFP lo_mouse1_MyoG_024.nd2	1227.16		60.857	60.857
239	GFP lo_mouse1_MyoG_024.nd2	1048.33		-117.973	0
240	GFP lo_mouse1_MyoG_025.nd2	1406.53	1093.21	313.317	313.317
241	GFP lo_mouse1_MyoG_025.nd2	1302.63		209.417	209.417
242	GFP lo_mouse1_MyoG_025.nd2	1109.69		16.477	16.477
243	GFP lo_mouse1_MyoG_025.nd2	973.32		-119.893	0
244	GFP lo_mouse1_MyoG_025.nd2	923.16		-170.053	0
245	GFP lo_mouse1_MyoG_025.nd2	1012.71		-80.503	0
246	GFP lo_mouse1_MyoG_025.nd2	1028.77		-64.443	0
247	GFP lo_mouse1_MyoG_025.nd2	1170.06		76.847	76.847
248	GFP lo_mouse1_MyoG_025.nd2	1044.46		-48.753	0
249	GFP lo_mouse1_MyoG_025.nd2	1165.87		72.657	72.657
250	GFP lo_mouse1_MyoG_025.nd2	1059.61		-33.603	0
251	GFP lo_mouse1_MyoG_025.nd2	1154.96		61.747	61.747
252	GFP lo_mouse1_MyoG_025.nd2	952.14		-141.073	0
253	GFP lo_mouse1_MyoG_025.nd2	1276.63		183.417	183.417
254	GFP lo_mouse1_MyoG_025.nd2	1219.98		126.767	126.767
255	GFP lo_mouse1_MyoG_025.nd2	1450.8		357.587	357.587
256	GFP lo_mouse1_MyoG_025.nd2	1288.28		195.067	195.067
257	GFP lo_mouse1_MyoG_025.nd2	1159.89		66.677	66.677
258	GFP lo_mouse1_MyoG_025.nd2	1210.11		116.897	116.897
259	GFP lo_mouse1_MyoG_025.nd2	1192.77		99.557	99.557
260	GFP lo_mouse1_MyoG_025.nd2	1350.88		257.667	257.667
261	GFP lo_mouse1_MyoG_026.nd2	1342.77	1087.51	255.257	255.257
262	GFP lo_mouse1_MyoG_026.nd2	1244.02		156.507	156.507
263	GFP lo_mouse1_MyoG_026.nd2	1321.75		234.237	234.237
264	GFP lo_mouse1_MyoG_026.nd2	985.29		-102.223	0
265	GFP lo_mouse1_MyoG_026.nd2	1196.64		109.127	109.127
266	GFP lo_mouse1_MyoG_026.nd2	1261.67		174.157	174.157
267	GFP lo_mouse1_MyoG_026.nd2	1281.98		194.467	194.467
268	GFP lo_mouse1_MyoG_026.nd2	1389.62		302.107	302.107
269	GFP lo_mouse1_MyoG_026.nd2	1198.69		111.177	111.177
270	GFP lo_mouse1_MyoG_026.nd2	1107.38		19.867	19.867
271	GFP lo_mouse1_MyoG_026.nd2	1142.74		55.227	55.227
272	GFP lo_mouse1_MyoG_026.nd2	1065.86		-21.653	0
273	GFP lo_mouse1_MyoG_026.nd2	1027.44		-60.073	0
274	GFP lo_mouse1_MyoG_026.nd2	1564.84		477.327	477.327
275	GFP lo_mouse1_MyoG_026.nd2	1318.68		231.167	231.167
276	GFP lo_mouse1_MyoG_026.nd2	1420.73		333.217	333.217
277	GFP lo_mouse1_MyoG_026.nd2	1154.12		66.607	66.607
278	GFP lo_mouse1_MyoG_026.nd2	1083.9		-3.613	0
279	GFP lo_mouse1_MyoG_026.nd2	1163.52		76.007	76.007
280	GFP lo_mouse1_MyoG_026.nd2	1379.48		291.967	291.967
281	GFP lo_mouse1_MyoG_026.nd2	1290.15		202.637	202.637
282	GFP lo_mouse1_MyoG_026.nd2	1397.72		310.207	310.207
283	GFP lo_mouse1_MyoG_026.nd2	1470.2		382.687	382.687
284	GFP lo_mouse1_MyoG_026.nd2	1260.16		172.647	172.647
285	GFP lo_mouse1_MyoG_026.nd2	743.4		-344.113	0
286	GFP lo_mouse1_MyoG_027.nd2	1264.28	1084.8	179.48	179.48
287	GFP lo_mouse1_MyoG_027.nd2	1134.27		49.47	49.47
288	GFP lo_mouse1_MyoG_027.nd2	1374.88		290.08	290.08
289	GFP lo_mouse1_MyoG_027.nd2	1277.85		193.05	193.05
290	GFP lo_mouse1_MyoG_027.nd2	1205.23		120.43	120.43
291	GFP lo_mouse1_MyoG_027.nd2	1351.97		267.17	267.17
292	GFP lo_mouse1_MyoG_027.nd2	1309.08		224.28	224.28
293	GFP lo_mouse1_MyoG_027.nd2	1337.03		252.23	252.23
294	GFP lo_mouse1_MyoG_027.nd2	1061.66		-23.14	0
295	GFP lo_mouse1_MyoG_027.nd2	1292.61		207.81	207.81
296	GFP lo_mouse1_MyoG_027.nd2	1370.46		285.66	285.66
297	GFP lo_mouse1_MyoG_027.nd2	1008.62		-76.18	0
298	GFP lo_mouse1_MyoG_027.nd2	1286.09		201.29	201.29
299	GFP lo_mouse1_MyoG_027.nd2	1236.68		151.88	151.88
300	GFP lo_mouse1_MyoG_027.nd2	1220.48		135.68	135.68
301	GFP lo_mouse1_MyoG_027.nd2	1173.61		88.81	88.81
302	GFP lo_mouse1_MyoG_027.nd2	1077.81		-6.99	0
303	GFP lo_mouse1_MyoG_027.nd2	1314.95		230.15	230.15
304	GFP lo_mouse1_MyoG_027.nd2	1106.05		21.25	21.25
305	GFP lo_mouse1_MyoG_027.nd2	1221.31		136.51	136.51
306	GFP lo_mouse1_MyoG_027.nd2	1257.63		172.83	172.83
307	GFP lo_mouse1_MyoG_027.nd2	1161.34		76.54	76.54
308	GFP lo_mouse1_MyoG_027.nd2	1102.84		18.04	18.04
309	GFP lo_mouse1_MyoG_027.nd2	1114.43		29.63	29.63
310	GFP lo_mouse1_MyoG_027.nd2	1307.53		222.73	222.73

## Sheet: Hi GFP_mouse2
Item	Source	MyoG (TxRed) mean intensity	TxRed background	MyoG mean intensity	Corrected minus to zeros
1	GFP hi_mouse2_MyoG_029.nd2	1363.84	1162.27	201.573	201.573
2	GFP hi_mouse2_MyoG_029.nd2	1294.49		132.223	132.223
3	GFP hi_mouse2_MyoG_029.nd2	1168.56		6.293	6.293
4	GFP hi_mouse2_MyoG_029.nd2	1202.96		40.693	40.693
5	GFP hi_mouse2_MyoG_029.nd2	1318.74		156.473	156.473
6	GFP hi_mouse2_MyoG_029.nd2	1341.87		179.603	179.603
7	GFP hi_mouse2_MyoG_029.nd2	1225.71		63.443	63.443
8	GFP hi_mouse2_MyoG_029.nd2	1430.84		268.573	268.573
9	GFP hi_mouse2_MyoG_029.nd2	1146.62		-15.647	0
10	GFP hi_mouse2_MyoG_029.nd2	1152.56		-9.707	0
11	GFP hi_mouse2_MyoG_029.nd2	1097.38		-64.887	0
12	GFP hi_mouse2_MyoG_029.nd2	1137.09		-25.177	0
13	GFP hi_mouse2_MyoG_029.nd2	1147.9		-14.367	0
14	GFP hi_mouse2_MyoG_030.nd2	1208.32	1091.29	117.033	117.033
15	GFP hi_mouse2_MyoG_030.nd2	1113.72		22.433	22.433
16	GFP hi_mouse2_MyoG_030.nd2	1277.43		186.143	186.143
17	GFP hi_mouse2_MyoG_030.nd2	1382.82		291.533	291.533
18	GFP hi_mouse2_MyoG_030.nd2	1269.05		177.763	177.763
19	GFP hi_mouse2_MyoG_030.nd2	1052.24		-39.047	0
20	GFP hi_mouse2_MyoG_030.nd2	1126.74		35.453	35.453
21	GFP hi_mouse2_MyoG_030.nd2	1164.02		72.733	72.733
22	GFP hi_mouse2_MyoG_030.nd2	972.73		-118.557	0
23	GFP hi_mouse2_MyoG_031.nd2	1341.66	1202.49	139.173	139.173
24	GFP hi_mouse2_MyoG_031.nd2	1070.8		-131.687	0
25	GFP hi_mouse2_MyoG_031.nd2	1195		-7.48667	0
26	GFP hi_mouse2_MyoG_031.nd2	1155.23		-47.2567	0
27	GFP hi_mouse2_MyoG_031.nd2	1276.99		74.5033	74.5033
28	GFP hi_mouse2_MyoG_031.nd2	1172.86		-29.6267	0
29	GFP hi_mouse2_MyoG_031.nd2	1265.96		63.4733	63.4733
30	GFP hi_mouse2_MyoG_031.nd2	1362.63		160.143	160.143
31	GFP hi_mouse2_MyoG_031.nd2	1275.63		73.1433	73.1433
32	GFP hi_mouse2_MyoG_031.nd2	1300.52		98.0333	98.0333
33	GFP hi_mouse2_MyoG_031.nd2	1064.19		-138.297	0
34	GFP hi_mouse2_MyoG_031.nd2	1171.41		-31.0767	0
35	GFP hi_mouse2_MyoG_031.nd2	1080.93		-121.557	0
36	GFP hi_mouse2_MyoG_031.nd2	1026.52		-175.967	0
37	GFP hi_mouse2_MyoG_031.nd2	1084.22		-118.267	0
38	GFP hi_mouse2_MyoG_031.nd2	920.03		-282.457	0
39	GFP hi_mouse2_MyoG_031.nd2	779.11		-423.377	0
40	GFP hi_mouse2_MyoG_031.nd2	985.87		-216.617	0
41	GFP hi_mouse2_MyoG_032.nd2	1428.34	1188.3	240.04	240.04
42	GFP hi_mouse2_MyoG_032.nd2	1498.95		310.65	310.65
43	GFP hi_mouse2_MyoG_032.nd2	1376.96		188.66	188.66
44	GFP hi_mouse2_MyoG_032.nd2	1271.08		82.78	82.78
45	GFP hi_mouse2_MyoG_032.nd2	1280.92		92.62	92.62
46	GFP hi_mouse2_MyoG_032.nd2	1350.2		161.9	161.9
47	GFP hi_mouse2_MyoG_032.nd2	1240.87		52.57	52.57
48	GFP hi_mouse2_MyoG_032.nd2	1309.8		121.5	121.5
49	GFP hi_mouse2_MyoG_032.nd2	1255.31		67.01	67.01
50	GFP hi_mouse2_MyoG_032.nd2	1335.94		147.64	147.64
51	GFP hi_mouse2_MyoG_032.nd2	1357.73		169.43	169.43
52	GFP hi_mouse2_MyoG_032.nd2	1486.52		298.22	298.22
53	GFP hi_mouse2_MyoG_032.nd2	1179.97		-8.33	0
54	GFP hi_mouse2_MyoG_032.nd2	1269.95		81.65	81.65
55	GFP hi_mouse2_MyoG_032.nd2	1268.14		79.84	79.84
56	GFP hi_mouse2_MyoG_032.nd2	1206.58		18.28	18.28
57	GFP hi_mouse2_MyoG_032.nd2	1261.37		73.07	73.07
58	GFP hi_mouse2_MyoG_032.nd2	1277.77		89.47	89.47
59	GFP hi_mouse2_MyoG_032.nd2	1126.35		-61.95	0
60	GFP hi_mouse2_MyoG_032.nd2	1197.58		9.28	9.28
61	GFP hi_mouse2_MyoG_032.nd2	1215.36		27.06	27.06
62	GFP hi_mouse2_MyoG_032.nd2	1123.42		-64.88	0
63	GFP hi_mouse2_MyoG_032.nd2	1220.12		31.82	31.82
64	GFP hi_mouse2_MyoG_033.nd2	1400.66	1216.38	184.277	184.277
65	GFP hi_mouse2_MyoG_033.nd2	1444.88		228.497	228.497
66	GFP hi_mouse2_MyoG_033.nd2	1244.06		27.6767	27.6767
67	GFP hi_mouse2_MyoG_033.nd2	1361.57		145.187	145.187
68	GFP hi_mouse2_MyoG_033.nd2	1278.51		62.1267	62.1267
69	GFP hi_mouse2_MyoG_033.nd2	1429.86		213.477	213.477
70	GFP hi_mouse2_MyoG_033.nd2	1305.49		89.1067	89.1067
71	GFP hi_mouse2_MyoG_033.nd2	1205.86		-10.5233	0
72	GFP hi_mouse2_MyoG_033.nd2	1266.21		49.8267	49.8267
73	GFP hi_mouse2_MyoG_034.nd2	1481.13	1236.48	244.653	244.653
74	GFP hi_mouse2_MyoG_034.nd2	1390.4		153.923	153.923
75	GFP hi_mouse2_MyoG_034.nd2	1279.78		43.3033	43.3033
76	GFP hi_mouse2_MyoG_035.nd2	1543.75	1400.65	143.097	143.097
77	GFP hi_mouse2_MyoG_035.nd2	1389.98		-10.6733	0
78	GFP hi_mouse2_MyoG_035.nd2	1268.23		-132.423	0
79	GFP hi_mouse2_MyoG_035.nd2	1290.23		-110.423	0
80	GFP hi_mouse2_MyoG_035.nd2	1409.26		8.60667	8.60667
81	GFP hi_mouse2_MyoG_035.nd2	1127.94		-272.713	0
82	GFP hi_mouse2_MyoG_035.nd2	1284.89		-115.763	0
83	GFP hi_mouse2_MyoG_035.nd2	1372.19		-28.4633	0
84	GFP hi_mouse2_MyoG_035.nd2	1229.44		-171.213	0
85	GFP hi_mouse2_MyoG_035.nd2	1366.25		-34.4033	0
86	GFP hi_mouse2_MyoG_036.nd2	1449.45	1240.53	208.92	208.92
87	GFP hi_mouse2_MyoG_036.nd2	1402.68		162.15	162.15
88	GFP hi_mouse2_MyoG_036.nd2	1389.4		148.87	148.87
89	GFP hi_mouse2_MyoG_036.nd2	1328.44		87.91	87.91
90	GFP hi_mouse2_MyoG_036.nd2	1308.88		68.35	68.35
91	GFP hi_mouse2_MyoG_036.nd2	1315.35		74.82	74.82
92	GFP hi_mouse2_MyoG_036.nd2	1268.12		27.59	27.59
93	GFP hi_mouse2_MyoG_036.nd2	1267.38		26.85	26.85
94	GFP hi_mouse2_MyoG_036.nd2	1315.67		75.14	75.14
95	GFP hi_mouse2_MyoG_036.nd2	1260.48		19.95	19.95
96	GFP hi_mouse2_MyoG_036.nd2	1210.49		-30.04	0
97	GFP hi_mouse2_MyoG_036.nd2	1265.57		25.04	25.04
98	GFP hi_mouse2_MyoG_036.nd2	1347.28		106.75	106.75
99	GFP hi_mouse2_MyoG_036.nd2	1373.44		132.91	132.91
100	GFP hi_mouse2_MyoG_036.nd2	1468.5		227.97	227.97
101	GFP hi_mouse2_MyoG_036.nd2	1401.4		160.87	160.87
102	GFP hi_mouse2_MyoG_036.nd2	1424.39		183.86	183.86
103	GFP hi_mouse2_MyoG_036.nd2	1094.23		-146.3	0
104	GFP hi_mouse2_MyoG_036.nd2	1001.18		-239.35	0
105	GFP hi_mouse2_MyoG_037.nd2	1360.95	1207.9	153.053	153.053
106	GFP hi_mouse2_MyoG_037.nd2	1314.92		107.023	107.023
107	GFP hi_mouse2_MyoG_037.nd2	1417.28		209.383	209.383
108	GFP hi_mouse2_MyoG_037.nd2	1345.9		138.003	138.003
109	GFP hi_mouse2_MyoG_037.nd2	1347.82		139.923	139.923
110	GFP hi_mouse2_MyoG_037.nd2	1321.89		113.993	113.993
111	GFP hi_mouse2_MyoG_037.nd2	1345.16		137.263	137.263
112	GFP hi_mouse2_MyoG_037.nd2	1311.51		103.613	103.613
113	GFP hi_mouse2_MyoG_037.nd2	1260.62		52.7233	52.7233
114	GFP hi_mouse2_MyoG_037.nd2	1214.11		6.21333	6.21333
115	GFP hi_mouse2_MyoG_037.nd2	1238.84		30.9433	30.9433
116	GFP hi_mouse2_MyoG_037.nd2	1296.31		88.4133	88.4133
117	GFP hi_mouse2_MyoG_037.nd2	1232.57		24.6733	24.6733
118	GFP hi_mouse2_MyoG_037.nd2	1259		51.1033	51.1033
119	GFP hi_mouse2_MyoG_037.nd2	1349.31		141.413	141.413
120	GFP hi_mouse2_MyoG_037.nd2	1351.54		143.643	143.643
121	GFP hi_mouse2_MyoG_037.nd2	1360.85		152.953	152.953
122	GFP hi_mouse2_MyoG_037.nd2	1222.73		14.8333	14.8333
123	GFP hi_mouse2_MyoG_037.nd2	1189.98		-17.9167	0
124	GFP hi_mouse2_MyoG_037.nd2	1236.41		28.5133	28.5133
125	GFP hi_mouse2_MyoG_037.nd2	1065.01		-142.887	0
126	GFP hi_mouse2_MyoG_037.nd2	1059.31		-148.587	0
127	GFP hi_mouse2_MyoG_037.nd2	930.14		-277.757	0
128	GFP hi_mouse2_MyoG_038.nd2	1354.91	1202.81	152.103	152.103
129	GFP hi_mouse2_MyoG_038.nd2	1256.62		53.8133	53.8133
130	GFP hi_mouse2_MyoG_038.nd2	1320.61		117.803	117.803
131	GFP hi_mouse2_MyoG_038.nd2	1102.38		-100.427	0
132	GFP hi_mouse2_MyoG_038.nd2	1356.95		154.143	154.143
133	GFP hi_mouse2_MyoG_038.nd2	1258.19		55.3833	55.3833
134	GFP hi_mouse2_MyoG_038.nd2	1280.05		77.2433	77.2433
135	GFP hi_mouse2_MyoG_038.nd2	1146.57		-56.2367	0
136	GFP hi_mouse2_MyoG_038.nd2	1344.77		141.963	141.963
137	GFP hi_mouse2_MyoG_038.nd2	1282.11		79.3033	79.3033
138	GFP hi_mouse2_MyoG_039.nd2	1382.66	1184.88	197.777	197.777
139	GFP hi_mouse2_MyoG_039.nd2	1473.31		288.427	288.427
140	GFP hi_mouse2_MyoG_039.nd2	1348.69		163.807	163.807
141	GFP hi_mouse2_MyoG_039.nd2	1367		182.117	182.117
142	GFP hi_mouse2_MyoG_039.nd2	1291.15		106.267	106.267
143	GFP hi_mouse2_MyoG_039.nd2	1383.6		198.717	198.717
144	GFP hi_mouse2_MyoG_039.nd2	1252.82		67.9367	67.9367
145	GFP hi_mouse2_MyoG_039.nd2	1325.19		140.307	140.307
146	GFP hi_mouse2_MyoG_039.nd2	1293.73		108.847	108.847
147	GFP hi_mouse2_MyoG_039.nd2	1220.64		35.7567	35.7567
148	GFP hi_mouse2_MyoG_039.nd2	1345.77		160.887	160.887
149	GFP hi_mouse2_MyoG_039.nd2	1320.54		135.657	135.657
150	GFP hi_mouse2_MyoG_039.nd2	1243.83		58.9467	58.9467
151	GFP hi_mouse2_MyoG_039.nd2	1222.73		37.8467	37.8467
152	GFP hi_mouse2_MyoG_039.nd2	1223.24		38.3567	38.3567
153	GFP hi_mouse2_MyoG_039.nd2	1133.46		-51.4233	0
154	GFP hi_mouse2_MyoG_039.nd2	1283.36		98.4767	98.4767
155	GFP hi_mouse2_MyoG_039.nd2	1259.56		74.6767	74.6767
156	GFP hi_mouse2_MyoG_040.nd2	1427.01	1210.68	216.327	216.327
157	GFP hi_mouse2_MyoG_040.nd2	1425.65		214.967	214.967
158	GFP hi_mouse2_MyoG_040.nd2	1514.29		303.607	303.607
159	GFP hi_mouse2_MyoG_040.nd2	1419.43		208.747	208.747
160	GFP hi_mouse2_MyoG_040.nd2	1360.39		149.707	149.707
161	GFP hi_mouse2_MyoG_040.nd2	1173.38		-37.3033	0
162	GFP hi_mouse2_MyoG_040.nd2	1240.16		29.4767	29.4767
163	GFP hi_mouse2_MyoG_040.nd2	1318.8		108.117	108.117
164	GFP hi_mouse2_MyoG_040.nd2	1109.62		-101.063	0
165	GFP hi_mouse2_MyoG_040.nd2	1245.73		35.0467	35.0467
166	GFP hi_mouse2_MyoG_040.nd2	1337.95		127.267	127.267
167	GFP hi_mouse2_MyoG_040.nd2	1292.11		81.4267	81.4267
168	GFP hi_mouse2_MyoG_040.nd2	1285.24		74.5567	74.5567
169	GFP hi_mouse2_MyoG_040.nd2	1137.68		-73.0033	0
170	GFP hi_mouse2_MyoG_040.nd2	1270.4		59.7167	59.7167
171	GFP hi_mouse2_MyoG_041.nd2	1381.82	1214.53	167.29	167.29
172	GFP hi_mouse2_MyoG_041.nd2	1455.17		240.64	240.64
173	GFP hi_mouse2_MyoG_041.nd2	1364.68		150.15	150.15
174	GFP hi_mouse2_MyoG_041.nd2	1346.18		131.65	131.65
175	GFP hi_mouse2_MyoG_041.nd2	1224.64		10.11	10.11
176	GFP hi_mouse2_MyoG_041.nd2	1247.53		33	33
177	GFP hi_mouse2_MyoG_041.nd2	1264.73		50.2	50.2
178	GFP hi_mouse2_MyoG_041.nd2	1307.45		92.92	92.92
179	GFP hi_mouse2_MyoG_041.nd2	1260.3		45.77	45.77
180	GFP hi_mouse2_MyoG_041.nd2	1138.56		-75.97	0
181	GFP hi_mouse2_MyoG_041.nd2	1118.29		-96.24	0
182	GFP hi_mouse2_MyoG_041.nd2	1282.96		68.43	68.43
183	GFP hi_mouse2_MyoG_041.nd2	1157.88		-56.65	0
184	GFP hi_mouse2_MyoG_041.nd2	1186.34		-28.19	0
185	GFP hi_mouse2_MyoG_041.nd2	1100.32		-114.21	0
186	GFP hi_mouse2_MyoG_041.nd2	1187.01		-27.52	0
187	GFP hi_mouse2_MyoG_042.nd2	1418.06	1233.44	184.62	184.62
188	GFP hi_mouse2_MyoG_042.nd2	1423.65		190.21	190.21
189	GFP hi_mouse2_MyoG_042.nd2	1430.74		197.3	197.3
190	GFP hi_mouse2_MyoG_042.nd2	1524.39		290.95	290.95
191	GFP hi_mouse2_MyoG_042.nd2	1370.67		137.23	137.23
192	GFP hi_mouse2_MyoG_042.nd2	1357.99		124.55	124.55
193	GFP hi_mouse2_MyoG_042.nd2	1458.49		225.05	225.05
194	GFP hi_mouse2_MyoG_042.nd2	1485.97		252.53	252.53
195	GFP hi_mouse2_MyoG_042.nd2	1271.96		38.52	38.52
196	GFP hi_mouse2_MyoG_042.nd2	1317.21		83.77	83.77
197	GFP hi_mouse2_MyoG_042.nd2	1378.04		144.6	144.6
198	GFP hi_mouse2_MyoG_042.nd2	1267.22		33.78	33.78
199	GFP hi_mouse2_MyoG_042.nd2	1253.37		19.93	19.93
200	GFP hi_mouse2_MyoG_042.nd2	1174.58		-58.86	0
201	GFP hi_mouse2_MyoG_042.nd2	1223.66		-9.78	0
202	GFP hi_mouse2_MyoG_042.nd2	1504.87		271.43	271.43
203	GFP hi_mouse2_MyoG_042.nd2	1454.12		220.68	220.68
204	GFP hi_mouse2_MyoG_043.nd2	1363.91	1229.08	134.83	134.83
205	GFP hi_mouse2_MyoG_043.nd2	1310.48		81.4	81.4
206	GFP hi_mouse2_MyoG_043.nd2	1277.26		48.18	48.18
207	GFP hi_mouse2_MyoG_043.nd2	1266.24		37.16	37.16
208	GFP hi_mouse2_MyoG_043.nd2	1212.15		-16.93	0
209	GFP hi_mouse2_MyoG_043.nd2	1219.56		-9.52	0
210	GFP hi_mouse2_MyoG_044.nd2	1403.76	1278.81	124.947	124.947
211	GFP hi_mouse2_MyoG_044.nd2	1338.79		59.9767	59.9767
212	GFP hi_mouse2_MyoG_044.nd2	1316.04		37.2267	37.2267
213	GFP hi_mouse2_MyoG_044.nd2	1244.71		-34.1033	0
214	GFP hi_mouse2_MyoG_044.nd2	1191.64		-87.1733	0
215	GFP hi_mouse2_MyoG_045.nd2	1236.71	1168.16	68.5467	68.5467
216	GFP hi_mouse2_MyoG_045.nd2	1242.36		74.1967	74.1967
217	GFP hi_mouse2_MyoG_045.nd2	1173.69		5.52667	5.52667
218	GFP hi_mouse2_MyoG_045.nd2	1145.52		-22.6433	0
219	GFP hi_mouse2_MyoG_045.nd2	1284.49		116.327	116.327
220	GFP hi_mouse2_MyoG_045.nd2	1211.23		43.0667	43.0667
221	GFP hi_mouse2_MyoG_045.nd2	1195.87		27.7067	27.7067
222	GFP hi_mouse2_MyoG_045.nd2	1235.55		67.3867	67.3867
223	GFP hi_mouse2_MyoG_045.nd2	1156.37		-11.7933	0
224	GFP hi_mouse2_MyoG_045.nd2	1223.97		55.8067	55.8067
225	GFP hi_mouse2_MyoG_045.nd2	1276.07		107.907	107.907
226	GFP hi_mouse2_MyoG_045.nd2	1101.12		-67.0433	0
227	GFP hi_mouse2_MyoG_045.nd2	1068.58		-99.5833	0
228	GFP hi_mouse2_MyoG_045.nd2	1008.19		-159.973	0
229	GFP hi_mouse2_MyoG_046.nd2	1409.23	1200.68	208.547	208.547
230	GFP hi_mouse2_MyoG_046.nd2	1442.19		241.507	241.507
231	GFP hi_mouse2_MyoG_046.nd2	1375.03		174.347	174.347
232	GFP hi_mouse2_MyoG_046.nd2	1484.39		283.707	283.707
233	GFP hi_mouse2_MyoG_046.nd2	1363.34		162.657	162.657
234	GFP hi_mouse2_MyoG_046.nd2	1280.36		79.6767	79.6767
235	GFP hi_mouse2_MyoG_046.nd2	1227.37		26.6867	26.6867
236	GFP hi_mouse2_MyoG_046.nd2	1301.1		100.417	100.417
237	GFP hi_mouse2_MyoG_046.nd2	1273.46		72.7767	72.7767
238	GFP hi_mouse2_MyoG_046.nd2	1179.89		-20.7933	0
239	GFP hi_mouse2_MyoG_046.nd2	1325.63		124.947	124.947
240	GFP hi_mouse2_MyoG_046.nd2	1444.64		243.957	243.957
241	GFP hi_mouse2_MyoG_046.nd2	1348.82		148.137	148.137
242	GFP hi_mouse2_MyoG_046.nd2	1278.34		77.6567	77.6567
243	GFP hi_mouse2_MyoG_046.nd2	1251.57		50.8867	50.8867
244	GFP hi_mouse2_MyoG_046.nd2	1193.76		-6.92333	0
245	GFP hi_mouse2_MyoG_046.nd2	1300.5		99.8167	99.8167
246	GFP hi_mouse2_MyoG_047.nd2	1378.18	1217.18	161.003	161.003
247	GFP hi_mouse2_MyoG_047.nd2	1336.83		119.653	119.653
248	GFP hi_mouse2_MyoG_047.nd2	1331.22		114.043	114.043
249	GFP hi_mouse2_MyoG_047.nd2	1331.79		114.613	114.613
250	GFP hi_mouse2_MyoG_047.nd2	1355.62		138.443	138.443
251	GFP hi_mouse2_MyoG_047.nd2	1275.99		58.8133	58.8133
252	GFP hi_mouse2_MyoG_047.nd2	1271.91		54.7333	54.7333
253	GFP hi_mouse2_MyoG_047.nd2	1248.83		31.6533	31.6533
254	GFP hi_mouse2_MyoG_047.nd2	1269.11		51.9333	51.9333
255	GFP hi_mouse2_MyoG_047.nd2	1078.28		-138.897	0
256	GFP hi_mouse2_MyoG_047.nd2	1105.63		-111.547	0
257	GFP hi_mouse2_MyoG_047.nd2	1268.46		51.2833	51.2833
258	GFP hi_mouse2_MyoG_047.nd2	1245.2		28.0233	28.0233
259	GFP hi_mouse2_MyoG_047.nd2	1242.27		25.0933	25.0933
260	GFP hi_mouse2_MyoG_047.nd2	1357.56		140.383	140.383
261	GFP hi_mouse2_MyoG_047.nd2	1327.72		110.543	110.543
262	GFP hi_mouse2_MyoG_047.nd2	1268.12		50.9433	50.9433
263	GFP hi_mouse2_MyoG_047.nd2	1276.64		59.4633	59.4633
264	GFP hi_mouse2_MyoG_048.nd2	1429.68	1222.01	207.673	207.673
265	GFP hi_mouse2_MyoG_048.nd2	1192.55		-29.4567	0
266	GFP hi_mouse2_MyoG_048.nd2	1223.68		1.67333	1.67333
267	GFP hi_mouse2_MyoG_048.nd2	1184.37		-37.6367	0
268	GFP hi_mouse2_MyoG_048.nd2	1402.01		180.003	180.003
269	GFP hi_mouse2_MyoG_048.nd2	1377.66		155.653	155.653
270	GFP hi_mouse2_MyoG_048.nd2	1244.64		22.6333	22.6333
271	GFP hi_mouse2_MyoG_048.nd2	1229.4		7.39333	7.39333
272	GFP hi_mouse2_MyoG_048.nd2	1220.22		-1.78667	0
273	GFP hi_mouse2_MyoG_048.nd2	1292.41		70.4033	70.4033
274	GFP hi_mouse2_MyoG_048.nd2	1344.12		122.113	122.113
275	GFP hi_mouse2_MyoG_048.nd2	1316		93.9933	93.9933
276	GFP hi_mouse2_MyoG_048.nd2	1276.77		54.7633	54.7633
277	GFP hi_mouse2_MyoG_048.nd2	1207.98		-14.0267	0
278	GFP hi_mouse2_MyoG_048.nd2	1138.18		-83.8267	0
279	GFP hi_mouse2_MyoG_049.nd2	1562.86	1193.71	369.153	369.153
280	GFP hi_mouse2_MyoG_049.nd2	1381.9		188.193	188.193
281	GFP hi_mouse2_MyoG_049.nd2	1419.14		225.433	225.433
282	GFP hi_mouse2_MyoG_049.nd2	1248.1		54.3933	54.3933
283	GFP hi_mouse2_MyoG_049.nd2	1256.44		62.7333	62.7333
284	GFP hi_mouse2_MyoG_049.nd2	1225.24		31.5333	31.5333
285	GFP hi_mouse2_MyoG_049.nd2	1212.35		18.6433	18.6433
286	GFP hi_mouse2_MyoG_049.nd2	1259.76		66.0533	66.0533
287	GFP hi_mouse2_MyoG_049.nd2	1233.66		39.9533	39.9533
288	GFP hi_mouse2_MyoG_049.nd2	1197.35		3.64333	3.64333
289	GFP hi_mouse2_MyoG_049.nd2	1165.97		-27.7367	0
290	GFP hi_mouse2_MyoG_049.nd2	1263.27		69.5633	69.5633
291	GFP hi_mouse2_MyoG_049.nd2	1091.46		-102.247	0
292	GFP hi_mouse2_MyoG_050.nd2	1423.58	1223.25	200.33	200.33
293	GFP hi_mouse2_MyoG_050.nd2	1408.38		185.13	185.13
294	GFP hi_mouse2_MyoG_050.nd2	1431.38		208.13	208.13
295	GFP hi_mouse2_MyoG_050.nd2	1377.22		153.97	153.97
296	GFP hi_mouse2_MyoG_050.nd2	1200.88		-22.37	0
297	GFP hi_mouse2_MyoG_050.nd2	1208.32		-14.93	0
298	GFP hi_mouse2_MyoG_050.nd2	1239.88		16.63	16.63
299	GFP hi_mouse2_MyoG_050.nd2	1186.48		-36.77	0
300	GFP hi_mouse2_MyoG_050.nd2	1207.93		-15.32	0
301	GFP hi_mouse2_MyoG_050.nd2	1090.5		-132.75	0
302	GFP hi_mouse2_MyoG_050.nd2	1306.04		82.79	82.79
303	GFP hi_mouse2_MyoG_050.nd2	1263.31		40.06	40.06
304	GFP hi_mouse2_MyoG_050.nd2	1435.68		212.43	212.43

## Sheet: Med GFP_mouse2
Item	Source	MyoG (TxRed) mean intensity	TxRed background	MyoG mean intensity	Corrected minus to zeros
1	GFP med_mouse2_MyoG_020.nd2	1364.44	1168.21	196.233	196.233
2	GFP med_mouse2_MyoG_020.nd2	1256.08		87.8733	87.8733
3	GFP med_mouse2_MyoG_020.nd2	1317.88		149.673	149.673
4	GFP med_mouse2_MyoG_020.nd2	1326.58		158.373	158.373
5	GFP med_mouse2_MyoG_020.nd2	1350.11		181.903	181.903
6	GFP med_mouse2_MyoG_020.nd2	1447.05		278.843	278.843
7	GFP med_mouse2_MyoG_020.nd2	1360.37		192.163	192.163
8	GFP med_mouse2_MyoG_020.nd2	1206.18		37.9733	37.9733
9	GFP med_mouse2_MyoG_020.nd2	1214.34		46.1333	46.1333
10	GFP med_mouse2_MyoG_020.nd2	1106.85		-61.3567	0
11	GFP med_mouse2_MyoG_020.nd2	1313.29		145.083	145.083
12	GFP med_mouse2_MyoG_020.nd2	1409.5		241.293	241.293
13	GFP med_mouse2_MyoG_020.nd2	1244.08		75.8733	75.8733
14	GFP med_mouse2_MyoG_020.nd2	1255.5		87.2933	87.2933
15	GFP med_mouse2_MyoG_020.nd2	1178.3		10.0933	10.0933
16	GFP med_mouse2_MyoG_020.nd2	1164.54		-3.66667	0
17	GFP med_mouse2_MyoG_021.nd2	1361.86	1118.2	243.657	243.657
18	GFP med_mouse2_MyoG_021.nd2	1303.9		185.697	185.697
19	GFP med_mouse2_MyoG_021.nd2	1461.36		343.157	343.157
20	GFP med_mouse2_MyoG_021.nd2	1699.46		581.257	581.257
21	GFP med_mouse2_MyoG_021.nd2	1194.31		76.1067	76.1067
22	GFP med_mouse2_MyoG_021.nd2	1262.84		144.637	144.637
23	GFP med_mouse2_MyoG_021.nd2	1251.86		133.657	133.657
24	GFP med_mouse2_MyoG_021.nd2	1367.66		249.457	249.457
25	GFP med_mouse2_MyoG_021.nd2	1334.46		216.257	216.257
26	GFP med_mouse2_MyoG_021.nd2	1234.09		115.887	115.887
27	GFP med_mouse2_MyoG_021.nd2	1132.48		14.2767	14.2767
28	GFP med_mouse2_MyoG_021.nd2	1248		129.797	129.797
29	GFP med_mouse2_MyoG_021.nd2	1170.05		51.8467	51.8467
30	GFP med_mouse2_MyoG_021.nd2	1174.34		56.1367	56.1367
31	GFP med_mouse2_MyoG_021.nd2	1060.96		-57.2433	0
32	GFP med_mouse2_MyoG_022.nd2	1259.45	1148.78	110.673	110.673
33	GFP med_mouse2_MyoG_022.nd2	1207.8		59.0233	59.0233
34	GFP med_mouse2_MyoG_022.nd2	1213.51		64.7333	64.7333
35	GFP med_mouse2_MyoG_022.nd2	1261.47		112.693	112.693
36	GFP med_mouse2_MyoG_022.nd2	1493.9		345.123	345.123
37	GFP med_mouse2_MyoG_022.nd2	1388.6		239.823	239.823
38	GFP med_mouse2_MyoG_022.nd2	1141.7		-7.07667	0
39	GFP med_mouse2_MyoG_022.nd2	1193.92		45.1433	45.1433
40	GFP med_mouse2_MyoG_022.nd2	1218.31		69.5333	69.5333
41	GFP med_mouse2_MyoG_022.nd2	1218.44		69.6633	69.6633
42	GFP med_mouse2_MyoG_022.nd2	1291.54		142.763	142.763
43	GFP med_mouse2_MyoG_023.nd2	1378.35	1132.08	246.273	246.273
44	GFP med_mouse2_MyoG_023.nd2	1258.26		126.183	126.183
45	GFP med_mouse2_MyoG_023.nd2	1274.4		142.323	142.323
46	GFP med_mouse2_MyoG_023.nd2	1207.36		75.2833	75.2833
47	GFP med_mouse2_MyoG_023.nd2	1268.92		136.843	136.843
48	GFP med_mouse2_MyoG_023.nd2	1118.14		-13.9367	0
49	GFP med_mouse2_MyoG_023.nd2	1046.2		-85.8767	0
50	GFP med_mouse2_MyoG_023.nd2	1316.08		184.003	184.003
51	GFP med_mouse2_MyoG_023.nd2	1388.91		256.833	256.833
52	GFP med_mouse2_MyoG_023.nd2	1268.78		136.703	136.703
53	GFP med_mouse2_MyoG_023.nd2	1219.53		87.4533	87.4533
54	GFP med_mouse2_MyoG_023.nd2	1215.82		83.7433	83.7433
55	GFP med_mouse2_MyoG_023.nd2	1203.79		71.7133	71.7133
56	GFP med_mouse2_MyoG_023.nd2	1179.56		47.4833	47.4833
57	GFP med_mouse2_MyoG_023.nd2	1106.46		-25.6167	0
58	GFP med_mouse2_MyoG_024.nd2	1394.26	1200.06	194.203	194.203
59	GFP med_mouse2_MyoG_024.nd2	1229.56		29.5033	29.5033
60	GFP med_mouse2_MyoG_024.nd2	1219.62		19.5633	19.5633
61	GFP med_mouse2_MyoG_024.nd2	942.53		-257.527	0
62	GFP med_mouse2_MyoG_024.nd2	1167.67		-32.3867	0
63	GFP med_mouse2_MyoG_024.nd2	1277.96		77.9033	77.9033
64	GFP med_mouse2_MyoG_024.nd2	1253.2		53.1433	53.1433
65	GFP med_mouse2_MyoG_024.nd2	1200.01		-0.0466667	0
66	GFP med_mouse2_MyoG_025.nd2	1355.78	1185.77	170.013	170.013
67	GFP med_mouse2_MyoG_025.nd2	1387.08		201.313	201.313
68	GFP med_mouse2_MyoG_025.nd2	1109.23		-76.5367	0
69	GFP med_mouse2_MyoG_025.nd2	1265.46		79.6933	79.6933
70	GFP med_mouse2_MyoG_025.nd2	1358.67		172.903	172.903
71	GFP med_mouse2_MyoG_025.nd2	1252.12		66.3533	66.3533
72	GFP med_mouse2_MyoG_025.nd2	1367.05		181.283	181.283
73	GFP med_mouse2_MyoG_025.nd2	1067.45		-118.317	0
74	GFP med_mouse2_MyoG_025.nd2	1185.19		-0.576667	0
75	GFP med_mouse2_MyoG_026.nd2	1421.73	1228.83	192.897	192.897
76	GFP med_mouse2_MyoG_026.nd2	1570.87		342.037	342.037
77	GFP med_mouse2_MyoG_026.nd2	1418.86		190.027	190.027
78	GFP med_mouse2_MyoG_026.nd2	1211.44		-17.3933	0
79	GFP med_mouse2_MyoG_026.nd2	1439.5		210.667	210.667
80	GFP med_mouse2_MyoG_026.nd2	1147.08		-81.7533	0
81	GFP med_mouse2_MyoG_026.nd2	1266.1		37.2667	37.2667
82	GFP med_mouse2_MyoG_026.nd2	1149.59		-79.2433	0
83	GFP med_mouse2_MyoG_027.nd2	1291.89	1174.66	117.23	117.23
84	GFP med_mouse2_MyoG_027.nd2	1283.17		108.51	108.51
85	GFP med_mouse2_MyoG_027.nd2	1354.51		179.85	179.85
86	GFP med_mouse2_MyoG_027.nd2	1351.74		177.08	177.08
87	GFP med_mouse2_MyoG_027.nd2	1259.64		84.98	84.98
88	GFP med_mouse2_MyoG_027.nd2	1260.2		85.54	85.54
89	GFP med_mouse2_MyoG_027.nd2	1386.57		211.91	211.91
90	GFP med_mouse2_MyoG_027.nd2	1265.07		90.41	90.41
91	GFP med_mouse2_MyoG_027.nd2	1279.27		104.61	104.61
92	GFP med_mouse2_MyoG_028.nd2	1183.78	1137.47	46.3067	46.3067
93	GFP med_mouse2_MyoG_028.nd2	1264.5		127.027	127.027
94	GFP med_mouse2_MyoG_028.nd2	1267.72		130.247	130.247
95	GFP med_mouse2_MyoG_028.nd2	1223.48		86.0067	86.0067
96	GFP med_mouse2_MyoG_028.nd2	1277.83		140.357	140.357
97	GFP med_mouse2_MyoG_028.nd2	1205.59		68.1167	68.1167
98	GFP med_mouse2_MyoG_028.nd2	1251.38		113.907	113.907
99	GFP med_mouse2_MyoG_028.nd2	1314.25		176.777	176.777
100	GFP med_mouse2_MyoG_028.nd2	1164.56		27.0867	27.0867
101	GFP med_mouse2_MyoG_028.nd2	1240.31		102.837	102.837
102	GFP med_mouse2_MyoG_028.nd2	1131.2		-6.27333	0
103	GFP med_mouse2_MyoG_028.nd2	1178.53		41.0567	41.0567
104	GFP med_mouse2_MyoG_029.nd2	1510.15	1172.44	337.707	337.707
105	GFP med_mouse2_MyoG_029.nd2	1430.19		257.747	257.747
106	GFP med_mouse2_MyoG_029.nd2	1439.65		267.207	267.207
107	GFP med_mouse2_MyoG_029.nd2	1116.66		-55.7833	0
108	GFP med_mouse2_MyoG_029.nd2	1192.78		20.3367	20.3367
109	GFP med_mouse2_MyoG_029.nd2	1290.47		118.027	118.027
110	GFP med_mouse2_MyoG_029.nd2	1351.11		178.667	178.667
111	GFP med_mouse2_MyoG_029.nd2	1198.34		25.8967	25.8967
112	GFP med_mouse2_MyoG_029.nd2	1178.26		5.81667	5.81667
113	GFP med_mouse2_MyoG_029.nd2	1090.27		-82.1733	0
114	GFP med_mouse2_MyoG_029.nd2	1114.54		-57.9033	0
115	GFP med_mouse2_MyoG_030.nd2	1319.37	1113.36	206.013	206.013
116	GFP med_mouse2_MyoG_030.nd2	1235.95		122.593	122.593
117	GFP med_mouse2_MyoG_030.nd2	1228.95		115.593	115.593
118	GFP med_mouse2_MyoG_030.nd2	1112.6		-0.756667	0
119	GFP med_mouse2_MyoG_030.nd2	1100.99		-12.3667	0
120	GFP med_mouse2_MyoG_030.nd2	1218.24		104.883	104.883
121	GFP med_mouse2_MyoG_030.nd2	1196.16		82.8033	82.8033
122	GFP med_mouse2_MyoG_030.nd2	1281.94		168.583	168.583
123	GFP med_mouse2_MyoG_030.nd2	1230.77		117.413	117.413
124	GFP med_mouse2_MyoG_030.nd2	1191.05		77.6933	77.6933
125	GFP med_mouse2_MyoG_030.nd2	1303.22		189.863	189.863
126	GFP med_mouse2_MyoG_030.nd2	1249.24		135.883	135.883
127	GFP med_mouse2_MyoG_030.nd2	1110.33		-3.02667	0
128	GFP med_mouse2_MyoG_030.nd2	1204.76		91.4033	91.4033
129	GFP med_mouse2_MyoG_030.nd2	1539.77		426.413	426.413
130	GFP med_mouse2_MyoG_030.nd2	1206.32		92.9633	92.9633
131	GFP med_mouse2_MyoG_030.nd2	1311.26		197.903	197.903
132	GFP med_mouse2_MyoG_030.nd2	1060.84		-52.5167	0
133	GFP med_mouse2_MyoG_031.nd2	1395.5	1155.91	239.59	239.59
134	GFP med_mouse2_MyoG_031.nd2	1327.95		172.04	172.04
135	GFP med_mouse2_MyoG_031.nd2	1223.51		67.6	67.6
136	GFP med_mouse2_MyoG_031.nd2	1123.59		-32.32	0
137	GFP med_mouse2_MyoG_031.nd2	1196.37		40.46	40.46
138	GFP med_mouse2_MyoG_031.nd2	1225.64		69.73	69.73
139	GFP med_mouse2_MyoG_031.nd2	1260.13		104.22	104.22
140	GFP med_mouse2_MyoG_031.nd2	1251.52		95.61	95.61
141	GFP med_mouse2_MyoG_031.nd2	1172.18		16.27	16.27
142	GFP med_mouse2_MyoG_031.nd2	1306.75		150.84	150.84
143	GFP med_mouse2_MyoG_031.nd2	1168.14		12.23	12.23
144	GFP med_mouse2_MyoG_031.nd2	1139.68		-16.23	0
145	GFP med_mouse2_MyoG_031.nd2	1555.32		399.41	399.41
146	GFP med_mouse2_MyoG_032.nd2	1019.23	1130.68	-111.45	0
147	GFP med_mouse2_MyoG_032.nd2	1038.36		-92.32	0
148	GFP med_mouse2_MyoG_032.nd2	1190.86		60.18	60.18
149	GFP med_mouse2_MyoG_032.nd2	1199.47		68.79	68.79
150	GFP med_mouse2_MyoG_032.nd2	1217.46		86.78	86.78
151	GFP med_mouse2_MyoG_032.nd2	1218.96		88.28	88.28
152	GFP med_mouse2_MyoG_032.nd2	1128.23		-2.45	0
153	GFP med_mouse2_MyoG_032.nd2	1219.92		89.24	89.24
154	GFP med_mouse2_MyoG_032.nd2	1337.98		207.3	207.3
155	GFP med_mouse2_MyoG_032.nd2	1298.13		167.45	167.45
156	GFP med_mouse2_MyoG_033.nd2	1274	1166.32	107.677	107.677
157	GFP med_mouse2_MyoG_033.nd2	1442.06		275.737	275.737
158	GFP med_mouse2_MyoG_033.nd2	1449.59		283.267	283.267
159	GFP med_mouse2_MyoG_033.nd2	1224.32		57.9967	57.9967
160	GFP med_mouse2_MyoG_033.nd2	1182.24		15.9167	15.9167
161	GFP med_mouse2_MyoG_033.nd2	1169.61		3.28667	3.28667
162	GFP med_mouse2_MyoG_033.nd2	1241.87		75.5467	75.5467
163	GFP med_mouse2_MyoG_033.nd2	1223.39		57.0667	57.0667
164	GFP med_mouse2_MyoG_033.nd2	1227.02		60.6967	60.6967
165	GFP med_mouse2_MyoG_033.nd2	1146.04		-20.2833	0
166	GFP med_mouse2_MyoG_033.nd2	1240.64		74.3167	74.3167
167	GFP med_mouse2_MyoG_033.nd2	1335.33		169.007	169.007
168	GFP med_mouse2_MyoG_034.nd2	1296.52	1125.63	170.887	170.887
169	GFP med_mouse2_MyoG_034.nd2	1352.43		226.797	226.797
170	GFP med_mouse2_MyoG_034.nd2	1167.17		41.5367	41.5367
171	GFP med_mouse2_MyoG_034.nd2	1275.21		149.577	149.577
172	GFP med_mouse2_MyoG_034.nd2	1354.78		229.147	229.147
173	GFP med_mouse2_MyoG_034.nd2	1203.67		78.0367	78.0367
174	GFP med_mouse2_MyoG_034.nd2	1120.31		-5.32333	0
175	GFP med_mouse2_MyoG_034.nd2	1370.73		245.097	245.097
176	GFP med_mouse2_MyoG_034.nd2	1261.87		136.237	136.237
177	GFP med_mouse2_MyoG_034.nd2	1171.6		45.9667	45.9667
178	GFP med_mouse2_MyoG_034.nd2	1255.8		130.167	130.167
179	GFP med_mouse2_MyoG_035.nd2	1389.8	1196.56	193.237	193.237
180	GFP med_mouse2_MyoG_035.nd2	1283.12		86.5567	86.5567
181	GFP med_mouse2_MyoG_035.nd2	1251.86		55.2967	55.2967
182	GFP med_mouse2_MyoG_035.nd2	1112.28		-84.2833	0
183	GFP med_mouse2_MyoG_035.nd2	1252.52		55.9567	55.9567
184	GFP med_mouse2_MyoG_035.nd2	1137.92		-58.6433	0
185	GFP med_mouse2_MyoG_036.nd2	1471.75	1252.89	218.86	218.86
186	GFP med_mouse2_MyoG_036.nd2	1412.99		160.1	160.1
187	GFP med_mouse2_MyoG_036.nd2	1392.31		139.42	139.42
188	GFP med_mouse2_MyoG_036.nd2	1256.79		3.9	3.9
189	GFP med_mouse2_MyoG_036.nd2	1347.89		95	95
190	GFP med_mouse2_MyoG_036.nd2	1345.25		92.36	92.36
191	GFP med_mouse2_MyoG_036.nd2	1196.51		-56.38	0
192	GFP med_mouse2_MyoG_036.nd2	1184.47		-68.42	0
193	GFP med_mouse2_MyoG_036.nd2	1147.14		-105.75	0
194	GFP med_mouse2_MyoG_036.nd2	1161.8		-91.09	0
195	GFP med_mouse2_MyoG_036.nd2	1132.98		-119.91	0
196	GFP med_mouse2_MyoG_036.nd2	1021.05		-231.84	0
197	GFP med_mouse2_MyoG_037.nd2	1471.11	1131.36	339.753	339.753
198	GFP med_mouse2_MyoG_037.nd2	1326.75		195.393	195.393
199	GFP med_mouse2_MyoG_037.nd2	1337.31		205.953	205.953
200	GFP med_mouse2_MyoG_037.nd2	1215.99		84.6333	84.6333
201	GFP med_mouse2_MyoG_037.nd2	1130.36		-0.996667	0
202	GFP med_mouse2_MyoG_037.nd2	1259.17		127.813	127.813
203	GFP med_mouse2_MyoG_037.nd2	1387.53		256.173	256.173
204	GFP med_mouse2_MyoG_037.nd2	1335.38		204.023	204.023
205	GFP med_mouse2_MyoG_037.nd2	1116.79		-14.5667	0
206	GFP med_mouse2_MyoG_037.nd2	1270.17		138.813	138.813
207	GFP med_mouse2_MyoG_037.nd2	1118.18		-13.1767	0
208	GFP med_mouse2_MyoG_037.nd2	1221.53		90.1733	90.1733
209	GFP med_mouse2_MyoG_037.nd2	1208.06		76.7033	76.7033
210	GFP med_mouse2_MyoG_037.nd2	1167.64		36.2833	36.2833
211	GFP med_mouse2_MyoG_037.nd2	1173.82		42.4633	42.4633
212	GFP med_mouse2_MyoG_038.nd2	1320.31	1195.09	125.217	125.217
213	GFP med_mouse2_MyoG_038.nd2	1035.18		-159.913	0
214	GFP med_mouse2_MyoG_038.nd2	1218.06		22.9667	22.9667
215	GFP med_mouse2_MyoG_038.nd2	1125.5		-69.5933	0
216	GFP med_mouse2_MyoG_038.nd2	1257.01		61.9167	61.9167
217	GFP med_mouse2_MyoG_038.nd2	1247.69		52.5967	52.5967
218	GFP med_mouse2_MyoG_038.nd2	1214.65		19.5567	19.5567
219	GFP med_mouse2_MyoG_038.nd2	1376.73		181.637	181.637
220	GFP med_mouse2_MyoG_039.nd2	1290.11	1122.73	167.377	167.377
221	GFP med_mouse2_MyoG_039.nd2	1226.48		103.747	103.747
222	GFP med_mouse2_MyoG_039.nd2	1375.06		252.327	252.327
223	GFP med_mouse2_MyoG_039.nd2	1262.92		140.187	140.187
224	GFP med_mouse2_MyoG_039.nd2	947.44		-175.293	0
225	GFP med_mouse2_MyoG_039.nd2	1195.84		73.1067	73.1067
226	GFP med_mouse2_MyoG_039.nd2	1142.18		19.4467	19.4467
227	GFP med_mouse2_MyoG_039.nd2	1228.33		105.597	105.597
228	GFP med_mouse2_MyoG_040.nd2	1435.79	1122.34	313.447	313.447
229	GFP med_mouse2_MyoG_040.nd2	941.89		-180.453	0
230	GFP med_mouse2_MyoG_040.nd2	1141.06		18.7167	18.7167
231	GFP med_mouse2_MyoG_040.nd2	1207.77		85.4267	85.4267
232	GFP med_mouse2_MyoG_040.nd2	1251.9		129.557	129.557
233	GFP med_mouse2_MyoG_040.nd2	1361.35		239.007	239.007
234	GFP med_mouse2_MyoG_040.nd2	1239.44		117.097	117.097
235	GFP med_mouse2_MyoG_040.nd2	1223.21		100.867	100.867
236	GFP med_mouse2_MyoG_040.nd2	1160.76		38.4167	38.4167

## Sheet: Low GFP_mouse2
Item	Source	MyoG (TxRed) mean intensity	TxRed background	MyoG mean intensity	Corrected minus to zeros
1	GFP lo_mouse2_MyoG_028.nd2	1278.29	1042.84	235.45	235.45
2	GFP lo_mouse2_MyoG_028.nd2	1315.92		273.08	273.08
3	GFP lo_mouse2_MyoG_028.nd2	1413.81		370.97	370.97
4	GFP lo_mouse2_MyoG_028.nd2	1319.19		276.35	276.35
5	GFP lo_mouse2_MyoG_028.nd2	1052.82		9.98	9.98
6	GFP lo_mouse2_MyoG_028.nd2	1275.03		232.19	232.19
7	GFP lo_mouse2_MyoG_028.nd2	1187.18		144.34	144.34
8	GFP lo_mouse2_MyoG_028.nd2	1138.33		95.49	95.49
9	GFP lo_mouse2_MyoG_028.nd2	1081.91		39.07	39.07
10	GFP lo_mouse2_MyoG_028.nd2	1142.68		99.84	99.84
11	GFP lo_mouse2_MyoG_028.nd2	1176.37		133.53	133.53
12	GFP lo_mouse2_MyoG_028.nd2	1154.61		111.77	111.77
13	GFP lo_mouse2_MyoG_028.nd2	1185.6		142.76	142.76
14	GFP lo_mouse2_MyoG_028.nd2	1204.74		161.9	161.9
15	GFP lo_mouse2_MyoG_028.nd2	1061.82		18.98	18.98
16	GFP lo_mouse2_MyoG_028.nd2	1182.91		140.07	140.07
17	GFP lo_mouse2_MyoG_028.nd2	1195.24		152.4	152.4
18	GFP lo_mouse2_MyoG_028.nd2	997.2		-45.64	0
19	GFP lo_mouse2_MyoG_028.nd2	1282.71		239.87	239.87
20	GFP lo_mouse2_MyoG_028.nd2	1185.64		142.8	142.8
21	GFP lo_mouse2_MyoG_028.nd2	1236.43		193.59	193.59
22	GFP lo_mouse2_MyoG_028.nd2	1145.84		103	103
23	GFP lo_mouse2_MyoG_028.nd2	1263.4		220.56	220.56
24	GFP lo_mouse2_MyoG_029.nd2	1474.04	1056.13	417.913	417.913
25	GFP lo_mouse2_MyoG_029.nd2	1218.75		162.623	162.623
26	GFP lo_mouse2_MyoG_029.nd2	1348.64		292.513	292.513
27	GFP lo_mouse2_MyoG_029.nd2	1465.88		409.753	409.753
28	GFP lo_mouse2_MyoG_029.nd2	1300.19		244.063	244.063
29	GFP lo_mouse2_MyoG_029.nd2	1342.12		285.993	285.993
30	GFP lo_mouse2_MyoG_029.nd2	1238.95		182.823	182.823
31	GFP lo_mouse2_MyoG_029.nd2	1212.4		156.273	156.273
32	GFP lo_mouse2_MyoG_029.nd2	1121.42		65.2933	65.2933
33	GFP lo_mouse2_MyoG_029.nd2	1155.95		99.8233	99.8233
34	GFP lo_mouse2_MyoG_029.nd2	1177.92		121.793	121.793
35	GFP lo_mouse2_MyoG_029.nd2	1278.65		222.523	222.523
36	GFP lo_mouse2_MyoG_029.nd2	1258.26		202.133	202.133
37	GFP lo_mouse2_MyoG_029.nd2	1316.35		260.223	260.223
38	GFP lo_mouse2_MyoG_029.nd2	1069.59		13.4633	13.4633
39	GFP lo_mouse2_MyoG_029.nd2	1097.03		40.9033	40.9033
40	GFP lo_mouse2_MyoG_029.nd2	1225.9		169.773	169.773
41	GFP lo_mouse2_MyoG_029.nd2	1296.68		240.553	240.553
42	GFP lo_mouse2_MyoG_030.nd2	1168.75	1081.13	87.6233	87.6233
43	GFP lo_mouse2_MyoG_030.nd2	1271.21		190.083	190.083
44	GFP lo_mouse2_MyoG_030.nd2	1254.94		173.813	173.813
45	GFP lo_mouse2_MyoG_030.nd2	1304.29		223.163	223.163
46	GFP lo_mouse2_MyoG_030.nd2	1252.4		171.273	171.273
47	GFP lo_mouse2_MyoG_030.nd2	1564.27		483.143	483.143
48	GFP lo_mouse2_MyoG_030.nd2	1344.78		263.653	263.653
49	GFP lo_mouse2_MyoG_030.nd2	1132.04		50.9133	50.9133
50	GFP lo_mouse2_MyoG_030.nd2	1288.21		207.083	207.083
51	GFP lo_mouse2_MyoG_030.nd2	1103.94		22.8133	22.8133
52	GFP lo_mouse2_MyoG_030.nd2	891.65		-189.477	0
53	GFP lo_mouse2_MyoG_030.nd2	1253.36		172.233	172.233
54	GFP lo_mouse2_MyoG_030.nd2	1077.34		-3.78667	0
55	GFP lo_mouse2_MyoG_030.nd2	1252.52		171.393	171.393
56	GFP lo_mouse2_MyoG_031.nd2	1325.37	1103.34	222.027	222.027
57	GFP lo_mouse2_MyoG_031.nd2	1359.21		255.867	255.867
58	GFP lo_mouse2_MyoG_031.nd2	1327.01		223.667	223.667
59	GFP lo_mouse2_MyoG_031.nd2	1238.07		134.727	134.727
60	GFP lo_mouse2_MyoG_031.nd2	1291.52		188.177	188.177
61	GFP lo_mouse2_MyoG_031.nd2	1388.33		284.987	284.987
62	GFP lo_mouse2_MyoG_031.nd2	1219.17		115.827	115.827
63	GFP lo_mouse2_MyoG_031.nd2	1238.6		135.257	135.257
64	GFP lo_mouse2_MyoG_031.nd2	1121.43		18.0867	18.0867
65	GFP lo_mouse2_MyoG_031.nd2	1201.11		97.7667	97.7667
66	GFP lo_mouse2_MyoG_031.nd2	1111.73		8.38667	8.38667
67	GFP lo_mouse2_MyoG_031.nd2	1273.73		170.387	170.387
68	GFP lo_mouse2_MyoG_031.nd2	1399.25		295.907	295.907
69	GFP lo_mouse2_MyoG_031.nd2	1316.59		213.247	213.247
70	GFP lo_mouse2_MyoG_032.nd2	1247.38	1087.23	160.15	160.15
71	GFP lo_mouse2_MyoG_032.nd2	1320.05		232.82	232.82
72	GFP lo_mouse2_MyoG_032.nd2	1132.16		44.93	44.93
73	GFP lo_mouse2_MyoG_032.nd2	1296.81		209.58	209.58
74	GFP lo_mouse2_MyoG_032.nd2	1212.64		125.41	125.41
75	GFP lo_mouse2_MyoG_032.nd2	1250.48		163.25	163.25
76	GFP lo_mouse2_MyoG_032.nd2	1278.7		191.47	191.47
77	GFP lo_mouse2_MyoG_033.nd2	1152.57	1090.76	61.81	61.81
78	GFP lo_mouse2_MyoG_033.nd2	1178.57		87.81	87.81
79	GFP lo_mouse2_MyoG_033.nd2	1287.76		197	197
80	GFP lo_mouse2_MyoG_033.nd2	1311.68		220.92	220.92
81	GFP lo_mouse2_MyoG_033.nd2	1100.8		10.04	10.04
82	GFP lo_mouse2_MyoG_033.nd2	1134.54		43.78	43.78
83	GFP lo_mouse2_MyoG_033.nd2	1173.24		82.48	82.48
84	GFP lo_mouse2_MyoG_033.nd2	1152.36		61.6	61.6
85	GFP lo_mouse2_MyoG_033.nd2	1086.89		-3.87	0
86	GFP lo_mouse2_MyoG_034.nd2	1266.47	1078.92	187.553	187.553
87	GFP lo_mouse2_MyoG_034.nd2	1240.93		162.013	162.013
88	GFP lo_mouse2_MyoG_034.nd2	1269.46		190.543	190.543
89	GFP lo_mouse2_MyoG_034.nd2	1326.99		248.073	248.073
90	GFP lo_mouse2_MyoG_034.nd2	1208.3		129.383	129.383
91	GFP lo_mouse2_MyoG_034.nd2	1220.67		141.753	141.753
92	GFP lo_mouse2_MyoG_034.nd2	1274.56		195.643	195.643
93	GFP lo_mouse2_MyoG_034.nd2	1134.21		55.2933	55.2933
94	GFP lo_mouse2_MyoG_034.nd2	1101.67		22.7533	22.7533
95	GFP lo_mouse2_MyoG_034.nd2	1160.73		81.8133	81.8133
96	GFP lo_mouse2_MyoG_034.nd2	1043.48		-35.4367	0
97	GFP lo_mouse2_MyoG_034.nd2	880.59		-198.327	0
98	GFP lo_mouse2_MyoG_034.nd2	1054.39		-24.5267	0
99	GFP lo_mouse2_MyoG_034.nd2	1271.85		192.933	192.933
100	GFP lo_mouse2_MyoG_034.nd2	1382.55		303.633	303.633
101	GFP lo_mouse2_MyoG_034.nd2	1346.87		267.953	267.953
102	GFP lo_mouse2_MyoG_034.nd2	1029.17		-49.7467	0
103	GFP lo_mouse2_MyoG_035.nd2	2068.3	1066.39	1001.91	1001.91
104	GFP lo_mouse2_MyoG_035.nd2	1282.94		216.547	216.547
105	GFP lo_mouse2_MyoG_035.nd2	1223.03		156.637	156.637
106	GFP lo_mouse2_MyoG_035.nd2	1420.57		354.177	354.177
107	GFP lo_mouse2_MyoG_035.nd2	1115.88		49.4867	49.4867
108	GFP lo_mouse2_MyoG_035.nd2	1419.27		352.877	352.877
109	GFP lo_mouse2_MyoG_035.nd2	1131.58		65.1867	65.1867
110	GFP lo_mouse2_MyoG_035.nd2	1110.57		44.1767	44.1767
111	GFP lo_mouse2_MyoG_035.nd2	1420.38		353.987	353.987
112	GFP lo_mouse2_MyoG_035.nd2	1149.96		83.5667	83.5667
113	GFP lo_mouse2_MyoG_035.nd2	1165.12		98.7267	98.7267
114	GFP lo_mouse2_MyoG_035.nd2	1194.14		127.747	127.747
115	GFP lo_mouse2_MyoG_035.nd2	1287.2		220.807	220.807
116	GFP lo_mouse2_MyoG_035.nd2	1120.69		54.2967	54.2967
117	GFP lo_mouse2_MyoG_035.nd2	1176.82		110.427	110.427
118	GFP lo_mouse2_MyoG_035.nd2	1234.6		168.207	168.207
119	GFP lo_mouse2_MyoG_035.nd2	1127.64		61.2467	61.2467
120	GFP lo_mouse2_MyoG_036.nd2	1521.49	1034.93	486.563	486.563
121	GFP lo_mouse2_MyoG_036.nd2	1323.83		288.903	288.903
122	GFP lo_mouse2_MyoG_036.nd2	1187.27		152.343	152.343
123	GFP lo_mouse2_MyoG_036.nd2	1252.26		217.333	217.333
124	GFP lo_mouse2_MyoG_036.nd2	1257.09		222.163	222.163
125	GFP lo_mouse2_MyoG_036.nd2	1170.75		135.823	135.823
126	GFP lo_mouse2_MyoG_036.nd2	1081.54		46.6133	46.6133
127	GFP lo_mouse2_MyoG_036.nd2	1231.93		197.003	197.003
128	GFP lo_mouse2_MyoG_036.nd2	1347.55		312.623	312.623
129	GFP lo_mouse2_MyoG_036.nd2	1310.07		275.143	275.143
130	GFP lo_mouse2_MyoG_036.nd2	1185.54		150.613	150.613
131	GFP lo_mouse2_MyoG_036.nd2	1218.41		183.483	183.483
132	GFP lo_mouse2_MyoG_036.nd2	1147.79		112.863	112.863
133	GFP lo_mouse2_MyoG_036.nd2	1133.85		98.9233	98.9233
134	GFP lo_mouse2_MyoG_036.nd2	1152.66		117.733	117.733
135	GFP lo_mouse2_MyoG_036.nd2	1198.79		163.863	163.863
136	GFP lo_mouse2_MyoG_036.nd2	1324.01		289.083	289.083
137	GFP lo_mouse2_MyoG_036.nd2	1398.27		363.343	363.343
138	GFP lo_mouse2_MyoG_036.nd2	1173.58		138.653	138.653
139	GFP lo_mouse2_MyoG_036.nd2	1211.16		176.233	176.233
140	GFP lo_mouse2_MyoG_036.nd2	1285.77		250.843	250.843
141	GFP lo_mouse2_MyoG_037.nd2	1365.74	1054.03	311.707	311.707
142	GFP lo_mouse2_MyoG_037.nd2	1327.57		273.537	273.537
143	GFP lo_mouse2_MyoG_037.nd2	1115.65		61.6167	61.6167
144	GFP lo_mouse2_MyoG_037.nd2	1107.38		53.3467	53.3467
145	GFP lo_mouse2_MyoG_037.nd2	1361.1		307.067	307.067
146	GFP lo_mouse2_MyoG_037.nd2	1394.58		340.547	340.547
147	GFP lo_mouse2_MyoG_037.nd2	1301.13		247.097	247.097
148	GFP lo_mouse2_MyoG_037.nd2	1069.41		15.3767	15.3767
149	GFP lo_mouse2_MyoG_037.nd2	1183.16		129.127	129.127
150	GFP lo_mouse2_MyoG_037.nd2	1403.23		349.197	349.197
151	GFP lo_mouse2_MyoG_037.nd2	1274.35		220.317	220.317
152	GFP lo_mouse2_MyoG_037.nd2	1013.91		-40.1233	0
153	GFP lo_mouse2_MyoG_037.nd2	1275.24		221.207	221.207
154	GFP lo_mouse2_MyoG_037.nd2	1217.28		163.247	163.247
155	GFP lo_mouse2_MyoG_037.nd2	1296.8		242.767	242.767
156	GFP lo_mouse2_MyoG_037.nd2	1105.85		51.8167	51.8167
157	GFP lo_mouse2_MyoG_037.nd2	1006.8		-47.2333	0
158	GFP lo_mouse2_MyoG_037.nd2	1050.95		-3.08333	0
159	GFP lo_mouse2_MyoG_037.nd2	1124.76		70.7267	70.7267
160	GFP lo_mouse2_MyoG_037.nd2	1218.48		164.447	164.447
161	GFP lo_mouse2_MyoG_037.nd2	1243.68		189.647	189.647
162	GFP lo_mouse2_MyoG_037.nd2	1262.73		208.697	208.697
163	GFP lo_mouse2_MyoG_037.nd2	1144.13		90.0967	90.0967
164	GFP lo_mouse2_MyoG_037.nd2	1036.74		-17.2933	0
165	GFP lo_mouse2_MyoG_038.nd2	1312.89	1070.83	242.063	242.063
166	GFP lo_mouse2_MyoG_038.nd2	1326.64		255.813	255.813
167	GFP lo_mouse2_MyoG_038.nd2	1351.23		280.403	280.403
168	GFP lo_mouse2_MyoG_038.nd2	1333.69		262.863	262.863
169	GFP lo_mouse2_MyoG_038.nd2	1386.89		316.063	316.063
170	GFP lo_mouse2_MyoG_038.nd2	1387.66		316.833	316.833
171	GFP lo_mouse2_MyoG_038.nd2	1243.04		172.213	172.213
172	GFP lo_mouse2_MyoG_038.nd2	1307.11		236.283	236.283
173	GFP lo_mouse2_MyoG_038.nd2	1177.41		106.583	106.583
174	GFP lo_mouse2_MyoG_038.nd2	1398.29		327.463	327.463
175	GFP lo_mouse2_MyoG_038.nd2	1252.26		181.433	181.433
176	GFP lo_mouse2_MyoG_038.nd2	1167.91		97.0833	97.0833
177	GFP lo_mouse2_MyoG_038.nd2	1149.11		78.2833	78.2833
178	GFP lo_mouse2_MyoG_038.nd2	1203.07		132.243	132.243
179	GFP lo_mouse2_MyoG_038.nd2	1032.9		-37.9267	0
180	GFP lo_mouse2_MyoG_038.nd2	1010.05		-60.7767	0
181	GFP lo_mouse2_MyoG_038.nd2	1187		116.173	116.173
182	GFP lo_mouse2_MyoG_038.nd2	1147.69		76.8633	76.8633
183	GFP lo_mouse2_MyoG_038.nd2	1187.53		116.703	116.703
184	GFP lo_mouse2_MyoG_038.nd2	1295.49		224.663	224.663
185	GFP lo_mouse2_MyoG_038.nd2	1052.55		-18.2767	0
186	GFP lo_mouse2_MyoG_038.nd2	944.22		-126.607	0
187	GFP lo_mouse2_MyoG_038.nd2	1460.01		389.183	389.183
188	GFP lo_mouse2_MyoG_038.nd2	1174.02		103.193	103.193
189	GFP lo_mouse2_MyoG_038.nd2	1297.75		226.923	226.923
190	GFP lo_mouse2_MyoG_039.nd2	1353.03	1099.09	253.94	253.94
191	GFP lo_mouse2_MyoG_039.nd2	1605.45		506.36	506.36
192	GFP lo_mouse2_MyoG_039.nd2	1410.49		311.4	311.4
193	GFP lo_mouse2_MyoG_039.nd2	1267.28		168.19	168.19
194	GFP lo_mouse2_MyoG_039.nd2	1404.44		305.35	305.35
195	GFP lo_mouse2_MyoG_039.nd2	1347.9		248.81	248.81
196	GFP lo_mouse2_MyoG_039.nd2	1235.19		136.1	136.1
197	GFP lo_mouse2_MyoG_039.nd2	1273.09		174	174
198	GFP lo_mouse2_MyoG_039.nd2	1282.44		183.35	183.35
199	GFP lo_mouse2_MyoG_039.nd2	1270.6		171.51	171.51
200	GFP lo_mouse2_MyoG_039.nd2	1268.4		169.31	169.31
201	GFP lo_mouse2_MyoG_039.nd2	1258.15		159.06	159.06
202	GFP lo_mouse2_MyoG_039.nd2	1205.04		105.95	105.95
203	GFP lo_mouse2_MyoG_039.nd2	1343.16		244.07	244.07
204	GFP lo_mouse2_MyoG_039.nd2	1151.13		52.04	52.04
205	GFP lo_mouse2_MyoG_039.nd2	1296.48		197.39	197.39
206	GFP lo_mouse2_MyoG_039.nd2	1174.78		75.69	75.69
207	GFP lo_mouse2_MyoG_039.nd2	1193.05		93.96	93.96
208	GFP lo_mouse2_MyoG_039.nd2	1114.52		15.43	15.43
209	GFP lo_mouse2_MyoG_039.nd2	1164.23		65.14	65.14
210	GFP lo_mouse2_MyoG_039.nd2	1128.08		28.99	28.99
211	GFP lo_mouse2_MyoG_039.nd2	1177.22		78.13	78.13
212	GFP lo_mouse2_MyoG_039.nd2	1229.67		130.58	130.58
213	GFP lo_mouse2_MyoG_039.nd2	1187.07		87.98	87.98
214	GFP lo_mouse2_MyoG_039.nd2	1334.38		235.29	235.29
215	GFP lo_mouse2_MyoG_039.nd2	1132.17		33.08	33.08
216	GFP lo_mouse2_MyoG_039.nd2	1162.85		63.76	63.76
217	GFP lo_mouse2_MyoG_039.nd2	1192.81		93.72	93.72
218	GFP lo_mouse2_MyoG_039.nd2	1280.35		181.26	181.26
219	GFP lo_mouse2_MyoG_039.nd2	1240.16		141.07	141.07
220	GFP lo_mouse2_MyoG_039.nd2	1481.8		382.71	382.71
221	GFP lo_mouse2_MyoG_039.nd2	1222.12		123.03	123.03
222	GFP lo_mouse2_MyoG_039.nd2	1198.04		98.95	98.95
223	GFP lo_mouse2_MyoG_039.nd2	1129.36		30.27	30.27
224	GFP lo_mouse2_MyoG_039.nd2	1159.03		59.94	59.94
225	GFP lo_mouse2_MyoG_039.nd2	1273.13		174.04	174.04
226	GFP lo_mouse2_MyoG_039.nd2	1111.8		12.71	12.71
227	GFP lo_mouse2_MyoG_039.nd2	1193.03		93.94	93.94
228	GFP lo_mouse2_MyoG_040.nd2	1325.41	1143.52	181.893	181.893
229	GFP lo_mouse2_MyoG_040.nd2	1332.12		188.603	188.603
230	GFP lo_mouse2_MyoG_040.nd2	1109.21		-34.3067	0
231	GFP lo_mouse2_MyoG_040.nd2	1052.51		-91.0067	0
232	GFP lo_mouse2_MyoG_040.nd2	1476.36		332.843	332.843
233	GFP lo_mouse2_MyoG_040.nd2	1259.62		116.103	116.103
234	GFP lo_mouse2_MyoG_040.nd2	1303.96		160.443	160.443
235	GFP lo_mouse2_MyoG_040.nd2	1385.12		241.603	241.603
236	GFP lo_mouse2_MyoG_040.nd2	1198.53		55.0133	55.0133
237	GFP lo_mouse2_MyoG_040.nd2	1263.29		119.773	119.773
238	GFP lo_mouse2_MyoG_040.nd2	1179.9		36.3833	36.3833
239	GFP lo_mouse2_MyoG_040.nd2	1159.73		16.2133	16.2133
240	GFP lo_mouse2_MyoG_040.nd2	1346.55		203.033	203.033
241	GFP lo_mouse2_MyoG_040.nd2	1189.96		46.4433	46.4433
242	GFP lo_mouse2_MyoG_040.nd2	1339.65		196.133	196.133
243	GFP lo_mouse2_MyoG_041.nd2	1380.59	1179.67	200.923	200.923
244	GFP lo_mouse2_MyoG_041.nd2	1501.35		321.683	321.683
245	GFP lo_mouse2_MyoG_041.nd2	1419.63		239.963	239.963
246	GFP lo_mouse2_MyoG_041.nd2	1289.26		109.593	109.593
247	GFP lo_mouse2_MyoG_041.nd2	1321.01		141.343	141.343
248	GFP lo_mouse2_MyoG_041.nd2	1269.15		89.4833	89.4833
249	GFP lo_mouse2_MyoG_041.nd2	1380.15		200.483	200.483
250	GFP lo_mouse2_MyoG_041.nd2	1185.04		5.37333	5.37333
251	GFP lo_mouse2_MyoG_041.nd2	1024.64		-155.027	0
252	GFP lo_mouse2_MyoG_042.nd2	1339.01	1169.3	169.71	169.71
253	GFP lo_mouse2_MyoG_042.nd2	1233.53		64.23	64.23
254	GFP lo_mouse2_MyoG_043.nd2	1368.78	1161.13	207.65	207.65
255	GFP lo_mouse2_MyoG_043.nd2	1255.47		94.34	94.34
256	GFP lo_mouse2_MyoG_043.nd2	1503.31		342.18	342.18
257	GFP lo_mouse2_MyoG_043.nd2	1131.33		-29.8	0
258	GFP lo_mouse2_MyoG_043.nd2	1263.83		102.7	102.7
259	GFP lo_mouse2_MyoG_043.nd2	1329.61		168.48	168.48
260	GFP lo_mouse2_MyoG_043.nd2	1174.42		13.29	13.29
261	GFP lo_mouse2_MyoG_043.nd2	1161.06		-0.07	0
262	GFP lo_mouse2_MyoG_043.nd2	1273.66		112.53	112.53
263	GFP lo_mouse2_MyoG_043.nd2	1236.03		74.9	74.9
264	GFP lo_mouse2_MyoG_043.nd2	1083.83		-77.3	0
265	GFP lo_mouse2_MyoG_043.nd2	1260.74		99.61	99.61
266	GFP lo_mouse2_MyoG_043.nd2	1239.33		78.2	78.2
267	GFP lo_mouse2_MyoG_043.nd2	1344.65		183.52	183.52
268	GFP lo_mouse2_MyoG_043.nd2	1214.63		53.5	53.5
269	GFP lo_mouse2_MyoG_044.nd2	1525.82	1167.63	358.193	358.193
270	GFP lo_mouse2_MyoG_044.nd2	1233.27		65.6433	65.6433
271	GFP lo_mouse2_MyoG_044.nd2	1326.17		158.543	158.543
272	GFP lo_mouse2_MyoG_044.nd2	1192.13		24.5033	24.5033
273	GFP lo_mouse2_MyoG_044.nd2	1246.01		78.3833	78.3833
274	GFP lo_mouse2_MyoG_044.nd2	1153.77		-13.8567	0
275	GFP lo_mouse2_MyoG_044.nd2	1319.37		151.743	151.743
276	GFP lo_mouse2_MyoG_044.nd2	1293.87		126.243	126.243
277	GFP lo_mouse2_MyoG_044.nd2	1197.34		29.7133	29.7133
278	GFP lo_mouse2_MyoG_044.nd2	1381.37		213.743	213.743
279	GFP lo_mouse2_MyoG_044.nd2	1175.08		7.45333	7.45333
280	GFP lo_mouse2_MyoG_044.nd2	1293.58		125.953	125.953
281	GFP lo_mouse2_MyoG_044.nd2	1176.78		9.15333	9.15333
282	GFP lo_mouse2_MyoG_044.nd2	1300.01		132.383	132.383
283	GFP lo_mouse2_MyoG_044.nd2	1204.64		37.0133	37.0133
284	GFP lo_mouse2_MyoG_044.nd2	1326.73		159.103	159.103
285	GFP lo_mouse2_MyoG_044.nd2	1199.99		32.3633	32.3633
286	GFP lo_mouse2_MyoG_044.nd2	1162.02		-5.60667	0
287	GFP lo_mouse2_MyoG_044.nd2	1134.23		-33.3967	0
288	GFP lo_mouse2_MyoG_044.nd2	1347.74		180.113	180.113
289	GFP lo_mouse2_MyoG_044.nd2	1215.69		48.0633	48.0633
290	GFP lo_mouse2_MyoG_044.nd2	1181.1		13.4733	13.4733
291	GFP lo_mouse2_MyoG_044.nd2	1277.11		109.483	109.483
292	GFP lo_mouse2_MyoG_044.nd2	1278.84		111.213	111.213
293	GFP lo_mouse2_MyoG_045.nd2	1409.39	1113.92	295.467	295.467
294	GFP lo_mouse2_MyoG_045.nd2	1363.54		249.617	249.617
295	GFP lo_mouse2_MyoG_045.nd2	1307.32		193.397	193.397
296	GFP lo_mouse2_MyoG_045.nd2	1259.43		145.507	145.507
297	GFP lo_mouse2_MyoG_045.nd2	1218.71		104.787	104.787
298	GFP lo_mouse2_MyoG_045.nd2	1254.06		140.137	140.137
299	GFP lo_mouse2_MyoG_045.nd2	1276.26		162.337	162.337
300	GFP lo_mouse2_MyoG_045.nd2	1157.46		43.5367	43.5367
301	GFP lo_mouse2_MyoG_045.nd2	1197.34		83.4167	83.4167
302	GFP lo_mouse2_MyoG_045.nd2	1080.19		-33.7333	0
303	GFP lo_mouse2_MyoG_045.nd2	1228.77		114.847	114.847
304	GFP lo_mouse2_MyoG_045.nd2	1136.92		22.9967	22.9967
305	GFP lo_mouse2_MyoG_045.nd2	1194.26		80.3367	80.3367
306	GFP lo_mouse2_MyoG_045.nd2	1214.52		100.597	100.597
307	GFP lo_mouse2_MyoG_045.nd2	1214.09		100.167	100.167
308	GFP lo_mouse2_MyoG_045.nd2	1172.15		58.2267	58.2267
309	GFP lo_mouse2_MyoG_045.nd2	1205.79		91.8667	91.8667
310	GFP lo_mouse2_MyoG_045.nd2	1159.33		45.4067	45.4067
311	GFP lo_mouse2_MyoG_045.nd2	1158.67		44.7467	44.7467
312	GFP lo_mouse2_MyoG_045.nd2	1274.14		160.217	160.217
313	GFP lo_mouse2_MyoG_045.nd2	1283.96		170.037	170.037
314	GFP lo_mouse2_MyoG_045.nd2	1273.21		159.287	159.287
315	GFP lo_mouse2_MyoG_045.nd2	1037.64		-76.2833	0
316	GFP lo_mouse2_MyoG_045.nd2	1303.26		189.337	189.337
317	GFP lo_mouse2_MyoG_045.nd2	1336.72		222.797	222.797
318	GFP lo_mouse2_MyoG_045.nd2	902.06		-211.863	0
319	GFP lo_mouse2_MyoG_045.nd2	953.37		-160.553	0
320	GFP lo_mouse2_MyoG_045.nd2	1235.14		121.217	121.217
321	GFP lo_mouse2_MyoG_045.nd2	1088.05		-25.8733	0
322	GFP lo_mouse2_MyoG_045.nd2	1305.86		191.937	191.937

## Sheet: Hi GFP_mouse3
Item	Source	MyoG (TxRed) mean intensity	TxRed background	MyoG mean intensity	Corrected minus to zeros
1	GFP hi_mouse3_MyoG_051.nd2	1373.11	1222.18	150.927	150.927
2	GFP hi_mouse3_MyoG_051.nd2	1336.22		114.037	114.037
3	GFP hi_mouse3_MyoG_051.nd2	1327.99		105.807	105.807
4	GFP hi_mouse3_MyoG_051.nd2	1274.69		52.5067	52.5067
5	GFP hi_mouse3_MyoG_051.nd2	1240.49		18.3067	18.3067
6	GFP hi_mouse3_MyoG_051.nd2	1277.66		55.4767	55.4767
7	GFP hi_mouse3_MyoG_051.nd2	1303.34		81.1567	81.1567
8	GFP hi_mouse3_MyoG_051.nd2	1191.92		-30.2633	0
9	GFP hi_mouse3_MyoG_051.nd2	1021.42		-200.763	0
10	GFP hi_mouse3_MyoG_051.nd2	1277.87		55.6867	55.6867
11	GFP hi_mouse3_MyoG_051.nd2	1223.07		0.886667	0.886667
12	GFP hi_mouse3_MyoG_052.nd2	1477.18	1210.54	266.643	266.643
13	GFP hi_mouse3_MyoG_052.nd2	1394.54		184.003	184.003
14	GFP hi_mouse3_MyoG_052.nd2	1321.15		110.613	110.613
15	GFP hi_mouse3_MyoG_052.nd2	1355.34		144.803	144.803
16	GFP hi_mouse3_MyoG_052.nd2	1374.52		163.983	163.983
17	GFP hi_mouse3_MyoG_052.nd2	1271.69		61.1533	61.1533
18	GFP hi_mouse3_MyoG_052.nd2	1373.91		163.373	163.373
19	GFP hi_mouse3_MyoG_052.nd2	1377.87		167.333	167.333
20	GFP hi_mouse3_MyoG_052.nd2	1419.55		209.013	209.013
21	GFP hi_mouse3_MyoG_052.nd2	1375.02		164.483	164.483
22	GFP hi_mouse3_MyoG_052.nd2	1267.91		57.3733	57.3733
23	GFP hi_mouse3_MyoG_052.nd2	1316.42		105.883	105.883
24	GFP hi_mouse3_MyoG_052.nd2	1322.41		111.873	111.873
25	GFP hi_mouse3_MyoG_052.nd2	1311.49		100.953	100.953
26	GFP hi_mouse3_MyoG_052.nd2	1246.96		36.4233	36.4233
27	GFP hi_mouse3_MyoG_052.nd2	1278.97		68.4333	68.4333
28	GFP hi_mouse3_MyoG_052.nd2	1273.24		62.7033	62.7033
29	GFP hi_mouse3_MyoG_053.nd2	1421.29	1226.76	194.527	194.527
30	GFP hi_mouse3_MyoG_053.nd2	1302.82		76.0567	76.0567
31	GFP hi_mouse3_MyoG_053.nd2	1320.38		93.6167	93.6167
32	GFP hi_mouse3_MyoG_053.nd2	1343.92		117.157	117.157
33	GFP hi_mouse3_MyoG_053.nd2	1260.58		33.8167	33.8167
34	GFP hi_mouse3_MyoG_053.nd2	1275.64		48.8767	48.8767
35	GFP hi_mouse3_MyoG_053.nd2	1300.19		73.4267	73.4267
36	GFP hi_mouse3_MyoG_053.nd2	1311.51		84.7467	84.7467
37	GFP hi_mouse3_MyoG_054.nd2	1254.81	1160.16	94.6467	94.6467
38	GFP hi_mouse3_MyoG_054.nd2	1209.59		49.4267	49.4267
39	GFP hi_mouse3_MyoG_054.nd2	1177.87		17.7067	17.7067
40	GFP hi_mouse3_MyoG_054.nd2	1210.31		50.1467	50.1467
41	GFP hi_mouse3_MyoG_054.nd2	1274.86		114.697	114.697
42	GFP hi_mouse3_MyoG_054.nd2	1320.43		160.267	160.267
43	GFP hi_mouse3_MyoG_054.nd2	1224.76		64.5967	64.5967
44	GFP hi_mouse3_MyoG_054.nd2	1300.09		139.927	139.927
45	GFP hi_mouse3_MyoG_054.nd2	1276.27		116.107	116.107
46	GFP hi_mouse3_MyoG_054.nd2	1151.08		-9.08333	0
47	GFP hi_mouse3_MyoG_055.nd2	1413.28	1202.5	210.777	210.777
48	GFP hi_mouse3_MyoG_055.nd2	1296.23		93.7267	93.7267
49	GFP hi_mouse3_MyoG_055.nd2	1429		226.497	226.497
50	GFP hi_mouse3_MyoG_055.nd2	1426.8		224.297	224.297
51	GFP hi_mouse3_MyoG_055.nd2	1347.32		144.817	144.817
52	GFP hi_mouse3_MyoG_055.nd2	1371.36		168.857	168.857
53	GFP hi_mouse3_MyoG_055.nd2	1356.57		154.067	154.067
54	GFP hi_mouse3_MyoG_055.nd2	1261.23		58.7267	58.7267
55	GFP hi_mouse3_MyoG_055.nd2	1178.85		-23.6533	0
56	GFP hi_mouse3_MyoG_055.nd2	1222.47		19.9667	19.9667
57	GFP hi_mouse3_MyoG_055.nd2	1285.22		82.7167	82.7167
58	GFP hi_mouse3_MyoG_055.nd2	1228.17		25.6667	25.6667
59	GFP hi_mouse3_MyoG_055.nd2	1179.07		-23.4333	0
60	GFP hi_mouse3_MyoG_055.nd2	1082.28		-120.223	0
61	GFP hi_mouse3_MyoG_055.nd2	1164.99		-37.5133	0
62	GFP hi_mouse3_MyoG_055.nd2	1256.71		54.2067	54.2067
63	GFP hi_mouse3_MyoG_055.nd2	1046.3		-156.203	0
64	GFP hi_mouse3_MyoG_055.nd2	1392.45		189.947	189.947
65	GFP hi_mouse3_MyoG_055.nd2	1117.62		-84.8833	0
66	GFP hi_mouse3_MyoG_056.nd2	1402.36	1221.88	180.483	180.483
67	GFP hi_mouse3_MyoG_056.nd2	1539.01		317.133	317.133
68	GFP hi_mouse3_MyoG_056.nd2	1228.72		6.84333	6.84333
69	GFP hi_mouse3_MyoG_056.nd2	1305.5		83.6233	83.6233
70	GFP hi_mouse3_MyoG_056.nd2	1304.51		82.6333	82.6333
71	GFP hi_mouse3_MyoG_056.nd2	1094.75		-127.127	0
72	GFP hi_mouse3_MyoG_056.nd2	1181.24		-40.6367	0
73	GFP hi_mouse3_MyoG_057.nd2	1261.47	1170.92	90.5467	90.5467
74	GFP hi_mouse3_MyoG_057.nd2	1488.62		317.697	317.697
75	GFP hi_mouse3_MyoG_057.nd2	1248.63		77.7067	77.7067
76	GFP hi_mouse3_MyoG_057.nd2	1174.28		3.35667	3.35667
77	GFP hi_mouse3_MyoG_057.nd2	1163.75		-7.17333	0
78	GFP hi_mouse3_MyoG_057.nd2	1293.58		122.657	122.657
79	GFP hi_mouse3_MyoG_057.nd2	1264.54		93.6167	93.6167
80	GFP hi_mouse3_MyoG_057.nd2	1240.85		69.9267	69.9267
81	GFP hi_mouse3_MyoG_057.nd2	1242.7		71.7767	71.7767
82	GFP hi_mouse3_MyoG_057.nd2	1089.92		-81.0033	0
83	GFP hi_mouse3_MyoG_057.nd2	1101.45		-69.4733	0
84	GFP hi_mouse3_MyoG_057.nd2	1195.22		24.2967	24.2967
85	GFP hi_mouse3_MyoG_057.nd2	1282		111.077	111.077
86	GFP hi_mouse3_MyoG_057.nd2	1292.1		121.177	121.177
87	GFP hi_mouse3_MyoG_057.nd2	1103.41		-67.5133	0
88	GFP hi_mouse3_MyoG_057.nd2	1126.84		-44.0833	0
89	GFP hi_mouse3_MyoG_058.nd2	1520.11	1276.95	243.163	243.163
90	GFP hi_mouse3_MyoG_058.nd2	1286.04		9.09333	9.09333
91	GFP hi_mouse3_MyoG_058.nd2	1335.92		58.9733	58.9733
92	GFP hi_mouse3_MyoG_058.nd2	1365.48		88.5333	88.5333
93	GFP hi_mouse3_MyoG_058.nd2	1269.06		-7.88667	0
94	GFP hi_mouse3_MyoG_058.nd2	1216.31		-60.6367	0
95	GFP hi_mouse3_MyoG_058.nd2	1299.99		23.0433	23.0433
96	GFP hi_mouse3_MyoG_058.nd2	1572.94		295.993	295.993
97	GFP hi_mouse3_MyoG_058.nd2	1349.66		72.7133	72.7133
98	GFP hi_mouse3_MyoG_058.nd2	1309.76		32.8133	32.8133
99	GFP hi_mouse3_MyoG_058.nd2	1436.63		159.683	159.683
100	GFP hi_mouse3_MyoG_058.nd2	1344.68		67.7333	67.7333
101	GFP hi_mouse3_MyoG_058.nd2	1259.72		-17.2267	0
102	GFP hi_mouse3_MyoG_058.nd2	1349.04		72.0933	72.0933
103	GFP hi_mouse3_MyoG_058.nd2	1268.37		-8.57667	0
104	GFP hi_mouse3_MyoG_058.nd2	1203.53		-73.4167	0
105	GFP hi_mouse3_MyoG_058.nd2	1074.46		-202.487	0
106	GFP hi_mouse3_MyoG_058.nd2	1486.94		209.993	209.993
107	GFP hi_mouse3_MyoG_058.nd2	1323.2		46.2533	46.2533
108	GFP hi_mouse3_MyoG_059.nd2	1431.88	1219.59	212.287	212.287
109	GFP hi_mouse3_MyoG_059.nd2	1514.33		294.737	294.737
110	GFP hi_mouse3_MyoG_059.nd2	1306.27		86.6767	86.6767
111	GFP hi_mouse3_MyoG_059.nd2	1344.28		124.687	124.687
112	GFP hi_mouse3_MyoG_059.nd2	1485.66		266.067	266.067
113	GFP hi_mouse3_MyoG_059.nd2	1371.48		151.887	151.887
114	GFP hi_mouse3_MyoG_059.nd2	1304.91		85.3167	85.3167
115	GFP hi_mouse3_MyoG_059.nd2	1227.51		7.91667	7.91667
116	GFP hi_mouse3_MyoG_059.nd2	1272.78		53.1867	53.1867
117	GFP hi_mouse3_MyoG_059.nd2	1179.46		-40.1333	0
118	GFP hi_mouse3_MyoG_059.nd2	1255.66		36.0667	36.0667
119	GFP hi_mouse3_MyoG_059.nd2	1307.39		87.7967	87.7967
120	GFP hi_mouse3_MyoG_059.nd2	1300.83		81.2367	81.2367
121	GFP hi_mouse3_MyoG_059.nd2	1249.18		29.5867	29.5867
122	GFP hi_mouse3_MyoG_059.nd2	1403.6		184.007	184.007
123	GFP hi_mouse3_MyoG_060.nd2	1343.75	1190.57	153.18	153.18
124	GFP hi_mouse3_MyoG_060.nd2	1529.52		338.95	338.95
125	GFP hi_mouse3_MyoG_060.nd2	1445.4		254.83	254.83
126	GFP hi_mouse3_MyoG_060.nd2	1412.9		222.33	222.33
127	GFP hi_mouse3_MyoG_060.nd2	1192.15		1.58	1.58
128	GFP hi_mouse3_MyoG_060.nd2	1211.73		21.16	21.16
129	GFP hi_mouse3_MyoG_060.nd2	1291.01		100.44	100.44
130	GFP hi_mouse3_MyoG_060.nd2	1267.65		77.08	77.08
131	GFP hi_mouse3_MyoG_060.nd2	1231.49		40.92	40.92
132	GFP hi_mouse3_MyoG_060.nd2	1256.01		65.44	65.44
133	GFP hi_mouse3_MyoG_060.nd2	1307.68		117.11	117.11
134	GFP hi_mouse3_MyoG_060.nd2	1471.41		280.84	280.84
135	GFP hi_mouse3_MyoG_060.nd2	1295.5		104.93	104.93
136	GFP hi_mouse3_MyoG_060.nd2	1261.13		70.56	70.56
137	GFP hi_mouse3_MyoG_060.nd2	1048.15		-142.42	0
138	GFP hi_mouse3_MyoG_061.nd2	1161.68	1177.21	-15.53	0
139	GFP hi_mouse3_MyoG_061.nd2	1317.47		140.26	140.26
140	GFP hi_mouse3_MyoG_061.nd2	1253.33		76.12	76.12
141	GFP hi_mouse3_MyoG_061.nd2	1362.33		185.12	185.12
142	GFP hi_mouse3_MyoG_061.nd2	1271.17		93.96	93.96
143	GFP hi_mouse3_MyoG_061.nd2	1444.35		267.14	267.14
144	GFP hi_mouse3_MyoG_061.nd2	1258.19		80.98	80.98
145	GFP hi_mouse3_MyoG_061.nd2	1221.14		43.93	43.93
146	GFP hi_mouse3_MyoG_061.nd2	1141.05		-36.16	0
147	GFP hi_mouse3_MyoG_061.nd2	1123.06		-54.15	0
148	GFP hi_mouse3_MyoG_062.nd2	1408.4	1221.2	187.203	187.203
149	GFP hi_mouse3_MyoG_062.nd2	1361.52		140.323	140.323
150	GFP hi_mouse3_MyoG_062.nd2	1363.21		142.013	142.013
151	GFP hi_mouse3_MyoG_062.nd2	1307.49		86.2933	86.2933
152	GFP hi_mouse3_MyoG_062.nd2	1447.73		226.533	226.533
153	GFP hi_mouse3_MyoG_062.nd2	1315.2		94.0033	94.0033
154	GFP hi_mouse3_MyoG_062.nd2	1322.18		100.983	100.983
155	GFP hi_mouse3_MyoG_062.nd2	1247.75		26.5533	26.5533
156	GFP hi_mouse3_MyoG_062.nd2	1441		219.803	219.803
157	GFP hi_mouse3_MyoG_062.nd2	1236.18		14.9833	14.9833
158	GFP hi_mouse3_MyoG_062.nd2	1071.56		-149.637	0
159	GFP hi_mouse3_MyoG_063.nd2	1408.32	1251.81	156.513	156.513
160	GFP hi_mouse3_MyoG_063.nd2	1254.82		3.01333	3.01333
161	GFP hi_mouse3_MyoG_063.nd2	1486.69		234.883	234.883
162	GFP hi_mouse3_MyoG_063.nd2	1304.91		53.1033	53.1033
163	GFP hi_mouse3_MyoG_063.nd2	1333.2		81.3933	81.3933
164	GFP hi_mouse3_MyoG_063.nd2	1162.03		-89.7767	0
165	GFP hi_mouse3_MyoG_064.nd2	1095.7	1225.93	-130.23	0
166	GFP hi_mouse3_MyoG_064.nd2	1351.49		125.56	125.56
167	GFP hi_mouse3_MyoG_064.nd2	971.18		-254.75	0
168	GFP hi_mouse3_MyoG_064.nd2	1267.34		41.41	41.41
169	GFP hi_mouse3_MyoG_064.nd2	1251.08		25.15	25.15
170	GFP hi_mouse3_MyoG_064.nd2	1322.46		96.53	96.53
171	GFP hi_mouse3_MyoG_064.nd2	1224.31		-1.62	0
172	GFP hi_mouse3_MyoG_064.nd2	1337.68		111.75	111.75
173	GFP hi_mouse3_MyoG_064.nd2	1419.82		193.89	193.89
174	GFP hi_mouse3_MyoG_064.nd2	1540.5		314.57	314.57

## Sheet: Med GFP_mouse3
Item	Source	MyoG (TxRed) mean intensity	TxRed background	MyoG mean intensity	Corrected minus to zeros
1	GFP med_mouse3_MyoG_041.nd2	1256.7	1083.16	173.54	173.54
2	GFP med_mouse3_MyoG_041.nd2	1258.82		175.66	175.66
3	GFP med_mouse3_MyoG_041.nd2	1198.98		115.82	115.82
4	GFP med_mouse3_MyoG_041.nd2	1487.13		403.97	403.97
5	GFP med_mouse3_MyoG_041.nd2	1314.13		230.97	230.97
6	GFP med_mouse3_MyoG_041.nd2	1170.23		87.07	87.07
7	GFP med_mouse3_MyoG_041.nd2	1206.7		123.54	123.54
8	GFP med_mouse3_MyoG_041.nd2	1043.64		-39.52	0
9	GFP med_mouse3_MyoG_041.nd2	1095.97		12.81	12.81
10	GFP med_mouse3_MyoG_041.nd2	1056.44		-26.72	0
11	GFP med_mouse3_MyoG_041.nd2	1228.07		144.91	144.91
12	GFP med_mouse3_MyoG_041.nd2	1258.93		175.77	175.77
13	GFP med_mouse3_MyoG_041.nd2	1011.81		-71.35	0
14	GFP med_mouse3_MyoG_042.nd2	1340.79	1067.53	273.263	273.263
15	GFP med_mouse3_MyoG_042.nd2	1349.37		281.843	281.843
16	GFP med_mouse3_MyoG_042.nd2	1133.63		66.1033	66.1033
17	GFP med_mouse3_MyoG_042.nd2	1060.73		-6.79667	0
18	GFP med_mouse3_MyoG_042.nd2	1000.69		-66.8367	0
19	GFP med_mouse3_MyoG_042.nd2	1103.51		35.9833	35.9833
20	GFP med_mouse3_MyoG_042.nd2	1328.7		261.173	261.173
21	GFP med_mouse3_MyoG_042.nd2	1247.73		180.203	180.203
22	GFP med_mouse3_MyoG_042.nd2	1095.96		28.4333	28.4333
23	GFP med_mouse3_MyoG_042.nd2	1201.29		133.763	133.763
24	GFP med_mouse3_MyoG_042.nd2	1233.02		165.493	165.493
25	GFP med_mouse3_MyoG_042.nd2	1128.88		61.3533	61.3533
26	GFP med_mouse3_MyoG_042.nd2	1210.5		142.973	142.973
27	GFP med_mouse3_MyoG_042.nd2	1270.42		202.893	202.893
28	GFP med_mouse3_MyoG_042.nd2	1122.76		55.2333	55.2333
29	GFP med_mouse3_MyoG_042.nd2	1016.44		-51.0867	0
30	GFP med_mouse3_MyoG_043.nd2	1314.25	1121.95	192.303	192.303
31	GFP med_mouse3_MyoG_043.nd2	1333.04		211.093	211.093
32	GFP med_mouse3_MyoG_043.nd2	1350.14		228.193	228.193
33	GFP med_mouse3_MyoG_043.nd2	1161.89		39.9433	39.9433
34	GFP med_mouse3_MyoG_043.nd2	1214.69		92.7433	92.7433
35	GFP med_mouse3_MyoG_043.nd2	1162.28		40.3333	40.3333
36	GFP med_mouse3_MyoG_043.nd2	1238.95		117.003	117.003
37	GFP med_mouse3_MyoG_043.nd2	1323.47		201.523	201.523
38	GFP med_mouse3_MyoG_043.nd2	1240.51		118.563	118.563
39	GFP med_mouse3_MyoG_043.nd2	1246.31		124.363	124.363
40	GFP med_mouse3_MyoG_044.nd2	1334.29	1141.25	193.043	193.043
41	GFP med_mouse3_MyoG_044.nd2	1337.95		196.703	196.703
42	GFP med_mouse3_MyoG_044.nd2	1274.95		133.703	133.703
43	GFP med_mouse3_MyoG_044.nd2	1195.29		54.0433	54.0433
44	GFP med_mouse3_MyoG_044.nd2	1173.24		31.9933	31.9933
45	GFP med_mouse3_MyoG_044.nd2	1196.25		55.0033	55.0033
46	GFP med_mouse3_MyoG_044.nd2	1194.38		53.1333	53.1333
47	GFP med_mouse3_MyoG_044.nd2	1179.72		38.4733	38.4733
48	GFP med_mouse3_MyoG_044.nd2	1195.29		54.0433	54.0433
49	GFP med_mouse3_MyoG_044.nd2	1167.33		26.0833	26.0833
50	GFP med_mouse3_MyoG_045.nd2	1451.14	1184.46	266.68	266.68
51	GFP med_mouse3_MyoG_045.nd2	1460.62		276.16	276.16
52	GFP med_mouse3_MyoG_045.nd2	1258.52		74.06	74.06
53	GFP med_mouse3_MyoG_045.nd2	1274.89		90.43	90.43
54	GFP med_mouse3_MyoG_045.nd2	1168.52		-15.94	0
55	GFP med_mouse3_MyoG_045.nd2	1268.5		84.04	84.04
56	GFP med_mouse3_MyoG_045.nd2	1126.47		-57.99	0
57	GFP med_mouse3_MyoG_045.nd2	1303.67		119.21	119.21
58	GFP med_mouse3_MyoG_045.nd2	1147.52		-36.94	0
59	GFP med_mouse3_MyoG_045.nd2	1288.59		104.13	104.13
60	GFP med_mouse3_MyoG_046.nd2	1494.96	1224.43	270.527	270.527
61	GFP med_mouse3_MyoG_046.nd2	1344.72		120.287	120.287
62	GFP med_mouse3_MyoG_046.nd2	1286.76		62.3267	62.3267
63	GFP med_mouse3_MyoG_046.nd2	1234.2		9.76667	9.76667
64	GFP med_mouse3_MyoG_046.nd2	1206.76		-17.6733	0
65	GFP med_mouse3_MyoG_047.nd2	1622.71	1188.73	433.98	433.98
66	GFP med_mouse3_MyoG_047.nd2	1641.15		452.42	452.42
67	GFP med_mouse3_MyoG_047.nd2	1330.2		141.47	141.47
68	GFP med_mouse3_MyoG_047.nd2	1167.75		-20.98	0
69	GFP med_mouse3_MyoG_047.nd2	1311.12		122.39	122.39
70	GFP med_mouse3_MyoG_047.nd2	1322.38		133.65	133.65
71	GFP med_mouse3_MyoG_047.nd2	1206.46		17.73	17.73
72	GFP med_mouse3_MyoG_047.nd2	1195.4		6.67	6.67
73	GFP med_mouse3_MyoG_047.nd2	1085.01		-103.72	0
74	GFP med_mouse3_MyoG_048.nd2	1401.21	1139.14	262.067	262.067
75	GFP med_mouse3_MyoG_048.nd2	1290.72		151.577	151.577
76	GFP med_mouse3_MyoG_048.nd2	1162.73		23.5867	23.5867
77	GFP med_mouse3_MyoG_048.nd2	1175.86		36.7167	36.7167
78	GFP med_mouse3_MyoG_048.nd2	1214.37		75.2267	75.2267
79	GFP med_mouse3_MyoG_048.nd2	1242.44		103.297	103.297
80	GFP med_mouse3_MyoG_048.nd2	1150.83		11.6867	11.6867
81	GFP med_mouse3_MyoG_048.nd2	1435.01		295.867	295.867
82	GFP med_mouse3_MyoG_048.nd2	1190.09		50.9467	50.9467
83	GFP med_mouse3_MyoG_048.nd2	1331.02		191.877	191.877
84	GFP med_mouse3_MyoG_048.nd2	1183.05		43.9067	43.9067
85	GFP med_mouse3_MyoG_048.nd2	1174.3		35.1567	35.1567
86	GFP med_mouse3_MyoG_048.nd2	1222.84		83.6967	83.6967
87	GFP med_mouse3_MyoG_048.nd2	1026.26		-112.883	0
88	GFP med_mouse3_MyoG_049.nd2	1336.15	1155.21	180.94	180.94
89	GFP med_mouse3_MyoG_049.nd2	1370.1		214.89	214.89
90	GFP med_mouse3_MyoG_049.nd2	1302.18		146.97	146.97
91	GFP med_mouse3_MyoG_049.nd2	1134.65		-20.56	0
92	GFP med_mouse3_MyoG_049.nd2	916.35		-238.86	0
93	GFP med_mouse3_MyoG_049.nd2	1078.85		-76.36	0
94	GFP med_mouse3_MyoG_049.nd2	1180.59		25.38	25.38
95	GFP med_mouse3_MyoG_049.nd2	1312.96		157.75	157.75
96	GFP med_mouse3_MyoG_049.nd2	1370.73		215.52	215.52
97	GFP med_mouse3_MyoG_049.nd2	1264.53		109.32	109.32
98	GFP med_mouse3_MyoG_049.nd2	1384.29		229.08	229.08
99	GFP med_mouse3_MyoG_049.nd2	1375.43		220.22	220.22
100	GFP med_mouse3_MyoG_049.nd2	1279		123.79	123.79
101	GFP med_mouse3_MyoG_049.nd2	1128.78		-26.43	0
102	GFP med_mouse3_MyoG_049.nd2	1198.57		43.36	43.36
103	GFP med_mouse3_MyoG_049.nd2	1232.5		77.29	77.29
104	GFP med_mouse3_MyoG_049.nd2	1249.72		94.51	94.51
105	GFP med_mouse3_MyoG_050.nd2	1289.75	1128.67	161.08	161.08
106	GFP med_mouse3_MyoG_050.nd2	1270.68		142.01	142.01
107	GFP med_mouse3_MyoG_050.nd2	1048.52		-80.15	0
108	GFP med_mouse3_MyoG_050.nd2	1211.22		82.55	82.55
109	GFP med_mouse3_MyoG_050.nd2	1189.99		61.32	61.32
110	GFP med_mouse3_MyoG_050.nd2	1133.81		5.14	5.14
111	GFP med_mouse3_MyoG_050.nd2	1320.32		191.65	191.65
112	GFP med_mouse3_MyoG_050.nd2	1314.45		185.78	185.78
113	GFP med_mouse3_MyoG_050.nd2	1285.31		156.64	156.64
114	GFP med_mouse3_MyoG_050.nd2	1185.63		56.96	56.96
115	GFP med_mouse3_MyoG_050.nd2	1172.64		43.97	43.97
116	GFP med_mouse3_MyoG_050.nd2	1284.39		155.72	155.72
117	GFP med_mouse3_MyoG_050.nd2	1329.76		201.09	201.09
118	GFP med_mouse3_MyoG_050.nd2	1104.17		-24.5	0
119	GFP med_mouse3_MyoG_050.nd2	1069.19		-59.48	0
120	GFP med_mouse3_MyoG_051.nd2	1340.74	1067.5	273.237	273.237
121	GFP med_mouse3_MyoG_051.nd2	1333.63		266.127	266.127
122	GFP med_mouse3_MyoG_051.nd2	1337.07		269.567	269.567
123	GFP med_mouse3_MyoG_051.nd2	1167.83		100.327	100.327
124	GFP med_mouse3_MyoG_051.nd2	1104.18		36.6767	36.6767
125	GFP med_mouse3_MyoG_051.nd2	1084.25		16.7467	16.7467
126	GFP med_mouse3_MyoG_051.nd2	1177.23		109.727	109.727
127	GFP med_mouse3_MyoG_051.nd2	1165.34		97.8367	97.8367
128	GFP med_mouse3_MyoG_051.nd2	1150.69		83.1867	83.1867
129	GFP med_mouse3_MyoG_051.nd2	1157.97		90.4667	90.4667
130	GFP med_mouse3_MyoG_051.nd2	1235.02		167.517	167.517
131	GFP med_mouse3_MyoG_051.nd2	1182.97		115.467	115.467
132	GFP med_mouse3_MyoG_051.nd2	1238.62		171.117	171.117
133	GFP med_mouse3_MyoG_051.nd2	1323.11		255.607	255.607
134	GFP med_mouse3_MyoG_052.nd2	1328.49	1127.37	201.117	201.117
135	GFP med_mouse3_MyoG_052.nd2	1299.21		171.837	171.837
136	GFP med_mouse3_MyoG_052.nd2	1263.94		136.567	136.567
137	GFP med_mouse3_MyoG_052.nd2	1336.38		209.007	209.007
138	GFP med_mouse3_MyoG_052.nd2	980.43		-146.943	0
139	GFP med_mouse3_MyoG_052.nd2	1218.06		90.6867	90.6867
140	GFP med_mouse3_MyoG_052.nd2	1170.29		42.9167	42.9167
141	GFP med_mouse3_MyoG_052.nd2	1294.37		166.997	166.997
142	GFP med_mouse3_MyoG_052.nd2	1159.7		32.3267	32.3267
143	GFP med_mouse3_MyoG_052.nd2	1193.98		66.6067	66.6067
144	GFP med_mouse3_MyoG_052.nd2	1102.85		-24.5233	0
145	GFP med_mouse3_MyoG_052.nd2	1264.7		137.327	137.327
146	GFP med_mouse3_MyoG_053.nd2	1623.5	1146.24	477.26	477.26
147	GFP med_mouse3_MyoG_053.nd2	1679.04		532.8	532.8
148	GFP med_mouse3_MyoG_053.nd2	1408.09		261.85	261.85
149	GFP med_mouse3_MyoG_053.nd2	1231.28		85.04	85.04
150	GFP med_mouse3_MyoG_053.nd2	1203.76		57.52	57.52
151	GFP med_mouse3_MyoG_053.nd2	1365.04		218.8	218.8
152	GFP med_mouse3_MyoG_053.nd2	1195.99		49.75	49.75
153	GFP med_mouse3_MyoG_053.nd2	1008.25		-137.99	0
154	GFP med_mouse3_MyoG_053.nd2	1194.34		48.1	48.1
155	GFP med_mouse3_MyoG_053.nd2	1249.12		102.88	102.88
156	GFP med_mouse3_MyoG_053.nd2	1260.76		114.52	114.52
157	GFP med_mouse3_MyoG_054.nd2	1290.46	1163.16	127.3	127.3
158	GFP med_mouse3_MyoG_054.nd2	1324.23		161.07	161.07
159	GFP med_mouse3_MyoG_054.nd2	1380.83		217.67	217.67
160	GFP med_mouse3_MyoG_054.nd2	1290.48		127.32	127.32
161	GFP med_mouse3_MyoG_054.nd2	1144.09		-19.07	0
162	GFP med_mouse3_MyoG_054.nd2	1245.64		82.48	82.48
163	GFP med_mouse3_MyoG_054.nd2	1191		27.84	27.84
164	GFP med_mouse3_MyoG_054.nd2	1272.95		109.79	109.79
165	GFP med_mouse3_MyoG_054.nd2	1267.74		104.58	104.58
166	GFP med_mouse3_MyoG_055.nd2	1423.54	1151	272.54	272.54
167	GFP med_mouse3_MyoG_055.nd2	1285.64		134.64	134.64
168	GFP med_mouse3_MyoG_055.nd2	1342.28		191.28	191.28
169	GFP med_mouse3_MyoG_055.nd2	1168.2		17.2	17.2
170	GFP med_mouse3_MyoG_055.nd2	1224.16		73.16	73.16
171	GFP med_mouse3_MyoG_055.nd2	1343.36		192.36	192.36
172	GFP med_mouse3_MyoG_055.nd2	1162.51		11.51	11.51
173	GFP med_mouse3_MyoG_055.nd2	1286.57		135.57	135.57
174	GFP med_mouse3_MyoG_055.nd2	1125.43		-25.57	0
175	GFP med_mouse3_MyoG_055.nd2	1273.44		122.44	122.44
176	GFP med_mouse3_MyoG_056.nd2	1142.7	1097.67	45.0267	45.0267
177	GFP med_mouse3_MyoG_056.nd2	1360.51		262.837	262.837
178	GFP med_mouse3_MyoG_056.nd2	1340.46		242.787	242.787
179	GFP med_mouse3_MyoG_056.nd2	1169.03		71.3567	71.3567
180	GFP med_mouse3_MyoG_057.nd2	1388.23	1234.92	153.313	153.313
181	GFP med_mouse3_MyoG_057.nd2	1515.07		280.153	280.153
182	GFP med_mouse3_MyoG_057.nd2	1281.27		46.3533	46.3533
183	GFP med_mouse3_MyoG_057.nd2	1388.19		153.273	153.273
184	GFP med_mouse3_MyoG_057.nd2	1409.2		174.283	174.283
185	GFP med_mouse3_MyoG_057.nd2	1296.65		61.7333	61.7333
186	GFP med_mouse3_MyoG_057.nd2	1150.48		-84.4367	0
187	GFP med_mouse3_MyoG_057.nd2	1249.75		14.8333	14.8333
188	GFP med_mouse3_MyoG_058.nd2	1175.74	1117.2	58.5433	58.5433
189	GFP med_mouse3_MyoG_058.nd2	1227.59		110.393	110.393
190	GFP med_mouse3_MyoG_058.nd2	1043.47		-73.7267	0
191	GFP med_mouse3_MyoG_058.nd2	1225.98		108.783	108.783
192	GFP med_mouse3_MyoG_058.nd2	1273.76		156.563	156.563
193	GFP med_mouse3_MyoG_058.nd2	1238.34		121.143	121.143
194	GFP med_mouse3_MyoG_058.nd2	1218.54		101.343	101.343
195	GFP med_mouse3_MyoG_058.nd2	1222.08		104.883	104.883
196	GFP med_mouse3_MyoG_058.nd2	1233.42		116.223	116.223
197	GFP med_mouse3_MyoG_058.nd2	1136.23		19.0333	19.0333
198	GFP med_mouse3_MyoG_059.nd2	1154.9	1058.94	95.96	95.96
199	GFP med_mouse3_MyoG_059.nd2	1015.87		-43.07	0
200	GFP med_mouse3_MyoG_059.nd2	1170.52		111.58	111.58
201	GFP med_mouse3_MyoG_059.nd2	1449.24		390.3	390.3
202	GFP med_mouse3_MyoG_059.nd2	1106.06		47.12	47.12
203	GFP med_mouse3_MyoG_059.nd2	965.57		-93.37	0
204	GFP med_mouse3_MyoG_059.nd2	1081.6		22.66	22.66
205	GFP med_mouse3_MyoG_059.nd2	1111.09		52.15	52.15
206	GFP med_mouse3_MyoG_059.nd2	1207.12		148.18	148.18
207	GFP med_mouse3_MyoG_059.nd2	1141.75		82.81	82.81
208	GFP med_mouse3_MyoG_059.nd2	1178.35		119.41	119.41
209	GFP med_mouse3_MyoG_059.nd2	1157.03		98.09	98.09
210	GFP med_mouse3_MyoG_059.nd2	1110.44		51.5	51.5
211	GFP med_mouse3_MyoG_060.nd2	1259.63	1065.98	193.65	193.65
212	GFP med_mouse3_MyoG_060.nd2	1269.92		203.94	203.94
213	GFP med_mouse3_MyoG_060.nd2	1356.59		290.61	290.61
214	GFP med_mouse3_MyoG_060.nd2	1240.05		174.07	174.07
215	GFP med_mouse3_MyoG_060.nd2	1260.03		194.05	194.05
216	GFP med_mouse3_MyoG_060.nd2	1210.57		144.59	144.59
217	GFP med_mouse3_MyoG_060.nd2	1103.62		37.64	37.64
218	GFP med_mouse3_MyoG_060.nd2	1148.8		82.82	82.82
219	GFP med_mouse3_MyoG_060.nd2	1176.44		110.46	110.46
220	GFP med_mouse3_MyoG_060.nd2	1214.34		148.36	148.36
221	GFP med_mouse3_MyoG_060.nd2	1130.69		64.71	64.71
222	GFP med_mouse3_MyoG_060.nd2	1207.65		141.67	141.67
223	GFP med_mouse3_MyoG_060.nd2	1223.43		157.45	157.45
224	GFP med_mouse3_MyoG_060.nd2	1205.87		139.89	139.89
225	GFP med_mouse3_MyoG_060.nd2	1050.31		-15.67	0
226	GFP med_mouse3_MyoG_060.nd2	1174.04		108.06	108.06
227	GFP med_mouse3_MyoG_061.nd2	1248.55	1024.99	223.557	223.557
228	GFP med_mouse3_MyoG_061.nd2	1015.1		-9.89333	0
229	GFP med_mouse3_MyoG_061.nd2	1196.38		171.387	171.387
230	GFP med_mouse3_MyoG_061.nd2	1116.85		91.8567	91.8567
231	GFP med_mouse3_MyoG_061.nd2	1071.94		46.9467	46.9467
232	GFP med_mouse3_MyoG_061.nd2	1192.86		167.867	167.867
233	GFP med_mouse3_MyoG_061.nd2	1113.39		88.3967	88.3967
234	GFP med_mouse3_MyoG_061.nd2	1083.96		58.9667	58.9667
235	GFP med_mouse3_MyoG_061.nd2	1197.03		172.037	172.037
236	GFP med_mouse3_MyoG_061.nd2	1163.02		138.027	138.027
237	GFP med_mouse3_MyoG_061.nd2	1211.27		186.277	186.277
238	GFP med_mouse3_MyoG_061.nd2	1240.18		215.187	215.187
239	GFP med_mouse3_MyoG_061.nd2	1263.87		238.877	238.877
240	GFP med_mouse3_MyoG_061.nd2	1004.47		-20.5233	0
241	GFP med_mouse3_MyoG_061.nd2	1155.96		130.967	130.967
242	GFP med_mouse3_MyoG_061.nd2	1060.24		35.2467	35.2467
243	GFP med_mouse3_MyoG_061.nd2	1195.72		170.727	170.727
244	GFP med_mouse3_MyoG_061.nd2	1150.57		125.577	125.577
245	GFP med_mouse3_MyoG_061.nd2	1198.96		173.967	173.967
246	GFP med_mouse3_MyoG_062.nd2	1381.17	1073.17	308.003	308.003
247	GFP med_mouse3_MyoG_062.nd2	1396.48		323.313	323.313
248	GFP med_mouse3_MyoG_062.nd2	1407.12		333.953	333.953
249	GFP med_mouse3_MyoG_062.nd2	1277.57		204.403	204.403
250	GFP med_mouse3_MyoG_062.nd2	1221.32		148.153	148.153
251	GFP med_mouse3_MyoG_062.nd2	1145.58		72.4133	72.4133
252	GFP med_mouse3_MyoG_062.nd2	1050.29		-22.8767	0
253	GFP med_mouse3_MyoG_062.nd2	1108.93		35.7633	35.7633
254	GFP med_mouse3_MyoG_062.nd2	1012.31		-60.8567	0
255	GFP med_mouse3_MyoG_062.nd2	1219.59		146.423	146.423
256	GFP med_mouse3_MyoG_062.nd2	1251.87		178.703	178.703
257	GFP med_mouse3_MyoG_062.nd2	1192.74		119.573	119.573
258	GFP med_mouse3_MyoG_062.nd2	1153.11		79.9433	79.9433
259	GFP med_mouse3_MyoG_062.nd2	1256.8		183.633	183.633
260	GFP med_mouse3_MyoG_062.nd2	1261.13		187.963	187.963
261	GFP med_mouse3_MyoG_063.nd2	1378.98	1118.96	260.017	260.017
262	GFP med_mouse3_MyoG_063.nd2	1369.21		250.247	250.247
263	GFP med_mouse3_MyoG_063.nd2	1338.77		219.807	219.807
264	GFP med_mouse3_MyoG_063.nd2	1470.31		351.347	351.347
265	GFP med_mouse3_MyoG_063.nd2	1231.73		112.767	112.767
266	GFP med_mouse3_MyoG_063.nd2	1213.07		94.1067	94.1067
267	GFP med_mouse3_MyoG_063.nd2	1284.78		165.817	165.817
268	GFP med_mouse3_MyoG_063.nd2	1148.9		29.9367	29.9367
269	GFP med_mouse3_MyoG_063.nd2	1169.99		51.0267	51.0267
270	GFP med_mouse3_MyoG_064.nd2	1254.87	1101.44	153.427	153.427
271	GFP med_mouse3_MyoG_064.nd2	1248.7		147.257	147.257
272	GFP med_mouse3_MyoG_064.nd2	1059.22		-42.2233	0
273	GFP med_mouse3_MyoG_064.nd2	1199.61		98.1667	98.1667
274	GFP med_mouse3_MyoG_064.nd2	1266		164.557	164.557
275	GFP med_mouse3_MyoG_064.nd2	1244.86		143.417	143.417
276	GFP med_mouse3_MyoG_064.nd2	1091.66		-9.78333	0
277	GFP med_mouse3_MyoG_064.nd2	951.87		-149.573	0
278	GFP med_mouse3_MyoG_064.nd2	1115.36		13.9167	13.9167
279	GFP med_mouse3_MyoG_064.nd2	1064.52		-36.9233	0
280	GFP med_mouse3_MyoG_064.nd2	1179.57		78.1267	78.1267
281	GFP med_mouse3_MyoG_064.nd2	1167.87		66.4267	66.4267
282	GFP med_mouse3_MyoG_064.nd2	1148.64		47.1967	47.1967

## Sheet: Low GFP_mouse3
Item	Source	MyoG (TxRed) mean intensity	TxRed background	MyoG mean intensity	Corrected minus to zeros
1	GFP lo_mouse3_MyoG_046.nd2	1310.44	1100.19	210.253	210.253
2	GFP lo_mouse3_MyoG_046.nd2	1339.48		239.293	239.293
3	GFP lo_mouse3_MyoG_046.nd2	1379.19		279.003	279.003
4	GFP lo_mouse3_MyoG_046.nd2	1237.25		137.063	137.063
5	GFP lo_mouse3_MyoG_046.nd2	1258.04		157.853	157.853
6	GFP lo_mouse3_MyoG_046.nd2	1372.16		271.973	271.973
7	GFP lo_mouse3_MyoG_046.nd2	1214.37		114.183	114.183
8	GFP lo_mouse3_MyoG_046.nd2	1425.25		325.063	325.063
9	GFP lo_mouse3_MyoG_046.nd2	1483.31		383.123	383.123
10	GFP lo_mouse3_MyoG_046.nd2	1310.04		209.853	209.853
11	GFP lo_mouse3_MyoG_046.nd2	1348.78		248.593	248.593
12	GFP lo_mouse3_MyoG_046.nd2	1293.08		192.893	192.893
13	GFP lo_mouse3_MyoG_046.nd2	1277.95		177.763	177.763
14	GFP lo_mouse3_MyoG_046.nd2	1336.48		236.293	236.293
15	GFP lo_mouse3_MyoG_046.nd2	1186.38		86.1933	86.1933
16	GFP lo_mouse3_MyoG_046.nd2	1226.09		125.903	125.903
17	GFP lo_mouse3_MyoG_046.nd2	1413.62		313.433	313.433
18	GFP lo_mouse3_MyoG_046.nd2	1261.42		161.233	161.233
19	GFP lo_mouse3_MyoG_046.nd2	1145.94		45.7533	45.7533
20	GFP lo_mouse3_MyoG_046.nd2	1021.56		-78.6267	0
21	GFP lo_mouse3_MyoG_046.nd2	1118.43		18.2433	18.2433
22	GFP lo_mouse3_MyoG_046.nd2	1335.7		235.513	235.513
23	GFP lo_mouse3_MyoG_046.nd2	1250.92		150.733	150.733
24	GFP lo_mouse3_MyoG_046.nd2	1324.86		224.673	224.673
25	GFP lo_mouse3_MyoG_046.nd2	1292.51		192.323	192.323
26	GFP lo_mouse3_MyoG_046.nd2	1265.86		165.673	165.673
27	GFP lo_mouse3_MyoG_046.nd2	1154.71		54.5233	54.5233
28	GFP lo_mouse3_MyoG_046.nd2	1064.43		-35.7567	0
29	GFP lo_mouse3_MyoG_046.nd2	1122.5		22.3133	22.3133
30	GFP lo_mouse3_MyoG_046.nd2	1152.33		52.1433	52.1433
31	GFP lo_mouse3_MyoG_046.nd2	1225.28		125.093	125.093
32	GFP lo_mouse3_MyoG_046.nd2	1156.93		56.7433	56.7433
33	GFP lo_mouse3_MyoG_047.nd2	1234.06	1164.37	69.6933	69.6933
34	GFP lo_mouse3_MyoG_047.nd2	1296.8		132.433	132.433
35	GFP lo_mouse3_MyoG_047.nd2	1444.81		280.443	280.443
36	GFP lo_mouse3_MyoG_047.nd2	974.05		-190.317	0
37	GFP lo_mouse3_MyoG_047.nd2	1180.77		16.4033	16.4033
38	GFP lo_mouse3_MyoG_047.nd2	1414.22		249.853	249.853
39	GFP lo_mouse3_MyoG_047.nd2	1356.91		192.543	192.543
40	GFP lo_mouse3_MyoG_047.nd2	1398.35		233.983	233.983
41	GFP lo_mouse3_MyoG_047.nd2	1070.98		-93.3867	0
42	GFP lo_mouse3_MyoG_047.nd2	1204.65		40.2833	40.2833
43	GFP lo_mouse3_MyoG_047.nd2	1190.05		25.6833	25.6833
44	GFP lo_mouse3_MyoG_047.nd2	1255.03		90.6633	90.6633
45	GFP lo_mouse3_MyoG_047.nd2	1193.48		29.1133	29.1133
46	GFP lo_mouse3_MyoG_047.nd2	1313.76		149.393	149.393
47	GFP lo_mouse3_MyoG_047.nd2	1250.91		86.5433	86.5433
48	GFP lo_mouse3_MyoG_047.nd2	1266.52		102.153	102.153
49	GFP lo_mouse3_MyoG_047.nd2	1407.8		243.433	243.433
50	GFP lo_mouse3_MyoG_047.nd2	1412.45		248.083	248.083
51	GFP lo_mouse3_MyoG_047.nd2	1234.09		69.7233	69.7233
52	GFP lo_mouse3_MyoG_047.nd2	1190.41		26.0433	26.0433
53	GFP lo_mouse3_MyoG_047.nd2	1297.26		132.893	132.893
54	GFP lo_mouse3_MyoG_047.nd2	1161.15		-3.21667	0
55	GFP lo_mouse3_MyoG_047.nd2	1191.48		27.1133	27.1133
56	GFP lo_mouse3_MyoG_047.nd2	1327.82		163.453	163.453
57	GFP lo_mouse3_MyoG_047.nd2	1286.93		122.563	122.563
58	GFP lo_mouse3_MyoG_047.nd2	1277.07		112.703	112.703
59	GFP lo_mouse3_MyoG_048.nd2	1333.19	1082.32	250.873	250.873
60	GFP lo_mouse3_MyoG_048.nd2	1285.96		203.643	203.643
61	GFP lo_mouse3_MyoG_048.nd2	1224.5		142.183	142.183
62	GFP lo_mouse3_MyoG_048.nd2	1346.74		264.423	264.423
63	GFP lo_mouse3_MyoG_048.nd2	1217.13		134.813	134.813
64	GFP lo_mouse3_MyoG_048.nd2	1251.2		168.883	168.883
65	GFP lo_mouse3_MyoG_048.nd2	1160.23		77.9133	77.9133
66	GFP lo_mouse3_MyoG_048.nd2	1108.76		26.4433	26.4433
67	GFP lo_mouse3_MyoG_048.nd2	1272.46		190.143	190.143
68	GFP lo_mouse3_MyoG_048.nd2	1143.5		61.1833	61.1833
69	GFP lo_mouse3_MyoG_048.nd2	1164.92		82.6033	82.6033
70	GFP lo_mouse3_MyoG_048.nd2	1130.74		48.4233	48.4233
71	GFP lo_mouse3_MyoG_049.nd2	1265.47	1073.39	192.08	192.08
72	GFP lo_mouse3_MyoG_049.nd2	1253.54		180.15	180.15
73	GFP lo_mouse3_MyoG_049.nd2	1794.81		721.42	721.42
74	GFP lo_mouse3_MyoG_049.nd2	1536.4		463.01	463.01
75	GFP lo_mouse3_MyoG_049.nd2	1359.32		285.93	285.93
76	GFP lo_mouse3_MyoG_049.nd2	1509.24		435.85	435.85
77	GFP lo_mouse3_MyoG_049.nd2	1506.53		433.14	433.14
78	GFP lo_mouse3_MyoG_049.nd2	1656.59		583.2	583.2
79	GFP lo_mouse3_MyoG_049.nd2	1301.99		228.6	228.6
80	GFP lo_mouse3_MyoG_049.nd2	1203.26		129.87	129.87
81	GFP lo_mouse3_MyoG_049.nd2	1317.14		243.75	243.75
82	GFP lo_mouse3_MyoG_049.nd2	1135.72		62.33	62.33
83	GFP lo_mouse3_MyoG_049.nd2	1186.62		113.23	113.23
84	GFP lo_mouse3_MyoG_049.nd2	1132.23		58.84	58.84
85	GFP lo_mouse3_MyoG_049.nd2	1018.23		-55.16	0
86	GFP lo_mouse3_MyoG_049.nd2	1178.66		105.27	105.27
87	GFP lo_mouse3_MyoG_049.nd2	1423.87		350.48	350.48
88	GFP lo_mouse3_MyoG_049.nd2	1403.22		329.83	329.83
89	GFP lo_mouse3_MyoG_049.nd2	1235.4		162.01	162.01
90	GFP lo_mouse3_MyoG_049.nd2	1146.12		72.73	72.73
91	GFP lo_mouse3_MyoG_049.nd2	1325.23		251.84	251.84
92	GFP lo_mouse3_MyoG_049.nd2	885.8		-187.59	0
93	GFP lo_mouse3_MyoG_050.nd2	1162	1017.26	144.737	144.737
94	GFP lo_mouse3_MyoG_050.nd2	1191.84		174.577	174.577
95	GFP lo_mouse3_MyoG_050.nd2	1242.32		225.057	225.057
96	GFP lo_mouse3_MyoG_050.nd2	1339.6		322.337	322.337
97	GFP lo_mouse3_MyoG_050.nd2	1160.31		143.047	143.047
98	GFP lo_mouse3_MyoG_050.nd2	1289.16		271.897	271.897
99	GFP lo_mouse3_MyoG_050.nd2	1239.87		222.607	222.607
100	GFP lo_mouse3_MyoG_050.nd2	1215.59		198.327	198.327
101	GFP lo_mouse3_MyoG_050.nd2	1307.91		290.647	290.647
102	GFP lo_mouse3_MyoG_050.nd2	1231.18		213.917	213.917
103	GFP lo_mouse3_MyoG_050.nd2	1229.46		212.197	212.197
104	GFP lo_mouse3_MyoG_050.nd2	1254.73		237.467	237.467
105	GFP lo_mouse3_MyoG_050.nd2	1409.9		392.637	392.637
106	GFP lo_mouse3_MyoG_050.nd2	1243.06		225.797	225.797
107	GFP lo_mouse3_MyoG_050.nd2	1173.19		155.927	155.927
108	GFP lo_mouse3_MyoG_050.nd2	1054.5		37.2367	37.2367
109	GFP lo_mouse3_MyoG_050.nd2	1065.4		48.1367	48.1367
110	GFP lo_mouse3_MyoG_050.nd2	1172.91		155.647	155.647
111	GFP lo_mouse3_MyoG_050.nd2	1203.67		186.407	186.407
112	GFP lo_mouse3_MyoG_050.nd2	1224.45		207.187	207.187
113	GFP lo_mouse3_MyoG_050.nd2	1131.52		114.257	114.257
114	GFP lo_mouse3_MyoG_050.nd2	1245.23		227.967	227.967
115	GFP lo_mouse3_MyoG_050.nd2	1088.73		71.4667	71.4667
116	GFP lo_mouse3_MyoG_050.nd2	1045.67		28.4067	28.4067
117	GFP lo_mouse3_MyoG_050.nd2	1316.67		299.407	299.407
118	GFP lo_mouse3_MyoG_050.nd2	1415.64		398.377	398.377
119	GFP lo_mouse3_MyoG_050.nd2	1131.27		114.007	114.007
120	GFP lo_mouse3_MyoG_050.nd2	1304.07		286.807	286.807
121	GFP lo_mouse3_MyoG_050.nd2	1278.57		261.307	261.307
122	GFP lo_mouse3_MyoG_050.nd2	1079.98		62.7167	62.7167
123	GFP lo_mouse3_MyoG_050.nd2	951.83		-65.4333	0
124	GFP lo_mouse3_MyoG_050.nd2	1065.65		48.3867	48.3867
125	GFP lo_mouse3_MyoG_051.nd2	1124.77	1075.78	48.9867	48.9867
126	GFP lo_mouse3_MyoG_051.nd2	1339.78		263.997	263.997
127	GFP lo_mouse3_MyoG_051.nd2	1151.89		76.1067	76.1067
128	GFP lo_mouse3_MyoG_051.nd2	1237.96		162.177	162.177
129	GFP lo_mouse3_MyoG_051.nd2	1273.53		197.747	197.747
130	GFP lo_mouse3_MyoG_051.nd2	1129.53		53.7467	53.7467
131	GFP lo_mouse3_MyoG_051.nd2	1076.03		0.246667	0.246667
132	GFP lo_mouse3_MyoG_051.nd2	1223.7		147.917	147.917
133	GFP lo_mouse3_MyoG_051.nd2	1292.13		216.347	216.347
134	GFP lo_mouse3_MyoG_051.nd2	1150.85		75.0667	75.0667
135	GFP lo_mouse3_MyoG_051.nd2	1158.51		82.7267	82.7267
136	GFP lo_mouse3_MyoG_051.nd2	1063.32		-12.4633	0
137	GFP lo_mouse3_MyoG_052.nd2	1439.94	1125.89	314.053	314.053
138	GFP lo_mouse3_MyoG_052.nd2	1365.28		239.393	239.393
139	GFP lo_mouse3_MyoG_052.nd2	1193.23		67.3433	67.3433
140	GFP lo_mouse3_MyoG_052.nd2	1174		48.1133	48.1133
141	GFP lo_mouse3_MyoG_052.nd2	1256.32		130.433	130.433
142	GFP lo_mouse3_MyoG_052.nd2	1164.66		38.7733	38.7733
143	GFP lo_mouse3_MyoG_052.nd2	1227.62		101.733	101.733
144	GFP lo_mouse3_MyoG_052.nd2	1100.18		-25.7067	0
145	GFP lo_mouse3_MyoG_052.nd2	1240.91		115.023	115.023
146	GFP lo_mouse3_MyoG_052.nd2	1055.82		-70.0667	0
147	GFP lo_mouse3_MyoG_052.nd2	1247.84		121.953	121.953
148	GFP lo_mouse3_MyoG_052.nd2	1182.6		56.7133	56.7133
149	GFP lo_mouse3_MyoG_052.nd2	1255.54		129.653	129.653
150	GFP lo_mouse3_MyoG_052.nd2	1179.63		53.7433	53.7433
151	GFP lo_mouse3_MyoG_052.nd2	1199.84		73.9533	73.9533
152	GFP lo_mouse3_MyoG_052.nd2	1457.14		331.253	331.253
153	GFP lo_mouse3_MyoG_052.nd2	1022.84		-103.047	0
154	GFP lo_mouse3_MyoG_052.nd2	1175.62		49.7333	49.7333
155	GFP lo_mouse3_MyoG_052.nd2	962.13		-163.757	0
156	GFP lo_mouse3_MyoG_053.nd2	1485.07	1094.72	390.347	390.347
157	GFP lo_mouse3_MyoG_053.nd2	1330.22		235.497	235.497
158	GFP lo_mouse3_MyoG_053.nd2	1289.73		195.007	195.007
159	GFP lo_mouse3_MyoG_053.nd2	1329.48		234.757	234.757
160	GFP lo_mouse3_MyoG_053.nd2	1217.41		122.687	122.687
161	GFP lo_mouse3_MyoG_053.nd2	1262.31		167.587	167.587
162	GFP lo_mouse3_MyoG_053.nd2	1193.24		98.5167	98.5167
163	GFP lo_mouse3_MyoG_053.nd2	1241.56		146.837	146.837
164	GFP lo_mouse3_MyoG_053.nd2	1003.09		-91.6333	0
165	GFP lo_mouse3_MyoG_053.nd2	975.17		-119.553	0
166	GFP lo_mouse3_MyoG_054.nd2	1226.9	1136.59	90.3133	90.3133
167	GFP lo_mouse3_MyoG_054.nd2	1480.4		343.813	343.813
168	GFP lo_mouse3_MyoG_054.nd2	1177.5		40.9133	40.9133
169	GFP lo_mouse3_MyoG_054.nd2	1213		76.4133	76.4133
170	GFP lo_mouse3_MyoG_054.nd2	1190.92		54.3333	54.3333
171	GFP lo_mouse3_MyoG_054.nd2	1506.18		369.593	369.593
172	GFP lo_mouse3_MyoG_055.nd2	1262.17	1136.33	125.837	125.837
173	GFP lo_mouse3_MyoG_055.nd2	1337.51		201.177	201.177
174	GFP lo_mouse3_MyoG_055.nd2	1246.29		109.957	109.957
175	GFP lo_mouse3_MyoG_055.nd2	1451.9		315.567	315.567
176	GFP lo_mouse3_MyoG_055.nd2	1390.93		254.597	254.597
177	GFP lo_mouse3_MyoG_055.nd2	1331.71		195.377	195.377
178	GFP lo_mouse3_MyoG_055.nd2	1369.01		232.677	232.677
179	GFP lo_mouse3_MyoG_055.nd2	1159.1		22.7667	22.7667
180	GFP lo_mouse3_MyoG_055.nd2	1219.52		83.1867	83.1867
181	GFP lo_mouse3_MyoG_055.nd2	1236.61		100.277	100.277
182	GFP lo_mouse3_MyoG_055.nd2	1145.15		8.81667	8.81667
183	GFP lo_mouse3_MyoG_055.nd2	1253.43		117.097	117.097
184	GFP lo_mouse3_MyoG_055.nd2	1288.46		152.127	152.127
185	GFP lo_mouse3_MyoG_055.nd2	1297.31		160.977	160.977
186	GFP lo_mouse3_MyoG_055.nd2	1173.45		37.1167	37.1167
187	GFP lo_mouse3_MyoG_055.nd2	958.68		-177.653	0
188	GFP lo_mouse3_MyoG_056.nd2	1283.16	1061.62	221.54	221.54
189	GFP lo_mouse3_MyoG_056.nd2	1191.38		129.76	129.76
190	GFP lo_mouse3_MyoG_056.nd2	1313.92		252.3	252.3
191	GFP lo_mouse3_MyoG_056.nd2	1483.24		421.62	421.62
192	GFP lo_mouse3_MyoG_056.nd2	1502.82		441.2	441.2
193	GFP lo_mouse3_MyoG_056.nd2	1280.19		218.57	218.57
194	GFP lo_mouse3_MyoG_056.nd2	1260.55		198.93	198.93
195	GFP lo_mouse3_MyoG_056.nd2	1085.65		24.03	24.03
196	GFP lo_mouse3_MyoG_056.nd2	1122.88		61.26	61.26
197	GFP lo_mouse3_MyoG_056.nd2	1097.68		36.06	36.06
198	GFP lo_mouse3_MyoG_056.nd2	1202.31		140.69	140.69
199	GFP lo_mouse3_MyoG_056.nd2	1144.9		83.28	83.28
200	GFP lo_mouse3_MyoG_056.nd2	1047.07		-14.55	0
201	GFP lo_mouse3_MyoG_056.nd2	1195.21		133.59	133.59
202	GFP lo_mouse3_MyoG_056.nd2	1143.1		81.48	81.48
203	GFP lo_mouse3_MyoG_056.nd2	1356.73		295.11	295.11
204	GFP lo_mouse3_MyoG_056.nd2	1366.02		304.4	304.4
205	GFP lo_mouse3_MyoG_056.nd2	1304.42		242.8	242.8
206	GFP lo_mouse3_MyoG_056.nd2	1277.33		215.71	215.71
207	GFP lo_mouse3_MyoG_056.nd2	1011.92		-49.7	0
208	GFP lo_mouse3_MyoG_056.nd2	1110.07		48.45	48.45
209	GFP lo_mouse3_MyoG_056.nd2	1074.88		13.26	13.26
210	GFP lo_mouse3_MyoG_057.nd2	1465.86	1062.27	403.587	403.587
211	GFP lo_mouse3_MyoG_057.nd2	1543.68		481.407	481.407
212	GFP lo_mouse3_MyoG_057.nd2	1233.37		171.097	171.097
213	GFP lo_mouse3_MyoG_057.nd2	1218.49		156.217	156.217
214	GFP lo_mouse3_MyoG_057.nd2	1194.61		132.337	132.337
215	GFP lo_mouse3_MyoG_057.nd2	1157.26		94.9867	94.9867
216	GFP lo_mouse3_MyoG_057.nd2	1092.7		30.4267	30.4267
217	GFP lo_mouse3_MyoG_057.nd2	1323		260.727	260.727
218	GFP lo_mouse3_MyoG_057.nd2	1369.35		307.077	307.077
219	GFP lo_mouse3_MyoG_057.nd2	1282.32		220.047	220.047
220	GFP lo_mouse3_MyoG_057.nd2	1174.84		112.567	112.567
221	GFP lo_mouse3_MyoG_057.nd2	1043.46		-18.8133	0
222	GFP lo_mouse3_MyoG_057.nd2	1197.47		135.197	135.197
223	GFP lo_mouse3_MyoG_057.nd2	1103.87		41.5967	41.5967
224	GFP lo_mouse3_MyoG_057.nd2	1278.65		216.377	216.377
225	GFP lo_mouse3_MyoG_057.nd2	1279.23		216.957	216.957
226	GFP lo_mouse3_MyoG_057.nd2	1411.69		349.417	349.417
227	GFP lo_mouse3_MyoG_057.nd2	1459.11		396.837	396.837
228	GFP lo_mouse3_MyoG_057.nd2	1255.25		192.977	192.977
229	GFP lo_mouse3_MyoG_057.nd2	1356.61		294.337	294.337
230	GFP lo_mouse3_MyoG_057.nd2	1235.55		173.277	173.277
231	GFP lo_mouse3_MyoG_057.nd2	1151.4		89.1267	89.1267
232	GFP lo_mouse3_MyoG_057.nd2	995.89		-66.3833	0
233	GFP lo_mouse3_MyoG_057.nd2	954.43		-107.843	0
234	GFP lo_mouse3_MyoG_057.nd2	978.83		-83.4433	0
235	GFP lo_mouse3_MyoG_057.nd2	1253.32		191.047	191.047
236	GFP lo_mouse3_MyoG_057.nd2	1312.11		249.837	249.837
237	GFP lo_mouse3_MyoG_057.nd2	1403.75		341.477	341.477
238	GFP lo_mouse3_MyoG_057.nd2	1303.86		241.587	241.587
239	GFP lo_mouse3_MyoG_057.nd2	1066.61		4.33667	4.33667
240	GFP lo_mouse3_MyoG_057.nd2	1189.59		127.317	127.317
241	GFP lo_mouse3_MyoG_057.nd2	1144.78		82.5067	82.5067
242	GFP lo_mouse3_MyoG_058.nd2	1431.25	1049.7	381.547	381.547
243	GFP lo_mouse3_MyoG_058.nd2	1422.32		372.617	372.617
244	GFP lo_mouse3_MyoG_058.nd2	1138.36		88.6567	88.6567
245	GFP lo_mouse3_MyoG_058.nd2	1166.6		116.897	116.897
246	GFP lo_mouse3_MyoG_058.nd2	1254.8		205.097	205.097
247	GFP lo_mouse3_MyoG_058.nd2	1098.17		48.4667	48.4667
248	GFP lo_mouse3_MyoG_058.nd2	1218.14		168.437	168.437
249	GFP lo_mouse3_MyoG_058.nd2	1296.21		246.507	246.507
250	GFP lo_mouse3_MyoG_058.nd2	1156.53		106.827	106.827
251	GFP lo_mouse3_MyoG_058.nd2	1069.16		19.4567	19.4567
252	GFP lo_mouse3_MyoG_058.nd2	1216.1		166.397	166.397
253	GFP lo_mouse3_MyoG_058.nd2	1126.96		77.2567	77.2567
254	GFP lo_mouse3_MyoG_058.nd2	1392.88		343.177	343.177
255	GFP lo_mouse3_MyoG_058.nd2	984.46		-65.2433	0
256	GFP lo_mouse3_MyoG_058.nd2	1541.34		491.637	491.637
257	GFP lo_mouse3_MyoG_058.nd2	1306.47		256.767	256.767
258	GFP lo_mouse3_MyoG_058.nd2	1029.23		-20.4733	0
259	GFP lo_mouse3_MyoG_058.nd2	1135.87		86.1667	86.1667
260	GFP lo_mouse3_MyoG_058.nd2	934.86		-114.843	0
261	GFP lo_mouse3_MyoG_058.nd2	1255.84		206.137	206.137
262	GFP lo_mouse3_MyoG_058.nd2	1142.23		92.5267	92.5267
263	GFP lo_mouse3_MyoG_058.nd2	1210.82		161.117	161.117
264	GFP lo_mouse3_MyoG_058.nd2	1655.83		606.127	606.127
265	GFP lo_mouse3_MyoG_058.nd2	1534.57		484.867	484.867
266	GFP lo_mouse3_MyoG_058.nd2	1150.7		100.997	100.997
267	GFP lo_mouse3_MyoG_058.nd2	1160.86		111.157	111.157
268	GFP lo_mouse3_MyoG_058.nd2	1180.95		131.247	131.247
269	GFP lo_mouse3_MyoG_058.nd2	1159.83		110.127	110.127
270	GFP lo_mouse3_MyoG_059.nd2	1402.69	1058.68	344.013	344.013
271	GFP lo_mouse3_MyoG_059.nd2	1211.18		152.503	152.503
272	GFP lo_mouse3_MyoG_059.nd2	1153.45		94.773	94.773
273	GFP lo_mouse3_MyoG_059.nd2	998.99		-59.687	0
274	GFP lo_mouse3_MyoG_059.nd2	1193.14		134.463	134.463
275	GFP lo_mouse3_MyoG_059.nd2	1160.7		102.023	102.023
276	GFP lo_mouse3_MyoG_059.nd2	1182.87		124.193	124.193
277	GFP lo_mouse3_MyoG_059.nd2	1290.97		232.293	232.293
278	GFP lo_mouse3_MyoG_059.nd2	1147.84		89.163	89.163
279	GFP lo_mouse3_MyoG_059.nd2	1060.5		1.823	1.823
280	GFP lo_mouse3_MyoG_059.nd2	1143.99		85.313	85.313
281	GFP lo_mouse3_MyoG_059.nd2	1061.44		2.763	2.763
282	GFP lo_mouse3_MyoG_059.nd2	1008.35		-50.327	0
283	GFP lo_mouse3_MyoG_059.nd2	1092.28		33.603	33.603
284	GFP lo_mouse3_MyoG_059.nd2	1070.01		11.333	11.333
285	GFP lo_mouse3_MyoG_059.nd2	1603.51		544.833	544.833
286	GFP lo_mouse3_MyoG_059.nd2	1475.15		416.473	416.473
287	GFP lo_mouse3_MyoG_059.nd2	1153.34		94.663	94.663
288	GFP lo_mouse3_MyoG_059.nd2	1287.09		228.413	228.413
289	GFP lo_mouse3_MyoG_059.nd2	1126.7		68.023	68.023
290	GFP lo_mouse3_MyoG_059.nd2	1175.67		116.993	116.993
291	GFP lo_mouse3_MyoG_059.nd2	1150.12		91.443	91.443
292	GFP lo_mouse3_MyoG_059.nd2	1206.42		147.743	147.743
293	GFP lo_mouse3_MyoG_059.nd2	1068.72		10.043	10.043
294	GFP lo_mouse3_MyoG_059.nd2	1231.73		173.053	173.053
295	GFP lo_mouse3_MyoG_059.nd2	1332.25		273.573	273.573
296	GFP lo_mouse3_MyoG_059.nd2	1890.58		831.903	831.903
297	GFP lo_mouse3_MyoG_059.nd2	1160.82		102.143	102.143
298	GFP lo_mouse3_MyoG_059.nd2	1377.98		319.303	319.303
299	GFP lo_mouse3_MyoG_059.nd2	1299.09		240.413	240.413
300	GFP lo_mouse3_MyoG_059.nd2	1300.07		241.393	241.393
301	GFP lo_mouse3_MyoG_059.nd2	1159.79		101.113	101.113
302	GFP lo_mouse3_MyoG_060.nd2	1375.28	1112.64	262.643	262.643
303	GFP lo_mouse3_MyoG_060.nd2	1358.65		246.013	246.013
304	GFP lo_mouse3_MyoG_060.nd2	1438.81		326.173	326.173
305	GFP lo_mouse3_MyoG_060.nd2	1345.23		232.593	232.593
306	GFP lo_mouse3_MyoG_060.nd2	1221.43		108.793	108.793
307	GFP lo_mouse3_MyoG_060.nd2	1267.04		154.403	154.403
308	GFP lo_mouse3_MyoG_060.nd2	1317.1		204.463	204.463
309	GFP lo_mouse3_MyoG_060.nd2	1303.19		190.553	190.553
310	GFP lo_mouse3_MyoG_060.nd2	1327.67		215.033	215.033
311	GFP lo_mouse3_MyoG_060.nd2	1334.58		221.943	221.943
312	GFP lo_mouse3_MyoG_060.nd2	1143.87		31.233	31.233
313	GFP lo_mouse3_MyoG_060.nd2	1507.76		395.123	395.123
314	GFP lo_mouse3_MyoG_060.nd2	1535.55		422.913	422.913
315	GFP lo_mouse3_MyoG_060.nd2	1152.95		40.313	40.313
316	GFP lo_mouse3_MyoG_060.nd2	1175.96		63.323	63.323
317	GFP lo_mouse3_MyoG_060.nd2	1276.8		164.163	164.163
318	GFP lo_mouse3_MyoG_060.nd2	1188.6		75.963	75.963
319	GFP lo_mouse3_MyoG_060.nd2	1086.33		-26.307	0
320	GFP lo_mouse3_MyoG_060.nd2	1496.07		383.433	383.433
321	GFP lo_mouse3_MyoG_060.nd2	1288.07		175.433	175.433
322	GFP lo_mouse3_MyoG_060.nd2	1244		131.363	131.363
323	GFP lo_mouse3_MyoG_060.nd2	1496.68		384.043	384.043
324	GFP lo_mouse3_MyoG_060.nd2	1609.2		496.563	496.563
325	GFP lo_mouse3_MyoG_060.nd2	974.3		-138.337	0
326	GFP lo_mouse3_MyoG_060.nd2	1210.15		97.513	97.513
327	GFP lo_mouse3_MyoG_060.nd2	1177.61		64.973	64.973
328	GFP lo_mouse3_MyoG_060.nd2	1070.52		-42.117	0
329	GFP lo_mouse3_MyoG_060.nd2	1274.86		162.223	162.223
330	GFP lo_mouse3_MyoG_060.nd2	1227.32		114.683	114.683
331	GFP lo_mouse3_MyoG_060.nd2	1243.64		131.003	131.003
332	GFP lo_mouse3_MyoG_060.nd2	1390.51		277.873	277.873
333	GFP lo_mouse3_MyoG_060.nd2	1077.38		-35.257	0
334	GFP lo_mouse3_MyoG_060.nd2	1102.27		-10.367	0
335	GFP lo_mouse3_MyoG_060.nd2	1634.02		521.383	521.383
336	GFP lo_mouse3_MyoG_061.nd2	1305.87	1099.11	206.763	206.763
337	GFP lo_mouse3_MyoG_061.nd2	1241.46		142.353	142.353
338	GFP lo_mouse3_MyoG_061.nd2	1288.22		189.113	189.113
339	GFP lo_mouse3_MyoG_061.nd2	1131.56		32.453	32.453
340	GFP lo_mouse3_MyoG_061.nd2	1113.62		14.513	14.513
341	GFP lo_mouse3_MyoG_061.nd2	1045.02		-54.087	0
342	GFP lo_mouse3_MyoG_061.nd2	1259.84		160.733	160.733
343	GFP lo_mouse3_MyoG_061.nd2	1249.39		150.283	150.283
344	GFP lo_mouse3_MyoG_061.nd2	1341.52		242.413	242.413
345	GFP lo_mouse3_MyoG_061.nd2	1289.45		190.343	190.343
346	GFP lo_mouse3_MyoG_061.nd2	1309.51		210.403	210.403
347	GFP lo_mouse3_MyoG_061.nd2	1474.35		375.243	375.243
348	GFP lo_mouse3_MyoG_061.nd2	1389.68		290.573	290.573
349	GFP lo_mouse3_MyoG_061.nd2	1536.56		437.453	437.453
350	GFP lo_mouse3_MyoG_061.nd2	1293.94		194.833	194.833
351	GFP lo_mouse3_MyoG_061.nd2	1340.66		241.553	241.553
352	GFP lo_mouse3_MyoG_061.nd2	1477.2		378.093	378.093
353	GFP lo_mouse3_MyoG_061.nd2	1484.15		385.043	385.043
354	GFP lo_mouse3_MyoG_061.nd2	1190.9		91.793	91.793
355	GFP lo_mouse3_MyoG_061.nd2	1173.53		74.423	74.423
356	GFP lo_mouse3_MyoG_061.nd2	1151.99		52.883	52.883
357	GFP lo_mouse3_MyoG_061.nd2	1099.63		0.523	0.523
358	GFP lo_mouse3_MyoG_061.nd2	1065.26		-33.847	0
359	GFP lo_mouse3_MyoG_061.nd2	1278.63		179.523	179.523
360	GFP lo_mouse3_MyoG_061.nd2	1249.3		150.193	150.193
361	GFP lo_mouse3_MyoG_061.nd2	1148.34		49.233	49.233
362	GFP lo_mouse3_MyoG_061.nd2	1240.32		141.213	141.213
363	GFP lo_mouse3_MyoG_061.nd2	1149.17		50.063	50.063
364	GFP lo_mouse3_MyoG_061.nd2	1145.24		46.133	46.133
365	GFP lo_mouse3_MyoG_061.nd2	1119.13		20.023	20.023
366	GFP lo_mouse3_MyoG_062.nd2	1290.41	1103.6	186.807	186.807
367	GFP lo_mouse3_MyoG_062.nd2	1373.59		269.987	269.987
368	GFP lo_mouse3_MyoG_062.nd2	1321.11		217.507	217.507
369	GFP lo_mouse3_MyoG_062.nd2	1172.22		68.617	68.617
370	GFP lo_mouse3_MyoG_062.nd2	1414.59		310.987	310.987
371	GFP lo_mouse3_MyoG_062.nd2	1293.67		190.067	190.067
372	GFP lo_mouse3_MyoG_062.nd2	1209.96		106.357	106.357
373	GFP lo_mouse3_MyoG_062.nd2	1363.1		259.497	259.497
374	GFP lo_mouse3_MyoG_062.nd2	1384.03		280.427	280.427
375	GFP lo_mouse3_MyoG_062.nd2	1320.76		217.157	217.157
376	GFP lo_mouse3_MyoG_062.nd2	1098.98		-4.623	0
377	GFP lo_mouse3_MyoG_062.nd2	1054.99		-48.613	0
378	GFP lo_mouse3_MyoG_062.nd2	1038.96		-64.643	0
379	GFP lo_mouse3_MyoG_062.nd2	1098.19		-5.413	0
380	GFP lo_mouse3_MyoG_062.nd2	1401.29		297.687	297.687
381	GFP lo_mouse3_MyoG_062.nd2	1142.13		38.527	38.527
382	GFP lo_mouse3_MyoG_062.nd2	1154.08		50.477	50.477
383	GFP lo_mouse3_MyoG_062.nd2	1168.52		64.917	64.917
384	GFP lo_mouse3_MyoG_062.nd2	1178.62		75.017	75.017
385	GFP lo_mouse3_MyoG_062.nd2	1185.41		81.807	81.807
386	GFP lo_mouse3_MyoG_062.nd2	1302.73		199.127	199.127
387	GFP lo_mouse3_MyoG_062.nd2	1307.62		204.017	204.017
388	GFP lo_mouse3_MyoG_063.nd2	1210.07	1115.65	94.423	94.423
389	GFP lo_mouse3_MyoG_063.nd2	1148.08		32.433	32.433
390	GFP lo_mouse3_MyoG_063.nd2	1489.11		373.463	373.463
391	GFP lo_mouse3_MyoG_063.nd2	1321.17		205.523	205.523
392	GFP lo_mouse3_MyoG_063.nd2	1111.04		-4.607	0
393	GFP lo_mouse3_MyoG_063.nd2	1205.55		89.903	89.903
394	GFP lo_mouse3_MyoG_063.nd2	1130.43		14.783	14.783
395	GFP lo_mouse3_MyoG_063.nd2	1146.03		30.383	30.383
396	GFP lo_mouse3_MyoG_063.nd2	1043.5		-72.147	0
397	GFP lo_mouse3_MyoG_063.nd2	1047.89		-67.757	0
398	GFP lo_mouse3_MyoG_063.nd2	1015.57		-100.077	0
399	GFP lo_mouse3_MyoG_063.nd2	1040.79		-74.857	0
400	GFP lo_mouse3_MyoG_063.nd2	1060.93		-54.717	0
401	GFP lo_mouse3_MyoG_063.nd2	1209.75		94.103	94.103
402	GFP lo_mouse3_MyoG_064.nd2	1245.34	1091.89	153.453	153.453
403	GFP lo_mouse3_MyoG_064.nd2	1249.34		157.453	157.453
404	GFP lo_mouse3_MyoG_064.nd2	980.97		-110.917	0
405	GFP lo_mouse3_MyoG_064.nd2	1198.37		106.483	106.483
406	GFP lo_mouse3_MyoG_064.nd2	1328.44		236.553	236.553
407	GFP lo_mouse3_MyoG_064.nd2	1203.97		112.083	112.083
