# Supplementary material for: Heterogeneous levels of delta-like 4 within a multinucleated niche cell maintains muscle stem cell diversity
Source: eLife. 2022 Dec 30;11:e68180. doi: 10.7554/eLife.68180 (PMC9803355; doi:10.7554/eLife.68180)
Supplement: Figure 2—source data 1. [file elife-68180-fig2-data1.xlsx]

## Sheet: WT012420
Mean Dll4 intensity in SCs vs Dll4 foci on fibers
Item	Source	Mean Dll4 (green) intensity in SCs	No of DLL4 foci on fiber, one cell diameter around the SC
1	WT fibers_012420_Fi1SC1_red channel.tif	320.25	346
2	WT fibers_012420_Fi2SC1_red channel.tif	261.78	168
3	WT fibers_012420_Fi2SC2_red channel.tif	248.69	145
4	WT fibers_012420_Fi2SC3_red channel.tif	244.05	167
5	WT fibers_012420_Fi3SC1_red channel.tif	204.36	148
6	WT fibers_012420_Fi3SC1_red channel.tif	231.95	248
7	WT fibers_012420_Fi3SC2_red channel.tif	209.86	201
8	WT fibers_012420_Fi4SC1_red channel.tif	169.43	95
9	WT fibers_012420_Fi4SC2_red channel.tif	199.22	152
10	WT fibers_012420_Fi5SC1_red channel.tif	175.32	106
11	WT fibers_012420_Fi5SC2_red channel.tif	73.36	82
12	WT fibers_012420_Fi5SC2_red channel.tif	173.77	135
13	WT fibers_012420_Fi5SC3_red channel.tif	104.45	96

## Sheet: WT_020320
Mean Dll4 intensity in SCs vs Dll4 foci on fibers
Item	Source	Mean Dll4 (green) intensity in SCs	No of DLL4 foci on fiber, one cell diameter around the SC
1	WT fibers_020320_Series011_green channel.tif	57.73	76
2	WT fibers_020320_Series015_green channel.tif	88.36	67
3	WT fibers_020320_Series020_green channel.tif	73.71	126
4	WT fibers_020320_Series025_green channel.tif	59.85	40
5	WT fibers_020320_Series029_green channel.tif	96.8	96
6	WT fibers_020320_Series033_green channel.tif	101.44	100
7	WT fibers_020320_Series037_green channel.tif	67.94	91
8	WT fibers_020320_Series041_green channel.tif	78.4	171
9	WT fibers_020320_Series045_green channel.tif	31.03	113
10	WT fibers_020320_Series050_green channel.tif	54.62	104

## Sheet: WT_030220
Mean Dll4 intensity in SCs vs Dll4 foci on fibers
Item	Source	Mean Dll4 (green) intensity in SCs	No of DLL4 foci on fiber, one cell diameter around the SC
1	WT fibers_030220_Series029_green channel.tif	181.755	89
2	WT fibers_030220_Series024_green channel.tif	165.045	128
3	WT fibers_030220_Series020_green channel.tif	139.01	72
4	WT fibers_030220_Series015_green channel.tif	157.661	102
5	WT fibers_030220_Series011_green channel.tif	197.027	112
6	WT fibers_030220_Series007_green channel.tif	255.423	150
7	WT fibers_030220_Series003_green channel.tif	208.364	136
8	WT fibers_030220_No dll4 image_green channel.tif	105.952	69

## Sheet: Ctrl4_041920
Mean Dll4 intensity in SCs vs Dll4 foci on fibers
Item	Source	Mean Dll4 (green) intensity in SCs	No of DLL4 foci on fiber, one cell diameter around the SC
1	C4_Series008_green channel.tif	170.9	174
2	C4_Series015_green channel.tif	82.72	65
3	C4_Series019_green channel.tif	91.68	149
4	C4_Series023_green channel.tif	39.07	103
5	C4_Series027_green channel.tif	97.36	103
6	C4_Series032_green channel.tif	92.25	67
7	C4_Series037_green channel.tif	34.35	67
8	C4_Series041_green channel.tif	24.65	64

## Sheet: Ctrl5_031020
Mean Dll4 intensity in SCs vs Dll4 foci on fibers
Item	Source	Mean Dll4 (green) intensity in SCs	No of DLL4 foci on fiber, one cell diameter around the SC
1	C5_Series005_green channel.tif	28.7	41
2	C5_Series008_green channel.tif	41.66	54
3	C5_Series011_green channel.tif	189.46	135
4	C5_Series014_green channel.tif	132.61	121
5	C5_Series017_green channel.tif	78.91	91
6	C5_Series020_green channel.tif	146.68	147
7	C5_Series024_green channel.tif	149.8	136
8	C5_Series027_green channel.tif	239.64	164
9	C5_Series034_green channel.tif	81.6	147
10	C5_Series037_green channel.tif	169.55	200
11	C5_Series041_green channel.tif	245.68	176
12	C5_Series045_green channel.tif	41.89	50
13	C5_Series048_green channel.tif	64.5	94
14	C5_Series051_green channel.tif	40.74	70
15	C5_Series054_green channel.tif	55.41	43
16	C5_Series057_green channel.tif	74.92	67
17	C5_Series060_green channel.tif	68.13	40
18	C5_Series063_green channel.tif	110.88	89
19	C5_Series066_green channel.tif	178.88	89
20	C5_Series070_green channel.tif	81.53	80
