# Supplementary material for: Heterogeneous levels of delta-like 4 within a multinucleated niche cell maintains muscle stem cell diversity
Source: eLife. 2022 Dec 30;11:e68180. doi: 10.7554/eLife.68180 (PMC9803355; doi:10.7554/eLife.68180)
Supplement: Figure 2—source data 2. [file elife-68180-fig2-data2.xlsx]

## Sheet: mouse1
Item	Source	Area [µm²]	Mean TxRed (Pax7)	TxRed background intensity	Mean Pax7 intensity	Sum Pax7 intensity		Mean GFP (Dll4)	GFP background intensity	Mean Dll4 intensity	Sum Dll4 intensity
1	Dll4_SC_001.nd2	35.97	1692.52	1084.84	607.68	21858.2		1052.42	524.177	528.243	19000.9
2	Dll4_SC_004.nd2	35.61	1203.44	874.66	328.78	11707.9		941.25	422.73	518.52	18464.5
3	Dll4_SC_004.nd2	41.68	1313.49		438.83	18290.4		810.37		387.64	16156.8
4	Dll4_SC_004.nd2	39.4	1231.29		356.63	14051.2		842.98		420.25	16557.8
5	Dll4_SC_004.nd2	27.07	1298.79		424.13	11481.2		824.19		401.46	10867.5
6	Dll4_SC_004.nd2	26.03	1102.43		227.77	5928.85		621.88		199.15	5183.87
7	Dll4_SC_005.nd2	25.06	1236.5	948.84	287.66	7208.76		740.53	416.89	323.64	8110.42
8	Dll4_SC_005.nd2	39.02	1388.72		439.88	17164.1		719.12		302.23	11793
9	Dll4_SC_005.nd2	26.89	1162.21		213.37	5737.52		558.86		141.97	3817.57
10	Dll4_SC_005.nd2	32.41	1369.88		421.04	13645.9		786.43		369.54	11976.8
11	Dll4_SC_005.nd2	27.28	1337.68		388.84	10607.6		704.32		287.43	7841.09
12	Dll4_SC_005.nd2	28.36	1233.72		284.88	8079.2		843.88		426.99	12109.4
13	Dll4_SC_005.nd2	32.15	1244.5		295.66	9505.47		718.88		301.99	9708.98
14	Dll4_SC_005.nd2	26.16	1078.99		130.15	3404.72		582.69		165.8	4337.33
15	Dll4_SC_005.nd2	25.56	1243.84		295	7540.2		830.42		413.53	10569.8
16	Dll4_SC_005.nd2	31.99	1157.08		208.24	6661.6		804.24		387.35	12391.3
17	Dll4_SC_005.nd2	30.69	1085.99		137.15	4209.13		718.63		301.74	9260.4
18	Dll4_SC_006.nd2	36.7	2097.82	1026.22	1071.6	39327.6		1353.56	609.57	743.99	27304.4
19	Dll4_SC_006.nd2	29.74	1513.36		487.137	14487.4		1200.23		590.66	17566.2
20	Dll4_SC_006.nd2	28.64	1265.9		239.677	6864.34		790.32		180.75	5176.68
21	Dll4_SC_007.nd2	36.12	1723.08	978.793	744.287	26883.6		1053.41	535.817	517.593	18695.5
22	Dll4_SC_007.nd2	43.04	1491.56		512.767	22069.5		1102.42		566.603	24386.6
23	Dll4_SC_007.nd2	23.15	1448.12		469.327	10864.9		971.53		435.713	10086.8
24	Dll4_SC_008.nd2	29.26	1282.48	996.463	286.017	8368.85		869.76	440.207	429.553	12568.7
25	Dll4_SC_008.nd2	30.6	1097.85		101.387	3102.43		590.68		150.473	4604.48
26	Dll4_SC_008.nd2	33.13	1326.82		330.357	10944.7		769.66		329.453	10914.8
27	Dll4_SC_008.nd2	39.68	1289.39		292.927	11623.3		799.34		359.133	14250.4
28	Dll4_SC_008.nd2	32.35	1220.53		224.067	7248.56		674.28		234.073	7572.27
29	Dll4_SC_008.nd2	33.89	1381.28		384.817	13041.4		757.83		317.623	10764.3
30	Dll4_SC_009.nd2	40.38	1366.09	878.113	487.977	19704.5		742.08	358.657	383.423	15482.6
31	Dll4_SC_009.nd2	41.82	1009.37		131.257	5489.15		564.61		205.953	8612.97
32	Dll4_SC_009.nd2	34.91	1178.63		300.517	10491		730.22		371.563	12971.3
33	Dll4_SC_009.nd2	39.18	1158.46		280.347	10984		642.56		283.903	11123.3
34	Dll4_SC_009.nd2	29.26	1351.08		472.967	13839		695.11		336.453	9844.62
35	Dll4_SC_009.nd2	23.71	1077.63		199.517	4730.54		651.94		293.283	6953.75
36	Dll4_SC_009.nd2	34.24	1062.2		184.087	6303.13		619.09		260.433	8917.24
37	Dll4_SC_009.nd2	36.93	1175.5		297.387	10982.5		686.09		327.433	12092.1
38	Dll4_SC_009.nd2	39.69	1236.21		358.097	14212.9		730.27		371.613	14749.3
39	Dll4_SC_009.nd2	43.14	1195.89		317.777	13708.9		694.82		336.163	14502.1
40	Dll4_SC_009.nd2	45.52	1200.57		322.457	14678.2		701.79		343.133	15619.4
41	Dll4_SC_009.nd2	36.79	1052.08		173.967	6400.23		589.64		230.983	8497.88
42	Dll4_SC_009.nd2	34.97	1029.67		151.557	5299.94		520.31		161.653	5653.02
43	Dll4_SC_009.nd2	35.77	1130.88		252.767	9041.46		730.59		371.933	13304.1
44	Dll4_SC_009.nd2	28.7	1076.8		198.687	5702.31		654.03		295.373	8477.21
45	Dll4_SC_009.nd2	32.86	942.1		63.9867	2102.6		514.48		155.823	5120.35
46	Dll4_SC_009.nd2	32.32	1313.45		435.337	14070.1		665.77		307.113	9925.9
47	Dll4_SC_009.nd2	30.11	1316.9		438.787	13211.9		652.61		293.953	8850.93
48	Dll4_SC_009.nd2	35.03	1256.32		378.207	13248.6		686.59		327.933	11487.5
49	Dll4_SC_009.nd2	33.85	1278.49		400.377	13552.8		516.05		157.393	5327.76
50	Dll4_SC_010.nd2	31.49	1282.23	1014.85	267.383	8419.9		717.03	521.533	195.497	6156.19
51	Dll4_SC_010.nd2	31.26	1415.15		400.303	12513.5		905.44		383.907	12000.9
52	Dll4_SC_010.nd2	29.41	1177.49		162.643	4783.34		805.53		283.997	8352.34
53	Dll4_SC_011.nd2	27.01	1362.22	992.643	369.577	9982.27		849.08	576.697	272.383	7357.07
54	Dll4_SC_011.nd2	32.34	1456.13		463.487	14989.2		871.48		294.783	9533.29
55	Dll4_SC_011.nd2	35.41	1296.3		303.657	10752.5		979.76		403.063	14272.5
56	Dll4_SC_012.nd2	33.86	1590.16	956.97	633.19	21439.8		1015.77	438.19	577.58	19556.9
57	Dll4_SC_012.nd2	28.51	1587.61		630.64	17979.5		985.2		547.01	15595.3
58	Dll4_SC_012.nd2	28.23	1371.03		414.06	11688.9		974		535.81	15125.9
59	Dll4_SC_012.nd2	36.58	1367.2		410.23	15006.2		742.23		304.04	11121.8
60	Dll4_SC_012.nd2	16.48	1138.91		181.94	2998.37		690.02		251.83	4150.16
61	Dll4_SC_012.nd2	15.71	1266.44		309.47	4861.77		926.31		488.12	7668.37
62	Dll4_SC_012.nd2	17.22	1156.43		199.46	3434.7		939.84		501.65	8638.41
63	Dll4_SC_012.nd2	14.69	1125.11		168.14	2469.98		837.11		398.92	5860.13
64	Dll4_SC_012.nd2	26.31	1551.99		595.02	15655		994.27		556.08	14630.5
65	Dll4_SC_012.nd2	29.56	1378.68		421.71	12465.7		999.28		561.09	16585.8
66	Dll4_SC_012.nd2	28.7	1243.95		286.98	8236.33		842.69		404.5	11609.2
67	Dll4_SC_013.nd2	39.98	1492.88	1049.93	442.95	17709.1		841.87	468.823	373.047	14914.4
68	Dll4_SC_013.nd2	38.35	1591.24		541.31	20759.2		994.82		525.997	20172
69	Dll4_SC_013.nd2	39.48	1687.07		637.14	25154.3		1065.77		596.947	23567.5
70	Dll4_SC_013.nd2	30.83	1303.26		253.33	7810.16		794.82		325.997	10050.5
71	Dll4_SC_013.nd2	29.04	1306.44		256.51	7449.05		840.76		371.937	10801
72	Dll4_SC_013.nd2	38.62	1482.82		432.89	16718.2		1052.48		583.657	22540.8
73	Dll4_SC_013.nd2	43.78	1348.7		298.77	13080.2		881.22		412.397	18054.7
74	Dll4_SC_013.nd2	31.18	1468.88		418.95	13062.9		1073.42		604.597	18851.3
75	Dll4_SC_013.nd2	43.61	1334.05		284.12	12390.5		827.26		358.437	15631.4
76	Dll4_SC_013.nd2	38.84	1370.49		320.56	12450.6		885.07		416.247	16167
77	Dll4_SC_013.nd2	34.89	1525.75		475.82	16601.4		1141.22		672.397	23459.9
78	Dll4_SC_013.nd2	42.5	1374.81		324.88	13807.4		921.15		452.327	19223.9
79	Dll4_SC_013.nd2	42.12	1532.85		482.92	20340.6		1112.61		643.787	27116.3
80	Dll4_SC_013.nd2	28.21	1596.93		547	15430.9		945.7		476.877	13452.7
81	Dll4_SC_013.nd2	36.23	1256.82		206.89	7495.62		749.91		281.087	10183.8
82	Dll4_SC_013.nd2	40.69	1283.73		233.8	9513.32		736.16		267.337	10877.9
83	Dll4_SC_014.nd2	37.8	1523.8	973.957	549.843	20784.1		945.09	487.47	457.62	17298
84	Dll4_SC_014.nd2	35.64	1614.95		640.993	22845		1025.51		538.04	19175.7
85	Dll4_SC_014.nd2	37.24	1530.62		556.663	20730.1		931.63		444.16	16540.5
86	Dll4_SC_014.nd2	34.52	1298.3		324.343	11196.3		1031.36		543.89	18775.1
87	Dll4_SC_014.nd2	29.74	1194.35		220.393	6554.5		865.39		377.92	11239.3
88	Dll4_SC_014.nd2	27.19	1215.4		241.443	6564.84		922.68		435.21	11833.4
89	Dll4_SC_014.nd2	34.31	1273.24		299.283	10268.4		946.74		459.27	15757.6
90	Dll4_SC_015.nd2	32.24	1219.32	979.92	239.4	7718.26		817.76	557.137	260.623	8402.5
91	Dll4_SC_015.nd2	34.06	1131.65		151.73	5167.92		705.56		148.423	5055.3
92	Dll4_SC_015.nd2	38.16	1524.23		544.31	20770.9		986.98		429.843	16402.8
93	Dll4_SC_015.nd2	40.17	1612.8		632.88	25422.8		968.57		411.433	16527.3
94	Dll4_SC_015.nd2	33.05	1365.18		385.26	12732.8		953.76		396.623	13108.4
95	Dll4_SC_015.nd2	35.62	1316.45		336.53	11987.2		882.03		324.893	11572.7
96	Dll4_SC_015.nd2	43.88	1727.58		747.66	32807.3		1073.41		516.273	22654.1
97	Dll4_SC_015.nd2	41.24	1480.23		500.31	20632.8		927.58		370.443	15277.1
98	Dll4_SC_015.nd2	38.38	1341.36		361.44	13872.1		977.33		420.193	16127
99	Dll4_SC_015.nd2	36.13	1131.23		151.31	5466.83		941.91		384.773	13901.9
100	Dll4_SC_015.nd2	31.61	1120.87		140.95	4455.43		874.99		317.853	10047.3

## Sheet: mouse2
Item	Source	Area [µm²]	Mean TxRed (Pax7)	TxRed background intensity	Mean Pax7 intensity	Sum Pax7 intensity		Mean GFP (Dll4)	GFP background intensity	Mean Dll4 intensity	Sum Dll4 intensity
1	Dll4_SC_001.nd2	33.46	1612.02	1045.61	566.407	18952		1031	661.42	369.58	12366.1
2	Dll4_SC_001.nd2	26.99	1201.42		155.807	4205.22		865.4		203.98	5505.42
3	Dll4_SC_002.nd2	37.13	1469.16	1110.8	358.357	13305.8		1034.76	713.707	321.053	11920.7
4	Dll4_SC_003.nd2	28.1	1542.89	1078.23	464.66	13056.9		1074.58	714.4	360.18	10121.1
5	Dll4_SC_003.nd2	32.07	1372.7		294.47	9443.65		860.1		145.7	4672.6
6	Dll4_SC_004.nd2	38.79	1496.38	914.237	582.143	22581.3		947.04	563.65	383.39	14871.7
7	Dll4_SC_004.nd2	34.38	1313.54		399.303	13728		951.52		387.87	13335
8	Dll4_SC_004.nd2	37.73	1541.49		627.253	23666.3		916.02		352.37	13294.9
9	Dll4_SC_004.nd2	34.9	1575.97		661.733	23094.5		1126.83		563.18	19655
10	Dll4_SC_004.nd2	35.7	1265.66		351.423	12545.8		965.97		402.32	14362.8
11	Dll4_SC_004.nd2	28.09	1123.05		208.813	5865.57		867.48		303.83	8534.58
12	Dll4_SC_004.nd2	36.82	1040.42		126.183	4646.07		808.44		244.79	9013.17
13	Dll4_SC_004.nd2	31.66	996.33		82.0933	2599.07		684.45		120.8	3824.53
14	Dll4_SC_004.nd2	34.02	1028.17		113.933	3876.01		793.58		229.93	7822.22
15	Dll4_SC_005.nd2	30.63	1182.12	875.803	306.317	9382.48		624.65	484.147	140.503	4303.62
16	Dll4_SC_005.nd2	36.37	1110.57		234.767	8538.46		760.26		276.113	10042.2
17	Dll4_SC_005.nd2	40.36	1202.59		326.787	13189.1		793.42		309.273	12482.3
18	Dll4_SC_005.nd2	32.11	1111.68		235.877	7574		707.81		223.663	7181.83
19	Dll4_SC_005.nd2	38.14	1000.97		125.167	4773.86		642.19		158.043	6027.77
20	Dll4_SC_007.nd2	44.43	1261.01	947.513	313.497	13928.7		1029.81	650.207	379.603	16865.8
21	Dll4_SC_007.nd2	37	1183.61		236.097	8735.58		818.69		168.483	6233.87
22	Dll4_SC_007.nd2	35.44	1201.37		253.857	8996.68		911.76		261.553	9269.44
23	Dll4_SC_008.nd2	28.74	1291.79	931.973	359.817	10341.1		1054.36	569.97	484.39	13921.4
24	Dll4_SC_008.nd2	26.9	1090.04		158.067	4251.99		846.96		276.99	7451.03
25	Dll4_SC_008.nd2	37.16	1456.57		524.597	19494		964.91		394.94	14676
26	Dll4_SC_008.nd2	33.66	1275.36		343.387	11558.4		965.31		395.34	13307.1
27	Dll4_SC_008.nd2	24.24	1048.27		116.297	2819.03		812.83		242.86	5886.93
28	Dll4_SC_009.nd2	32.19	1423.84	968.567	455.273	14655.2		966.01	597.903	368.107	11849.4
29	Dll4_SC_009.nd2	43.59	1270.36		301.793	13155.2		886.76		288.857	12591.3
30	Dll4_SC_009.nd2	43.27	1219.36		250.793	10851.8		942.8		344.897	14923.7
31	Dll4_SC_009.nd2	36.4	1063.23		94.6633	3445.75		756.1		158.197	5758.36
32	Dll4_SC_009.nd2	30.99	1252.65		284.083	8803.74		989.6		391.697	12138.7
33	Dll4_SC_010.nd2	31.75	981.34	925.533	55.8067	1771.86		783.99	573.727	210.263	6675.86
34	Dll4_SC_010.nd2	47.63	1423.64		498.107	23724.8		925.75		352.023	16766.9
35	Dll4_SC_010.nd2	37.29	1125.26		199.727	7447.81		928.04		354.313	13212.3
36	Dll4_SC_010.nd2	42.63	1127.42		201.887	8606.43		826.56		252.833	10778.3
37	Dll4_SC_010.nd2	43.21	1008.03		82.4967	3564.68		741.98		168.253	7270.23
38	Dll4_SC_010.nd2	29.07	1120.46		194.927	5666.52		950.35		376.623	10948.4
39	Dll4_SC_010.nd2	33.54	1465.53		539.997	18111.5		1040.67		466.943	15661.3
40	Dll4_SC_010.nd2	32.97	1210.93		285.397	9409.53		759.46		185.733	6123.63
41	Dll4_SC_010.nd2	31.32	1314.33		388.797	12177.1		817.66		243.933	7639.99
42	Dll4_SC_011.nd2	38.5	1160.58	875.537	285.043	10974.2		894.74	519.913	374.827	14430.8
43	Dll4_SC_011.nd2	33.97	1082.55		207.013	7032.24		765.61		245.697	8346.32
44	Dll4_SC_011.nd2	40.23	1284.81		409.273	16465.1		850.46		330.547	13297.9
45	Dll4_SC_011.nd2	41.05	1389.12		513.583	21082.6		887.91		367.997	15106.3
46	Dll4_SC_011.nd2	35.38	1123.08		247.543	8758.08		862.85		342.937	12133.1
47	Dll4_SC_011.nd2	38.22	1072.88		197.343	7542.46		785.83		265.917	10163.3
48	Dll4_SC_011.nd2	34.36	1044.32		168.783	5799.4		840.75		320.837	11023.9
49	Dll4_SC_011.nd2	28.5	1027.95		152.413	4343.78		885.81		365.897	10428.1
50	Dll4_SC_011.nd2	31.8	952.8		77.2633	2456.97		690.31		170.397	5418.61
51	Dll4_SC_011.nd2	38.9	1155.73		280.193	10899.5		776.84		256.927	9994.45
52	Dll4_SC_011.nd2	30.53	1100.61		225.073	6871.49		703.44		183.527	5603.07
53	Dll4_SC_011.nd2	28.33	1407.98		532.443	15084.1		886.7		366.787	10391.1
54	Dll4_SC_011.nd2	32.41	1045.28		169.743	5501.38		798.28		278.367	9021.86
55	Dll4_SC_011.nd2	30.45	1172.76		297.223	9050.45		881.93		362.017	11023.4
56	Dll4_SC_011.nd2	37.81	1174.71		299.173	11311.7		819.21		299.297	11316.4
57	Dll4_SC_011.nd2	37.44	1087.76		212.223	7945.64		847.62		327.707	12269.3
58	Dll4_SC_012.nd2	40.15	1115.4	852.633	262.767	10550.1		818.61	528.787	289.823	11636.4
59	Dll4_SC_012.nd2	44.77	1146.17		293.537	13141.6		892.92		364.133	16302.2
60	Dll4_SC_012.nd2	40.46	1309.87		457.237	18499.8		858.41		329.623	13336.6
61	Dll4_SC_012.nd2	37.75	1048		195.367	7375.09		674.13		145.343	5486.71
62	Dll4_SC_012.nd2	41.41	981.57		128.937	5339.27		695.43		166.643	6900.7
63	Dll4_SC_012.nd2	33.85	1269.88		417.247	14123.8		992.59		463.803	15699.7
64	Dll4_SC_012.nd2	37.34	1200.95		348.317	13006.1		862.11		333.323	12446.3
65	Dll4_SC_012.nd2	27.99	1030.71		178.077	4984.37		769.66		240.873	6742.04
66	Dll4_SC_012.nd2	41.56	1068.98		216.347	8991.37		728.23		199.443	8288.86
67	Dll4_SC_012.nd2	34.59	968.89		116.257	4021.32		723.9		195.113	6748.97
68	Dll4_SC_012.nd2	34.39	978.38		125.747	4324.43		723.88		195.093	6709.26
69	Dll4_SC_012.nd2	37.25	1000.69		148.057	5515.11		670.95		142.163	5295.58
70	Dll4_SC_012.nd2	37.27	1020.64		168.007	6261.61		805.71		276.923	10320.9
71	Dll4_SC_013.nd2	30.12	898.32	867.52	30.8	927.696		725.95	557.76	168.19	5065.88
72	Dll4_SC_013.nd2	39.66	1130.16		262.64	10416.3		961.05		403.29	15994.5
73	Dll4_SC_013.nd2	31.71	1176.21		308.69	9788.56		782.73		224.97	7133.8
74	Dll4_SC_013.nd2	37.75	964.93		97.41	3677.23		790.53		232.77	8787.07
75	Dll4_SC_013.nd2	29.49	993.02		125.5	3700.99		663.54		105.78	3119.45
76	Dll4_SC_014.nd2	37.37	1352.74	909.633	443.107	16558.9		855.19	511.903	343.287	12828.6
77	Dll4_SC_014.nd2	41.51	1356.72		447.087	18558.6		956.37		444.467	18449.8
78	Dll4_SC_014.nd2	35.01	1357.26		447.627	15671.4		837.75		325.847	11407.9
79	Dll4_SC_014.nd2	38.17	1057.93		148.297	5660.48		777.36		265.457	10132.5
80	Dll4_SC_014.nd2	36.85	1028.98		119.347	4397.92		789.38		277.477	10225
81	Dll4_SC_015.nd2	37.67	1203.71	947.127	256.583	9665.49		794.52	579.343	215.177	8105.71
82	Dll4_SC_015.nd2	41.37	1459.36		512.233	21191.1		912.75		333.407	13793
83	Dll4_SC_015.nd2	42.99	1097.14		150.013	6449.07		810.07		230.727	9918.94
84	Dll4_SC_015.nd2	26.35	1150.36		203.233	5355.2		975.63		396.287	10442.2
85	Dll4_SC_015.nd2	31.48	1076.36		129.233	4068.27		940.32		360.977	11363.5
86	Dll4_SC_015.nd2	38.34	1266.89		319.763	12259.7		831.85		252.507	9681.11
87	Dll4_SC_016.nd2	36.82	1220.4	892.42	327.98	12076.2		877.73	603.957	273.773	10080.3
88	Dll4_SC_016.nd2	33.67	1264.9		372.48	12541.4		923.41		319.453	10756
89	Dll4_SC_016.nd2	32.69	1255.03		362.61	11853.7		1095.79		491.833	16078
90	Dll4_SC_016.nd2	34.38	1150.95		258.53	8888.26		853.52		249.563	8579.99
91	Dll4_SC_017.nd2	42.53	1070.23	866.45	203.78	8666.76		741.87	521.73	220.14	9362.55
92	Dll4_SC_017.nd2	48.44	1301.63		435.18	21080.1		868.57		346.84	16800.9
93	Dll4_SC_017.nd2	34.17	1077.96		211.51	7227.3		834.19		312.46	10676.8
94	Dll4_SC_017.nd2	32.17	1072.09		205.64	6615.44		902.65		380.92	12254.2
95	Dll4_SC_017.nd2	44.33	916.94		50.49	2238.22		635.66		113.93	5050.52
96	Dll4_SC_017.nd2	34.21	1208.4		341.95	11698.1		944.04		422.31	14447.2
97	Dll4_SC_017.nd2	41.58	991.71		125.26	5208.31		688.06		166.33	6916
98	Dll4_SC_017.nd2	33.64	938.93		72.48	2438.23		662.67		140.94	4741.22
99	Dll4_SC_018.nd2	29.64	1167.16	908.343	258.817	7671.33		738.93	548.983	189.947	5630.02
100	Dll4_SC_018.nd2	30.63	1494.77		586.427	17962.2		1088.57		539.587	16527.5
101	Dll4_SC_018.nd2	30.73	1195.81		287.467	8833.85		940.92		391.937	12044.2
102	Dll4_SC_018.nd2	30.94	1310.03		401.687	12428.2		1152.69		603.707	18678.7
103	Dll4_SC_018.nd2	31.48	1553.28		644.937	20302.6		925.59		376.607	11855.6
104	Dll4_SC_018.nd2	30.63	1333.45		425.107	13021		884.55		335.567	10278.4
105	Dll4_SC_018.nd2	22.66	958.52		50.1767	1137		780.94		231.957	5256.14
106	Dll4_SC_018.nd2	25.74	1066.69		158.347	4075.84		770.45		221.467	5700.55
107	Dll4_SC_018.nd2	29.09	1131.28		222.937	6485.23		915.68		366.697	10667.2
108	Dll4_SC_018.nd2	34.17	1318.72		410.377	14022.6		879.96		330.977	11309.5
109	Dll4_SC_018.nd2	32.39	1169.22		260.877	8449.8		802.4		253.417	8208.17
110	Dll4_SC_018.nd2	34.74	985.73		77.3867	2688.41		768.81		219.827	7636.78
111	Dll4_SC_018.nd2	43.32	1032.18		123.837	5364.6		656.6		107.617	4661.95
112	Dll4_SC_018.nd2	37.42	1050.52		142.177	5320.25		838.75		289.767	10843.1
113	Dll4_SC_018.nd2	31.76	1543.4		635.057	20169.4		923.15		374.167	11883.5
114	Dll4_SC_018.nd2	43.92	1127.53		219.187	9626.68		818.89		269.907	11854.3
115	Dll4_SC_018.nd2	38.45	1288.08		379.737	14600.9		1009.96		460.977	17724.6

## Sheet: mouse3
Item	Source	Area [µm²]	Mean TxRed (Pax7)	TxRed background intensity	Mean Pax7 intensity	Sum Pax7 intensity		Mean GFP (Dll4)	GFP background intensity	Mean Dll4 intensity	Sum Dll4 intensity
1	Dll4_SC_001.nd2	37.41	1418.71	1036.17	382.537	14310.7		884.67	414.68	469.99	17582.3
2	Dll4_SC_001.nd2	36.54	1617.35		581.177	21236.2		948.05		533.37	19489.3
3	Dll4_SC_001.nd2	35.84	1552.47		516.297	18504.1		862.75		448.07	16058.8
4	Dll4_SC_001.nd2	42.7	1370.97		334.797	14295.8		897.68		483	20624.1
5	Dll4_SC_001.nd2	42.2	1170.61		134.437	5673.23		683.43		268.75	11341.2
6	Dll4_SC_001.nd2	46.52	1281.54		245.367	11414.5		697.63		282.95	13162.8
7	Dll4_SC_001.nd2	28.28	1461		424.827	12014.1		700.37		285.69	8079.31
8	Dll4_SC_001.nd2	30.58	1175.81		139.637	4270.09		630.49		215.81	6599.47
9	Dll4_SC_001.nd2	33.97	1307.27		271.097	9209.15		701.31		286.63	9736.82
10	Dll4_SC_001.nd2	57	1142.38		106.207	6053.78		554.51		139.83	7970.31
11	Dll4_SC_002.nd2	38.02	1686.09	1003.71	682.377	25944		969.42	525.03	444.39	16895.7
12	Dll4_SC_002.nd2	32.84	1436.49		432.777	14212.4		1009.19		484.16	15899.8
13	Dll4_SC_002.nd2	45.78	1192.1		188.387	8624.34		884.92		359.89	16475.8
14	Dll4_SC_003.nd2	31.26	1593	1029.87	563.13	17603.4		981.73	572.267	409.463	12799.8
15	Dll4_SC_003.nd2	32.58	1757.83		727.96	23716.9		1031.44		459.173	14959.9
16	Dll4_SC_003.nd2	31.33	1199		169.13	5298.84		1029.43		457.163	14322.9
17	Dll4_SC_003.nd2	33.59	1242.74		212.87	7150.3		938.92		366.653	12315.9
18	Dll4_SC_004.nd2	38.72	1227.72	940.247	287.473	11131		822.14	552.273	269.867	10449.2
19	Dll4_SC_004.nd2	31.66	1216.5		276.253	8746.18		840.14		287.867	9113.86
20	Dll4_SC_004.nd2	29.48	1226.49		286.243	8438.45		772.77		220.497	6500.24
21	Dll4_SC_004.nd2	28.84	1047.64		107.393	3097.22		802.37		250.097	7212.79
22	Dll4_SC_005.nd2	34.38	1270.13	916.853	353.277	12145.7		734.11	539.443	194.667	6692.64
23	Dll4_SC_005.nd2	39.12	1209.11		292.257	11433.1		822.56		283.117	11075.5
24	Dll4_SC_005.nd2	39.37	1184.86		268.007	10551.4		885.74		346.297	13633.7
25	Dll4_SC_006.nd2	31.06	1253.53	890.743	362.787	11268.2		964.91	590.957	373.953	11615
26	Dll4_SC_006.nd2	32.68	1352.43		461.687	15087.9		933.57		342.613	11196.6
27	Dll4_SC_006.nd2	35.24	1397.52		506.777	17858.8		962.89		371.933	13106.9
28	Dll4_SC_006.nd2	27.84	1333.97		443.227	12339.4		903.83		312.873	8710.39
29	Dll4_SC_006.nd2	32.85	1313.41		422.667	13884.6		944.22		353.263	11604.7
30	Dll4_SC_006.nd2	29.16	1296.44		405.697	11830.1		846.21		255.253	7443.19
31	Dll4_SC_006.nd2	30.76	1335.38		444.637	13677		1092.21		501.253	15418.6
32	Dll4_SC_006.nd2	30.29	1202.72		311.977	9449.77		924.96		334.003	10117
33	Dll4_SC_006.nd2	28.56	1145.14		254.397	7265.57		811.38		220.423	6295.29
34	Dll4_SC_006.nd2	32.74	1169.26		278.517	9118.64		812.52		221.563	7253.98
35	Dll4_SC_006.nd2	25.78	1274.12		383.377	9883.45		909.93		318.973	8223.13
36	Dll4_SC_006.nd2	34.42	1280.95		390.207	13430.9		770.46		179.503	6178.5
37	Dll4_SC_006.nd2	25.63	1052.66		161.917	4149.92		770.57		179.613	4603.49
38	Dll4_SC_006.nd2	27.59	1114.66		223.917	6177.86		899.4		308.443	8509.95
39	Dll4_SC_006.nd2	35.8	1207.64		316.897	11344.9		949.48		358.523	12835.1
40	Dll4_SC_006.nd2	37.85	1235.86		345.117	13062.7		916.32		325.363	12315
41	Dll4_SC_006.nd2	33.81	1208.82		318.077	10754.2		1008.93		417.973	14131.7
42	Dll4_SC_006.nd2	33.54	1222.73		331.987	11134.8		893.07		302.113	10132.9
43	Dll4_SC_006.nd2	33.34	1151.09		260.347	8679.96		869.22		278.263	9277.3
44	Dll4_SC_006.nd2	32.68	1162.12		271.377	8868.59		944.27		353.313	11546.3
45	Dll4_SC_006.nd2	42.5	1188.18		297.437	12641.1		982.32		391.363	16632.9
46	Dll4_SC_006.nd2	29.23	1534.6		643.857	18819.9		1123.82		532.863	15575.6
47	Dll4_SC_006.nd2	31.06	1204.19		313.447	9735.65		1029.27		438.313	13614
48	Dll4_SC_006.nd2	30.52	1098.8		208.057	6349.89		949.43		358.473	10940.6
49	Dll4_SC_006.nd2	29.54	1105.97		215.227	6357.8		943.41		352.453	10411.5
50	Dll4_SC_006.nd2	32.09	1023.14		132.397	4248.61		708.65		117.693	3776.78
51	Dll4_SC_006.nd2	25.87	1112.81		222.067	5744.86		872.65		281.693	7287.41
52	Dll4_SC_007.nd2	52.37	1552.74	917.06	635.68	33290.6		1004.62	591.94	412.68	21612.1
53	Dll4_SC_007.nd2	36.96	1163.95		246.89	9125.05		721.33		129.39	4782.25
54	Dll4_SC_007.nd2	42.48	1225.41		308.35	13098.7		971.54		379.6	16125.4
55	Dll4_SC_007.nd2	41.24	1300.68		383.62	15820.5		916.71		324.77	13393.5
56	Dll4_SC_007.nd2	46.28	1186.47		269.41	12468.3		860.75		268.81	12440.5
57	Dll4_SC_007.nd2	36.65	1309.64		392.58	14388.1		1049.51		457.57	16769.9
58	Dll4_SC_007.nd2	39.99	1687.22		770.16	30798.7		1211.71		619.77	24784.6
59	Dll4_SC_007.nd2	42.17	1046.6		129.54	5462.7		789.67		197.73	8338.27
60	Dll4_SC_008.nd2	46.28	1070.6	771.4	299.2	13847		567.73	359.023	208.707	9658.94
61	Dll4_SC_008.nd2	46.87	931.15		159.75	7487.48		495.82		136.797	6411.66
62	Dll4_SC_008.nd2	47.66	989.58		218.18	10398.5		465.61		106.587	5079.92
63	Dll4_SC_008.nd2	39.23	878.58		107.18	4204.67		528.37		169.347	6643.47
64	Dll4_SC_008.nd2	34.24	964.97		193.57	6627.84		529.45		170.427	5835.41
