# Supplementary material for: Heterogeneous levels of delta-like 4 within a multinucleated niche cell maintains muscle stem cell diversity
Source: eLife. 2022 Dec 30;11:e68180. doi: 10.7554/eLife.68180 (PMC9803355; doi:10.7554/eLife.68180)
Supplement: Figure 2—source data 4. [file elife-68180-fig2-data4.xlsx]

## Sheet: Pax7nGFP vs Dll4_mouse1
Item	Source	Area [µm²]	MeanTXRed (Dll4)	TxRed background intensity	Mean Dll4 intensity	Sum Dll4 intensity		MeanGFP (Pax7-nGFP)	GFP background intensity	Mean Pax7-nGFP intensity	Sum Pax7-nGFP intensity
1	Pax7nGFP_Dll4-002.nd2	17.73	2537.04	1871.05	665.993	11808.1		1454.45	461.853	992.597	17598.7
2	Pax7nGFP_Dll4-002.nd2	23.39	2976.89		1105.84	25865.7		1647.23		1185.38	27726
3	Pax7nGFP_Dll4-002.nd2	26.04	3032.33		1161.28	30239.8		1573.22		1111.37	28940
4	Pax7nGFP_Dll4-002.nd2	22.61	2358.2		487.153	11014.5		1046.82		584.967	13226.1
5	Pax7nGFP_Dll4-002.nd2	25.1	3236.85		1365.8	34281.7		1381.47		919.617	23082.4
6	Pax7nGFP_Dll4-002.nd2	21.82	2998.91		1127.86	24610		1279.91		818.057	17850
7	Pax7nGFP_Dll4-002.nd2	21.93	3235.91		1364.86	29931.5		1417.5		955.647	20957.3
8	Pax7nGFP_Dll4-002.nd2	19.88	2534.16		663.113	13182.7		1809.03		1347.18	26781.9
9	Pax7nGFP_Dll4-003.nd2	24.26	3289.6	1941.02	1348.58	32716.5		1688.54	674.977	1013.56	24589
10	Pax7nGFP_Dll4-003.nd2	24.34	3619.6		1678.58	40856.6		1904.4		1229.42	29924.2
11	Pax7nGFP_Dll4-003.nd2	30.45	3392.23		1451.21	44189.2		1982.64		1307.66	39818.3
12	Pax7nGFP_Dll4-003.nd2	29.98	3285.13		1344.11	40296.3		1757.67		1082.69	32459.1
13	Pax7nGFP_Dll4-003.nd2	26.94	2845.66		904.637	24370.9		1496.06		821.083	22120
14	Pax7nGFP_Dll4-003.nd2	26.36	3287.93		1346.91	35504.5		1709.4		1034.42	27267.4
15	Pax7nGFP_Dll4-003.nd2	24.29	2790.16		849.137	20625.5		1697.3		1022.32	24832.2
16	Pax7nGFP_Dll4-003.nd2	27.91	2780.25		839.227	23422.8		1883.34		1208.36	33725.4
17	Pax7nGFP_Dll4-003.nd2	28.19	2538.26		597.237	16836.1		1643.66		968.683	27307.2
18	Pax7nGFP_Dll4-004.nd2	13.69	2612.19	2195.86	416.327	5699.51		1035.72	708.307	327.413	4482.29
19	Pax7nGFP_Dll4-004.nd2	20.75	2628.49		432.627	8977		1941.21		1232.9	25582.7
20	Pax7nGFP_Dll4-004.nd2	24.63	3047.34		851.477	20971.9		1431.9		723.593	17822.1
21	Pax7nGFP_Dll4-004.nd2	22.71	2843.78		647.917	14714.2		1782.55		1074.24	24396.1
22	Pax7nGFP_Dll4-004.nd2	33.68	2770.62		574.757	19357.8		1145.12		436.813	14711.9
23	Pax7nGFP_Dll4-004.nd2	25.97	2692.89		497.027	12907.8		1768.96		1060.65	27545.2
24	Pax7nGFP_Dll4-005.nd2	23.03	3146.03	2314.6	831.43	19147.8		2352.14	655.88	1696.26	39064.9
25	Pax7nGFP_Dll4-005.nd2	35.72	3296.77		982.17	35083.1		1935.05		1279.17	45692
26	Pax7nGFP_Dll4-005.nd2	40.52	3371.8		1057.2	42837.7		1587.6		931.72	37753.3
27	Pax7nGFP_Dll4-005.nd2	32	3090.39		775.79	24825.3		1459.39		803.51	25712.3
28	Pax7nGFP_Dll4-005.nd2	33.78	3385.13		1070.53	36162.5		1649.93		994.05	33579
29	Pax7nGFP_Dll4-005.nd2	39.11	3369.4		1054.8	41253.2		1560.96		905.08	35397.7
30	Pax7nGFP_Dll4-005.nd2	31.03	2801.8		487.2	15117.8		1300.17		644.29	19992.3
31	Pax7nGFP_Dll4-005.nd2	33.1	3100.66		786.06	26018.6		1613.87		957.99	31709.5
32	Pax7nGFP_Dll4-005.nd2	41.96	3612.85		1298.25	54474.6		2211.44		1555.56	65271.3
33	Pax7nGFP_Dll4-005.nd2	33.57	3051.12		736.52	24725		1657.28		1001.4	33617
34	Pax7nGFP_Dll4-005.nd2	34.86	2805.07		490.47	17097.8		1579.24		923.36	32188.3
35	Pax7nGFP_Dll4-006.nd2	22.77	3440.41	1820.12	1620.29	36894.1		2031.44	686.803	1344.64	30617.4
36	Pax7nGFP_Dll4-006.nd2	23.34	2682.16		862.043	20120.1		1663.47		976.667	22795.4
37	Pax7nGFP_Dll4-006.nd2	24.76	2944.03		1123.91	27828.1		2231.11		1544.31	38237
38	Pax7nGFP_Dll4-006.nd2	24.26	2830.52		1010.4	24512.4		2035.36		1348.56	32716
39	Pax7nGFP_Dll4-006.nd2	25.55	2574.33		754.213	19270.2		1945.99		1259.19	32172.2
40	Pax7nGFP_Dll4-006.nd2	21.95	2482.35		662.233	14536		1438.1		751.297	16491
41	Pax7nGFP_Dll4-006.nd2	23.74	2326.35		506.233	12018		1579.65		892.847	21196.2
42	Pax7nGFP_Dll4-007.nd2	23.63	2570.63	1980.74	589.893	13939.2		2033.95	858.537	1175.41	27775
43	Pax7nGFP_Dll4-007.nd2	29.32	3078.22		1097.48	32178.2		1941.44		1082.9	31750.7
44	Pax7nGFP_Dll4-007.nd2	32.05	3143.99		1163.25	37282.3		1902.03		1043.49	33444
45	Pax7nGFP_Dll4-007.nd2	30.11	3172.46		1191.72	35882.8		2053.44		1194.9	35978.5
46	Pax7nGFP_Dll4-007.nd2	29.95	2929.23		948.493	28407.4		1820.67		962.133	28815.9
47	Pax7nGFP_Dll4-007.nd2	26.2	2452.41		471.673	12357.8		1633.57		775.033	20305.9
48	Pax7nGFP_Dll4-007.nd2	27.07	3015.34		1034.6	28006.7		1960.98		1102.44	29843.1
49	Pax7nGFP_Dll4-007.nd2	27.72	2836.19		855.453	23713.2		1949.49		1090.95	30241.2
50	Pax7nGFP_Dll4-007.nd2	24.76	2619.74		639.003	15821.7		2102.39		1243.85	30797.8
51	Pax7nGFP_Dll4-008.nd2	19.17	2586.64	1885.69	700.947	13437.1		1460.61	619.737	840.873	16119.5
52	Pax7nGFP_Dll4-008.nd2	24.52	2973.67		1087.98	26677.2		2111.33		1491.59	36573.9
53	Pax7nGFP_Dll4-008.nd2	26.67	2828.79		943.097	25152.4		1779.65		1159.91	30934.9
54	Pax7nGFP_Dll4-008.nd2	28.98	2922.59		1036.9	30049.3		2415.96		1796.22	52054.6
55	Pax7nGFP_Dll4-008.nd2	25.91	2566.25		680.557	17633.2		1525.17		905.433	23459.8
56	Pax7nGFP_Dll4-008.nd2	19.51	2341.61		455.917	8894.93		1494.83		875.093	17073.1
57	Pax7nGFP_Dll4-008.nd2	23.97	2868.18		982.487	23550.2		1802.33		1182.59	28346.8
58	Pax7nGFP_Dll4-008.nd2	25.99	2554.02		668.327	17369.8		1318.35		698.613	18157
59	Pax7nGFP_Dll4-008.nd2	26.2	2502.47		616.777	16159.5		1516.46		896.723	23494.2
60	Pax7nGFP_Dll4-008.nd2	26.07	2566.28		680.587	17742.9		1488.04		868.303	22636.7
61	Pax7nGFP_Dll4-008.nd2	22.4	2429.21		543.517	12174.8		1635.78		1016.04	22759.4
62	Pax7nGFP_Dll4-009.nd2	17.89	2733.91	1676.78	1057.13	18912.1		1407.29	579.157	828.133	14815.3
63	Pax7nGFP_Dll4-009.nd2	18.1	2695.64		1018.86	18441.4		1911.74		1332.58	24119.8
64	Pax7nGFP_Dll4-009.nd2	19.51	2404.08		727.3	14189.6		1441.67		862.513	16827.6
65	Pax7nGFP_Dll4-009.nd2	18.75	2814.73		1137.95	21336.6		1520.79		941.633	17655.6
66	Pax7nGFP_Dll4-009.nd2	19.88	2504.06		827.28	16446.3		1590.4		1011.24	20103.5
67	Pax7nGFP_Dll4-009.nd2	18.39	2459.51		782.73	14394.4		2108.94		1529.78	28132.7
68	Pax7nGFP_Dll4-009.nd2	19.93	2665.19		988.41	19699		1424.66		845.503	16850.9
69	Pax7nGFP_Dll4-009.nd2	18.1	1867.88		191.1	3458.91		1023.18		444.023	8036.82
70	Pax7nGFP_Dll4-009.nd2	19.91	2217.41		540.63	10763.9		1406.19		827.033	16466.2
71	Pax7nGFP_Dll4-009.nd2	19.93	2082.57		405.79	8087.39		1151.71		572.553	11411
72	Pax7nGFP_Dll4-009.nd2	19.93	2591.39		914.61	18228.2		1290.97		711.813	14186.4
73	Pax7nGFP_Dll4-009.nd2	17.91	2164.97		488.19	8743.48		1193.27		614.113	10998.8
74	Pax7nGFP_Dll4-009.nd2	17.44	2016.32		339.54	5921.58		1252.2		673.043	11737.9
75	Pax7nGFP_Dll4-009.nd2	13.72	2052.78		376	5158.72		1288.07		708.913	9726.29
76	Pax7nGFP_Dll4-009.nd2	19.85	1780.42		103.64	2057.25		997.84		418.683	8310.86
77	Pax7nGFP_Dll4-009.nd2	18.73	2003.13		326.35	6112.54		1304.76		725.603	13590.6
78	Pax7nGFP_Dll4-009.nd2	22.82	2490.28		813.5	18564.1		1219.54		640.383	14613.5
79	Pax7nGFP_Dll4-010.nd2	33.02	2713.93	1876.8	837.127	27641.9		1225.98	666.96	559.02	18458.8
80	Pax7nGFP_Dll4-010.nd2	26.31	2622.54		745.737	19620.3		1575.47		908.51	23902.9
81	Pax7nGFP_Dll4-010.nd2	25.6	2363.35		486.547	12455.6		1240.81		573.85	14690.6
82	Pax7nGFP_Dll4-010.nd2	27.04	2347.97		471.167	12740.3		1282.81		615.85	16652.6
83	Pax7nGFP_Dll4-010.nd2	18.65	2233.91		357.107	6660.04		1131.43		464.47	8662.37
84	Pax7nGFP_Dll4-010.nd2	27.43	2216.5		339.697	9317.88		1225.28		558.32	15314.7
85	Pax7nGFP_Dll4-010.nd2	26.44	2604.1		727.297	19229.7		1415.41		748.45	19789
86	Pax7nGFP_Dll4-010.nd2	37.3	2218.4		341.597	12741.6		1249.66		582.7	21734.7
87	Pax7nGFP_Dll4-010.nd2	35.43	2121.44		244.637	8667.48		1291.22		624.26	22117.5
88	Pax7nGFP_Dll4-011.nd2	18.6	2559.01	1639.25	919.757	17107.5		1567.79	623.86	943.93	17557.1
89	Pax7nGFP_Dll4-011.nd2	24.81	2321.05		681.797	16915.4		1430.22		806.36	20005.8
90	Pax7nGFP_Dll4-011.nd2	28.54	2351.32		712.067	20322.4		1487.85		863.99	24658.3
91	Pax7nGFP_Dll4-011.nd2	24.47	2630.13		990.877	24246.8		1621.2		997.34	24404.9
92	Pax7nGFP_Dll4-011.nd2	21.72	2564.18		924.927	20089.4		1291.47		667.61	14500.5
93	Pax7nGFP_Dll4-011.nd2	26.49	2295.34		656.087	17379.7		1622.32		998.46	26449.2
94	Pax7nGFP_Dll4-012.nd2	13.09	2034.54	1421.57	612.973	8023.82		2209.15	541.903	1667.25	21824.3
95	Pax7nGFP_Dll4-012.nd2	19.09	2271.17		849.603	16218.9		1570.71		1028.81	19639.9
96	Pax7nGFP_Dll4-012.nd2	17.34	2094.84		673.273	11674.6		1293.92		752.017	13040
97	Pax7nGFP_Dll4-012.nd2	18.15	2525.77		1104.2	20041.3		1983.26		1441.36	26160.6
98	Pax7nGFP_Dll4-012.nd2	20.22	2306.46		884.893	17892.5		1252.92		711.017	14376.8
99	Pax7nGFP_Dll4-012.nd2	19.3	2292.19		870.623	16803		1302.27		760.367	14675.1
100	Pax7nGFP_Dll4-012.nd2	18.46	2097.78		676.213	12482.9		1299.76		757.857	13990
101	Pax7nGFP_Dll4-012.nd2	19.09	2170.65		749.083	14300		1305.42		763.517	14575.5
102	Pax7nGFP_Dll4-012.nd2	20.33	2572.19		1150.62	23392.2		1712		1170.1	23788.1
103	Pax7nGFP_Dll4-013.nd2	18.73	2769.75	1790.56	979.193	18340.3		2103.16	769.513	1333.65	24979.2
104	Pax7nGFP_Dll4-013.nd2	16.6	2805.86		1015.3	16854		1994.81		1225.3	20339.9
105	Pax7nGFP_Dll4-013.nd2	24.71	2760.71		970.153	23972.5		1919.44		1149.93	28414.7
106	Pax7nGFP_Dll4-013.nd2	26.73	2818.99		1028.43	27490		1665.59		896.077	23952.1
107	Pax7nGFP_Dll4-013.nd2	19.88	2197.34		406.783	8086.85		1496.01		726.497	14442.8
108	Pax7nGFP_Dll4-013.nd2	20.43	2283.31		492.753	10067		1836.33		1066.82	21795.1
109	Pax7nGFP_Dll4-013.nd2	18.46	2614.58		824.023	15211.5		1939.82		1170.31	21603.9
110	Pax7nGFP_Dll4-013.nd2	23.16	2612.22		821.663	19029.7		1593.08		823.567	19073.8
111	Pax7nGFP_Dll4-013.nd2	26.54	2750.72		960.163	25482.7		1596.29		826.777	21942.7
112	Pax7nGFP_Dll4-014.nd2	20.82	2474.76	1838.45	636.313	13248		1979.16	883.783	1095.38	22805.7
113	Pax7nGFP_Dll4-014.nd2	16.55	2585.14		746.693	12357.8		2704.15		1820.37	30127.1
114	Pax7nGFP_Dll4-014.nd2	17.42	2438.14		599.693	10446.7		1573.74		689.957	12019
115	Pax7nGFP_Dll4-014.nd2	27.93	3217.54		1379.09	38518.1		2231.04		1347.26	37628.9
116	Pax7nGFP_Dll4-014.nd2	23.74	2596.07		757.623	17986		1491.77		607.987	14433.6
117	Pax7nGFP_Dll4-014.nd2	25.62	2939.14		1100.69	28199.8		2433.04		1549.26	39692
118	Pax7nGFP_Dll4-014.nd2	27.25	2707.03		868.583	23668.9		1894.58		1010.8	27544.2
119	Pax7nGFP_Dll4-014.nd2	25.34	2268.19		429.743	10889.7		1332.7		448.917	11375.5
120	Pax7nGFP_Dll4-014.nd2	26.8	2299.69		461.243	12361.3		1618.82		735.037	19699
121	Pax7nGFP_Dll4-014.nd2	24.79	2372.38		533.933	13236.2		1449.83		566.047	14032.3
122	Pax7nGFP_Dll4-014.nd2	27.3	2490.8		652.353	17809.2		1808.99		925.207	25258.1
123	Pax7nGFP_Dll4-015.nd2	23.71	2348.12	1967.49	380.627	9024.66		1464.7	862.023	602.677	14289.5
124	Pax7nGFP_Dll4-015.nd2	19.67	2226.87		259.377	5101.94		1128.34		266.317	5238.45
125	Pax7nGFP_Dll4-015.nd2	22.69	2687.82		720.327	16344.2		1734.61		872.587	19799
126	Pax7nGFP_Dll4-015.nd2	26.33	2407.81		440.317	11593.5		1575.05		713.027	18774
127	Pax7nGFP_Dll4-016.nd2	20.56	2700.18	1971.37	728.813	14984.4		2253.83	924.673	1329.16	27327.5
128	Pax7nGFP_Dll4-016.nd2	21.87	2553.56		582.193	12732.6		1645.05		720.377	15754.6
129	Pax7nGFP_Dll4-016.nd2	29.24	2028.23		56.8633	1662.68		1356.23		431.557	12618.7
130	Pax7nGFP_Dll4-016.nd2	34.7	2360.27		388.903	13494.9		1713.7		789.027	27379.2
131	Pax7nGFP_Dll4-017.nd2	22.03	2947.85	2003.66	944.193	20800.6		1622.71	920.21	702.5	15476.1
132	Pax7nGFP_Dll4-017.nd2	40.26	2903.34		899.683	36221.3		1857.33		937.12	37728.5
133	Pax7nGFP_Dll4-017.nd2	22.06	3164.18		1160.52	25601.1		2388.17		1467.96	32383.2
134	Pax7nGFP_Dll4-017.nd2	24.92	2679.35		675.693	16838.3		1606.36		686.15	17098.9
135	Pax7nGFP_Dll4-017.nd2	28.46	2494.1		490.443	13958		1687.36		767.15	21833.1
136	Pax7nGFP_Dll4-018.nd2	20.41	2687.49	1864.95	822.537	16788		2290.38	921.97	1368.41	27929.2
137	Pax7nGFP_Dll4-018.nd2	28.9	2595.15		730.197	21102.7		1680.62		758.65	21925
138	Pax7nGFP_Dll4-018.nd2	22.71	2252.38		387.427	8798.46		1576.43		654.46	14862.8
139	Pax7nGFP_Dll4-018.nd2	31.21	2268.1		403.147	12582.2		1451.82		529.85	16536.6
140	Pax7nGFP_Dll4-019.nd2	19.36	2910.98	1910.14	1000.84	19376.2		2142.52	765.913	1376.61	26651.1
141	Pax7nGFP_Dll4-019.nd2	23.34	3432.76		1522.62	35537.9		1852.74		1086.83	25366.5
142	Pax7nGFP_Dll4-019.nd2	18.12	2810.98		900.837	16323.2		1730.32		964.407	17475

## Sheet: Pax7nGFP vs Dll4_mouse2
Item	Source	Area [µm²]	MeanTXRed (Dll4)	TxRed background intensity	Mean Dll4 intensity	Sum Dll4 intensity		MeanGFP (Pax7-nGFP)	GFP background intensity	Mean Pax7-nGFP intensity	Sum Pax7-nGFP intensity
1	Pax7nGFP_Dll4-001.nd2	18.99	2425.23	1902.39	522.84	9928.73		1481.06	707.895	773.165	14682.4
2	Pax7nGFP_Dll4-001.nd2	26.91	2050.45		148.06	3984.29		892.91		185.015	4978.75
3	Pax7nGFP_Dll4-001.nd2	29.35	2645.18		742.79	21800.9		1390.07		682.175	20021.8
4	Pax7nGFP_Dll4-001.nd2	24.39	2148.14		245.75	5993.84		1006.36		298.465	7279.56
5	Pax7nGFP_Dll4-001.nd2	29.79	2394.86		492.47	14670.7		1220.78		512.885	15278.8
6	Pax7nGFP_Dll4-001.nd2	27.75	2430.12		527.73	14644.5		1087.25		379.355	10527.1
7	Pax7nGFP_Dll4-002.nd2	16.94	2310.32	1742.22	568.097	9623.56		1283.56	614.827	668.733	11328.3
8	Pax7nGFP_Dll4-002.nd2	18.73	2070.33		328.107	6145.44		1219.13		604.303	11318.6
9	Pax7nGFP_Dll4-002.nd2	21.11	2775.54		1033.32	21813.3		1401.41		786.583	16604.8
10	Pax7nGFP_Dll4-002.nd2	24.63	2518.43		776.207	19118		1171.97		557.143	13722.4
11	Pax7nGFP_Dll4-002.nd2	23.97	2533.64		791.417	18970.3		1081.64		466.813	11189.5
12	Pax7nGFP_Dll4-002.nd2	25.49	2264.74		522.517	13318.9		1030.28		415.453	10589.9
13	Pax7nGFP_Dll4-002.nd2	22.27	2180.85		438.627	9768.22		1232.92		618.093	13764.9
14	Pax7nGFP_Dll4-002.nd2	27.98	2843.89		1101.67	30824.6		1705.55		1090.72	30518.4
15	Pax7nGFP_Dll4-002.nd2	26.96	2322.02		579.797	15631.3		1467.03		852.203	22975.4
16	Pax7nGFP_Dll4-002.nd2	25.57	2240.89		498.667	12750.9		1036.18		421.353	10774
17	Pax7nGFP_Dll4-002.nd2	23.84	2118.91		376.687	8980.21		1167.05		552.223	13165
18	Pax7nGFP_Dll4-002.nd2	21.9	2122.7		380.477	8332.44		920.19		305.363	6687.46
19	Pax7nGFP_Dll4-002.nd2	24.68	2118.43		376.207	9284.78		1038.14		423.313	10447.4
20	Pax7nGFP_Dll4-002.nd2	25.99	2529.57		787.347	20463.1		1271.31		656.483	17062
21	Pax7nGFP_Dll4-002.nd2	25.89	2205.39		463.167	11991.4		1144.23		529.403	13706.3
22	Pax7nGFP_Dll4-002.nd2	26.1	2387.99		645.767	16854.5		1242.24		627.413	16375.5
23	Pax7nGFP_Dll4-002.nd2	26.96	2119.75		377.527	10178.1		1155.94		541.113	14588.4
24	Pax7nGFP_Dll4-002.nd2	27.09	2586.97		844.747	22884.2		1235.4		620.573	16811.3
25	Pax7nGFP_Dll4-002.nd2	27.57	2298.99		556.767	15350.1		1305.9		691.073	19052.9
26	Pax7nGFP_Dll4-002.nd2	23.53	2211.81		469.587	11049.4		1239.45		624.623	14697.4
27	Pax7nGFP_Dll4-002.nd2	28.59	2677.7		935.477	26745.3		1684.83		1070	30591.4
28	Pax7nGFP_Dll4-002.nd2	27.91	2152.56		410.337	11452.5		1544.86		930.033	25957.2
29	Pax7nGFP_Dll4-003.nd2	21.01	2234.06	1750.98	483.08	10149.5		1581.3	842.837	738.463	15515.1
30	Pax7nGFP_Dll4-003.nd2	22.53	2325.58		574.6	12945.7		1506.94		664.103	14962.2
31	Pax7nGFP_Dll4-003.nd2	25.89	2545.63		794.65	20573.5		1754.14		911.303	23593.6
32	Pax7nGFP_Dll4-003.nd2	27.46	3369.36		1618.38	44440.7		1819.15		976.313	26809.6
33	Pax7nGFP_Dll4-003.nd2	22.9	2754		1003.02	22969.2		1741.48		898.643	20578.9
34	Pax7nGFP_Dll4-003.nd2	21.35	2208.56		457.58	9769.33		1941.55		1098.71	23457.5
35	Pax7nGFP_Dll4-003.nd2	20.51	2431.95		680.97	13966.7		1326.69		483.853	9923.83
36	Pax7nGFP_Dll4-003.nd2	19.67	2350.43		599.45	11791.2		1634.44		791.603	15570.8
37	Pax7nGFP_Dll4-003.nd2	21.11	2347.79		596.81	12598.7		1647.22		804.383	16980.5
38	Pax7nGFP_Dll4-003.nd2	21.4	2023.58		272.6	5833.64		1372.24		529.403	11329.2
39	Pax7nGFP_Dll4-003.nd2	22.48	2390.33		639.35	14372.6		1828.08		985.243	22148.3
40	Pax7nGFP_Dll4-003.nd2	21.77	2223.64		472.66	10289.8		1299.39		456.553	9939.16
41	Pax7nGFP_Dll4-003.nd2	19.51	2414.15		663.17	12938.4		1288.28		445.443	8690.59
42	Pax7nGFP_Dll4-004.nd2	26.78	2410.54	1820.46	590.077	15802.3		1259.58	700.19	559.39	14980.5
43	Pax7nGFP_Dll4-004.nd2	28.75	3000.18		1179.72	33916.9		1934.8		1234.61	35495
44	Pax7nGFP_Dll4-004.nd2	20.46	1971.81		151.347	3096.55		1131.48		431.29	8824.19
45	Pax7nGFP_Dll4-004.nd2	26.41	2211.08		390.617	10316.2		1139.86		439.67	11611.7
46	Pax7nGFP_Dll4-005.nd2	17.62	2644.13	1787.02	857.11	15102.3		1980.5	869.31	1111.19	19579.2
47	Pax7nGFP_Dll4-005.nd2	21.3	2507.43		720.41	15344.7		1746.26		876.95	18679
48	Pax7nGFP_Dll4-005.nd2	22.08	2844.81		1057.79	23356		1652.27		782.96	17287.8
49	Pax7nGFP_Dll4-005.nd2	21.3	3265.88		1478.86	31499.7		1687.69		818.38	17431.5
50	Pax7nGFP_Dll4-005.nd2	23.53	3051.53		1264.51	29753.9		1770.7		901.39	21209.7
51	Pax7nGFP_Dll4-005.nd2	25.39	2399.57		612.55	15552.6		1708.14		838.83	21297.9
52	Pax7nGFP_Dll4-005.nd2	23.24	3082.5		1295.48	30107		1956.61		1087.3	25268.9
53	Pax7nGFP_Dll4-005.nd2	21.22	2504.47		717.45	15224.3		1608.53		739.22	15686.2
54	Pax7nGFP_Dll4-005.nd2	20.88	2049.62		262.6	5483.09		1491.35		622.04	12988.2
55	Pax7nGFP_Dll4-005.nd2	20.22	1985.28		198.26	4008.82		1328.58		459.27	9286.44
56	Pax7nGFP_Dll4-006.nd2	22.08	3019.23	1896.95	1122.28	24779.9		1657.39	612.293	1045.1	23075.7
57	Pax7nGFP_Dll4-006.nd2	23.47	2246.87		349.92	8212.62		1098.65		486.357	11414.8
58	Pax7nGFP_Dll4-006.nd2	24.76	2321.27		424.32	10506.2		1189.57		577.277	14293.4
59	Pax7nGFP_Dll4-006.nd2	23.95	2646.11		749.16	17942.4		1194.37		582.077	13940.7
60	Pax7nGFP_Dll4-006.nd2	26.86	2527.9		630.95	16947.3		1376.41		764.117	20524.2
61	Pax7nGFP_Dll4-006.nd2	21.61	2267.88		370.93	8015.8		1092.39		480.097	10374.9
62	Pax7nGFP_Dll4-007.nd2	16.34	2817.67	1871.11	946.56	15466.8		1548.84	716.87	831.97	13594.4
63	Pax7nGFP_Dll4-007.nd2	14.84	2134.48		263.37	3908.41		1311.16		594.29	8819.26
64	Pax7nGFP_Dll4-007.nd2	22.06	2802.5		931.39	20546.5		1565.09		848.22	18711.7
65	Pax7nGFP_Dll4-007.nd2	21.43	2769.62		898.51	19255.1		1429.73		712.86	15276.6
66	Pax7nGFP_Dll4-008.nd2	15.5	2466.95	1700.68	766.273	11877.2		1972.14	822.77	1149.37	17815.2
67	Pax7nGFP_Dll4-008.nd2	19.85	3216.04		1515.36	30080		1944.44		1121.67	22265.1
68	Pax7nGFP_Dll4-008.nd2	19.83	2233.18		532.503	10559.5		1417.96		595.19	11802.6
69	Pax7nGFP_Dll4-008.nd2	14.03	2041.09		340.413	4776		1126.16		303.39	4256.56
70	Pax7nGFP_Dll4-009.nd2	21.48	2632.29	1431.13	1201.16	25800.8		1465.37	734.837	730.533	15691.9
71	Pax7nGFP_Dll4-009.nd2	21.4	2234.91		803.777	17200.8		1735.1		1000.26	21405.6
72	Pax7nGFP_Dll4-009.nd2	21.27	2092.54		661.407	14068.1		1418.57		683.733	14543
73	Pax7nGFP_Dll4-009.nd2	21.85	2015.41		584.277	12766.4		1272.02		537.183	11737.5
74	Pax7nGFP_Dll4-009.nd2	17.34	2110.32		679.187	11777.1		1567.34		832.503	14435.6
75	Pax7nGFP_Dll4-009.nd2	20.48	1732.16		301.027	6165.03		1121.29		386.453	7914.56
76	Pax7nGFP_Dll4-009.nd2	24.21	1842.93		411.797	9969.6		1341.27		606.433	14681.8
77	Pax7nGFP_Dll4-009.nd2	15.68	1695.68		264.547	4148.09		1255.14		520.303	8158.36
78	Pax7nGFP_Dll4-009.nd2	22.61	1854.44		423.307	9570.96		1234.24		499.403	11291.5
79	Pax7nGFP_Dll4-010.nd2	20.61	2529.83	1593.3	936.527	19301.8		1429.55	647.847	781.703	16110.9
80	Pax7nGFP_Dll4-010.nd2	24.21	1957.07		363.767	8806.79		1014.99		367.143	8888.54
81	Pax7nGFP_Dll4-010.nd2	27.85	2285.77		692.467	19285.2		1237.17		589.323	16412.7
82	Pax7nGFP_Dll4-011.nd2	14.37	2685.21	1813.09	872.123	12532.4		1189.56	558.383	631.177	9070.01
83	Pax7nGFP_Dll4-011.nd2	29.95	3266.52		1453.43	43530.3		1875.91		1317.53	39459.9
84	Pax7nGFP_Dll4-011.nd2	31.21	3259.89		1446.8	45154.7		1438.72		880.337	27475.3
85	Pax7nGFP_Dll4-011.nd2	23.13	2741.63		928.543	21477.2		1612.62		1054.24	24384.5
86	Pax7nGFP_Dll4-011.nd2	24.13	2404.15		591.063	14262.4		1120.27		561.887	13558.3
87	Pax7nGFP_Dll4-011.nd2	25.91	2747.6		934.513	24213.2		1008.41		450.027	11660.2
88	Pax7nGFP_Dll4-012.nd2	14.32	2277.81	1563.18	714.627	10233.5		1218.5	536.23	682.27	9770.11
89	Pax7nGFP_Dll4-012.nd2	20.77	2780.14		1216.96	25276.2		1323.39		787.16	16349.3
90	Pax7nGFP_Dll4-012.nd2	21.66	2600.12		1036.94	22460		1280.52		744.29	16121.3
91	Pax7nGFP_Dll4-012.nd2	19.88	2394.97		831.787	16535.9		1307.78		771.55	15338.4
92	Pax7nGFP_Dll4-012.nd2	21.06	2162.04		598.857	12611.9		1087.42		551.19	11608.1
93	Pax7nGFP_Dll4-012.nd2	19.09	2230.97		667.787	12748		837.89		301.66	5758.69
94	Pax7nGFP_Dll4-012.nd2	19.67	2054.91		491.727	9672.26		726.73		190.5	3747.14
95	Pax7nGFP_Dll4-013.nd2	19.75	2786.89	1796.55	990.34	19559.2		1447.99	603.653	844.337	16675.6
96	Pax7nGFP_Dll4-013.nd2	17.47	2162.38		365.83	6391.05		1696.46		1092.81	19091.3
97	Pax7nGFP_Dll4-013.nd2	20.51	2561.05		764.5	15679.9		1537.41		933.757	19151.3
98	Pax7nGFP_Dll4-013.nd2	22.69	2491.56		695.01	15769.8		1293.57		689.917	15654.2
99	Pax7nGFP_Dll4-013.nd2	26.12	3053.63		1257.08	32834.9		1361.19		757.537	19786.9
100	Pax7nGFP_Dll4-013.nd2	22.66	2369.52		572.97	12983.5		1207.85		604.197	13691.1
101	Pax7nGFP_Dll4-013.nd2	22.45	2564.15		767.6	17232.6		1152.93		549.277	12331.3
102	Pax7nGFP_Dll4-013.nd2	18.23	2351.03		554.48	10108.2		1178.02		574.367	10470.7
103	Pax7nGFP_Dll4-013.nd2	22.95	2244.73		448.18	10285.7		1254.18		650.527	14929.6
104	Pax7nGFP_Dll4-014.nd2	20.04	2604.5	1577.64	1026.86	20578.3		1750.05	636.133	1113.92	22322.9
105	Pax7nGFP_Dll4-014.nd2	17.02	2064.14		486.5	8280.23		1277.56		641.427	10917.1
106	Pax7nGFP_Dll4-014.nd2	20.8	2253.45		675.81	14056.8		1240.96		604.827	12580.4
107	Pax7nGFP_Dll4-014.nd2	24.16	2918.48		1340.84	32394.7		1719.86		1083.73	26182.8
108	Pax7nGFP_Dll4-014.nd2	21.01	1778.22		200.58	4214.19		905.95		269.817	5668.85
109	Pax7nGFP_Dll4-014.nd2	21.3	2439.3		861.66	18353.4		1434.15		798.017	16997.8
110	Pax7nGFP_Dll4-014.nd2	27.83	2736.48		1158.84	32250.5		1518.45		882.317	24554.9
111	Pax7nGFP_Dll4-014.nd2	27.75	2107.44		529.8	14701.9		1177.1		540.967	15011.8
112	Pax7nGFP_Dll4-015.nd2	22.79	2779.54	1662.51	1117.03	25457.1		1713.29	577.263	1136.03	25890
113	Pax7nGFP_Dll4-015.nd2	18.75	2115.3		452.79	8489.81		853.86		276.597	5186.19
114	Pax7nGFP_Dll4-015.nd2	18.57	2082.43		419.92	7797.91		1240.48		663.217	12315.9
115	Pax7nGFP_Dll4-015.nd2	26.23	3048.09		1385.58	36343.8		1829.4		1252.14	32843.5
116	Pax7nGFP_Dll4-015.nd2	21.64	3086.27		1423.76	30810.2		1309.77		732.507	15851.4
117	Pax7nGFP_Dll4-015.nd2	25.62	2988.07		1325.56	33960.8		1445.05		867.787	22232.7
118	Pax7nGFP_Dll4-015.nd2	26.18	2715.33		1052.82	27562.8		978.33		401.067	10499.9
119	Pax7nGFP_Dll4-015.nd2	19.72	2019.5		356.99	7039.84		1132.75		555.487	10954.2
120	Pax7nGFP_Dll4-015.nd2	26.1	2805.05		1142.54	29820.3		1365.58		788.317	20575.1
121	Pax7nGFP_Dll4-015.nd2	26.8	2282.98		620.47	16628.6		1280.53		703.267	18847.5
122	Pax7nGFP_Dll4-016.nd2	25.6	2900	1592.28	1307.72	33477.6		1834.58	635.847	1198.73	30687.6
123	Pax7nGFP_Dll4-016.nd2	25.6	2416.25		823.97	21093.6		1434.3		798.453	20440.4
124	Pax7nGFP_Dll4-016.nd2	27.83	3298.62		1706.34	47487.4		1927.2		1291.35	35938.4
125	Pax7nGFP_Dll4-016.nd2	22.53	2452.03		859.75	19370.2		1067.49		431.643	9724.92
126	Pax7nGFP_Dll4-016.nd2	21.59	2336.03		743.75	16057.6		1380.9		745.053	16085.7
127	Pax7nGFP_Dll4-016.nd2	23.5	2125.04		532.76	12519.9		1284.55		648.703	15244.5
128	Pax7nGFP_Dll4-018.nd2	14.06	1839.61	1651.52	188.093	2644.59		1341.01	615.267	725.743	10204
129	Pax7nGFP_Dll4-018.nd2	14.53	1812.4		160.883	2337.63		1048.09		432.823	6288.92
130	Pax7nGFP_Dll4-018.nd2	17.6	2410.35		758.833	13355.5		1138.87		523.603	9215.42
131	Pax7nGFP_Dll4-018.nd2	20.22	2378.06		726.543	14690.7		1379.73		764.463	15457.4
132	Pax7nGFP_Dll4-019.nd2	14.5	2560.44	1640.76	919.683	13335.4		1934.07	805.18	1128.89	16368.9
133	Pax7nGFP_Dll4-019.nd2	13.85	2028.22		387.463	5366.37		1257.75		452.57	6268.09
134	Pax7nGFP_Dll4-019.nd2	22.32	2391.8		751.043	16763.3		1439.31		634.13	14153.8
135	Pax7nGFP_Dll4-019.nd2	20.54	2063.96		423.203	8692.6		1459.91		654.73	13448.2
136	Pax7nGFP_Dll4-019.nd2	22	2051.66		410.903	9039.87		1448.01		642.83	14142.3
137	Pax7nGFP_Dll4-020.nd2	22.95	2644.52	1745.22	899.303	20639		1252.82	591.067	661.753	15187.2
138	Pax7nGFP_Dll4-020.nd2	17.97	2414.16		668.943	12020.9		1304.65		713.583	12823.1
139	Pax7nGFP_Dll4-020.nd2	22.71	2537.81		792.593	17999.8		1300.18		709.113	16104
140	Pax7nGFP_Dll4-020.nd2	32.18	2664.75		919.533	29590.6		1433.28		842.213	27102.4
141	Pax7nGFP_Dll4-020.nd2	30.16	2649.37		904.153	27269.3		1277.26		686.193	20695.6
142	Pax7nGFP_Dll4-020.nd2	31.45	2427.38		682.163	21454		1111.04		519.973	16353.2
143	Pax7nGFP_Dll4-020.nd2	32.26	2550.4		805.183	25975.2		1456.95		865.883	27933.4
144	Pax7nGFP_Dll4-020.nd2	33.55	2171.15		425.933	14290.1		933.95		342.883	11503.7

## Sheet: Pax7nGFP vs Dll4_mouse3
Item	Source	Area [µm²]	MeanTXRed (Dll4)	TxRed background intensity	Mean Dll4 intensity	Sum Dll4 intensity		MeanGFP (Pax7-nGFP)	GFP background intensity	Mean Pax7-nGFP intensity	Sum Pax7-nGFP intensity
1	Pax7nGFP_Dll4-021.nd2	20.77	2998.34	1840.07	1158.27	24057.2		1489.34	645.75	843.59	17521.4
2	Pax7nGFP_Dll4-021.nd2	33.44	2670.43		830.357	27767.1		1527.99		882.24	29502.1
3	Pax7nGFP_Dll4-021.nd2	30.97	2797.77		957.697	29659.9		1701.51		1055.76	32696.9
4	Pax7nGFP_Dll4-021.nd2	28.27	2680.79		840.717	23767.1		1579.05		933.3	26384.4
5	Pax7nGFP_Dll4-021.nd2	26.2	2546.89		706.817	18518.6		1463.26		817.51	21418.8
6	Pax7nGFP_Dll4-021.nd2	30.37	2264.02		423.947	12875.3		1226.23		580.48	17629.2
7	Pax7nGFP_Dll4-021.nd2	31.92	2189.01		348.937	11138.1		1256.91		611.16	19508.2
8	Pax7nGFP_Dll4-022.nd2	23.13	2104.61	1813.82	290.79	6725.97		1417.29	774.15	643.14	14875.8
9	Pax7nGFP_Dll4-022.nd2	21.14	2879.63		1065.81	22531.2		1662.5		888.35	18779.7
10	Pax7nGFP_Dll4-022.nd2	30	3467.88		1654.06	49621.8		1690.13		915.98	27479.4
11	Pax7nGFP_Dll4-022.nd2	27.43	2887.26		1073.44	29444.5		1858.01		1083.86	29730.3
12	Pax7nGFP_Dll4-022.nd2	32.08	2008.41		194.59	6242.45		1098.51		324.36	10405.5
13	Pax7nGFP_Dll4-023.nd2	19.62	2687.68	1710.94	976.74	19163.6		1799.37	847.61	951.76	18673.5
14	Pax7nGFP_Dll4-023.nd2	21.03	2526.48		815.54	17150.8		1818.38		970.77	20415.3
15	Pax7nGFP_Dll4-023.nd2	23.95	2396.53		685.59	16419.9		1539.89		692.28	16580.1
16	Pax7nGFP_Dll4-023.nd2	27.41	3098.87		1387.93	38043.2		1761.91		914.3	25061
17	Pax7nGFP_Dll4-023.nd2	25.78	2788.93		1077.99	27790.6		1806.58		958.97	24722.2
18	Pax7nGFP_Dll4-023.nd2	25.89	2811.42		1100.48	28491.4		1705.06		857.45	22199.4
19	Pax7nGFP_Dll4-023.nd2	28.98	3175.71		1464.77	42449		1926.16		1078.55	31256.4
20	Pax7nGFP_Dll4-023.nd2	26.18	2694.81		983.87	25757.7		1887.45		1039.84	27223
21	Pax7nGFP_Dll4-023.nd2	26.41	2692.14		981.2	25913.5		1851.41		1003.8	26510.4
22	Pax7nGFP_Dll4-023.nd2	25.89	2897.34		1186.4	30715.9		1695.92		848.31	21962.7
23	Pax7nGFP_Dll4-023.nd2	27.2	2739.18		1028.24	27968.1		1886.52		1038.91	28258.4
24	Pax7nGFP_Dll4-023.nd2	25.13	2470.9		759.96	19097.8		1585.94		738.33	18554.2
25	Pax7nGFP_Dll4-023.nd2	25.73	2359.26		648.32	16681.3		1763.41		915.8	23563.5
26	Pax7nGFP_Dll4-023.nd2	28.61	2195.81		484.87	13872.1		1503.99		656.38	18779
27	Pax7nGFP_Dll4-023.nd2	28.8	2064.7		353.76	10188.3		1265.3		417.69	12029.5
28	Pax7nGFP_Dll4-024.nd2	24.18	2230.58	1431.61	798.973	19319.2		1345.27	490.17	855.1	20676.3
29	Pax7nGFP_Dll4-024.nd2	30.58	2688.96		1257.35	38449.9		1539.46		1049.29	32087.3
30	Pax7nGFP_Dll4-024.nd2	19.85	1754.69		323.083	6413.2		1121.89		631.72	12539.6
31	Pax7nGFP_Dll4-024.nd2	17.73	2255.97		824.363	14616		873.47		383.3	6795.91
32	Pax7nGFP_Dll4-024.nd2	28.98	2495.4		1063.79	30828.7		1291.01		800.84	23208.3
33	Pax7nGFP_Dll4-024.nd2	25.94	2198.1		766.493	19882.8		1815.31		1325.14	34374.1
34	Pax7nGFP_Dll4-024.nd2	30.53	2378.7		947.093	28914.8		1248.69		758.52	23157.6
35	Pax7nGFP_Dll4-024.nd2	29.19	2012.16		580.553	16946.4		1030.63		540.46	15776
36	Pax7nGFP_Dll4-024.nd2	33.78	2316.23		884.623	29882.6		990.54		500.37	16902.5
37	Pax7nGFP_Dll4-024.nd2	34.2	1805.13		373.523	12774.5		1044.16		553.99	18946.5
38	Pax7nGFP_Dll4-025.nd2	15.66	1821.31	1563.43	257.883	4038.45		1127.42	828.623	298.797	4679.16
39	Pax7nGFP_Dll4-025.nd2	19.75	2541.37		977.943	19314.4		1433.2		604.577	11940.4
40	Pax7nGFP_Dll4-025.nd2	20.46	2468.23		904.803	18512.3		1778.76		950.137	19439.8
41	Pax7nGFP_Dll4-025.nd2	18.2	2391.06		827.633	15062.9		1501.46		672.837	12245.6
42	Pax7nGFP_Dll4-025.nd2	24.02	2480.48		917.053	22027.6		1748.54		919.917	22096.4
43	Pax7nGFP_Dll4-025.nd2	22.32	2377.73		814.303	18175.3		1483.02		654.397	14606.1
44	Pax7nGFP_Dll4-025.nd2	24.65	2479.46		916.033	22580.2		1519.1		690.477	17020.2
45	Pax7nGFP_Dll4-025.nd2	20.51	2364.21		800.783	16424.1		1197.56		368.937	7566.89
46	Pax7nGFP_Dll4-025.nd2	22.19	2334.42		770.993	17108.3		1691.07		862.447	19137.7
47	Pax7nGFP_Dll4-025.nd2	19.01	2109.25		545.823	10376.1		1564.24		735.617	13984.1
48	Pax7nGFP_Dll4-025.nd2	19.54	2124.2		560.773	10957.5		1230.42		401.797	7851.11
49	Pax7nGFP_Dll4-025.nd2	24.42	2627.26		1063.83	25978.8		1392.16		563.537	13761.6
50	Pax7nGFP_Dll4-025.nd2	20.77	1891.95		328.523	6823.43		1201.7		373.077	7748.8
51	Pax7nGFP_Dll4-025.nd2	19.75	2228.61		665.183	13137.4		1166.06		337.437	6664.37
52	Pax7nGFP_Dll4-025.nd2	25.44	2187.27		623.843	15870.6		1290.88		462.257	11759.8
53	Pax7nGFP_Dll4-025.nd2	23.05	2070.82		507.393	11695.4		1293.58		464.957	10717.3
54	Pax7nGFP_Dll4-025.nd2	23.95	2301.53		738.103	17677.6		1415.39		586.767	14053.1
55	Pax7nGFP_Dll4-025.nd2	20.93	1910.32		346.893	7260.48		1433.97		605.347	12669.9
56	Pax7nGFP_Dll4-025.nd2	19.36	1801.44		238.013	4607.94		1014.89		186.267	3606.12
57	Pax7nGFP_Dll4-026.nd2	16.84	2551.4	1417.15	1134.25	19100.7		1361.53	792.877	568.653	9576.12
58	Pax7nGFP_Dll4-026.nd2	19.67	2169.1		751.947	14790.8		1834.7		1041.82	20492.7
59	Pax7nGFP_Dll4-026.nd2	13.4	1366.34		-50.8133	-680.899		1238.51		445.633	5971.49
60	Pax7nGFP_Dll4-026.nd2	20.12	2040.75		623.597	12546.8		1763.68		970.803	19532.6
61	Pax7nGFP_Dll4-026.nd2	26.83	2367.82		950.667	25506.4		1764.65		971.773	26072.7
62	Pax7nGFP_Dll4-026.nd2	16.84	2178.65		761.497	12823.6		1573.73		780.853	13149.6
63	Pax7nGFP_Dll4-026.nd2	21.19	2179.7		762.547	16158.4		1816.92		1024.04	21699.5
64	Pax7nGFP_Dll4-026.nd2	29.9	2420.77		1003.62	30008.1		1477.61		684.733	20473.5
65	Pax7nGFP_Dll4-026.nd2	19.15	2104.27		687.117	13158.3		1371.63		578.753	11083.1
66	Pax7nGFP_Dll4-026.nd2	23.68	2279.46		862.307	20419.4		1689.4		896.523	21229.7
67	Pax7nGFP_Dll4-026.nd2	32.18	2113.87		696.717	22420.3		1442.09		649.213	20891.7
68	Pax7nGFP_Dll4-026.nd2	28.19	2076.43		659.277	18585		1276.82		483.943	13642.4
69	Pax7nGFP_Dll4-026.nd2	19.67	1959.21		542.057	10662.3		1467.47		674.593	13269.3
70	Pax7nGFP_Dll4-026.nd2	32.92	1919.78		502.627	16546.5		1257.95		465.073	15310.2
71	Pax7nGFP_Dll4-026.nd2	30.56	1874.75		457.597	13984.2		1013.23		220.353	6734
72	Pax7nGFP_Dll4-026.nd2	30.92	2153.84		736.687	22778.4		1270.52		477.643	14768.7
73	Pax7nGFP_Dll4-026.nd2	20.61	1681.42		264.267	5446.54		1019.17		226.293	4663.91
74	Pax7nGFP_Dll4-026.nd2	28.43	2011.3		594.147	16891.6		1304.64		511.763	14549.4
75	Pax7nGFP_Dll4-026.nd2	29.09	2120.35		703.197	20456		1589.13		796.253	23163
76	Pax7nGFP_Dll4-026.nd2	20.98	1870.83		453.677	9518.14		1893.83		1100.95	23098
77	Pax7nGFP_Dll4-026.nd2	22.5	1723.22		306.067	6886.5		1194.65		401.773	9039.9
78	Pax7nGFP_Dll4-027.nd2	25.05	2865.85	1809.22	1056.63	26468.6		1608.04	862.257	745.783	18681.9
79	Pax7nGFP_Dll4-027.nd2	23.42	2841.22		1032	24169.4		1919.33		1057.07	24756.6
80	Pax7nGFP_Dll4-027.nd2	21.69	2913.08		1103.86	23942.7		1354.03		491.773	10666.6
81	Pax7nGFP_Dll4-027.nd2	23.32	2905.39		1096.17	25562.7		1494.15		631.893	14735.7
82	Pax7nGFP_Dll4-027.nd2	28.8	3333.98		1524.76	43913.1		1899.35		1037.09	29868.3
83	Pax7nGFP_Dll4-027.nd2	21.4	2564.4		755.18	16160.9		1570.03		707.773	15146.3
84	Pax7nGFP_Dll4-027.nd2	27.22	2784		974.78	26533.5		1436.65		574.393	15635
85	Pax7nGFP_Dll4-027.nd2	21.9	2886.99		1077.77	23603.2		1341.34		479.083	10491.9
86	Pax7nGFP_Dll4-027.nd2	28.22	2706.32		897.1	25316.2		1434.89		572.633	16159.7
87	Pax7nGFP_Dll4-027.nd2	22.37	2605.21		795.99	17806.3		1780.05		917.793	20531
88	Pax7nGFP_Dll4-027.nd2	24.08	2597.91		788.69	18991.7		1481.21		618.953	14904.4
89	Pax7nGFP_Dll4-027.nd2	23.63	2501.34		692.12	16354.8		1321.41		459.153	10849.8
90	Pax7nGFP_Dll4-027.nd2	24.65	2635.12		825.9	20358.4		1881.39		1019.13	25121.6
91	Pax7nGFP_Dll4-027.nd2	19.67	1962.8		153.58	3020.92		1107.92		245.663	4832.19
92	Pax7nGFP_Dll4-027.nd2	24.73	2411.24		602.02	14888		1532.79		670.533	16582.3
93	Pax7nGFP_Dll4-027.nd2	25.62	2480.64		671.42	17201.8		1439.37		577.113	14785.6
94	Pax7nGFP_Dll4-027.nd2	25.36	2284.91		475.69	12063.5		1565.32		703.063	17829.7
95	Pax7nGFP_Dll4-027.nd2	30.37	2495.47		686.25	20841.4		1358.3		496.043	15064.8
96	Pax7nGFP_Dll4-028.nd2	20.61	2841.2	1749.53	1091.67	22499.2		1774.88	860.27	914.61	18850.1
97	Pax7nGFP_Dll4-028.nd2	22.74	2603.69		854.157	19423.5		1339.34		479.07	10894.1
98	Pax7nGFP_Dll4-028.nd2	17.73	2448.34		698.807	12389.8		1650.2		789.93	14005.5
99	Pax7nGFP_Dll4-028.nd2	22.29	2895.63		1146.1	25546.5		1863.95		1003.68	22372
100	Pax7nGFP_Dll4-028.nd2	23.63	3264.96		1515.43	35809.5		1956.52		1096.25	25904.4
101	Pax7nGFP_Dll4-028.nd2	22.14	2735.48		985.947	21828.9		1674.28		814.01	18022.2
102	Pax7nGFP_Dll4-028.nd2	26.1	2415.03		665.497	17369.5		1486.25		625.98	16338.1
103	Pax7nGFP_Dll4-028.nd2	19.96	2055.36		305.827	6104.3		1408.54		548.27	10943.5
104	Pax7nGFP_Dll4-028.nd2	21.06	2489.62		740.087	15586.2		1887.93		1027.66	21642.5
105	Pax7nGFP_Dll4-028.nd2	26.46	2471.13		721.597	19093.4		1477.22		616.95	16324.5
106	Pax7nGFP_Dll4-028.nd2	27.96	2729.03		979.497	27386.7		1756.96		896.69	25071.5
107	Pax7nGFP_Dll4-028.nd2	22.63	2813.58		1064.05	24079.4		1852.75		992.48	22459.8
108	Pax7nGFP_Dll4-028.nd2	27.22	2729.37		979.837	26671.2		1563.34		703.07	19137.6
109	Pax7nGFP_Dll4-028.nd2	24.18	2101.77		352.237	8517.08		1252.37		392.1	9480.98
110	Pax7nGFP_Dll4-028.nd2	24.84	2717.52		967.987	24044.8		1623.31		763.04	18953.9
111	Pax7nGFP_Dll4-028.nd2	25.6	2138.15		388.617	9948.59		1193.78		333.51	8537.86
112	Pax7nGFP_Dll4-029.nd2	23.16	3087.61	1657.48	1430.13	33121.9		1724.64	865.307	859.333	19902.2
113	Pax7nGFP_Dll4-029.nd2	22.16	2737.69		1080.21	23937.5		1957.09		1091.78	24193.9
114	Pax7nGFP_Dll4-029.nd2	24.37	2512.02		854.543	20825.2		1581.27		715.963	17448
115	Pax7nGFP_Dll4-029.nd2	29.56	2356.89		699.413	20674.7		1942.8		1077.49	31850.7
116	Pax7nGFP_Dll4-029.nd2	22.58	2277.67		620.193	14004		1535.21		669.903	15126.4
117	Pax7nGFP_Dll4-029.nd2	32.57	2683.67		1026.19	33423.1		2043.01		1177.7	38357.8
118	Pax7nGFP_Dll4-029.nd2	27.17	1960.16		302.683	8223.91		1153.61		288.303	7833.2
119	Pax7nGFP_Dll4-029.nd2	33.13	2703.45		1045.97	34653.1		1604.51		739.203	24489.8
120	Pax7nGFP_Dll4-029.nd2	25.49	2259.67		602.193	15349.9		1770.4		905.093	23070.8
121	Pax7nGFP_Dll4-029.nd2	34.46	2388.6		731.123	25194.5		1638.32		773.013	26638
122	Pax7nGFP_Dll4-030.nd2	25.02	2592.53	1564.64	1027.89	25717.7		1551.83	856.183	695.647	17405.1
123	Pax7nGFP_Dll4-030.nd2	26.78	2892.81		1328.17	35568.3		1836.49		980.307	26252.6
124	Pax7nGFP_Dll4-030.nd2	25.2	1817.38		252.737	6368.97		1435.88		579.697	14608.4
125	Pax7nGFP_Dll4-030.nd2	27.38	2208.2		643.557	17620.6		1792.12		935.937	25626
126	Pax7nGFP_Dll4-030.nd2	31.16	2728.43		1163.79	36263.6		1995.52		1139.34	35501.7
127	Pax7nGFP_Dll4-030.nd2	21.8	2151.93		587.287	12802.9		1491.57		635.387	13851.4
128	Pax7nGFP_Dll4-030.nd2	40.71	2690.6		1125.96	45837.7		1756.44		900.257	36649.5
129	Pax7nGFP_Dll4-030.nd2	33.86	2257.86		693.217	23472.3		1271.5		415.317	14062.6
130	Pax7nGFP_Dll4-030.nd2	36.14	2086.27		521.627	18851.6		1414.55		558.367	20179.4
131	Pax7nGFP_Dll4-030.nd2	38.76	2027.88		463.237	17955.1		1244.95		388.767	15068.6
132	Pax7nGFP_Dll4-030.nd2	30.08	2745.27		1180.63	35513.3		1880.33		1024.15	30806.3
133	Pax7nGFP_Dll4-030.nd2	34.33	2180.86		616.217	21154.7		1501.22		645.037	22144.1
134	Pax7nGFP_Dll4-030.nd2	31.74	2539.75		975.107	30949.9		1283.14		426.957	13551.6
135	Pax7nGFP_Dll4-030.nd2	46.32	2215.66		651.017	30155.1		1740.88		884.697	40979.2
