# Supplementary material for: Heterogeneous levels of delta-like 4 within a multinucleated niche cell maintains muscle stem cell diversity
Source: eLife. 2022 Dec 30;11:e68180. doi: 10.7554/eLife.68180 (PMC9803355; doi:10.7554/eLife.68180)
Supplement: Figure 2—source data 5. [file elife-68180-fig2-data5.xlsx]

## Sheet: qPCR data
WT Single muscle Fibers, RNA extraction by Trizol and cDNA synthesized									Relative Gene Expression
qPCR results									ΔCT= CT GOI/CT GAPDH
Sample	CT GAPDH	CT Dll1	ΔCT	= 2-ΔCT	Mean	Std Dev
WT-1	21.626	39.0278	1.80467	0.286246	0.298	0.0102628
	21.6244	37.2943	1.72464	0.302574
	21.5209	36.8493	1.71226	0.305182
WT-2	21.6606	35.5342	1.6405	0.320746	0.308791	0.0124026
	21.5361	37.8262	1.7564	0.295985
	21.5309	36.4158	1.69133	0.309642
WT-3	20.1318	32.3545	1.60714	0.328249	0.330577	0.003809
	19.8647	31.9026	1.60599	0.328509
	20.2587	31.9659	1.57789	0.334973
WT-4	19.589	31.9378	1.63039	0.323	0.323041	0.00376262
	19.4099	31.9685	1.64702	0.319299
	19.7535	31.8707	1.61342	0.326824
Sample	CT GAPDH	CT Dll4 (F1R1)	ΔCT	= 2-ΔCT	Mean	Std Dev
WT-1	21.626	35.0401	1.62028	0.325273	0.322868	0.00216662
	21.6244	35.4435	1.63905	0.321067
	21.5209	35.1582	1.63368	0.322266
WT-2	21.6606	36.2583	1.67393	0.313399	0.314461	0.00628486
	21.5361	35.2852	1.63842	0.321209
	21.5309	36.503	1.69538	0.308774
WT-3	20.1318	30.2478	1.50249	0.352944	0.351344	0.00357444
	19.8647	30.3127	1.52596	0.347249
	20.2587	30.3644	1.49884	0.353839
WT-4	19.589	30.143	1.53877	0.344178	0.344295	0.00159131
	19.4099	29.9826	1.54471	0.342766
	19.7535	30.2505	1.5314	0.345942
Sample	CT GAPDH	CT Dll4 (F2R2)	ΔCT	= 2-ΔCT	Mean	Std Dev
WT-1	21.626	35.8467	1.65758	0.316971	0.314516	0.0102347
	21.6244	35.2272	1.62905	0.3233
	21.5209	37.0436	1.72129	0.303278
WT-2	21.6606	36.3095	1.67629	0.312886	0.320362	0.012255
	21.5361	36.0205	1.67256	0.313696
	21.5309	34.0166	1.5799	0.334506
WT-3	20.1318	30.5638	1.51819	0.349123	0.347558	0.00418331
	19.8647	30.6807	1.54449	0.342818
	20.2587	30.6221	1.51156	0.350733
WT-4	19.589	30.3631	1.55001	0.341507	0.341645	0.00386176
	19.4099	30.3868	1.56553	0.337853
	19.7535	30.2809	1.53294	0.345573
Sample	CT GAPDH	CT Jag1	ΔCT	= 2-ΔCT	Mean	Std Dev
WT-1	21.626	39.774	1.83918	0.279481	0.287801	0.00724217
	21.6244	38.4861	1.77976	0.291232
	21.5209	38.1469	1.77256	0.29269
WT-2	21.6606	37.314	1.72266	0.302989	0.326055	0.0326204
	21.5361
	21.5309	32.6882	1.5182	0.349121
WT-3	20.1318	32.8669	1.63259	0.322509	0.321805	0.00266187
	19.8647	32.7568	1.649	0.318862
	20.2587	32.9353	1.62574	0.324044
WT-4	19.589	32.3968	1.65383	0.317796	0.313852	0.00353286
	19.4099	32.5459	1.67677	0.312782
	19.7535	33.2871	1.68512	0.310977
Sample	CT GAPDH	CT Jag2	ΔCT	= 2-ΔCT	Mean	Std Dev
WT-1	21.626	34.8233	1.61025	0.327541	0.321193	0.0056606
	21.6244	35.8738	1.65895	0.316669
	21.5209	35.4385	1.6467	0.319369
WT-2	21.6606	34.6775	1.60095	0.32966	0.324441	0.00481106
	21.5361	35.0663	1.62825	0.32348
	21.5309	35.3759	1.64303	0.320183
WT-3	20.1318	30.6659	1.52326	0.347899	0.347542	0.00175357
	19.8647	30.446	1.53267	0.345637
	20.2587	30.7594	1.51833	0.349089
WT-4	19.589	29.9318	1.52799	0.34676	0.3459	0.00538263
	19.4099	30.198	1.5558	0.340139
	19.7535	29.853	1.51127	0.350801
-RTs
WT-1	GAPDH	Undetermined
WT-2	GAPDH	Undetermined
WT-3	GAPDH	Undetermined
WT-4	GAPDH	Undetermined
WT-1	Dll1	Undetermined
WT-2	Dll1	Undetermined
WT-3	Dll1	Undetermined
WT-4	Dll1	Undetermined
WT-1	Dll4-1	Undetermined
WT-2	Dll4-1	Undetermined
WT-3	Dll4-1	Undetermined
WT-4	Dll4-1	Undetermined
WT-1	Dll4-2	Undetermined
WT-2	Dll4-2	Undetermined
WT-3	Dll4-2	Undetermined
WT-4	Dll4-2	Undetermined
WT-1	Jag1	Undetermined
WT-2	Jag1	Undetermined
WT-3	Jag1	Undetermined
WT-4	Jag1	Undetermined
WT-1	Jag2	Undetermined
WT-2	Jag2	Undetermined
WT-3	Jag2	Undetermined
WT-4	Jag2	Undetermined
