# Supplementary material for: Heterogeneous levels of delta-like 4 within a multinucleated niche cell maintains muscle stem cell diversity
Source: eLife. 2022 Dec 30;11:e68180. doi: 10.7554/eLife.68180 (PMC9803355; doi:10.7554/eLife.68180)
Supplement: Figure 2—source data 7. [file elife-68180-fig2-data7.xlsx]

## Sheet: mouse1
Item	Source	Mean intensity of Pax7 (Cy5)	Cy5 channel background	Mean intensity of Pax7			No. of Dll4 transcripts one cell diameter away from SC
1	WT_mouse1_Dll4 transcripts_Pax7_GFP-001	1357.23	636.17	721.06			40
2	WT_mouse1_Dll4 transcripts_Pax7_GFP-003	1744.44	909.84	834.6			24
3	WT_mouse1_Dll4 transcripts_Pax7_GFP-005	1294.89	773.33	521.56			19
4	WT_mouse1_Dll4 transcripts_Pax7_GFP-007	1280.66	628.14	652.52			15
5	WT_mouse1_Dll4 transcripts_Pax7_GFP-009	1018.06	628.09	389.97			20
6	WT_mouse1_Dll4 transcripts_Pax7_GFP-011	1220.15	461.76	758.39			75
7	WT_mouse1_Dll4 transcripts_Pax7_GFP-013	1135.4	677.7	457.7			29
8	WT_mouse1_Dll4 transcripts_Pax7_GFP-015	1000.03	457.31	542.72			24
9	WT_mouse1_Dll4 transcripts_Pax7_GFP-017	1480.35	749.29	731.06			25
10	WT_mouse1_Dll4 transcripts_Pax7_GFP-019	1233.57	639.74	593.83			46
11	WT_mouse1_Dll4 transcripts_Pax7_GFP-021	1528.2	846.36	681.84			17
12	WT_mouse1_Dll4 transcripts_Pax7_GFP-023	1595.52	684.8	910.72			34
13	WT_mouse1_Dll4 transcripts_Pax7_GFP-025	696.15	544.3	151.85			8
14	WT_mouse1_Dll4 transcripts_Pax7_GFP-027	1210.13	619.23	590.9			8
15	WT_mouse1_Dll4 transcripts_Pax7_GFP-029	1831.85	1178.58	653.27			15
16	WT_mouse1_Dll4 transcripts_Pax7_GFP-031	1316.24	819.33	496.91			10
17	WT_mouse1_Dll4 transcripts_Pax7_GFP-033	1327.53	882.22	445.31			16
18	WT_mouse1_Dll4 transcripts_Pax7_GFP-035	1445.45	965.02	480.43			14
19	WT_mouse1_Dll4 transcripts_Pax7_GFP-037	1065.28	659.32	405.96			11
20	WT_mouse1_Dll4 transcripts_Pax7_GFP-039	1482.04	1024.56	457.48			18
21	WT_mouse1_Dll4 transcripts_Pax7_GFP-041	1431.44	948.95	482.49			9
22	WT_mouse1_Dll4 transcripts_Pax7_GFP-043	957.46	617.36	340.1			10
23	WT_mouse1_Dll4 transcripts_Pax7_GFP-045	1191.36	711.84	479.52			19
24	WT_mouse1_Dll4 transcripts_Pax7_GFP-047	1328.87	590.26	738.61			34
25	WT_mouse1_Dll4 transcripts_Pax7_GFP-049	953.53	488.44	465.09			29
26	WT_mouse1_Dll4 transcripts_Pax7_GFP-051	929.32	435.34	493.98			24
27	WT_mouse1_Dll4 transcripts_Pax7_GFP-053	1207.86	542.96	664.9			23
28	WT_mouse1_Dll4 transcripts_Pax7_GFP-055	1032.14	557.99	474.15			40
29	WT_mouse1_Dll4 transcripts_Pax7_GFP-057	1531.69	602.94	928.75			20
30	WT_mouse1_Dll4 transcripts_Pax7_GFP-059	1543.72	677.03	866.69			6
31	WT_mouse1_Dll4 transcripts_Pax7_GFP-061	1487.28	784.14	703.14			16
32	WT_mouse1_Dll4 transcripts_Pax7_GFP-063	1045.46	253.42	792.04			16
33	WT_mouse1_Dll4 transcripts_Pax7_GFP-065	1183.82	537.6	646.22			8
34	WT_mouse1_Dll4 transcripts_Pax7_GFP-067	1091.9	502.97	588.93			48
35	WT_mouse1_Dll4 transcripts_Pax7_GFP-069	960.58	450.23	510.35			34
36	WT_mouse1_Dll4 transcripts_Pax7_GFP-071	1312.25	609.71	702.54			30
37	WT_mouse1_Dll4 transcripts_Pax7_GFP-073	1349.41	500.06	849.35			12
38	WT_mouse1_Dll4 transcripts_Pax7_GFP-075	970.25	520.39	449.86			4
39	WT_mouse1_Dll4 transcripts_Pax7_GFP-077	647.55	301	346.55			6
40	WT_mouse1_Dll4 transcripts_Pax7_GFP-079	782.7	392.32	390.38			24
41	WT_mouse1_Dll4 transcripts_Pax7_GFP-081	790.54	374.26	416.28			12
42	WT_mouse1_Dll4 transcripts_Pax7_GFP-083	1131.36	487.54	643.82			22
43	WT_mouse1_Dll4 transcripts_Pax7_GFP-085	986.83	390.59	596.24			10
44	WT_mouse1_Dll4 transcripts_Pax7_GFP-087	550.61	321.35	229.26			20
45	WT_mouse1_Dll4 transcripts_Pax7_GFP-089	685.14	313.3	371.84			8
46	WT_mouse1_Dll4 transcripts_Pax7_GFP-091	773.8	363.12	410.68			20
47	WT_mouse1_Dll4 transcripts_Pax7_GFP-093	985.11	388.83	596.28			24
48	WT_mouse1_Dll4 transcripts_Pax7_GFP-095	1078.04	506.28	571.76			22
49	WT_mouse1_Dll4 transcripts_Pax7_GFP-097	1051.82	450.41	601.41			14
50	WT_mouse1_Dll4 transcripts_Pax7_GFP-099	846.94	437.35	409.59			24
51	WT_mouse1_Dll4 transcripts_Pax7_GFP-101	782.11	409.47	372.64			16
52	WT_mouse1_Dll4 transcripts_Pax7_GFP-103	1334.56	475.95	858.61			12

## Sheet: mouse2
Item	Source	Mean intensity of Pax7 (Cy5)	Cy5 channel background	Mean intensity of Pax7			No. of Dll4 transcripts one cell diameter away from SC
1	WT_mouse2_Dll4 transcripts_Pax7_GFP-001	1187.45	609.45	578			16
2	WT_mouse2_Dll4 transcripts_Pax7_GFP-002	1307.45	643.57	663.88			19
3	WT_mouse2_Dll4 transcripts_Pax7_GFP-004	917.94	566.03	351.91			5
4	WT_mouse2_Dll4 transcripts_Pax7_GFP-006	1450.55	803.11	647.44			6
5	WT_mouse2_Dll4 transcripts_Pax7_GFP-008	1268.42	710.92	557.5			2
6	WT_mouse2_Dll4 transcripts_Pax7_GFP-008	1531.68	895.14	636.54			22
7	WT_mouse2_Dll4 transcripts_Pax7_GFP-010	1409.72	959.15	450.57			4
8	WT_mouse2_Dll4 transcripts_Pax7_GFP-012	1317.84	864.28	453.56			18
9	WT_mouse2_Dll4 transcripts_Pax7_GFP-014	1241.6	784.72	456.88			26
10	WT_mouse2_Dll4 transcripts_Pax7_GFP-016	2052.49	1272.76	779.73			8
11	WT_mouse2_Dll4 transcripts_Pax7_GFP-018	957.56	495.91	461.65			18
12	WT_mouse2_Dll4 transcripts_Pax7_GFP-020	839.68	455.56	384.12			34
13	WT_mouse2_Dll4 transcripts_Pax7_GFP-022	692.73	391.89	300.84			27
14	WT_mouse2_Dll4 transcripts_Pax7_GFP-024	854.26	434.86	419.4			38
15	WT_mouse2_Dll4 transcripts_Pax7_GFP-026	1081.33	592.5	488.83			15
16	WT_mouse2_Dll4 transcripts_Pax7_GFP-028	1735.99	776.65	959.34			18
17	WT_mouse2_Dll4 transcripts_Pax7_GFP-030	1122.15	680.61	441.54			7
18	WT_mouse2_Dll4 transcripts_Pax7_GFP-032	1383.69	891.79	491.9			3
19	WT_mouse2_Dll4 transcripts_Pax7_GFP-034	1975.27	1010.74	964.53			10
20	WT_mouse2_Dll4 transcripts_Pax7_GFP-036	1196.55	654.65	541.9			12
21	WT_mouse2_Dll4 transcripts_Pax7_GFP-038	1614.07	1323.7	290.37			8
22	WT_mouse2_Dll4 transcripts_Pax7_GFP-040	1307.5	601.2	706.3			21
23	WT_mouse2_Dll4 transcripts_Pax7_GFP-042	1215.91	578.93	636.98			37
24	WT_mouse2_Dll4 transcripts_Pax7_GFP-044	1244.62	511.72	732.9			30
25	WT_mouse2_Dll4 transcripts_Pax7_GFP-046	1007.16	501.61	505.55			49
26	WT_mouse2_Dll4 transcripts_Pax7_GFP-048	1560.24	701.33	858.91			16
27	WT_mouse2_Dll4 transcripts_Pax7_GFP-050	1275.43	642.35	633.08			10
28	WT_mouse2_Dll4 transcripts_Pax7_GFP-052	1660.35	741.27	919.08			12
29	WT_mouse2_Dll4 transcripts_Pax7_GFP-054	1166.59	616.13	550.46			18
30	WT_mouse2_Dll4 transcripts_Pax7_GFP-056	1313.79	474.49	839.3			47
31	WT_mouse2_Dll4 transcripts_Pax7_GFP-058	1690.76	837.41	853.35			12
32	WT_mouse2_Dll4 transcripts_Pax7_GFP-060	1066.03	711.39	354.64			4
33	WT_mouse2_Dll4 transcripts_Pax7_GFP-062	1066.2	748.5	317.7			13
34	WT_mouse2_Dll4 transcripts_Pax7_GFP-064	1226.15	524.96	701.19			21
35	WT_mouse2_Dll4 transcripts_Pax7_GFP-066	1679.59	862.87	816.72			19
36	WT_mouse2_Dll4 transcripts_Pax7_GFP-068	1383.96	719.05	664.91			20
37	WT_mouse2_Dll4 transcripts_Pax7_GFP-070	1294.62	867.19	427.43			16
38	WT_mouse2_Dll4 transcripts_Pax7_GFP-072	1785.75	963.97	821.78			27
39	WT_mouse2_Dll4 transcripts_Pax7_GFP-074	1667.17	695.9	971.27			27
40	WT_mouse2_Dll4 transcripts_Pax7_GFP-076	1083.63	580.12	503.51			16
41	WT_mouse2_Dll4 transcripts_Pax7_GFP-078	698.4	568.64	129.76			24
42	WT_mouse2_Dll4 transcripts_Pax7_GFP-080	1073.93	560.21	513.72			12
43	WT_mouse2_Dll4 transcripts_Pax7_GFP-082	1187.4	747.96	439.44			12
44	WT_mouse2_Dll4 transcripts_Pax7_GFP-084	1261.19	858.62	402.57			3
45	WT_mouse2_Dll4 transcripts_Pax7_GFP-086	1171.49	596.52	574.97			4
46	WT_mouse2_Dll4 transcripts_Pax7_GFP-088	1061.93	646.72	415.21			15
47	WT_mouse2_Dll4 transcripts_Pax7_GFP-090	1430.68	677.53	753.15			15

## Sheet: mouse3
Item	Source	Mean intensity of Pax7 (Cy5)	Cy5 channel background	Mean intensity of Pax7			No. of Dll4 transcripts one cell diameter away from SC
1	WT_mouse3_Dll4 transcripts_Pax7_GFP-001	936.15	439.54	496.61			32
2	WT_mouse3_Dll4 transcripts_Pax7_GFP-003	1101.62	493.56	608.06			18
3	WT_mouse3_Dll4 transcripts_Pax7_GFP-005	1103.3	472.68	630.62			42
4	WT_mouse3_Dll4 transcripts_Pax7_GFP-007	627.85	365.74	262.11			31
5	WT_mouse3_Dll4 transcripts_Pax7_GFP-009	981.99	491.23	490.76			21
6	WT_mouse3_Dll4 transcripts_Pax7_GFP-011	1165	480.84	684.16			69
7	WT_mouse3_Dll4 transcripts_Pax7_GFP-013	1126.66	624.55	502.11			42
8	WT_mouse3_Dll4 transcripts_Pax7_GFP-015	512.43	325.67	186.76			0
9	WT_mouse3_Dll4 transcripts_Pax7_GFP-017	754.09	475.74	278.35			17
10	WT_mouse3_Dll4 transcripts_Pax7_GFP-019	704.34	436.01	268.33			10
11	WT_mouse3_Dll4 transcripts_Pax7_GFP-021	1054.67	287.43	767.24			112
12	WT_mouse3_Dll4 transcripts_Pax7_GFP-023	1084.16	344.56	739.6			106
13	WT_mouse3_Dll4 transcripts_Pax7_GFP-023	1132.99	323.68	809.31			79
14	WT_mouse3_Dll4 transcripts_Pax7_GFP-025	763.02	286.9	476.12			65
15	WT_mouse3_Dll4 transcripts_Pax7_GFP-027	1048.29	351.25	697.04			105
16	WT_mouse3_Dll4 transcripts_Pax7_GFP-029	1081.9	370.79	711.11			28
17	WT_mouse3_Dll4 transcripts_Pax7_GFP-031	743.28	269.58	473.7			123
18	WT_mouse3_Dll4 transcripts_Pax7_GFP-033	1197.06	453.45	743.61			20
19	WT_mouse3_Dll4 transcripts_Pax7_GFP-035	1009.08	532.1	476.98			2
20	WT_mouse3_Dll4 transcripts_Pax7_GFP-037	999.44	462.73	536.71			6
21	WT_mouse3_Dll4 transcripts_Pax7_GFP-039	865.98	434.94	431.04			62
22	WT_mouse3_Dll4 transcripts_Pax7_GFP-041	1051.83	425.03	626.8			74
23	WT_mouse3_Dll4 transcripts_Pax7_GFP-043	933.16	432.73	500.43			61
24	WT_mouse3_Dll4 transcripts_Pax7_GFP-045	1085.56	459.37	626.19			12
25	WT_mouse3_Dll4 transcripts_Pax7_GFP-047	947.68	357.03	590.65			16
26	WT_mouse3_Dll4 transcripts_Pax7_GFP-049	1141.56	436.27	705.29			14
27	WT_mouse3_Dll4 transcripts_Pax7_GFP-051	648.93	336.71	312.22			14
28	WT_mouse3_Dll4 transcripts_Pax7_GFP-053	890.87	432.79	458.08			30
29	WT_mouse3_Dll4 transcripts_Pax7_GFP-055	1201.77	352.92	848.85			24
30	WT_mouse3_Dll4 transcripts_Pax7_GFP-057	720.48	278.24	442.24			56
31	WT_mouse3_Dll4 transcripts_Pax7_GFP-059	786.68	470.26	316.42			8
32	WT_mouse3_Dll4 transcripts_Pax7_GFP-061	631.64	355.45	276.19			10
33	WT_mouse3_Dll4 transcripts_Pax7_GFP-063	1133.1	491.82	641.28			33
34	WT_mouse3_Dll4 transcripts_Pax7_GFP-065	1271.15	609.92	661.23			42
35	WT_mouse3_Dll4 transcripts_Pax7_GFP-067	613.82	351.36	262.46			30
36	WT_mouse3_Dll4 transcripts_Pax7_GFP-069	1304.27	463.23	841.04			20
37	WT_mouse3_Dll4 transcripts_Pax7_GFP-071	1307.24	462.96	844.28			18
38	WT_mouse3_Dll4 transcripts_Pax7_GFP-073	961.46	339.14	622.32			28
39	WT_mouse3_Dll4 transcripts_Pax7_GFP-075	989.16	331.16	658			38
40	WT_mouse3_Dll4 transcripts_Pax7_GFP-077	910.51	375	535.51			26
