# Supplementary material for: Heterogeneous levels of delta-like 4 within a multinucleated niche cell maintains muscle stem cell diversity
Source: eLife. 2022 Dec 30;11:e68180. doi: 10.7554/eLife.68180 (PMC9803355; doi:10.7554/eLife.68180)
Supplement: Figure 2—source data 8. [file elife-68180-fig2-data8.xlsx]

## Sheet: Dll4 captured by SC
Mapping of Dll4 captured by SC
Distance from NMJ (μm)	Mean intensity of Dll4 (GFP) around SC	GFP background intensity	Mean intensity of Dll4 captured by SC
Fiber 1
1085.15	1407.11	804.12	602.99
165.46	1542.3	978.81	563.49
-426.43	934.79	536.13	398.66
-1394.75	1140.9	852.51	288.39
-1621.09	1468.73	506.64	962.09
-1702.65	1418.13	522.01	896.12
Fiber 2
1252.08	1445.08	910.93	534.15
Only one stem cell on this fiber
Fiber 3
2078.46	932.7	495.49	437.21
1966.89	1285.4	561.15	724.25
-309.43	1113.31	569.57	543.74
-1462.64	1134.31	694.24	440.07
-1737.84	1529.1	723.66	805.44
Fiber 4
1841.28	765.25	458.51	306.74
1567.39	919.6	556.48	363.12
117.98	1363.61	651.1	712.51
-139.46	1036.18	497.8	538.38
-710.16	1336.27	642.65	693.62
-754.52	1456.44	791.48	664.96
-1117.72	1349.7	722.12	627.58
-1539.5	1028.04	583.41	444.63
Fiber 5
1303.56	1521.35	906.08	615.27
1005.64	1146.67	644.58	502.09
600.92	1009.51	549.23	460.28
284.79	1296.56	711.63	584.93
151.12	1015.42	600.68	414.74
SCs only on one side of NMJ
Fiber 6
687.36	1307.99	824.27	483.72
55.81	1209.33	808.52	400.81
-93.08	1083.12	718.25	364.87
Fiber 7
1936.77	1231.37	653.4	577.97
1649.05	1104.61	740.54	364.07
1031.33	1402.58	895.68	506.9
673.93	1291.45	925.17	366.28
-140.91	1494.51	835.24	659.27
-466.6	973.55	750.86	222.69
-1049.01	1084.03	600.14	483.89
-1647.61	1522.77	589.29	933.48
-1821.75	1402.16	890.34	511.82
-1990.17	1188.05	464.5	723.55
-2174.78	921.31	564	357.31
Fiber 8
384.08	1276.34	851.73	424.61
88.39	1712.7	776.84	935.86
-1510.36	1337.94	945.68	392.26
-1918.38	1023.7	515.56	508.14
Fiber 9
2258.24	1191.38	627.76	563.62
1875.64	1494.63	1131.42	363.21
1249.74	1983.24	947.79	1035.45
832.05	1861.77	1064.79	796.98
-882.6	1299.35	835.37	463.98
-1788.16	1179.25	548.93	630.32
Fiber 10
1979.01	1273.31	620.85	652.46
1559.61	1126.31	632.52	493.79
1058.51	1283.9	634.62	649.28
319.78	1261.83	667.86	593.97
-924.31	1292.19	875.27	416.92
-1609.46	1292.14	555.52	314.69
-1856.99	1291.62	868.86	422.76
-1960.07	1184.45	869.76	736.62
Fiber 11
1237.05	1332.96	545.97	786.99
864.39	1678.67	879.5	799.17
848.08	2091.83	1223.39	868.44
-63.08	1970.72	1004.08	966.64
Fiber 12
1867.86	1256.86	755.52	501.34
1431.45	1044.23	525.58	518.65
1291.68	991	436.8	554.2
1043.11	627.91	385.31	242.6
716.88	918.08	548.76	369.32
111.45	844.77	471.59	373.18
SCs only on one side of NMJ
Fiber 13
1748.85	1197.41	550.95	646.46
1540.43	1200.5	553.95	646.55
571.87	1058.58	662.64	395.94
234.76	1078.28	686.34	391.94
SCs only on one side of NMJ
Fiber 14
1802.48	794.09	470.51	323.58
1600.91	1160.72	632.87	527.85
1290.55	1487.55	740.59	746.96
1072.86	1686.44	891.84	794.6
-41.29	1299.81	728.37	571.44
-125.96	1546.78	635.09	911.69
-891.56	897.56	606.05	291.51
Fiber 15
508.93	1211.51	779.28	432.23
76.02	1402.31	713	689.31
-234.21	1560.37	931.66	628.71
-800.22	1442.08	903.16	538.92
Fiber 16
1681.16	1489.48	1067.18	422.3
806.84	1519.05	1134.43	384.62
287.41	1349.5	563.53	785.97
-1683.69	952.84	579.99	372.85
-1957.06	1173.22	788.72	384.5
Fiber 17
542.56	1197.74	783.08	414.66
-179.63	1296.41	901.17	395.24
-381.23	1102.08	585.89	516.19
-683.06	932.37	493.29	439.08
-894.14	1219.49	545.71	673.78
-1497.6	1048.71	633.82	414.89
-1791.15	1026.05	588.88	437.17
-1941.45	945.97	527.43	418.54
Fiber 18
1362.29	1132.42	531.04	601.38
1165.53	1270.21	643.76	626.45
477.99	1411.28	753.32	657.96
50.8	2050.93	1156.23	894.7
-154.44	1177	460.27	716.73
-499.86	1944.39	1125.14	819.25
-1834.44	1762.28	702.75	1059.53
Fiber 19
483.61	1567.49	699.38	868.11
-1019.43	1323.3	620.23	703.07
Fiber 20
151.04	1096.78	710.91	385.87
-1427.61	1013.71	781.68	232.03
-1630.04	1124.5	673.02	451.48
-1919.23	891	476.74	414.26
Fiber 21
1576.19	677.99	414.52	263.47
1038.82	1298.7	643.88	654.82
-27.08	968.3	527.98	440.32
-174.25	1266.89	632.23	634.66
-309.3	1073.6	658.58	415.02
-418.3	1371	564.69	806.31
-600.13	1427.43	732.61	694.82

## Sheet: Pax7 expression in SC
Pax7 intensity in SCs along fiber
Distance from NMJ (μm)	Mean intensity of Pax7 (red)	Red background intensity	Mean intensity of Pax7 in SC
Fiber 1
1085.15	1275.72	486.21	789.51
165.46	925.23	485.09	440.14
-426.43	880.42	399.93	480.49
-1394.75	883.34	441.82	441.52
-1621.09	1019.69	459.91	559.78
-1702.65	985.14	442.32	542.82
Fiber 2
1252.08	837.51	453.61	383.9
Only one stem cell on this fiber
Fiber 3
2078.46	585.33	404.34	180.99
1966.89	1008.5	568.9	439.6
-309.43	749.1	459.32	289.78
-1462.64	658.16	428	230.16
-1737.84	958.93	480.55	478.38
Fiber 4
1841.28	603.51	489.79	113.72
1567.39	684.75	547.13	137.62
117.98	830.95	577.32	253.63
-139.46	651.95	478.79	173.16
-710.16	912.76	622.81	289.95
-754.52	737.84	538.4	199.44
-1117.72	807.95	528.91	279.04
-1539.5	577.76	464.51	113.25
Fiber 5
1303.56	924.68	498.45	426.23
1005.64	761.21	448.13	313.08
600.92	741.62	481.77	259.85
284.79	1023.51	591.2	432.31
151.12	680.8	405.09	275.71
SCs only on one side of NMJ
Fiber 6
687.36	1304.08	703.92	600.16
55.81	1049.38	607.71	441.67
-93.08	998.49	518.16	480.33
Fiber 7
1936.77	1164.47	675.86	488.61
1649.05	1053.64	623.93	429.71
1031.33	1184.4	619.96	564.44
673.93	1231.47	736.52	494.95
-140.91	1190.16	717.13	473.03
-466.6	754.6	451.42	303.18
-1049.01	1074.51	601.78	472.73
-1647.61	1679.18	756.21	922.97
-1821.75	1121.47	626.94	494.53
-1990.17	1257.67	628.12	629.55
-2174.78	1261.64	649.78	611.86
Fiber 8
384.08	833.2	625.01	208.19
88.39	959.22	586.12	373.1
-1510.36	756.06	516.14	239.92
-1918.38	1141.27	694.46	446.81
Fiber 9
2258.24	996.88	691.62	305.26
1875.64	1475.69	898.36	577.33
1249.74	1193	506.7	686.3
832.05	1314.64	664.61	650.03
-882.6	1160.14	721.83	438.31
-1788.16	1016.5	598.42	418.08
Fiber 10
1979.01	1159.84	685.57	474.27
1559.61	1057.16	579.31	477.85
1058.51	872.78	562.87	309.91
319.78	1259.24	614.27	644.97
-924.31	1092.91	689.26	403.65
-1609.46	1453.56	635.73	817.83
-1856.99	1035.06	647.85	387.21
-1960.07	1211.93	693.4	518.53
Fiber 11
1237.05	969.33	413.66	555.67
864.39	1249.44	688.2	561.24
848.08	1407.95	747.57	660.38
-63.08	1613.4	912.83	700.57
Fiber 12
1867.86	794.77	507.48	287.29
1431.45	1110.77	576.01	534.76
1291.68	846.68	453.52	393.16
1043.11	862.78	468.09	394.69
716.88	892.21	506.85	385.36
111.45	949.66	470.18	479.48
SCs only on one side of NMJ
Fiber 13
1748.85	1403.86	589.81	814.05
1540.43	1347.95	578.7	769.25
571.87	1129.99	583.27	546.72
234.76	1017.8	552.16	465.64
SCs only on one side of NMJ
Fiber 14
1802.48	942.77	495.85	446.92
1600.91	1082.25	639.03	443.22
1290.55	1673.08	744.65	928.43
1072.86	1462.07	878.41	583.66
-41.29	918.9	702.12	216.78
-125.96	1468.85	712.96	755.89
-891.56	1152.07	575.68	576.39
Fiber 15
508.93	771.92	643.11	128.81
76.02	1354.43	961.83	392.6
-234.21	1104.37	733.86	370.51
-800.22	958.84	709.81	249.03
Fiber 16
1681.16	1355.43	660.58	694.85
806.84	957.38	613.83	343.55
287.41	1208.59	629.69	578.9
-1683.69	858.7	519.44	339.26
-1957.06	902.99	471.84	431.15
Fiber 17
542.56	1490.54	851.17	639.37
-179.63	958.17	541.99	416.18
-381.23	943.71	505.26	438.45
-683.06	854.79	442.18	412.61
-894.14	1316.28	628.17	688.11
-1497.6	1041.59	499.18	542.41
-1791.15	963.72	500.56	463.16
-1941.45	1160.95	529.58	631.37
Fiber 18
1362.29	1124.74	722.98	401.76
1165.53	909.89	458.61	451.28
477.99	1151.81	716.1	435.71
50.8	1103.5	502.8	600.7
-154.44	1304	711.93	592.07
-499.86	845.53	204.81	640.72
-1834.44	1659.25	886.87	772.38
Fiber 19
483.61	1342.61	765.04	577.57
-1019.43	1068.5	694.26	374.24
Fiber 20
151.04	935.36	481.74	453.62
-1427.61	1148.23	729.76	418.47
-1630.04	1204.74	617.33	587.41
-1919.23	949.87	436.58	513.29

## Sheet: Dll4 expression along fiber
Mapping Dll4 intensity along fiber
Distance from NMJ (μm)	Mean intensity of Dll4 (GFP) on fiber	GFP background intensity	Mean intensity of Dll4 on fiber			Background Avg
Fiber 1
1954	1208.34	361.95	846.39			368.11
1800	1483.31		1121.36			441.4
1600	1002.09		640.14			378.34
1400	1429.55		1067.6			328.98
1200	1154.3		792.35			332.5
1000	1266.51		904.56			331.98
800	866.76		504.81			338.43
600	946.81		584.86			399.77
400	1298.62		936.67			374.85
200	917.34		555.39			340.6
0	887.93		525.98			362.68
-200	902.46		540.51			345.72
-400	986.47		624.52			361.947
-600	895.81		533.86
-800	901.91		539.96
-1000	773.07		411.12
-1200	791.3		429.35
-1400	829.48		467.53
-1600	1061.58		699.63
-1800	1203.49		841.54
Fiber 2
2000	665.23	332.01	333.22			299.97
1800	676.18		344.17			260.36
1600	860.63		528.62			330.58
1400	727.37		395.36			328.01
1200	1083.2		751.19			308.79
1000	1188.3		856.29			359.63
800	1067.76		735.75			379.85
600	1568.19		1236.18			372.39
400	1017.41		685.4			288.56
200	1089.54		757.53			298.78
0	754.07		422.06			397.63
-200	732.04		400.03			359.59
-400	1111.21		779.2			332.012
-600	1081.13		749.12
-800	701.31		369.3
-1000	841.29		509.28
-1200	619.47		287.46
-1400	816.65		484.64
-1600	771.33		439.32
-1800	887.14		555.13
Fiber 3
2600	738.85	341.65	397.2			262.72
2400	708.82		367.17			348.96
2200	950.54		608.89			347.85
2000	1061.01		719.36			352.87
1800	763.71		422.06			371.28
1600	752.19		410.54			365.79
1400	982.97		641.32			348.73
1200	953.11		611.46			357.81
1000	756.67		415.02			383.35
800	824.67		483.02			366.11
600	712.28		370.63			331.53
400	808.22		466.57			262.8
200	900.19		558.54			341.65
0	762.83		421.18
-400	722.42		380.77
-600	932.84		591.19
-800	880.1		538.45
-1000	997.17		655.52
-1200	879.29		537.64
-1400	923.58		581.93
-1600	865.57		523.92
-1800	984.01		642.36
-2000	1095.56		753.91
-2200	1031.55		689.9
Fiber 4
2000	970.14	521.1	449.04			413.49
1800	721.35		200.25			344.7
1600	944.4		423.3			513.64
1400	1078		556.9			595.31
1200	1246.29		725.19			531.58
1000	1045.39		524.29			535.71
800	951.45		430.35			607.47
600	1117.63		596.53			640.9
400	1232.12		711.02			641.25
200	1080.34		559.24			487
0	1037.97		516.87			553.63
-200	1245.3		724.2			388.46
-400	997.93		476.83			521.095
-600	962.23		441.13
-800	1316.65		795.55
-1000	1163.82		642.72
-1200	1122.35		601.25
-1400	1176.3		655.2
-1600	1454.31		933.21
-1800	1165.98		644.88
-1940	1281.53		760.43
Fiber 5
2200	941.81	614.06	327.75			466.47
2000	652.97		38.91			411.51
1800	681.3		67.24			385.93
1600	953.58		339.52			607.8
1400	876.78		262.72			675.18
1200	1179.93		565.87			505.14
1000	916.64		302.58			516.63
800	1117.26		503.2			942.96
600	1000.9		386.84			887.54
400	825.05		210.99			530.18
200	800.59		186.53			783.84
0	833.56		219.5			655.52
-200	860.67		246.61			614.058
-400	933.37		319.31
-600	874.52		260.46
-800	800.65		186.59
-1000	759.78		145.72
-1200	1241.16		627.1
-1400	1058.76		444.7
-1600	985.89		371.83
-1800	926.8		312.74
-2000	838.2		224.14
-2170	1079.69		465.63
Fiber 6
1200	1082.93	602.36	480.57			512.94
1000	908.33		305.97			451.52
800	900.86		298.5			620.9
600	1030.06		427.7			630.37
400	1027.1		424.74			741.53
200	919.21		316.85			724.59
0	941.26		338.9			623.86
-200	883.36		281			627.07
-400	759.38		157.02			453.92
-600	908.44		306.08			512.55
-800	929.71		327.35			532.57
-1000	825.73		223.37			796.53
-1200	998.75		396.39			602.362
-1400	869.52		267.16
-1600	837.86		235.5
-1800	831.25		228.89
Fiber 7
2101	870.34	535.474	334.866			501.3
2000	807.67		272.196			439.17
1800	666.28		130.806			496.37
1600	624.69		89.216			545.99
1400	616.16		80.686			550.82
1200	717.54		182.066			549.62
1000	865.44		329.966			396.59
800	945.36		409.886			597.35
600	1092.59		557.116			480.9
400	954.84		419.366			558.03
200	956.75		421.276			654.82
0	873.92		338.446			583.14
-200	1156.61		621.136			548.65
-400	1094.47		558.996			593.89
-600	879.35		343.876			535.474
-800	769.93		234.456
-1000	569.45		33.976
-1200	667.51		132.036
-1400	731.79		196.316
-1600	723.15		187.676
-1800	1086.48		551.006
-2000	872.33		336.856
-2200	858.57		323.096
-2400	814.97		279.496
Fiber 8
2200	988.81	603.129	385.681			542.81
2000	946.68		343.551			633.11
1800	791.37		188.241			750.19
1600	1070.35		467.221			771.81
1400	912.85		309.721			835.33
1200	1055		451.871			689.5
1000	1216.78		613.651			491.94
800	1081.18		478.051			619.13
600	976.09		372.961			593.84
400	1016.53		413.401			504.67
200	1643.94		1040.81			528.13
0	1423.84		820.711			488.11
-200	932.16		329.031			488.76
-400	1206.06		602.931			506.48
-600	1160.23		557.101			603.129
-800	1118.4		515.271
-1000	959.24		356.111
-1200	1175.71		572.581
-1400	1304.7		701.571
-1600	907.77		304.641
-1800	1108.09		504.961
-2000	1405.87		802.741
-2200	1227.75		624.621
Fiber 9
2400	1288.76	550.475	738.285			429.5
2200	1049.17		498.695			523.2
2000	1032.47		481.995			590.34
1800	1418.11		867.635			494.49
1600	1194.44		643.965			560.74
1400	1260.06		709.585			380.14
1200	1425.28		874.805			381.14
1000	1488.55		938.075			568.28
800	1714.51		1164.03			445.6
600	1239.74		689.265			764.55
400	1252.21		701.735			659.8
200	1032.36		481.885			604.82
0	1057.22		506.745			720.1
-200	1421.87		871.395			583.95
-400	1513.94		963.465			550.475
-600	1160.26		609.785
-800	1428.4		877.925
-1000	1371.19		820.715
-1200	813.33		262.855
-1400	993.87		443.395
-1600	1327.42		776.945
-1800	1059.59		509.115
-1966	1025.21		474.735
Fiber 10
2200	1212.3	480.432	731.868			551.35
2000	998.78		518.348			407.82
1800	871.44		391.008			494.49
1600	1123.59		643.158			478.13
1400	817.45		337.018			444.21
1200	943		462.568			463.91
1000	996.53		516.098			405.08
800	864.51		384.078			526.31
600	813.28		332.848			541.74
400	742.78		262.348			497.25
200	983.81		503.378			520.82
0	1017.47		537.038			391.96
-200	739.84		259.408			523.45
-400	1024.48		544.048			479.53
-600	668.14		187.708			480.432
-800	774.47		294.038
-1000	995.55		515.118
-1200	1047.75		567.318
-1400	787.7		307.268
-1600	755.08		274.648
-1800	856.68		376.248
-2000	1243.54		763.108
-2105	1443.58		963.148
Fiber 11
1200	1447.05	560.905	886.145			601.89
1000	1348.94		788.035			764.1
800	1375.48		814.575			518.71
600	1342.89		781.985			413.32
400	1291.57		730.665			547.87
200	1103.48		542.575			463.69
0	1559.73		998.825			488.62
-200	1798.1		1237.19			416.56
-400	1370.2		809.295			597.33
-600	1077.41		516.505			526.56
-800	1570.77		1009.87			644.09
-1000	1369.36		808.455			685.17
-1200	1207.2		646.295			509.91
-1400	1599.55		1038.64			674.85
-1600	1790.35		1229.44			560.905
-1800	1172.66		611.755
-2000	1358.24		797.335
-2200	1193.05		632.145
-2400	1424.93		864.025
Fiber 12
1958	859.26	386.326	472.934			433.09
1800	798.19		411.864			434.28
1600	718.52		332.194			404.53
1400	515.23		128.904			316.7
1200	666.46		280.134			388.19
1000	508.63		122.304			457.01
800	560.26		173.934			312.05
600	584.23		197.904			321.57
400	530.18		143.854			306.18
200	590.98		204.654			393.11
0	725.65		339.324			378.61
-200	523.67		137.344			467.1
-400	635.14		248.814			423.97
-600	537.9		151.574			372.18
-800	651.92		265.594			386.326
-1000	764.64		378.314
-1200	762.43		376.104
-1400	501.43		115.104
-1600	717.75		331.424
-1800	617.16		230.834
-2000	574.45		188.124
Fiber 13
1906	956.3	510.789	445.511			588.74
1800	762.31		251.521			592.63
1600	1025.9		515.111			384.43
1400	1258.48		747.691			442.45
1200	1035.56		524.771			382.38
1000	958.82		448.031			437.74
800	981.54		470.751			459.45
600	875.27		364.481			433.59
400	862.99		352.201			595.88
200	818.84		308.051			695.18
0	777.07		266.281			711.01
-200	843.25		332.461			595.45
-400	883.07		372.281			416.3
-600	892.66		381.871			415.82
-800	892.56		381.771			510.789
-1000	656.59		145.801
-1200	612.45		101.661
-1400	577.55		66.761
-1588	1099.15		588.361
Fiber 14
2000	929.98	557.422	372.558			627.41
1800	853.52		296.098			764.55
1600	899.93		342.508			612.88
1400	1203.65		646.228			448.22
1200	1289.44		732.018			548.93
1000	1326.57		769.148			707.92
800	1147.63		590.208			481.16
600	921.77		364.348			554.91
400	1001.67		444.248			667.33
200	1053.37		495.948			508.75
0	970		412.578			600.52
-200	1571.44		1014.02			389.33
-400	1055.58		498.158			486.24
-600	778.21		220.788			405.76
-800	986.11		428.688			557.422
-1000	940.85		383.428
-1200	947.42		389.998
-1400	910.35		352.928
-1600	765.45		208.028
Fiber 15
1499	1093.64	514.857	578.783			601.05
1400	961.25		446.393			810.36
1200	1243.61		728.753			472.33
1000	1067.11		552.253			444.91
800	899.51		384.653			572.76
600	1386.51		871.653			586.14
400	1002.75		487.893			386.02
200	1518.81		1003.95			523.85
0	1540.67		1025.81			452.75
-200	1413.3		898.443			394.94
-400	1378.78		863.923			460.45
-600	1121.19		606.333			398.62
-800	1627.61		1112.75			640.46
-1000	916.19		401.333			463.36
-1200	970.94		456.083			514.857
-1400	1129.04		614.183
-1600	854.75		339.893
Fiber 16
2000	1001.92	567.567	434.353			824.02
1800	858.91		291.343			755.67
1600	884.8		317.233			720.2
1400	957.56		389.993			510.28
1200	900.26		332.693			559.8
1000	1027.86		460.293			580.31
800	952.88		385.313			502.97
600	1115.21		547.643			465.9
400	1413.5		845.933			400.7
200	1556.32		988.753			484.85
0	1570.82		1003.25			556.63
-200	1137.03		569.463			664.45
-400	1336.04		768.473			397.47
-600	1083.55		515.983			522.69
-800	1270.54		702.973			567.567
-1000	1067.61		500.043
-1200	796.9		229.333
-1400	1001.59		434.023
-1600	1103.22		535.653
-1800	805.58		238.013
-2000	785.7		218.133
-2200	852.95		285.383
-2400	1258.83		691.263
Fiber 17
-2400	1382.43	598.851	783.579			631.66
-2200	998.07		399.219			683.3
-2000	769.97		171.119			524.17
-1800	767.93		169.079			592.01
-1600	722.96		124.109			688.5
-1400	711.04		112.189			737.96
-1200	1457.78		858.929			630.08
-1000	1088.39		489.539			516.95
-800	919.37		320.519			792.44
-600	1059.39		460.539			649.32
-400	774.26		175.409			488.7
-200	959.56		360.709			475.57
0	1003.23		404.379			486.45
200	749.83		150.979			486.81
400	819.45		220.599			598.851
600	813.82		214.969
800	671.62		72.769
971	788.81		189.959
Fiber 18
1600	1053.6	532.996	520.604			771.16
1400	1404.18		871.184			446.83
1200	1338.14		805.144			584.77
1000	1107.29		574.294			729.85
800	1413.62		880.624			570.27
600	1627.62		1094.62			501.95
400	1467.59		934.594			610.51
200	1309.33		776.334			517.36
0	1633.63		1100.63			484.44
-200	1985.74		1452.74			431.29
-400	1623.07		1090.07			383.42
-600	1368.81		835.814			478.94
-800	1484.85		951.854			410.18
-1000	1972.76		1439.76			540.97
-1200	1915.07		1382.07			532.996
-1400	1162.32		629.324
-1600	1363.5		830.504
-1800	1245.91		712.914
-1981	1588.57		1055.57
Fiber 19
2088	1278.75	548.692	730.058			684.61
2000	1151.05		602.358			427.69
1800	1258.5		709.808			659.22
1600	1494.6		945.908			421.43
1400	1443.24		894.548			540.7
1200	1349.53		800.838			424.98
1000	1607.36		1058.67			432.02
800	1554.78		1006.09			452.16
600	1524.03		975.338			605.56
400	1761.81		1213.12			686.45
200	1498.7		950.008			642.31
0	1371.32		822.628			502.79
-200	927.72		379.028			701.34
-400	996.03		447.338			500.43
-600	1271.09		722.398			548.692
-800	1109.28		560.588
-1000	1177.13		628.438
-1200	1130.44		581.748
-1400	1118.16		569.468
-1600	1295.61		746.918
-1779	1149.55		600.858
Fiber 20
1600	889.65	417.038	472.612			530.87
1400	684.3		267.262			527.41
1200	635.1		218.062			469.28
1000	761.81		344.772			407.56
800	833.26		416.222			399.15
600	824.06		407.022			396.17
400	917.2		500.162			351.39
200	868.66		451.622			371.02
0	875.39		458.352			407.73
-200	746.59		329.552			337.11
-400	1036.66		619.622			380.36
-600	1124.66		707.622			444.23
-800	634.43		217.392			354.44
-1000	813.33		396.292			461.81
-1200	657.25		240.212			417.038
-1400	577.71		160.672
-1600	934		516.962
-1800	884.77		467.732
-2000	676.37		259.332
-2153	1223.86		806.822
Fiber 21
2115	638.99	433.851	205.139			399.68
2000	456.56		22.709			365.03
1800	577.61		143.759			418.15
1600	600.7		166.849			410.96
1400	805.08		371.229			499.46
1200	1080.62		646.769			384.87
1000	978.96		545.109			447.91
800	863.63		429.779			509.37
600	908.99		475.139			424.36
400	1014.1		580.249			592.96
200	844.46		410.609			442.71
0	904.28		470.429			448.41
-200	925.95		492.099			366.66
-400	901.51		467.659			363.38
-600	897.93		464.079			433.851
-800	1088.63		654.779
-1000	889.9		456.049
-1200	927.1		493.249
-1400	1104.41		670.559
-1600	1080.98		647.129
-1800	799.77		365.919
-2000	628.31		194.459
-2170	896.74		462.889
