# Supplementary material for: Heterogeneous levels of delta-like 4 within a multinucleated niche cell maintains muscle stem cell diversity
Source: eLife. 2022 Dec 30;11:e68180. doi: 10.7554/eLife.68180 (PMC9803355; doi:10.7554/eLife.68180)
Supplement: Figure 3—source data 1. [file elife-68180-fig3-data1.xlsx]

## Sheet: Ctrl5_031020
Item	Source	Mean Dll4 (green) intensity in fibers
1	C5_Series005_green channel.tif	28.7
2	C5_Series008_green channel.tif	41.66
3	C5_Series011_green channel.tif	189.46
4	C5_Series014_green channel.tif	132.61
5	C5_Series017_green channel.tif	78.91
6	C5_Series020_green channel.tif	146.68
7	C5_Series024_green channel.tif	149.8
8	C5_Series027_green channel.tif	239.64
9	C5_Series034_green channel.tif	81.6
10	C5_Series037_green channel.tif	169.55
11	C5_Series041_green channel.tif	245.68
12	C5_Series045_green channel.tif	41.89
13	C5_Series048_green channel.tif	64.5
14	C5_Series051_green channel.tif	40.74
15	C5_Series054_green channel.tif	55.41
16	C5_Series057_green channel.tif	74.92
17	C5_Series060_green channel.tif	68.13
18	C5_Series063_green channel.tif	110.88
19	C5_Series066_green channel.tif	178.88
20	C5_Series070_green channel.tif	81.53
21	C5_Series006_green channel.tif	179.5
22	C5_Series013_green channel.tif	81.1
23	C5_Series019_green channel.tif	61.62
24	C5_Series024_green channel.tif	68.21
25	C5_Series114_green channel.tif	60.62

## Sheet: Expt3_031020
Item	Source	Mean Dll4 (green) intensity in fibers
1	E3_Series003_green channel.tif	4.83
2	E3_Series007_green channel.tif	6.72
3	E3_Series010_green channel.tif	8.66
4	E3_Series013_green channel.tif	4.7
5	E3_Series016_green channel.tif	2.81
6	E3_Series019_green channel.tif	3.24
7	E3_Series023_green channel.tif	3.35
8	E3_Series026_green channel.tif	8.48
9	E3_Series029_green channel.tif	7.93
10	E3_Series032_green channel.tif	8.73
11	E3_Series036_green channel.tif	10.92
12	E3_Series039_green channel.tif	26.89
13	E3_Series042_green channel.tif	27.19
14	E3_Series045_green channel.tif	20.99
15	E3_Series050_green channel.tif	62.85
16	E3_Series053_green channel.tif	13.65
17	E3_Series056_green channel.tif	47.21
18	E3_Series059_green channel.tif	86.57
19	E3_Series062_green channel.tif	31.68
20	E3_Series065_green channel.tif	26.73
21	E3_Series068_green channel.tif	69.82
22	E3_Series072_green channel.tif	35.75
23	E3_Series075_green channel.tif	34.11
24	E3_Series087_green channel.tif	10.48
25	E3_Series078_green channel.tif	16.52
26	E3_Series081_green channel.tif	21.08
27	E3_Series084_green channel.tif	13.11
28	E3_Series090_green channel.tif	36.02

## Sheet: Ctrl4_041920
Item	Source	Mean Dll4 (green) intensity in fibers
1	C4_Series008_green channel.tif	170.9
2	C4_Series015_green channel.tif	82.72
3	C4_Series019_green channel.tif	91.68
4	C4_Series023_green channel.tif	39.07
5	C4_Series027_green channel.tif	97.36
6	C4_Series032_green channel.tif	92.25
7	C4_Series037_green channel.tif	34.35
8	C4_Series041_green channel.tif	24.65
9	C4_Series045_green channel.tif	26.73
10	C4_Series049_green channel.tif	24.25
11	C4_Series055_green channel.tif	22.64
12	C4_Series059_green channel.tif	11.95
13	C4_Series063_green channel.tif	12.19
14	C4_Series067_green channel.tif	5.64
15	C4_Series072_green channel.tif	25.45
16	C4_Series076_green channel.tif	13.81
17	C4_Series080_green channel.tif	5.05
18	C4_Series084_green channel.tif	14.59
19	C4_Series088_green channel.tif	18.72
20	C4_Series092_green channel.tif	19.43
21	C4_Series097_green channel.tif	18.8
22	C4_Series102_green channel.tif	8.05
23	C4_Series106_green channel.tif	12.45
24	C4_Series110_green channel.tif	7.99
25	C4_Series114_green channel.tif	10.31
26	C4_Series118_green channel.tif	15.3
27	C4_Series122_green channel.tif	13.84
28	C4_Series126_green channel.tif	12.98
29	C4_Series131_green channel.tif	15.48
30	C4_Series136_green channel.tif	13.21
31	C4_Series017_green channel.tif	130.1
32	C4_Series013_green channel.tif	139.05
33	C4_Series008_green channel.tif	186.64

## Sheet: Expt3_041920
Item	Source	Mean Dll4 (green) intensity in fibers
1	E3_Series148_green channel.tif	9.88
2	E3_Series144_green channel.tif	10.38
3	E3_Series140_green channel.tif	9.47
4	E3_Series136_green channel.tif	5.7
5	E3_Series131_green channel.tif	8.23
6	E3_Series127_green channel.tif	13.48
7	E3_Series123_green channel.tif	11.86
8	E3_Series119_green channel.tif	10.25
9	E3_Series114_green channel.tif	8.41
10	E3_Series110_green channel.tif	4.71
11	E3_Series104_green channel.tif	8.63
12	E3_Series099_green channel.tif	10.96
13	E3_Series094_green channel.tif	9.85
14	E3_Series090_green channel.tif	5.07
15	E3_Series086_green channel.tif	11.79
16	E3_Series081_green channel.tif	12
17	E3_Series073_green channel.tif	15.16
18	E3_Series069_green channel.tif	15.63
19	E3_Series065_green channel.tif	13.74
20	E3_Series057_green channel.tif	26.26
21	E3_Series053_green channel.tif	16.45
22	E3_Series047_green channel.tif	12.36
23	E3_Series042_green channel.tif	21.27
24	E3_Series039_green channel.tif	39.68
25	E3_Series035_green channel.tif	77.71
26	E3_Series031_green channel.tif	60.08
27	E3_Series027_green channel.tif	28.26
28	E3_Series023_green channel.tif	24.75
29	E3_Series017_green channel.tif	37.07
30	E3_Series012_green channel.tif	50.46

## Sheet: Expt5_041920
Item	Source	Mean Dll4 (green) intensity in fibers
1	E5_Series028_green channel.tif	27.78
2	E5_Series033_green channel.tif	31.91
3	E5_Series039_green channel.tif	26.46
4	E5_Series043_green channel.tif	19.17
5	E5_Series047_green channel.tif	37.09
6	E5_Series051_green channel.tif	15.5
7	E5_Series054_green channel.tif	24.09
8	E5_Series064_green channel.tif	12.97
9	E5_Series068_green channel.tif	25.61
10	E5_Series072_green channel.tif	24.49
11	E5_Series076_green channel.tif	9.43
12	E5_Series080_green channel.tif	8.69
13	E5_Series084_green channel.tif	14.33
14	E5_Series088_green channel.tif	39.73
15	E5_Series092_green channel.tif	29.6
16	E5_Series095_green channel.tif	34.96
17	E5_Series099_green channel.tif	18.36
18	E5_Series105_green channel.tif	11.6
19	E5_Series110_green channel.tif	36.25
20	E5_Series119_green channel.tif	35.24
21	E5_Series124_green channel.tif	24.01
22	E5_Series128_green channel.tif	31.4

## Sheet: Expt6_041920
Item	Source	Mean Dll4 (green) intensity
1	E6_Series139_green channel.tif	7.04
2	E6_Series135_green channel.tif	7.43
3	E6_Series131_green channel.tif	7.63
4	E6_Series122_green channel.tif	7.56
5	E6_Series114_green channel.tif	10.03
6	E6_Series110_green channel.tif	10.64
7	E6_Series106_green channel.tif	8.51
8	E6_Series102_green channel.tif	7.73
9	E6_Series097_green channel.tif	9.64
10	E6_Series093_green channel.tif	7.2
11	E6_Series089_green channel.tif	7.24
12	E6_Series084_green channel.tif	6.68
13	E6_Series079_green channel.tif	3.93
14	E6_Series074_green channel.tif	4.78
15	E6_Series070_green channel.tif	7.42
16	E6_Series066_green channel.tif	4.29
17	E6_Series059_green channel.tif	20.74
18	E6_Series055_green channel.tif	44.91
19	E6_Series052_green channel.tif	22.03
20	E6_Series044_green channel.tif	13.58
21	E6_Series039_green channel.tif	20.95
22	E6_Series034_green channel.tif	21.1
23	E6_Series030_green channel.tif	28.39
24	E6_Series026_green channel.tif	21.88
25	E6_Series022_green channel.tif	53.19

## Sheet: WT ctrl
Item	Source	Mean Dll4 (green) intensity in fibers
1	WT fibers_012420_Fi1SC1_green channel.tif	122.65
2	WT fibers_012420_Fi2SC1_green channel.tif	92.39
3	WT fibers_012420_Fi2SC2_green channel.tif	109.77
4	WT fibers_012420_Fi2SC3_green channel.tif	28.15
5	WT fibers_012420_Fi3SC1_green channel.tif	56.84
6	WT fibers_012420_Fi3SC1_green channel.tif	58.45
7	WT fibers_012420_Fi3SC2_green channel.tif	60.27
8	WT fibers_012420_Fi4SC1_green channel.tif	20.46
9	WT fibers_012420_Fi4SC2_green channel.tif	48.67
10	WT fibers_012420_Fi5SC1_green channel.tif	55.67
11	WT fibers_012420_Fi5SC2_green channel.tif	39.76
12	WT fibers_012420_Fi5SC2_green channel.tif	44.91
13	WT fibers_012420_Fi5SC3_green channel.tif	69.48
14	WT fibers_020320_Series011_green channel.tif	57.73
15	WT fibers_020320_Series015_green channel.tif	88.36
16	WT fibers_020320_Series020_green channel.tif	73.71
17	WT fibers_020320_Series025_green channel.tif	59.85
18	WT fibers_020320_Series029_green channel.tif	96.8
19	WT fibers_020320_Series033_green channel.tif	101.44
20	WT fibers_020320_Series037_green channel.tif	67.94
21	WT fibers_020320_Series041_green channel.tif	78.4
22	WT fibers_020320_Series045_green channel.tif	31.03
23	WT fibers_020320_Series050_green channel.tif	54.62
24	WT fibers_030220_Series029_green channel.tif	181.755
25	WT fibers_030220_Series024_green channel.tif	165.045
26	WT fibers_030220_Series020_green channel.tif	139.01
27	WT fibers_030220_Series015_green channel.tif	157.661
28	WT fibers_030220_Series011_green channel.tif	197.027
29	WT fibers_030220_Series007_green channel.tif	255.423
30	WT fibers_030220_Series003_green channel.tif	208.364
31	WT fibers_030220_No dll4 image_green channel.tif	105.952
