# Supplementary material for: Heterogeneous levels of delta-like 4 within a multinucleated niche cell maintains muscle stem cell diversity
Source: eLife. 2022 Dec 30;11:e68180. doi: 10.7554/eLife.68180 (PMC9803355; doi:10.7554/eLife.68180)
Supplement: Figure 3—source data 3. [file elife-68180-fig3-data3.xlsx]

## Sheet: Ctrl2_050715
Item	Source	Pax7 (Cy5) mean intensity	Cy5 channel background	Pax7 mean intensity
1	C2_30d p tmx_Pax7-001.nd2	1424.21	584.22	839.99
2	C2_30d p tmx_Pax7-002.nd2	350.62	233.86	116.76
3	C2_30d p tmx_Pax7-003.nd2	425.41	225.89	199.52
4	C2_30d p tmx_Pax7-004.nd2	686.59	272.69	413.9
5	C2_30d p tmx_Pax7-005.nd2	552.96	203.65	349.31
6	C2_30d p tmx_Pax7-005.nd2	694.94	250.08	444.86
7	C2_30d p tmx_Pax7-006.nd2	1095.61	262.53	833.08
8	C2_30d p tmx_Pax7-007.nd2	680.05	245.23	434.82
9	C2_30d p tmx_Pax7-008.nd2	562.04	263.77	298.27
10	C2_30d p tmx_Pax7-009.nd2	658.73	292.64	366.09
11	C2_30d p tmx_Pax7-009.nd2	340.31	208.48	131.83
12	C2_30d p tmx_Pax7-010.nd2	710.06	272.73	437.33
13	C2_30d p tmx_Pax7-011.nd2	659.55	504.55	155
14	C2_30d p tmx_Pax7-012.nd2	756.4	256	500.4
15	C2_30d p tmx_Pax7-012.nd2	920.26	297.82	622.44
16	C2_30d p tmx_Pax7-013.nd2	516.68	289.37	227.31
17	C2_30d p tmx_Pax7-014.nd2	754.38	325.69	428.69
18	C2_30d p tmx_Pax7-015.nd2	377.06	239.83	137.23
19	C2_30d p tmx_Pax7-016.nd2	727.18	392.32	334.86
20	C2_30d p tmx_Pax7-017.nd2	809.82	399.7	410.12
21	C2_30d p tmx_Pax7-018.nd2	656.7	315.46	341.24
22	C2_30d p tmx_Pax7-018.nd2	608.22	264.32	343.9
23	C2_30d p tmx_Pax7-019.nd2	609.91	356.38	253.53
24	C2_30d p tmx_Pax7-020.nd2	744.77	428.98	315.79
25	C2_30d p tmx_Pax7-021.nd2	859.02	272.91	586.11
26	C2_30d p tmx_Pax7-021.nd2	751.8	337.75	414.05
27	C2_30d p tmx_Pax7-022.nd2	805.92	262.73	543.19
28	C2_30d p tmx_Pax7-023.nd2	831.22	325.22	506
29	C2_30d p tmx_Pax7-024.nd2	779.95	350.59	429.36
30	C2_30d p tmx_Pax7-025.nd2	711.15	373.63	337.52
31	C2_30d p tmx_Pax7-026.nd2	753.82	500.28	253.54
32	C2_30d p tmx_Pax7-027.nd2	643.83	306.64	337.19
33	C2_30d p tmx_Pax7-028.nd2	1528.08	574.62	953.46
34	C2_30d p tmx_Pax7-029.nd2	1011.31	400.84	610.47
35	C2_30d p tmx_Pax7-030.nd2	740.25	223.15	517.1
36	C2_30d p tmx_Pax7-031.nd2	717.5	263.8	453.7
37	C2_30d p tmx_Pax7-033.nd2	496.48	204.5	291.98
38	C2_30d p tmx_Pax7-034.nd2	516.04	230.56	285.48
39	C2_30d p tmx_Pax7-035.nd2	601.41	222.74	378.67
40	C2_30d p tmx_Pax7-036.nd2	688.21	225.89	462.32
41	C2_30d p tmx_Pax7-037.nd2	675.24	228.51	446.73
42	C2_30d p tmx_Pax7-038.nd2	872.6	272.65	599.95
43	C2_30d p tmx_Pax7-039.nd2	572.66	221.96	350.7
44	C2_30d p tmx_Pax7-039.nd2	623.46	187.65	435.81
45	C2_30d p tmx_Pax7-040.nd2	601.21	208.64	392.57
46	C2_30d p tmx_Pax7-041.nd2	714.23	204.87	509.36
47	C2_30d p tmx_Pax7-042.nd2	686.78	207.11	479.67
48	C2_30d p tmx_Pax7-042.nd2	754.59	247.91	506.68
49	C2_30d p tmx_Pax7-043.nd2	340.25	174.69	165.56
50	C2_30d p tmx_Pax7-044.nd2	275.51	191.4	84.11
51	C2_30d p tmx_Pax7-045.nd2	849.95	290.07	559.88
52	C2_30d p tmx_Pax7-046.nd2	815.22	345.04	470.18
53	C2_30d p tmx_Pax7-047.nd2	954.38	279.48	674.9
54	C2_30d p tmx_Pax7-048.nd2	394.42	210.94	183.48
55	C2_30d p tmx_Pax7-049.nd2	341.83	228.95	112.88
56	C2_30d p tmx_Pax7-050.nd2	485.22	301.36	183.86
57	C2_30d p tmx_Pax7-051.nd2	599.37	247.12	352.25
58	C2_30d p tmx_Pax7-052.nd2	1145.11	313.5	831.61
59	C2_30d p tmx_Pax7-053.nd2	1097.7	294.02	803.68
60	C2_30d p tmx_Pax7-054.nd2	856.46	326.28	530.18
61	C2_30d p tmx_Pax7-055.nd2	527.78	229.55	298.23
62	C2_30d p tmx_Pax7-055.nd2	574.72	248.84	325.88
63	C2_30d p tmx_Pax7-056.nd2	1229.39	636.35	593.04
64	C2_30d p tmx_Pax7-057.nd2	1083.41	348.9	734.51
65	C2_30d p tmx_Pax7-058.nd2	1047.35	436.95	610.4
66	C2_30d p tmx_Pax7-058.nd2	827	372.05	454.95
67	C2_30d p tmx_Pax7-059.nd2	1038.3	379.4	658.9
68	C2_30d p tmx_Pax7-060.nd2	877.87	348.21	529.66
69	C2_30d p tmx_Pax7-061.nd2	862.34	399.5	462.84

## Sheet: Expt6_050715
Item	Source	Pax7 (Cy5) mean intensity	Cy5 channel background	Pax7 mean intensity
1	E6_30d p tmx_Pax7-001.nd2	247.65	199.76	47.89
2	E6_30d p tmx_Pax7-002.nd2	263.06	222.75	40.31
3	E6_30d p tmx_Pax7-003.nd2	339.62	221.98	117.64
4	E6_30d p tmx_Pax7-004.nd2	469.81	249.34	220.47
5	E6_30d p tmx_Pax7-005.nd2	278.86	224.87	53.99
6	E6_30d p tmx_Pax7-006.nd2	350.27	225.43	124.84
7	E6_30d p tmx_Pax7-007.nd2	333.98	214.68	119.3
8	E6_30d p tmx_Pax7-008.nd2	380	242.81	137.19
9	E6_30d p tmx_Pax7-009.nd2	256.55	190.25	66.3
10	E6_30d p tmx_Pax7-010.nd2	312.81	253.09	59.72
11	E6_30d p tmx_Pax7-011.nd2	522.16	325.23	196.93
12	E6_30d p tmx_Pax7-012.nd2	301.51	253.99	47.52
13	E6_30d p tmx_Pax7-013.nd2	311.19	262.49	48.7
14	E6_30d p tmx_Pax7-014.nd2	414.44	295.71	118.73
15	E6_30d p tmx_Pax7-015.nd2	744.8	335.75	409.05
16	E6_30d p tmx_Pax7-015.nd2	605.39	314.63	290.76
17	E6_30d p tmx_Pax7-016.nd2	882.93	362.74	520.19
18	E6_30d p tmx_Pax7-016.nd2	560.53	242.5	318.03
19	E6_30d p tmx_Pax7-016.nd2	634.81	311.51	323.3
20	E6_30d p tmx_Pax7-018.nd2	537.38	302.81	234.57
21	E6_30d p tmx_Pax7-019.nd2	609.39	446.88	162.51
22	E6_30d p tmx_Pax7-020.nd2	770.31	300.74	469.57
23	E6_30d p tmx_Pax7-021.nd2	504.17	374.17	130
24	E6_30d p tmx_Pax7-021.nd2	456	300.07	155.93
25	E6_30d p tmx_Pax7-022.nd2	294.84	209.3	85.54
26	E6_30d p tmx_Pax7-023.nd2	918.03	568.49	349.54
27	E6_30d p tmx_Pax7-024.nd2	635.04	354.38	280.66
28	E6_30d p tmx_Pax7-026.nd2	273.72	217.6	56.12
29	E6_30d p tmx_Pax7-027.nd2	795.38	346.51	448.87
30	E6_30d p tmx_Pax7-029.nd2	861	514.17	346.83
31	E6_30d p tmx_Pax7-030.nd2	1301.67	953.74	347.93
32	E6_30d p tmx_Pax7-033.nd2	1899.37	1431	468.37
33	E6_30d p tmx_Pax7-033.nd2	1434.12	1055.46	378.66
34	E6_30d p tmx_Pax7-034.nd2	1112.83	757.56	355.27
35	E6_30d p tmx_Pax7-035.nd2	392.01	343.94	48.07
36	E6_30d p tmx_Pax7-036.nd2	529.91	300.81	229.1
37	E6_30d p tmx_Pax7-036.nd2	420.01	219.53	200.48
38	E6_30d p tmx_Pax7-036.nd2	382.47	210.82	171.65
39	E6_30d p tmx_Pax7-037.nd2	395.01	231.66	163.35
40	E6_30d p tmx_Pax7-038.nd2	279.66	249.11	30.55
41	E6_30d p tmx_Pax7-039.nd2	397.84	237.4	160.44
42	E6_30d p tmx_Pax7-040.nd2	750.81	464.62	286.19
43	E6_30d p tmx_Pax7-043.nd2	1113.87	684.05	429.82
44	E6_30d p tmx_Pax7-044.nd2	604.15	357.91	246.24
45	E6_30d p tmx_Pax7-045.nd2	350.03	252.48	97.55
46	E6_30d p tmx_Pax7-046.nd2	790.36	437.45	352.91
47	E6_30d p tmx_Pax7-046.nd2	758.39	469.68	288.71
48	E6_30d p tmx_Pax7-047.nd2	940.68	521.69	418.99
49	E6_30d p tmx_Pax7-048.nd2	721.17	303.23	417.94
50	E6_30d p tmx_Pax7-049.nd2	523	410.91	112.09
51	E6_30d p tmx_Pax7-050.nd2	1086.12	580.68	505.44
52	E6_30d p tmx_Pax7-051.nd2	1011.97	505.69	506.28
53	E6_30d p tmx_Pax7-053.nd2	957.99	794.56	163.43
54	E6_30d p tmx_Pax7-054.nd2	1039.33	623.01	416.32
55	E6_30d p tmx_Pax7-056.nd2	731.69	561.65	170.04
56	E6_30d p tmx_Pax7-057.nd2	788	481.2	306.8
57	E6_30d p tmx_Pax7-057.nd2	876.98	414.88	462.1
58	E6_30d p tmx_Pax7-059.nd2	630.19	493.57	136.62
59	E6_30d p tmx_Pax7-059.nd2	702.1	448.59	253.51
60	E6_30d p tmx_Pax7-060.nd2	868.45	407.96	460.49

## Sheet: Ctrl6_050216
Item	Source	Pax7 (Cy5) mean intensity	Cy5 channel background	Pax7 mean intensity
1	C6_30d p tmx_Pax7-030.nd2	660.25	359.43	300.82
2	C6_30d p tmx_Pax7-029.nd2	770.55	477.5	293.05
3	C6_30d p tmx_Pax7-028.nd2	619.41	384.84	234.57
4	C6_30d p tmx_Pax7-027.nd2	681.08	293.49	387.59
5	C6_30d p tmx_Pax7-026.nd2	616.43	378.7	237.73
6	C6_30d p tmx_Pax7-025.nd2	1235.47	541.93	693.54
7	C6_30d p tmx_Pax7-025.nd2	997.69	408.51	589.18
8	C6_30d p tmx_Pax7-024.nd2	745.05	401.39	343.66
9	C6_30d p tmx_Pax7-024.nd2	618.32	359.56	258.76
10	C6_30d p tmx_Pax7-024.nd2	512.39	317.54	194.85
11	C6_30d p tmx_Pax7-023.nd2	876.76	480.86	395.9
12	C6_30d p tmx_Pax7-023.nd2	857.96	373.5	484.46
13	C6_30d p tmx_Pax7-023.nd2	749.55	397.78	351.77
14	C6_30d p tmx_Pax7-023.nd2	1123.89	581.94	541.95
15	C6_30d p tmx_Pax7-021.nd2	1147.72	552.48	595.24
16	C6_30d p tmx_Pax7-021.nd2	1409.16	787.11	622.05
17	C6_30d p tmx_Pax7-022.nd2	700.99	512.17	188.82
18	C6_30d p tmx_Pax7-020.nd2	1549.12	695.13	853.99
19	C6_30d p tmx_Pax7-020.nd2	1613.19	537.64	1075.55
20	C6_30d p tmx_Pax7-020.nd2	1014.13	597.46	416.67
21	C6_30d p tmx_Pax7-019.nd2	1028.63	461.22	567.41
22	C6_30d p tmx_Pax7-018.nd2	1051.44	412.57	638.87
23	C6_30d p tmx_Pax7-017.nd2	761.39	487.87	273.52
24	C6_30d p tmx_Pax7-017.nd2	1010.4	445.61	564.79
25	C6_30d p tmx_Pax7-016.nd2	1437.84	652.87	784.97
26	C6_30d p tmx_Pax7-016.nd2	1279.24	821.97	457.27
27	C6_30d p tmx_Pax7-016.nd2	903.82	644.41	259.41
28	C6_30d p tmx_Pax7-015.nd2	1486.77	669.39	817.38
29	C6_30d p tmx_Pax7-014.nd2	1168.88	436.66	732.22
30	C6_30d p tmx_Pax7-014.nd2	497.03	374.94	122.09
31	C6_30d p tmx_Pax7-013.nd2	1201.98	501.17	700.81
32	C6_30d p tmx_Pax7-013.nd2	801.8	480.53	321.27
33	C6_30d p tmx_Pax7-012.nd2	1134.46	319.14	815.32
34	C6_30d p tmx_Pax7-011.nd2	631.9	311.98	319.92
35	C6_30d p tmx_Pax7-011.nd2	636.53	288.61	347.92
36	C6_30d p tmx_Pax7-010.nd2	781.56	319.37	462.19
37	C6_30d p tmx_Pax7-010.nd2	678.11	314.47	363.64
38	C6_30d p tmx_Pax7-009.nd2	1131.95	399.32	732.63
39	C6_30d p tmx_Pax7-009.nd2	989.26	295.4	693.86
40	C6_30d p tmx_Pax7-009.nd2	639.05	324.12	314.93
41	C6_30d p tmx_Pax7-009.nd2	710.48	337.89	372.59
42	C6_30d p tmx_Pax7-008.nd2	1084.71	311.32	773.39
43	C6_30d p tmx_Pax7-007.nd2	996.53	357.1	639.43
44	C6_30d p tmx_Pax7-007.nd2	687.73	317.5	370.23
45	C6_30d p tmx_Pax7-006.nd2	929.05	308.41	620.64
46	C6_30d p tmx_Pax7-006.nd2	740.6	303.23	437.37
47	C6_30d p tmx_Pax7-005.nd2	704.43	336.41	368.02
48	C6_30d p tmx_Pax7-005.nd2	605.1	275.9	329.2
49	C6_30d p tmx_Pax7-004.nd2	678.2	278.36	399.84
50	C6_30d p tmx_Pax7-003.nd2	621.79	309.26	312.53
51	C6_30d p tmx_Pax7-002.nd2	1112.08	362.17	749.91
52	C6_30d p tmx_Pax7-002.nd2	402.66	235.57	167.09
53	C6_30d p tmx_Pax7-001.nd2	811.15	336.47	474.68
54	C6_30d p tmx_Pax7-001.nd2	539.5	350.84	188.66
55	C6_30d p tmx_Pax7-001.nd2	524.21	307.29	216.92
56	C6_30d p tmx_Pax7-001.nd2	1098.15	473.29	624.86
57	C6_30d p tmx_Pax7-063.nd2	1290.17	666.01	624.16
58	C6_30d p tmx_Pax7-063.nd2	1194.19	538.38	655.81
59	C6_30d p tmx_Pax7-063.nd2	1068	571.13	496.87
60	C6_30d p tmx_Pax7-063.nd2	1130.21	511.72	618.49
61	C6_30d p tmx_Pax7-063.nd2	1373.97	737.04	636.93
62	C6_30d p tmx_Pax7-063.nd2	863.12	520.26	342.86
63	C6_30d p tmx_Pax7-062.nd2	1074.94	858.1	216.84
64	C6_30d p tmx_Pax7-062.nd2	927.01	586.13	340.88
65	C6_30d p tmx_Pax7-061.nd2	1718.62	842.72	875.9
66	C6_30d p tmx_Pax7-061.nd2	1014.04	606.63	407.41
67	C6_30d p tmx_Pax7-060.nd2	1465.81	1056.97	408.84
68	C6_30d p tmx_Pax7-060.nd2	1533.75	890.93	642.82
69	C6_30d p tmx_Pax7-060.nd2	906.5	581.35	325.15
70	C6_30d p tmx_Pax7-060.nd2	1263.43	975.39	288.04
71	C6_30d p tmx_Pax7-059.nd2	1316.33	551.93	764.4
72	C6_30d p tmx_Pax7-058.nd2	1702.51	573.28	1129.23
73	C6_30d p tmx_Pax7-057.nd2	1422.17	714.4	707.77
74	C6_30d p tmx_Pax7-056.nd2	1256.48	612.86	643.62
75	C6_30d p tmx_Pax7-055.nd2	1199.42	583.38	616.04
76	C6_30d p tmx_Pax7-055.nd2	990.11	476.42	513.69
77	C6_30d p tmx_Pax7-054.nd2	1516.84	539.71	977.13
78	C6_30d p tmx_Pax7-054.nd2	960.36	445.33	515.03
79	C6_30d p tmx_Pax7-053.nd2	1434.47	498	936.47
80	C6_30d p tmx_Pax7-053.nd2	1075.35	705.66	369.69
81	C6_30d p tmx_Pax7-052.nd2	691.27	437.57	253.7
82	C6_30d p tmx_Pax7-052.nd2	644.84	439.47	205.37
83	C6_30d p tmx_Pax7-051.nd2	604.16	340.8	263.36
84	C6_30d p tmx_Pax7-050.nd2	1089.96	715.97	373.99
85	C6_30d p tmx_Pax7-049.nd2	902.98	500.67	402.31
86	C6_30d p tmx_Pax7-048.nd2	323.11	222.9	100.21
87	C6_30d p tmx_Pax7-047.nd2	358.25	263.27	94.98
88	C6_30d p tmx_Pax7-047.nd2	390.15	230.7	159.45
89	C6_30d p tmx_Pax7-046.nd2	396.65	319.57	77.08
90	C6_30d p tmx_Pax7-045.nd2	684.62	444.66	239.96
91	C6_30d p tmx_Pax7-044.nd2	904.3	603.01	301.29
92	C6_30d p tmx_Pax7-043.nd2	589.34	294.47	294.87
93	C6_30d p tmx_Pax7-042.nd2	1025.49	639.57	385.92
94	C6_30d p tmx_Pax7-041.nd2	936.69	518.15	418.54
95	C6_30d p tmx_Pax7-040.nd2	674.23	394.37	279.86
96	C6_30d p tmx_Pax7-039.nd2	1114.53	684.05	430.48
97	C6_30d p tmx_Pax7-038.nd2	978.7	662.15	316.55
98	C6_30d p tmx_Pax7-037.nd2	434.4	286.91	147.49
99	C6_30d p tmx_Pax7-037.nd2	600.74	272.45	328.29
100	C6_30d p tmx_Pax7-036.nd2	303.44	221.55	81.89
101	C6_30d p tmx_Pax7-036.nd2	413.93	266.7	147.23
102	C6_30d p tmx_Pax7-035.nd2	471.83	256.81	215.02
103	C6_30d p tmx_Pax7-034.nd2	419.94	257.64	162.3
104	C6_30d p tmx_Pax7-033.nd2	571.6	376.72	194.88
105	C6_30d p tmx_Pax7-032.nd2	439.04	284.2	154.84
106	C6_30d p tmx_Pax7-031.nd2	447.48	242.2	205.28

## Sheet: Expt10_050515
Item	Source	Pax7 (Cy5) mean intensity	Cy5 channel background	Pax7 mean intensity
1	E10_30d p tmx_Pax7-030.nd2	794.09	341.07	453.02
2	E10_30d p tmx_Pax7-030.nd2	544.33	230.19	314.14
3	E10_30d p tmx_Pax7-029.nd2	847.42	328.32	519.1
4	E10_30d p tmx_Pax7-028.nd2	697.72	401.07	296.65
5	E10_30d p tmx_Pax7-027.nd2	576.7	305.24	271.46
6	E10_30d p tmx_Pax7-027.nd2	409.83	245.38	164.45
7	E10_30d p tmx_Pax7-026.nd2	665.97	343.31	322.66
8	E10_30d p tmx_Pax7-026.nd2	837.08	361.29	475.79
9	E10_30d p tmx_Pax7-025.nd2	800.87	309.7	491.17
10	E10_30d p tmx_Pax7-025.nd2	574.67	343.64	231.03
11	E10_30d p tmx_Pax7-024.nd2	892.29	552.65	339.64
12	E10_30d p tmx_Pax7-023.nd2	652.02	255.32	396.7
13	E10_30d p tmx_Pax7-023.nd2	498.17	308.32	189.85
14	E10_30d p tmx_Pax7-022.nd2	449.69	421.02	28.67
15	E10_30d p tmx_Pax7-022.nd2	613.46	346.89	266.57
16	E10_30d p tmx_Pax7-021.nd2	307.32	231.66	75.66
17	E10_30d p tmx_Pax7-021.nd2	581.58	193.6	387.98
18	E10_30d p tmx_Pax7-021.nd2	771.97	254.31	517.66
19	E10_30d p tmx_Pax7-021.nd2	773.19	311.02	462.17
20	E10_30d p tmx_Pax7-021.nd2	630.79	248.83	381.96
21	E10_30d p tmx_Pax7-020.nd2	541.54	289.94	251.6
22	E10_30d p tmx_Pax7-020.nd2	458.01	198.66	259.35
23	E10_30d p tmx_Pax7-020.nd2	555.51	209.28	346.23
24	E10_30d p tmx_Pax7-020.nd2	527.09	195.03	332.06
25	E10_30d p tmx_Pax7-020.nd2	385.81	229.98	155.83
26	E10_30d p tmx_Pax7-019.nd2	613.18	409.21	203.97
27	E10_30d p tmx_Pax7-019.nd2	575.83	353.95	221.88
28	E10_30d p tmx_Pax7-018.nd2	649.68	416.33	233.35
29	E10_30d p tmx_Pax7-018.nd2	509.96	307.08	202.88
30	E10_30d p tmx_Pax7-017.nd2	732.3	511.72	220.58
31	E10_30d p tmx_Pax7-017.nd2	710.87	460.04	250.83
32	E10_30d p tmx_Pax7-017.nd2	771.97	360.55	411.42
33	E10_30d p tmx_Pax7-016.nd2	749.59	583.35	166.24
34	E10_30d p tmx_Pax7-015.nd2	727.78	341.88	385.9
35	E10_30d p tmx_Pax7-015.nd2	428.33	357.48	70.85
36	E10_30d p tmx_Pax7-015.nd2	698.34	336.99	361.35
37	E10_30d p tmx_Pax7-015.nd2	715.53	420.73	294.8
38	E10_30d p tmx_Pax7-013.nd2	515.47	283.67	231.8
39	E10_30d p tmx_Pax7-013.nd2	660.86	435.09	225.77
40	E10_30d p tmx_Pax7-013.nd2	413.09	264.03	149.06
41	E10_30d p tmx_Pax7-011.nd2	629.9	261.46	368.44
42	E10_30d p tmx_Pax7-011.nd2	517.74	284.69	233.05
43	E10_30d p tmx_Pax7-011.nd2	579.65	345.13	234.52
44	E10_30d p tmx_Pax7-011.nd2	492.57	305.94	186.63
45	E10_30d p tmx_Pax7-009.nd2	636.26	266.18	370.08
46	E10_30d p tmx_Pax7-008.nd2	774.89	328.74	446.15
47	E10_30d p tmx_Pax7-008.nd2	438.11	272.86	165.25
48	E10_30d p tmx_Pax7-007.nd2	1123.4	723.15	400.25
49	E10_30d p tmx_Pax7-005.nd2	758.86	459.54	299.32
50	E10_30d p tmx_Pax7-004.nd2	705.81	469.97	235.84
51	E10_30d p tmx_Pax7-004.nd2	654.43	408.04	246.39
52	E10_30d p tmx_Pax7-003.nd2	876.36	384.96	491.4
53	E10_30d p tmx_Pax7-002.nd2	662.57	349.25	313.32
54	E10_30d p tmx_Pax7-001.nd2	797.36	343.41	453.95
55	E10_30d p tmx_Pax7-062.nd2	925.48	540.63	384.85
56	E10_30d p tmx_Pax7-061.nd2	818.69	348.33	470.36
57	E10_30d p tmx_Pax7-061.nd2	440.76	250.81	189.95
58	E10_30d p tmx_Pax7-061.nd2	287.14	255.55	31.59
59	E10_30d p tmx_Pax7-061.nd2	380.67	163.04	217.63
60	E10_30d p tmx_Pax7-060.nd2	766.83	382.12	384.71
61	E10_30d p tmx_Pax7-060.nd2	437.05	265.78	171.27
62	E10_30d p tmx_Pax7-059.nd2	1069.51	650.61	418.9
63	E10_30d p tmx_Pax7-058.nd2	526.98	287.94	239.04
64	E10_30d p tmx_Pax7-058.nd2	422.85	266.66	156.19
65	E10_30d p tmx_Pax7-057.nd2	495.25	244.01	251.24
66	E10_30d p tmx_Pax7-057.nd2	425.4	200.84	224.56
67	E10_30d p tmx_Pax7-056.nd2	767.35	382.72	384.63
68	E10_30d p tmx_Pax7-055.nd2	740.7	500.49	240.21
69	E10_30d p tmx_Pax7-054.nd2	397.23	225.67	171.56
70	E10_30d p tmx_Pax7-054.nd2	736.6	192.17	544.43
71	E10_30d p tmx_Pax7-053.nd2	496.95	256.29	240.66
72	E10_30d p tmx_Pax7-053.nd2	558.83	337.86	220.97
73	E10_30d p tmx_Pax7-053.nd2	573.61	251.76	321.85
74	E10_30d p tmx_Pax7-053.nd2	526.9	259.62	267.28
75	E10_30d p tmx_Pax7-052.nd2	503.73	262.79	240.94
76	E10_30d p tmx_Pax7-052.nd2	633.69	321.68	312.01
77	E10_30d p tmx_Pax7-051.nd2	768.97	390.54	378.43
78	E10_30d p tmx_Pax7-051.nd2	356.75	222.39	134.36
79	E10_30d p tmx_Pax7-050.nd2	797.28	456.74	340.54
80	E10_30d p tmx_Pax7-049.nd2	622.98	486.73	136.25
81	E10_30d p tmx_Pax7-048.nd2	727.1	393.68	333.42
82	E10_30d p tmx_Pax7-047.nd2	884.27	367.64	516.63
83	E10_30d p tmx_Pax7-047.nd2	405.78	230.05	175.73
84	E10_30d p tmx_Pax7-046.nd2	668.7	331.85	336.85
85	E10_30d p tmx_Pax7-045.nd2	802.12	569.24	232.88
86	E10_30d p tmx_Pax7-045.nd2	788.35	470.97	317.38
87	E10_30d p tmx_Pax7-045.nd2	979.59	565.97	413.62
88	E10_30d p tmx_Pax7-043.nd2	562.45	240.42	322.03
89	E10_30d p tmx_Pax7-043.nd2	565.26	242.26	323
90	E10_30d p tmx_Pax7-041.nd2	816.3	287.16	529.14
91	E10_30d p tmx_Pax7-041.nd2	513.63	244.53	269.1
92	E10_30d p tmx_Pax7-040.nd2	498.58	245.78	252.8
93	E10_30d p tmx_Pax7-039.nd2	647.8	316.56	331.24
94	E10_30d p tmx_Pax7-038.nd2	499.06	319.45	179.61
95	E10_30d p tmx_Pax7-037.nd2	865.64	492.19	373.45
96	E10_30d p tmx_Pax7-036.nd2	521.85	291.41	230.44
97	E10_30d p tmx_Pax7-035.nd2	609.46	329.08	280.38
98	E10_30d p tmx_Pax7-034.nd2	469.5	326.82	142.68
99	E10_30d p tmx_Pax7-033.nd2	547.85	234.52	313.33
100	E10_30d p tmx_Pax7-033.nd2	722.2	378.65	343.55
101	E10_30d p tmx_Pax7-032.nd2	531.52	242.17	289.35
102	E10_30d p tmx_Pax7-031.nd2	565.47	255.02	310.45

## Sheet: Ctrl5_031020
Item	Source	Pax7 (Cy5) mean intensity	Cy5 channel background	Pax7 mean intensity
1	C5_30d p tmx_Pax7-030.nd2	540.8	352.46	188.34
2	C5_30d p tmx_Pax7-030.nd2	812.62	348.25	464.37
3	C5_30d p tmx_Pax7-029.nd2	796.93	465.91	331.02
4	C5_30d p tmx_Pax7-029.nd2	820.68	360.16	460.52
5	C5_30d p tmx_Pax7-028.nd2	928.04	476.09	451.95
6	C5_30d p tmx_Pax7-028.nd2	1000.39	415.7	584.69
7	C5_30d p tmx_Pax7-028.nd2	1059.97	830.26	229.71
8	C5_30d p tmx_Pax7-026.nd2	1095.51	441.29	654.22
9	C5_30d p tmx_Pax7-023.nd2	851.51	580.56	270.95
10	C5_30d p tmx_Pax7-023.nd2	644.92	423.8	221.12
11	C5_30d p tmx_Pax7-023.nd2	616.85	388.11	228.74
12	C5_30d p tmx_Pax7-021.nd2	837.59	519.29	318.3
13	C5_30d p tmx_Pax7-020.nd2	1124.31	525.55	598.76
14	C5_30d p tmx_Pax7-020.nd2	1310.39	681.03	629.36
15	C5_30d p tmx_Pax7-019.nd2	1069.19	708.28	360.91
16	C5_30d p tmx_Pax7-018.nd2	547.54	393.47	154.07
17	C5_30d p tmx_Pax7-017.nd2	715.65	363.08	352.57
18	C5_30d p tmx_Pax7-017.nd2	669.88	441.37	228.51
19	C5_30d p tmx_Pax7-016.nd2	1109.53	479.26	630.27
20	C5_30d p tmx_Pax7-016.nd2	377.97	246.82	131.15
21	C5_30d p tmx_Pax7-016.nd2	434.92	284.54	150.38
22	C5_30d p tmx_Pax7-015.nd2	492.99	283.38	209.61
23	C5_30d p tmx_Pax7-015.nd2	629.75	291.65	338.1
24	C5_30d p tmx_Pax7-014.nd2	653.73	410.54	243.19
25	C5_30d p tmx_Pax7-014.nd2	657.18	329.82	327.36
26	C5_30d p tmx_Pax7-013.nd2	779.37	391.36	388.01
27	C5_30d p tmx_Pax7-008.nd2	846.64	504.54	342.1
28	C5_30d p tmx_Pax7-007.nd2	831.09	543.54	287.55
29	C5_30d p tmx_Pax7-007.nd2	774.75	436.84	337.91
30	C5_30d p tmx_Pax7-006.nd2	1006.47	550.94	455.53
31	C5_30d p tmx_Pax7-006.nd2	563.08	427.98	135.1
32	C5_30d p tmx_Pax7-005.nd2	730.26	549.51	180.75
33	C5_30d p tmx_Pax7-004.nd2	708.42	417.03	291.39
34	C5_30d p tmx_Pax7-004.nd2	586.52	426.37	160.15
35	C5_30d p tmx_Pax7-004.nd2	765.5	501.26	264.24
36	C5_30d p tmx_Pax7-003.nd2	795.47	486.78	308.69
37	C5_30d p tmx_Pax7-003.nd2	790.89	435.67	355.22
38	C5_30d p tmx_Pax7-003.nd2	670.43	449.87	220.56
39	C5_30d p tmx_Pax7-003.nd2	656.64	449.44	207.2
40	C5_30d p tmx_Pax7-003.nd2	612.82	451.29	161.53
41	C5_30d p tmx_Pax7-002.nd2	730.41	433.06	297.35
42	C5_30d p tmx_Pax7-002.nd2	640.36	356.81	283.55
43	C5_30d p tmx_Pax7-002.nd2	550.78	348.11	202.67
44	C5_30d p tmx_Pax7-001.nd2	444.26	323.41	120.85
45	C5_30d p tmx_Pax7-071.nd2	1148.07	682.71	465.36
46	C5_30d p tmx_Pax7-070.nd2	1081.03	677.75	403.28
47	C5_30d p tmx_Pax7-068.nd2	599.18	386.73	212.45
48	C5_30d p tmx_Pax7-063.nd2	1070.51	421.35	649.16
49	C5_30d p tmx_Pax7-062.nd2	1179.1	757.66	421.44
50	C5_30d p tmx_Pax7-062.nd2	998.15	678.81	319.34
51	C5_30d p tmx_Pax7-061.nd2	1234.38	829.05	405.33
52	C5_30d p tmx_Pax7-058.nd2	1219.63	422	797.63
53	C5_30d p tmx_Pax7-058.nd2	526.83	405.42	121.41
54	C5_30d p tmx_Pax7-058.nd2	690.14	420.41	269.73
55	C5_30d p tmx_Pax7-056.nd2	828.74	398.78	429.96
56	C5_30d p tmx_Pax7-055.nd2	959.03	545.02	414.01
57	C5_30d p tmx_Pax7-054.nd2	1291.29	747.77	543.52
58	C5_30d p tmx_Pax7-054.nd2	1021.8	711.69	310.11
59	C5_30d p tmx_Pax7-054.nd2	1413.87	878.49	535.38
60	C5_30d p tmx_Pax7-053.nd2	880.14	562.15	317.99
61	C5_30d p tmx_Pax7-050.nd2	946.11	622.68	323.43
62	C5_30d p tmx_Pax7-050.nd2	828.53	574.94	253.59
63	C5_30d p tmx_Pax7-048.nd2	680.83	398.35	282.48
64	C5_30d p tmx_Pax7-048.nd2	551.22	424.9	126.32
65	C5_30d p tmx_Pax7-048.nd2	683.87	455.09	228.78
66	C5_30d p tmx_Pax7-047.nd2	563.12	397.66	165.46
67	C5_30d p tmx_Pax7-047.nd2	496.58	377.98	118.6
68	C5_30d p tmx_Pax7-047.nd2	726.98	344.23	382.75
69	C5_30d p tmx_Pax7-046.nd2	751.65	418.01	333.64
70	C5_30d p tmx_Pax7-046.nd2	1035.19	472.76	562.43
71	C5_30d p tmx_Pax7-045.nd2	1143.86	422.31	721.55
72	C5_30d p tmx_Pax7-045.nd2	633.34	413.08	220.26
73	C5_30d p tmx_Pax7-045.nd2	831.53	442.37	389.16
74	C5_30d p tmx_Pax7-044.nd2	983.32	471.08	512.24
75	C5_30d p tmx_Pax7-044.nd2	786.41	498.47	287.94
76	C5_30d p tmx_Pax7-044.nd2	1009.43	624.39	385.04
77	C5_30d p tmx_Pax7-042.nd2	677.54	415.79	261.75
78	C5_30d p tmx_Pax7-041.nd2	1150.75	466.54	684.21
79	C5_30d p tmx_Pax7-041.nd2	943.75	534.1	409.65
80	C5_30d p tmx_Pax7-041.nd2	685.65	358.45	327.2
81	C5_30d p tmx_Pax7-040.nd2	1142.83	494.93	647.9
82	C5_30d p tmx_Pax7-039.nd2	1123.82	567.45	556.37
83	C5_30d p tmx_Pax7-039.nd2	1080.69	462.55	618.14
84	C5_30d p tmx_Pax7-039.nd2	802.76	387.71	415.05
85	C5_30d p tmx_Pax7-038.nd2	706.88	429.91	276.97
86	C5_30d p tmx_Pax7-038.nd2	924.79	485.07	439.72
87	C5_30d p tmx_Pax7-038.nd2	726.6	431.18	295.42
88	C5_30d p tmx_Pax7-037.nd2	887.06	436.66	450.4
89	C5_30d p tmx_Pax7-036.nd2	919.71	445.83	473.88
90	C5_30d p tmx_Pax7-035.nd2	1033.01	424.28	608.73
91	C5_30d p tmx_Pax7-035.nd2	1232.21	609.26	622.95
92	C5_30d p tmx_Pax7-035.nd2	947.89	508.75	439.14
93	C5_30d p tmx_Pax7-034.nd2	957.21	446.12	511.09
94	C5_30d p tmx_Pax7-032.nd2	774.44	376.29	398.15
95	C5_30d p tmx_Pax7-032.nd2	913.74	399.82	513.92

## Sheet: Expt3_031020
Item	Source	Pax7 (Cy5) mean intensity	Cy5 channel background	Pax7 mean intensity
1	E3_30d p tmx_Pax7-030.nd2	871.58	449.31	422.27
2	E3_30d p tmx_Pax7-029.nd2	633.83	274.38	359.45
3	E3_30d p tmx_Pax7-028.nd2	545.57	274.89	270.68
4	E3_30d p tmx_Pax7-026.nd2	972.45	697.64	274.81
5	E3_30d p tmx_Pax7-024.nd2	1003.74	817.38	186.36
6	E3_30d p tmx_Pax7-023.nd2	603.35	289.06	314.29
7	E3_30d p tmx_Pax7-022.nd2	576.84	238.44	338.4
8	E3_30d p tmx_Pax7-022.nd2	642.49	253.87	388.62
9	E3_30d p tmx_Pax7-020.nd2	528.6	306.32	222.28
10	E3_30d p tmx_Pax7-020.nd2	395.27	277.81	117.46
11	E3_30d p tmx_Pax7-019.nd2	726.18	250.74	475.44
12	E3_30d p tmx_Pax7-018.nd2	503.89	279.91	223.98
13	E3_30d p tmx_Pax7-016.nd2	1254.56	862.54	392.02
14	E3_30d p tmx_Pax7-011.nd2	710.6	467.75	242.85
15	E3_30d p tmx_Pax7-010.nd2	603.81	370.6	233.21
16	E3_30d p tmx_Pax7-010.nd2	494.68	349.22	145.46
17	E3_30d p tmx_Pax7-009.nd2	666.85	254.19	412.66
18	E3_30d p tmx_Pax7-009.nd2	871.8	342.86	528.94
19	E3_30d p tmx_Pax7-009.nd2	338.4	260.71	77.69
20	E3_30d p tmx_Pax7-007.nd2	680.56	316.17	364.39
21	E3_30d p tmx_Pax7-007.nd2	434.72	301.89	132.83
22	E3_30d p tmx_Pax7-007.nd2	274.69	216.79	57.9
23	E3_30d p tmx_Pax7-007.nd2	572.42	278.82	293.6
24	E3_30d p tmx_Pax7-006.nd2	391.41	210.42	180.99
25	E3_30d p tmx_Pax7-006.nd2	380.64	226.23	154.41
26	E3_30d p tmx_Pax7-005.nd2	519.97	315.9	204.07
27	E3_30d p tmx_Pax7-005.nd2	783.41	425.53	357.88
28	E3_30d p tmx_Pax7-004.nd2	884.95	591.24	293.71
29	E3_30d p tmx_Pax7-003.nd2	472.12	265.82	206.3
30	E3_30d p tmx_Pax7-003.nd2	613.88	261.8	352.08
31	E3_30d p tmx_Pax7-003.nd2	500.76	322.26	178.5
32	E3_30d p tmx_Pax7-003.nd2	348.57	259.24	89.33
33	E3_30d p tmx_Pax7-002.nd2	472.72	303.43	169.29
34	E3_30d p tmx_Pax7-002.nd2	380.46	296.38	84.08
35	E3_30d p tmx_Pax7-002.nd2	711.1	336.58	374.52
36	E3_30d p tmx_Pax7-001.nd2	513.23	231.25	281.98
37	E3_30d p tmx_Pax7-001.nd2	515.18	256.46	258.72
38	E3_30d p tmx_Pax7-001.nd2	441.91	237.37	204.54
39	E3_30d p tmx_Pax7-061.nd2	422.38	293.44	128.94
40	E3_30d p tmx_Pax7-060.nd2	705.75	384.33	321.42
41	E3_30d p tmx_Pax7-060.nd2	439.1	301.87	137.23
42	E3_30d p tmx_Pax7-057.nd2	626.25	383.98	242.27
43	E3_30d p tmx_Pax7-056.nd2	627.16	337.88	289.28
44	E3_30d p tmx_Pax7-055.nd2	396.92	277.46	119.46
45	E3_30d p tmx_Pax7-054.nd2	424.55	342.46	82.09
46	E3_30d p tmx_Pax7-051.nd2	634.5	441.56	192.94
47	E3_30d p tmx_Pax7-050.nd2	753.93	404.89	349.04
48	E3_30d p tmx_Pax7-049.nd2	997.38	696.4	300.98
49	E3_30d p tmx_Pax7-048.nd2	773.78	446.21	327.57
50	E3_30d p tmx_Pax7-048.nd2	1341.79	850.64	491.15
51	E3_30d p tmx_Pax7-048.nd2	567.71	399.34	168.37
52	E3_30d p tmx_Pax7-047.nd2	698.24	535.81	162.43
53	E3_30d p tmx_Pax7-046.nd2	646.76	438.87	207.89
54	E3_30d p tmx_Pax7-044.nd2	487.41	418.12	69.29
55	E3_30d p tmx_Pax7-043.nd2	586.45	462.03	124.42
56	E3_30d p tmx_Pax7-043.nd2	787.41	486.23	301.18
57	E3_30d p tmx_Pax7-043.nd2	1048.75	741.07	307.68
58	E3_30d p tmx_Pax7-043.nd2	833.96	512.4	321.56
59	E3_30d p tmx_Pax7-042.nd2	717.65	494.89	222.76
60	E3_30d p tmx_Pax7-042.nd2	1070.47	765.17	305.3
61	E3_30d p tmx_Pax7-041.nd2	801.47	473.06	328.41
62	E3_30d p tmx_Pax7-041.nd2	557.81	458.42	99.39
63	E3_30d p tmx_Pax7-041.nd2	577.15	406.92	170.23
64	E3_30d p tmx_Pax7-038.nd2	782.09	527.38	254.71
65	E3_30d p tmx_Pax7-038.nd2	894.33	653.68	240.65
66	E3_30d p tmx_Pax7-036.nd2	433.11	348.44	84.67
67	E3_30d p tmx_Pax7-034.nd2	623.11	545.15	77.96
68	E3_30d p tmx_Pax7-033.nd2	451.35	393.07	58.28
69	E3_30d p tmx_Pax7-032.nd2	790.16	675.99	114.17
