# Supplementary material for: Heterogeneous levels of delta-like 4 within a multinucleated niche cell maintains muscle stem cell diversity
Source: eLife. 2022 Dec 30;11:e68180. doi: 10.7554/eLife.68180 (PMC9803355; doi:10.7554/eLife.68180)
Supplement: Figure 3—source data 4. [file elife-68180-fig3-data4.xlsx]

## Sheet: Ctrl8_050515
Item	Source	ddx6 (GFP) Mean Intensity	GFP background	ddx6 intensity- background intensity	Corrected minus to zeros
1	C8_30d P TMX_Pax7+DDX6 035.nd2	2139.11	1879.22	259.89	259.89		StDev	167.842
2	C8_30d P TMX_Pax7+DDX6 034.nd2	1754.69	1414.64	340.05	340.05		Variance	28171
3	C8_30d P TMX_Pax7+DDX6 033.nd2	1341.38	1135.54	205.84	205.84
4	C8_30d P TMX_Pax7+DDX6 032.nd2	1396.18	1083.36	312.82	312.82
5	C8_30d P TMX_Pax7+DDX6 031.nd2	1095.21	1057.6	37.61	37.61
6	C8_30d P TMX_Pax7+DDX6 030.nd2	1443.44	1211.4	232.04	232.04
7	C8_30d P TMX_Pax7+DDX6 029.nd2	1956.8	2188.11	-231.31	0
8	C8_30d P TMX_Pax7+DDX6 028.nd2	2448.89	2516.05	-67.16	0
9	C8_30d P TMX_Pax7+DDX6 027.nd2	2929.12	2568.09	361.03	361.03
10	C8_30d P TMX_Pax7+DDX6 026.nd2	1950.44	2738.88	-788.44	0
11	C8_30d P TMX_Pax7+DDX6 025.nd2	2418.11	2655.66	-237.55	0
12	C8_30d P TMX_Pax7+DDX6 025.nd2	2193.44	2080.64	112.8	112.8
13	C8_30d P TMX_Pax7+DDX6 025.nd2	2887.73	2704.69	183.04	183.04
14	C8_30d P TMX_Pax7+DDX6 024.nd2	1410.4	1483.83	-73.43	0
15	C8_30d P TMX_Pax7+DDX6 023.nd2	1711.02	2281.11	-570.09	0
16	C8_30d P TMX_Pax7+DDX6 022.nd2	1600.38	1796.42	-196.04	0
17	C8_30d P TMX_Pax7+DDX6 021.nd2	1881.9	1748.04	133.86	133.86
18	C8_30d P TMX_Pax7+DDX6 020.nd2	1363.54	1093.03	270.51	270.51
19	C8_30d P TMX_Pax7+DDX6 019.nd2	1118.97	1082.11	36.86	36.86
20	C8_30d P TMX_Pax7+DDX6 018.nd2	1170.87	917.39	253.48	253.48
21	C8_30d P TMX_Pax7+DDX6 018.nd2	989.61	862.47	127.14	127.14
22	C8_30d P TMX_Pax7+DDX6 017.nd2	1168.56	953.61	214.95	214.95
23	C8_30d P TMX_Pax7+DDX6 016.nd2	1554.48	1445.42	109.06	109.06
24	C8_30d P TMX_Pax7+DDX6 015.nd2	2288.77	1882.23	406.54	406.54
25	C8_30d P TMX_Pax7+DDX6 014.nd2	1666.96	1504.68	162.28	162.28
26	C8_30d P TMX_Pax7+DDX6 013.nd2	2941.22	2583.6	357.62	357.62
27	C8_30d P TMX_Pax7+DDX6 012.nd2	3098.88	2822.27	276.61	276.61
28	C8_30d P TMX_Pax7+DDX6 011.nd2	2917.73	2602	315.73	315.73
29	C8_30d P TMX_Pax7+DDX6 010.nd2	2050.22	2535.24	-485.02	0
30	C8_30d P TMX_Pax7+DDX6 009.nd2	2032.51	2384.19	-351.68	0
31	C8_30d P TMX_Pax7+DDX6 009.nd2	2583.35	2117.92	465.43	465.43
32	C8_30d P TMX_Pax7+DDX6 008.nd2	2480.57	2706.11	-225.54	0
33	C8_30d P TMX_Pax7+DDX6 007.nd2	2323.71	2834.34	-510.63	0
34	C8_30d P TMX_Pax7+DDX6 006.nd2	2131.14	2401.91	-270.77	0
35	C8_30d P TMX_Pax7+DDX6 004.nd2	1545.06	1324.67	220.39	220.39
36	C8_30d P TMX_Pax7+DDX6 002.nd2	1782.18	1408.51	373.67	373.67
37	C8_30d P TMX_Pax7+DDX6 001.nd2	1384.29	961.72	422.57	422.57
38	C8_30d P TMX_Pax7+DDX6 070.nd2	1945.11	1472.34	472.77	472.77
39	C8_30d P TMX_Pax7+DDX6 069.nd2	1869.28	1653.32	215.96	215.96
40	C8_30d P TMX_Pax7+DDX6 068.nd2	1730.1	1248.51	481.59	481.59
41	C8_30d P TMX_Pax7+DDX6 068.nd2	1383.95	1184.51	199.44	199.44
42	C8_30d P TMX_Pax7+DDX6 068.nd2	1295.5	1159.96	135.54	135.54
43	C8_30d P TMX_Pax7+DDX6 066.nd2	1284.1	1221.41	62.69	62.69
44	C8_30d P TMX_Pax7+DDX6 066.nd2	1433.02	1181.06	251.96	251.96
45	C8_30d P TMX_Pax7+DDX6 065.nd2	2617.84	2562.19	55.65	55.65
46	C8_30d P TMX_Pax7+DDX6 064.nd2	2874.57	2200.36	674.21	674.21
47	C8_30d P TMX_Pax7+DDX6 063.nd2	1787.8	1999.76	-211.96	0
48	C8_30d P TMX_Pax7+DDX6 063.nd2	2527.2	2642.61	-115.41	0
49	C8_30d P TMX_Pax7+DDX6 062.nd2	2322.67	1986.95	335.72	335.72
50	C8_30d P TMX_Pax7+DDX6 061.nd2	2863.79	2414.96	448.83	448.83
51	C8_30d P TMX_Pax7+DDX6 059.nd2	3452.84	3169.81	283.03	283.03
52	C8_30d P TMX_Pax7+DDX6 058.nd2	2699.61	2458.94	240.67	240.67
53	C8_30d P TMX_Pax7+DDX6 057.nd2	1982.68	1849.99	132.69	132.69
54	C8_30d P TMX_Pax7+DDX6 056.nd2	1319.17	1166.55	152.62	152.62
55	C8_30d P TMX_Pax7+DDX6 055.nd2	862.06	820.91	41.15	41.15
56	C8_30d P TMX_Pax7+DDX6 054.nd2	1284	1027.88	256.12	256.12
57	C8_30d P TMX_Pax7+DDX6 053.nd2	1343.86	910.09	433.77	433.77
58	C8_30d P TMX_Pax7+DDX6 052.nd2	1352.27	1122.02	230.25	230.25
59	C8_30d P TMX_Pax7+DDX6 051.nd2	1177.84	941.2	236.64	236.64
60	C8_30d P TMX_Pax7+DDX6 050.nd2	2040.63	1347.67	692.96	692.96
61	C8_30d P TMX_Pax7+DDX6 049.nd2	1533.52	1373.07	160.45	160.45
62	C8_30d P TMX_Pax7+DDX6 048.nd2	2196.78	2110.62	86.16	86.16
63	C8_30d P TMX_Pax7+DDX6 047.nd2	2051.31	1633.26	418.05	418.05
64	C8_30d P TMX_Pax7+DDX6 046.nd2	1588.62	1333.38	255.24	255.24
65	C8_30d P TMX_Pax7+DDX6 045.nd2	2033.34	1567.82	465.52	465.52
66	C8_30d P TMX_Pax7+DDX6 044.nd2	1997.55	1805.44	192.11	192.11
67	C8_30d P TMX_Pax7+DDX6 043.nd2	1657.53	1166.7	490.83	490.83
68	C8_30d P TMX_Pax7+DDX6 042.nd2	1259.67	923.5	336.17	336.17
69	C8_30d P TMX_Pax7+DDX6 042.nd2	1046.43	838	208.43	208.43
70	C8_30d P TMX_Pax7+DDX6 041.nd2	1142.37	812.94	329.43	329.43
71	C8_30d P TMX_Pax7+DDX6 040.nd2	1470.93	1160.75	310.18	310.18
72	C8_30d P TMX_Pax7+DDX6 039.nd2	1569.2	1365.01	204.19	204.19
73	C8_30d P TMX_Pax7+DDX6 038.nd2	1040.59	757.24	283.35	283.35
74	C8_30d P TMX_Pax7+DDX6 037.nd2	1186.33	1154.84	31.49	31.49
75	C8_30d P TMX_Pax7+DDX6 036.nd2	2037.48	1766.05	271.43	271.43

## Sheet: Expt6_050715
Item	Source	ddx6 (GFP) Mean Intensity	GFP background	ddx6 intensity- background intensity	Corrected minus to zeros
1	E6_30d P TMX_Pax7+DDX6 040.nd2	1888.81	1896.64	-7.83	0		StDev	96.1771
2	E6_30d P TMX_Pax7+DDX6 039.nd2	1715.44	1586.74	128.7	128.7		Variance	9250.04
3	E6_30d P TMX_Pax7+DDX6 038.nd2	1217.83	1225.45	-7.62	0
4	E6_30d P TMX_Pax7+DDX6 038.nd2	1249.83	1373.79	-123.96	0
5	E6_30d P TMX_Pax7+DDX6 037.nd2	2060.01	1796.7	263.31	263.31
6	E6_30d P TMX_Pax7+DDX6 036.nd2	1250.25	1175.75	74.5	74.5
7	E6_30d P TMX_Pax7+DDX6 036.nd2	1117.74	1084.83	32.91	32.91
8	E6_30d P TMX_Pax7+DDX6 035.nd2	1458.82	1560.04	-101.22	0
9	E6_30d P TMX_Pax7+DDX6 034.nd2	1042.13	960.28	81.85	81.85
10	E6_30d P TMX_Pax7+DDX6 033.nd2	1628.57	1700.7	-72.13	0
11	E6_30d P TMX_Pax7+DDX6 033.nd2	2093.44	2003.73	89.71	89.71
12	E6_30d P TMX_Pax7+DDX6 031.nd2	1070.74	1395.53	-324.79	0
13	E6_30d P TMX_Pax7+DDX6 030.nd2	1783.39	1652.7	130.69	130.69
14	E6_30d P TMX_Pax7+DDX6 029.nd2	2360.9	2065.23	295.67	295.67
15	E6_30d P TMX_Pax7+DDX6 028.nd2	1813.45	2101.23	-287.78	0
16	E6_30d P TMX_Pax7+DDX6 027.nd2	2408.52	2308.07	100.45	100.45
17	E6_30d P TMX_Pax7+DDX6 026.nd2	2212.17	2057.75	154.42	154.42
18	E6_30d P TMX_Pax7+DDX6 025.nd2	2135.52	2022.44	113.08	113.08
19	E6_30d P TMX_Pax7+DDX6 024.nd2	1696.09	1438.51	257.58	257.58
20	E6_30d P TMX_Pax7+DDX6 023.nd2	1381.87	1081.22	300.65	300.65
21	E6_30d P TMX_Pax7+DDX6 022.nd2	2285.86	2763.9	-478.04	0
22	E6_30d P TMX_Pax7+DDX6 021.nd2	1595.28	1525.09	70.19	70.19
23	E6_30d P TMX_Pax7+DDX6 020.nd2	1425.11	1404.14	20.97	20.97
24	E6_30d P TMX_Pax7+DDX6 019.nd2	1454.42	1600.86	-146.44	0
25	E6_30d P TMX_Pax7+DDX6 018.nd2	2180.65	2126.22	54.43	54.43
26	E6_30d P TMX_Pax7+DDX6 017.nd2	1974.99	1932.32	42.67	42.67
27	E6_30d P TMX_Pax7+DDX6 017.nd2	1922.53	1882.21	40.32	40.32
28	E6_30d P TMX_Pax7+DDX6 016.nd2	2071.13	1878.03	193.1	193.1
29	E6_30d P TMX_Pax7+DDX6 015.nd2	1876.54	1951.07	-74.53	0
30	E6_30d P TMX_Pax7+DDX6 014.nd2	1991.36	1673.62	317.74	317.74
31	E6_30d P TMX_Pax7+DDX6 013.nd2	1438.88	1336.46	102.42	102.42
32	E6_30d P TMX_Pax7+DDX6 012.nd2	1656.42	1531.97	124.45	124.45
33	E6_30d P TMX_Pax7+DDX6 011.nd2	1980.84	1581.89	398.95	398.95
34	E6_30d P TMX_Pax7+DDX6 010.nd2	2312.9	2319.69	-6.79	0
35	E6_30d P TMX_Pax7+DDX6 008.nd2	1670.5	1483.16	187.34	187.34
36	E6_30d P TMX_Pax7+DDX6 007.nd2	1090.87	925.81	165.06	165.06
37	E6_30d P TMX_Pax7+DDX6 006.nd2	1138.09	1092.21	45.88	45.88
38	E6_30d P TMX_Pax7+DDX6 005.nd2	1636.75	1485.14	151.61	151.61
39	E6_30d P TMX_Pax7+DDX6 004.nd2	1588.99	1411.22	177.77	177.77
40	E6_30d P TMX_Pax7+DDX6 003.nd2	1262.12	1080.97	181.15	181.15
41	E6_30d P TMX_Pax7+DDX6 002.nd2	1393.81	1410.34	-16.53	0
42	E6_30d P TMX_Pax7+DDX6 002.nd2	1342.77	1249.82	92.95	92.95
43	E6_30d P TMX_Pax7+DDX6 002.nd2	1543.35	1713.93	-170.58	0
44	E6_30d P TMX_Pax7+DDX6 002.nd2	1561.29	1369.37	191.92	191.92
45	E6_30d P TMX_Pax7+DDX6 083.nd2	1453.9	1268.75	185.15	185.15
46	E6_30d P TMX_Pax7+DDX6 082.nd2	1583.49	1612.37	-28.88	0
47	E6_30d P TMX_Pax7+DDX6 081.nd2	1702.15	1815.69	-113.54	0
48	E6_30d P TMX_Pax7+DDX6 080.nd2	1892.82	2331.97	-439.15	0
49	E6_30d P TMX_Pax7+DDX6 079.nd2	1391.9	1223.39	168.51	168.51
50	E6_30d P TMX_Pax7+DDX6 078.nd2	2187.49	2141.51	45.98	45.98
51	E6_30d P TMX_Pax7+DDX6 078.nd2	2346.23	2652.91	-306.68	0
52	E6_30d P TMX_Pax7+DDX6 076.nd2	2009.43	2214.68	-205.25	0
53	E6_30d P TMX_Pax7+DDX6 075.nd2	2161.8	2406.44	-244.64	0
54	E6_30d P TMX_Pax7+DDX6 074.nd2	1466.61	1148.36	318.25	318.25
55	E6_30d P TMX_Pax7+DDX6 070.nd2	2277.72	2683.45	-405.73	0
56	E6_30d P TMX_Pax7+DDX6 069.nd2	2325.65	2423.54	-97.89	0
57	E6_30d P TMX_Pax7+DDX6 068.nd2	2113.19	2619.1	-505.91	0
58	E6_30d P TMX_Pax7+DDX6 067.nd2	1947.64	1879.14	68.5	68.5
59	E6_30d P TMX_Pax7+DDX6 066.nd2	1031.84	1076.49	-44.65	0
60	E6_30d P TMX_Pax7+DDX6 065.nd2	2430.97	2272.66	158.31	158.31
61	E6_30d P TMX_Pax7+DDX6 064.nd2	2581.67	2525.04	56.63	56.63
62	E6_30d P TMX_Pax7+DDX6 064.nd2	1576.62	1712.95	-136.33	0
63	E6_30d P TMX_Pax7+DDX6 063.nd2	2638.45	2458.39	180.06	180.06
64	E6_30d P TMX_Pax7+DDX6 062.nd2	1881.38	1711.02	170.36	170.36
65	E6_30d P TMX_Pax7+DDX6 061.nd2	2672.32	3237.24	-564.92	0
66	E6_30d P TMX_Pax7+DDX6 060.nd2	1519.04	1609.25	-90.21	0
67	E6_30d P TMX_Pax7+DDX6 059.nd2	1940.9	3247.68	-1306.78	0
68	E6_30d P TMX_Pax7+DDX6 058.nd2	2003.5	1885.42	118.08	118.08
69	E6_30d P TMX_Pax7+DDX6 057.nd2	2074.75	1909.8	164.95	164.95
70	E6_30d P TMX_Pax7+DDX6 056.nd2	1652.53	1789.07	-136.54	0
71	E6_30d P TMX_Pax7+DDX6 054.nd2	2404.45	2131.53	272.92	272.92
72	E6_30d P TMX_Pax7+DDX6 053.nd2	1828.44	1736.61	91.83	91.83
73	E6_30d P TMX_Pax7+DDX6 052.nd2	1330.89	1328.35	2.54	2.54
74	E6_30d P TMX_Pax7+DDX6 051.nd2	2740.81	3196.66	-455.85	0
75	E6_30d P TMX_Pax7+DDX6 050.nd2	1290.27	1608.17	-317.9	0
76	E6_30d P TMX_Pax7+DDX6 049.nd2	1681.92	1588.88	93.04	93.04
77	E6_30d P TMX_Pax7+DDX6 049.nd2	1542.27	1799.27	-257	0
78	E6_30d P TMX_Pax7+DDX6 048.nd2	1887.12	2025.95	-138.83	0
79	E6_30d P TMX_Pax7+DDX6 047.nd2	3075.62	3149.31	-73.69	0
80	E6_30d P TMX_Pax7+DDX6 046.nd2	948.94	877.78	71.16	71.16
81	E6_30d P TMX_Pax7+DDX6 045.nd2	1200.86	1032.25	168.61	168.61
82	E6_30d P TMX_Pax7+DDX6 045.nd2	1062.95	950.84	112.11	112.11
83	E6_30d P TMX_Pax7+DDX6 044.nd2	1152.75	1097.13	55.62	55.62
84	E6_30d P TMX_Pax7+DDX6 044.nd2	1066.4	1008.8	57.6	57.6
85	E6_30d P TMX_Pax7+DDX6 043.nd2	1045.9	947.9	98	98
86	E6_30d P TMX_Pax7+DDX6 041.nd2	1806.42	1727.02	79.4	79.4

## Sheet: Ctrl6_050216
Item	Source	ddx6 (GFP) Mean Intensity	GFP background	ddx6 intensity- background intensity	Corrected minus to zeros
1	C6_30d p tmx_ddx6_040.nd2	2706.6	2474.58	232.02	232.02		StDev	184.634
2	C6_30d p tmx_ddx6_039.nd2	2437.35	2227.81	209.54	209.54		Variance	34089.9
3	C6_30d p tmx_ddx6_038.nd2	2133.6	2159.43	-25.83	0
4	C6_30d p tmx_ddx6_037.nd2	2402.86	2553.42	-150.56	0
5	C6_30d p tmx_ddx6_036.nd2	1916.15	1761.76	154.39	154.39
6	C6_30d p tmx_ddx6_035.nd2	1846.29	1777.5	68.79	68.79
7	C6_30d p tmx_ddx6_035.nd2	1889.21	2032.15	-142.94	0
8	C6_30d p tmx_ddx6_034.nd2	2128.09	1505.56	622.53	622.53
9	C6_30d p tmx_ddx6_034.nd2	1724.53	1712	12.53	12.53
10	C6_30d p tmx_ddx6_033.nd2	2670.29	2125.08	545.21	545.21
11	C6_30d p tmx_ddx6_033.nd2	2432.67	2157.95	274.72	274.72
12	C6_30d p tmx_ddx6_032.nd2	2528.91	2245.22	283.69	283.69
13	C6_30d p tmx_ddx6_031.nd2	2346.28	2138.69	207.59	207.59
14	C6_30d p tmx_ddx6_030.nd2	1445.31	1420.79	24.52	24.52
15	C6_30d p tmx_ddx6_030.nd2	1648.78	1324.93	323.85	323.85
16	C6_30d p tmx_ddx6_029.nd2	2000.28	1442.97	557.31	557.31
17	C6_30d p tmx_ddx6_028.nd2	1594.77	1330.28	264.49	264.49
18	C6_30d p tmx_ddx6_027.nd2	1520.83	1248.39	272.44	272.44
19	C6_30d p tmx_ddx6_027.nd2	1951.86	1371.38	580.48	580.48
20	C6_30d p tmx_ddx6_026.nd2	1675.91	1181.7	494.21	494.21
21	C6_30d p tmx_ddx6_025.nd2	1792.32	1430.19	362.13	362.13
22	C6_30d p tmx_ddx6_024.nd2	1977.25	1879.86	97.39	97.39
23	C6_30d p tmx_ddx6_023.nd2	1958.32	2160.11	-201.79	0
24	C6_30d p tmx_ddx6_022.nd2	1989.18	1736.02	253.16	253.16
25	C6_30d p tmx_ddx6_021.nd2	1312.59	1378.53	-65.94	0
26	C6_30d p tmx_ddx6_020.nd2	2613.81	2368.78	245.03	245.03
27	C6_30d p tmx_ddx6_020.nd2	2391.31	2052.19	339.12	339.12
28	C6_30d p tmx_ddx6_019.nd2	2354.06	2005.07	348.99	348.99
29	C6_30d p tmx_ddx6_019.nd2	2273.18	2170.19	102.99	102.99
30	C6_30d p tmx_ddx6_018.nd2	2116.54	1749.02	367.52	367.52
31	C6_30d p tmx_ddx6_017.nd2	2708.31	2574.41	133.9	133.9
32	C6_30d p tmx_ddx6_016.nd2	2395.61	2078.07	317.54	317.54
33	C6_30d p tmx_ddx6_015.nd2	2306.92	2054.78	252.14	252.14
34	C6_30d p tmx_ddx6_015.nd2	2480.57	1981.27	499.3	499.3
35	C6_30d p tmx_ddx6_014.nd2	1525.56	1578.57	-53.01	0
36	C6_30d p tmx_ddx6_013.nd2	1498.96	1109.21	389.75	389.75
37	C6_30d p tmx_ddx6_012.nd2	1416.19	1165.71	250.48	250.48
38	C6_30d p tmx_ddx6_011.nd2	1397.26	1346.33	50.93	50.93
39	C6_30d p tmx_ddx6_010.nd2	2436.34	2567.35	-131.01	0
40	C6_30d p tmx_ddx6_009.nd2	3251.31	3110.81	140.5	140.5
41	C6_30d p tmx_ddx6_008.nd2	2748.93	2392.16	356.77	356.77
42	C6_30d p tmx_ddx6_007.nd2	1769.41	1754.64	14.77	14.77
43	C6_30d p tmx_ddx6_006.nd2	1891.13	1972.65	-81.52	0
44	C6_30d p tmx_ddx6_005.nd2	2227.61	1957.12	270.49	270.49
45	C6_30d p tmx_ddx6_004.nd2	1473.63	1496.72	-23.09	0
46	C6_30d p tmx_ddx6_003.nd2	1352.08	1346.89	5.19	5.19
47	C6_30d p tmx_ddx6_002.nd2	1664.6	1164.44	500.16	500.16
48	C6_30d p tmx_ddx6_001.nd2	1246.16	1134.4	111.76	111.76
49	C6_30d p tmx_ddx6_001.nd2	1211.95	1050.56	161.39	161.39
50	C6_30d p tmx_ddx6_079.nd2	2035.14	2099	-63.86	0
51	C6_30d p tmx_ddx6_078.nd2	2291.07	2203.23	87.84	87.84
52	C6_30d p tmx_ddx6_077.nd2	2152.42	2248.72	-96.3	0
53	C6_30d p tmx_ddx6_077.nd2	2522.74	2131.92	390.82	390.82
54	C6_30d p tmx_ddx6_076.nd2	2829.11	2396.62	432.49	432.49
55	C6_30d p tmx_ddx6_076.nd2	2300.88	2528.13	-227.25	0
56	C6_30d p tmx_ddx6_075.nd2	1759.59	1576.73	182.86	182.86
57	C6_30d p tmx_ddx6_075.nd2	1816.69	1651.88	164.81	164.81
58	C6_30d p tmx_ddx6_074.nd2	1819.52	1516.42	303.1	303.1
59	C6_30d p tmx_ddx6_074.nd2	1814.29	1633.18	181.11	181.11
60	C6_30d p tmx_ddx6_073.nd2	1970.17	1635.67	334.5	334.5
61	C6_30d p tmx_ddx6_072.nd2	2150.38	2031.87	118.51	118.51
62	C6_30d p tmx_ddx6_071.nd2	2472.96	2288.79	184.17	184.17
63	C6_30d p tmx_ddx6_070.nd2	2361.36	3071.11	-709.75	0
64	C6_30d p tmx_ddx6_069.nd2	1302.71	1450.91	-148.2	0
65	C6_30d p tmx_ddx6_068.nd2	2056.97	2013.03	43.94	43.94
66	C6_30d p tmx_ddx6_067.nd2	2827.46	2533.93	293.53	293.53
67	C6_30d p tmx_ddx6_066.nd2	2091.35	2031.75	59.6	59.6
68	C6_30d p tmx_ddx6_066.nd2	1779.76	1816.76	-37	0
69	C6_30d p tmx_ddx6_064.nd2	2343.76	2065.08	278.68	278.68
70	C6_30d p tmx_ddx6_064.nd2	2614.88	1988.51	626.37	626.37
71	C6_30d p tmx_ddx6_064.nd2	2223.51	2097.79	125.72	125.72
72	C6_30d p tmx_ddx6_063.nd2	1599.18	1193.86	405.32	405.32
73	C6_30d p tmx_ddx6_062.nd2	2557.93	2205.95	351.98	351.98
74	C6_30d p tmx_ddx6_062.nd2	2439.3	2001.85	437.45	437.45
75	C6_30d p tmx_ddx6_060.nd2	1766.07	1962.12	-196.05	0
76	C6_30d p tmx_ddx6_059.nd2	2036.22	2224.5	-188.28	0
77	C6_30d p tmx_ddx6_059.nd2	1909.18	2010.87	-101.69	0
78	C6_30d p tmx_ddx6_058.nd2	1844.75	1927.92	-83.17	0
79	C6_30d p tmx_ddx6_057.nd2	1774.33	1882.76	-108.43	0
80	C6_30d p tmx_ddx6_056.nd2	2586.13	2764.17	-178.04	0
81	C6_30d p tmx_ddx6_055.nd2	1686.91	1519.51	167.4	167.4
82	C6_30d p tmx_ddx6_054.nd2	2306.24	1991.55	314.69	314.69
83	C6_30d p tmx_ddx6_053.nd2	1933.05	1666.95	266.1	266.1
84	C6_30d p tmx_ddx6_053.nd2	1719.83	1676.98	42.85	42.85
85	C6_30d p tmx_ddx6_052.nd2	2142.88	2074.42	68.46	68.46
86	C6_30d p tmx_ddx6_051.nd2	2000.45	1778.92	221.53	221.53
87	C6_30d p tmx_ddx6_050.nd2	1916.28	2054.25	-137.97	0
88	C6_30d p tmx_ddx6_049.nd2	1989.03	1506.65	482.38	482.38
89	C6_30d p tmx_ddx6_048.nd2	2627.86	3016.59	-388.73	0
90	C6_30d p tmx_ddx6_047.nd2	3181.47	2559.91	621.56	621.56
91	C6_30d p tmx_ddx6_046.nd2	2628.34	2623.99	4.35	4.35
92	C6_30d p tmx_ddx6_045.nd2	2102.49	2075.08	27.41	27.41
93	C6_30d p tmx_ddx6_044.nd2	1695.14	1343.47	351.67	351.67
94	C6_30d p tmx_ddx6_043.nd2	1367.76	1376.38	-8.62	0
95	C6_30d p tmx_ddx6_042.nd2	1508.41	1323.1	185.31	185.31
96	C6_30d p tmx_ddx6_041.nd2	2649.17	2159.65	489.52	489.52

## Sheet: Expt5_042916
Item	Source	ddx6 (GFP) Mean Intensity	GFP background	ddx6 intensity- background intensity	Corrected minus to zeros
1	E5_30d p TMX_Pax7+ddx6 030.nd2	2063.95	2005.57	58.38	58.38		StDev	112.234
2	E5_30d p TMX_Pax7+ddx6 029.nd2	2394.11	2445.76	-51.65	0		Variance	12596.4
3	E5_30d p TMX_Pax7+ddx6 028.nd2	1828.06	1742.6	85.46	85.46
4	E5_30d p TMX_Pax7+ddx6 027.nd2	2346.46	2275.82	70.64	70.64
5	E5_30d p TMX_Pax7+ddx6 026.nd2	2872.82	2949.5	-76.68	0
6	E5_30d p TMX_Pax7+ddx6 025.nd2	2236.58	2029.46	207.12	207.12
7	E5_30d p TMX_Pax7+ddx6 024.nd2	2792.88	2894.47	-101.59	0
8	E5_30d p TMX_Pax7+ddx6 023.nd2	1149.33	1532.71	-383.38	0
9	E5_30d p TMX_Pax7+ddx6 022.nd2	1241.97	1674.3	-432.33	0
10	E5_30d p TMX_Pax7+ddx6 022.nd2	1951.12	2469.59	-518.47	0
11	E5_30d p TMX_Pax7+ddx6 021.nd2	3402.19	3416.15	-13.96	0
12	E5_30d p TMX_Pax7+ddx6 020.nd2	1254.17	1305.74	-51.57	0
13	E5_30d p TMX_Pax7+ddx6 019.nd2	2593.39	2685.16	-91.77	0
14	E5_30d p TMX_Pax7+ddx6 018.nd2	2300.56	2332.24	-31.68	0
15	E5_30d p TMX_Pax7+ddx6 017.nd2	2194.57	2038.13	156.44	156.44
16	E5_30d p TMX_Pax7+ddx6 016.nd2	1562.78	1730	-167.22	0
17	E5_30d p TMX_Pax7+ddx6 015.nd2	2164.13	1924.02	240.11	240.11
18	E5_30d p TMX_Pax7+ddx6 014.nd2	1479.28	1468.88	10.4	10.4
19	E5_30d p TMX_Pax7+ddx6 013.nd2	1605.7	1365.75	239.95	239.95
20	E5_30d p TMX_Pax7+ddx6 013.nd2	1540.52	1431.89	108.63	108.63
21	E5_30d p TMX_Pax7+ddx6 012.nd2	2218.71	2138.82	79.89	79.89
22	E5_30d p TMX_Pax7+ddx6 011.nd2	3619.2	3608.85	10.35	10.35
23	E5_30d p TMX_Pax7+ddx6 010.nd2	2159.34	2713.7	-554.36	0
24	E5_30d p TMX_Pax7+ddx6 009.nd2	2159.39	2083.45	75.94	75.94
25	E5_30d p TMX_Pax7+ddx6 008.nd2	3336.63	3433.19	-96.56	0
26	E5_30d p TMX_Pax7+ddx6 007.nd2	1735.14	1668.1	67.04	67.04
27	E5_30d p TMX_Pax7+ddx6 006.nd2	2846.13	2801.65	44.48	44.48
28	E5_30d p TMX_Pax7+ddx6 005.nd2	2363.57	2754.33	-390.76	0
29	E5_30d p TMX_Pax7+ddx6 004.nd2	2077.64	1954.12	123.52	123.52
30	E5_30d p TMX_Pax7+ddx6 003.nd2	2931.74	2754.75	176.99	176.99
31	E5_30d p TMX_Pax7+ddx6 002.nd2	1252.75	1150.06	102.69	102.69
32	E5_30d p TMX_Pax7+ddx6 056.nd2	2171.99	2029.95	142.04	142.04
33	E5_30d p TMX_Pax7+ddx6 055.nd2	3195.57	3400.74	-205.17	0
34	E5_30d p TMX_Pax7+ddx6 054.nd2	2733.77	2953.38	-219.61	0
35	E5_30d p TMX_Pax7+ddx6 053.nd2	1965.88	1765.14	200.74	200.74
36	E5_30d p TMX_Pax7+ddx6 052.nd2	2998.25	2654.37	343.88	343.88
37	E5_30d p TMX_Pax7+ddx6 051.nd2	3243.94	3158.11	85.83	85.83
38	E5_30d p TMX_Pax7+ddx6 050.nd2	2224.82	2045.56	179.26	179.26
39	E5_30d p TMX_Pax7+ddx6 049.nd2	2870.85	2946.49	-75.64	0
40	E5_30d p TMX_Pax7+ddx6 048.nd2	2173.27	2245.47	-72.2	0
41	E5_30d p TMX_Pax7+ddx6 047.nd2	2343.47	2452.9	-109.43	0
42	E5_30d p TMX_Pax7+ddx6 046.nd2	1690.72	2068.32	-377.6	0
43	E5_30d p TMX_Pax7+ddx6 045.nd2	1751.89	2586.06	-834.17	0
44	E5_30d p TMX_Pax7+ddx6 045.nd2	1798.09	2649.42	-851.33	0
45	E5_30d p TMX_Pax7+ddx6 044.nd2	2520.47	2427	93.47	93.47
46	E5_30d p TMX_Pax7+ddx6 043.nd2	2057.96	1950.77	107.19	107.19
47	E5_30d p TMX_Pax7+ddx6 042.nd2	2052.31	1750.78	301.53	301.53
48	E5_30d p TMX_Pax7+ddx6 041.nd2	2015.26	1964.24	51.02	51.02
49	E5_30d p TMX_Pax7+ddx6 040.nd2	2084.05	1666.26	417.79	417.79
50	E5_30d p TMX_Pax7+ddx6 039.nd2	2088.49	2155.31	-66.82	0
51	E5_30d p TMX_Pax7+ddx6 038.nd2	1759.81	2431.69	-671.88	0
52	E5_30d p TMX_Pax7+ddx6 037.nd2	2916.63	2936.19	-19.56	0
53	E5_30d p TMX_Pax7+ddx6 036.nd2	2710.1	2665.74	44.36	44.36
54	E5_30d p TMX_Pax7+ddx6 035.nd2	2841.42	2938.75	-97.33	0
55	E5_30d p TMX_Pax7+ddx6 035.nd2	2223.3	2066.93	156.37	156.37
56	E5_30d p TMX_Pax7+ddx6 034.nd2	2883.81	2738.28	145.53	145.53
57	E5_30d p TMX_Pax7+ddx6 033.nd2	3260.11	3247.51	12.6	12.6
58	E5_30d p TMX_Pax7+ddx6 033.nd2	2684.19	2341.93	342.26	342.26
59	E5_30d p TMX_Pax7+ddx6 032.nd2	3041.37	2704.78	336.59	336.59
60	E5_30d p TMX_Pax7+ddx6 032.nd2	3832.13	3696.26	135.87	135.87
61	E5_30d p TMX_Pax7+ddx6 031.nd2	2150.13	1790.26	359.87	359.87

## Sheet: Ctrl5_031020
Item	Source	ddx6 (GFP) Mean Intensity	GFP background	ddx6 intensity- background intensity	Corrected minus to zeros
1	C5_30d p tmx_Pax7+DDX6 023.nd2	1335.01	1088.39	246.62	246.62		StDev	175.638
2	C5_30d p tmx_Pax7+DDX6 022.nd2	1555.51	1213.9	341.61	341.61		Variance	30848.6
3	C5_30d p tmx_Pax7+DDX6 021.nd2	2300.48	2312.17	-11.69	0
4	C5_30d p tmx_Pax7+DDX6 020.nd2	1985.12	1831.78	153.34	153.34
5	C5_30d p tmx_Pax7+DDX6 019.nd2	1761.66	1713.46	48.2	48.2
6	C5_30d p tmx_Pax7+DDX6 018.nd2	2122.42	1772.87	349.55	349.55
7	C5_30d p tmx_Pax7+DDX6 017.nd2	1747.38	1624.15	123.23	123.23
8	C5_30d p tmx_Pax7+DDX6 017.nd2	1894.49	1861.3	33.19	33.19
9	C5_30d p tmx_Pax7+DDX6 015.nd2	2321.22	2252.93	68.29	68.29
10	C5_30d p tmx_Pax7+DDX6 014.nd2	2215.71	1677.31	538.4	538.4
11	C5_30d p tmx_Pax7+DDX6 013.nd2	1337.13	1094.08	243.05	243.05
12	C5_30d p tmx_Pax7+DDX6 012.nd2	1918.89	1843.49	75.4	75.4
13	C5_30d p tmx_Pax7+DDX6 011.nd2	1818.84	1446.39	372.45	372.45
14	C5_30d p tmx_Pax7+DDX6 010.nd2	1912.88	1799.21	113.67	113.67
15	C5_30d p tmx_Pax7+DDX6 009.nd2	1872.2	1808.46	63.74	63.74
16	C5_30d p tmx_Pax7+DDX6 008.nd2	2408.99	2593.43	-184.44	0
17	C5_30d p tmx_Pax7+DDX6 007.nd2	1939.42	1850.62	88.8	88.8
18	C5_30d p tmx_Pax7+DDX6 006.nd2	1280.05	1133.1	146.95	146.95
19	C5_30d p tmx_Pax7+DDX6 005.nd2	1610.54	1361.35	249.19	249.19
20	C5_30d p tmx_Pax7+DDX6 005.nd2	1731.48	2306.99	-575.51	0
21	C5_30d p tmx_Pax7+DDX6 004.nd2	1751.19	1879.39	-128.2	0
22	C5_30d p tmx_Pax7+DDX6 003.nd2	1751.5	1753.86	-2.36	0
23	C5_30d p tmx_Pax7+DDX6 002.nd2	1582.67	1551.26	31.41	31.41
24	C5_30d p tmx_Pax7+DDX6 001.nd3	2016.76	1561.45	455.31	455.31
25	C5_30d p tmx_Pax7+DDX6 046.nd2	1725.42	1833.95	-108.53	0
26	C5_30d p tmx_Pax7+DDX6 045.nd2	2845.75	2419.37	426.38	426.38
27	C5_30d p tmx_Pax7+DDX6 044.nd2	1834.38	1932.71	-98.33	0
28	C5_30d p tmx_Pax7+DDX6 043.nd2	2774.42	2484.54	289.88	289.88
29	C5_30d p tmx_Pax7+DDX6 042.nd2	2005.84	1653.92	351.92	351.92
30	C5_30d p tmx_Pax7+DDX6 041.nd2	1646.74	1413.84	232.9	232.9
31	C5_30d p tmx_Pax7+DDX6 040.nd2	1494.2	1460.47	33.73	33.73
32	C5_30d p tmx_Pax7+DDX6 039.nd2	1868.45	1445.98	422.47	422.47
33	C5_30d p tmx_Pax7+DDX6 038.nd2	1963.09	1317.25	645.84	645.84
34	C5_30d p tmx_Pax7+DDX6 037.nd2	1218.67	1022.31	196.36	196.36
35	C5_30d p tmx_Pax7+DDX6 035.nd2	2553.14	2406.41	146.73	146.73
36	C5_30d p tmx_Pax7+DDX6 034.nd2	2007.39	1965.48	41.91	41.91
37	C5_30d p tmx_Pax7+DDX6 034.nd2	1982.9	2003.42	-20.52	0
38	C5_30d p tmx_Pax7+DDX6 033.nd2	2263.03	2269.37	-6.34	0
39	C5_30d p tmx_Pax7+DDX6 032.nd2	2270.52	1742.93	527.59	527.59
40	C5_30d p tmx_Pax7+DDX6 031.nd2	1544.47	1173.16	371.31	371.31
41	C5_30d p tmx_Pax7+DDX6 030.nd2	1070.91	1012.11	58.8	58.8
42	C5_30d p tmx_Pax7+DDX6 028.nd2	1523.26	1487.83	35.43	35.43
43	C5_30d p tmx_Pax7+DDX6 027.nd2	1337.61	1030.37	307.24	307.24
44	C5_30d p tmx_Pax7+DDX6 027.nd2	1687.54	1436.02	251.52	251.52
45	C5_30d p tmx_Pax7+DDX6 026.nd2	1483.1	1037.49	445.61	445.61
46	C5_30d p tmx_Pax7+DDX6 025.nd2	1530.71	1393.35	137.36	137.36
47	C5_30d p tmx_Pax7+DDX6 024.nd2	1247.52	1051.3	196.22	196.22
48	C5_30d p tmx_Pax7+DDX6 069.nd2	1700.17	1103.99	596.18	596.18
49	C5_30d p tmx_Pax7+DDX6 069.nd2	1115.05	1031.7	83.35	83.35
50	C5_30d p tmx_Pax7+DDX6 068.nd2	1266.79	1019.03	247.76	247.76
51	C5_30d p tmx_Pax7+DDX6 067.nd2	1425.03	1170.38	254.65	254.65
52	C5_30d p tmx_Pax7+DDX6 067.nd2	1732.53	1373.03	359.5	359.5
53	C5_30d p tmx_Pax7+DDX6 066.nd2	1595.13	1325.56	269.57	269.57
54	C5_30d p tmx_Pax7+DDX6 066.nd2	1908.13	1390.74	517.39	517.39
55	C5_30d p tmx_Pax7+DDX6 065.nd2	1247.07	1074.39	172.68	172.68
56	C5_30d p tmx_Pax7+DDX6 064.nd2	2211.82	1957.75	254.07	254.07
57	C5_30d p tmx_Pax7+DDX6 063.nd2	2478.2	2273.13	205.07	205.07
58	C5_30d p tmx_Pax7+DDX6 062.nd2	2616.3	2289.61	326.69	326.69
59	C5_30d p tmx_Pax7+DDX6 060.nd2	1044.78	872.98	171.8	171.8
60	C5_30d p tmx_Pax7+DDX6 059.nd2	1222.51	1046.1	176.41	176.41
61	C5_30d p tmx_Pax7+DDX6 058.nd2	2812.62	2625.97	186.65	186.65
62	C5_30d p tmx_Pax7+DDX6 057.nd2	1783.55	1793.42	-9.87	0
63	C5_30d p tmx_Pax7+DDX6 057.nd2	1826.59	1668.28	158.31	158.31
64	C5_30d p tmx_Pax7+DDX6 056.nd2	1867.47	1629.37	238.1	238.1
65	C5_30d p tmx_Pax7+DDX6 056.nd2	1977.23	1571.55	405.68	405.68
66	C5_30d p tmx_Pax7+DDX6 055.nd2	1840.5	1676.65	163.85	163.85
67	C5_30d p tmx_Pax7+DDX6 054.nd2	1710.93	1243.73	467.2	467.2
68	C5_30d p tmx_Pax7+DDX6 053.nd2	1304.23	1012.3	291.93	291.93
69	C5_30d p tmx_Pax7+DDX6 052.nd2	1239.25	1108.58	130.67	130.67
70	C5_30d p tmx_Pax7+DDX6 051.nd2	1612.1	1561.88	50.22	50.22
71	C5_30d p tmx_Pax7+DDX6 050.nd2	1733.8	1320.17	413.63	413.63
72	C5_30d p tmx_Pax7+DDX6 050.nd2	2401.34	2096.92	304.42	304.42
73	C5_30d p tmx_Pax7+DDX6 048.nd2	1315	1032.25	282.75	282.75
74	C5_30d p tmx_Pax7+DDX6 047.nd2	1770.51	1562.38	208.13	208.13
75	C5_30d p tmx_Pax7+DDX6 076.nd2	2277.99	1973.86	304.13	304.13
76	C5_30d p tmx_Pax7+DDX6 075.nd2	2828.89	2039.98	788.91	788.91
77	C5_30d p tmx_Pax7+DDX6 074.nd2	1512.17	1478.29	33.88	33.88
78	C5_30d p tmx_Pax7+DDX6 073.nd2	1775.46	1473.14	302.32	302.32
79	C5_30d p tmx_Pax7+DDX6 072.nd2	1348.36	1156.27	192.09	192.09
80	C5_30d p tmx_Pax7+DDX6 071.nd2	1599.14	1124.83	474.31	474.31
81	C5_30d p tmx_Pax7+DDX6 071.nd2	1230.27	1241.91	-11.64	0
82	C5_30d p tmx_Pax7+DDX6 070.nd2	1196.12	1068.41	127.71	127.71

## Sheet: Expt3_031020
Item	Source	ddx6 (GFP) Mean Intensity	GFP background	ddx6 intensity- background intensity	Corrected minus to zeros
1	E3_30d p TMX_Pax7+DDX6 023.nd2	1256.14	1055.3	200.84	200.84		StDev	100.95
2	E3_30d p TMX_Pax7+DDX6 022.nd2	991.94	900.62	91.32	91.32		Variance	10190.8
3	E3_30d p TMX_Pax7+DDX6 021.nd2	945.05	864.93	80.12	80.12
4	E3_30d p TMX_Pax7+DDX6 020.nd2	1200.77	1135.27	65.5	65.5
5	E3_30d p TMX_Pax7+DDX6 018.nd2	1183.58	1115.33	68.25	68.25
6	E3_30d p TMX_Pax7+DDX6 017.nd2	1402.45	1304.28	98.17	98.17
7	E3_30d p TMX_Pax7+DDX6 016.nd2	1284.78	1252.67	32.11	32.11
8	E3_30d p TMX_Pax7+DDX6 015.nd2	1216.62	1118.3	98.32	98.32
9	E3_30d p TMX_Pax7+DDX6 014.nd2	1253.46	1069.26	184.2	184.2
10	E3_30d p TMX_Pax7+DDX6 013.nd2	1633.15	1512.6	120.55	120.55
11	E3_30d p TMX_Pax7+DDX6 012.nd2	1644.9	1489.91	154.99	154.99
12	E3_30d p TMX_Pax7+DDX6 011.nd2	1012.12	988.56	23.56	23.56
13	E3_30d p TMX_Pax7+DDX6 010.nd2	1475.16	1220.21	254.95	254.95
14	E3_30d p TMX_Pax7+DDX6 010.nd2	954.69	900.58	54.11	54.11
15	E3_30d p TMX_Pax7+DDX6 009.nd2	1513.55	1470.51	43.04	43.04
16	E3_30d p TMX_Pax7+DDX6 007.nd2	1377.67	1078.77	298.9	298.9
17	E3_30d p TMX_Pax7+DDX6 006.nd2	1781.75	1738.9	42.85	42.85
18	E3_30d p TMX_Pax7+DDX6 005.nd2	1505.71	1540.11	-34.4	0
19	E3_30d p TMX_Pax7+DDX6 004.nd2	850.89	794.78	56.11	56.11
20	E3_30d p TMX_Pax7+DDX6 003.nd2	985.85	840.72	145.13	145.13
21	E3_30d p TMX_Pax7+DDX6 003.nd2	817.44	781.34	36.1	36.1
22	E3_30d p TMX_Pax7+DDX6 002.nd2	865.5	850.33	15.17	15.17
23	E3_30d p TMX_Pax7+DDX6 001.nd2	1014.11	909.48	104.63	104.63
24	E3_30d p TMX_Pax7+DDX6 046.nd2	2146.81	1970.23	176.58	176.58
25	E3_30d p TMX_Pax7+DDX6 045.nd2	1240.2	1063.55	176.65	176.65
26	E3_30d p TMX_Pax7+DDX6 044.nd2	1673.08	1681.17	-8.09	0
27	E3_30d p TMX_Pax7+DDX6 043.nd2	1649.15	1803.98	-154.83	0
28	E3_30d p TMX_Pax7+DDX6 042.nd2	1717.24	1623.41	93.83	93.83
29	E3_30d p TMX_Pax7+DDX6 041.nd2	1417.86	1031.81	386.05	386.05
30	E3_30d p TMX_Pax7+DDX6 040.nd2	1601.9	1572.64	29.26	29.26
31	E3_30d p TMX_Pax7+DDX6 039.nd2	1003.33	887.77	115.56	115.56
32	E3_30d p TMX_Pax7+DDX6 039.nd2	1451.31	1390.86	60.45	60.45
33	E3_30d p TMX_Pax7+DDX6 038.nd2	1723.94	1399.34	324.6	324.6
34	E3_30d p TMX_Pax7+DDX6 037.nd2	1192.11	1145.18	46.93	46.93
35	E3_30d p TMX_Pax7+DDX6 036.nd2	1369.99	1315.84	54.15	54.15
36	E3_30d p TMX_Pax7+DDX6 036.nd2	1204.77	1361.45	-156.68	0
37	E3_30d p TMX_Pax7+DDX6 035.nd2	1460.21	1451.74	8.47	8.47
38	E3_30d p TMX_Pax7+DDX6 034.nd2	925.72	869.03	56.69	56.69
39	E3_30d p TMX_Pax7+DDX6 033.nd2	1069.08	971.63	97.45	97.45
40	E3_30d p TMX_Pax7+DDX6 032.nd2	1243.94	1113.15	130.79	130.79
41	E3_30d p TMX_Pax7+DDX6 030.nd2	1501.3	1142.09	359.21	359.21
42	E3_30d p TMX_Pax7+DDX6 029.nd2	2521.67	2449.18	72.49	72.49
43	E3_30d p TMX_Pax7+DDX6 029.nd2	3194.22	3398.07	-203.85	0
44	E3_30d p TMX_Pax7+DDX6 028.nd2	1582.43	1387.53	194.9	194.9
45	E3_30d p TMX_Pax7+DDX6 027.nd2	1203.91	1090.82	113.09	113.09
46	E3_30d p TMX_Pax7+DDX6 026.nd2	1575.92	1438.14	137.78	137.78
47	E3_30d p TMX_Pax7+DDX6 025.nd2	1407.41	1329.2	78.21	78.21
48	E3_30d p TMX_Pax7+DDX6 024.nd2	1525.8	1423.77	102.03	102.03
49	E3_30d p TMX_Pax7+DDX6 067.nd2	1495.53	1379.92	115.61	115.61
50	E3_30d p TMX_Pax7+DDX6 066.nd2	1302.99	1199.38	103.61	103.61
51	E3_30d p TMX_Pax7+DDX6 065.nd2	2971.05	3740.4	-769.35	0
52	E3_30d p TMX_Pax7+DDX6 065.nd2	2862.64	3111.37	-248.73	0
53	E3_30d p TMX_Pax7+DDX6 064.nd2	882.53	892.16	-9.63	0
54	E3_30d p TMX_Pax7+DDX6 063.nd2	2260.37	2090.04	170.33	170.33
55	E3_30d p TMX_Pax7+DDX6 063.nd2	1538.36	1351.34	187.02	187.02
56	E3_30d p TMX_Pax7+DDX6 062.nd2	991.77	952.49	39.28	39.28
57	E3_30d p TMX_Pax7+DDX6 061.nd2	1185.98	1113.14	72.84	72.84
58	E3_30d p TMX_Pax7+DDX6 060.nd2	1864.34	1890.64	-26.3	0
59	E3_30d p TMX_Pax7+DDX6 059.nd2	1647.07	1797.95	-150.88	0
60	E3_30d p TMX_Pax7+DDX6 058.nd2	1377.73	1395.46	-17.73	0
61	E3_30d p TMX_Pax7+DDX6 056.nd2	1558.87	1648.2	-89.33	0
62	E3_30d p TMX_Pax7+DDX6 055.nd2	1519.23	1446.08	73.15	73.15
63	E3_30d p TMX_Pax7+DDX6 054.nd2	1919.04	1900.79	18.25	18.25
64	E3_30d p TMX_Pax7+DDX6 053.nd2	1445.42	1351.07	94.35	94.35
65	E3_30d p TMX_Pax7+DDX6 052.nd2	2805.14	2477.38	327.76	327.76
66	E3_30d p TMX_Pax7+DDX6 051.nd2	1972.7	1868.76	103.94	103.94
67	E3_30d p TMX_Pax7+DDX6 050.nd2	1923.59	1863.09	60.5	60.5
68	E3_30d p TMX_Pax7+DDX6 049.nd2	1600.2	1168.68	431.52	431.52
69	E3_30d p TMX_Pax7+DDX6 048.nd2	1605.85	1371.42	234.43	234.43
70	E3_30d p TMX_Pax7+DDX6 047.nd2	1703.06	2156.08	-453.02	0
