# Supplementary material for: Heterogeneous levels of delta-like 4 within a multinucleated niche cell maintains muscle stem cell diversity
Source: eLife. 2022 Dec 30;11:e68180. doi: 10.7554/eLife.68180 (PMC9803355; doi:10.7554/eLife.68180)
Supplement: Figure 3—source data 6. [file elife-68180-fig3-data6.xlsx]

## Sheet: Ctrl3_042916
Dll4fl/fl	Ctrl 3_042916
At Tissue Homeostasis
30d after tmx
	# of Pax7+ SCs	Area (mm2)	# of Pax7+ SCs/mm2 tissue section	Average
Section 1-001	18	1.39
Section 1-002	23	1.47
Section 1-003	12	0.74
Section 1-004	18	0.83
Section 1-005	26	1.13
Section 1-006	8	0.7
	105	6.26	16.7732	15.1517
Section2-001	27	1.41
Section2-002	17	1.38
Section2-003	10	0.97
Section2-004	6	0.49
Section2-005	20	1.53
Section2-006	7	0.65
	87	6.43	13.5303

## Sheet: Expt2_042916
mCre- Dll4fl/fl	Expt 2_042916
At Tissue Homeostasis
30d after tmx
	# of Pax7+ SCs	Area (mm2)	# of Pax7+ SCs/mm2 tissue section	Average
Section 1-001	9	1.13
Section 1-002	13	0.78
Section 1-003	6	1.53
Section 1-004	12	1.95
Section 1-005	8	1.15
	48	6.54	7.33945	8.43851
Section2-001	9	0.99
Section2-002	16	1.27
Section2-003	11	0.94
Section2-004	13	0.98
Section2-005	12	2.01
Section2-006	5	0.73
	66	6.92	9.53757

## Sheet: Expt5_042916
mCre- Dll4fl/fl	Expt 5_042916
At Tissue Homeostasis
30d after tmx
	# of Pax7+ SCs	Area (mm2)	# of Pax7+ SCs/mm2 tissue section	Average
Section 1-001	9	0.9
Section 1-002	11	1.21
Section 1-003	2	0.54
Section 1-004	2	0.89
Section 1-005	7	0.91
	31	4.45	6.96629	6.58488
Section2-001	4	0.62
Section2-002	3	0.82
Section2-003	7	1.19
Section2-004	7	0.43
Section2-005	4	0.97
	25	4.03	6.20347

## Sheet: Ctrl4_050216
Dll4fl/fl	Ctrl 4_050216
At Tissue Homeostasis
30d after tmx
	# of Pax7+ SCs	Area (mm2)	# of Pax7+ SCs/mm2 tissue section	Average
Section 1-001	11	0.65
Section 1-002	15	0.8
Section 1-003	31	1.66
Section 1-004	12	1.04
Section 1-005	15	1.3
Section 1-006	12	0.9
Section 1-007	12	0.74
	108	7.09	15.2327	16.9167
Section2-001	19	0.41
Section2-002	29	1.08
Section2-003	12	0.81
Section2-004	18	1.36
Section2-005	15	1.23
Section2-006	16	0.97
	109	5.86	18.6007

## Sheet: Ctrl6_050216
Dll4fl/fl	Ctrl 6_050216
At Tissue Homeostasis
30d after tmx
	# of Pax7+ SCs	Area (mm2)	# of Pax7+ SCs/mm2 tissue section	Average
Section 1-001	7	0.55
Section 1-002	15	1.45
Section 1-003	5	0.84
Section 1-004	16	1.02
Section 1-005	23	1.87
Section 1-006	25	1.6
	91	7.33	12.4147	12.417
Section2-001	5	0.45
Section2-002	9	1.15
Section2-003	17	1.04
Section2-004	9	0.66
Section2-005	16	1.44
Section2-006	21	1.46
	77	6.2	12.4194

## Sheet: Expt7_050216
mCre- Dll4fl/fl	Expt 7_050216
At Tissue Homeostasis
30d after tmx
	# of Pax7+ SCs	Area (mm2)	# of Pax7+ SCs/mm2 tissue section	Average
Section 1-001	11	1.21
Section 1-002	9	0.94
Section 1-003	15	1.51
Section 1-004	8	2.11
Section 1-005	11	1.2
	54	6.97	7.74749	6.84532
Section2-001	4	1.41
Section2-002	5	1.15
Section2-003	9	1.88
Section2-004	15	2.13
Section2-005	13	1.17
	46	7.74	5.94315

## Sheet: Ctrl5_031020
Dll4fl/fl	Ctrl 5_031020
At Tissue Homeostasis
30d after tmx
	# of Pax7+ SCs	Area (mm2)	# of Pax7+ SCs/mm2 tissue section	Average
Section 1-001	15	1.54
Section 1-002	21	1.61
Section 1-003	9	0.37
Section 1-004	10	1.58
Section 1-005	18	0.68
	73	5.78	12.6298	12.4124
Section2-001	22	1.67
Section2-002	15	1.64
Section2-003	7	0.45
Section2-004	17	1.49
Section2-005	4	0.08
	65	5.33	12.1951

## Sheet: Expt3_031020
mCre- Dll4fl/fl	Expt3_031020
At Tissue Homeostasis
30d after tmx
	# of Pax7+ SCs	Area (mm2)	# of Pax7+ SCs/mm2 tissue section	Average
Section 1-001	12	1.66
Section 1-002	10	1.61
Section 1-003	4	0.28
Section 1-004	5	0.78
Section 1-005	2	1.49
Section 1-006	2	0.2
	35	6.02	5.81395	6.60734
Section2-001	15	1.75
Section2-002	11	1.66
Section2-003	7	0.42
Section2-004	7	1.41
Section2-005	1	0.3
	41	5.54	7.40072
