# Supplementary material for: Heterogeneous levels of delta-like 4 within a multinucleated niche cell maintains muscle stem cell diversity
Source: eLife. 2022 Dec 30;11:e68180. doi: 10.7554/eLife.68180 (PMC9803355; doi:10.7554/eLife.68180)
Supplement: Figure 3—source data 7. [file elife-68180-fig3-data7.xlsx]

## Sheet: Ctrl7_021216
Pax7 Cre- Dll4	Ctrl 7_021216
At tissue homeostasis	28d chase
	# of Pax7+ SCs	Area (mm2)	# of Pax7+ SCs/mm2 tissue section	Average
Section 1-001	17	1.45
Section 1-002	10	1.38
Section 1-003	2	0.4
Section 1-004	6	0.82
Section 1-005	11	1.92
Section 1-006	4	0.43
Section 1-007	5	0.4
	55	6.8	8.08824	7.81619
Section2-001	8	1.8
Section2-002	13	1.55
Section2-003	5	1.25
Section2-004	10	1.29
Section2-005	11	0.34
	47	6.23	7.54414

## Sheet: Expt4_021216
Pax7 Cre- Dll4	Expt 4_021216
At tissue homeostasis	28d chase
	# of Pax7+ SCs	Area (mm2)	# of Pax7+ SCs/mm2 tissue section	Average
Section 1-001	11	1.36
Section 1-002	3	0.77
Section 1-003	17	1.75
Section 1-004	11	1.09
	42	4.97	8.4507	8.02394
Section2-001	15	1.7
Section2-002	2	0.92
Section2-003	14	1.66
Section2-004	12	1.38
	43	5.66	7.59717

## Sheet: Ctrl4_021716
Pax7 Cre- Dll4	Ctrl 4_021716
At tissue homeostasis	26d chase
	# of Pax7+ SCs	Area (mm2)	# of Pax7+ SCs/mm2 tissue section	Average
Section 1-001	16	1.49
Section 1-002	6	0.82
Section 1-003	5	0.89
Section 1-004	13	1.65
Section 1-005	8	0.89
Section 1-006	3	0.54
Section 1-007	19	1.78
	70	8.06	8.68486	9.79823
Section2-001	2	0.19
Section2-002	6	0.54
Section2-003	5	0.79
Section2-004	21	1.98
Section2-005	14	0.79
Section2-006	9	0.27
Section2-007	9	1.1
Section2-008	13	1.58
	79	7.24	10.9116

## Sheet: Expt 5_021716
Pax7 Cre- Dll4	Expt 5_021716
At tissue homeostasis	26d chase
	# of Pax7+ SCs	Area (mm2)	# of Pax7+ SCs/mm2 tissue section	Average
Section 1-001	8	1.01
Section 1-002	15	1.24
Section 1-003	4	0.23
Section 1-004	17	1.75
Section 1-005	13	1.88
	57	6.11	9.32897	10.5031
Section2-001	3	0.5
Section2-002	13	0.8
Section2-003	3	0.15
Section2-004	17	1.5
Section2-005	19	1.76
	55	4.71	11.6773

## Sheet: Ctrl1_040416
Pax7 Cre- Dll4	Ctrl 1_040416
At tissue homeostasis	30d chase
	# of Pax7+ SCs	Area (mm2)	# of Pax7+ SCs/mm2 tissue section	Average
Section 1-001	16	1.76
Section 1-002	6	0.31
Section 1-003	6	0.45
Section 1-004	18	1.54
Section 1-005	5	0.33
Section 1-006	21	1.63
	72	6.02	11.9601	12.41
Section2-001	24	1.74
Section2-002	20	1.47
Section2-003	8	0.56
Section2-004	4	0.34
Section2-005	11	1.1
	67	5.21	12.8599

## Sheet: Expt4_040416
Pax7 Cre- Dll4	Expt 4_040416
At tissue homeostasis	30d chase
	# of Pax7+ SCs	Area (mm2)	# of Pax7+ SCs/mm2 tissue section	Average
Section 1-001	19	1.77
Section 1-002	3	0.15
Section 1-003	11	1.12
Section 1-004	10	1.05
Section 1-005	15	1.43
	58	5.52	10.5072	10.8092
Section2-001	19	1.71
Section2-002	13	0.84
Section2-003	1	0.12
Section2-004	17	1.72
Section2-005	10	1.01
	60	5.4	11.1111
