# Supplementary material for: Heterogeneous levels of delta-like 4 within a multinucleated niche cell maintains muscle stem cell diversity
Source: eLife. 2022 Dec 30;11:e68180. doi: 10.7554/eLife.68180 (PMC9803355; doi:10.7554/eLife.68180)
Supplement: Figure 4—source data 1. [file elife-68180-fig4-data1.xlsx]

## Sheet: Reg-C4
Control 4	Regular dose tamoxifen
Section #	# of stem cells	Area of the tissue section	# of stem cells/mm2 tissue section
section 1	70	5.46	12.8205
section 2	100	7.18	13.9276
secton 3	97	7.23	13.4163
section 4	106	6.78	15.6342
			13.9497

## Sheet: Reg-C7
Control 7	Regular dose tamoxifen
Section #	# of stem cells	Area of the tissue section	# of stem cells/mm2 tissue section
section 1	95	5.55	17.1171
secion 2	105	6.34	16.5615
secton 3	108	7.08	15.2542
section 4	93	7.13	13.0435
			15.4941

## Sheet: Low-C4
Control 4	Low dose tamoxifen
Section #	# of stem cells	Area of the tissue section	# of stem cells/mm2 tissue section
section 1	99	6.32	15.6646
secion 2	89	5.11	17.4168
secton 3	75	4.57	16.4114
section 4	79	5.16	15.3101
			16.2007

## Sheet: Low-C1
Control 1	Low dose tamoxifen
Section #	# of stem cells	Area of the tissue section	# of stem cells/mm2 tissue section
section 1	102	6.55	15.5725
secion 2	104	6.26	16.6134
secton 3	80	5.35	14.9533
section 4	116	5.94	19.5286
			16.667

## Sheet: Reg-E2
Expt 2	Regular dose tamoxifen
Section #	# of stem cells	Area of the tissue section	# of stem cells/mm2 tissue section
section 1	40	7.64	5.2356
secion 2	39	8.94	4.36242
secton 3	46	6.01	7.65391
section 4	44	7.95	5.53459
			5.69663

## Sheet: Reg-E5
Expt 5	Regular dose tamoxifen
Section #	# of stem cells	Area of the tissue section	# of stem cells/mm2 tissue section
section 1	41	7.99	5.13141
secion 2	40	7.21	5.54785
secton 3	45	6.93	6.49351
section 4	36	6.51	5.52995
			5.67568

## Sheet: Low-E6
Expt 6	Low dose tamoxifen
Section #	# of stem cells	Area of the tissue section	# of stem cells/mm2 tissue section
section 1	110	6.51	16.8971
secion 2	107	6.96	15.3736
secton 3	94	5.47	17.1846
section 4	104	6.34	16.4038
			16.4648

## Sheet: Low-E1
Expt 1	Low dose tamoxifen
Section #	# of stem cells	Area of the tissue section	# of stem cells/mm2 tissue section
section 1	99	6.12	16.1765
secion 2	112	7	16
secton 3	93	6.88	13.5174
section 4	104	7	14.8571
			15.1378
