# Supplementary material for: Heterogeneous levels of delta-like 4 within a multinucleated niche cell maintains muscle stem cell diversity
Source: eLife. 2022 Dec 30;11:e68180. doi: 10.7554/eLife.68180 (PMC9803355; doi:10.7554/eLife.68180)
Supplement: Figure 4—source data 2. [file elife-68180-fig4-data2.xlsx]

## Sheet: Sheet1
Control	Regular Dose Tamoxifen			MF-Dll4fl/fl	Low Dose Tamoxifen			MF-Dll4fl/fl	Regular Dose Tamoxifen
	Dll4 intensity in Fibers	Pax7 intensity in SCs			Dll4 intensity in Fibers	Pax7 intensity in SCs			Dll4 intensity in Fibers	Pax7 intensity in SCs
	732.791	1242.85			62.081	142.2			258.791	193.53
	2051.18	1690.63			826.711	928.84			329.501	497.31
	963.971	690.71			1068.23	659.25			105.871	196.61
	839.031	843.54			286.351	523.7			0	185.67
	2135.48	1682.13			164.501	617.01			123.521	331.61
	730.181	605.98			380.221	809.16			39.891	107.78
	1320.7	1034.3			454.741	630.9			83.981	124.48
	1383.83	974.81			710.651	767.14			13.491	45.91
	1761.03	1708.86			313.711	572.38			0	129.06
	1085.88	1254.67			142.921	212.02			0	49.2
	1152.77	658.97			80.961	160.96			0	87.44
	1555.21	1035.17			703.231	350.68			0	61.19
	789.601	617.03			147.441	74.87			0	74.91
	930.071	921.98			373.101	503.21			0	6.35
	1046.78	1558.67			693.381	534.02			0	52.65
	1013.34	1258.11			537.541	691.75			259.271	441.93
	930.561	1320.97			186.681	530.01			24.561	49.48
	424.281	385.15			226.091	531.07			0	8.07
	554.961	859.8			600.851	647.78			0	93.68
	610.631	643.39			234.791	486.95			216.101	196.31
	1113.22	827.98			37.261	162.69			418.291	200.6
	921.991	343.9			495.301	536.13			375.141	298.42
	1031.05	701.98			416.971	645.44			266.391	231.87
	845.121	797.55			314.181	107.93			344.511	374.32
	760.251	527.73			343.471	526.41			342.981	379.8
	1143.41	992.03			576.671	879.67			103.101	142.53
	1319.26	1441.38			268.131	504.62			0	238.33
	1197.04	1294.65			293.831	577.03			0	377.21
	1809.22	1486.8			81.611	335.08			193.761	251.1
	1503.9	1284.44			284.461	434.1			4.071	44.52
	1625.27	1428.61			453.811	675.84			287.581	205.85
	626.191	1547.36			171.081	535.41			351.791	417.19
	1010.19	1245.46			274.891	572.01			0	410.65
	893.961	953.83			25.371	108.24			110.851	201.09
	1286.29	1555.61			804.971	600.84			341.021	264.51
	380.151	600.89			364.481	811.99			195.121	121.04
	543.741	1045.56			326.461	304.07			203.721	214.11
	305.891	997.58			441.291	593.83			386.381	185.18
	234.991	775.44			337.881	619.52			60.501	278.44
	446.021	1305.51			357.341	486.26			279.611	223.73
	787.611	944.22			666.191	489.42			357.951	288.92
	893.061	1136.93			461.581	303			0	401.71
	1519.68	1827.36			767.531	1061.93			0	384.14
	1625.72	1336.9			1049.9	665.42			201.521	327.18
	1106.8	1122.97			966.761	762.65			201.081	198.02
	1233.42	1306.31			0	27.3			0	81.06
	1415.76	732.2			714.591	505.65			0	295.56
	1325.09	1065.5			0	4.34			525.98	440.14
	1245.51	1457.26			0	0			624.52	480.49
	892.981	1014.73			512.511	547.64			467.53	441.52
	1288.53	1283.53			1098.47	1182.94			395.36	383.9
	546.561	1427.06			802.031	582.43			422.06	439.6
	964.981	1527.47			957.391	1010.58			380.77	289.78
	692.011	926.11			489.831	533.29			523.92	230.16
	635.051	584.63			587.301	789.06			537.64	478.38
	979.011	1239.84			178.091	10.43			200.25	113.72
	372.821	679.45			480.221	269.43			423.3	137.62
	1146.82	736.8			121.561	90.44			516.87	253.63
	1119.29	1107.29			973.291	541.65			476.83	173.16
	1326.97	1112.83			875.241	370.49			441.13	289.95
	1371.53	1001.49			765.781	823.18			262.72	426.23
	1815.13	1902.93			860.731	863.94			302.58	313.08
	573.011	749.02			1003.65	993.48			386.84	259.85
	772.781	1078.27			901.181	471.61			186.53	432.31
	396.281	959.94			869.411	946.18			219.5	275.71
	731.791	953.74			835.771	753.03			413.401	208.19
	1146.64	630.85			844.791	732			329.031	373.1
	618.081	1026.17			675.731	723.71			304.641	239.92
	705.951	1574.32			772.071	547.08			504.961	446.81
	739.261	579.21			754.511	751.25			498.695	305.26
	522.361	1125.66			830.591	541.75			262.855	438.31
	528.191	1254.33			746.381	271.08			443.395	418.08
	642.611	720.88			769.741	770.31			391.008	474.27
	231.001	736.01			593.931	226.72			337.018	477.85
	249.081	253.91			612.041	208.39			462.568	309.91
	179.751	404.13			961.411	878.29			294.038	403.65
	658.941	376.77			699.631	661.07			376.248	387.21
	347.891	83.97			737.141	535.37			411.864	287.29
	0	58.365			491.741	528.57			280.134	393.16
	454.201	506.83			238.311	221.61			122.304	394.69
	0	56.124			614.511	254.32			173.934	385.36
	110.441	506.32			548.121	490.5			204.654	479.48
	226.631	381.34			627.831	404.13			296.098	446.92
	217.891	449.23			483.351	592.28			342.508	443.22
	503.881	401.45			106.971	141.04			412.578	216.78
	293.681	258.31			264.891	641.35			487.893	128.81
	440.581	266.49							401.333	392.6
	408.751	328.92							456.083	370.51
	439.811	311.2							339.893	249.03
	460.221	639.56							385.313	343.55
	344.731	390.03							238.013	339.26
	750.551	526.09							218.133	431.15
	466.391	560.09							460.539	416.18
	0	65.637							175.409	438.45
	366.901	521.2							360.709	412.61
	480.251	283.11							472.612	401.76
	0	386.22							267.262	451.28
	338.391	987.59							218.062	435.71
	293.381	617.48
	367.331	633.74
	915.591	934.57
	678.381	232.66
	0	69.983
	581.231	889.39
	577.861	739.33
	737.531	375.66
	547.141	417.99
	1125.6	882.85
	423.151	252.27
	360.571	426.37
	527.561	556.57
	361.631	648.87
	508.761	522.28
	853.231	866.61
	360.781	688.37
	432.501	247.58
	189.021	444.79
	264.571	595.54
	478.121	410.33
	239.411	556.47
	0	391.16
	617.081	909.02
	235.471	412.3
	224.851	403.4
	407.821	319.86
	203.501	391.71
	130.051	766.72
	329.061	104.87
	486.231	246.65
	946.221	283.23
	558.591	885.87
	951.131	601.47
	420.091	724.56
	546.171	597.45
	1164.57	1262.68
	1230.49	740.24
	514.371	300.15
	414.181	624.96
	255.471	514.78
	73.131	545.27
	25.101	432.98
	390.161	476.55
	78.071	250
	165.321	700.26
	188.201	619.17
	463.831	512.11
