# Supplementary material for: Heterogeneous levels of delta-like 4 within a multinucleated niche cell maintains muscle stem cell diversity
Source: eLife. 2022 Dec 30;11:e68180. doi: 10.7554/eLife.68180 (PMC9803355; doi:10.7554/eLife.68180)
Supplement: Figure 5—source data 1. [file elife-68180-fig5-data1.xlsx]

## Sheet: Sheet1
Block Type	96well
Chemistry	SYBR_GREEN
Experiment File Name	D:\mcre-Dll4-30d recovery-SC-033015.eds
Experiment Run End Time	Not Started
Instrument Type	steponeplus
Passive Reference	ROX
Well	Sample Name	Target Name	Cт	Cт Mean	ΔCт	ΔCт Mean	ΔΔCт	Fold Difference	Mean	Avg	SD	SD
A1	Ctrl 3	18S	24.7443	24.816
A2	Ctrl 3	18S	24.9047
A3	Ctrl 3	18S	24.7989
A7	Expt 3	18S	23.5386	23.4858
A8	Expt 3	18S	23.5006
A9	Expt 3	18S	23.4181
A10	Expt 9	18S	26.3122	26.4659
A11	Expt 9	18S	26.4341
A12	Expt 9	18S	26.6513
B1	Ctrl 3	Pax7	29.6364		4.82042	4.87636	-0.0559432	1.03954	1.00041		0.0351296
B2	Ctrl 3	Pax7	29.7339		4.91795		0.0415853	0.971587
B3	Ctrl 3	Pax7	29.7067		4.89072		0.0143579	0.990097
B7	Expt 3	Pax7	28.8929		5.40708		0.530718	0.69221	0.687221	0.730749	0.00980428	0.0582891
B8	Expt 3	Pax7	28.9272		5.44143		0.565064	0.675925
B9	Expt 3	Pax7	28.8901		5.40434		0.527976	0.693527
B10	Expt 9	Pax7	31.7325		5.26667		0.39031	0.762966	0.774277		0.106774
B11	Expt 9	Pax7	31.9122		5.44638		0.570018	0.673608
B12	Expt 9	Pax7	31.5164		5.05057		0.174205	0.886256
C1	Ctrl 3	MyoD	26.9709		2.15495	2.20494	-0.0499948	1.03526	1.00269		0.0886056
C2	Ctrl 3	MyoD	26.9228		2.10679		-0.0981515	1.0704
C3	Ctrl 3	MyoD	27.1691		2.35309		0.148146	0.902409
C7	Expt 3	MyoD	25.325		1.83917		-0.365767	1.28857	1.36063	1.46146	0.0761015	0.0831725
C8	Expt 3	MyoD	25.1644		1.67866		-0.526281	1.44021
C9	Expt 3	MyoD	25.2544		1.76865		-0.436295	1.35312
C10	Expt 9	MyoD	27.9406		1.47473		-0.730209	1.65888	1.56229		0.0902436
C11	Expt 9	MyoD	28.0405		1.57467		-0.630275	1.54786
C12	Expt 9	MyoD	28.1051		1.63922		-0.565725	1.48013
D1	Ctrl 3	Myogenin	33.9686		9.15261	9.47523	-0.322623	1.2506	1.02256		0.254625
D2	Ctrl 3	Myogenin	34.7104		9.89447		0.41924	0.747818
D3	Ctrl 3	Myogenin	34.1946		9.37861		-0.0966174	1.06926
D7	Expt 3	Myogenin	31.2995		7.8137		-1.66153	3.16351	3.37831	3.37831	0.231237	0.231237
D8	Expt 3	Myogenin	31.2176		7.73178		-1.74345	3.34835
D9	Expt 3	Myogenin	31.1038		7.61802		-1.85721	3.62306
D10	Expt 9	Myogenin	Undetermined
D11	Expt 9	Myogenin	Undetermined
D12	Expt 9	Myogenin	Undetermined
