# Supplementary material for: Heterogeneous levels of delta-like 4 within a multinucleated niche cell maintains muscle stem cell diversity
Source: eLife. 2022 Dec 30;11:e68180. doi: 10.7554/eLife.68180 (PMC9803355; doi:10.7554/eLife.68180)
Supplement: Figure 5—source data 2. [file elife-68180-fig5-data2.xlsx]

## Sheet: Ctrl5_031120
Dll4fl/fl		Ctrl 5_031120
30d after tmx
In-vitro culture of fibers in DMEM, 10% HS
% EdU incorporation @t30
Fiber #	# of Pax7+ SCs	# of EdU+ SCs	% EdU+ SCs/fiber
1	4	0	0
2	6	0	0
3	5	1	20
4	10	2	20
5	6	0	0
6	5	0	0
7	7	0	0
8	8	1	12.5
9	6	0	0
10	4	0	0
11	3	0	0
12	4	0	0
13	7	0	0
14	3	0	0
15	2	0	0
16	4	0	0
17	7	1	14.2857
18	7	0	0
19	5	0	0
20	8	0	0
21	4	0	0
22	4	0	0
23	4	0	0
24	10	0	0
25	5	0	0
26	4	0	0
27	5	0	0
28	1	0	0
29	3	1	33.3333
30	3	0	0
Total	154	6	3.8961

## Sheet: Expt3_031120
Muscle Cre- Dll4fl/fl		Expt 3_031120
30d after tmx
In-vitro culture of fibers in DMEM, 10% HS
% EdU incorporation @t30
Fiber #	# of Pax7+ SCs	# of EdU+ SCs	% EdU+ SCs/fiber
1	4	0	0
2	2	0	0
3	4	1	25
4	10	3	30
5	7	1	14.2857
6	3	0	0
7	5	1	20
8	3	0	0
9	7	1	14.2857
10	5	0	0
11	6	2	33.3333
12	1	0	0
13	9	2	22.2222
14	3	0	0
15	4	1	25
16	1	0	0
17	4	0	0
18	3	0	0
19	4	0	0
20	4	1	25
21	4	1	25
22	4	0	0
23	3	1	33.3333
24	2	0	0
25	4	1	25
26	5	0	0
27	3	0	0
28	5	1	20
29	2	0	0
30	3	0	0
Total	124	17	13.7097

## Sheet: Ctrl6-1_031220
Dll4fl/fl		Ctrl6-1_031220
30d after tmx
In-vitro culture of fibers in DMEM, 10% HS
% EdU incorporation @t30
Fiber #	# of Pax7+ SCs	# of EdU+ SCs	% EdU+ SCs/fiber
1	7	0	0
2	5	0	0
3	4	0	0
4	8	1	12.5
5	5	0	0
6	4	0	0
7	6	0	0
8	4	0	0
9	14	0	0
10	5	0	0
11	9	0	0
12	9	1	11.1111
13	7	0	0
Total	87	2	2.29885

## Sheet: Expt4_031220
Muscle Cre- Dll4fl/fl		Expt 4_031220
30d after tmx
In-vitro culture of fibers in DMEM, 10% HS
% EdU incorporation @t30
Fiber #	# of Pax7+ SCs	# of EdU+ SCs	% EdU+ SCs/fiber
1	4	1	25
2	3	0	0
3	3	0	0
4	4	0	0
5	5	2	40
6	2	0	0
7	0	0	0
8	3	0	0
9	2	0	0
10	3	0	0
11	4	1	25
12	2	1	50
13	2	1	50
14	5	2	40
15	3	0	0
16	4	2	50
17	5	2	40
18	5	1	20
19	8	2	25
20	7	1	14.2857
21	6	1	16.6667
22	6	0	0
23	6	0	0
24	6	1	16.6667
25	4	1	25
26	2	0	0
27	3	0	0
28	4	2	50
29	8	2	25
Total	119	23	19.3277
