# Supplementary material for: Heterogeneous levels of delta-like 4 within a multinucleated niche cell maintains muscle stem cell diversity
Source: eLife. 2022 Dec 30;11:e68180. doi: 10.7554/eLife.68180 (PMC9803355; doi:10.7554/eLife.68180)
Supplement: Figure 5—source data 4. [file elife-68180-fig5-data4.xlsx]

## Sheet: Ctrl3_t48_MyoG
Item	Source	Myogenin (TxRed) Mean Intensity	TxRed Background intensity	Myogenin intensity- Background intensity	Corrected minus to zeros		# of stem cells	# of myoG+ SCs	% myogenin +/ fiber	Fraction of SCs marked with MyoG		Total % myogenin positive
Fiber No.1
2	Ctrl3_t48_Myogenin-003.nd2	1035.88	1006.08	29.8	29.8		3	0	0	0		11.3122
5	Ctrl3_t48_Myogenin-002.nd2	927.86	814.63	113.23	113.23
8	Ctrl3_t48_Myogenin-001.nd2	834.02	751.71	82.31	82.31
Fiber No.2
2	Ctrl3_t48_Myogenin-007.nd2	897.82	1014.36	-116.54	0		4	0	0	0
5	Ctrl3_t48_Myogenin-006.nd2	1078.73	1027.46	51.27	51.27
8	Ctrl3_t48_Myogenin-005.nd2	1064.11	942.57	121.54	121.54
11	Ctrl3_t48_Myogenin-004.nd2	954.93	990.56	-35.63	0
Fiber No.3
2	Ctrl3_t48_Myogenin-012.nd2	511.65	578.57	-66.92	0		11	0	0	0
5	Ctrl3_t48_Myogenin-012.nd2	585.05	695.41	-110.36	0
8	Ctrl3_t48_Myogenin-012.nd2	897.13	811.25	85.88	85.88
11	Ctrl3_t48_Myogenin-012.nd2	637.53	731.76	-94.23	0
14	Ctrl3_t48_Myogenin-011.nd2	836.53	783.26	53.27	53.27
17	Ctrl3_t48_Myogenin-011.nd2	633.72	872.18	-238.46	0
20	Ctrl3_t48_Myogenin-011.nd2	681.18	860.9	-179.72	0
23	Ctrl3_t48_Myogenin-011.nd2	697.15	712.08	-14.93	0
26	Ctrl3_t48_Myogenin-010.nd2	1027.8	1193.02	-165.22	0
29	Ctrl3_t48_Myogenin-009.nd2	693.89	779.11	-85.22	0
32	Ctrl3_t48_Myogenin-008.nd2	936.18	871.33	64.85	64.85
Fiber No.4
2	Ctrl3_t48_Myogenin-013.nd2	866.33	819.21	47.12	47.12		6	0	0	0
5	Ctrl3_t48_Myogenin-013.nd2	762.09	762.32	-0.23	0
8	Ctrl3_t48_Myogenin-015.nd2	1482.48	1444.09	38.39	38.39
11	Ctrl3_t48_Myogenin-015.nd2	1834.29	1817.21	17.08	17.08
14	Ctrl3_t48_Myogenin-014.nd2	1043.05	905.67	137.38	137.38
17	Ctrl3_t48_Myogenin-014.nd2	941.2	811.33	129.87	129.87
Fiber No.5
2	Ctrl3_t48_Myogenin-017.nd2	1019.59	736.44	283.15	283.15	positive	7	2	28.5714	0.285714
5	Ctrl3_t48_Myogenin-017.nd2	1025.84	724.82	301.02	301.02	positive
8	Ctrl3_t48_Myogenin-017.nd2	853.3	818.56	34.74	34.74
11	Ctrl3_t48_Myogenin-016.nd2	1010.76	975.15	35.61	35.61
14	Ctrl3_t48_Myogenin-016.nd2	904.27	802.13	102.14	102.14
17	Ctrl3_t48_Myogenin-016.nd2	959.71	895.92	63.79	63.79
20	Ctrl3_t48_Myogenin-016.nd2	957.99	873.23	84.76	84.76
Fiber No.6
2	Ctrl3_t48_Myogenin-013.nd2	860.3	790.15	70.15	70.15		6	1	16.6667	0.166667
5	Ctrl3_t48_Myogenin-013.nd2	762.5	713.69	48.81	48.81
8	Ctrl3_t48_Myogenin-015.nd2	1465.87	1332.49	133.38	133.38
11	Ctrl3_t48_Myogenin-015.nd2	1821.82	1769.78	52.04	52.04
14	Ctrl3_t48_Myogenin-014.nd2	1042.3	885.82	156.48	156.48	positive
17	Ctrl3_t48_Myogenin-014.nd2	928.18	808.95	119.23	119.23
Fiber No.7
2	Ctrl3_t48_Myogenin-025.nd2	766.61	749.58	17.03	17.03		3	0	0	0
5	Ctrl3_t48_Myogenin-023.nd2	782.54	725.63	56.91	56.91
8	Ctrl3_t48_Myogenin-024.nd2	793.82	699.96	93.86	93.86
Fiber No.8
2	Ctrl3_t48_Myogenin-028.nd2	726.24	1169.93	-443.69	0		5	0	0	0
5	Ctrl3_t48_Myogenin-028.nd2	1122.32	1567.04	-444.72	0
8	Ctrl3_t48_Myogenin-026.nd2	567.47	743.79	-176.32	0
11	Ctrl3_t48_Myogenin-026.nd2	597.09	729.63	-132.54	0
14	Ctrl3_t48_Myogenin-026.nd2	760.37	708.18	52.19	52.19
Fiber No.9
2	Ctrl3_t48_Myogenin-034.nd2	1087.89	999.92	87.97	87.97		8	1	12.5	0.125
5	Ctrl3_t48_Myogenin-033.nd2	1022.57	885.37	137.2	137.2
8	Ctrl3_t48_Myogenin-032.nd2	789.77	744.93	44.84	44.84
11	Ctrl3_t48_Myogenin-032.nd2	1188.74	970.08	218.66	218.66	positive
14	Ctrl3_t48_Myogenin-031.nd2	1061.45	962.71	98.74	98.74
17	Ctrl3_t48_Myogenin-031.nd2	640.67	796.01	-155.34	0
20	Ctrl3_t48_Myogenin-030.nd2	626.53	940.89	-314.36	0
23	Ctrl3_t48_Myogenin-030.nd2	758.69	832.3	-73.61	0
Fiber No.10
2	Ctrl3_t48_Myogenin-037.nd2	1416.23	1327.01	89.22	89.22		7	0	0	0
5	Ctrl3_t48_Myogenin-037.nd2	1277.72	1207.25	70.47	70.47
8	Ctrl3_t48_Myogenin-036.nd2	972.52	1102.14	-129.62	0
11	Ctrl3_t48_Myogenin-036.nd2	904.85	1124.82	-219.97	0
14	Ctrl3_t48_Myogenin-035.nd2	1341.23	1916.48	-575.25	0
17	Ctrl3_t48_Myogenin-035.nd2	1372.04	1569.85	-197.81	0
20	Ctrl3_t48_Myogenin-035.nd2	820.17	1712.75	-892.58	0
Fiber No.11
2	Ctrl3_t48_Myogenin-040.nd2	1419.1	1375.92	43.18	43.18		10	3	30	0.3
5	Ctrl3_t48_Myogenin-038.nd2	1513.1	1479.68	33.42	33.42
8	Ctrl3_t48_Myogenin-038.nd2	1219.89	1332.94	-113.05	0
11	Ctrl3_t48_Myogenin-038.nd2	1040.43	1078.24	-37.81	0
14	Ctrl3_t48_Myogenin-038.nd2	996.18	1081.12	-84.94	0
17	Ctrl3_t48_Myogenin-038.nd2	542.55	877.22	-334.67	0
20	Ctrl3_t48_Myogenin-038.nd2	1158.04	991.99	166.05	166.05	positive
23	Ctrl3_t48_Myogenin-038.nd2	1405.19	1051.99	353.2	353.2	positive
26	Ctrl3_t48_Myogenin-038.nd2	1252.29	1032.8	219.49	219.49	positive
29	Ctrl3_t48_Myogenin-038.nd2	1096.58	986.26	110.32	110.32
Fiber No.12
2	Ctrl3_t48_Myogenin-041.nd2	1078.56	999.2	79.36	79.36		6	0	0	0
5	Ctrl3_t48_Myogenin-043.nd2	1341.66	1677.99	-336.33	0
8	Ctrl3_t48_Myogenin-043.nd2	867.43	1316.53	-449.1	0
11	Ctrl3_t48_Myogenin-043.nd2	1541.11	1568.97	-27.86	0
14	Ctrl3_t48_Myogenin-043.nd2	1012.62	1494.4	-481.78	0
17	Ctrl3_t48_Myogenin-042.nd2	1267.85	1910.39	-642.54	0
Fiber No.13
2	Ctrl3_t48_Myogenin-044.nd2	2127.32	1495.5	631.82	631.82	positive	4	2	50	0.5
5	Ctrl3_t48_Myogenin-044.nd2	2663.87	1601.1	1062.77	1062.77	positive
8	Ctrl3_t48_Myogenin-045.nd2	1083.36	1174.34	-90.98	0
11	Ctrl3_t48_Myogenin-044.nd2	1992.43	1866.42	126.01	126.01
Fiber No.14
2	Ctrl3_t48_Myogenin-048.nd2	639.29	505.17	134.12	134.12		3	0	0	0
5	Ctrl3_t48_Myogenin-046.nd2	738.69	874.72	-136.03	0
8	Ctrl3_t48_Myogenin-047.nd2	864.51	800.92	63.59	63.59
Fiber No.15
2	Ctrl3_t48_Myogenin-051.nd2	1285.57	1168.53	117.04	117.04		4	0	0	0
5	Ctrl3_t48_Myogenin-051.nd2	1260.86	1162.33	98.53	98.53
8	Ctrl3_t48_Myogenin-050.nd2	456.14	574.36	-118.22	0
11	Ctrl3_t48_Myogenin-050.nd2	810.96	727.76	83.2	83.2
Fiber No.16
2	Ctrl3_t48_Myogenin-055.nd2	1308.78	1275.43	33.35	33.35		9	0	0	0
5	Ctrl3_t48_Myogenin-055.nd2	1654.44	1891.56	-237.12	0
8	Ctrl3_t48_Myogenin-055.nd2	1553.59	1753.36	-199.77	0
11	Ctrl3_t48_Myogenin-055.nd2	977.44	994.83	-17.39	0
14	Ctrl3_t48_Myogenin-054.nd2	1347.53	1334.38	13.15	13.15
17	Ctrl3_t48_Myogenin-054.nd2	1477.6	1419.35	58.25	58.25
20	Ctrl3_t48_Myogenin-053.nd2	972.18	999.2	-27.02	0
23	Ctrl3_t48_Myogenin-052.nd2	856.16	903.31	-47.15	0
26	Ctrl3_t48_Myogenin-052.nd2	949.27	916.66	32.61	32.61
Fiber No.17
2	Ctrl3_t48_Myogenin-056.nd2	1023.63	977.18	46.45	46.45		5	0	0	0
5	Ctrl3_t48_Myogenin-057.nd2	612.99	715.9	-102.91	0
8	Ctrl3_t48_Myogenin-057.nd2	694.22	809.21	-114.99	0
11	Ctrl3_t48_Myogenin-057.nd2	1010.12	927.81	82.31	82.31
14	Ctrl3_t48_Myogenin-057.nd2	890.47	841.93	48.54	48.54
Fiber No.18
2	Ctrl3_t48_Myogenin-060.nd2	913.21	797.81	115.4	115.4		10	0	0	0
5	Ctrl3_t48_Myogenin-060.nd2	852.34	852.34	0	0
8	Ctrl3_t48_Myogenin-060.nd2	611.43	935.05	-323.62	0
11	Ctrl3_t48_Myogenin-060.nd2	1111.94	1014.88	97.06	97.06
14	Ctrl3_t48_Myogenin-060.nd2	1097.05	960.26	136.79	136.79
17	Ctrl3_t48_Myogenin-059.nd2	432.14	633.96	-201.82	0
20	Ctrl3_t48_Myogenin-059.nd2	1020.15	959.46	60.69	60.69
23	Ctrl3_t48_Myogenin-059.nd2	592.86	785.72	-192.86	0
26	Ctrl3_t48_Myogenin-059.nd2	923.23	852.09	71.14	71.14
29	Ctrl3_t48_Myogenin-059.nd2	908.55	819.53	89.02	89.02
Fiber No.19
2	Ctrl3_t48_Myogenin-063.nd2	1559.62	1314.88	244.74	244.74	positive	6	2	33.3333	0.333333
5	Ctrl3_t48_Myogenin-062.nd2	1388.49	1253.59	134.9	134.9
8	Ctrl3_t48_Myogenin-064.nd2	957.87	1247.02	-289.15	0
11	Ctrl3_t48_Myogenin-061.nd2	638.46	963.91	-325.45	0
14	Ctrl3_t48_Myogenin-061.nd2	1479.65	1406.41	73.24	73.24
17	Ctrl3_t48_Myogenin-061.nd2	1566.86	1368.83	198.03	198.03	positive
Fiber No.20
2	Ctrl3_t48_Myogenin-067.nd2	1028.89	1002.21	26.68	26.68		4	1	25	0.25
5	Ctrl3_t48_Myogenin-066.nd2	821.56	697.95	123.61	123.61
8	Ctrl3_t48_Myogenin-065.nd2	910.17	713.42	196.75	196.75	positive
11	Ctrl3_t48_Myogenin-065.nd2	638.42	553.04	85.38	85.38
Fiber No.21
2	Ctrl3_t48_Myogenin-072.nd2	797	719.63	77.37	77.37		6	0	0	0
5	Ctrl3_t48_Myogenin-071.nd2	766.26	739.68	26.58	26.58
8	Ctrl3_t48_Myogenin-070.nd2	566.67	524.36	42.31	42.31
11	Ctrl3_t48_Myogenin-069.nd2	1254.62	1217.95	36.67	36.67
14	Ctrl3_t48_Myogenin-068.nd2	650.93	744.73	-93.8	0
17	Ctrl3_t48_Myogenin-068.nd2	619.94	623.8	-3.86	0
Fiber No.22
2	Ctrl3_t48_Myogenin-076.nd2	1696.14	1612.88	83.26	83.26		8	1	12.5	0.125
5	Ctrl3_t48_Myogenin-076.nd2	1645.51	1515.63	129.88	129.88
8	Ctrl3_t48_Myogenin-076.nd2	1493.42	1344.09	149.33	149.33
11	Ctrl3_t48_Myogenin-075.nd2	1153.69	1050.14	103.55	103.55
14	Ctrl3_t48_Myogenin-075.nd2	1114.03	1069.09	44.94	44.94
17	Ctrl3_t48_Myogenin-074.nd2	1158.85	1080.74	78.11	78.11
20	Ctrl3_t48_Myogenin-073.nd2	1263.85	1235.94	27.91	27.91
23	Ctrl3_t48_Myogenin-073.nd2	1490.43	1277.46	212.97	212.97	positive
Fiber No.23
2	Ctrl3_t48_Myogenin-080.nd2	1871.28	1739.07	132.21	132.21		7	0	0	0
5	Ctrl3_t48_Myogenin-079.nd2	1665.08	1620.73	44.35	44.35
8	Ctrl3_t48_Myogenin-079.nd2	1612.44	1547.61	64.83	64.83
11	Ctrl3_t48_Myogenin-079.nd2	1541.92	1438.9	103.02	103.02
14	Ctrl3_t48_Myogenin-079.nd2	1387.06	1407.81	-20.75	0
17	Ctrl3_t48_Myogenin-078.nd2	984.9	1032.03	-47.13	0
20	Ctrl3_t48_Myogenin-077.nd2	1789.29	1706.66	82.63	82.63
Fiber No.24
2	Ctrl3_t48_Myogenin-088.nd2	1591.07	1281.5	309.57	309.57	positive	16	4	25	0.25
5	Ctrl3_t48_Myogenin-088.nd2	1437.84	1225.13	212.71	212.71	positive
8	Ctrl3_t48_Myogenin-087.nd2	1140.12	1157.47	-17.35	0
11	Ctrl3_t48_Myogenin-087.nd2	1085.59	1019.14	66.45	66.45
14	Ctrl3_t48_Myogenin-086.nd2	1360.83	1251.9	108.93	108.93
17	Ctrl3_t48_Myogenin-085.nd2	922.89	1220.19	-297.3	0
20	Ctrl3_t48_Myogenin-084.nd2	1116.21	1057.6	58.61	58.61
23	Ctrl3_t48_Myogenin-084.nd2	904.07	894.92	9.15	9.15
26	Ctrl3_t48_Myogenin-084.nd2	2003.42	1946.78	56.64	56.64
29	Ctrl3_t48_Myogenin-083.nd2	643.68	1002.68	-359	0
32	Ctrl3_t48_Myogenin-082.nd2	1754.81	1642.03	112.78	112.78
35	Ctrl3_t48_Myogenin-082.nd2	801.99	981.56	-179.57	0
38	Ctrl3_t48_Myogenin-082.nd2	1716.38	1268.09	448.29	448.29	positive
41	Ctrl3_t48_Myogenin-082.nd2	1891.69	1315.83	575.86	575.86	positive
44	Ctrl3_t48_Myogenin-081.nd2	1585.1	1585.1	0	0
49	Ctrl3_t48_Myogenin-081.nd2	1705.99	1595.37	110.62	110.62
Fiber No.25
2	Ctrl3_t48_Myogenin-092.nd2	635.76	593.57	42.19	42.19		8	2	25	0.25
5	Ctrl3_t48_Myogenin-092.nd2	745.95	654.92	91.03	91.03
8	Ctrl3_t48_Myogenin-091.nd2	957.91	794.23	163.68	163.68	positive
11	Ctrl3_t48_Myogenin-090.nd2	1314.13	1147.17	166.96	166.96	positive
14	Ctrl3_t48_Myogenin-090.nd2	786.67	923.38	-136.71	0
17	Ctrl3_t48_Myogenin-090.nd2	990.54	867.89	122.65	122.65
20	Ctrl3_t48_Myogenin-090.nd2	944.63	843.58	101.05	101.05
23	Ctrl3_t48_Myogenin-089.nd2	1051.03	933.33	117.7	117.7
Fiber No.26
2	Ctrl3_t48_Myogenin-095.nd2	818.4	716.71	101.69	101.69		5	0	0	0
5	Ctrl3_t48_Myogenin-095.nd2	840.7	698.26	142.44	142.44
8	Ctrl3_t48_Myogenin-095.nd2	781.38	736.94	44.44	44.44
11	Ctrl3_t48_Myogenin-094.nd2	563.49	826.52	-263.03	0
14	Ctrl3_t48_Myogenin-093.nd2	856.51	850.49	6.02	6.02
Fiber No.27
2	Ctrl3_t48_Myogenin-099.nd2	979.99	885.24	94.75	94.75		11	0	0	0
5	Ctrl3_t48_Myogenin-099.nd2	980.14	877.49	102.65	102.65
8	Ctrl3_t48_Myogenin-098.nd2	633.71	748.91	-115.2	0
11	Ctrl3_t48_Myogenin-098.nd2	865.04	735.58	129.46	129.46
14	Ctrl3_t48_Myogenin-098.nd2	829.93	807.11	22.82	22.82
17	Ctrl3_t48_Myogenin-097.nd2	656.69	995.28	-338.59	0
20	Ctrl3_t48_Myogenin-097.nd2	622.06	687.05	-64.99	0
23	Ctrl3_t48_Myogenin-097.nd2	443.03	581.85	-138.82	0
26	Ctrl3_t48_Myogenin-097.nd2	778.09	700.43	77.66	77.66
29	Ctrl3_t48_Myogenin-096.nd2	1024.21	916.93	107.28	107.28
32	Ctrl3_t48_Myogenin-096.nd2	955.5	829.07	126.43	126.43
Fiber No.28
2	Ctrl3_t48_Myogenin-105.nd2	747.06	736.34	10.72	10.72		10	1	10	0.1
5	Ctrl3_t48_Myogenin-104.nd2	1039.16	909.26	129.9	129.9
8	Ctrl3_t48_Myogenin-104.nd2	1194.71	987.9	206.81	206.81	positive
11	Ctrl3_t48_Myogenin-104.nd2	1180.76	1063.26	117.5	117.5
14	Ctrl3_t48_Myogenin-104.nd2	1476.35	1515.56	-39.21	0
17	Ctrl3_t48_Myogenin-103.nd2	902.47	825.62	76.85	76.85
20	Ctrl3_t48_Myogenin-103.nd2	954.48	818.15	136.33	136.33
23	Ctrl3_t48_Myogenin-102.nd2	959.55	857.32	102.23	102.23
26	Ctrl3_t48_Myogenin-101.nd2	743.51	888.47	-144.96	0
29	Ctrl3_t48_Myogenin-101.nd2	1141.5	1059.31	82.19	82.19
Fiber No.29
2	Ctrl3_t48_Myogenin-110.nd2	461.45	569.04	-107.59	0		11	2	18.1818	0.181818
5	Ctrl3_t48_Myogenin-110.nd2	702.66	771.81	-69.15	0
8	Ctrl3_t48_Myogenin-109.nd2	825.08	770.58	54.5	54.5
11	Ctrl3_t48_Myogenin-108.nd2	792.41	696.88	95.53	95.53
16	Ctrl3_t48_Myogenin-108.nd2	729.93	551.31	178.62	178.62	positive
19	Ctrl3_t48_Myogenin-108.nd2	620.47	743.16	-122.69	0
22	Ctrl3_t48_Myogenin-107.nd2	857.32	758.06	99.26	99.26
25	Ctrl3_t48_Myogenin-107.nd2	875.32	731.85	143.47	143.47
28	Ctrl3_t48_Myogenin-107.nd2	520.53	658.04	-137.51	0
31	Ctrl3_t48_Myogenin-107.nd2	549.07	670.32	-121.25	0
34	Ctrl3_t48_Myogenin-106.nd2	975.85	773.54	202.31	202.31	positive
Fiber No.30
2	Ctrl3_t48_Myogenin-111.nd2	837.12	865.17	-28.05	0		4	2	50	0.5
5	Ctrl3_t48_Myogenin-111.nd2	590.88	823.69	-232.81	0
8	Ctrl3_t48_Myogenin-112.nd2	1147.93	987.12	160.81	160.81	positive
11	Ctrl3_t48_Myogenin-112.nd2	1105.78	842.28	263.5	263.5	positive
Fiber No.31
2	Ctrl3_t48_Myogenin-117.nd2	1114.12	985.32	128.8	128.8		14	1	7.14286	0.0714286
5	Ctrl3_t48_Myogenin-117.nd2	1027.25	881.04	146.21	146.21
8	Ctrl3_t48_Myogenin-117.nd2	1034.29	621.56	412.73	412.73	positive
11	Ctrl3_t48_Myogenin-116.nd2	869.24	752.28	116.96	116.96
14	Ctrl3_t48_Myogenin-116.nd2	1016.66	947.47	69.19	69.19
17	Ctrl3_t48_Myogenin-116.nd2	1043.1	927.05	116.05	116.05
20	Ctrl3_t48_Myogenin-115.nd2	1139.88	992.05	147.83	147.83
23	Ctrl3_t48_Myogenin-115.nd2	1133.65	988.61	145.04	145.04
26	Ctrl3_t48_Myogenin-115.nd2	661.93	757.15	-95.22	0
29	Ctrl3_t48_Myogenin-115.nd2	653.74	773.59	-119.85	0
32	Ctrl3_t48_Myogenin-114.nd2	805.03	788.85	16.18	16.18
35	Ctrl3_t48_Myogenin-114.nd2	876.2	840.83	35.37	35.37
38	Ctrl3_t48_Myogenin-114.nd2	1008.05	894.35	113.7	113.7
41	Ctrl3_t48_Myogenin-113.nd2	948.59	841.73	106.86	106.86
						Total	221	25

## Sheet: Ctrl5_t48_MyoG
Item	Source	Myogenin (TxRed) Mean Intensity	TxRed Background intensity	Myogenin intensity- Background intensity	Corrected minus to zeros		# of stem cells	# of myoG+ SCs	% myogenin +/ fiber	Fraction of SCs marked with MyoG		Total % myogenin positive
Fiber No.1
2	Ctrl5_t48_Myogenin-003.nd2	748.16	831.87	-83.71	0		5	0	0	0		8.80829
5	Ctrl5_t48_Myogenin-003.nd2	804.88	921.38	-116.5	0
8	Ctrl5_t48_Myogenin-001.nd2	560.85	778.41	-217.56	0
11	Ctrl5_t48_Myogenin-002.nd2	539.43	777.45	-238.02	0
14	Ctrl5_t48_Myogenin-002.nd2	826.28	795.16	31.12	31.12
Fiber No.2
2	Ctrl5_t48_Myogenin-007.nd2	912.31	804	108.31	108.31		7	2	28.5714	0.285714
5	Ctrl5_t48_Myogenin-007.nd2	1021.09	777.57	243.52	243.52	positive
8	Ctrl5_t48_Myogenin-006.nd2	890.55	767.67	122.88	122.88
11	Ctrl5_t48_Myogenin-006.nd2	953.63	793.96	159.67	159.67	positive
14	Ctrl5_t48_Myogenin-006.nd2	904.39	784.05	120.34	120.34
17	Ctrl5_t48_Myogenin-005.nd2	871.94	736.85	135.09	135.09
20	Ctrl5_t48_Myogenin-004.nd2	871.63	802.68	68.95	68.95
Fiber No.3
2	Ctrl5_t48_Myogenin-011.nd2	1351.84	1015.11	336.73	336.73	positive	6	1	16.6667	0.166667
5	Ctrl5_t48_Myogenin-010.nd2	851.4	788.33	63.07	63.07
8	Ctrl5_t48_Myogenin-008.nd2	1264.09	1232.11	31.98	31.98
11	Ctrl5_t48_Myogenin-008.nd2	715.22	846.07	-130.85	0
14	Ctrl5_t48_Myogenin-009.nd2	871.98	894.82	-22.84	0
17	Ctrl5_t48_Myogenin-009.nd2	681.91	715.5	-33.59	0
Fiber No.4
2	Ctrl5_t48_Myogenin-013.nd2	889.15	867.65	21.5	21.5		3	0	0	0
5	Ctrl5_t48_Myogenin-012.nd2	1251.51	1150.97	100.54	100.54
8	Ctrl5_t48_Myogenin-012.nd2	1354.35	1316.6	37.75	37.75
Fiber No.5
2	Ctrl5_t48_Myogenin-017.nd2	1243.76	1132.17	111.59	111.59		8	0	0	0
5	Ctrl5_t48_Myogenin-016.nd2	933.27	879.27	54	54
8	Ctrl5_t48_Myogenin-016.nd2	796.06	718.36	77.7	77.7
11	Ctrl5_t48_Myogenin-015.nd2	526.35	670.79	-144.44	0
14	Ctrl5_t48_Myogenin-015.nd2	520.78	667.74	-146.96	0
17	Ctrl5_t48_Myogenin-015.nd2	679.4	750	-70.6	0
20	Ctrl5_t48_Myogenin-014.nd2	455.7	563.4	-107.7	0
23	Ctrl5_t48_Myogenin-014.nd2	601.64	735.44	-133.8	0
Fiber No.6
2	Ctrl5_t48_Myogenin-021.nd2	596.13	610.18	-14.05	0		10	0	0	0
5	Ctrl5_t48_Myogenin-021.nd2	907.6	843.79	63.81	63.81
8	Ctrl5_t48_Myogenin-021.nd2	1139.7	1078.42	61.28	61.28
11	Ctrl5_t48_Myogenin-021.nd2	615.85	676.56	-60.71	0
14	Ctrl5_t48_Myogenin-021.nd2	1083.92	956.59	127.33	127.33
17	Ctrl5_t48_Myogenin-020.nd2	518.83	579.65	-60.82	0
20	Ctrl5_t48_Myogenin-020.nd2	1996.83	2318.71	-321.88	0
23	Ctrl5_t48_Myogenin-019.nd2	743.77	678.07	65.7	65.7
26	Ctrl5_t48_Myogenin-019.nd2	1096.88	1005.52	91.36	91.36
29	Ctrl5_t48_Myogenin-018.nd2	814.13	767	47.13	47.13
Fiber No.7
2	Ctrl5_t48_Myogenin-022.nd2	1079.31	1153.98	-74.67	0		1	0	0	0
Fiber No.8
2	Ctrl5_t48_Myogenin-029.nd2	941.91	856.81	85.1	85.1		9	1	11.1111	0.111111
5	Ctrl5_t48_Myogenin-029.nd2	938.06	1074.92	-136.86	0
8	Ctrl5_t48_Myogenin-027.nd2	1173.95	1018.3	155.65	155.65	positive
11	Ctrl5_t48_Myogenin-027.nd2	1176.2	1060.24	115.96	115.96
14	Ctrl5_t48_Myogenin-026.nd2	1024.11	921.65	102.46	102.46
17	Ctrl5_t48_Myogenin-025.nd2	977.81	885.96	91.85	91.85
20	Ctrl5_t48_Myogenin-024.nd2	1004.25	912.71	91.54	91.54
23	Ctrl5_t48_Myogenin-024.nd2	778.53	761.57	16.96	16.96
26	Ctrl5_t48_Myogenin-023.nd2	1071.23	978.44	92.79	92.79
Fiber No.9
2	Ctrl5_t48_Myogenin-034.nd2	1082.41	1109.35	-26.94	0		8	0	0	0
5	Ctrl5_t48_Myogenin-033.nd2	536.11	528.19	7.92	7.92
8	Ctrl5_t48_Myogenin-033.nd2	503.18	488.98	14.2	14.2
11	Ctrl5_t48_Myogenin-033.nd2	689.57	668.01	21.56	21.56
14	Ctrl5_t48_Myogenin-033.nd2	590.13	540.44	49.69	49.69
17	Ctrl5_t48_Myogenin-031.nd2	560.69	528.1	32.59	32.59
20	Ctrl5_t48_Myogenin-031.nd2	618.67	583.07	35.6	35.6
23	Ctrl5_t48_Myogenin-030.nd2	405.98	579.92	-173.94	0
Fiber No.10
2	Ctrl5_t48_Myogenin-036.nd2	1063.89	964.4	99.49	99.49		4	0	0	0
5	Ctrl5_t48_Myogenin-036.nd2	753.98	679.74	74.24	74.24
8	Ctrl5_t48_Myogenin-035.nd2	678.28	833.25	-154.97	0
11	Ctrl5_t48_Myogenin-035.nd2	721.32	628.24	93.08	93.08
Fiber No.11
							0	0	#DIV/0!	#DIV/0!
Fiber No.12
2	Ctrl5_t48_Myogenin-038.nd2	1069.02	1281.15	-212.13	0		3	1	33.3333	0.333333
5	Ctrl5_t48_Myogenin-038.nd2	1347.35	1150.08	197.27	197.27	positive
8	Ctrl5_t48_Myogenin-037.nd2	1502.82	1665.05	-162.23	0
Fiber No.13
2	Ctrl5_t48_Myogenin-040.nd2	777.42	718.82	58.6	58.6		2	0	0	0
5	Ctrl5_t48_Myogenin-039.nd2	709.52	861.3	-151.78	0
Fiber No.14
2	Ctrl5_t48_Myogenin-043.nd2	1005.51	906.95	98.56	98.56		4	2	50	0.5
5	Ctrl5_t48_Myogenin-042.nd2	1260.5	965.85	294.65	294.65	positive
8	Ctrl5_t48_Myogenin-042.nd2	1176.28	960.17	216.11	216.11	positive
11	Ctrl5_t48_Myogenin-041.nd2	1001.05	932.22	68.83	68.83
Fiber No.15
2	Ctrl5_t48_Myogenin-045.nd2	962.89	907.66	55.23	55.23		3	0	0	0
5	Ctrl5_t48_Myogenin-044.nd2	1137.91	990.4	147.51	147.51
8	Ctrl5_t48_Myogenin-044.nd2	814.1	780.1	34	34
Fiber No.16
2	Ctrl5_t48_Myogenin-048.nd2	2007.76	2052.73	-44.97	0		14	1	7.14286	0.0714286
5	Ctrl5_t48_Myogenin-048.nd2	2139.52	1947.59	191.93	191.93	positive
8	Ctrl5_t48_Myogenin-048.nd2	1584.78	2013.46	-428.68	0
11	Ctrl5_t48_Myogenin-048.nd2	812.02	1336.55	-524.53	0
14	Ctrl5_t48_Myogenin-047.nd2	1100.73	1646.93	-546.2	0
17	Ctrl5_t48_Myogenin-047.nd2	1347.12	1577.97	-230.85	0
20	Ctrl5_t48_Myogenin-047.nd2	1192.29	1256.34	-64.05	0
23	Ctrl5_t48_Myogenin-047.nd2	1416.36	1292.26	124.1	124.1
26	Ctrl5_t48_Myogenin-047.nd2	1478.11	1448.61	29.5	29.5
29	Ctrl5_t48_Myogenin-046.nd2	1220.37	1128.59	91.78	91.78
32	Ctrl5_t48_Myogenin-046.nd2	1161.37	1096.26	65.11	65.11
35	Ctrl5_t48_Myogenin-046.nd2	1141.13	1080.04	61.09	61.09
38	Ctrl5_t48_Myogenin-046.nd2	1191.92	1148.6	43.32	43.32
41	Ctrl5_t48_Myogenin-046.nd2	697.39	1087.16	-389.77	0
Fiber No.17
2	Ctrl5_t48_Myogenin-054.nd2	1681.85	1608.49	73.36	73.36		12	0	0	0
5	Ctrl5_t48_Myogenin-053.nd2	1483.83	1469.51	14.32	14.32
8	Ctrl5_t48_Myogenin-053.nd2	1377.16	1336.63	40.53	40.53
11	Ctrl5_t48_Myogenin-052.nd2	1576.25	1462.88	113.37	113.37
14	Ctrl5_t48_Myogenin-052.nd2	1618.09	1647.63	-29.54	0
17	Ctrl5_t48_Myogenin-051.nd2	1660.09	1571.74	88.35	88.35
20	Ctrl5_t48_Myogenin-051.nd2	1396.67	1523.59	-126.92	0
23	Ctrl5_t48_Myogenin-051.nd2	1085.41	1451.62	-366.21	0
26	Ctrl5_t48_Myogenin-050.nd2	1661.37	1556.6	104.77	104.77
29	Ctrl5_t48_Myogenin-049.nd2	1613.58	1519.01	94.57	94.57
32	Ctrl5_t48_Myogenin-049.nd2	1307.73	1282.07	25.66	25.66
35	Ctrl5_t48_Myogenin-049.nd2	752.81	1413.74	-660.93	0
Fiber No.18
2	Ctrl5_t48_Myogenin-056.nd2	1095.21	1210.6	-115.39	0		4	0	0	0
5	Ctrl5_t48_Myogenin-055.nd2	1092.58	1164	-71.42	0
8	Ctrl5_t48_Myogenin-055.nd2	621.21	1192.25	-571.04	0
11	Ctrl5_t48_Myogenin-055.nd2	756.95	1180.01	-423.06	0
Fiber No.19
2	Ctrl5_t48_Myogenin-061.nd2	855.08	802.3	52.78	52.78		10	0	0	0
5	Ctrl5_t48_Myogenin-060.nd2	518.11	532.87	-14.76	0
8	Ctrl5_t48_Myogenin-060.nd2	960.42	870.62	89.8	89.8
11	Ctrl5_t48_Myogenin-060.nd2	728.83	618.03	110.8	110.8
14	Ctrl5_t48_Myogenin-060.nd2	1007.55	999.84	7.71	7.71
17	Ctrl5_t48_Myogenin-059.nd2	1289.19	1230.45	58.74	58.74
20	Ctrl5_t48_Myogenin-059.nd2	1201.79	1072.44	129.35	129.35
23	Ctrl5_t48_Myogenin-058.nd2	634.55	886.39	-251.84	0
26	Ctrl5_t48_Myogenin-058.nd2	701.4	957.9	-256.5	0
29	Ctrl5_t48_Myogenin-057.nd2	683.79	776.89	-93.1	0
Fiber No.20
2	Ctrl5_t48_Myogenin-062.nd2	1797.78	1962.53	-164.75	0		1	0	0	0
Fiber No.21
2	Ctrl5_t48_Myogenin-064.nd2	1118.82	986.55	132.27	132.27		4	1	25	0.25
5	Ctrl5_t48_Myogenin-063.nd2	1300.09	1328.01	-27.92	0
8	Ctrl5_t48_Myogenin-063.nd2	1474.09	1443.37	30.72	30.72
11	Ctrl5_t48_Myogenin-063.nd2	1696.43	1520.8	175.63	175.63	positive
Fiber No.22
2	Ctrl5_t48_Myogenin-068.nd2	988.98	948.6	40.38	40.38		12	2	16.6667	0.166667
5	Ctrl5_t48_Myogenin-068.nd2	1419.24	1334.87	84.37	84.37
8	Ctrl5_t48_Myogenin-067.nd2	1211.44	1226.69	-15.25	0
11	Ctrl5_t48_Myogenin-067.nd2	1738.68	1528.38	210.3	210.3	positive
14	Ctrl5_t48_Myogenin-067.nd2	1075.01	980.65	94.36	94.36
17	Ctrl5_t48_Myogenin-067.nd2	851.81	908.53	-56.72	0
20	Ctrl5_t48_Myogenin-066.nd2	938.18	644.92	293.26	293.26	positive
23	Ctrl5_t48_Myogenin-066.nd2	447.82	603.54	-155.72	0
26	Ctrl5_t48_Myogenin-066.nd2	656.61	551.79	104.82	104.82
29	Ctrl5_t48_Myogenin-066.nd2	489.4	526.1	-36.7	0
32	Ctrl5_t48_Myogenin-066.nd2	771.58	650.32	121.26	121.26
35	Ctrl5_t48_Myogenin-066.nd2	676.66	545.69	130.97	130.97
Fiber No.23
2	Ctrl5_t48_Myogenin-069.nd2	2354.01	2252.91	101.1	101.1		4	0	0	0
5	Ctrl5_t48_Myogenin-069.nd2	2971.12	3278.73	-307.61	0
8	Ctrl5_t48_Myogenin-069.nd2	3222.43	3315.8	-93.37	0
11	Ctrl5_t48_Myogenin-069.nd2	2016.72	2202.05	-185.33	0
Fiber No.24
2	Ctrl5_t48_Myogenin-072.nd2	876.19	1130.24	-254.05	0		5	0	0	0
5	Ctrl5_t48_Myogenin-071.nd2	1722.63	1703.58	19.05	19.05
8	Ctrl5_t48_Myogenin-071.nd2	1278.55	1201.38	77.17	77.17
11	Ctrl5_t48_Myogenin-070.nd2	2257.64	2312.28	-54.64	0
14	Ctrl5_t48_Myogenin-070.nd2	1544.01	1408.47	135.54	135.54
Fiber No.25
2	Ctrl5_t48_Myogenin-077.nd2	799.07	722.79	76.28	76.28		12	0	0	0
5	Ctrl5_t48_Myogenin-076.nd2	830.61	770.57	60.04	60.04
8	Ctrl5_t48_Myogenin-076.nd2	600.82	586.58	14.24	14.24
11	Ctrl5_t48_Myogenin-076.nd2	737.25	698.16	39.09	39.09
14	Ctrl5_t48_Myogenin-076.nd2	433.11	664.93	-231.82	0
17	Ctrl5_t48_Myogenin-076.nd2	522.29	686.93	-164.64	0
20	Ctrl5_t48_Myogenin-075.nd2	1055.74	1017.54	38.2	38.2
23	Ctrl5_t48_Myogenin-075.nd2	517.01	824.17	-307.16	0
26	Ctrl5_t48_Myogenin-075.nd2	605.75	800.05	-194.3	0
29	Ctrl5_t48_Myogenin-075.nd2	1090.92	1024.51	66.41	66.41
32	Ctrl5_t48_Myogenin-074.nd2	580.66	795.83	-215.17	0
35	Ctrl5_t48_Myogenin-074.nd2	961.72	954.72	7	7
Fiber No.26
2	Ctrl5_t48_Myogenin-083.nd2	707.1	647.93	59.17	59.17		11	3	27.2727	0.272727
5	Ctrl5_t48_Myogenin-082.nd2	1138.6	1344.62	-206.02	0
8	Ctrl5_t48_Myogenin-081.nd2	1191.56	1004.64	186.92	186.92	positive
11	Ctrl5_t48_Myogenin-081.nd2	1242.22	1123.63	118.59	118.59
14	Ctrl5_t48_Myogenin-081.nd2	869.76	912.54	-42.78	0
17	Ctrl5_t48_Myogenin-081.nd2	1610.41	2213.55	-603.14	0
20	Ctrl5_t48_Myogenin-079.nd2	1247.52	1019.3	228.22	228.22	positive
23	Ctrl5_t48_Myogenin-079.nd2	1254.09	1095.07	159.02	159.02	positive
26	Ctrl5_t48_Myogenin-080.nd2	816.26	857.86	-41.6	0
29	Ctrl5_t48_Myogenin-078.nd2	784.93	978.54	-193.61	0
32	Ctrl5_t48_Myogenin-078.nd2	851.05	1009.12	-158.07	0
Fiber No.27
2	Ctrl5_t48_Myogenin-086.nd2	951.32	823.13	128.19	128.19		6	1	16.6667	0.166667
5	Ctrl5_t48_Myogenin-085.nd2	1110.72	957.85	152.87	152.87	positive
8	Ctrl5_t48_Myogenin-085.nd2	1588.58	1444.26	144.32	144.32
11	Ctrl5_t48_Myogenin-085.nd2	917.9	906.23	11.67	11.67
14	Ctrl5_t48_Myogenin-084.nd2	629.54	823.27	-193.73	0
17	Ctrl5_t48_Myogenin-084.nd2	644.23	811.5	-167.27	0
Fiber No.28
2	Ctrl5_t48_Myogenin-091.nd2	927.72	836.73	90.99	90.99		8	0	0	0
5	Ctrl5_t48_Myogenin-091.nd2	705.68	655.39	50.29	50.29
8	Ctrl5_t48_Myogenin-090.nd2	815.04	773.68	41.36	41.36
11	Ctrl5_t48_Myogenin-089.nd2	867.97	824.59	43.38	43.38
14	Ctrl5_t48_Myogenin-089.nd2	569.01	921.65	-352.64	0
17	Ctrl5_t48_Myogenin-089.nd2	1152.24	1053.35	98.89	98.89
20	Ctrl5_t48_Myogenin-087.nd2	855.84	793.87	61.97	61.97
23	Ctrl5_t48_Myogenin-087.nd2	837.36	954.24	-116.88	0
Fiber No.29
2	Ctrl5_t48_Myogenin-093.nd2	848.28	785.68	62.6	62.6		3	0	0	0
5	Ctrl5_t48_Myogenin-092.nd2	951.65	1017.22	-65.57	0
8	Ctrl5_t48_Myogenin-092.nd2	809.03	812.86	-3.83	0
Fiber No.30
2	Ctrl5_t48_Myogenin-098.nd2	1060.31	926.47	133.84	133.84		14	2	14.2857	0.142857
5	Ctrl5_t48_Myogenin-097.nd2	701.18	861	-159.82	0
8	Ctrl5_t48_Myogenin-097.nd2	814.43	690.04	124.39	124.39
11	Ctrl5_t48_Myogenin-096.nd2	861	747.07	113.93	113.93
14	Ctrl5_t48_Myogenin-096.nd2	751.37	774.79	-23.42	0
17	Ctrl5_t48_Myogenin-096.nd2	1055.25	948.36	106.89	106.89
20	Ctrl5_t48_Myogenin-096.nd2	1095.77	923.56	172.21	172.21	positive
23	Ctrl5_t48_Myogenin-096.nd2	1000.92	804.68	196.24	196.24	positive
26	Ctrl5_t48_Myogenin-095.nd2	844.42	748.41	96.01	96.01
29	Ctrl5_t48_Myogenin-095.nd2	734.91	843.27	-108.36	0
32	Ctrl5_t48_Myogenin-095.nd2	857.56	748.11	109.45	109.45
35	Ctrl5_t48_Myogenin-095.nd2	939.95	868.88	71.07	71.07
38	Ctrl5_t48_Myogenin-095.nd2	758.52	898.81	-140.29	0
41	Ctrl5_t48_Myogenin-095.nd2	398.11	571.09	-172.98	0
						Total #	193	17

## Sheet: Expt1_t48_MyoG
Item	Source	Myogenin (TxRed) Mean Intensity	TxRed Background intensity	Myogenin intensity- Background intensity	Corrected minus to zeros		# of stem cells	# of myoG+ SCs	% myogenin +/ fiber	Fraction of SCs marked with MyoG		Total % myogenin positive
Fiber No.1
2	Expt1_t48_Myogenin-006.nd2	615.23	520.88	94.35	94.35		10	5	50	0.5		41.0714
5	Expt1_t48_Myogenin-006.nd2	677.35	521.75	155.6	155.6	positive
8	Expt1_t48_Myogenin-005.nd2	778.47	678.75	99.72	99.72
11	Expt1_t48_Myogenin-005.nd2	742.61	673.62	68.99	68.99
14	Expt1_t48_Myogenin-004.nd2	734.88	544.5	190.38	190.38	positive
17	Expt1_t48_Myogenin-003.nd2	1012.99	755.33	257.66	257.66	positive
20	Expt1_t48_Myogenin-003.nd2	952.83	722.3	230.53	230.53	positive
23	Expt1_t48_Myogenin-002.nd2	882.41	696.76	185.65	185.65	positive
26	Expt1_t48_Myogenin-001.nd2	850.36	722.24	128.12	128.12
29	Expt1_t48_Myogenin-001.nd2	949.22	833.15	116.07	116.07
Fiber No.2
2	Expt1_t48_Myogenin-009.nd2	606.9	701.2	-94.3	0		5	1	20	0.2
5	Expt1_t48_Myogenin-008.nd2	1349.07	1257	92.07	92.07
8	Expt1_t48_Myogenin-008.nd2	868.36	764.46	103.9	103.9
11	Expt1_t48_Myogenin-007.nd2	945.25	663.7	281.55	281.55	positive
14	Expt1_t48_Myogenin-007.nd2	854.45	722.77	131.68	131.68
Fiber No.3
2	Expt1_t48_Myogenin-013.nd2	1006.13	829.41	176.72	176.72	positive	9	5	55.5556	0.555556
5	Expt1_t48_Myogenin-012.nd2	1014.74	678.81	335.93	335.93	positive
8	Expt1_t48_Myogenin-012.nd2	901.84	804.98	96.86	96.86
11	Expt1_t48_Myogenin-011.nd2	821.87	717.02	104.85	104.85
14	Expt1_t48_Myogenin-011.nd2	1766.98	890.72	876.26	876.26	positive
17	Expt1_t48_Myogenin-011.nd2	1950.09	937.48	1012.61	1012.61	positive
20	Expt1_t48_Myogenin-010.nd2	1347.21	1248.48	98.73	98.73
23	Expt1_t48_Myogenin-010.nd2	1284.58	1236.43	48.15	48.15
26	Expt1_t48_Myogenin-010.nd2	1315.99	893.17	422.82	422.82	positive
Fiber No.4
	Expt1_t48_Myogenin-015.nd2	1502.26	1405.33	96.93	96.93		3	0	0	0
5	Expt1_t48_Myogenin-015.nd2	1458.73	1412.73	46	46
8	Expt1_t48_Myogenin-014.nd2	1350.93	1245.84	105.09	105.09
Fiber No.5
2	Expt1_t48_Myogenin-017.nd2	1244.97	894.18	350.79	350.79	positive	2	2	100	1
5	Expt1_t48_Myogenin-016.nd2	1235.49	978.64	256.85	256.85	positive
Fiber No.6
2	Expt1_t48_Myogenin-021.nd2	940.76	841.22	99.54	99.54		5	1	20	0.2
5	Expt1_t48_Myogenin-020.nd2	1052.5	1009.46	43.04	43.04
8	Expt1_t48_Myogenin-019.nd2	897.15	771.88	125.27	125.27
11	Expt1_t48_Myogenin-018.nd2	944.05	782.68	161.37	161.37	positive
14	Expt1_t48_Myogenin-018.nd2	471.26	606.91	-135.65	0
Fiber No.7
2	Expt1_t48_Myogenin-023.nd2	1186.52	967.71	218.81	218.81	positive	2	2	100	1
5	Expt1_t48_Myogenin-022.nd2	1567.96	995.95	572.01	572.01	positive
Fiber No.8
2	Expt1_t48_Myogenin-027.nd2	752.43	659.55	92.88	92.88		6	0	0	0
5	Expt1_t48_Myogenin-027.nd2	854.2	833.96	20.24	20.24
8	Expt1_t48_Myogenin-026.nd2	882.22	752.1	130.12	130.12
11	Expt1_t48_Myogenin-026.nd2	738.77	612.57	126.2	126.2
14	Expt1_t48_Myogenin-024.nd2	701.7	892.28	-190.58	0
17	Expt1_t48_Myogenin-024.nd2	949.61	813.92	135.69	135.69
Fiber No.9
2	Expt1_t48_Myogenin-031.nd2	595.48	803.05	-207.57	0		6	1	16.6667	0.166667
5	Expt1_t48_Myogenin-031.nd2	733.12	848.68	-115.56	0
8	Expt1_t48_Myogenin-030.nd2	890.74	806.53	84.21	84.21
11	Expt1_t48_Myogenin-029.nd2	728.67	674.3	54.37	54.37
14	Expt1_t48_Myogenin-029.nd2	1774.16	982.75	791.41	791.41	positive
17	Expt1_t48_Myogenin-028.nd2	1296	1550.96	-254.96	0
Fiber No.10
2	Expt1_t48_Myogenin-034.nd2	693.44	628.17	65.27	65.27		3	0	0	0
5	Expt1_t48_Myogenin-033.nd2	1284.98	1333.63	-48.65	0
8	Expt1_t48_Myogenin-032.nd2	849.76	881.34	-31.58	0
Fiber No.11
2	Expt1_t48_Myogenin-037.nd2	1498.52	1333.27	165.25	165.25	positive	7	6	85.7143	0.857143
5	Expt1_t48_Myogenin-036.nd2	1240.05	1254.03	-13.98	0
8	Expt1_t48_Myogenin-035.nd2	974.58	786.32	188.26	188.26	positive
11	Expt1_t48_Myogenin-035.nd2	1213.45	1031.42	182.03	182.03	positive
14	Expt1_t48_Myogenin-035.nd2	1447.55	1019.19	428.36	428.36	positive
17	Expt1_t48_Myogenin-035.nd2	1360.63	1063.43	297.2	297.2	positive
20	Expt1_t48_Myogenin-035.nd2	1286.29	1021.98	264.31	264.31	positive
Fiber No.12
2	Expt1_t48_Myogenin-038.nd2	1076.28	835.2	241.08	241.08	positive	1	1	100	1
Fiber No.13
2	Expt1_t48_Myogenin-041.nd2	2323.85	2272.85	51	51		10	2	20	0.2
5	Expt1_t48_Myogenin-041.nd2	2496.52	2460.86	35.66	35.66
8	Expt1_t48_Myogenin-041.nd2	1287.46	2200.06	-912.6	0
11	Expt1_t48_Myogenin-041.nd2	1141.77	2121.31	-979.54	0
14	Expt1_t48_Myogenin-041.nd2	1079.89	1486.87	-406.98	0
17	Expt1_t48_Myogenin-040.nd2	3449.7	2525.58	924.12	924.12	positive
20	Expt1_t48_Myogenin-040.nd2	3156.38	2193.35	963.03	963.03	positive
23	Expt1_t48_Myogenin-039.nd2	1485.18	1938.21	-453.03	0
26	Expt1_t48_Myogenin-039.nd2	1065.25	1574.86	-509.61	0
29	Expt1_t48_Myogenin-039.nd2	1747.81	1663.56	84.25	84.25
Fiber No.14
2	Expt1_t48_Myogenin-043.nd2	3034.18	2362	672.18	672.18	positive	3	1	33.3333	0.333333
5	Expt1_t48_Myogenin-042.nd2	870.78	812.79	57.99	57.99
8	Expt1_t48_Myogenin-042.nd2	1084.52	994.65	89.87	89.87
Fiber No.15
2	Expt1_t48_Myogenin-045.nd2	1273.87	1050.17	223.7	223.7	positive	2	1	50	0.5
5	Expt1_t48_Myogenin-044.nd2	522.75	638.61	-115.86	0
Fiber No.16
2	Expt1_t48_Myogenin-047.nd2	1124.75	877.37	247.38	247.38	positive	2	1	50	0.5
5	Expt1_t48_Myogenin-046.nd2	840.58	822.51	18.07	18.07
Fiber No.17
2	Expt1_t48_Myogenin-049.nd2	777.18	688.91	88.27	88.27		4	2	50	0.5
5	Expt1_t48_Myogenin-049.nd2	888.38	763.59	124.79	124.79
8	Expt1_t48_Myogenin-048.nd2	1084.19	892.35	191.84	191.84	positive
11	Expt1_t48_Myogenin-048.nd2	1419.69	1139.2	280.49	280.49	positive
Fiber No.18
2	Expt1_t48_Myogenin-054.nd2	526.86	644.94	-118.08	0		12	6	50	0.5
5	Expt1_t48_Myogenin-053.nd2	1023.88	911.78	112.1	112.1
8	Expt1_t48_Myogenin-053.nd2	916.85	881.17	35.68	35.68
11	Expt1_t48_Myogenin-053.nd2	1386.43	1092.24	294.19	294.19	positive
14	Expt1_t48_Myogenin-053.nd2	1217.12	933.91	283.21	283.21	positive
17	Expt1_t48_Myogenin-052.nd2	1598.21	1046.47	551.74	551.74	positive
20	Expt1_t48_Myogenin-052.nd2	1347.75	949.97	397.78	397.78	positive
23	Expt1_t48_Myogenin-051.nd2	763.71	740.18	23.53	23.53
26	Expt1_t48_Myogenin-050.nd2	1286.93	1014.57	272.36	272.36	positive
29	Expt1_t48_Myogenin-050.nd2	1162.61	923.88	238.73	238.73	positive
32	Expt1_t48_Myogenin-050.nd2	1101.48	975.49	125.99	125.99
35	Expt1_t48_Myogenin-050.nd2	679.54	719.48	-39.94	0
Fiber No.19
2	Expt1_t48_Myogenin-059.nd2	708.42	570.97	137.45	137.45		9	4	44.4444	0.444444
5	Expt1_t48_Myogenin-059.nd2	1105.01	1031.03	73.98	73.98
8	Expt1_t48_Myogenin-059.nd2	520.18	523.71	-3.53	0
11	Expt1_t48_Myogenin-058.nd2	877.51	698.07	179.44	179.44	positive
14	Expt1_t48_Myogenin-058.nd2	872.52	752.99	119.53	119.53
17	Expt1_t48_Myogenin-057.nd2	1171.83	765.43	406.4	406.4	positive
20	Expt1_t48_Myogenin-057.nd2	1032.3	771.91	260.39	260.39	positive
23	Expt1_t48_Myogenin-056.nd2	1429.99	818.26	611.73	611.73	positive
26	Expt1_t48_Myogenin-055.nd2	569.09	576.89	-7.8	0
Fiber No.20
2	Expt1_t48_Myogenin-060.nd2	698.8	628.16	70.64	70.64		2	0	0	0
5	Expt1_t48_Myogenin-060.nd2	518.01	551.8	-33.79	0
Fiber No.21
2	Expt1_t48_Myogenin-065.nd2	821.43	706.14	115.29	115.29		7	4	57.1429	0.571429
5	Expt1_t48_Myogenin-065.nd2	877.35	679.62	197.73	197.73	positive
8	Expt1_t48_Myogenin-064.nd2	1099.71	710.83	388.88	388.88	positive
11	Expt1_t48_Myogenin-064.nd2	1006.44	710.13	296.31	296.31	positive
14	Expt1_t48_Myogenin-063.nd2	742.27	650.57	91.7	91.7
17	Expt1_t48_Myogenin-062.nd2	1197.98	714.77	483.21	483.21	positive
20	Expt1_t48_Myogenin-061.nd2	640.27	703.8	-63.53	0
Fiber No.22
2	Expt1_t48_Myogenin-068.nd2	1610.96	1653.49	-42.53	0		6	0	0	0
5	Expt1_t48_Myogenin-067.nd2	1160.01	1270.85	-110.84	0
8	Expt1_t48_Myogenin-067.nd2	833.4	1188.47	-355.07	0
11	Expt1_t48_Myogenin-066.nd2	680.62	549.13	131.49	131.49
14	Expt1_t48_Myogenin-066.nd2	1113.19	1029.12	84.07	84.07
17	Expt1_t48_Myogenin-066.nd2	512.91	608.64	-95.73	0
Fiber No.23
2	Expt1_t48_Myogenin-072.nd2	1156.77	905.37	251.4	251.4	positive	9	6	66.6667	0.666667
5	Expt1_t48_Myogenin-072.nd2	1314.12	1226.88	87.24	87.24
8	Expt1_t48_Myogenin-072.nd2	1278.14	1167.27	110.87	110.87
11	Expt1_t48_Myogenin-072.nd2	1105.82	913.44	192.38	192.38	positive
14	Expt1_t48_Myogenin-072.nd2	1097.52	932.76	164.76	164.76	positive
17	Expt1_t48_Myogenin-071.nd2	1145.01	946.64	198.37	198.37	positive
20	Expt1_t48_Myogenin-070.nd2	1190.75	995.01	195.74	195.74	positive
23	Expt1_t48_Myogenin-070.nd2	1128.74	951.88	176.86	176.86	positive
26	Expt1_t48_Myogenin-069.nd2	962.89	827.54	135.35	135.35
Fiber No.24
2	Expt1_t48_Myogenin-073.nd2	945.55	886.89	58.66	58.66		1	0	0	0
Fiber No.25
2	Expt1_t48_Myogenin-077.nd2	1433.11	1448.42	-15.31	0		5	4	80	0.8
5	Expt1_t48_Myogenin-076.nd2	2388.04	2061.72	326.32	326.32	positive
8	Expt1_t48_Myogenin-075.nd2	1308.65	1067.94	240.71	240.71	positive
11	Expt1_t48_Myogenin-074.nd2	1204.01	824.54	379.47	379.47	positive
14	Expt1_t48_Myogenin-074.nd2	1397.5	786.55	610.95	610.95	positive
Fiber No.26
2	Expt1_t48_Myogenin-081.nd2	702.42	650.11	52.31	52.31		6	1	16.6667	0.166667
5	Expt1_t48_Myogenin-080.nd2	970.45	851.57	118.88	118.88
8	Expt1_t48_Myogenin-079.nd2	1189.89	819.94	369.95	369.95	positive
11	Expt1_t48_Myogenin-078.nd2	1279.47	1301.13	-21.66	0
14	Expt1_t48_Myogenin-078.nd2	799.43	682.48	116.95	116.95
17	Expt1_t48_Myogenin-078.nd2	808.12	729.1	79.02	79.02
Fiber No.27
2	Expt1_t48_Myogenin-086.nd2	859.75	769.48	90.27	90.27		9	2	22.2222	0.222222
5	Expt1_t48_Myogenin-086.nd2	867.79	745.82	121.97	121.97
8	Expt1_t48_Myogenin-085.nd2	980.65	833.65	147	147
11	Expt1_t48_Myogenin-085.nd2	1222.5	1105.67	116.83	116.83
14	Expt1_t48_Myogenin-084.nd2	902.47	783.87	118.6	118.6
17	Expt1_t48_Myogenin-083.nd2	1185.75	1051.8	133.95	133.95
20	Expt1_t48_Myogenin-082.nd2	893.28	726.24	167.04	167.04	positive
23	Expt1_t48_Myogenin-082.nd2	926.85	715.68	211.17	211.17	positive
26	Expt1_t48_Myogenin-082.nd2	590.9	510.16	80.74	80.74
Fiber No.28
2	Expt1_t48_Myogenin-089.nd2	1011.09	899.53	111.56	111.56		6	2	33.3333	0.333333
5	Expt1_t48_Myogenin-089.nd2	651.81	628.41	23.4	23.4
2	Expt1_t48_Myogenin-088.nd2	1224.98	964.69	260.29	260.29	positive
5	Expt1_t48_Myogenin-088.nd2	1231.85	884.02	347.83	347.83	positive
13	Expt1_t48_Myogenin-087.nd2	842.99	806.72	36.27	36.27
16	Expt1_t48_Myogenin-087.nd2	607.94	569.64	38.3	38.3
Fiber No.29
2	Expt1_t48_Myogenin-093.nd2	820.88	721.67	99.21	99.21		6	4	66.6667	0.666667
5	Expt1_t48_Myogenin-093.nd2	1015.11	957.39	57.72	57.72
8	Expt1_t48_Myogenin-091.nd2	1738.92	1119.97	618.95	618.95	positive
11	Expt1_t48_Myogenin-091.nd2	1958.47	1014.4	944.07	944.07	positive
14	Expt1_t48_Myogenin-091.nd2	994.27	730.4	263.87	263.87	positive
17	Expt1_t48_Myogenin-090.nd2	1155.15	972.37	182.78	182.78	positive
Fiber No.30
2	Expt1_t48_Myogenin-098.nd2	1003.06	811.18	191.88	191.88	positive	6	3	50	0.5
5	Expt1_t48_Myogenin-097.nd2	1161.09	837.92	323.17	323.17	positive
8	Expt1_t48_Myogenin-096.nd2	921.16	809.28	111.88	111.88
11	Expt1_t48_Myogenin-095.nd2	784.31	693.3	91.01	91.01
14	Expt1_t48_Myogenin-095.nd2	790.08	667.9	122.18	122.18
17	Expt1_t48_Myogenin-094.nd2	1165.17	998.47	166.7	166.7	positive
Fiber No.31
2	Expt1_t48_Myogenin-101.nd2	888.1	786.21	101.89	101.89		4	2	50	0.5
5	Expt1_t48_Myogenin-100.nd2	778.86	671.1	107.76	107.76
8	Expt1_t48_Myogenin-099.nd2	1050.54	785.32	265.22	265.22	positive
11	Expt1_t48_Myogenin-099.nd2	1179.33	812.49	366.84	366.84	positive
						Total	168	69

## Sheet: Expt2_t48_MyoG
Item	Source	Myogenin (TxRed) Mean Intensity	TxRed Background intensity	Myogenin intensity- Background intensity	Corrected minus to zeros		# of stem cells	# of myoG+ SCs	% myogenin +/ fiber	Fraction of SCs marked with MyoG		Total % myogenin positive
Fiber No.1
2	Expt2_t48_Myogenin-002.nd2	1568.88	1512.62	56.26	56.26		2	0	0	0		20.3252
5	Expt2_t48_Myogenin-001.nd2	783.94	1266.25	-482.31	0
Fiber No.2
2	Expt2_t48_Myogenin-003.nd2	619.19	968.79	-349.6	0		1	0	0	0
Fiber No.3
2	Expt2_t48_Myogenin-004.nd2	1041.36	913.47	127.89	127.89		1	0	0	0
Fiber No.4
2	Expt2_t48_Myogenin-005.nd2	1809.12	1986.92	-177.8	0		4	1	25	0.25
5	Expt2_t48_Myogenin-006.nd2	1001.1	1326.81	-325.71	0
8	Expt2_t48_Myogenin-006.nd2	1527.96	1480.43	47.53	47.53
11	Expt2_t48_Myogenin-006.nd2	2502.91	1904.11	598.8	598.8	positive
Fiber No.5
2	Expt2_t48_Myogenin-007.nd2	1292.61	994.76	297.85	297.85	positive	6	3	50	0.5
5	Expt2_t48_Myogenin-007.nd2	1367.04	1080.94	286.1	286.1	positive
8	Expt2_t48_Myogenin-009.nd2	1009.83	883.98	125.85	125.85
11	Expt2_t48_Myogenin-009.nd2	831.17	773.65	57.52	57.52
14	Expt2_t48_Myogenin-008.nd2	1086.63	1090.7	-4.07	0
17	Expt2_t48_Myogenin-008.nd2	1152.49	965.27	187.22	187.22	positive
Fiber No.6
2	Expt2_t48_Myogenin-011.nd2	1007.17	1116.31	-109.14	0		9	1	11.1111	0.111111
5	Expt2_t48_Myogenin-011.nd2	1524.23	1294.31	229.92	229.92	positive
8	Expt2_t48_Myogenin-010.nd2	786.41	1144.2	-357.79	0
11	Expt2_t48_Myogenin-010.nd2	679.55	1126.4	-446.85	0
14	Expt2_t48_Myogenin-012.nd2	1376.6	1419.28	-42.68	0
17	Expt2_t48_Myogenin-013.nd2	1347.69	1208.87	138.82	138.82
20	Expt2_t48_Myogenin-013.nd2	1241.19	1337.12	-95.93	0
23	Expt2_t48_Myogenin-013.nd2	1347.83	1365.98	-18.15	0
26	Expt2_t48_Myogenin-013.nd2	1186.67	1358.77	-172.1	0
Fiber No.7
2	Expt2_t48_Myogenin-016.nd2	1028.81	984.66	44.15	44.15		4	0	0	0
5	Expt2_t48_Myogenin-016.nd2	792.95	845.95	-53	0
8	Expt2_t48_Myogenin-015.nd2	1217.4	1178.04	39.36	39.36
11	Expt2_t48_Myogenin-014.nd2	1789.35	1648.86	140.49	140.49
Fiber No.8
2	Expt2_t48_Myogenin-019.nd2	1391.4	1187.76	203.64	203.64	positive	3	1	33.3333	0.333333
5	Expt2_t48_Myogenin-017.nd2	1178.48	1571.57	-393.09	0
8	Expt2_t48_Myogenin-018.nd2	1430.32	1427.67	2.65	2.65
Fiber No.9
2	Expt2_t48_Myogenin-020.nd2	826.86	732.38	94.48	94.48		2	0	0	0
5	Expt2_t48_Myogenin-021.nd2	777.76	741.95	35.81	35.81
Fiber No.10
2	Expt2_t48_Myogenin-027.nd2	764.2	700.77	63.43	63.43		12	3	25	0.25
5	Expt2_t48_Myogenin-026.nd2	960.23	842.6	117.63	117.63
8	Expt2_t48_Myogenin-026.nd2	966.08	869.54	96.54	96.54
11	Expt2_t48_Myogenin-026.nd2	976.86	829.7	147.16	147.16
14	Expt2_t48_Myogenin-026.nd2	967.81	825.56	142.25	142.25
17	Expt2_t48_Myogenin-025.nd2	847.41	760.7	86.71	86.71
20	Expt2_t48_Myogenin-025.nd2	914.26	852.73	61.53	61.53
23	Expt2_t48_Myogenin-022.nd2	686.65	780.86	-94.21	0
26	Expt2_t48_Myogenin-023.nd2	1054.96	757.41	297.55	297.55	positive
29	Expt2_t48_Myogenin-023.nd2	1171.93	977.26	194.67	194.67	positive
32	Expt2_t48_Myogenin-023.nd2	1147.4	1007.91	139.49	139.49
35	Expt2_t48_Myogenin-023.nd2	1102.65	860.61	242.04	242.04	positive
Fiber No.11
							0	0	#DIV/0!	#DIV/0!
Fiber No.12
2	Expt2_t48_Myogenin-028.nd2	1349.99	1013.53	336.46	336.46	positive	5	1	20	0.2
5	Expt2_t48_Myogenin-028.nd2	1844.05	1724.06	119.99	119.99
8	Expt2_t48_Myogenin-028.nd2	985.67	930.12	55.55	55.55
11	Expt2_t48_Myogenin-029.nd2	1788.55	1681.8	106.75	106.75
14	Expt2_t48_Myogenin-029.nd2	1030.5	919.86	110.64	110.64
Fiber No.13
2	Expt2_t48_Myogenin-032.nd2	1128.55	1053.69	74.86	74.86		9	1	11.1111	0.111111
5	Expt2_t48_Myogenin-030.nd2	1046.73	852.96	193.77	193.77	positive
8	Expt2_t48_Myogenin-030.nd2	747.22	899.49	-152.27	0
11	Expt2_t48_Myogenin-031.nd2	881.6	884.61	-3.01	0
14	Expt2_t48_Myogenin-033.nd2	1433.2	1672.06	-238.86	0
17	Expt2_t48_Myogenin-033.nd2	1474.66	1688.75	-214.09	0
20	Expt2_t48_Myogenin-033.nd2	1299.31	1398.67	-99.36	0
23	Expt2_t48_Myogenin-033.nd2	962.36	827.7	134.66	134.66
26	Expt2_t48_Myogenin-033.nd2	1093.24	1072.85	20.39	20.39
Fiber No.14
2	Expt2_t48_Myogenin-036.nd2	916.77	1232.01	-315.24	0		3	0	0	0
5	Expt2_t48_Myogenin-035.nd2	1054.77	1369.43	-314.66	0
8	Expt2_t48_Myogenin-035.nd2	1625.49	1548.66	76.83	76.83
Fiber No.15
2	Expt2_t48_Myogenin-038.nd2	875.61	1335.51	-459.9	0		2	0	0	0
5	Expt2_t48_Myogenin-037.nd2	695.26	1143.09	-447.83	0
Fiber No.16
2	Expt2_t48_Myogenin-042.nd2	1491.82	1546.32	-54.5	0		6	1	16.6667	0.166667
5	Expt2_t48_Myogenin-042.nd2	1408.62	1521.77	-113.15	0
8	Expt2_t48_Myogenin-039.nd2	1141.56	1200.08	-58.52	0
11	Expt2_t48_Myogenin-039.nd2	1333.71	1359.5	-25.79	0
14	Expt2_t48_Myogenin-040.nd2	1159.98	1394.59	-234.61	0
17	Expt2_t48_Myogenin-041.nd2	2211.44	1929.64	281.8	281.8	positive
Fiber No.17
2	Expt2_t48_Myogenin-043.nd2	1971.16	1885.76	85.4	85.4		6	1	16.6667	0.166667
5	Expt2_t48_Myogenin-046.nd2	1736.32	2240.52	-504.2	0
8	Expt2_t48_Myogenin-046.nd2	2581.61	2828.58	-246.97	0
11	Expt2_t48_Myogenin-046.nd2	2844.11	2261.13	582.98	582.98	positive
14	Expt2_t48_Myogenin-045.nd2	816.98	1420.28	-603.3	0
17	Expt2_t48_Myogenin-044.nd2	650.4	1031.94	-381.54	0
Fiber No.18
2	Expt2_t48_Myogenin-047.nd2	1823.08	1660.77	162.31	162.31	positive	1	1	100	1
Fiber No.19
							0	0	#DIV/0!	#DIV/0!
Fiber No.20
2	Expt2_t48_Myogenin-048.nd2	601.79	564.13	37.66	37.66		3	0	0	0
	Expt2_t48_Myogenin-048.nd2	1401.13	1330.74	70.39	70.39
7	Expt2_t48_Myogenin-049.nd2	853.89	819.25	34.64	34.64
Fiber No.21
2	Expt2_t48_Myogenin-054.nd2	1368.98	1152.04	216.94	216.94	positive	5	1	20	0.2
5	Expt2_t48_Myogenin-053.nd2	804.29	700.79	103.5	103.5
8	Expt2_t48_Myogenin-053.nd2	774.99	685.73	89.26	89.26
11	Expt2_t48_Myogenin-052.nd2	1041.73	945.24	96.49	96.49
14	Expt2_t48_Myogenin-051.nd2	684.32	845.08	-160.76	0
Fiber No.22
2	Expt2_t48_Myogenin-055.nd2	1253.79	1059.34	194.45	194.45	positive	2	2	100	1
5	Expt2_t48_Myogenin-055.nd2	1189.28	976.59	212.69	212.69	positive
Fiber No.23
2	Expt2_t48_Myogenin-057.nd2	1270.58	1223.42	47.16	47.16		5	1	20	0.2
5	Expt2_t48_Myogenin-057.nd2	1219.19	1097.49	121.7	121.7
8	Expt2_t48_Myogenin-056.nd2	2084.74	1562.85	521.89	521.89	positive
11	Expt2_t48_Myogenin-057.nd2	1040.58	965.33	75.25	75.25
14	Expt2_t48_Myogenin-057.nd2	1243.4	1130	113.4	113.4
Fiber No.24
2	Expt2_t48_Myogenin-058.nd2	735.84	643.68	92.16	92.16		1	0	0	0
Fiber No.25
							0	0	#DIV/0!	#DIV/0!
Fiber No.26
2	Expt2_t48_Myogenin-065.nd2	921.89	1054.26	-132.37	0		11	2	18.1818	0.181818
5	Expt2_t48_Myogenin-065.nd2	1192.23	1025.16	167.07	167.07	positive
8	Expt2_t48_Myogenin-065.nd2	1004.16	1047.06	-42.9	0
11	Expt2_t48_Myogenin-064.nd2	1297.56	1110.01	187.55	187.55	positive
16	Expt2_t48_Myogenin-063.nd2	1079.23	1009.47	69.76	69.76
19	Expt2_t48_Myogenin-062.nd2	980.45	1009.83	-29.38	0
22	Expt2_t48_Myogenin-062.nd2	969.2	917.21	51.99	51.99
25	Expt2_t48_Myogenin-061.nd2	807.04	757.66	49.38	49.38
28	Expt2_t48_Myogenin-060.nd2	1140.12	1038.82	101.3	101.3
31	Expt2_t48_Myogenin-060.nd2	829.18	700.06	129.12	129.12
34	Expt2_t48_Myogenin-059.nd2	877.99	822.96	55.03	55.03
Fiber No.27
2	Expt2_t48_Myogenin-068.nd2	986.62	1560.83	-574.21	0		4	1	25	0.25
5	Expt2_t48_Myogenin-067.nd2	1536.24	1260.16	276.08	276.08	positive
8	Expt2_t48_Myogenin-066.nd2	1209.01	1298.81	-89.8	0
11	Expt2_t48_Myogenin-066.nd2	763.86	1112.84	-348.98	0
Fiber No.28
2	Expt2_t48_Myogenin-071.nd2	1144.36	1123.34	21.02	21.02		5	0	0	0
5	Expt2_t48_Myogenin-070.nd2	1090.55	1013.33	77.22	77.22
8	Expt2_t48_Myogenin-070.nd2	598.93	848.41	-249.48	0
11	Expt2_t48_Myogenin-069.nd2	1313.05	1258.68	54.37	54.37
14	Expt2_t48_Myogenin-069.nd2	874.85	876.91	-2.06	0
Fiber No.29
5	Expt2_t48_Myogenin-076.nd2	901.75	757.99	143.76	143.76		10	4	40	0.4
8	Expt2_t48_Myogenin-075.nd2	729.83	1010.64	-280.81	0
11	Expt2_t48_Myogenin-074.nd2	599.03	671.49	-72.46	0
14	Expt2_t48_Myogenin-074.nd2	810.54	705.57	104.97	104.97
17	Expt2_t48_Myogenin-073.nd2	784.72	874.53	-89.81	0
20	Expt2_t48_Myogenin-073.nd2	882.8	883.17	-0.37	0
23	Expt2_t48_Myogenin-073.nd2	833.44	688.89	144.55	144.55	positive
26	Expt2_t48_Myogenin-073.nd2	869.36	719.17	150.19	150.19	positive
29	Expt2_t48_Myogenin-072.nd2	1003.8	814.24	189.56	189.56	positive
32	Expt2_t48_Myogenin-072.nd2	998.96	815.78	183.18	183.18	positive
Fiber No.30
2	Expt2_t48_Myogenin-077.nd2	1221.47	1594.74	-373.27	0		1	0	0	0
						Total	123	25

## Sheet: Expt4_t48_MyoG
Item	Source	Myogenin (TxRed) Mean Intensity	TxRed Background intensity	Myogenin intensity- Background intensity	Corrected minus to zeros		# of stem cells	# of myoG+ SCs	% myogenin +/ fiber	Fraction of SCs marked with MyoG		Total % myogenin positive
Fiber No.1
2	Expt4_t48_Myogenin-001.nd2	1417.73	1267.27	150.46	150.46	positive	10	2	20	0.2		27.6018
5	Expt4_t48_Myogenin-002.nd2	1059.71	1375.88	-316.17	0
8	Expt4_t48_Myogenin-002.nd2	1051.67	1328.95	-277.28	0
11	Expt4_t48_Myogenin-002.nd2	1243.29	1356.13	-112.84	0
14	Expt4_t48_Myogenin-004.nd2	1314.65	1318.05	-3.4	0
17	Expt4_t48_Myogenin-003.nd2	1310.83	1489.52	-178.69	0
20	Expt4_t48_Myogenin-003.nd2	807.17	1224.17	-417	0
23	Expt4_t48_Myogenin-003.nd2	1120.93	1374.77	-253.84	0
26	Expt4_t48_Myogenin-003.nd2	1337.07	1193.6	143.47	143.47
29	Expt4_t48_Myogenin-003.nd2	1627.45	1444.26	183.19	183.19	positive
Fiber No.2
2	Expt4_t48_Myogenin-005.nd2	1347.27	1558.53	-211.26	0		10	0	0	0
5	Expt4_t48_Myogenin-005.nd2	1168.65	1524.12	-355.47	0
8	Expt4_t48_Myogenin-005.nd2	1672.9	1646.95	25.95	25.95
11	Expt4_t48_Myogenin-005.nd2	1064.48	1044.52	19.96	19.96
14	Expt4_t48_Myogenin-005.nd2	790.43	1196.93	-406.5	0
17	Expt4_t48_Myogenin-005.nd2	815.41	1176.35	-360.94	0
20	Expt4_t48_Myogenin-007.nd2	1187.43	1360.49	-173.06	0
23	Expt4_t48_Myogenin-007.nd2	1301.64	1178.06	123.58	123.58
26	Expt4_t48_Myogenin-006.nd2	904.13	1033.41	-129.28	0
29	Expt4_t48_Myogenin-006.nd2	883.08	1232.31	-349.23	0
Fiber No.3
2	Expt4_t48_Myogenin-012.nd2	1626.95	1524.4	102.55	102.55		12	0	0	0
5	Expt4_t48_Myogenin-011.nd2	951.36	1341.94	-390.58	0
8	Expt4_t48_Myogenin-011.nd2	1411.89	1327.69	84.2	84.2
11	Expt4_t48_Myogenin-011.nd2	1424.44	1382.34	42.1	42.1
14	Expt4_t48_Myogenin-010.nd2	1245.43	1264.91	-19.48	0
17	Expt4_t48_Myogenin-010.nd2	1370.58	1433.87	-63.29	0
20	Expt4_t48_Myogenin-010.nd2	1141.77	1593.73	-451.96	0
23	Expt4_t48_Myogenin-010.nd2	1156.85	1131.61	25.24	25.24
26	Expt4_t48_Myogenin-010.nd2	1037.03	1240.98	-203.95	0
29	Expt4_t48_Myogenin-008.nd2	1501.72	1417.16	84.56	84.56
32	Expt4_t48_Myogenin-008.nd2	1796.71	1695.3	101.41	101.41
35	Expt4_t48_Myogenin-008.nd2	1742.22	1604.88	137.34	137.34
Fiber No.4
2	Expt4_t48_Myogenin-016.nd2	1753.5	1201.1	552.4	552.4	positive	8	1	12.5	0.125
5	Expt4_t48_Myogenin-016.nd2	1013.9	1024.59	-10.69	0
8	Expt4_t48_Myogenin-016.nd2	748.56	940.76	-192.2	0
11	Expt4_t48_Myogenin-015.nd2	979.24	929.45	49.79	49.79
14	Expt4_t48_Myogenin-015.nd2	952.29	955.4	-3.11	0
17	Expt4_t48_Myogenin-015.nd2	922.63	945.6	-22.97	0
20	Expt4_t48_Myogenin-014.nd2	1438.36	1356.5	81.86	81.86
23	Expt4_t48_Myogenin-014.nd2	1176.93	1082.58	94.35	94.35
Fiber No.5
2	Expt4_t48_Myogenin-017.nd2	1082.87	894.63	188.24	188.24	positive	4	2	50	0.5
5	Expt4_t48_Myogenin-019.nd2	613.79	806.06	-192.27	0
8	Expt4_t48_Myogenin-018.nd2	1123.28	878.45	244.83	244.83	positive
11	Expt4_t48_Myogenin-018.nd2	976.4	837.31	139.09	139.09
Fiber No.6
2	Expt4_t48_Myogenin-022.nd2	896.85	809.56	87.29	87.29		3	0	0	0
5	Expt4_t48_Myogenin-021.nd2	1012.64	915.09	97.55	97.55
8	Expt4_t48_Myogenin-020.nd2	968.68	864.12	104.56	104.56
Fiber No.7
2	Expt4_t48_Myogenin-027.nd2	995.64	863.6	132.04	132.04		11	3	27.2727	0.272727
5	Expt4_t48_Myogenin-027.nd2	848.73	754.52	94.21	94.21
8	Expt4_t48_Myogenin-027.nd2	1118.85	969.95	148.9	148.9
11	Expt4_t48_Myogenin-027.nd2	925.83	831.46	94.37	94.37
14	Expt4_t48_Myogenin-026.nd2	762.62	831.24	-68.62	0
17	Expt4_t48_Myogenin-025.nd2	919.65	895.87	23.78	23.78
20	Expt4_t48_Myogenin-024.nd2	1211.61	1054.19	157.42	157.42	positive
23	Expt4_t48_Myogenin-024.nd2	1286.19	1022.67	263.52	263.52	positive
26	Expt4_t48_Myogenin-024.nd2	1191.75	989.56	202.19	202.19	positive
29	Expt4_t48_Myogenin-023.nd2	929.15	954.87	-25.72	0
32	Expt4_t48_Myogenin-023.nd2	987.1	961.27	25.83	25.83
Fiber No.8
2	Expt4_t48_Myogenin-028.nd2	867.24	763.52	103.72	103.72		10	3	30	0.3
5	Expt4_t48_Myogenin-028.nd2	865.91	699.61	166.3	166.3	positive
8	Expt4_t48_Myogenin-032.nd2	913.87	851.92	61.95	61.95
11	Expt4_t48_Myogenin-032.nd2	902.11	877.22	24.89	24.89
14	Expt4_t48_Myogenin-032.nd2	1297.86	1009.96	287.9	287.9
17	Expt4_t48_Myogenin-032.nd2	1218.83	1008.91	209.92	209.92	positive
20	Expt4_t48_Myogenin-032.nd2	1388.81	1185.01	203.8	203.8	positive
23	Expt4_t48_Myogenin-031.nd2	1152.66	1060.64	92.02	92.02
26	Expt4_t48_Myogenin-030.nd2	1124.77	1311.42	-186.65	0
29	Expt4_t48_Myogenin-029.nd2	796.91	955.03	-158.12	0
Fiber No.9
2	Expt4_t48_Myogenin-034.nd2	1038.43	919.41	119.02	119.02		7	3	42.8571	0.428571
5	Expt4_t48_Myogenin-034.nd2	683.02	654.1	28.92	28.92
8	Expt4_t48_Myogenin-033.nd2	806.46	700.77	105.69	105.69
11	Expt4_t48_Myogenin-033.nd2	1201.91	1051.43	150.48	150.48	positive
14	Expt4_t48_Myogenin-033.nd2	1263.21	930.46	332.75	332.75	positive
17	Expt4_t48_Myogenin-033.nd2	1047.09	884.26	162.83	162.83	positive
20	Expt4_t48_Myogenin-033.nd2	1144.3	1036.67	107.63	107.63
Fiber No.10
2	Expt4_t48_Myogenin-036.nd2	1927.66	1757.49	170.17	170.17	positive	2	1	50	0.5
5	Expt4_t48_Myogenin-035.nd2	1480.56	1338.93	141.63	141.63
Fiber No.11
2	Expt4_t48_Myogenin-038.nd2	1527.36	1298.18	229.18	229.18	positive	3	1	33.3333	0.333333
5	Expt4_t48_Myogenin-038.nd2	1178.26	1287.95	-109.69	0
8	Expt4_t48_Myogenin-037.nd2	699.83	857.7	-157.87	0
Fiber No.12
2	Expt4_t48_Myogenin-045.nd2	1036.77	866.13	170.64	170.64	positive	17	4	23.5294	0.235294
5	Expt4_t48_Myogenin-045.nd2	1057.42	867.51	189.91	189.91	positive
8	Expt4_t48_Myogenin-044.nd2	999.87	871.52	128.35	128.35
11	Expt4_t48_Myogenin-044.nd2	1123.72	1063.64	60.08	60.08
14	Expt4_t48_Myogenin-043.nd2	1220.5	1066.41	154.09	154.09	positive
17	Expt4_t48_Myogenin-043.nd2	1189.64	1049.73	139.91	139.91
20	Expt4_t48_Myogenin-042.nd2	460.22	651.99	-191.77	0
23	Expt4_t48_Myogenin-041.nd2	1088.82	1025.98	62.84	62.84
26	Expt4_t48_Myogenin-041.nd2	1077.8	992.2	85.6	85.6
29	Expt4_t48_Myogenin-041.nd2	1129.96	1058.26	71.7	71.7
32	Expt4_t48_Myogenin-041.nd2	1143.04	1064.76	78.28	78.28
35	Expt4_t48_Myogenin-041.nd2	1095.86	996.92	98.94	98.94
38	Expt4_t48_Myogenin-040.nd2	879.39	821.2	58.19	58.19
41	Expt4_t48_Myogenin-040.nd2	618.59	656.56	-37.97	0
44	Expt4_t48_Myogenin-039.nd2	1133.26	932.02	201.24	201.24	positive
47	Expt4_t48_Myogenin-039.nd2	780.88	829.28	-48.4	0
50	Expt4_t48_Myogenin-039.nd2	627.86	850.07	-222.21	0
Fiber No.13
2	Expt4_t48_Myogenin-049.nd2	1275.16	935.28	339.88	339.88	positive	10	9	90	0.9
5	Expt4_t48_Myogenin-049.nd2	1198.42	1041.4	157.02	157.02	positive
8	Expt4_t48_Myogenin-048.nd2	1202.75	1021.03	181.72	181.72	positive
11	Expt4_t48_Myogenin-048.nd2	1191.74	1033.92	157.82	157.82	positive
14	Expt4_t48_Myogenin-048.nd2	904.39	767.14	137.25	137.25
17	Expt4_t48_Myogenin-047.nd2	1360.7	1171.58	189.12	189.12	positive
20	Expt4_t48_Myogenin-046.nd2	1555.31	1250.88	304.43	304.43	positive
23	Expt4_t48_Myogenin-046.nd2	1608.22	1269.94	338.28	338.28	positive
26	Expt4_t48_Myogenin-046.nd2	1511.35	1105.59	405.76	405.76	positive
29	Expt4_t48_Myogenin-046.nd2	1707.24	1417.8	289.44	289.44	positive
Fiber No.14
2	Expt4_t48_Myogenin-053.nd2	1158.03	1036.71	121.32	121.32		9	2	22.2222	0.222222
5	Expt4_t48_Myogenin-053.nd2	1163.91	1045.89	118.02	118.02
8	Expt4_t48_Myogenin-052.nd2	1144.17	1068.52	75.65	75.65
11	Expt4_t48_Myogenin-052.nd2	1217.25	954.87	262.38	262.38	positive
14	Expt4_t48_Myogenin-052.nd2	1331.47	1095.72	235.75	235.75	positive
17	Expt4_t48_Myogenin-051.nd2	777.89	867.58	-89.69	0
20	Expt4_t48_Myogenin-051.nd2	1011.44	992.03	19.41	19.41
23	Expt4_t48_Myogenin-051.nd2	941.38	792.03	149.35	149.35
26	Expt4_t48_Myogenin-050.nd2	1028.8	1116.22	-87.42	0
Fiber No.15
2	Expt4_t48_Myogenin-058.nd2	1852.5	2028.99	-176.49	0		6	0	0	0
5	Expt4_t48_Myogenin-057.nd2	1627.13	1525.99	101.14	101.14
8	Expt4_t48_Myogenin-057.nd2	1521.95	1541.39	-19.44	0
11	Expt4_t48_Myogenin-056.nd2	1765.77	1663.95	101.82	101.82
14	Expt4_t48_Myogenin-054.nd2	1519.37	1430.45	88.92	88.92
17	Expt4_t48_Myogenin-054.nd2	1455.8	1344.33	111.47	111.47
Fiber No.16
2	Expt4_t48_Myogenin-064.nd2	1388.01	999.61	388.4	388.4	positive	11	5	45.4545	0.454545
5	Expt4_t48_Myogenin-063.nd2	917.34	909.89	7.45	7.45
8	Expt4_t48_Myogenin-063.nd2	1191.22	917.66	273.56	273.56	positive
11	Expt4_t48_Myogenin-062.nd2	1173.35	1109.94	63.41	63.41
14	Expt4_t48_Myogenin-062.nd2	1687.36	1570.05	117.31	117.31
17	Expt4_t48_Myogenin-061.nd2	950.43	1187.73	-237.3	0
20	Expt4_t48_Myogenin-060.nd2	1380.9	1255.66	125.24	125.24
23	Expt4_t48_Myogenin-060.nd2	1222.48	1057.28	165.2	165.2	positive
26	Expt4_t48_Myogenin-060.nd2	1303.97	1148.26	155.71	155.71	positive
29	Expt4_t48_Myogenin-060.nd2	1228.59	1026.83	201.76	201.76	positive
32	Expt4_t48_Myogenin-060.nd2	1180.63	1182.57	-1.94	0
Fiber No.17
2	Expt4_t48_Myogenin-068.nd2	1115.54	1019.46	96.08	96.08		7	2	28.5714	0.285714
5	Expt4_t48_Myogenin-068.nd2	622.67	935.75	-313.08	0
8	Expt4_t48_Myogenin-067.nd2	1378.33	1184.89	193.44	193.44	positive
11	Expt4_t48_Myogenin-067.nd2	1432.25	1243.08	189.17	189.17	positive
14	Expt4_t48_Myogenin-066.nd2	1101.4	990.5	110.9	110.9
17	Expt4_t48_Myogenin-065.nd2	1134.7	1035.94	98.76	98.76
20	Expt4_t48_Myogenin-065.nd2	599.14	874.28	-275.14	0
Fiber No.18
2	Expt4_t48_Myogenin-075.nd2	705.48	794.41	-88.93	0		12	2	16.6667	0.166667
5	Expt4_t48_Myogenin-074.nd2	1074.5	972.92	101.58	101.58
8	Expt4_t48_Myogenin-074.nd2	1178.56	1109.48	69.08	69.08
11	Expt4_t48_Myogenin-074.nd2	998.45	879.79	118.66	118.66
14	Expt4_t48_Myogenin-074.nd2	1753.61	1029.39	724.22	724.22	positive
17	Expt4_t48_Myogenin-074.nd2	806.44	892.78	-86.34	0
20	Expt4_t48_Myogenin-074.nd2	721.77	1049.48	-327.71	0
23	Expt4_t48_Myogenin-074.nd2	693.48	767.79	-74.31	0
26	Expt4_t48_Myogenin-072.nd2	822.3	728.77	93.53	93.53
29	Expt4_t48_Myogenin-071.nd2	1090.45	924.76	165.69	165.69	positive
32	Expt4_t48_Myogenin-071.nd2	775.7	1062.71	-287.01	0
35	Expt4_t48_Myogenin-069.nd2	1130.7	996.65	134.05	134.05
Fiber No.19
2	Expt4_t48_Myogenin-077.nd2	1155.96	955.28	200.68	200.68	positive	4	1	25	0.25
5	Expt4_t48_Myogenin-076.nd2	926.54	871.05	55.49	55.49
8	Expt4_t48_Myogenin-076.nd2	1060.11	942.75	117.36	117.36
11	Expt4_t48_Myogenin-076.nd2	879.34	744.29	135.05	135.05
Fiber No.20
2	Expt4_t48_Myogenin-081.nd2	1679.71	1547.05	132.66	132.66		10	3	30	0.3
5	Expt4_t48_Myogenin-081.nd2	1636.15	1553.19	82.96	82.96
8	Expt4_t48_Myogenin-081.nd2	1211.94	1259.19	-47.25	0
11	Expt4_t48_Myogenin-080.nd2	752.28	993.14	-240.86	0
14	Expt4_t48_Myogenin-079.nd2	1443.53	1184.06	259.47	259.47	positive
17	Expt4_t48_Myogenin-079.nd2	1420.81	1187.67	233.14	233.14	positive
20	Expt4_t48_Myogenin-079.nd2	1428.12	1290.69	137.43	137.43
23	Expt4_t48_Myogenin-079.nd2	1410	1248.38	161.62	161.62	positive
26	Expt4_t48_Myogenin-078.nd2	955.8	987.33	-31.53	0
29	Expt4_t48_Myogenin-078.nd2	1208.65	1080.76	127.89	127.89
Fiber No.21
2	Expt4_t48_Myogenin-085.nd2	1204.06	1127.52	76.54	76.54		7	0	0	0
5	Expt4_t48_Myogenin-085.nd2	567.57	824.45	-256.88	0
8	Expt4_t48_Myogenin-084.nd2	803.01	1018.54	-215.53	0
11	Expt4_t48_Myogenin-083.nd2	767.87	878.77	-110.9	0
14	Expt4_t48_Myogenin-082.nd2	1044.25	973.38	70.87	70.87
17	Expt4_t48_Myogenin-082.nd2	604.51	894.44	-289.93	0
20	Expt4_t48_Myogenin-082.nd2	631.43	897.98	-266.55	0
Fiber No.22
2	Expt4_t48_Myogenin-091.nd2	1019.28	830.4	188.88	188.88	positive	12	8	66.6667	0.666667
5	Expt4_t48_Myogenin-091.nd2	967.39	730.2	237.19	237.19	positive
8	Expt4_t48_Myogenin-091.nd2	790.51	781.87	8.64	8.64
11	Expt4_t48_Myogenin-090.nd2	1485.12	1376.23	108.89	108.89
14	Expt4_t48_Myogenin-090.nd2	1470.4	1172.72	297.68	297.68	positive
17	Expt4_t48_Myogenin-090.nd2	1309.57	1167.29	142.28	142.28
20	Expt4_t48_Myogenin-089.nd2	785.43	720.24	65.19	65.19
23	Expt4_t48_Myogenin-088.nd2	1120	903.3	216.7	216.7	positive
26	Expt4_t48_Myogenin-087.nd2	1204.99	1030.64	174.35	174.35	positive
29	Expt4_t48_Myogenin-086.nd2	1658.15	1499.81	158.34	158.34	positive
32	Expt4_t48_Myogenin-086.nd2	1714.79	1546.05	168.74	168.74	positive
35	Expt4_t48_Myogenin-086.nd2	1727.78	1531.4	196.38	196.38	positive
Fiber No.23
2	Expt4_t48_Myogenin-095.nd2	608.38	709.44	-101.06	0		4	1	25	0.25
5	Expt4_t48_Myogenin-094.nd2	879.86	763.75	116.11	116.11
8	Expt4_t48_Myogenin-094.nd2	676.71	721.76	-45.05	0
11	Expt4_t48_Myogenin-092.nd2	1039.59	778.85	260.74	260.74	positive
Fiber No.24
2	Expt4_t48_Myogenin-099.nd2	1448.45	1376.14	72.31	72.31		5	1	20	0.2
5	Expt4_t48_Myogenin-098.nd2	1210.53	1220.58	-10.05	0
8	Expt4_t48_Myogenin-097.nd2	1032.65	974.14	58.51	58.51
11	Expt4_t48_Myogenin-096.nd2	1385.23	1197.51	187.72	187.72	positive
14	Expt4_t48_Myogenin-096.nd2	935.21	917.07	18.14	18.14
Fiber No.25
2	Expt4_t48_Myogenin-104.nd2	1567.11	1504.36	62.75	62.75		11	3	27.2727	0.272727
5	Expt4_t48_Myogenin-104.nd2	1219.45	1298.33	-78.88	0
8	Expt4_t48_Myogenin-103.nd2	1588.26	1438.82	149.44	149.44
11	Expt4_t48_Myogenin-103.nd2	1154.1	1117.99	36.11	36.11
14	Expt4_t48_Myogenin-102.nd2	1599.31	1422.02	177.29	177.29	positive
17	Expt4_t48_Myogenin-102.nd2	1640.48	1284.41	356.07	356.07	positive
20	Expt4_t48_Myogenin-102.nd2	1531.09	1282.15	248.94	248.94	positive
23	Expt4_t48_Myogenin-102.nd2	1094.47	1326.1	-231.63	0
26	Expt4_t48_Myogenin-102.nd2	1193.06	1165.65	27.41	27.41
29	Expt4_t48_Myogenin-101.nd2	1338.96	1329	9.96	9.96
32	Expt4_t48_Myogenin-101.nd2	1147.1	1230.48	-83.38	0
Fiber No.26
2	Expt4_t48_Myogenin-105.nd2	1039.24	959.41	79.83	79.83		2	0	0	0
5	Expt4_t48_Myogenin-105.nd2	981.69	925.32	56.37	56.37
Fiber No.27
2	Expt4_t48_Myogenin-108.nd2	1840.11	1632.54	207.57	207.57	positive	4	3	75	0.75
5	Expt4_t48_Myogenin-108.nd2	1919.39	1634.02	285.37	285.37	positive
8	Expt4_t48_Myogenin-108.nd2	1217.15	1094.32	122.83	122.83
11	Expt4_t48_Myogenin-106.nd2	2300.48	1402.27	898.21	898.21	positive
Fiber No.28
2	Expt4_t48_Myogenin-111.nd2	860.7	1094.27	-233.57	0		3	0	0	0
5	Expt4_t48_Myogenin-110.nd2	1571.1	1429.08	142.02	142.02
8	Expt4_t48_Myogenin-109.nd2	1340.03	1283.99	56.04	56.04
Fiber No.29
2	Expt4_t48_Myogenin-113.nd2	583.74	840.46	-256.72	0		2	1	50	0.5
5	Expt4_t48_Myogenin-112.nd2	1411.93	1219.14	192.79	192.79	positive
Fiber No.30
2	Expt4_t48_Myogenin-116.nd2	1230.37	1093.24	137.13	137.13		5	0	0	0
5	Expt4_t48_Myogenin-116.nd2	821.82	919.71	-97.89	0
8	Expt4_t48_Myogenin-115.nd2	1006.87	924.13	82.74	82.74
11	Expt4_t48_Myogenin-115.nd2	809.69	926.45	-116.76	0
14	Expt4_t48_Myogenin-114.nd2	873.22	960.69	-87.47	0
						Total	221	61

## Sheet: Expt7_t48_MyoG
Item	Source	Myogenin (TxRed) Mean Intensity	TxRed Background intensity	Myogenin intensity- Background intensity	Corrected minus to zeros		# of stem cells	# of myoG+ SCs	% myogenin +/ fiber	Fraction of SCs marked with MyoG		Total % myogenin positive
Fiber No.1
2	Expt7_t48_Myogenin-001.nd2	809.02	843.78	-34.76	0		4	2	50	0.5		22.449
5	Expt7_t48_Myogenin-003.nd2	1461.95	1156.81	305.14	305.14	positive
8	Expt7_t48_Myogenin-003.nd2	1501.43	1212.86	288.57	288.57	positive
11	Expt7_t48_Myogenin-002.nd2	1591.28	1452.07	139.21	139.21
Fiber No.2
2	Expt7_t48_Myogenin-004.nd2	2246.06	2288.49	-42.43	0		4	0	0	0
5	Expt7_t48_Myogenin-005.nd2	1672.17	1718.87	-46.7	0
8	Expt7_t48_Myogenin-005.nd2	864.62	1503.32	-638.7	0
11	Expt7_t48_Myogenin-005.nd2	1804.92	1864.56	-59.64	0
Fiber No.3
2	Expt7_t48_Myogenin-010.nd2	569.76	820.24	-250.48	0		6	0	0	0
5	Expt7_t48_Myogenin-010.nd2	804.52	780.79	23.73	23.73
8	Expt7_t48_Myogenin-009.nd2	603.74	742.67	-138.93	0
11	Expt7_t48_Myogenin-008.nd2	936.47	812.87	123.6	123.6
14	Expt7_t48_Myogenin-008.nd2	922.28	945.26	-22.98	0
17	Expt7_t48_Myogenin-007.nd2	472.37	738.75	-266.38	0
Fiber No.4
2	Expt7_t48_Myogenin-013.nd2	918.03	827.4	90.63	90.63		5	1	20	0.2
5	Expt7_t48_Myogenin-012.nd2	1933.38	2071.17	-137.79	0
8	Expt7_t48_Myogenin-012.nd2	2018.47	2091.52	-73.05	0
11	Expt7_t48_Myogenin-011.nd2	1334.69	1184.54	150.15	150.15	positive
14	Expt7_t48_Myogenin-011.nd2	1061.18	1296.08	-234.9	0
Fiber No.5
2	Expt7_t48_Myogenin-017.nd2	1145.34	859.07	286.27	286.27	positive	7	3	42.8571	0.428571
5	Expt7_t48_Myogenin-016.nd2	1097	645.47	451.53	451.53	positive
8	Expt7_t48_Myogenin-016.nd2	1144.47	846.13	298.34	298.34	positive
11	Expt7_t48_Myogenin-016.nd2	897.24	761.74	135.5	135.5
14	Expt7_t48_Myogenin-015.nd2	740.66	690.95	49.71	49.71
17	Expt7_t48_Myogenin-014.nd2	839.59	740.3	99.29	99.29
20	Expt7_t48_Myogenin-014.nd2	825.7	727.55	98.15	98.15
Fiber No.6
2	Expt7_t48_Myogenin-019.nd2	951.87	846.37	105.5	105.5		4	0	0	0
5	Expt7_t48_Myogenin-019.nd2	1012.73	948.04	64.69	64.69
8	Expt7_t48_Myogenin-018.nd2	577.4	707.05	-129.65	0
11	Expt7_t48_Myogenin-018.nd2	488.48	655.55	-167.07	0
Fiber No.7
2	Expt7_t48_Myogenin-026.nd2	1245.69	845.36	400.33	400.33	positive	15	7	46.6667	0.466667
5	Expt7_t48_Myogenin-026.nd2	1366.25	824.41	541.84	541.84	positive
8	Expt7_t48_Myogenin-026.nd2	1204.23	991.06	213.17	213.17	positive
11	Expt7_t48_Myogenin-026.nd2	1407.12	1035.37	371.75	371.75	positive
14	Expt7_t48_Myogenin-025.nd2	845.5	767.9	77.6	77.6
17	Expt7_t48_Myogenin-025.nd2	820.07	762.18	57.89	57.89
20	Expt7_t48_Myogenin-024.nd2	1597.55	976.09	621.46	621.46	positive
23	Expt7_t48_Myogenin-024.nd2	856.54	784.61	71.93	71.93
26	Expt7_t48_Myogenin-024.nd2	1260.31	890.11	370.2	370.2	positive
29	Expt7_t48_Myogenin-024.nd2	1172.12	950.79	221.33	221.33	positive
32	Expt7_t48_Myogenin-024.nd2	846.15	947.85	-101.7	0
35	Expt7_t48_Myogenin-023.nd2	850.35	1071.68	-221.33	0
38	Expt7_t48_Myogenin-020.nd2	1162.48	1060.38	102.1	102.1
41	Expt7_t48_Myogenin-020.nd2	789.31	927.43	-138.12	0
44	Expt7_t48_Myogenin-021.nd2	459.39	826.15	-366.76	0
Fiber No.8
2	Expt7_t48_Myogenin-033.nd2	829.17	761.59	67.58	67.58		11	3	27.2727	0.272727
5	Expt7_t48_Myogenin-033.nd2	883.61	782.62	100.99	100.99
8	Expt7_t48_Myogenin-032.nd2	798.21	662.38	135.83	135.83
11	Expt7_t48_Myogenin-031.nd2	1145.3	1053.69	91.61	91.61
14	Expt7_t48_Myogenin-031.nd2	1287.95	1300.78	-12.83	0
17	Expt7_t48_Myogenin-031.nd2	675.41	750.4	-74.99	0
20	Expt7_t48_Myogenin-030.nd2	1127.67	959.78	167.89	167.89	positive
23	Expt7_t48_Myogenin-029.nd2	1214.84	929.56	285.28	285.28	positive
26	Expt7_t48_Myogenin-028.nd2	1260.19	1120.93	139.26	139.26
29	Expt7_t48_Myogenin-028.nd2	1228.04	1003.59	224.45	224.45	positive
32	Expt7_t48_Myogenin-027.nd2	848.46	748.99	99.47	99.47
Fiber No.9
2	Expt7_t48_Myogenin-036.nd2	858.36	819.79	38.57	38.57		3	0	0	0
5	Expt7_t48_Myogenin-035.nd2	842.95	787.14	55.81	55.81
8	Expt7_t48_Myogenin-034.nd2	819.06	796.74	22.32	22.32
Fiber No.10
2	Expt7_t48_Myogenin-040.nd2	848.52	996.38	-147.86	0		6	0	0	0
5	Expt7_t48_Myogenin-039.nd2	781.51	683.63	97.88	97.88
8	Expt7_t48_Myogenin-038.nd2	857.82	739.1	118.72	118.72
11	Expt7_t48_Myogenin-037.nd2	762.5	676.27	86.23	86.23
14	Expt7_t48_Myogenin-037.nd2	691.45	785.71	-94.26	0
17	Expt7_t48_Myogenin-037.nd2	741.13	794.97	-53.84	0
Fiber No.11
2	Expt7_t48_Myogenin-045.nd2	1255.28	1643.02	-387.74	0		11	4	36.3636	0.363636
5	Expt7_t48_Myogenin-045.nd2	1226.61	1606.3	-379.69	0
8	Expt7_t48_Myogenin-044.nd2	1125.23	1382.9	-257.67	0
11	Expt7_t48_Myogenin-044.nd2	1300.39	1373.19	-72.8	0
14	Expt7_t48_Myogenin-043.nd2	1559.79	1495.45	64.34	64.34
17	Expt7_t48_Myogenin-043.nd2	1267.44	1104.93	162.51	162.51	positive
20	Expt7_t48_Myogenin-043.nd2	1221.96	984.15	237.81	237.81	positive
23	Expt7_t48_Myogenin-042.nd2	1667.25	1521.52	145.73	145.73
25	Expt7_t48_Myogenin-041.nd2	1311.68	1166.28	145.4	145.4
28	Expt7_t48_Myogenin-042.nd2	1682.34	1302.31	380.03	380.03	positive
31	Expt7_t48_Myogenin-042.nd2	1741.77	1494.21	247.56	247.56	positive
Fiber No.12
2	Expt7_t48_Myogenin-047.nd2	869.2	768.29	100.91	100.91		4	0	0	0
5	Expt7_t48_Myogenin-047.nd2	897.51	845.36	52.15	52.15
8	Expt7_t48_Myogenin-046.nd2	482.78	588.19	-105.41	0
11	Expt7_t48_Myogenin-046.nd2	618.8	782.33	-163.53	0
Fiber No.13
2	Expt7_t48_Myogenin-050.nd2	1017.32	1189.73	-172.41	0		8	0	0	0
5	Expt7_t48_Myogenin-050.nd2	1004.8	1138.21	-133.41	0
8	Expt7_t48_Myogenin-049.nd2	1664.94	1596.28	68.66	68.66
11	Expt7_t48_Myogenin-049.nd2	1683.61	1732.63	-49.02	0
14	Expt7_t48_Myogenin-049.nd2	1378.95	1472.58	-93.63	0
17	Expt7_t48_Myogenin-049.nd2	823.91	1135.19	-311.28	0
20	Expt7_t48_Myogenin-048.nd2	781.09	1460.91	-679.82	0
23	Expt7_t48_Myogenin-048.nd2	1136.89	1260.98	-124.09	0
Fiber No.14
2	Expt7_t48_Myogenin-052.nd2	1079.59	948.77	130.82	130.82		5	0	0	0
5	Expt7_t48_Myogenin-052.nd2	1094.74	968.88	125.86	125.86
8	Expt7_t48_Myogenin-052.nd2	967.68	851.19	116.49	116.49
11	Expt7_t48_Myogenin-052.nd2	963.94	818.1	145.84	145.84
14	Expt7_t48_Myogenin-051.nd2	973.81	892.59	81.22	81.22
Fiber No.15
2	Expt7_t48_Myogenin-055.nd2	844.91	1271.88	-426.97	0		4	1	25	0.25
5	Expt7_t48_Myogenin-054.nd2	1617.22	1465.97	151.25	151.25	positive
8	Expt7_t48_Myogenin-053.nd2	2032.11	1923.24	108.87	108.87
11	Expt7_t48_Myogenin-053.nd2	914.69	1570.3	-655.61	0
Fiber No.16
2	Expt7_t48_Myogenin-059.nd2	1476.52	1414.58	61.94	61.94		10	1	10	0.1
5	Expt7_t48_Myogenin-059.nd2	1203.71	1376.33	-172.62	0
8	Expt7_t48_Myogenin-057.nd2	1584.91	1499.64	85.27	85.27
11	Expt7_t48_Myogenin-057.nd2	1508.16	1386.06	122.1	122.1
14	Expt7_t48_Myogenin-056.nd2	1651.5	1579.11	72.39	72.39
17	Expt7_t48_Myogenin-056.nd2	1324.49	1147.89	176.6	176.6	positive
20	Expt7_t48_Myogenin-056.nd2	763.73	1084.32	-320.59	0
23	Expt7_t48_Myogenin-056.nd2	1055.13	1320.03	-264.9	0
26	Expt7_t48_Myogenin-056.nd2	1456.36	1515.54	-59.18	0
29	Expt7_t48_Myogenin-056.nd2	1099.58	997.44	102.14	102.14
Fiber No.17
2	Expt7_t48_Myogenin-062.nd2	1104.07	886.13	217.94	217.94	positive	3	1	33.3333	0.333333
5	Expt7_t48_Myogenin-061.nd2	562.88	739.42	-176.54	0
8	Expt7_t48_Myogenin-060.nd2	1159.14	1037.9	121.24	121.24
Fiber No.18
2	Expt7_t48_Myogenin-066.nd2	1941.72	2062.02	-120.3	0		4	1	25	0.25
5	Expt7_t48_Myogenin-065.nd2	1625.09	1550.89	74.2	74.2
8	Expt7_t48_Myogenin-065.nd2	954.82	911.84	42.98	42.98
11	Expt7_t48_Myogenin-063.nd2	1322.08	1170.45	151.63	151.63	positive
Fiber No.19
2	Expt7_t48_Myogenin-073.nd2	1342.59	1089.42	253.17	253.17	positive	14	3	21.4286	0.214286
5	Expt7_t48_Myogenin-072.nd2	1236.09	1049.6	186.49	186.49	positive
8	Expt7_t48_Myogenin-071.nd2	1181.79	1075.17	106.62	106.62
11	Expt7_t48_Myogenin-071.nd2	668.07	618.01	50.06	50.06
14	Expt7_t48_Myogenin-071.nd2	943.43	921.01	22.42	22.42
17	Expt7_t48_Myogenin-070.nd2	1558.75	1456.02	102.73	102.73
20	Expt7_t48_Myogenin-069.nd2	1068.09	1129.91	-61.82	0
23	Expt7_t48_Myogenin-069.nd2	778.15	863.78	-85.63	0
26	Expt7_t48_Myogenin-069.nd2	1651.64	1664.12	-12.48	0
29	Expt7_t48_Myogenin-068.nd2	1176.79	1105.58	71.21	71.21
32	Expt7_t48_Myogenin-068.nd2	968.99	1065.23	-96.24	0
35	Expt7_t48_Myogenin-068.nd2	759.47	1094.26	-334.79	0
38	Expt7_t48_Myogenin-067.nd2	1181.86	1119.83	62.03	62.03
41	Expt7_t48_Myogenin-067.nd2	1105.58	941.3	164.28	164.28	positive
Fiber No.20
2	Expt7_t48_Myogenin-075.nd2	528.2	527.74	0.46	0.46		4	1	25	0.25
5	Expt7_t48_Myogenin-074.nd2	988.61	822.86	165.75	165.75	positive
8	Expt7_t48_Myogenin-074.nd2	1045.2	915.46	129.74	129.74
11	Expt7_t48_Myogenin-074.nd2	573.28	751.1	-177.82	0
Fiber No.21
2	Expt7_t48_Myogenin-076.nd2	940.77	835.78	104.99	104.99		10	2	20	0.2
5	Expt7_t48_Myogenin-076.nd2	1244	1179.1	64.9	64.9
8	Expt7_t48_Myogenin-076.nd2	1246.87	1180.31	66.56	66.56
10	Expt7_t48_Myogenin-079.nd2	1182.4	975.73	206.67	206.67	positive
13	Expt7_t48_Myogenin-079.nd2	658.56	944.88	-286.32	0
16	Expt7_t48_Myogenin-079.nd2	1666.96	1261.27	405.69	405.69	positive
19	Expt7_t48_Myogenin-079.nd2	1154.08	1208.47	-54.39	0
22	Expt7_t48_Myogenin-078.nd2	1282.51	1217.61	64.9	64.9
25	Expt7_t48_Myogenin-077.nd2	1169.15	1248.03	-78.88	0
28	Expt7_t48_Myogenin-077.nd2	715.72	671.84	43.88	43.88
Fiber No.22
2	Expt7_t48_Myogenin-080.nd2	1213.49	1206.81	6.68	6.68		12	4	33.3333	0.333333
5	Expt7_t48_Myogenin-080.nd2	524.41	984.93	-460.52	0
8	Expt7_t48_Myogenin-080.nd2	846.42	1166.14	-319.72	0
11	Expt7_t48_Myogenin-082.nd2	1552.45	1520.51	31.94	31.94
14	Expt7_t48_Myogenin-082.nd2	1760.4	1032.25	728.15	728.15	positive
17	Expt7_t48_Myogenin-082.nd2	1847.21	1713.52	133.69	133.69
20	Expt7_t48_Myogenin-082.nd2	1693.89	1375.74	318.15	318.15	positive
23	Expt7_t48_Myogenin-082.nd2	1839.76	1542.85	296.91	296.91	positive
26	Expt7_t48_Myogenin-082.nd2	1756.4	1580.89	175.51	175.51	positive
29	Expt7_t48_Myogenin-081.nd2	1238.8	1795.49	-556.69	0
32	Expt7_t48_Myogenin-081.nd2	1301.88	1765.53	-463.65	0
35	Expt7_t48_Myogenin-081.nd2	1224.09	2156.48	-932.39	0
Fiber No.23
2	Expt7_t48_Myogenin-083.nd2	1133.07	1301.8	-168.73	0		4	0	0	0
5	Expt7_t48_Myogenin-083.nd2	1159.45	1343.08	-183.63	0
8	Expt7_t48_Myogenin-083.nd2	1101.73	1368.9	-267.17	0
11	Expt7_t48_Myogenin-084.nd2	1044.52	959.36	85.16	85.16
Fiber No.24
2	Expt7_t48_Myogenin-087.nd2	836.32	685.02	151.3	151.3	positive	4	2	50	0.5
5	Expt7_t48_Myogenin-087.nd2	721.42	703.78	17.64	17.64
8	Expt7_t48_Myogenin-086.nd2	577.2	697.72	-120.52	0
11	Expt7_t48_Myogenin-085.nd2	946.88	779.02	167.86	167.86	positive
Fiber No.25
2	Expt7_t48_Myogenin-090.nd2	819.43	755.34	64.09	64.09		5	3	60	0.6
5	Expt7_t48_Myogenin-090.nd2	903.42	770.9	132.52	132.52
8	Expt7_t48_Myogenin-089.nd2	1021.8	687.69	334.11	334.11	positive
11	Expt7_t48_Myogenin-088.nd2	1220.01	986.39	233.62	233.62	positive
14	Expt7_t48_Myogenin-088.nd2	1158.23	965.59	192.64	192.64	positive
Fiber No.26
2	Expt7_t48_Myogenin-095.nd2	1239.39	1102.63	136.76	136.76		8	1	12.5	0.125
5	Expt7_t48_Myogenin-093.nd2	1352.84	1355.19	-2.35	0
8	Expt7_t48_Myogenin-093.nd2	1004.61	991.36	13.25	13.25
11	Expt7_t48_Myogenin-093.nd2	1229.73	1104.01	125.72	125.72
14	Expt7_t48_Myogenin-094.nd2	1867.64	1720.56	147.08	147.08
17	Expt7_t48_Myogenin-092.nd2	1969.18	1353.26	615.92	615.92	positive
20	Expt7_t48_Myogenin-092.nd2	611.94	963.03	-351.09	0
23	Expt7_t48_Myogenin-092.nd2	898.33	943.24	-44.91	0
Fiber No.27
2	Expt7_t48_Myogenin-097.nd2	1438.33	1641.95	-203.62	0		2	0	0	0
5	Expt7_t48_Myogenin-096.nd2	2219.45	2883.9	-664.45	0
Fiber No.28
2	Expt7_t48_Myogenin-101.nd2	828.33	877.81	-49.48	0		6	2	33.3333	0.333333
5	Expt7_t48_Myogenin-100.nd2	484.59	619.58	-134.99	0
8	Expt7_t48_Myogenin-099.nd2	846.57	806.17	40.4	40.4
11	Expt7_t48_Myogenin-098.nd2	1127.29	878.64	248.65	248.65	positive
14	Expt7_t48_Myogenin-098.nd2	1088.47	910.89	177.58	177.58	positive
17	Expt7_t48_Myogenin-098.nd2	1016.24	913.64	102.6	102.6
Fiber No.29
2	Expt7_t48_Myogenin-103.nd2	953.29	888.01	65.28	65.28		3	1	33.3333	0.333333
5	Expt7_t48_Myogenin-103.nd2	804.43	637.94	166.49	166.49	positive
8	Expt7_t48_Myogenin-103.nd2	598.89	537.62	61.27	61.27
Fiber No.30
2	Expt7_t48_Myogenin-107.nd2	731.67	950.66	-218.99	0		6	0	0	0
5	Expt7_t48_Myogenin-107.nd2	843.41	779.28	64.13	64.13
8	Expt7_t48_Myogenin-107.nd2	784.05	764.42	19.63	19.63
11	Expt7_t48_Myogenin-106.nd2	534.65	720.47	-185.82	0
14	Expt7_t48_Myogenin-105.nd2	1030.11	913.47	116.64	116.64
17	Expt7_t48_Myogenin-104.nd2	731.42	729.64	1.78	1.78
Fiber No.31
2	Expt7_t48_Myogenin-109.nd2	1178.49	1105.86	72.63	72.63		4	1	25	0.25
5	Expt7_t48_Myogenin-109.nd2	1888.9	1729.33	159.57	159.57	positive
8	Expt7_t48_Myogenin-108.nd2	1769.57	1645.16	124.41	124.41
11	Expt7_t48_Myogenin-108.nd2	1578.41	1535.63	42.78	42.78
					Total		196	44
