# Supplementary material for: Heterogeneous levels of delta-like 4 within a multinucleated niche cell maintains muscle stem cell diversity
Source: eLife. 2022 Dec 30;11:e68180. doi: 10.7554/eLife.68180 (PMC9803355; doi:10.7554/eLife.68180)
Supplement: Figure 5—source data 5. [file elife-68180-fig5-data5.xlsx]

## Sheet: Ctrl2_061715
Dll4f/f		30d after tmx_injure muscle_14d regeneration
Ctrl 2_061715
	CSA (μm2)
1	2179
2	2219
3	927
4	1164
5	2588
6	190
7	2070
8	285
9	2479
10	2349
11	2233
12	1985
13	3238
14	910
15	508
16	573
17	1377
18	1970
19	291
20	2381
21	3530
22	221
23	3253
24	1464
25	2636
26	1635
27	170
28	211
29	2183
30	1854
31	3067
32	1703
33	2033
34	2111
35	1429
36	207
37	219
38	157
39	1275
40	1864
41	1660
42	186
43	1600
44	2465
45	1752
46	2134
47	438
48	1611
49	193
50	654
51	800
52	1301
53	793
54	814
55	1294
56	2138
57	1829
58	1925
59	2757
60	4056
61	4269
62	1217
63	2706
64	2808
65	4397
66	3901
67	3285
68	1475
69	2321
70	686
71	327
72	903
73	1834
74	2784
75	3617
76	1206
77	1007
78	1848
79	1235
80	1205
81	763
82	1202
83	825
84	1066
85	1060
86	360
87	1666
88	1933
89	395
90	1186
91	842
92	465
93	750
94	2074
95	1122
96	368
97	1716
98	694
99	1137
100	515
101	1550
102	1525
103	1788
104	2275
105	1883
106	2786
107	2380
108	1036
109	742
110	901
111	1215
112	482
113	183
114	179
115	1887
116	1385
117	1126
118	1255
119	2225
120	1467
121	164
122	1707
123	2702
124	2636
125	934
126	1643
127	1379
128	607
129	2293
130	2889
131	1638
132	2041
133	421
134	903
135	215
136	1676
137	251
138	194
139	721
140	788
141	2200
142	2503
143	1767
144	2726
145	660
146	803
147	283
148	224
149	1000
150	1199
151	2859
152	2270
153	2561
154	3517
155	1924
156	1816
157	300
158	1155
159	189
160	729
161	2382
162	596
163	1207
164	1625
165	2125
166	410
167	1393
168	1485
169	361
170	2326
171	306
172	1077
173	581
174	954
175	1510
176	1349
177	1510
178	1510
179	175
180	492
181	126
182	311
183	526
184	696
185	381
186	1178
187	333
188	1566
189	1028
190	596
191	259
192	1035
193	797
194	821
195	408
196	102
197	872
198	151
199	992
200	1658
201	894
202	1414
203	1847
204	1897
205	1559
206	215
207	1094
208	861
209	265
210	1190
211	721
212	856
213	940
214	1590
215	1733
216	1654
217	136
218	421
219	475
220	1012
221	884
222	510
223	1516
224	254
225	887
226	2497
227	4038
228	840
229	180
230	684
231	496
232	1788
233	859
234	510
235	151
236	2142
237	2650
238	403
239	3972
240	1824
241	2665
242	998
243	2238
244	740
245	1521
246	451
247	874
248	1517
249	871
250	759
251	481
252	195
253	589
254	692
255	1712
256	384
257	111
258	1534
259	161
260	83
261	979
262	574
263	420
264	992
265	1040
266	1355
267	822
268	477
269	1163
270	788
271	419
272	1260
273	583
274	1486
275	752
276	842
277	1137
278	573
279	578
280	815
281	623
282	1619
283	1224
284	670
285	2130
286	1770
287	1635
288	2474
289	2088
290	1746
291	1049
292	1364
293	2030
294	275
295	1791
296	333
297	206
298	144
299	217
300	799
301	441
302	399
303	803
304	705
305	226
306	1172
307	1668
308	1523
309	1213
310	1080
311	1657
312	2097
313	1939
314	2392
315	1403
316	1995
317	512
318	414
319	1414
320	210
321	1452
322	1506
323	1311
324	636
325	856
326	1066
327	1227
328	2327
329	239
330	855
331	88
332	1330
333	963
334	776
335	278
336	158
337	579
338	501
339	241
340	354
341	1168
342	988
343	1156
344	358
345	260
346	325
347	63
348	197
349	76
350	255
351	117
352	193
353	365
354	1161
355	1666
356	157
357	2535
358	2011
359	1098
360	259
361	106
362	79
363	1851
364	749
365	428
366	733
367	776
368	1429
369	895
370	1616
371	1363
372	506
373	1242
374	1013
375	1111
376	438
377	754
378	660
379	346
380	610
381	417
382	665
383	1467
384	1291
385	189
386	276
387	237
388	748
389	501
390	533
391	111
392	823
393	125
394	191
395	123
396	162
397	454
398	375
399	1425
400	1776
401	1053
402	752
403	1248
404	1287
405	179
406	957
407	498
408	905
409	283
410	259
411	76
412	400
413	723
414	239
415	697
416	344
417	491
418	69
419	1356
420	957
421	176
422	1255
423	937
424	2124
425	1927
426	638
427	676
428	1535
429	178
430	577
431	1448
432	615
433	468
434	1575
435	540
436	1861
437	1256
438	805
439	1485
440	888
441	548
442	441
443	273
444	861
445	2644
446	303
447	339
448	156
449	1429
450	1673
451	1430
452	1034
453	854
454	641
455	1476
456	115
457	366
458	692
459	905
460	2195
461	1384
462	125
463	1646
464	1011
465	350
466	1289
467	99
468	723
469	1592
470	1268
471	1679
472	1506
473	637
474	1046
475	1266
476	731
477	624
478	148
479	787
480	956
481	1499
482	240
483	2819
484	600
485	272
486	274
487	1186
488	1346
489	1192
490	1169
491	306
492	1112
493	237
494	575
495	1718
496	711
497	1594
498	2203
499	400
500	57
501	123
502	186
503	254
504	304
505	259
506	657
507	210
508	139
509	155
510	324
511	205
512	338
513	162
514	283
515	1198
516	1030
517	432
518	1270
519	1352
520	322
521	499
522	996
523	932
524	716
525	485
526	591
527	399
528	1621
529	174
530	1284
531	743
532	1343
533	1489
534	1458
535	2406
536	2171
537	696
538	1900
539	1147
540	886
541	709
542	1374
543	1281
544	1203
545	1953
546	678
547	541
548	1085
549	116
550	2096
551	1312
552	940
553	270
554	1384
555	355
556	1115
557	625
558	601
559	720
560	1355
561	849
562	700
563	714
564	584
565	886
566	275
567	270
568	414
569	1054
570	1396
571	747
572	1159
573	1361
574	1220
575	1384
576	1306
577	1178
578	628
579	444
580	878
581	1940
582	1229
583	1341
584	1745
585	1618
586	1585
587	1117
588	1555
589	749
590	1178
591	1134
592	1306
593	1210
594	316
595	491
596	830
597	276
598	922
599	1247
600	1454
601	1204
602	754
603	1008
604	904
605	1372
606	1137
607	1448
608	421
609	1194
610	1133
611	746
612	1835
613	2004
614	1033
615	368
616	1137
617	507
618	1684
619	1755
620	1069
621	1067
622	575
623	1397
624	1948
625	737
626	119
627	2422
628	268
629	412
630	1179
631	1356
632	2450
633	468
634	1434
635	998
636	1864
637	269
638	111
639	2176
640	98
641	1353
642	1167
643	136
644	415
645	638
646	361
647	1488
648	267
649	1861
650	105
651	218
652	898
653	154
654	198
655	158
656	184
657	298
658	2216
659	1593
660	1833
661	1127
662	1209
663	220
664	2225
665	1814
666	1264
667	1742
668	1548
669	480
670	1079
671	435
672	2061
673	1501
674	1296
675	2726
676	1695
677	607
678	919
679	273
680	1799
681	863
682	635
683	877
684	1071
685	1561
686	1261
687	1240
688	752
689	1324
690	1301
691	2262
692	1627
693	1801
694	1682
695	2304
696	2629
697	2219
698	3315
699	3623
700	2928
701	1453
702	1327
703	210
704	1934
705	124
706	191
707	248
708	654
709	512
710	2496
711	227
712	547
713	585
714	218
715	1008
716	241
717	1603
718	1227
719	1192
720	1096
721	830
722	223
723	1397
724	1353
725	1592
726	1349
727	1128
728	1266
729	1278
730	865
731	1788
732	936
733	1073
734	3687
735	2155
736	2252
737	752
738	2519
739	2063
740	340
741	436
742	445
743	501
744	223
745	273
746	1643
747	1905
748	1879
749	3738
750	757
1	3172
2	2394
3	2824
4	2734
5	2805
6	444
7	1373
8	715
9	2631
10	1335
11	1518
12	294
13	272
14	129
15	492
16	1809
17	232
18	2117
19	3054
20	1617
21	720
22	1402
23	1583
24	1823
25	346
26	324
27	522
28	785
29	2719
30	1727
31	1381
32	387
33	470
34	655
1	1481
2	308
3	1457
4	1640
5	638
6	667
7	179
8	158
9	1213
10	600
11	47
12	567
13	891
14	1154
15	736
16	532
17	102
18	944
19	666
20	155
21	490
22	672
23	698
24	1557
25	916
26	1392
27	259
28	1599
29	291
30	53
31	39
32	68
33	76
34	58
35	238
36	245
37	123
38	387
39	584
40	1220
41	968
42	984
43	654
44	246
45	1014
46	153
47	1279
48	412
49	1585
50	786
51	985
52	2014
53	1231
54	1601
55	284
56	974
57	1719
58	248
59	795
60	507
61	1131
62	818
63	518
64	604
65	333
66	179
67	119
68	133
69	57
70	97
71	82
72	662
73	1017
74	297
75	610
76	1233
77	959
78	1548
79	1576
80	1231
81	1199
82	2054
83	1763
84	2269
85	1334
86	349
87	385
88	125
89	113
90	1758
91	514
92	1165
93	906
94	1251
95	1393
96	1178
97	736
98	1616
99	189
100	801
101	454
102	101
103	537
104	334
105	96
106	181
107	1561
108	890
109	279
110	1554
111	1260
112	1439
113	737
114	889
115	1134
116	735
117	701
118	1472
119	798
120	951
121	1374
122	1212
123	644
124	2431
125	984
126	1675
127	363
128	1052
129	581
130	1261
131	880
132	1238
133	692
134	557
135	1183
136	40
137	152
138	40
139	134
140	1812
141	225
142	1268
143	882
144	1910
145	140
146	180
147	620
148	1206
149	1028
150	1218
151	515
152	546
153	1828
154	537
155	582
156	1262
157	206
158	398
159	455
160	1176
161	942
162	220
163	434
164	810
165	777
166	1348
167	1915
168	806
169	697
170	812
171	1495
172	1139
173	486
174	1664
175	96
176	97
177	306
178	243
179	928
180	960
181	1957
182	783
183	1417
184	226
185	1156
186	226
187	107
188	659
189	711
190	1422
191	2325
192	902
193	535
194	586
195	1142
196	90
197	124
198	367
199	530
200	71
201	957
202	112
203	325
204	359
205	968
206	117
207	800
208	559
209	1518
210	101
211	1628
212	542
213	448
214	86
215	76
216	1218
217	125
218	1290
219	639
220	588
221	1218
222	1016
223	1816
224	1665
225	1539
226	80
227	90
228	82
229	1272
230	1903
231	872
232	811
233	594
234	564
235	651
236	152
237	485
238	285
239	571
240	74
241	649
242	533
243	752
244	152
245	1133
246	1075
247	175
248	1643
249	621
250	2108
251	1218
252	1805
253	1609
254	2005
255	2295
256	2367
257	689
258	831
259	1833
260	518
261	695
262	1643
263	399
264	180
265	931
266	50
267	2118
268	1270
269	1535
270	214
271	756
272	698
273	232
274	331
275	932
276	631
277	137
278	2977
279	2310
280	264
281	106
282	117
283	739
284	1217
285	228
286	194
287	482
288	425
289	137
290	1188
291	1265
292	1267
293	129
294	1001
295	977
296	951
297	281
298	128
299	1838
300	120
301	2605
302	1162
303	1901
304	670
305	168
306	519
307	490
308	1672
309	1765
310	393
311	1445
312	319
313	194
314	357
315	135
316	179
317	375
318	118
319	873
320	1578
321	467
322	162
323	125
324	144
325	276
326	1752
327	2403
328	324
329	2399
330	1837
331	1122
332	1211
333	3294
334	761
335	77
336	773
337	2417
338	292
339	414
340	1970
341	1664
342	1902
343	1437
344	2476
345	136
346	90
347	200
348	179
349	316
350	1166
351	988
352	995
353	1672
354	914
355	1104
356	998
357	2264
358	1445
359	1582
360	302
361	624
362	954
363	112
364	2366
365	1352
366	1330
367	646
368	1172
369	1012
370	2374
371	1713
372	1612
373	796
374	984
375	1704
376	322
377	201
378	731
379	1395
380	1007
381	143
382	136
383	104
384	204
385	127
386	488
387	2513
388	855
389	473
390	1297
391	89
392	375
393	431
394	1884
395	359
396	461
397	155
398	206
399	123
400	285
401	531
402	510
403	263
404	1517
405	81
406	736
407	104
408	131
409	330
410	1221
411	135
412	213
413	186
414	275
415	108
416	1133
417	524
418	2517
419	437
420	153
421	51
422	122
423	617
424	462
425	809
426	82
427	240
428	273
429	83
430	157
431	201
432	196
433	474
434	170
435	1897
436	1826
437	1471
438	1148
439	74
440	116
441	105
442	612
443	196
444	432
445	311
446	141
447	225
448	166
449	116
450	989
451	254
452	558
453	683
454	328
455	312
456	337
457	1344
458	1356
459	620
460	1331
461	691
462	762
463	1081
464	1376
465	162
466	1028
467	1667
468	2560
469	1153
470	815
471	545
472	623
473	834
474	1357
475	3137
476	5789
477	3637
478	1137
479	940
480	1228
481	161
482	202
483	337
484	348
485	420
486	1646
487	113
488	779
489	1771
490	159
491	275
492	180
493	77
494	985
495	1591
496	1281
497	256
498	2501
499	344
500	1010
501	387
502	817
503	376
504	515
505	1864
506	422
507	559
508	711
509	1156
510	437
511	3238
512	1380
513	59
514	1551
515	219
516	152
517	800
518	932
519	863
520	702
521	447
522	556
523	117
524	347
525	235
526	382
527	173
528	655
529	1495
530	471
531	660
532	434
533	596
534	365
535	73
536	144
537	224
538	889
539	633
540	298
541	545
542	237
543	123
544	1308
545	254
546	870
547	883
548	144
549	1128
550	45
551	325
552	155
553	550
554	71
555	178
556	361
557	695
558	352
559	1032
560	183
561	333
562	1685
563	1154
564	93
565	2412
566	1485
567	319
568	831
569	456
570	1058
571	1346
572	281
573	1191
574	900
575	2749
576	1246
577	297
578	1267
579	398
580	607
581	405
582	523
583	425
584	639
585	128
586	1120
587	637
588	457
589	734
590	485
591	524
592	978
593	609
594	607
595	908
596	389
597	545
598	243
599	135
600	125
601	410
602	754
603	507
604	1857
605	1131
606	1559
607	856
608	496
609	181
610	182
611	87
612	184
613	85
614	379
615	439
616	1122
617	2284
618	307
619	179
620	44
621	540
622	437
623	358
624	739
625	2750
626	1110
627	462
628	349
629	530
630	122
631	638
632	272
633	351
634	724
635	1478
636	1274
637	353
638	945
639	1425
640	1322
641	218
642	1641
643	130
644	1122
645	885
646	122
647	536
648	1121
649	2112
650	657
651	351
652	291
653	76
654	1471
655	111
656	27
657	538
658	637
659	562
660	1559
661	901
662	113
663	1311
664	1011
665	489
666	867
667	374
668	444
669	1011
670	207
671	393
672	234
673	334
674	156
675	1210
676	829
677	1155
678	272
679	630
680	639
681	419
682	867
683	333
684	1371
685	117
686	151
687	556
688	299
689	365
690	1474
691	110
692	75
693	482
694	545
695	137
696	161
697	146
698	451
699	674
700	180
701	1382
702	232
703	68
704	125
705	254
706	65
707	114
708	609
709	795
710	380
711	130
712	650
713	681
714	1063
715	861
716	146
717	349
718	2311
719	98
720	207
721	234
722	713
723	516
724	2146
725	1006
726	948
727	684
728	1009
729	119
730	1794
731	1124
732	684
733	103
734	106
735	65
736	681
737	91
738	1281
739	1136
740	868
741	179
742	525
743	1372
744	684
745	65
746	169
747	668
748	1705
749	1014
750	518
751	797
752	980
753	510
754	1286
755	1442
756	878
757	1036
758	2260
759	273
760	107
761	226
762	254
763	279
764	1041
765	459
766	373
767	1507
768	689
769	123
770	74
771	814
772	1843
773	354
774	1690
775	1232
776	172
777	150
778	1111
779	1258
780	593
781	823
782	1006
783	1145
784	157
785	168
786	717
787	196
788	900
789	423
790	264
791	599
792	243
793	168
794	247
795	327
796	307
797	120
798	586
799	479
800	1338
801	1198
802	875
803	152
804	913
805	540
806	1107
807	323
808	46
809	146
810	96
811	227
812	1080
813	1018
814	1288
815	1014
816	1000
817	687
818	960
819	1151
820	718
821	107
822	275
823	629
824	68
825	1112
826	298
827	730
828	1144
829	352
830	1447
831	673
1	1797
2	84
3	126
4	168
5	215
6	161
7	775
8	1399
9	336
10	90
11	506
12	357
13	243
14	50
15	47
16	1363
17	998
18	1317
19	393
20	616
21	1021
22	960
23	799
24	704
25	624
26	1029
27	989
28	1093
29	1864
30	1959
31	507
32	759
33	1495
34	204
35	275
36	1265
37	879
38	98
39	202
40	675
41	1045
42	1780
43	391
44	668
45	139
46	273
47	76
48	55
49	114
50	87
51	858
52	2206
53	2837
54	241
55	532
56	2288
57	1445
58	185
59	79
60	184
61	768
62	1426
63	203
64	1028
65	1938
66	64
67	906
68	1165
69	446
70	162
71	334
72	109
73	267
74	1823
75	182
76	333
77	1053
78	919
79	98
80	1195
81	377
82	2219
83	310
84	1275
85	373
86	1127
87	1037
88	139
89	722
90	336
91	929
92	425
93	809
94	761
95	90
96	493
97	589
98	95
99	327
100	1118
101	549
102	1333
103	1364
104	714
105	1067
106	195
107	191
108	127
109	375
110	1797
111	1811
112	164
113	164
114	125
115	125
116	777
117	535
118	372
119	1471
120	989
121	611
122	361
123	1093
124	886
125	1000
126	1161
127	1567
128	790
129	483
130	804
131	721
132	386
133	485
134	440
135	660
136	480
137	962
138	338
139	369
140	490
141	1058
142	1292
143	1260
144	310
145	94
146	288
147	136
148	1185
149	633
150	934
151	613
152	190
153	831
154	1248
155	1588
156	606
157	1631
158	132
159	316
160	349
161	96
162	268
163	186
164	183
165	727
166	223
167	393
168	894
169	703
170	109
171	165
172	247
173	828
174	794
175	623
176	548
177	1132
178	517
179	94
180	109
181	429
182	1265
183	98
184	87
185	127
186	720
187	135
188	998
189	867
190	433
191	116
192	149
193	144
194	106
195	33
196	968
197	1327
198	465
199	479
200	1011
201	875
202	631
203	164
204	1271
205	67
206	98
207	804
208	1525
209	773
210	101
211	248
212	91
213	1265
214	2460
215	1422
216	1997
217	244
218	90
219	232
220	1317
221	718
222	305
223	1118
224	1130
225	1531
226	1212
227	114
228	528
229	1546
230	1993
231	2840
232	1198
233	1964
234	55
235	1524
236	1579
237	900
238	2731
239	38
240	72
241	1745
242	824
243	1750
244	439
245	1911
246	1752
247	98
248	187
249	68
250	120
251	142
252	811
253	1357
254	223
255	1191
256	2055
257	1656
258	1557
259	495
260	118
261	148
262	100
263	1306
264	1638
265	546
266	297
267	150
268	925
269	134
270	95
271	1096
272	1066
273	1750
274	1788
275	676
276	954
277	267
278	1044
279	1689
280	2016
281	786
282	55
283	950
284	557
285	1087
286	758
287	2049
288	514
289	130
290	484
291	1514
292	1071
293	483
294	833
295	275
296	355
297	648
298	106
299	93
300	167
301	311
302	88
303	823
304	1122
305	901
306	1243
307	1437
308	241
309	1368
310	655
311	632
312	927
313	260
314	1520
315	442
316	634
317	377
318	537
319	527
320	1455
321	99
322	149
323	373
324	920
325	1053
326	751
327	765
328	507
329	403
330	497
331	334
332	949
333	741
334	630
335	938
336	658
337	337
338	215
339	1768
340	90
341	207
342	289
343	1217
344	203
345	1287
346	111
347	93
348	690
349	482
350	601
351	881
352	147
353	739
354	392
355	1683
356	1251
357	729
358	337
359	132
360	274
361	244
362	654
363	619
364	491
365	120
366	627
367	1359
368	167
369	254
370	176
371	873
372	668
373	1627
374	645
375	68
376	2607
377	144
378	779
379	1461
380	823
381	2451
382	1549
[truncated: 1,041 more rows]

## Sheet: Expt5_061715
mCre-Dll4f/f		30d after tmx_injure muscle_14d regeneration
Expt 5_061715
	CSA (μm2)
1	2257
2	1289
3	690
4	3019
5	1040
6	1390
7	1262
8	856
9	537
10	1010
11	904
12	1444
13	860
14	764
15	1587
16	1911
17	654
18	988
19	1353
20	621
21	1374
22	881
23	2217
24	1554
25	1004
26	1925
27	3467
28	695
29	1290
30	886
31	382
32	523
33	1095
34	1200
35	1030
36	561
37	1149
38	744
39	1330
40	1457
41	1171
42	1123
43	827
44	1134
45	706
46	1888
47	1162
48	3613
49	824
50	716
51	3511
52	1280
53	786
54	1239
55	1115
56	2783
57	807
58	1407
59	479
60	878
61	754
62	515
63	719
64	1476
65	1150
66	828
67	540
68	570
69	1140
70	536
71	468
72	822
73	653
74	1272
75	790
76	2240
77	1091
78	736
79	1479
80	995
81	843
82	1028
83	624
84	2906
85	1535
86	842
87	786
88	1401
89	792
90	600
91	1637
92	490
93	1406
94	2701
95	1145
96	2063
97	991
98	1041
99	1163
100	543
101	783
102	1225
103	824
104	554
105	1089
106	774
107	1046
108	1348
109	1339
110	1028
111	776
112	1677
113	968
114	1345
115	1131
116	1423
117	1547
118	1474
119	804
120	780
121	1193
122	509
123	664
124	1221
125	926
126	1586
127	910
128	575
129	1202
130	1460
131	1684
132	503
133	634
134	799
135	592
136	1360
137	1289
138	1238
139	814
140	452
141	609
142	461
143	845
144	2412
145	1001
146	539
147	695
148	1055
149	973
150	1633
151	1689
152	766
153	1616
154	1210
155	874
156	967
157	1078
158	1612
159	866
160	1017
161	861
162	2029
163	572
164	927
165	999
166	582
167	1197
168	1265
169	891
170	549
171	712
172	1919
173	910
174	2635
175	1214
176	958
177	727
178	1629
179	887
180	967
181	1224
182	599
183	721
184	1123
185	489
186	800
187	1005
188	1182
189	1344
190	880
191	1273
192	1392
193	623
194	852
195	769
196	634
197	2017
198	2096
199	1572
200	470
201	816
202	1342
203	1458
204	852
205	1426
206	646
207	1432
208	709
209	1769
210	428
211	1630
212	1393
213	1030
214	1221
215	631
216	943
217	1278
218	1109
219	432
220	691
221	909
222	514
223	680
224	378
225	649
226	811
227	771
228	520
229	836
230	726
231	687
232	1144
233	409
234	628
235	744
236	1424
237	1021
238	946
239	778
240	796
241	1150
242	657
243	823
244	548
245	1052
246	746
247	1003
248	821
249	2036
250	1699
251	1194
252	586
253	1099
254	1812
255	836
256	702
257	501
258	473
259	939
260	594
261	862
262	923
263	1749
264	555
265	1141
266	910
267	1333
268	1008
269	571
270	1156
271	867
272	1796
273	924
274	1188
275	852
276	1001
277	733
278	637
279	731
280	884
281	807
282	1084
283	649
284	523
285	1196
286	1001
287	992
288	602
289	1092
290	735
291	665
292	522
293	870
294	1316
295	755
296	1174
297	758
298	535
299	970
300	1193
301	764
302	1207
303	687
304	1326
305	1652
306	1689
307	921
308	724
309	1060
310	1280
311	1571
312	1288
313	754
314	672
315	966
316	785
317	522
318	868
319	725
320	472
321	430
322	916
323	1951
324	627
325	1129
326	539
327	1184
328	952
329	507
330	812
331	712
332	533
333	988
334	1284
335	1232
336	695
337	562
338	623
339	2214
340	2123
341	928
342	1510
343	892
344	799
345	711
346	647
347	544
348	1376
349	1540
350	974
351	1148
352	782
353	743
354	1025
355	479
356	1077
357	1341
358	899
359	1082
360	1295
361	679
362	430
363	786
364	886
365	1947
366	906
367	763
368	682
369	791
370	1785
371	1164
372	1338
373	575
374	451
375	968
376	492
377	1014
378	633
379	1042
380	637
381	908
382	882
383	824
384	863
385	982
386	1512
387	1281
388	1052
389	960
390	1775
391	915
392	813
393	810
394	899
395	800
396	946
397	968
398	1393
399	799
400	858
401	1417
402	582
403	418
404	1042
405	1029
406	673
407	462
408	253
409	534
410	197
411	213
412	405
413	209
414	693
415	292
416	255
417	174
418	666
419	627
420	458
421	231
422	284
423	170
424	554
425	300
426	481
427	196
428	588
429	329
430	654
431	346
432	640
433	292
434	156
435	341
436	1473
437	120
438	214
439	109
440	334
441	281
442	440
443	397
444	314
445	699
446	204
447	702
448	316
449	758
450	181
451	255
452	120
453	234
454	230
455	544
456	636
457	435
458	518
459	848
460	767
461	273
462	517
463	468
464	735
465	390
466	591
467	925
468	786
469	586
470	463
471	499
472	574
473	378
474	183
475	553
476	449
477	561
478	272
479	226
480	295
481	912
482	508
483	476
484	513
485	1118
486	218
487	240
488	217
489	1333
490	1848
491	202
492	347
493	324
494	645
495	1171
496	371
497	89
498	848
499	642
500	215
501	1104
502	155
503	86
504	345
505	401
506	260
507	1534
508	272
509	180
510	885
511	282
512	170
513	212
514	750
515	73
516	375
517	463
518	556
519	191
520	583
521	974
522	140
523	165
524	262
525	818
526	433
527	110
528	118
529	575
530	576
531	258
532	327
533	811
534	208
535	175
536	1119
537	1001
538	572
539	397
540	1161
541	448
542	334
543	392
544	498
545	424
546	163
547	286
548	894
549	1635
550	800
551	585
552	547
553	602
554	895
555	988
556	384
557	349
558	188
559	241
560	480
561	275
562	542
563	146
564	178
565	353
566	135
567	1147
568	553
569	168
570	755
571	462
572	179
573	157
574	207
575	350
576	127
577	575
578	371
579	1297
580	265
581	1015
582	270
583	524
584	58
585	103
586	381
587	959
588	409
589	93
590	238
591	224
592	651
593	223
594	440
595	203
596	419
597	200
598	195
599	201
600	260
601	545
602	447
603	306
604	485
605	353
606	473
607	349
608	513
609	454
610	423
611	542
612	292
613	521
614	237
615	492
616	326
617	1036
618	482
619	1211
620	167
621	570
622	394
623	401
624	167
625	938
626	498
627	211
628	103
629	106
630	223
631	166
632	234
633	333
634	202
635	207
636	197
637	332
638	340
639	401
640	318
641	281
642	240
643	193
644	185
645	182
646	213
647	158
648	198
649	131
650	165
651	248
652	257
653	246
654	274
655	467
656	128
657	367
658	353
659	478
660	144
661	425
662	420
663	90
664	352
665	224
666	366
667	83
668	292
669	96
670	114
671	348
672	416
673	93
674	303
675	444
676	395
677	145
678	252
679	62
680	265
681	324
682	94
683	281
684	130
685	196
686	222
687	95
688	331
689	180
690	396
691	521
692	151
693	273
694	259
695	120
696	158
697	216
698	397
699	278
700	241
701	96
702	177
703	416
704	112
705	117
706	153
707	453
708	222
709	275
710	441
711	273
712	205
713	132
714	185
715	132
716	349
717	314
718	344
719	250
720	220
721	68
722	243
723	124
724	232
725	152
726	237
727	448
728	530
729	316
730	270
731	356
732	454
733	139
734	203
735	279
736	194
737	251
738	316
739	458
740	570
741	90
742	127
743	194
744	146
745	270
746	189
747	136
748	418
749	93
750	259
751	177
752	144
753	244
754	296
755	237
756	213
757	206
758	106
759	156
760	440
761	164
762	164
763	455
764	454
765	270
766	246
767	330
768	114
769	205
770	388
771	297
772	243
773	276
774	210
775	621
776	233
777	440
778	640
779	350
780	215
781	481
782	246
783	182
784	234
785	261
786	202
787	569
788	504
789	249
790	97
791	138
792	213
793	123
794	112
795	175
796	365
797	207
798	278
799	193
800	191
801	206
802	313
803	226
804	94
805	303
806	288
807	337
808	351
809	266
810	118
811	194
812	147
813	158
814	256
815	218
816	491
817	255
818	196
819	293
820	286
821	95
822	297
823	334
824	124
825	85
826	279
827	207
828	68
829	258
830	637
831	927
832	142
833	694
834	1169
835	921
836	277
837	880
838	825
839	950
840	728
841	893
842	645
843	337
844	139
845	252
846	481
847	328
848	357
849	266
850	276
851	329
852	157
853	335
854	134
855	193
856	452
857	160
858	208
859	248
860	233
861	557
862	215
863	155
864	472
865	404
866	186
867	186
868	319
869	281
870	141
871	333
872	437
873	92
874	125
875	328
876	259
877	383
878	171
879	349
880	333
881	644
882	136
883	209
1	2780
2	1845
3	2745
4	474
5	2269
6	1444
7	2857
8	2989
9	3913
10	3482
11	824
12	237
13	649
14	1772
15	1659
16	1603
17	766
18	1089
19	984
20	871
21	1265
22	806
23	2052
24	1961
25	3354
26	790
27	1437
28	739
29	821
30	2943
31	837
32	262
33	2014
34	790
35	985
36	767
37	615
38	1728
39	1325
40	1022
41	541
42	810
43	5168
44	1446
45	502
46	1676
47	1422
48	845
49	409
50	560
51	511
52	240
53	454
54	274
55	194
56	420
57	731
58	559
59	1292
60	918
61	697
62	665
63	349
64	245
65	406
66	474
67	255
68	1330
69	1227
70	517
71	621
72	265
73	285
74	558
75	470
76	1205
77	479
78	937
79	892
80	1205
81	1067
82	738
83	1297
84	690
85	714
86	847
87	414
88	534
89	785
90	651
91	1023
92	152
93	297
94	234
95	573
96	567
97	294
98	254
99	321
100	261
101	921
102	1919
103	252
104	227
105	246
106	312
107	755
108	662
109	1139
110	1075
111	899
112	1135
113	1649
114	383
115	896
116	234
117	186
118	430
119	190
120	321
121	840
122	630
123	152
124	564
125	234
126	916
127	970
128	529
129	1077
130	625
131	439
132	556
133	199
134	995
135	310
136	401
137	397
138	237
139	240
140	172
141	261
142	360
143	214
144	526
145	2004
146	492
147	142
148	638
149	276
150	622
151	208
152	856
153	371
154	199
155	241
156	403
157	1165
158	383
159	868
160	409
161	269
162	469
163	260
164	456
165	495
166	191
167	260
168	342
169	292
170	479
171	279
172	210
173	280
174	226
175	115
176	446
177	583
178	276
179	397
180	578
181	318
182	332
183	583
184	518
185	1815
186	697
187	1550
188	465
189	1204
190	317
191	331
192	295
193	256
194	868
195	676
196	793
197	962
198	940
199	1612
200	350
201	375
1	373
2	321
3	498
4	1080
5	264
6	600
7	111
8	131
9	106
10	206
11	403
12	273
13	88
14	431
15	138
16	123
17	171
18	207
19	139
20	178
21	203
22	143
23	191
24	210
25	850
26	955
27	210
28	380
29	149
30	676
31	117
32	575
33	235
34	375
35	914
36	895
37	477
38	174
39	1621
40	347
41	159
42	286
43	464
44	704
45	266
46	504
47	429
48	267
49	365
50	1110
51	821
52	461
53	782
54	929
55	1513
56	302
57	2390
58	907
59	666
60	976
61	875
62	1323
63	1070
64	195
65	466
66	1213
67	711
68	412
69	249
70	850
71	1481
72	663
73	300
74	316
75	1134
76	196
77	304
78	560
79	152
80	1179
81	1202
82	756
83	1338
84	361
85	117
86	168
87	322
88	413
89	426
90	777
91	571
92	398
93	610
94	1559
95	693
96	1633
97	515
98	840
99	1261
100	305
101	319
102	551
103	397
104	674
105	98
106	1232
107	1484
108	844
109	1554
110	247
111	265
112	659
113	527
114	981
115	670
116	1126
117	1137
118	289
119	164
120	521
121	1111
122	1069
123	529
124	756
125	1241
126	1268
127	226
128	712
129	165
130	310
131	1139
132	232
133	78
134	860
135	2025
136	1067
137	260
138	672
139	1367
140	2276
141	701
142	447
143	733
144	697
145	260
146	166
147	2296
148	2273
149	321
150	59
151	478
152	346
153	1409
154	1517
155	435
156	163
157	496
158	382
159	668
160	311
161	609
162	111
163	967
164	166
165	756
166	113
167	512
168	119
169	101
170	2200
171	780
172	508
173	205
174	107
175	168
176	863
177	340
178	154
179	551
180	232
181	142
182	679
183	237
184	531
185	384
186	570
187	867
188	220
189	736
190	384
191	1205
192	276
193	667
194	1472
195	402
196	434
197	174
198	194
199	1342
200	1602
201	1069
202	1301
203	165
204	217
205	147
206	184
207	1135
208	499
209	842
210	623
211	174
212	190
213	1818
214	611
215	1244
216	1300
217	576
218	154
219	447
220	248
221	184
222	372
223	1280
224	1480
225	570
226	289
227	394
228	215
229	1230
230	327
231	1821
232	194
233	153
234	276
235	779
236	990
237	398
238	409
239	516
240	209
241	683
242	596
243	298
244	334
245	176
246	821
247	112
248	68
249	586
250	238
251	405
252	202
253	114
254	1180
255	222
256	871
257	344
258	730
259	181
260	199
261	912
262	384
263	1736
264	799
265	678
266	965
267	1061
268	700
269	690
270	806
271	257
272	187
273	291
274	234
275	112
276	215
277	1081
278	642
279	568
280	306
281	944
282	521
283	999
284	406
285	629
286	279
287	505
288	843
289	242
290	779
291	162
292	767
293	447
294	661
295	268
296	280
297	554
298	87
299	323
300	676
301	1548
302	111
303	190
304	556
305	346
306	676
307	147
308	301
309	154
310	220
311	1747
312	669
313	471
314	492
315	454
316	177
317	150
318	192
319	919
320	460
321	206
322	134
323	248
324	605
325	979
326	758
327	120
328	306
329	645
330	528
331	174
332	281
333	713
334	176
335	197
336	141
337	540
338	674
339	226
340	242
341	347
342	175
343	211
344	213
345	360
346	396
347	144
348	418
349	348
350	306
351	708
352	140
353	798
354	386
355	143
356	131
357	1026
358	886
359	187
360	644
361	689
362	270
363	485
364	565
365	297
366	365
367	455
368	162
369	702
370	157
371	156
372	162
373	334
374	257
375	150
376	215
377	259
378	406
379	219
380	141
381	962
382	452
383	913
384	618
385	214
386	252
387	660
388	518
389	597
390	384
391	403
392	1001
393	162
394	252
395	809
396	548
397	198
398	446
399	298
400	209
401	424
402	400
403	246
404	311
405	453
406	670
407	767
408	195
409	1195
410	490
411	466
412	139
413	161
414	441
415	144
416	208
417	265
418	198
419	243
420	244
421	183
422	331
423	172
424	241
425	472
426	311
427	166
428	989
429	569
430	195
431	1374
432	502
433	225
434	381
435	174
436	183
437	1214
438	2904
439	439
440	457
441	269
442	124
443	539
444	335
445	306
446	668
447	379
448	561
449	431
450	967
451	308
452	399
453	1141
454	988
455	709
456	283
457	1023
458	245
459	326
460	120
461	291
462	450
463	128
464	189
465	352
466	260
467	489
468	360
469	376
470	387
471	567
472	148
473	420
474	117
475	206
476	251
477	340
478	240
479	303
480	556
481	281
482	391
483	414
484	172
485	328
486	171
487	351
488	237
489	359
490	160
491	692
492	243
493	480
494	343
495	253
496	668
497	703
498	614
499	318
500	488
501	90
502	170
503	223
504	243
505	296
506	272
507	548
508	403
509	611
510	752
511	266
512	559
513	792
514	762
515	493
516	1241
517	704
518	283
519	372
520	455
521	361
522	94
523	200
524	709
525	204
526	323
527	277
528	322
529	394
530	515
531	259
532	444
533	873
534	196
535	477
536	319
537	738
538	1105
539	184
540	463
541	331
542	935
543	581
544	207
545	319
546	699
547	775
548	354
549	845
550	343
551	171
552	552
553	783
554	150
555	147
556	252
557	180
558	318
559	873
560	678
561	504
562	992
563	697
564	874
565	334
566	305
567	618
568	817
569	1098
570	336
571	430
572	451
573	360
574	1377
575	882
576	245
577	168
578	1049
579	382
580	399
581	280
582	432
583	79
584	216
585	158
586	188
587	129
588	560
589	358
590	228
591	453
592	245
593	294
594	330
595	237
596	482
597	451
598	1610
599	447
600	402
601	490
602	565
603	738
604	434
605	217
606	600
607	362
608	431
609	349
610	331
611	311
612	507
613	466
614	910
615	307
616	653
617	762
618	219
619	201
620	273
621	515
622	1076
623	367
624	701
625	1273
626	509
627	192
628	202
629	411
630	149
631	603
632	453
633	192
634	223
635	387
636	221
637	549
638	205
639	266
640	163
641	293
642	328
643	252
644	954
645	738
646	599
647	284
648	201
649	271
650	229
651	133
652	220
653	271
654	260
655	308
656	572
657	559
658	447
659	931
660	136
661	183
662	797
663	1047
664	913
665	660
666	61
667	414
668	412
669	685
670	140
671	105
672	186
673	337
674	167
675	387
676	271
677	798
678	132
679	159
680	253
681	804
682	145
683	160
684	467
685	989
686	570
687	224
688	437
689	847
690	140
691	144
692	152
693	1046
694	409
695	149
696	188
697	355
698	1299
699	495
700	252
701	375
702	750
703	1251
704	755
705	109
706	172
707	218
708	669
709	518
710	190
711	64
712	164
713	542
714	139
715	785
716	161
717	158
718	142
719	1355
720	451
721	326
722	161
723	86
724	281
725	735
726	426
727	473
728	573
729	666
730	349
731	188
732	267
733	565
734	703
735	200
736	921
737	1657
738	1291
739	708
740	443
741	188
742	213
743	146
744	155
745	135
746	827
747	321
748	329
749	359
750	277
751	439
752	202
753	634
754	465
755	625
756	240
757	357
758	166
759	357
760	443
761	1047
762	326
763	494
764	371
765	262
766	116
767	288
768	97
769	84
770	924
771	224
772	174
773	211
774	87
775	274
776	177
777	198
778	475
1	1122
2	1108
3	1129
4	187
5	458
6	311
7	180
8	128
9	394
10	1069
11	523
12	725
13	397
14	287
15	427
16	515
17	751
18	120
19	170
20	227
21	939
22	1161
23	211
24	217
25	150
26	177
27	170
28	261
29	180
30	173
31	235
32	816
33	216
34	693
35	447
36	259
37	609
38	261
39	452
40	208
41	831
42	743
43	551
44	595
45	1054
46	761
47	198
48	1158
49	668
50	544
51	840
52	109
53	284
54	174
55	630
56	248
57	316
58	297
59	382
60	832
61	1277
62	287
63	202
64	400
65	301
66	420
67	738
68	1273
69	1364
70	967
71	592
72	297
73	324
74	112
75	240
76	114
77	267
78	366
79	132
80	206
81	316
82	440
83	376
84	439
85	222
86	224
87	240
88	701
89	98
90	675
91	796
92	204
93	106
94	242
95	1010
96	324
97	380
98	328
99	712
100	139
101	1595
102	294
103	138
104	100
105	240
106	143
107	255
108	139
109	300
110	218
111	988
112	1568
113	1086
114	1134
115	372
116	454
117	714
118	712
119	843
120	722
121	286
122	489
123	417
124	907
125	494
126	656
127	946
128	339
129	130
130	389
131	2206
132	236
133	170
134	1144
135	810
[truncated: 375 more rows]

## Sheet: Expt7_061715
Muscle Cre-Dll4f/f		30d after tmx_injure muscle_14d regeneration
Expt 7_061715
	CSA (μm2)
1	817
2	1525
3	3061
4	4407
5	231
6	58
7	96
8	895
9	945
10	1582
11	98
12	48
13	96
14	73
15	448
16	508
17	126
18	68
19	309
20	4200
21	3797
22	164
23	1963
24	1120
25	107
26	641
27	1557
28	580
29	1277
30	146
31	2102
32	526
33	122
34	132
35	526
36	515
37	1199
38	130
39	74
40	2101
41	1061
42	472
43	734
44	224
45	180
46	52
47	152
48	83
49	294
50	345
51	656
52	92
53	83
54	105
55	972
56	79
57	856
58	155
59	527
60	278
61	512
62	77
63	800
64	384
65	100
66	579
67	153
68	229
69	148
70	166
71	208
72	46
73	71
74	53
75	124
76	283
77	71
78	234
79	83
80	272
81	189
82	294
83	104
84	155
85	45
86	825
87	87
88	75
89	136
90	145
91	328
92	77
93	101
94	174
95	297
96	105
97	277
98	179
99	135
100	117
101	97
102	205
103	42
104	155
105	35
106	62
107	79
108	82
109	88
110	131
111	237
112	131
113	183
114	64
115	90
116	122
117	147
118	264
119	394
120	55
121	55
122	170
123	241
124	254
125	101
126	82
127	330
128	114
129	235
130	67
131	70
132	105
133	108
134	159
135	383
136	72
137	58
138	87
139	50
140	220
141	46
142	317
143	51
144	64
145	57
146	181
147	72
148	88
149	146
150	50
151	91
152	227
153	98
154	172
155	52
156	112
157	181
158	205
159	172
160	127
161	76
162	227
163	92
164	211
165	109
166	85
167	240
168	48
169	65
170	80
171	102
172	546
173	182
174	93
175	126
176	212
177	42
178	53
179	52
180	401
181	570
182	259
183	69
184	86
185	530
186	77
187	446
188	71
189	71
190	85
191	222
192	81
193	53
194	241
195	99
196	172
197	153
198	446
199	132
200	109
201	113
202	329
203	436
204	378
205	271
206	306
207	491
208	275
209	158
210	260
211	144
212	433
213	174
214	83
215	152
216	170
217	258
218	159
219	133
220	298
221	96
222	167
223	205
224	186
225	50
226	232
227	379
228	511
229	117
230	101
231	106
232	138
233	139
234	488
235	52
236	241
237	251
238	583
239	172
240	575
241	1046
242	52
243	34
244	54
245	41
246	140
247	28
248	375
249	146
250	194
251	120
252	117
253	134
254	49
255	200
256	43
257	92
258	392
259	296
260	26
261	120
262	187
263	1075
264	132
265	70
266	238
267	224
268	132
269	61
270	228
271	224
272	272
273	440
274	140
275	53
276	140
277	290
278	614
279	176
280	510
281	1115
282	231
283	458
284	561
285	44
286	1277
287	1171
288	1805
289	2209
290	151
291	164
292	527
293	104
294	69
295	45
296	112
297	310
298	134
299	96
300	64
301	85
302	135
303	712
304	420
305	229
306	390
307	423
308	99
309	276
310	52
311	331
312	854
313	537
314	102
315	224
316	460
317	214
318	226
319	491
320	274
321	477
322	41
323	188
324	115
325	27
326	39
327	111
328	77
329	63
330	135
331	105
332	127
333	1094
334	553
335	407
336	439
337	388
338	34
339	193
340	253
341	275
342	157
343	287
344	213
345	1499
346	692
347	399
348	1330
349	145
350	20
351	196
352	150
353	160
354	170
355	319
356	241
357	140
358	246
359	204
360	212
361	80
362	52
363	151
364	238
365	145
366	50
367	95
368	32
369	599
370	461
371	90
372	71
373	129
374	101
375	183
376	214
377	27
378	27
379	274
380	46
381	178
382	257
383	269
384	128
385	49
386	418
387	165
388	414
389	418
390	165
391	159
392	71
393	703
394	92
395	156
396	238
397	56
398	38
399	96
400	220
401	222
402	92
403	290
404	162
405	47
406	164
407	280
408	131
409	74
410	99
411	87
412	821
413	301
414	155
415	399
416	82
417	39
418	64
419	177
420	153
421	207
422	425
423	210
424	277
425	383
426	137
427	53
428	94
429	68
430	95
431	842
432	132
433	153
434	367
435	435
436	367
437	234
438	389
439	454
440	285
441	55
442	278
443	292
444	146
445	444
446	162
447	442
448	227
449	170
450	230
451	326
452	620
453	150
454	511
455	136
456	243
457	51
458	266
459	73
460	86
461	320
462	40
463	278
464	496
465	434
466	256
467	72
468	48
469	556
470	464
471	224
472	167
473	61
474	136
475	95
476	55
477	138
478	117
479	295
480	77
481	71
482	61
483	44
484	148
485	41
486	360
487	188
488	191
489	296
490	253
491	580
492	157
493	161
494	47
495	437
496	152
497	354
498	152
499	90
500	167
501	164
502	78
503	72
504	986
505	501
506	102
507	200
508	85
509	112
510	172
511	294
512	55
513	229
514	149
515	248
516	65
517	237
518	188
519	450
520	417
521	223
522	259
523	626
524	275
525	33
526	163
527	250
528	220
529	186
530	343
531	121
532	497
533	70
534	184
535	160
536	455
537	118
538	350
539	79
540	79
541	47
542	45
543	657
544	236
545	525
546	192
547	242
548	44
549	635
550	701
551	184
552	171
553	156
554	200
555	781
556	134
557	110
558	401
559	118
560	52
561	47
562	264
563	128
564	85
565	143
566	626
567	243
568	12
569	160
570	493
571	184
572	26
573	237
574	142
575	453
576	53
577	84
578	634
579	184
580	138
581	91
582	263
583	385
584	203
585	147
586	104
587	112
588	641
589	60
590	470
591	55
592	215
593	71
594	244
595	62
596	108
597	60
598	73
599	93
600	286
601	294
602	134
603	209
604	136
605	145
606	85
607	270
608	78
609	93
610	334
611	79
612	203
613	341
614	273
615	354
616	165
617	106
618	43
619	32
620	201
621	262
622	93
623	97
624	38
625	58
626	150
627	149
628	66
629	213
630	120
631	97
632	38
633	104
634	30
635	203
636	287
637	143
638	381
639	22
640	85
641	103
642	304
643	148
644	52
645	143
646	100
647	74
648	197
649	26
650	226
651	52
652	56
653	139
654	91
655	136
656	77
657	81
658	261
659	140
660	87
661	280
662	135
663	307
664	117
665	111
666	334
667	245
668	123
669	240
670	89
671	94
672	64
673	82
674	139
675	79
676	150
677	292
678	122
679	324
680	151
681	159
682	53
683	26
684	71
685	255
686	53
687	246
688	474
689	35
690	94
691	116
692	146
693	71
694	249
695	77
696	163
697	76
698	141
699	125
700	188
701	133
702	114
703	76
704	44
705	126
706	133
707	220
708	247
709	172
710	163
711	49
712	176
713	46
714	73
715	74
716	232
717	237
718	157
719	237
720	39
721	303
722	353
723	185
724	248
725	96
726	56
727	254
728	184
729	103
730	65
731	229
732	855
733	160
734	50
735	151
736	94
737	117
738	39
739	63
740	138
741	80
742	70
743	76
744	214
745	53
746	171
747	285
748	49
749	125
750	135
751	123
752	109
753	143
754	356
755	109
756	164
757	101
758	712
759	229
760	318
761	314
762	125
763	155
764	154
765	577
766	189
767	88
768	442
769	313
770	52
771	70
772	427
773	591
774	162
775	68
776	101
777	625
778	39
779	170
780	203
781	164
782	74
783	138
784	275
785	52
786	177
787	880
788	261
789	120
790	131
791	237
792	168
793	329
794	159
795	76
796	154
797	257
798	295
799	63
800	38
801	409
802	134
803	98
804	852
805	65
806	258
807	480
808	75
809	369
810	215
811	382
812	47
813	31
814	22
815	43
816	93
817	91
818	193
819	54
820	135
821	175
822	251
823	564
824	440
825	103
826	931
827	633
828	572
829	29
830	90
831	148
832	41
833	38
834	76
835	74
836	93
837	115
838	228
839	303
840	684
841	142
842	320
843	185
844	128
845	95
846	96
847	180
848	252
849	200
850	436
851	408
852	113
853	1192
854	363
855	135
856	106
857	676
858	114
859	40
860	19
861	53
862	327
863	1020
864	273
865	97
866	372
867	113
868	182
869	57
870	325
871	67
872	221
873	50
874	98
875	457
876	39
877	109
878	302
879	112
880	250
881	164
882	125
883	108
884	345
885	134
886	495
887	68
888	55
889	259
890	59
891	149
892	271
893	68
894	52
895	101
896	154
897	290
898	117
899	112
900	664
901	173
902	445
903	54
904	159
905	105
906	87
907	46
908	65
909	107
910	153
911	346
912	127
913	50
914	265
915	202
916	218
917	80
918	96
919	392
920	220
921	49
922	73
923	213
924	77
925	41
926	131
927	35
928	365
929	36
930	262
931	112
932	117
933	153
934	255
935	312
936	174
937	115
938	27
939	16
940	240
941	36
942	29
943	134
944	116
945	341
946	147
947	302
948	35
949	365
950	149
951	296
952	278
953	258
954	74
955	397
956	83
957	368
958	51
959	502
960	229
961	23
962	630
963	204
964	956
965	469
966	79
967	151
968	245
969	173
970	735
971	73
972	36
973	731
974	80
975	121
976	292
977	283
978	546
979	382
980	142
981	444
982	880
983	697
984	242
985	311
986	244
987	851
988	218
989	379
990	314
991	379
992	258
993	120
994	930
995	291
996	119
997	245
998	154
999	217
1000	199
1001	559
1002	193
1003	332
1004	79
1005	168
1006	244
1007	270
1008	255
1009	225
1010	50
1011	33
1012	73
1013	33
1014	254
1015	81
1016	273
1017	537
1018	109
1019	316
1020	64
1021	181
1022	112
1023	222
1024	408
1025	41
1026	262
1027	69
1028	730
1029	199
1030	807
1031	333
1032	455
1033	270
1034	220
1035	213
1036	143
1037	44
1038	289
1039	149
1040	98
1041	87
1042	225
1043	418
1044	42
1045	51
1046	248
1047	151
1048	82
1049	215
1050	220
1051	216
1052	635
1053	618
1054	266
1055	245
1056	444
1057	209
1058	167
1059	259
1060	330
1061	219
1062	159
1063	100
1064	277
1065	355
1066	151
1067	141
1068	447
1069	226
1070	652
1071	65
1072	247
1073	84
1074	1699
1075	360
1076	60
1077	383
1078	142
1079	43
1080	58
1081	1242
1082	55
1083	202
1084	166
1085	92
1086	100
1087	109
1088	409
1089	1319
1090	126
1091	188
1092	322
1093	58
1094	96
1095	1761
1096	122
1097	19
1098	88
1099	253
1100	190
1101	252
1102	758
1103	101
1104	69
1105	74
1106	132
1107	55
1108	209
1109	1114
1110	647
1111	90
1112	239
1113	766
1114	783
1115	200
1116	461
1117	89
1118	307
1119	393
1120	462
1121	262
1122	27
1123	482
1124	189
1125	463
1126	189
1127	734
1128	207
1129	21
1130	165
1131	38
1132	170
1133	21
1134	572
1135	38
1136	65
1137	89
1138	615
1139	229
1140	396
1141	1292
1142	2341
1143	939
1144	185
1145	114
1146	269
1147	249
1148	938
1149	303
1150	82
1151	132
1152	259
1153	130
1154	87
1155	611
1156	119
1157	173
1158	38
1159	110
1160	92
1161	123
1162	140
1163	67
1164	142
1165	122
1166	458
1167	1456
1168	860
1169	355
1170	181
1171	134
1172	160
1173	105
1174	144
1175	149
1176	155
1177	126
1178	243
1179	114
1180	414
1181	501
1182	896
1183	85
1184	150
1185	69
1186	797
1187	249
1188	193
1189	938
1190	92
1191	884
1192	74
1193	124
1194	578
1195	65
1196	682
1197	381
1198	289
1199	499
1200	66
1201	128
1202	496
1203	108
1204	396
1205	693
1206	35
1207	282
1208	113
1209	237
1210	103
1211	502
1212	540
1213	751
1214	1226
1215	117
1216	1311
1217	303
1218	351
1219	226
1220	385
1221	401
1222	113
1223	436
1224	555
1225	153
1226	176
1227	20
1228	114
1229	203
1230	162
1231	56
1232	32
1233	104
1234	352
1235	77
1236	114
1237	185
1238	109
1239	73
1240	87
1241	94
1242	46
1243	602
1244	179
1245	93
1246	108
1247	119
1248	93
1249	65
1250	147
1251	150
1252	169
1253	267
1254	481
1255	62
1256	219
1257	113
1258	142
1259	161
1260	213
1261	488
1262	69
1263	124
1264	392
1265	126
1266	199
1267	111
1268	132
1269	215
1270	164
1271	55
1272	351
1273	358
1274	203
1275	951
1276	277
1277	177
1278	470
1279	114
1280	237
1281	115
1282	142
1283	95
1284	66
1285	232
1286	416
1287	267
1288	467
1289	829
1290	1120
1291	274
1292	63
1293	95
1294	34
1295	112
1296	228
1297	922
1298	615
1299	883
1300	219
1301	216
1302	329
1303	84
1304	150
1305	109
1306	81
1307	130
1308	340
1309	59
1310	129
1311	181
1312	52
1313	129
1314	114
1315	208
1316	231
1317	287
1318	154
1319	1207
1320	267
1321	78
1322	254
1323	237
1324	755
1325	479
1326	318
1327	175
1328	214
1329	117
1330	114
1331	264
1332	67
1333	207
1334	182
1335	138
1336	99
1337	324
1338	313
1339	471
1340	844
1341	209
1342	531
1343	1916
1344	275
1345	193
1346	270
1347	322
1348	341
1349	1278
1350	152
1351	696
1352	1161
1353	1006
1354	1381
1355	522
1356	217
1357	527
1358	148
1359	182
1360	681
1361	179
1362	93
1363	58
1364	171
1365	109
1366	28
1367	69
1368	431
1369	378
1370	412
1371	325
1372	82
1373	227
1374	291
1375	111
1376	60
1377	188
1378	280
1379	309
1380	37
1381	420
1382	15
1383	616
1384	109
1385	40
1386	105
1387	109
1388	600
1389	1172
1390	132
1391	121
1392	175
1393	126
1394	128
1395	79
1396	158
1397	162
1398	207
1399	724
1400	841
1401	1575
1402	60
1403	35
1404	161
1405	131
1406	773
1407	1096
1408	583
1409	913
1410	85
1411	198
1412	1088
1413	1243
1414	562
1415	56
1416	123
1417	118
1418	293
1419	296
1420	115
1421	51
1422	206
1423	164
1424	87
1425	57
1426	41
1427	179
1428	105
1429	90
1430	152
1431	757
1432	85
1433	114
1434	170
1435	268
1436	179
1437	214
1438	75
1439	103
1440	91
1441	221
1442	63
1443	343
1444	488
1445	37
1446	137
1447	949
1448	1461
1449	1168
1450	245
1451	164
1452	154
1453	88
1454	142
1455	921
1456	915
1457	39
1458	1156
1459	1548
1460	1155
1461	2104
1462	282
1463	1973
1464	92
1465	454
1466	1426
1467	114
1468	128
1469	88
1470	27
1471	1090
1472	416
1473	183
1474	227
1475	323
1476	110
1477	83
1478	193
1479	516
1480	146
1481	148
1482	412
1483	1515
1484	679
1485	259
1486	290
1487	1000
1488	1322
1489	112
1490	415
1491	106
1492	142
1493	164
1494	346
1495	199
1496	970
1497	895
1498	816
1499	57
1500	125
1501	176
1502	303
1503	273
1504	449
1505	786
1506	86
1507	69
1508	128
1509	1060
1510	158
1511	265
1512	878
1513	391
1514	124
1515	300
1516	960
1517	272
1518	1233
1519	127
1520	103
1521	812
1522	1105
1523	638
1524	147
1525	175
1526	174
1527	182
1528	1489
1529	316
1530	1160
1531	277
1532	1287
1533	1427
1534	1028
1535	2294
1536	1716
1537	1602
1538	1231
1539	592
1540	1723
1541	1521
1542	1253
1543	867
1544	1229
1545	819
1546	384
1547	2028
1548	1037
1549	275
1550	228
1551	72
1552	55
1553	311
1554	123
1555	1043
1556	279
1557	66
1558	42
1559	194
1560	141
1561	121
1562	89
1563	202
1564	155
1565	153
1566	65
1567	48
1568	338
1569	112
1570	151
1571	204
1572	76
1573	461
1574	282
1575	63
1576	673
1577	75
1578	132
1579	67
1580	162
1581	157
1582	104
1583	60
1584	245
1585	886
1586	604
1587	871
1588	483
1589	237
1590	420
1591	57
1592	30
1593	892
1594	540
1595	910
1596	120
1597	72
1598	62
1599	146
1600	331
1601	128
1602	1270
1603	470
1604	122
1605	43
1606	273
1607	189
1608	169
1609	104
1610	243
1611	106
1612	309
1613	346
1614	387
1615	1292
1616	447
1617	148
1618	262
1619	1257
1620	994
1621	226
1622	433
1623	379
1624	185
1625	107
1626	235
1627	38
1628	75
1629	214
1630	34
1631	76
1632	487
1633	1086
1634	300
1635	817
1636	962
1637	106
1638	63
1639	942
1640	210
1641	531
1642	663
1643	298
1644	2075
1645	794
1646	535
1647	1916
1648	1957
1649	1342
1650	1848
1651	112
1652	88
1653	415
1654	1009
1655	1420
1656	60
1657	88
1658	1521
1659	964
1660	1843
1661	1387
1662	801
1663	1183
1664	1275
1665	1330
1666	2800
1667	2157
1668	560
1669	1727
1670	1036
1671	2203
1672	2534
1673	1285
1674	221
1675	2767
1676	2035
1677	948
1678	68
1679	366
1680	2250
1681	1005
1682	227
1683	3462
1684	1013
1685	913
1686	1322
1687	49
1688	700
1689	2201
1690	343
1691	1862
1692	1296
1693	1357
1694	716
1695	1150
1696	2412
1697	850
1698	816
1699	776
1700	1385
1701	577
1702	431
1703	1287
1704	1834
1705	1962
1706	81
1707	1408
1708	191
1709	890
1710	1042
1711	1246
1712	2690
1713	2757
1714	153
1715	1911
1716	337
1717	1381
1718	846
1719	1336
1720	1821
1721	1230
1722	2663
1723	2243
1724	3002
1725	1647
1726	2379
1727	1709
1728	1274
1729	2275
1730	2020
1731	2856
1732	712
1733	1890
1734	834
1735	53
1736	2110
1737	1134
1738	2264
1739	1483
1740	2292
1741	2215
1742	1165
1743	622
1744	938
1745	2219
1746	313
1747	2798
1748	1053
1749	373
1750	60
1751	441
1752	1125
1753	2464
1754	379
1755	87
1756	1719
1757	1480
1758	2392
1759	159
1760	1524
1761	1456
1762	916
1763	1739
1764	1193
1765	1303
1766	1549
1767	2822
1768	1096
1769	2594
1770	1942
1771	3451
1772	1296
1773	267
1774	360
1775	225
1776	54
1777	236
1778	192
1779	60
1780	114
1781	269
1782	275
1783	788
1784	34
1785	215
1786	139
1787	215
1788	534
1789	274
1790	2361
1791	2062
1792	1929
1793	1723
1794	1692
1795	1424
1796	2105
1797	1239
1798	2331
1799	1486
1800	150
1801	873
1802	447
1803	539
1804	493
1805	566
1806	260
1807	725
1808	93
1809	114
1810	177
1811	19
1812	51
1813	287
1814	63
1815	156
1816	324
1817	54
1818	196
1819	89
1820	47
1821	1035
1822	123
1823	123
1824	1591
1825	91
1826	107
1827	585
1828	924
1829	403
1830	842
1831	301
1832	1539
1833	106
1834	327
1835	105
1836	1724
1837	1321
1838	784
1839	1551
1840	1641
1841	251
1842	739
1843	988
1844	178
1845	376
1846	1444
1847	2761
1848	1590
1849	3208
1850	1397
1851	2314
1852	2234
1853	2066
1854	522
1855	403
1856	1646
1857	1648
1858	1998
1859	1541
1860	1464
1861	1659
1862	1487
1863	2142
1864	82
1865	1181
1866	1670
1867	2678
1868	1873
1869	2452
1870	1440
1871	1100
1872	343
1873	81
1874	1393
1875	2519
1876	1989
1877	2393
1878	88
1879	78
1880	173
1881	763
1882	81
1883	185
1884	52
1885	801
1886	359
1887	494
1888	1086
1889	1200
1890	180
1891	584
1892	586
1893	629
1894	813
1895	386
1896	339
1897	1244
1898	1511
1899	237
1900	98
1901	184
1902	1474
1903	1521
1904	202
1905	1730
1906	1031
1907	241
1908	1744
1909	63
1910	147
1911	1712
1912	1304
1913	679
1914	818
1915	324
1916	174
1917	391
1918	186
1919	116
1920	158
1921	270
1922	133
1923	1128
1924	974
1925	546
1926	1703
1927	303
1928	1693
1929	1264
1930	1636
1931	1213
1932	112
1933	1934
1934	1848
1935	1006
1936	128
1937	158
1938	1463
1939	101
1940	1004
1941	1505
1942	1457
1943	2058
1944	1543
1945	2122
1946	615
1947	547
1948	2034
1949	1043
1950	97
1951	196
1952	166
1953	408
1954	622
1955	95
1956	175
1957	56
1958	1521
1959	488
1960	46
1961	564
1962	212
1963	382
1964	190
1965	139
1966	418
1967	289
1968	48
1969	140
1970	134
1971	110
1972	1637
1973	1680
1974	1927
1975	251
1976	1360
1977	2186
1978	90
1979	103
1980	271
1981	679
1982	1359
1983	2552
1984	2538
1985	3137
1986	607
1987	203
1988	453
1989	2154
1990	1761
1991	3818
1992	947
1993	744
1994	420
1995	599
1996	2497
1997	1403
[truncated: 2,535 more rows]

## Sheet: Ctrl1_112819
Dll4f/f		30d after tmx_injure muscle_14d regeneration
Ctrl 1_112819
	CSA (μm2)
1	840
2	985
3	1264
4	705
5	1349
6	1856
7	1467
8	910
9	4030
10	1618
11	1216
12	2669
13	756
14	623
15	1288
16	3084
17	2859
18	1507
19	1322
20	713
21	2681
22	4487
23	797
24	651
25	1041
26	2229
27	2597
28	714
29	2054
30	2762
31	2513
32	1542
33	3508
34	2577
35	2767
36	1649
37	2829
38	2514
39	728
40	3092
41	2355
42	2022
43	1720
44	2967
45	2717
46	2633
47	2750
48	1658
49	2943
50	2775
51	1536
52	2786
53	2572
54	2769
55	2395
56	1217
57	921
58	703
59	4049
60	1817
61	2086
62	1295
63	3792
64	3035
65	585
66	2731
67	701
68	1056
69	537
70	1009
71	2884
72	2200
73	1948
74	3093
75	1244
76	752
77	717
78	1260
79	1882
80	2387
81	1220
82	1514
83	2630
84	1648
85	1311
86	3167
87	2141
88	2677
89	618
90	1210
91	704
92	3430
93	2791
94	1292
95	2410
96	957
97	3226
98	559
99	1578
100	680
101	2705
102	2498
103	2527
104	3032
105	2859
106	1786
107	2870
108	653
109	1215
110	570
111	1507
112	1476
113	412
114	1375
115	2445
116	2523
117	562
118	934
119	781
120	792
121	424
122	3025
123	1656
124	622
125	1494
126	619
127	453
128	687
129	824
130	474
131	1838
132	726
133	2165
134	1316
135	2380
136	959
137	936
138	1000
139	3783
140	797
141	1148
142	1241
143	1175
144	2848
145	1494
146	622
147	1291
148	682
149	741
150	448
151	539
152	2611
153	1058
154	971
155	2139
156	1502
157	2722
158	811
159	1681
160	779
161	3195
162	1978
163	854
164	525
165	1239
166	2031
167	760
168	2557
169	677
170	2055
171	2731
172	710
173	1398
174	1249
175	884
176	363
177	536
178	2414
179	898
180	1274
181	3086
182	934
183	1603
184	677
185	478
186	1284
187	3137
188	1382
189	1509
190	1158
191	974
192	1064
193	2923
194	1797
195	2117
196	671
197	945
198	1766
199	1896
200	2345
201	2424
202	676
203	2298
204	866
205	1922
206	2434
207	2605
208	2049
209	1174
210	614
211	2508
212	2314
213	560
214	940
215	638
216	1779
217	2874
218	1965
219	678
220	1480
221	2459
222	802
223	1057
224	614
225	3055
226	789
227	1483
228	1043
229	1745
230	2723
231	2265
232	603
233	2543
234	1397
235	960
236	1465
237	868
238	976
239	1076
240	738
241	1017
242	692
243	2630
244	1384
245	763
246	2614
247	540
248	1537
249	2657
250	822
251	2076
252	565
253	1278
254	504
255	830
256	1644
257	743
258	3525
259	1319
260	972
261	1559
262	1908
263	455
264	2261
265	1429
266	1314
267	1678
268	1197
269	577
270	875
271	719
272	1423
273	621
274	1859
275	806
276	1120
277	2251
278	419
279	595
280	1041
281	1082
282	2098
283	1553
284	817
285	1949
286	1927
287	1831
288	2641
289	1100
290	1209
291	1475
292	558
293	1742
294	2045
295	1050
296	1180
297	2173
298	2330
299	3441
300	550
301	638
302	2140
303	403
304	614
305	1208
306	617
307	2895
308	1559
309	627
310	465
311	1703
312	2496
313	1474
314	680
315	1325
316	2273
317	2743
318	867
319	1003
320	1059
321	1890
322	534
323	2249
324	1858
325	602
326	557
327	3197
328	804
329	958
330	1233
331	853
332	1586
333	686
334	2878
335	2523
336	468
337	2387
338	714
339	929
340	2847
341	3822
342	940
343	877
344	1195
345	1717
346	991
347	1300
348	559
349	415
350	980
351	2664
352	527
353	543
354	642
355	1928
356	458
357	578
358	875
359	3014
360	872
361	1687
362	3207
363	978
364	493
365	1887
366	2804
367	1685
368	1122
369	1633
370	615
371	670
372	428
373	359
374	433
375	229
376	179
377	184
378	414
379	373
380	326
381	361
382	371
383	418
384	322
385	365
386	346
387	526
388	430
389	504
390	293
391	335
392	262
393	225
394	144
395	447
396	314
397	583
398	409
399	215
400	646
401	115
402	478
403	406
404	260
405	289
406	108
407	312
408	149
409	189
410	699
411	354
412	166
413	335
414	347
415	495
416	537
417	529
418	222
419	81
420	722
421	378
422	414
423	128
424	305
425	530
426	746
427	57
428	133
429	204
430	253
431	170
432	158
433	137
434	306
435	81
436	587
437	942
438	132
439	286
440	490
441	319
442	546
443	218
444	345
445	353
446	213
447	609
448	729
449	207
450	170
451	158
452	467
453	476
454	461
455	793
456	171
457	174
458	162
459	370
460	390
461	805
462	116
463	239
464	688
465	710
466	345
467	262
468	336
469	543
470	591
471	418
472	144
473	101
474	321
475	614
476	589
477	207
478	166
479	673
480	162
481	386
482	1024
483	104
484	972
485	432
486	104
487	616
488	269
489	83
490	442
491	1048
492	1211
493	288
494	600
495	290
496	222
497	357
498	332
499	243
500	360
501	264
502	272
503	139
504	130
505	457
506	562
507	179
508	466
509	572
510	441
511	483
512	478
513	286
514	248
515	385
516	232
517	800
518	156
519	183
520	529
521	435
522	212
523	215
524	151
525	168
526	196
527	409
528	292
529	510
530	296
531	182
532	480
533	321
534	147
535	369
536	115
537	292
538	384
539	377
540	378
541	846
542	323
543	172
544	275
545	489
546	398
547	277
548	121
549	90
550	295
551	110
552	341
553	244
554	138
555	207
556	349
557	571
558	309
559	422
560	1164
561	417
562	423
563	311
564	359
565	698
566	573
567	94
568	107
569	235
570	436
571	731
572	212
1	149
2	217
3	118
4	449
5	242
6	549
7	100
8	238
9	361
10	238
11	96
12	162
13	89
14	108
15	136
16	69
17	57
18	221
19	98
20	221
21	183
22	71
23	83
24	166
25	202
26	263
27	258
28	123
29	85
30	55
31	134
32	158
33	150
34	325
35	277
36	491
37	317
38	277
39	146
40	221
41	261
42	78
43	152
44	102
45	279
46	122
47	181
48	316
49	114
50	214
51	192
52	114
53	101
54	213
55	158
56	334
57	170
58	169
59	202
60	211
61	169
62	176
63	221
64	207
65	220
66	210
67	224
68	95
69	116
70	240
71	229
72	159
73	243
74	107
75	191
76	245
77	335
78	396
79	173
80	135
81	364
82	203
83	205
84	89
85	150
86	123
87	216
88	135
89	268
90	215
91	228
92	337
93	137
94	191
95	245
96	274
97	358
98	457
99	73
100	146
101	455
102	342
103	126
104	161
105	190
106	194
107	128
108	255
109	112
110	674
111	199
112	229
113	246
114	86
115	119
116	179
117	170
118	241
119	138
120	181
121	90
122	241
123	233
124	168
125	355
126	371
127	282
128	144
129	132
130	166
131	407
132	117
133	181
134	207
135	213
136	229
137	275
138	192
139	374
140	169
141	632
142	340
143	598
144	236
145	267
146	161
147	357
148	121
149	202
150	137
151	210
152	132
153	379
154	218
155	174
156	258
157	157
158	395
159	310
160	303
161	153
162	113
163	407
164	283
165	175
166	353
167	344
168	274
169	207
170	79
171	154
172	325
173	628
174	400
175	244
176	234
177	158
178	198
179	197
180	224
181	127
182	89
183	258
184	270
185	424
186	411
187	229
188	196
189	233
190	189
191	496
192	304
193	199
194	203
195	245
196	139
197	515
198	173
199	426
200	257
201	310
202	207
203	204
204	94
205	264
206	324
207	123
208	289
209	304
210	337
211	135
212	237
213	414
214	341
215	321
216	279
217	318
218	612
219	156
220	349
221	153
222	262
223	121
224	153
225	222
226	214
227	140
228	336
229	193
230	302
231	502
232	476
233	315
234	201
235	379
236	250
237	268
238	313
239	265
240	324
241	240
242	108
243	88
244	197
245	92
246	120
247	317
248	251
249	357
250	278
251	202
252	578
253	184
254	404
255	162
256	433
257	211
258	283
259	80
260	195
261	140
262	780
263	521
264	776
265	300
266	267
267	259
268	418
269	291
270	168
271	376
272	266
273	113
274	341
275	462
276	2195
277	1342
278	2020
279	1303
280	1542
281	753
282	1991
283	1151
284	1093
285	2605
286	1870
287	1096
288	1248
289	4012
290	1753
291	1192
292	2602
293	2163
294	713
295	2464
296	2058
297	2264
298	876
299	1562
300	1402
301	3124
302	2633
303	957
304	1749
305	1084
306	2764
307	2612
308	2969
309	959
310	1133
311	1731
312	1772
313	1695
314	807
315	2599
316	1435
317	2001
318	1061
319	1933
320	1109
321	2048
322	2430
323	1856
324	1110
325	478
326	1627
327	748
328	1264
329	1641
330	1999
331	1337
332	1267
333	1153
334	1876
335	2075
336	2216
337	859
338	2358
339	427
340	906
341	2181
342	1463
343	1687
344	1901
345	1058
346	1266
347	3004
348	817
349	1234
350	641
351	913
352	1534
353	2438
354	1854
355	737
356	1485
357	792
358	802
359	1759
360	3479
361	3159
362	1772
363	1133
364	2848
365	1131
366	2665
367	970
368	675
369	1764
370	2840
371	2139
372	1616
373	848
374	2812
375	838
376	749
377	1542
378	1885
379	1891
380	3456
381	1920
382	1821
383	1231
384	2129
385	1617
386	425
387	1383
388	478
389	1475
390	716
391	900
392	200
393	228
394	289
395	592
396	328
397	272
398	250
399	387
400	867
401	337
402	485
403	325
404	292
405	408
406	140
407	167
408	381
409	508
410	317
411	496
412	319
413	335
414	238
415	1015
416	288
417	339
418	278
419	608
420	372
421	543
422	455
423	289
424	224
425	479
426	586
427	398
428	170
429	138
1	746
2	184
3	109
4	393
5	431
6	217
7	414
8	238
9	218
10	165
11	199
12	275
13	330
14	340
15	203
16	238
17	161
18	408
19	108
20	100
21	388
22	140
23	154
24	206
25	284
26	114
27	232
28	195
29	328
30	388
31	119
32	259
33	100
34	145
35	109
36	116
37	168
38	259
39	287
40	126
41	237
42	247
43	218
44	123
45	512
46	224
47	333
48	558
49	471
50	706
51	215
52	441
53	288
54	161
55	436
56	256
57	475
58	195
59	772
60	435
61	343
62	224
63	155
64	92
65	194
66	89
67	193
68	286
69	295
70	196
71	370
72	155
73	253
74	212
75	241
76	166
77	191
78	116
79	263
80	512
81	219
82	162
83	449
84	183
85	188
86	277
87	112
88	198
89	323
90	482
91	82
92	134
93	161
94	602
95	294
96	237
97	404
98	212
99	403
100	267
101	226
102	356
103	369
104	400
105	118
106	478
107	204
108	260
109	224
110	244
111	218
112	164
113	68
114	140
115	238
116	127
117	291
118	134
119	98
120	182
121	472
122	298
123	398
124	105
125	263
126	250
127	139
128	158
129	376
130	202
131	365
132	220
133	169
134	330
135	331
136	496
137	772
138	245
139	202
140	112
141	354
142	128
143	92
144	231
145	305
146	400
147	226
148	169
149	164
150	223
151	209
152	234
153	219
154	251
155	88
156	283
157	75
158	153
159	156
160	260
161	74
162	46
163	361
164	504
165	147
166	225
167	171
168	147
169	197
170	210
171	504
172	306
173	352
174	194
175	339
176	134
177	466
178	444
179	151
180	261
1	3128
2	1454
3	2248
4	1235
5	1636
6	2589
7	1769
8	4211
9	460
10	2827
11	688
12	3087
13	2097
14	656
15	678
16	1706
17	3109
18	1222
19	2857
20	2565
21	3670
22	1460
23	2301
24	900
25	516
26	3913
27	1552
28	1873
29	1420
30	878
31	1360
32	2573
33	2107
34	2316
35	2248
36	691
37	1183
38	744
39	3344
40	1811
41	3369
42	4250
43	936
44	3155
45	3484
46	3545
47	2564
48	2584
49	2956
50	3072
51	1482
52	1254
53	2900
54	1804
55	1141
56	1392
57	4304
58	2541
59	959
60	2287
61	1900
62	1823
63	4007
64	1794
65	1804
66	2643
67	1194
68	1445
69	2721
70	1448
71	1226
72	2136
73	4490
74	2063
75	3627
76	788
77	1592
78	3794
79	1078
80	2160
81	1169
82	2049
83	3659
84	621
85	1944
86	1133
87	3325
88	1401
89	1528
90	1917
91	1286
92	4424
93	2161
94	1991
95	1327
96	2759
97	1851
98	3152
99	1705
100	1916
101	2632
102	5252
103	2843
104	1505
105	803
106	2584
107	770
108	2322
109	3025
110	1243
111	1901
112	1194
113	1066
114	2441
115	3255
116	2130
117	2555
118	1356
119	1641
120	2322
121	3615
122	1367
123	5558
124	1016
125	1769
126	1848
127	593
128	2362
129	1461
130	1262
131	2568
132	1145
133	1200
134	3159
135	1921
136	2274
137	2800
138	1624
139	2588
140	1459
141	2058
142	2092
143	1269
144	2441
145	3073
146	4104
147	580
148	1483
149	1818
150	2935
151	1800
152	2868
153	2485
154	775
155	1564
156	705
157	1924
158	2138
159	2210
160	1605
161	3874
162	2985
163	1965
164	3343
165	2079
166	1187
167	2684
168	1674
169	522
170	1091
171	2253
172	1374
173	1445
174	1215
175	4533
176	1450
177	3920
178	1248
179	3362
180	1267
181	1976
182	1550
183	1499
184	1065
185	1923
186	2877
187	2962
188	1466
189	880
190	3412
191	1438
192	2325
193	4290
194	1864
195	3235
196	3025
197	954
198	1906
199	2001
200	905
201	2379
202	3955
203	2036
204	2140
205	558
206	3615
207	1543
208	2493
209	3019
210	2616
211	932
212	1421
213	2588
214	2442
215	1640
216	1363
217	2777
218	1271
219	1876
220	4181
221	731
222	1659
223	1159
224	3090
225	835
226	1654
227	2797
228	3328
229	3776
230	875
231	724
232	1754
233	2454
234	2630
235	1605
236	825
237	3141
238	2863
239	1941
240	1081
241	3519
242	1044
243	2120
244	2997
245	2666
246	2159
247	3314
248	3351
249	2649
250	977
251	2119
252	3538
253	1968
254	1780
255	1859
256	1962
257	2768
258	3565
259	2969
260	1049
261	1505
262	3132
263	2192
264	3142
265	2284
266	2075
267	3256
268	1583
269	3548
270	2673
271	1295
272	1064
273	843
274	1350
275	2929
276	3418
277	1938
278	1197
279	2026
280	1371
281	1590
282	1390
283	2892
284	2437
285	1838
286	2333
287	3698
288	1393
289	2913
290	2161
291	1557
292	2139
293	3011
294	1300
295	2121
296	2110
297	2736
298	3711
299	2829
300	1600
301	2841
302	2252
303	3536
304	1659
305	4099
306	2552
307	1357
308	2111
309	1034
310	2211
311	1486
312	3159
313	1220
314	1654
315	943
316	2033
317	1156
318	1525
319	3425
320	977
321	2678
322	2132
323	1459
324	2797
325	579
326	3424
327	1950
328	1909
329	2649
330	1695
331	1054
332	794
333	2720
334	1091
335	2459
336	4037
337	2378
338	2362
339	2720
340	2361
341	1570
342	1614
343	1005
344	3443
345	874
346	3040
347	1054
348	1271
349	1600
350	1842
351	2042
352	1794
353	3658
354	1712
355	1651
356	3154
357	3141
358	1650
359	1420
360	1975
361	2282
362	3321
363	2838
364	1741
365	2820
366	1476
367	985
368	4153
369	953
370	1015
371	2617
372	2419
373	717
374	901
375	1389
376	593
377	1855
378	3594
379	2315
380	1328
381	1101
382	2383
383	1538
384	3445
385	1296
386	2440
387	1807
388	1913
389	2178
390	2638
391	2665
392	2564
393	641
394	2553
395	1187
396	4209
397	3128
398	838
399	1280
400	1880
401	4195
402	3884
403	2174
404	1668
405	2458
406	1716
407	1682
408	4216
409	3241
410	894
411	3352
412	1899
413	2266
414	3004
415	1075
416	2677
417	745
418	1169
419	1785
420	1531
421	2577
422	2167
423	1396
424	1669
425	511
426	4029
427	3947
428	1794
429	1416
430	750
431	2702
432	2332
433	1799
434	2748
435	3212
436	558
437	2447
438	968
439	4308
440	1369
441	1673
442	3402
443	902
444	938
445	1044
446	722
447	730
448	1625
449	624
450	2024
451	1082
452	885
453	2680
454	4040
455	2464
456	2723
457	1187
458	2023
459	2112
460	1610
461	1044
462	2641
463	2204
464	3459
465	2868
466	4327
467	4409
468	3646
469	2612
470	2038
471	4263
472	3055
473	3867
474	1489
475	748
476	1941
477	1350
478	1061
479	3407
480	3412
481	838
482	1211
483	3690
484	3646
485	3024
486	1436
487	2467
488	2162
489	1993
490	2132
491	2429
492	2115
493	2604
494	1955
495	1048
496	1021
497	1073
498	747
499	1643
500	822
501	984
502	728
503	294
504	537
505	1709
506	1930
507	677
508	463
509	3839
510	4768
511	533
512	433
513	139
514	356
515	513
516	397
517	186
518	774
519	629
520	679
521	2006
1	3005
2	931
3	3016
4	1033
5	1614
6	1968
7	1163
8	1364
9	1407
10	2649
11	3355
12	1428
13	889
14	1440
15	687
16	628
17	1219
18	871
19	1847
20	1447
21	928
22	1004
23	3308
24	1049
25	1512
26	1773
27	695
28	1839
29	1641
30	1222
31	432
32	583
33	1349
34	1798
35	2340
36	1467
37	518
38	729
39	1703
40	587
41	2516
42	912
43	437
44	474
45	1487
46	1480
47	1224
48	913
49	836
50	2036
51	965
52	2167
53	560
54	1226
55	1448
56	557
57	1647
58	1803
59	1687
60	912
61	659
62	1191
63	2895
64	2822
65	1256
66	1379
67	1257
68	985
69	916
70	986
71	944
72	1436
73	1609
74	2147
75	657
76	560
77	808
78	1761
79	1439
80	1468
81	1199
82	804
83	1365
84	832
85	1520
86	2286
87	1894
88	1388
89	1469
90	2250
91	1826
92	1044
93	1530
94	1971
95	1816
96	1116
97	1442
98	1671
99	1282
100	848
101	1129
102	1844
103	1941
104	1085
105	2199
106	1846
107	2017
108	2028
109	1410
110	2843
111	1954
112	1466
113	1350
114	1219
115	1612
116	1433
117	1379
118	1241
119	1685
120	1577
121	1853
122	2961
123	973
124	2084
125	3386
126	2965
127	1447
128	725
129	989
130	864
131	2096
132	760
133	2265
134	1665
135	1211
136	1228
137	774
138	1562
139	1613
140	1359
141	1398
142	551
143	754
144	1170
145	603
146	1715
147	2116
148	1211
149	1345
150	687
151	566
152	753
153	2141
154	1070
155	1748
156	1139
157	682
158	2006
159	649
160	1085
161	687
162	1285
163	670
164	673
165	1737
166	2494
167	1921
168	914
169	1252
170	667
171	3237
172	1198
173	755
174	2577
175	794
176	875
177	925
178	1687
179	1652
180	1367
181	1456
182	1466
183	1167
184	1169
185	709
186	1044
187	2309
188	893
189	1111
190	1878
191	3212
192	909
193	587
194	734
195	1137
196	1837
197	2463
198	957
199	1578
200	1791
201	3386
202	869
203	776
204	965
205	1976
206	1553
207	875
208	1096
209	1554
210	1589
211	1334
212	1003
213	1168
214	918
215	2915
216	1374
217	1055
218	433
219	1695
220	1215
221	1885
222	915
223	2096
224	1661
225	2102
226	553
227	1756
228	1156
229	3133
230	974
231	2466
232	1374
233	507
234	1332
235	1739
236	460
237	1774
238	1493
239	1172
240	2363
241	1843
242	924
243	1202
244	597
245	526
246	1512
247	1013
248	586
249	919
250	999
251	766
252	977
253	984
254	1194
255	898
256	2020
257	1104
258	1286
259	1039
260	1453
261	2675
262	1896
263	2391
264	946
265	591
266	765
267	1698
268	2262
269	1637
270	1652
271	1972
272	1036
273	1355
274	872
275	2560
276	2019
277	1514
278	2537
279	1372
280	875
281	2147
282	1483
283	1982
284	1265
285	1444
286	2248
287	847
288	1001
289	3345
290	1938
291	1813
292	666
293	3028
294	3366
295	3739
[truncated: 480 more rows]

## Sheet: Ctrl9_112819
Dll4f/f		30d after tmx_injure muscle_14d regeneration
Ctrl 9_112819
	CSA (μm2)
1	1799
2	1101
3	2243
4	2254
5	613
6	1157
7	779
8	2601
9	831
10	1118
11	1413
12	737
13	633
14	674
15	2093
16	1847
17	608
18	938
19	826
20	2243
21	1356
22	551
23	2175
24	2665
25	2914
26	2315
27	756
28	1231
29	2314
30	1806
31	2723
32	1276
33	1617
34	2133
35	897
36	2371
37	1261
38	1585
39	1725
40	590
41	2750
42	1386
43	2558
44	1672
45	3097
46	1321
47	1134
48	1027
49	1543
50	989
51	2496
52	2062
53	918
54	1585
55	843
56	1153
57	691
58	1461
59	2043
60	1892
61	1409
62	3609
63	1750
64	1221
65	656
66	1017
67	1761
68	1034
69	1770
70	1351
71	1143
72	693
73	2140
74	2548
75	1920
76	2084
77	1079
78	1014
79	1242
80	2653
81	3855
82	939
83	1917
84	873
85	2394
86	740
87	2407
88	933
89	3002
90	1135
91	1223
92	1798
93	1596
94	1208
95	2144
96	1020
97	1010
98	1107
99	2268
100	2051
101	1815
102	1192
103	1304
104	2772
105	1937
106	1271
107	743
108	1125
109	2290
110	1343
111	3751
112	832
113	2093
114	1818
115	1198
116	1601
117	2398
118	683
119	842
120	1559
121	1815
122	2659
123	930
124	1999
125	2435
126	2837
127	759
128	2960
129	1633
130	2384
131	1165
132	1901
133	816
134	1785
135	1178
136	1796
137	1798
138	905
139	2913
140	890
141	2564
142	1463
143	1188
144	3217
145	979
146	1785
147	2159
148	1356
149	1872
150	960
151	2186
152	955
153	1875
154	2928
155	1299
156	1309
157	1526
158	838
159	1315
160	2030
161	1145
162	2050
163	1685
164	1273
165	915
166	1418
167	2496
168	1595
169	412
170	1864
171	1367
172	2142
173	1777
174	1134
175	2628
176	969
177	1816
178	765
179	1825
180	2298
181	1737
182	1388
183	1312
184	1180
185	1150
186	1312
187	2077
188	1088
189	1347
190	1863
191	1426
192	1940
193	1716
194	1722
195	2321
196	1641
197	1652
198	1573
199	2938
200	1590
201	1731
202	1593
203	1640
204	845
205	1978
206	3644
207	1200
208	1641
209	1810
210	791
211	2748
212	1231
213	917
214	1213
215	1543
216	1536
217	811
218	1616
219	1172
220	1431
221	1093
222	1733
223	1525
224	2222
225	1155
226	1979
227	1346
228	1792
229	1339
230	1189
231	1358
232	1191
233	1688
234	1671
235	3549
236	546
237	2600
238	2489
239	1636
240	569
241	1442
242	1130
243	1447
244	1480
245	1959
246	1603
247	889
248	886
249	608
250	1941
251	1166
252	809
253	576
254	2739
255	2157
256	2502
257	1876
258	1676
259	1766
260	954
261	3182
262	1915
263	1285
264	711
265	1055
266	1329
267	2407
268	1539
269	891
270	942
271	577
272	1257
273	800
274	741
275	1559
276	480
277	2441
278	1789
279	965
280	2208
281	1019
282	1006
283	1150
284	1670
285	1731
286	1674
287	1145
288	2256
289	1866
290	2429
291	844
292	641
293	2516
294	1655
295	987
296	1442
297	1401
298	1303
299	1201
300	1722
301	660
302	2453
303	2167
304	976
305	1742
306	1606
307	1519
308	1266
309	2223
310	679
311	1527
312	716
313	1439
314	1802
315	1290
316	1126
317	2390
318	1609
319	1626
320	1285
321	756
322	2302
323	1464
324	1455
325	1117
326	2158
327	1399
328	1135
329	1643
330	1919
331	1056
332	1576
333	1531
334	1432
335	2210
336	2241
337	1812
338	2093
339	892
340	2466
341	946
342	1135
343	1384
344	3062
345	1683
346	834
347	2238
348	553
349	1635
350	1942
351	1663
352	1554
353	1035
354	2124
355	1616
356	873
357	804
358	1188
359	981
360	938
361	719
362	1157
363	714
364	2579
365	2800
366	1047
367	1516
368	856
369	2008
370	2582
371	554
372	812
373	831
374	2380
375	918
376	1705
377	1850
378	2475
379	1019
380	1303
381	1363
382	604
383	1137
384	1661
385	1530
386	984
387	773
388	1161
389	787
390	2940
391	2696
392	2205
393	1521
394	1814
395	1429
396	2196
397	1374
398	1288
399	1175
400	1848
401	1659
402	1690
403	1123
404	633
405	1935
406	1155
407	2238
408	1387
409	1449
410	2287
411	906
412	1134
413	1044
414	1378
415	616
416	894
417	1047
418	880
419	990
420	1769
421	885
422	2395
423	2009
424	2392
425	1679
426	2755
427	1868
428	1382
429	1911
430	1904
431	1667
432	1116
433	1605
434	900
435	833
436	739
437	2121
438	806
439	1119
440	1036
441	1130
442	1519
443	1243
444	1221
445	1067
446	981
447	1106
448	2029
449	991
450	962
451	1125
452	1686
453	734
454	1695
455	2042
456	1473
457	999
458	1002
459	1079
460	1699
461	2044
462	932
463	2718
464	1580
465	1750
466	966
467	1003
468	1172
469	1057
470	1286
471	880
472	1188
473	1163
474	989
475	1759
476	1736
477	2337
478	972
479	598
480	736
481	1469
482	1483
483	1063
484	1929
485	845
486	731
487	984
488	2211
489	1565
490	2069
491	1255
492	844
493	811
494	1505
495	1148
496	949
497	1697
498	2325
499	1158
500	2059
501	565
502	725
503	1472
504	1412
505	2333
506	1901
507	1526
508	504
509	1150
510	598
511	1200
512	1644
513	919
514	946
515	1767
516	1120
517	2181
518	2404
519	1087
520	1507
521	632
522	646
523	2165
524	1597
525	765
526	1963
527	1116
528	1613
529	608
530	957
531	902
532	864
533	472
534	803
535	482
536	525
537	419
538	762
539	346
540	1131
541	363
542	452
543	664
544	1445
545	1079
546	529
547	589
548	518
549	736
550	597
551	1157
552	1309
553	832
554	961
555	565
556	1722
557	1866
558	672
559	2398
560	2092
561	1027
562	489
563	1149
564	927
565	920
566	464
567	1105
568	516
569	314
570	428
571	532
572	340
573	386
574	334
575	448
576	222
577	662
578	1286
579	503
580	339
581	2451
582	444
583	486
584	1012
585	1939
586	756
587	623
588	589
589	372
590	438
591	406
592	659
593	535
594	537
595	387
596	866
597	461
598	362
599	649
600	373
601	509
602	231
	Area
1	1589
2	1989
3	1644
4	1027
5	1088
6	1711
7	1755
8	940
9	1273
10	1361
11	604
12	510
13	2138
14	967
15	3056
16	1993
17	2069
18	497
19	1076
20	1656
21	1659
22	2070
23	1041
24	978
25	1232
26	575
27	945
28	931
29	689
30	1710
31	506
32	971
33	613
34	1227
35	439
36	2031
37	2466
38	977
39	1176
40	958
41	1117
42	1230
43	2232
44	1296
45	1179
46	1224
47	1085
48	1350
49	433
50	468
51	2354
52	2635
53	1458
54	499
55	2567
56	1157
57	1063
58	1937
59	1170
60	921
61	472
62	474
63	2202
64	1748
65	621
66	1144
67	1134
68	722
69	1356
70	1915
71	1731
72	697
73	410
74	1803
75	1090
76	491
77	419
78	743
79	1424
80	1456
81	602
82	1273
83	993
84	1145
85	1735
86	550
87	1789
88	1174
89	995
90	580
91	601
92	2069
93	1009
94	905
95	1495
96	2532
97	787
98	2594
99	642
100	566
101	668
102	446
103	1823
104	2214
105	657
106	1265
107	670
108	646
109	621
110	1062
111	720
112	2772
113	601
114	684
115	1263
116	535
117	780
118	1249
119	665
120	902
121	1377
122	1430
123	793
124	1377
125	576
126	705
127	2895
128	780
129	558
130	1966
131	1104
132	528
133	1765
134	1107
135	1102
136	878
137	974
138	900
139	947
140	1016
141	661
142	1623
143	746
144	992
145	1248
146	804
147	1859
148	675
149	519
150	903
151	667
152	1066
153	681
154	628
155	1788
156	1214
157	1235
158	510
159	1216
160	1271
161	962
162	504
163	1266
164	542
165	436
166	770
167	1450
168	706
169	1698
170	617
171	2865
172	1060
173	712
174	539
175	881
176	735
177	909
178	1038
179	766
180	877
181	1345
182	688
183	1916
184	2324
185	734
186	1776
187	948
188	816
189	2570
190	706
191	621
192	683
193	874
194	1804
195	605
196	685
197	1441
198	501
199	747
200	1043
201	1481
202	879
203	2521
204	684
205	1288
206	2193
207	852
208	834
209	1100
210	560
211	1435
212	1375
213	1087
214	1059
215	1400
216	1907
217	1254
218	1843
219	1458
220	571
221	829
222	1546
223	1291
224	857
225	799
226	833
227	534
228	1098
229	907
230	1397
231	1033
232	958
233	1343
234	584
235	1086
236	1104
237	593
238	762
239	742
240	1080
241	774
242	1352
243	2097
244	826
245	2495
246	1520
247	643
248	845
249	1060
250	1247
251	2873
252	774
253	878
254	2773
255	566
256	1292
257	1957
258	849
259	733
260	1308
261	752
262	2306
263	584
264	576
265	2069
266	672
267	582
268	828
269	719
270	1823
271	890
272	581
273	1408
274	667
275	1670
276	2425
277	865
278	1385
279	877
280	473
281	726
282	1719
283	887
284	467
285	1706
286	1304
287	619
288	668
289	1185
290	531
291	474
292	565
293	760
294	958
295	710
296	772
297	562
298	698
299	1928
300	750
301	923
302	496
303	514
304	810
305	767
306	582
307	924
308	760
309	1316
310	1265
311	736
312	1130
313	853
314	820
315	407
316	1295
317	836
318	733
319	1109
320	1223
321	1041
322	938
323	537
324	1088
325	1238
326	740
327	692
328	1390
329	525
330	676
331	1074
332	1538
333	1079
334	579
335	536
336	1597
337	1570
338	900
339	1611
340	486
341	3156
342	1077
343	1082
344	733
345	1614
346	577
347	1817
348	803
349	959
350	1328
351	1460
352	1130
353	1030
354	648
355	960
356	1362
357	673
358	1008
359	1342
360	1725
361	1185
362	2467
363	843
364	1686
365	1027
366	1348
367	1492
368	541
369	672
370	550
371	1082
372	857
373	644
374	1009
375	698
376	1784
377	1238
378	1537
379	1126
380	1211
381	1173
382	851
383	2227
384	1133
385	2381
386	517
387	602
388	664
389	951
390	1141
391	719
392	1626
393	831
394	656
395	1131
396	1170
397	806
398	1344
399	907
400	1097
401	453
402	572
403	826
404	1224
405	555
406	1371
407	1534
408	2146
409	1705
410	1736
411	641
412	849
413	1294
414	1024
415	1810
416	757
417	1238
418	2381
419	1410
420	673
421	734
422	1448
423	703
424	868
425	726
426	870
427	1148
428	660
429	711
430	1089
431	904
432	1742
433	757
434	1022
435	1278
436	1341
437	2000
438	780
439	648
440	1918
441	965
442	1780
443	900
444	439
445	619
446	787
447	1104
448	459
449	967
450	1365
451	1029
452	1280
453	622
454	868
455	1281
456	493
457	1174
458	738
459	976
460	1656
461	1196
462	636
463	1313
464	995
465	664
466	654
467	859
468	245
469	199
470	354
471	913
472	161
473	200
474	83
475	149
476	284
477	149
478	453
479	497
480	436
481	448
482	264
483	628
484	380
485	403
486	282
487	212
488	191
489	389
490	426
491	164
492	363
493	465
494	1043
495	511
496	745
497	942
498	131
499	234
500	480
501	2987
502	897
503	967
504	2464
505	2742
506	2714
507	3309
508	2242
509	2964
510	3293
511	3956
512	3869
513	1660
514	881
515	3541
516	1597
517	1293
518	1320
519	2452
520	2393
521	2771
522	1218
523	3317
524	1269
525	4571
526	2392
527	913
528	1829
529	1732
530	2233
531	1387
532	3510
533	2421
534	4832
535	4062
536	5290
537	2704
538	661
539	1069
540	1265
541	2268
542	2181
543	3742
544	1840
545	2566
546	1903
547	1376
548	2594
549	3510
550	1788
551	740
552	2922
553	2317
554	1182
555	2676
556	1625
557	1726
558	3318
559	2669
560	1145
561	3268
562	3175
563	1576
564	1951
565	2039
566	3331
567	573
568	1899
569	2307
570	2336
571	797
572	1779
573	1940
574	3214
575	3473
576	1534
577	3299
578	532
579	1479
580	3004
581	3222
582	2693
583	3210
584	1947
585	2661
586	1976
587	1880
588	624
589	2001
590	2701
591	2379
592	849
593	2492
594	2875
595	2067
596	2801
597	3070
598	3479
599	2202
600	2971
601	3373
602	2662
603	551
604	911
605	1750
606	528
607	2924
608	2417
609	1041
610	1877
611	1136
612	1759
613	2012
614	1515
615	962
616	1285
617	2906
618	3550
619	2113
620	2268
621	503
622	3123
623	2077
624	1045
625	3756
626	2537
627	2324
628	2229
629	1895
630	3008
631	1646
632	1452
633	1949
634	1436
635	2192
636	2393
637	1281
638	1221
639	3399
640	1323
641	2147
642	2769
643	3181
644	3692
645	2974
646	2235
647	3781
648	1373
649	2586
650	714
651	643
652	1226
653	2951
654	908
655	958
656	2305
657	1822
658	2401
659	1527
660	807
661	2051
662	2040
663	3697
664	800
665	2777
666	2361
667	2492
668	1297
669	2701
670	2854
671	3411
672	1526
673	2301
674	1576
675	4181
676	2409
677	1877
678	2464
679	752
680	1817
681	455
682	1785
683	123
684	289
685	304
686	337
687	135
688	237
689	414
690	341
691	321
692	279
693	318
694	612
695	156
696	349
697	153
698	262
699	121
700	153
701	222
702	214
703	140
704	336
705	193
706	302
707	502
708	476
709	315
710	201
711	379
712	250
713	268
714	313
715	265
716	324
717	240
718	108
719	2623
720	815
721	718
722	2266
723	3402
724	640
725	2047
726	1180
727	2636
728	3032
729	1133
730	1873
731	3342
732	1824
733	2513
734	3479
735	2851
736	1664
737	864
738	1792
739	1340
740	531
741	1401
742	2335
743	2415
744	2431
745	2305
746	2305
747	2151
748	3224
749	1879
750	2210
751	1678
752	300
753	166
754	502
755	578
756	301
757	589
758	108
759	157
760	259
761	136
762	324
763	102
764	297
765	300
766	276
767	320
768	155
769	299
770	143
771	204
772	136
773	472
774	449
775	349
776	444
777	448
778	368
779	238
780	515
781	471
782	349
783	178
784	130
785	167
786	467
787	258
788	308
789	353
790	360
791	304
792	173
793	150
794	259
795	196
796	292
797	350
798	196
799	339
800	331
801	366
802	278
803	231
804	278
805	148
806	105
807	82
808	122
809	310
810	273
811	475
812	282
813	136
814	163
815	304
816	115
817	360
818	102
819	106
820	93
821	153
822	189
823	214
824	192
825	325
826	142
827	275
828	112
829	307
830	229
831	182
832	142
833	135
834	313
835	188
836	215
837	128
838	155
839	160
840	352
841	261
842	435
843	165
844	243
845	228
846	134
847	196
848	177
849	106
850	251
851	4258
852	989
853	3567
854	2814
855	879
856	835
857	2232
858	2279
859	4308
860	3380
861	1866
862	2029
863	2779
864	2876
865	3159
866	2964
867	1993
868	2038
869	1499
870	2410
871	2282
872	3219
873	2576
874	3390
875	2285
876	2360
877	1935
878	1870
879	2674
880	1350
881	3821
882	3350
883	1432
884	2256
885	1873
886	1941
887	3876
888	1161
889	2057
890	2958
891	2937
892	2110
893	2902
894	2288
895	1093
896	461
897	466
898	2647
899	2048
900	2516
901	2628
902	2059
903	627
904	1577
905	922
906	2896
907	1318
908	1674
909	2484
910	3157
911	1090
912	1595
913	2702
914	2578
915	747
916	952
917	3862
918	1627
919	2480
920	4775
921	1778
922	1639
923	2581
924	3729
925	3999
926	2640
927	3203
928	3456
929	2691
930	2569
931	1823
932	2190
933	974
934	616
935	404
936	1536
937	1094
938	1547
939	613
940	1485
941	995
942	910
943	1137
944	1103
945	1148
946	1118
947	2077
948	728
949	1032
950	1031
951	409
952	2922
953	1913
954	955
955	571
956	750
957	1423
958	1282
959	648
960	1785
961	1122
962	878
963	512
964	1206
965	483
966	762
967	706
968	1922
969	1402
970	1449
971	1420
972	1722
973	597
974	2400
975	1134
976	1486
977	487
978	2705
979	1539
980	2394
981	942
982	1177
983	937
984	1197
985	512
986	665
987	456
988	845
989	2539
990	1690
991	948
992	1440
993	710
994	856
995	897
996	1120
997	998
998	852
999	1786
1000	1548
1001	933
1002	1549
1003	577
1004	1024
1005	537
1006	1548
1007	927
1008	1126
1009	856
1010	867
1011	2079
1012	648
1013	2256
1014	444
1015	1270
1016	1637
1017	2572
1018	1044
1019	463
1020	464
1021	1160
1022	2133
1023	1382
1024	305
1025	3385
1026	655
1027	207
1028	2819
1029	1425
1030	413
1031	525
1032	206
1033	218
1034	115
1035	354
1036	237
1037	442
1038	411
1039	405
1040	239
1041	286
1042	319
1043	373
1044	580
1045	488
1046	527
1047	338
1048	254
1049	507
1050	199
1051	380
1052	262
1053	260
1054	217
1055	238
1056	273
1057	155
1058	325
1059	279
1060	447
1061	457
1062	204
1063	63
1064	116
1065	142
1066	338
1067	271
1068	254
1069	256
1070	319
1071	237
1072	213
1073	141
1074	78
1075	170
1076	331
1077	146
1078	162
1079	260
1080	252
1081	263
1082	135
1083	162
1084	367
1085	64
1086	87
1087	592
1088	171
1089	26
1090	91
1091	58
1092	195
1093	137
1094	160
1095	161
1096	71
1097	321
1098	58
1099	71
1100	264
1101	224
1102	393
1103	144
1104	207
1105	161
1106	317
1107	128
1108	328
1109	212
1110	341
1111	480
1112	134
1113	197
1114	168
1115	314
1116	279
1117	185
1118	258
1119	190
1120	116
1121	124
1122	201
1123	180
1124	594
1125	171
1126	131
1127	446
1128	224
1129	378
1130	95
1131	326
1132	316
1133	263
1134	395
	Area
1	669
2	2056
3	650
4	894
5	1319
6	1082
7	879
8	562
9	1297
10	809
11	614
12	455
13	1390
14	412
15	1301
16	526
17	850
18	1035
19	958
20	511
21	937
22	452
23	2100
24	634
25	844
26	2129
27	744
28	686
29	815
30	761
31	1335
32	633
33	952
34	1665
35	536
36	1933
37	818
38	880
39	1962
40	1093
41	997
42	971
43	886
44	646
45	1434
46	1563
47	707
48	532
49	974
50	878
51	549
52	787
53	720
54	814
55	1404
56	1226
57	1732
58	1738
59	1533
60	862
61	547
62	620
63	603
64	1161
65	1129
66	975
67	845
68	2819
69	1142
70	952
71	635
72	818
73	588
74	3305
75	903
76	815
77	1169
78	787
79	598
80	778
81	1142
82	488
83	982
84	944
85	1357
86	1870
87	1573
88	1251
89	1040
90	1808
91	1124
92	1152
93	793
94	540
95	575
96	2101
97	529
98	979
99	851
100	877
101	1873
102	1019
103	1818
104	2271
105	1031
106	1371
107	1019
108	956
109	2818
110	569
111	1431
112	1566
113	897
114	438
115	1068
116	552
117	1029
118	425
119	1441
120	951
121	2190
122	974
123	616
124	404
125	1536
126	1094
127	1547
128	613
129	1485
130	995
131	910
132	1137
133	1103
134	1148
135	1118
136	2077
137	728
138	1032
139	1031
140	409
141	2922
142	1913
143	955
144	571
145	750
146	1423
147	1282
148	648
149	1785
150	1122
151	878
152	512
153	1206
154	483
155	762
156	706
157	1922
158	1402
159	1449
160	1420
161	1722
162	597
163	2400
164	1134
165	1486
166	487
167	2705
168	1539
169	2394
170	942
171	1177
172	937
173	1197
174	512
175	665
176	456
177	845
178	2539
179	1690
180	948
181	1440
182	710
183	856
184	897
185	1120
186	998
187	852
188	1786
189	1548
190	933
191	1549
192	577
193	1024
194	537
195	1548
196	927
197	1126
198	856
199	867
200	2079
201	648
202	2256
203	444
204	1270
205	1637
206	2572
207	1044
208	463
209	464
210	1160
211	2133
212	1382
213	1622
214	1486
215	2014
216	640
217	575
218	1208
219	485
220	1174
221	779
222	1911
223	568
224	775
225	1786
226	923
227	1594
228	1665
229	1044
230	1205
231	902
232	908
233	1107
234	1374
235	1407
236	597
237	731
238	950
239	473
240	1419
241	2663
242	1299
243	520
244	1796
245	790
246	723
247	616
248	1444
249	1240
250	1670
251	919
252	1193
253	764
254	2147
255	1525
256	780
257	1929
258	1799
259	846
[truncated: 454 more rows]

## Sheet: Expt3_112819
Muscle-Cre_Dll4f/f		30d after tmx_injure muscle_14d regeneration
Expt 3_112819
	CSA (μm2)
1	480
2	920
3	502
4	191
5	468
6	83
7	168
8	215
9	557
10	608
11	1987
12	748
13	1364
14	522
15	332
16	1373
17	616
18	1317
19	891
20	129
21	2486
22	1234
23	2326
24	650
25	988
26	457
27	846
28	325
29	465
30	1165
31	960
32	730
33	433
34	315
35	445
36	555
37	271
38	112
39	307
40	232
41	158
42	322
43	819
44	1092
45	1270
46	3459
47	1868
48	680
49	209
50	1699
51	2290
52	174
53	1559
54	2769
55	249
56	3202
57	1199
58	1502
59	518
60	537
61	478
62	1349
63	960
64	842
65	706
66	648
67	722
68	2302
69	1605
70	687
71	1417
72	1135
73	328
74	773
75	1394
76	818
77	801
78	174
79	386
80	435
81	188
82	388
83	490
84	665
85	942
86	1568
87	610
88	884
89	664
90	1283
91	962
92	1206
93	583
94	622
95	936
96	676
97	377
98	1367
99	764
100	393
101	708
102	321
103	182
104	180
105	1564
106	900
107	257
108	534
109	1303
110	559
111	466
112	152
113	202
114	182
115	858
116	1194
117	250
118	2164
119	2345
120	848
121	1561
122	92
123	929
124	165
125	888
126	440
127	706
128	582
129	1542
130	327
131	226
132	164
133	1020
134	947
135	1795
136	2510
137	1068
138	1467
139	692
140	191
141	2211
142	1783
143	1287
144	1629
145	374
146	243
147	524
148	273
149	187
150	522
151	308
152	466
153	202
154	276
155	553
156	1001
157	925
158	371
159	321
160	385
161	804
162	438
163	1072
164	151
165	865
166	171
167	577
168	1490
169	1774
170	521
171	144
172	243
173	267
174	627
175	1670
176	590
177	2468
178	1560
179	424
180	465
181	134
182	429
183	908
184	131
185	602
186	133
187	596
188	586
189	686
190	472
191	1225
192	517
193	1271
194	1172
195	731
196	1701
197	2624
198	360
199	281
200	193
201	336
202	1911
203	631
204	629
205	328
206	883
207	290
208	1802
209	2188
210	2674
211	2153
212	1701
213	2672
214	504
215	2477
216	979
217	709
218	408
219	750
220	435
221	236
222	244
223	300
224	251
225	292
226	283
227	505
228	123
229	299
230	662
231	424
232	860
233	124
234	638
235	512
236	700
237	1054
238	244
239	543
240	442
241	1656
242	637
243	618
244	289
245	736
246	165
247	485
248	392
249	129
250	238
251	974
252	1475
253	391
254	819
255	221
256	430
257	542
258	930
259	406
260	404
261	543
262	129
263	107
264	292
265	349
266	256
267	380
268	679
269	547
270	210
271	74
272	125
273	674
274	401
275	455
276	904
277	124
278	170
279	418
280	327
281	420
282	283
283	296
284	572
285	301
286	300
287	319
288	537
289	262
290	240
291	353
292	401
293	299
294	771
295	327
296	307
297	486
298	373
299	711
300	794
301	172
302	691
303	2377
304	351
305	750
306	436
307	1318
308	1170
309	526
310	503
311	958
312	1795
313	716
314	935
315	157
316	357
317	311
318	402
319	392
320	732
321	1248
322	158
323	1065
324	301
325	1690
326	1636
327	236
328	712
329	274
330	369
331	527
332	1148
333	3154
334	354
335	560
336	902
337	2132
338	319
339	207
340	2232
341	1077
342	1201
343	538
344	905
345	236
346	370
347	221
348	188
349	348
350	327
351	131
352	135
353	104
354	502
355	281
356	289
357	207
358	275
359	181
360	289
361	240
362	335
363	242
364	372
365	153
366	573
367	121
368	376
369	474
370	257
371	133
372	93
373	274
374	1452
	Area
1	1392
2	1723
3	1270
4	1799
5	3098
6	935
7	2156
8	764
9	848
10	1540
11	1656
12	1377
13	687
14	1940
15	1049
16	1169
17	2439
18	1431
19	1821
20	2009
21	1551
22	801
23	526
24	2681
25	874
26	952
27	2429
28	958
29	1728
30	756
31	511
32	1295
33	1494
34	1261
35	1494
36	1277
37	542
38	1278
39	916
40	1321
41	1218
42	2720
43	1183
44	1606
45	2955
46	922
47	2313
48	3151
49	565
50	1443
51	2189
52	1011
53	3278
54	1372
55	1276
56	1917
57	1117
58	1431
59	648
60	853
61	1752
62	2620
63	1324
64	618
65	624
66	1311
67	1753
68	1991
69	1690
70	484
71	1754
72	1961
73	749
74	1204
75	627
76	1304
77	715
78	495
79	1985
80	946
81	1233
82	992
83	2132
84	1456
85	2472
86	1907
87	1619
88	1649
89	2150
90	1138
91	1949
92	1718
93	1240
94	1932
95	1243
96	787
97	1566
98	1445
99	1082
100	1774
101	1213
102	1207
103	1117
104	2192
105	2598
106	2110
107	2541
108	837
109	1509
110	838
111	908
112	3179
113	2178
114	587
115	878
116	2131
117	629
118	1602
119	861
120	3341
121	1637
122	2685
123	1098
124	1883
125	1746
126	1005
127	1341
128	679
129	1881
130	2191
131	800
132	1322
133	870
134	2773
135	2376
136	750
137	2229
138	1347
139	2084
140	1732
141	2003
142	2868
143	2275
144	1678
145	823
146	2224
147	1666
148	1386
149	1488
150	2707
151	1149
152	2058
153	1070
154	1163
155	1022
156	1085
157	1004
158	1260
159	1917
160	1011
161	1356
162	538
163	3020
164	4611
165	1420
166	537
167	1360
168	1165
169	1580
170	1469
171	915
172	1278
173	3203
174	910
175	1239
176	772
177	789
178	1660
179	1420
180	2652
181	2647
182	952
183	502
184	885
185	834
186	628
187	2192
188	638
189	2120
190	548
191	2688
192	2484
193	886
194	1683
195	1091
196	1395
197	2366
198	1954
199	1889
200	495
201	3986
202	2952
203	2894
204	2056
205	2013
206	544
207	627
208	1270
209	1123
210	1918
211	1766
212	584
213	2455
214	1240
215	1103
216	1471
217	1371
218	495
219	1478
220	1280
221	628
222	2475
223	955
224	1287
225	2652
226	1645
227	1901
228	2494
229	950
230	1420
231	1537
232	905
233	1006
234	647
235	1552
236	963
237	529
238	1183
239	2523
240	1320
241	921
242	511
243	1486
244	720
245	863
246	1202
247	988
248	1170
249	634
250	816
251	1247
252	2118
253	1228
254	1120
255	1951
256	1001
257	1306
258	1421
259	1796
260	1672
261	2446
262	883
263	1850
264	820
265	1285
266	696
267	746
268	856
269	1169
270	1403
271	1164
272	485
273	752
274	1200
275	644
276	520
277	1088
278	1289
279	831
280	2026
281	803
282	692
283	1837
284	1308
285	537
286	4048
287	1925
288	863
289	1354
290	1336
291	1444
292	3029
293	3953
294	1665
295	1050
296	1076
297	1210
298	1375
299	1350
300	1685
301	463
302	1012
303	1047
304	2956
305	512
306	1151
307	2033
308	1931
309	683
310	737
311	1234
312	3322
313	812
314	808
315	598
316	1488
317	1063
318	953
319	1295
320	1821
321	3004
322	2421
323	768
324	734
325	1330
326	912
327	588
328	590
329	1288
330	1820
331	1503
332	648
333	1676
334	919
335	1082
336	727
337	1235
338	1390
339	534
340	2926
341	2200
342	1008
343	959
344	796
345	2012
346	1313
347	1320
348	1488
349	1573
350	800
351	1645
352	3465
353	2102
354	777
355	1360
356	1677
357	485
358	881
359	714
360	1976
361	642
362	872
363	872
364	618
365	1995
366	158
367	342
368	321
369	259
370	660
371	368
372	368
373	616
374	232
375	368
376	264
377	366
378	270
379	540
380	279
381	209
382	472
383	650
384	84
385	586
386	490
387	358
388	218
389	405
390	1557
391	821
392	241
393	466
394	191
395	1605
396	602
397	350
398	88
399	197
400	520
401	645
402	269
403	935
404	366
405	306
406	55
407	140
408	428
409	187
410	360
411	382
412	221
413	211
414	166
415	129
416	378
417	117
418	169
419	162
420	173
421	169
422	291
423	141
424	195
425	200
426	252
427	322
428	246
429	432
430	403
431	243
432	207
433	331
434	169
435	122
436	388
437	311
438	1085
439	206
440	774
441	297
442	171
443	389
444	132
445	191
446	414
447	454
448	357
449	371
450	572
451	1745
452	147
453	264
454	138
455	192
456	172
457	158
	Area
1	691
2	202
3	415
4	148
5	302
6	762
7	920
8	1173
9	588
10	40
11	136
12	431
13	98
14	245
15	226
16	174
17	613
18	658
19	114
20	815
21	1544
22	1585
23	506
24	665
25	202
26	83
27	112
28	136
29	114
30	375
31	285
32	642
33	765
34	156
35	294
36	484
37	1372
38	2768
39	1925
40	1924
41	1930
42	952
43	506
44	382
45	1110
46	118
47	89
48	84
49	202
50	221
51	218
52	587
53	1174
54	1644
55	1125
56	1625
57	1107
58	2972
59	1707
60	1680
61	2079
62	714
63	306
64	628
65	416
66	701
67	656
68	316
69	1155
70	145
71	174
72	154
73	489
74	129
75	654
76	1595
77	551
78	168
79	217
80	218
81	1261
82	341
83	326
84	180
85	264
86	223
87	570
88	138
89	280
90	342
91	197
92	95
93	241
94	864
95	1366
96	513
97	258
98	908
99	1311
100	1755
101	290
102	1117
103	89
104	304
105	190
106	132
107	181
108	1044
109	275
110	125
111	183
112	702
113	434
114	758
115	314
116	414
117	204
118	1211
119	876
120	292
121	1421
122	1042
123	100
124	1943
125	1381
126	1115
127	245
128	2778
129	797
130	1173
131	1478
132	829
133	554
134	301
135	518
136	455
137	77
138	107
139	209
140	139
141	250
142	1347
143	1293
144	1245
145	1039
146	1097
147	1347
148	1867
149	2322
150	1404
151	1408
152	826
153	954
154	68
155	122
156	1022
157	2682
158	619
159	966
160	753
161	177
162	209
163	2190
164	1430
165	1619
166	990
167	1189
168	1947
169	1067
170	1105
171	1646
172	508
173	2000
174	1504
175	548
176	1776
177	1657
178	1394
179	2349
180	710
181	1722
182	1654
183	540
184	1984
185	238
186	3691
187	1953
188	1281
189	195
190	1017
191	1076
192	905
193	654
194	286
195	123
196	667
197	446
198	319
199	1450
200	540
201	602
202	2795
203	1602
204	1719
205	1317
206	433
207	872
208	1066
209	1703
210	3340
211	260
212	264
213	444
214	516
215	581
216	293
217	766
218	1579
219	1470
220	2185
221	872
222	1507
223	3041
224	1599
225	1349
226	1713
227	2224
228	221
229	101
230	43
231	101
232	1227
233	1934
234	1101
235	523
236	297
237	335
238	123
239	29
240	99
241	864
242	1723
243	2443
244	1073
245	679
246	2044
247	1685
248	1398
249	1310
250	455
251	831
252	777
253	612
254	482
255	3407
256	471
257	1169
258	567
259	630
260	1429
261	254
262	908
263	1121
264	1504
265	985
266	1497
267	1978
268	1242
269	548
270	420
271	813
272	920
273	213
274	533
275	116
276	165
277	1681
278	1772
279	822
280	1905
281	253
282	285
283	1560
284	1535
285	1608
286	973
287	409
288	629
289	1586
290	2115
291	2744
292	2303
293	1015
294	1814
295	1282
296	537
297	114
298	2179
299	554
300	383
301	418
302	533
303	95
304	185
305	264
306	218
307	82
308	2860
309	305
310	799
311	1148
312	352
313	993
314	134
315	1067
316	1366
317	649
318	1872
319	1089
320	155
321	638
322	747
323	1067
324	463
325	148
326	2026
327	1810
328	921
329	2574
330	3781
331	1896
332	2993
333	1713
334	1177
335	1376
336	891
337	1223
338	1531
339	1169
340	328
341	349
342	529
343	1308
344	1628
345	2734
346	284
347	183
348	222
349	300
350	331
351	384
352	248
353	76
354	144
355	403
356	419
357	370
358	493
359	365
360	403
361	717
362	224
363	1543
364	872
365	263
366	326
367	338
368	188
369	170
370	378
371	1539
372	100
373	176
374	170
375	385
376	121
377	1215
378	161
379	327
380	633
381	483
382	540
383	387
384	196
385	378
386	371
387	226
388	928
389	473
390	119
391	145
392	406
393	401
394	186
395	189
396	278
397	403
398	1489
399	3459
400	1898
401	550
402	298
403	938
404	1499
405	948
406	234
407	1658
408	1309
409	1362
410	1569
411	681
412	3491
413	1983
414	1629
415	1497
416	621
417	467
418	405
419	848
420	1477
421	418
422	1033
423	1042
424	1282
425	1751
426	2720
427	160
428	93
429	177
430	218
431	927
432	2662
433	1500
434	245
435	3031
436	2274
437	831
438	770
439	1078
440	341
441	206
442	900
443	2526
444	1327
445	1813
446	619
447	815
448	1315
449	3129
450	1316
451	2109
452	3758
453	1279
454	1173
455	1248
456	823
457	1588
458	1413
459	263
460	1600
461	1158
462	1959
463	1405
464	2537
465	193
466	1660
467	603
468	530
469	1899
470	305
471	741
472	565
473	1355
474	2757
475	1641
476	2627
477	722
478	1569
479	170
480	3201
481	196
482	259
483	354
484	116
485	280
486	159
487	305
488	179
489	298
490	206
491	99
492	101
493	45
494	313
495	243
496	968
497	415
498	342
499	492
500	1443
501	378
502	287
503	616
504	474
505	161
506	1655
507	662
508	2049
509	1324
510	484
511	79
512	332
513	188
514	182
515	352
516	191
517	2955
518	992
519	151
520	1234
521	328
522	192
523	471
524	82
525	72
526	108
527	151
528	297
529	178
530	592
531	526
532	272
533	156
534	420
535	156
536	203
537	99
538	66
539	98
540	117
541	235
542	113
543	236
544	98
545	159
546	109
547	57
548	106
549	81
550	146
551	157
552	474
553	510
554	187
555	243
556	142
557	110
558	181
559	169
560	102
561	183
562	188
563	357
564	360
565	444
566	273
567	522
568	404
569	117
570	139
571	171
572	644
573	163
574	505
575	515
576	1025
	Area
1	288
2	1548
3	795
4	182
5	212
6	309
7	201
8	237
9	101
10	208
11	491
12	316
13	149
14	178
15	298
16	176
17	112
18	145
19	605
20	768
21	1074
22	712
23	319
24	217
25	1116
26	809
27	101
28	155
29	947
30	337
31	567
32	427
33	181
34	303
35	195
36	180
37	70
38	64
39	84
40	127
41	254
42	215
43	114
44	110
45	80
46	79
47	158
48	169
49	341
50	63
51	207
52	81
53	122
54	86
55	172
56	142
57	275
58	73
59	73
60	136
61	230
62	527
63	1082
64	992
65	1006
66	97
67	88
68	149
69	174
70	493
71	152
72	138
73	58
74	217
75	288
76	179
77	66
78	194
79	40
80	78
81	430
82	345
83	209
84	58
85	74
86	1052
87	353
88	84
89	216
90	301
91	186
92	382
93	498
94	268
95	211
96	271
97	187
98	249
99	472
100	95
101	218
102	577
103	40
104	135
105	39
106	542
107	377
108	417
109	76
110	118
111	156
112	367
113	169
114	103
115	116
116	972
117	70
118	137
119	91
120	188
121	201
122	222
123	142
124	131
125	310
126	345
127	109
128	109
129	176
130	97
131	106
132	821
133	121
134	1352
135	84
136	1795
137	1162
138	681
139	1578
140	914
141	185
142	154
143	2012
144	1535
145	1664
146	993
147	1480
148	936
149	418
150	52
151	116
152	561
153	286
154	521
155	1049
156	45
157	68
158	273
159	122
160	45
161	124
162	139
163	858
164	417
165	754
166	120
167	92
168	116
169	70
170	123
171	82
172	146
173	456
174	30
175	168
176	774
177	486
178	782
179	1295
180	1661
181	76
182	144
183	585
184	1008
185	1460
186	194
187	1472
188	129
189	855
190	1069
191	2312
192	103
193	1289
194	2801
195	1735
196	302
197	618
198	1194
199	1133
200	772
201	1249
202	631
203	890
204	489
205	326
206	195
207	445
208	110
209	150
210	227
211	259
212	366
213	436
214	769
215	505
216	646
217	257
218	127
219	112
220	1027
221	609
222	463
223	575
224	584
225	390
226	1551
227	919
228	822
229	85
230	90
231	82
232	85
233	189
234	276
235	277
236	62
237	527
238	124
239	179
240	200
241	135
242	128
243	101
244	41
245	118
246	114
247	2805
248	1066
249	122
250	307
251	126
252	92
253	160
254	109
255	703
256	221
257	359
258	155
259	121
260	234
261	236
262	469
263	367
264	104
265	273
266	767
267	372
268	253
269	152
270	138
271	178
272	195
273	166
274	187
275	215
276	147
277	174
278	79
279	97
280	84
281	249
282	79
283	172
284	80
285	1210
286	673
287	1156
288	401
289	366
290	116
291	49
292	231
293	24
294	93
295	229
296	232
297	264
298	102
299	262
300	136
301	206
302	227
303	171
304	87
305	181
306	440
307	166
308	430
309	88
310	74
311	88
312	310
313	30
314	318
315	259
316	210
317	93
318	65
319	213
320	171
321	254
322	422
323	237
324	281
325	92
326	160
327	105
328	243
329	220
330	372
331	63
332	311
333	245
334	71
335	201
336	319
337	337
338	185
339	99
340	181
341	76
342	197
343	106
344	32
345	128
346	103
347	128
348	80
349	152
350	139
351	131
352	101
353	108
354	310
355	189
356	124
357	139
358	117
359	131
360	115
361	76
362	117
363	264
364	147
365	142
366	204
367	132
368	134
369	84
370	76
371	51
372	125
373	172
374	51
375	265
376	97
377	294
378	117
379	84
380	84
381	95
382	115
383	161
384	39
385	183
386	146
387	202
388	102
389	181
390	120
391	111
392	105
393	144
394	143
395	128
396	106
397	174
398	128
399	106
400	288
401	1237
402	83
403	158
404	72
405	125
406	294
407	65
408	336
409	125
410	73
411	89
412	211
413	115
414	282
415	286
416	393
417	477
418	296
419	704
420	375
421	84
422	223
423	208
424	625
425	319
426	241
427	324
428	596
429	157
430	602
431	637
432	316
433	319
434	76
435	90
436	48
437	152
438	261
439	66
440	119
441	123
442	68
443	80
444	2359
445	551
446	312
447	100
448	174
449	174
450	852
451	1228
452	775
453	254
454	652
455	444
456	73
457	341
458	343
459	130
460	129
461	62
462	194
463	110
464	188
465	81
466	118
467	380
468	292
469	109
470	265
471	57
472	97
473	183
474	461
475	188
476	185
477	122
478	253
479	78
480	244
481	101
482	253
483	1995
484	725
485	408
486	205
487	147
488	667
489	261
490	270
491	800
492	379
493	375
494	447
495	430
496	170
497	104
498	48
499	183
500	142
501	353
502	225
503	87
504	63
505	104
506	112
507	101
508	95
509	122
510	188
511	141
512	65
513	115
514	50
515	100
516	102
517	168
518	166
519	128
520	128
521	163
522	202
523	281
524	135
525	232
526	226
527	339
528	167
529	200
530	164
531	112
532	176
533	300
534	211
535	229
536	64
537	927
538	392
539	47
540	574
541	230
542	275
543	79
544	72
545	185
546	169
547	139
548	198
549	220
550	361
551	165
552	149
553	161
554	101
555	163
556	148
557	205
558	347
559	209
560	200
561	291
562	475
563	345
564	163
565	64
566	119
567	262
568	114
569	197
570	245
571	136
572	988
573	573
574	278
575	851
576	196
577	104
578	117
579	221
580	583
581	356
582	90
583	218
584	379
585	633
586	673
587	274
[truncated: 581 more rows]

## Sheet: Ctrl1_050220
Dll4f/f		30d after tmx_injure muscle_14d regeneration
Ctrl 1_050220
	CSA (μm2)
1	899
2	189
3	700
4	222
5	651
6	126
7	184
8	100
9	180
10	126
11	196
12	123
13	512
14	1098
15	883
16	1130
17	1090
18	162
19	678
20	144
21	396
22	286
23	1784
24	1072
25	298
26	670
27	1002
28	262
29	690
30	113
31	869
32	846
33	1404
34	1235
35	967
36	1006
37	1348
38	1666
39	708
40	92
41	264
42	206
43	161
44	236
45	165
46	239
47	591
48	1031
49	588
50	387
51	728
52	651
53	1486
54	393
55	236
56	196
57	722
58	1312
59	313
60	330
61	304
62	222
63	554
64	481
65	274
66	62
67	129
68	352
69	143
70	311
71	889
72	838
73	147
74	584
75	511
76	183
77	902
78	392
79	424
80	379
81	343
82	663
83	400
84	187
85	132
86	840
87	771
88	277
89	769
90	624
91	782
92	714
93	385
94	143
95	512
96	223
97	144
98	1653
99	842
100	1012
101	348
102	237
103	107
104	159
105	450
106	432
107	209
108	807
109	1177
110	540
111	117
112	516
113	290
114	499
115	736
116	135
117	418
118	618
119	122
120	528
121	139
122	179
123	197
124	274
125	485
126	446
127	376
128	197
129	266
130	444
131	714
132	300
133	1259
134	192
135	306
136	590
137	532
138	802
139	229
140	1706
141	1443
142	707
143	504
144	465
145	437
146	90
147	136
148	516
149	185
150	408
151	305
152	125
153	139
154	137
155	122
156	116
157	550
158	384
159	450
160	1057
161	766
162	569
163	857
164	212
165	288
166	781
167	635
168	207
169	267
170	725
171	140
172	495
173	311
174	228
175	180
176	787
177	645
178	188
179	368
180	203
181	237
182	362
183	136
184	767
185	183
186	409
187	425
188	485
189	415
190	588
191	1333
192	450
193	404
194	1066
195	754
196	797
197	1075
198	758
199	337
200	1110
201	997
202	483
203	620
204	774
205	156
206	145
207	1104
208	669
209	496
210	720
211	358
212	149
213	1018
214	1533
215	686
216	492
217	713
218	733
219	1089
220	586
221	411
222	974
223	698
224	445
225	358
226	356
227	292
228	1024
229	451
230	269
231	859
232	871
233	1041
234	177
235	635
236	158
237	448
238	852
239	313
240	853
241	262
242	589
243	376
244	163
245	344
246	153
247	706
248	425
249	240
250	1125
251	410
252	256
253	1082
254	317
255	509
256	725
257	793
258	608
259	552
260	327
261	281
262	174
263	235
264	259
265	501
266	229
267	714
268	1158
269	1133
270	523
271	667
272	360
273	790
274	813
275	1329
276	693
277	256
278	742
279	1231
280	454
281	894
282	341
283	420
284	956
285	1134
286	1516
287	747
288	512
289	987
290	621
291	518
292	665
293	833
294	273
295	414
296	1433
297	809
298	632
299	1105
300	306
301	248
302	416
303	545
304	817
305	1226
306	1014
307	593
308	1138
309	536
310	488
311	1358
312	782
313	958
314	583
315	469
316	493
317	1597
318	562
319	402
320	655
321	943
322	549
323	722
324	270
325	224
326	154
327	335
328	730
329	1404
330	544
331	466
332	550
333	282
334	542
335	976
336	1292
337	1414
338	718
339	316
340	807
341	395
342	724
343	1281
344	1313
345	944
346	923
347	978
348	289
349	198
350	112
351	794
352	641
353	1491
354	849
355	1376
356	1207
357	829
358	482
359	979
360	643
361	889
362	472
363	583
364	1197
365	1118
366	1060
367	1440
368	933
369	948
370	1376
371	1524
372	1248
373	1090
374	1120
375	221
376	1015
377	2053
378	1069
379	409
380	1248
381	707
382	968
383	1091
384	594
385	681
386	764
387	1092
388	607
389	684
390	691
391	981
392	629
393	662
394	656
395	1035
396	692
397	1194
398	1054
399	912
400	894
401	349
402	472
403	536
404	490
405	878
406	2031
407	1723
408	1562
409	778
410	649
411	662
412	1068
413	742
414	561
415	681
416	1497
417	676
418	1125
419	986
420	387
421	252
422	321
423	802
424	866
425	1278
426	995
427	934
428	681
429	851
430	324
431	657
432	582
433	1551
434	818
435	719
436	592
437	560
438	264
439	349
440	380
441	408
442	411
443	1182
444	571
445	499
446	684
447	611
448	202
449	363
450	937
451	202
452	387
453	409
454	234
455	290
456	448
457	1079
458	705
459	434
460	470
461	1537
462	759
463	177
464	1134
465	1040
466	566
467	1321
468	792
469	1586
470	904
471	340
472	636
473	365
474	150
475	346
476	831
477	2211
478	590
479	579
480	360
481	389
482	840
483	431
484	924
485	1089
486	1055
487	1510
488	1615
489	731
490	255
491	334
492	194
493	186
494	379
495	892
496	217
497	259
498	594
499	338
500	467
501	365
502	546
503	392
504	525
505	467
506	899
507	992
508	687
509	543
510	475
511	584
512	559
513	792
514	597
515	288
516	523
517	507
518	864
519	340
520	1121
521	520
522	323
523	280
524	1156
525	547
526	455
527	709
528	330
529	1191
530	1793
531	2218
532	1097
533	197
534	495
535	448
536	1287
537	207
538	1175
539	1300
540	243
541	633
542	516
543	349
544	405
545	224
546	297
547	631
548	600
549	549
550	474
551	447
552	648
553	1614
554	1577
555	644
556	1130
557	468
558	461
559	357
560	222
561	158
562	344
563	721
564	487
565	623
566	901
567	251
568	1180
569	679
570	1280
571	1093
572	574
573	714
574	620
575	799
576	566
577	1245
578	1393
579	1337
580	267
581	342
582	385
583	748
584	412
585	407
586	343
587	469
588	190
589	283
590	1573
591	1549
592	295
593	746
594	378
595	315
596	1034
597	777
598	203
599	421
600	357
601	1571
602	939
603	323
604	321
605	676
606	359
607	1100
608	497
609	436
610	296
611	196
612	272
613	832
614	768
615	669
616	550
617	851
618	458
619	699
620	553
621	834
622	553
623	593
624	838
625	569
626	668
627	630
628	547
629	791
630	989
631	1128
632	1114
633	1087
634	549
635	1507
636	1718
637	504
638	1008
639	972
640	1774
641	1486
642	1107
1	753
2	665
3	758
4	757
5	263
6	268
7	304
8	493
9	758
10	608
11	814
12	626
13	758
14	605
15	1571
16	763
17	387
18	1349
19	1106
20	1780
21	1217
22	878
23	870
24	1106
25	1184
26	417
27	347
28	606
29	765
30	399
31	435
32	999
33	766
34	943
35	891
36	1161
37	1882
38	1083
39	463
40	1189
41	621
42	228
43	1001
44	1042
45	1442
46	945
47	1133
48	1220
49	1178
50	373
51	1040
52	760
53	404
54	777
55	562
56	856
57	962
58	452
59	1055
60	1028
61	1566
62	1572
63	691
64	640
65	1172
66	538
67	642
68	316
69	346
70	698
71	1248
72	467
73	524
74	599
75	1286
76	991
77	544
78	189
79	1545
80	1281
81	390
82	422
83	544
84	975
85	386
86	186
87	1000
88	1320
89	827
90	773
91	292
92	150
93	829
94	860
95	1002
96	1256
97	1003
98	1472
99	901
100	444
101	1037
102	1246
103	1506
104	567
105	775
106	1899
107	277
108	488
109	559
110	322
111	449
112	399
113	675
114	693
115	685
116	614
117	698
118	1401
119	575
120	826
121	541
122	808
123	211
124	1005
125	1062
126	504
127	1202
128	1846
129	545
130	599
131	606
132	810
133	424
134	1589
135	1036
136	1455
137	940
138	458
139	373
140	917
141	930
142	1423
143	1284
144	829
145	697
146	332
147	512
148	477
149	1181
150	1036
151	1469
152	578
153	741
154	354
155	555
156	482
157	482
158	1230
159	1089
160	900
161	1573
162	1049
163	161
164	93
165	869
166	1117
167	1372
168	858
169	1814
170	1082
171	1217
172	306
173	959
174	1913
175	1244
176	516
177	659
178	1382
179	971
180	1310
181	1804
182	1011
183	298
184	366
185	820
186	1154
187	816
188	1131
189	518
190	147
191	283
192	549
193	541
194	534
195	1327
196	616
197	625
198	1102
199	1046
200	624
201	1237
202	967
203	611
204	944
205	1264
206	519
207	725
208	1180
209	1956
210	1223
211	250
212	1409
213	1009
214	340
215	376
216	624
217	491
218	365
219	655
220	635
221	378
222	488
223	790
224	292
225	367
226	594
227	855
228	1063
229	747
230	508
231	1040
232	990
233	305
234	836
235	355
236	479
237	858
238	1734
239	820
240	826
241	643
242	771
243	569
244	297
245	633
246	864
247	625
248	597
249	688
250	831
251	1195
252	626
253	395
254	414
255	768
256	864
257	973
258	669
259	491
260	784
261	1058
262	902
263	331
264	454
265	1224
266	463
267	453
268	624
269	393
270	451
271	305
272	679
273	864
274	862
275	1128
276	1173
277	587
278	1056
279	1103
280	1321
281	582
282	1180
283	1263
284	1435
285	1095
286	540
287	1066
288	927
289	294
290	649
291	869
292	476
293	760
294	1357
295	635
296	721
297	493
298	969
299	389
300	721
301	1389
302	883
303	909
304	1214
305	1066
306	438
307	655
308	271
309	521
310	333
311	479
312	374
313	319
314	243
315	398
316	319
317	500
318	252
319	377
320	1430
321	337
322	746
323	1438
324	399
325	727
326	1003
327	613
328	909
329	1471
330	1192
331	539
332	210
333	181
334	570
335	251
336	573
337	528
338	1701
339	1572
340	673
341	1705
342	1774
343	721
344	559
345	1165
346	164
347	293
348	741
349	666
350	1682
351	1119
352	774
353	1729
354	891
355	1039
356	223
357	262
358	1405
359	1391
360	183
361	791
362	504
363	969
364	564
365	1396
366	845
367	561
368	1467
369	1867
370	906
371	226
372	1100
373	1662
374	2065
375	891
376	910
377	395
378	1041
379	283
380	418
381	297
382	325
383	782
384	807
385	1957
386	725
387	612
388	1016
389	1446
390	1260
391	1177
392	976
393	629
394	925
395	224
396	1003
397	2330
398	1526
399	817
400	387
1	1396
2	2009
3	3382
4	1275
5	1517
6	1485
7	1388
8	695
9	2560
10	1373
11	801
12	1465
13	995
14	1506
15	1453
16	848
17	436
18	409
19	516
20	768
21	1403
1	910
2	1136
3	1934
4	1068
5	864
6	1133
7	2373
8	1214
9	612
10	503
11	655
12	2022
13	466
14	1023
15	671
16	678
17	984
18	1250
19	814
20	682
21	1073
22	593
23	961
24	787
25	1267
26	671
27	1176
28	1117
29	1471
30	1052
31	1213
32	1260
33	689
34	870
35	769
36	1417
37	1480
38	1960
39	1178
40	1077
41	1415
42	916
43	1618
44	1538
45	1607
46	731
47	1113
48	1460
49	842
50	828
51	1898
52	1314
53	1005
54	1658
55	747
56	902
57	1325
58	951
59	648
60	1525
61	631
62	1602
63	1083
64	1255
65	1995
66	714
67	475
68	952
69	1382
70	1490
71	1253
72	1276
73	1456
74	1191
75	812
76	1047
77	1395
78	1189
79	808
80	1308
81	656
82	1041
83	773
84	1005
85	920
86	838
87	1605
88	1344
89	861
90	1026
91	733
92	1330
93	1326
94	988
95	1115
96	721
97	1014
98	744
99	1103
100	1661
101	1139
102	1013
103	888
104	1180
105	1560
106	1431
107	885
108	794
109	1209
110	682
111	1372
112	1282
113	1186
114	1833
115	1032
116	905
117	848
118	1328
119	1453
120	1278
121	854
122	2773
123	1052
124	1270
125	989
126	1903
127	942
128	1159
129	856
130	1017
131	902
132	1509
133	972
134	815
135	1982
136	861
137	652
138	1330
139	1802
140	797
141	1306
142	882
143	1285
144	1556
145	845
146	534
147	1541
148	2012
149	1579
150	594
151	2000
152	1031
153	1450
154	654
155	1392
156	1473
157	1903
158	1169
159	2149
160	1341
161	925
162	776
163	1297
164	1586
165	1905
166	1787
167	2009
168	1627
169	1186
170	1379
171	1175
172	818
173	883
174	1438
175	569
176	1212
177	782
178	859
179	910
180	1664
181	1097
182	1424
183	1479
184	1592
185	1584
186	1782
187	1269
188	910
189	1739
190	1753
191	2766
192	1522
193	954
194	1319
195	591
196	1554
197	886
198	812
199	1558
200	2106
201	2339
202	1284
203	872
204	1914
205	706
206	1944
207	733
208	1629
209	744
210	1147
211	1100
212	811
213	1383
214	2172
215	969
216	659
217	2003
218	1955
219	1049
220	2023
221	2268
222	1271
223	1760
224	886
225	1670
226	1089
227	1109
228	941
229	666
230	1137
231	1638
232	666
233	1113
234	1384
235	865
236	802
237	875
238	1687
239	1185
240	1408
241	1284
242	2437
243	1057
244	1547
245	2054
246	1158
247	1445
248	739
249	1491
250	1714
251	1769
252	1667
253	1409
254	699
255	679
256	387
257	281
258	319
259	1000
260	311
261	1848
262	672
263	425
264	973
265	913
266	865
267	512
268	1001
269	346
270	259
271	1028
272	370
273	204
274	509
275	605
276	375
277	352
278	711
279	368
280	570
281	420
282	298
283	1148
284	1044
285	964
286	2004
287	654
288	932
289	680
290	588
291	384
292	482
293	1052
294	228
295	229
296	586
297	558
298	497
299	344
300	786
301	713
302	193
303	273
304	561
305	357
306	713
307	654
308	249
309	373
310	579
311	401
312	826
1	1243
2	740
3	1834
4	1081
5	1058
6	1168
7	680
8	746
9	760
10	1306
11	1284
12	1281
13	924
14	1077
15	908
16	1475
17	1011
18	946
19	1081
20	1691
21	808
22	896
23	1031
24	765
25	941
26	1066
27	589
28	1303
29	541
30	680
31	1083
32	1385
33	601
34	707
35	1278
36	2004
37	964
38	1298
39	802
40	714
41	646
42	678
43	643
44	863
45	1781
46	838
47	865
48	1951
49	1167
50	1097
51	910
52	1493
53	720
54	546
55	1142
56	1426
57	858
58	745
59	2184
60	1468
61	1424
62	1177
63	1266
64	674
65	1274
66	1621
67	1411
68	637
69	1046
70	1134
71	949
72	478
73	559
74	1114
75	783
76	619
77	809
78	777
79	1283
80	951
81	1376
82	1281
83	1067
84	1540
85	1210
86	793
87	1127
88	591
89	501
90	1152
91	1137
92	642
93	748
94	917
95	926
96	1605
97	1279
98	1084
99	1607
100	1003
101	1037
102	870
103	968
104	612
105	819
106	849
107	1611
108	1232
109	683
110	1243
111	697
112	644
113	1411
114	1580
115	1601
116	697
117	1606
118	1130
119	570
120	1368
121	1145
122	760
123	981
124	621
125	519
126	1382
127	1118
128	1227
129	971
130	890
131	940
132	985
133	1739
134	1032
135	1070
136	2008
137	723
138	1062
139	821
140	1488
141	1414
142	1342
143	933
144	1505
145	1240
146	1231
147	1030
148	1442
149	848
150	1882
151	687
152	1562
153	852
154	1297
155	1366
156	864
157	940
158	1175
159	874
160	1306
161	853
162	677
163	1348
164	1757
165	1278
166	1053
167	1325
168	1294
169	1742
170	1967
171	625
172	2118
173	1908
174	1848
175	484
176	595
177	879
178	1385
179	1448
180	721
181	760
182	1213
183	1104
184	1166
185	870
186	1488
187	1910
188	964
189	1663
190	1960
191	1046
192	1704
193	1103
194	1382
195	1334
196	2491
197	897
198	1105
199	838
200	847
201	1012
202	1450
203	1685
204	1687
205	1851
206	1832
207	1043
208	832
209	1535
210	1799
211	1187
212	1180
213	1687
214	2102
215	1456
216	2591
217	1407
218	1701
219	1005
220	1316
221	1478
222	2066
223	1225
224	1897
225	2351
226	1292
227	1750
228	630
229	1160
230	1506
231	1324
232	3021
233	1555
234	1003
235	938
236	1470
237	2177
238	1423
239	1571
240	2884
241	1405
242	1079
243	864
244	1540
245	2244
246	1331
247	2020
248	1715
249	1139
250	647
251	1472
252	2373
253	1321
254	1292
255	2070
256	1672
257	1028
258	1132
259	1130
260	577
261	1652
262	1898
263	820
264	1739
265	891
266	693
267	2229
268	1305
269	1205
270	1797
271	1934
272	1571
273	823
274	2281
275	1069
276	937
277	1893
278	1447
279	1386
280	1894
281	2783
282	1889
283	1844
284	1814
285	1799
286	1188
287	1246
288	1819
289	1406
290	907
291	1187
292	1313
293	1487
294	1369
295	779
296	2758
297	1287
298	2796
299	1657
300	2423
301	1294
302	1919
303	1482
304	1343
305	544
306	1353
307	1187
308	1303
309	1396
310	1646
311	1981
312	677
313	1337
314	530
315	145
316	776
317	223
318	732
319	268
320	790
321	702
322	859
323	403
324	695
325	464
326	469
327	905
328	467
329	258
330	254
331	361
332	479
333	358
334	842
335	1128
336	658
337	642
338	578
339	871
340	622
341	1130
342	630
343	2494
344	1370
1	657
2	1476
3	676
4	1324
5	1200
6	2113
7	1589
8	1756
9	806
10	1651
11	758
12	1268
13	810
14	546
15	1484
16	1261
17	955
18	845
19	1322
20	1358
21	849
22	2084
23	618
24	994
25	1074
26	891
27	775
28	2347
29	788
30	1393
31	1131
32	960
33	1629
34	716
35	1912
36	1204
37	1619
38	1003
39	947
40	770
41	1468
42	758
43	1676
44	2112
45	1815
46	2040
47	756
48	1210
49	679
50	1556
51	1335
52	1418
53	1487
54	1638
55	865
56	1371
57	1097
58	1215
59	2086
60	1664
61	3349
62	583
63	942
64	1276
65	1109
66	1668
67	1109
68	1384
69	1469
70	1333
71	1123
72	1881
73	614
74	1723
75	389
76	1204
77	1474
78	1543
79	1749
80	1153
81	1780
82	743
83	707
84	2049
85	1441
86	1052
87	917
88	1139
89	730
90	894
91	2279
92	1520
93	1377
94	946
95	1736
96	1448
97	864
98	1551
99	552
100	607
101	1218
102	714
103	1300
104	766
105	1165
106	1168
107	831
108	1092
109	1488
110	1572
111	1321
112	862
113	1721
114	1071
115	1907
116	1148
117	1404
118	1051
119	2428
120	1473
121	1417
122	796
123	701
124	833
125	2235
126	1121
127	1854
128	1058
129	798
130	1832
131	2356
132	455
133	1679
134	1663
135	971
136	1450
137	1526
138	1899
139	570
140	1690
141	923
142	2112
143	1570
144	1404
145	2118
146	1508
147	968
148	2557
149	2287
150	2040
151	1251
152	786
153	1358
154	2814
155	1385
156	744
157	1706
158	1367
159	2038
160	2009
161	2667
162	1662
163	1077
164	2942
165	1278
166	863
167	2008
168	1283
169	1358
170	1862
171	1559
172	2249
173	2067
174	2061
175	1009
176	1510
177	2039
178	991
179	1367
180	1527
181	2007
182	1356
183	1440
184	1160
185	2717
186	1419
187	1589
188	1278
189	2592
190	2512
191	1653
192	1502
193	3209
194	2869
195	2137
196	2202
197	695
198	1494
199	816
200	651
201	2016
202	882
203	765
204	784
205	399
206	433
207	672
208	966
209	597
1	815
2	1412
3	1679
4	2008
5	2062
6	2541
7	3034
8	1153
9	1084
10	1207
11	1171
12	1464
13	1394
14	497
15	2109
16	2772
17	1960
18	1967
19	624
20	1591
21	1501
22	1100
23	1146
24	1622
25	615
26	2052
27	1203
28	1951
29	2021
30	1584
31	1452
32	1604
33	1807
34	1494
35	2624
36	2912
37	1761
38	2118
39	1598
40	1645
41	2093
42	2519
43	2137
44	1546
45	2095
46	3333
47	1811
48	2464
49	1358
50	2462
51	1270
52	2168
53	1788
54	1363
55	2002
56	1715
57	1130
58	1826
59	1614
60	1280
61	1330
62	857
63	1340
64	2064
65	1517
66	1929
67	1661
68	1260
69	1731
[truncated: 259 more rows]

## Sheet: Expt7_050220
Muscle-Cre_Dll4f/f		30d after tmx_injure muscle_14d regeneration
Expt 7_050220
	CSA (μm2)
1	1620
2	1510
3	475
4	1339
5	959
6	688
7	916
8	730
9	1198
10	993
11	801
12	475
13	778
14	768
15	659
16	719
17	494
18	952
19	541
20	1121
21	523
22	1234
23	816
24	886
25	377
26	723
27	694
28	1200
29	490
30	674
31	531
32	899
33	760
34	1151
35	504
36	712
37	1542
38	575
39	479
40	635
41	459
42	587
43	1243
44	755
45	959
46	473
47	660
48	656
49	514
50	564
51	1135
52	532
53	948
54	622
55	553
56	922
57	569
58	1251
59	760
60	500
61	577
62	959
63	1344
64	784
65	635
66	966
67	815
68	512
69	725
70	632
71	484
72	671
73	510
74	1982
75	1215
76	1015
77	424
78	1162
79	997
80	1080
81	853
82	526
83	823
84	781
85	1060
86	662
87	465
88	673
89	1092
90	1340
91	674
92	1644
93	607
94	780
95	532
96	775
97	1524
98	756
99	766
100	679
101	788
102	974
103	2037
104	1007
105	608
106	729
107	868
108	1633
109	681
110	1229
111	1281
112	709
113	1059
114	522
115	1335
116	849
117	594
118	588
119	611
120	1055
121	1213
122	1011
123	990
124	880
125	823
126	576
127	1048
128	790
129	1224
130	1003
131	940
132	953
133	442
134	661
135	853
136	1566
137	583
138	994
139	1012
140	666
141	790
142	1158
143	1556
144	1628
145	533
146	993
147	814
148	1008
149	790
150	926
151	1929
152	776
153	630
154	1340
155	1820
156	518
157	1787
158	798
159	1255
160	1584
161	1163
162	733
163	1589
164	654
165	1840
166	601
167	407
168	801
169	562
170	1201
171	970
172	578
173	523
174	1816
175	1198
176	1827
177	1755
178	1754
179	773
180	800
181	1350
182	691
183	1102
184	1403
185	1273
186	910
187	1550
188	2459
189	1121
190	800
191	673
192	815
193	920
194	626
195	1142
196	475
197	1059
198	2358
199	1048
200	581
201	866
202	940
203	1140
204	1689
205	1497
206	557
207	1089
208	1159
209	1353
210	1267
211	796
212	1616
213	1322
214	1764
215	713
216	1388
217	943
218	1079
219	837
220	1014
221	797
222	1554
223	635
224	361
225	252
226	198
227	238
228	256
229	181
230	204
231	732
232	363
233	278
234	330
235	273
236	197
237	298
238	129
239	131
240	319
241	246
242	324
243	492
244	284
245	414
246	277
247	137
248	194
249	153
250	222
251	158
252	104
253	247
254	176
255	158
256	144
257	205
258	134
259	132
260	193
261	280
262	178
263	215
264	221
265	123
266	120
267	91
268	235
269	467
270	391
271	143
272	174
273	72
274	163
275	507
276	189
277	222
278	182
279	423
280	207
281	246
282	186
283	490
284	185
285	112
286	253
287	175
288	180
289	240
290	119
291	104
292	151
293	229
294	82
295	93
296	115
297	111
298	112
299	81
300	123
301	121
302	179
303	340
304	123
305	274
306	171
307	210
308	240
309	179
310	347
311	1785
312	134
313	338
314	214
315	303
316	467
317	262
318	439
319	278
320	221
321	160
322	252
323	110
324	137
325	221
326	149
327	147
328	256
329	206
330	372
331	321
332	488
333	557
334	196
335	172
336	274
337	367
338	143
339	122
340	161
341	108
342	139
343	210
344	353
345	272
346	308
347	462
348	469
349	390
350	155
351	468
352	221
353	282
354	171
355	151
356	569
357	236
358	146
359	225
360	178
361	142
362	254
363	149
364	333
365	278
366	171
367	186
368	152
369	98
370	136
371	168
372	75
373	630
374	294
375	326
376	165
377	267
378	164
379	232
380	294
381	379
382	281
383	109
384	414
385	175
386	130
387	121
388	120
389	290
390	252
391	118
392	343
393	137
394	234
395	107
396	263
397	139
398	174
399	161
400	165
401	262
402	302
403	495
404	119
405	158
406	152
407	153
408	171
409	330
410	217
411	161
412	230
413	180
414	114
415	177
416	94
417	244
418	309
419	258
420	322
421	153
422	181
423	174
424	289
425	325
426	768
427	516
428	176
429	193
430	319
431	190
432	105
433	263
434	136
435	111
436	126
437	213
438	382
439	205
440	169
441	186
442	317
443	191
444	354
445	411
446	127
447	180
448	174
449	270
450	450
451	280
452	248
453	307
454	370
455	573
456	178
457	249
458	245
459	191
460	169
461	372
462	216
463	179
464	204
465	117
466	142
467	181
468	187
469	201
470	74
471	155
472	194
473	263
474	367
475	206
476	226
477	190
478	229
479	367
480	349
481	152
482	211
483	123
484	277
485	202
486	339
487	392
488	151
489	352
490	219
491	183
492	117
493	168
494	163
495	102
496	190
497	344
498	139
499	120
500	219
501	166
502	202
503	374
504	164
505	119
506	159
507	243
508	239
509	560
510	303
511	221
512	112
513	201
514	191
515	146
516	174
517	273
518	149
519	266
520	256
521	169
522	206
523	451
524	235
525	369
526	181
527	419
528	195
529	358
530	150
531	135
532	166
533	160
534	222
535	169
536	159
537	288
538	216
539	150
540	65
541	123
542	204
543	147
544	143
545	84
546	158
547	102
548	169
549	155
550	256
551	269
552	200
553	177
554	273
555	315
556	512
557	215
558	250
559	287
560	233
561	196
562	382
563	150
564	247
565	225
566	917
567	213
568	222
569	132
570	359
571	308
572	255
573	221
574	129
575	194
576	225
577	262
578	178
579	262
580	358
581	185
582	108
583	227
584	293
585	511
586	173
587	117
588	328
589	352
590	204
591	278
592	147
593	176
594	126
595	147
596	287
597	142
598	297
599	297
600	127
601	125
602	101
603	145
604	251
605	210
606	128
607	150
608	145
609	112
610	276
611	146
612	183
613	172
614	229
615	223
616	185
617	316
618	138
619	180
620	316
621	457
622	179
623	361
624	284
625	135
626	364
627	429
628	213
629	135
630	221
631	155
632	277
633	69
634	323
635	113
636	199
637	143
638	132
639	89
640	332
641	428
642	177
643	119
644	196
645	159
646	248
647	616
648	231
649	215
650	101
651	191
652	134
653	79
654	173
655	134
1	1148
2	759
3	1396
4	921
5	1160
6	1547
7	921
8	523
9	1633
10	1480
11	2181
12	927
13	2274
14	2073
15	1669
16	1063
17	1901
18	1052
19	2590
20	1784
21	1221
22	1512
23	1520
24	2613
25	2298
26	718
27	1852
28	1197
29	1273
30	1027
31	2226
32	1824
33	1718
34	1832
35	901
36	871
37	2241
38	1507
39	2219
40	1968
41	2008
42	1400
43	597
44	1815
45	2197
46	1515
47	1519
48	832
49	1766
50	1065
51	1922
52	706
53	1341
54	901
55	1269
56	1886
57	2146
58	1418
59	2639
60	1453
61	935
62	611
63	2684
64	1189
65	688
66	853
67	1331
68	1314
69	1575
70	1347
71	1847
72	1820
73	1057
74	1540
75	978
76	731
77	1958
78	913
79	1127
80	932
81	1573
82	1481
83	802
84	1655
85	711
86	1477
87	2379
88	1291
89	1787
90	1359
91	459
92	1369
93	1679
94	1178
95	1777
96	2013
97	1026
98	1810
99	810
100	1272
101	699
102	1860
103	1256
104	662
105	1571
106	2095
107	469
108	999
109	1267
110	747
111	907
112	978
113	1086
114	1693
115	1972
116	1474
117	1486
118	1316
119	1383
120	1499
121	1054
122	967
123	887
124	623
125	1273
126	1877
127	2330
128	1101
129	875
130	529
131	1197
132	1625
133	1290
134	976
135	658
136	1782
137	2068
138	1574
139	1494
140	550
141	1292
142	1294
143	1233
144	1948
145	1712
146	1453
147	1214
148	915
149	627
150	775
151	638
152	946
153	1192
154	613
155	1250
156	1240
157	642
158	1221
159	914
160	564
161	1546
162	1715
163	625
164	649
165	1065
166	1131
167	1302
168	2447
169	890
170	2670
171	1136
172	685
173	1548
174	1744
175	639
176	674
177	1640
178	1877
179	547
180	1018
181	750
182	1136
183	929
184	859
185	585
186	1096
187	633
188	719
189	1748
190	2036
191	1058
192	1726
193	1054
194	1061
195	1323
196	777
197	670
198	734
199	527
200	1672
201	824
202	1020
203	1088
204	564
205	1532
206	1276
207	913
208	1120
209	631
210	727
211	1341
212	1270
213	510
214	2850
215	1456
216	1261
217	994
218	423
219	1173
220	934
221	1040
222	701
223	1543
224	989
225	1728
226	1827
227	1046
228	619
229	702
230	1066
231	739
232	1136
233	567
234	940
235	1154
236	657
237	833
238	473
239	1393
240	1003
241	2186
242	827
243	793
244	1120
245	940
246	757
247	769
248	525
249	2389
250	1994
251	1277
252	635
253	654
254	1180
255	856
256	1398
257	646
258	1375
259	1091
260	1136
261	1122
262	1060
263	793
264	471
265	1154
266	1668
267	1017
268	1284
269	870
270	711
271	1018
272	1308
273	778
274	1343
275	766
276	1333
277	550
278	1299
279	2025
280	974
281	786
282	1253
283	1485
284	810
285	679
286	1309
287	1595
288	405
289	766
290	919
291	727
292	1106
293	671
294	660
295	1004
296	697
297	1873
298	715
299	789
300	1418
301	1627
302	935
303	587
304	705
305	985
306	1235
307	629
308	1677
309	1226
310	1108
311	1118
312	1087
313	955
314	614
315	1379
316	679
317	511
318	1193
319	1118
320	675
321	1520
322	857
323	1543
324	692
325	441
326	917
327	769
328	522
329	532
330	1118
331	1538
332	1834
333	1121
334	1275
335	665
336	824
337	1447
338	1344
339	1264
340	580
341	696
342	1240
343	783
344	998
345	578
346	1385
347	1064
348	1076
349	547
350	699
351	2428
352	556
353	552
354	613
355	1505
356	771
357	588
358	499
359	425
360	969
361	617
362	1044
363	759
364	469
365	417
366	1022
367	892
368	1678
369	660
370	887
371	1193
372	747
373	743
374	2283
375	1367
376	1095
377	532
378	572
379	867
380	1049
381	555
382	1032
383	678
384	730
385	1097
386	1624
387	1727
388	635
389	585
390	798
391	840
392	779
393	1155
394	1097
395	716
396	596
397	1023
398	855
399	686
400	984
401	713
402	563
403	281
404	422
405	455
406	2148
407	212
408	421
409	433
410	363
411	199
412	269
413	134
414	177
415	131
416	213
417	298
418	213
419	379
420	158
421	81
422	446
423	419
424	397
425	289
426	473
427	446
428	417
429	118
430	194
431	306
432	529
433	226
434	188
435	81
436	113
437	260
438	178
439	365
440	179
441	195
442	166
443	145
444	155
445	65
446	124
447	114
448	193
449	620
450	241
451	155
452	281
453	104
454	113
455	288
456	221
457	254
458	126
459	74
460	105
461	199
462	191
463	210
464	229
465	245
466	263
467	98
468	88
469	182
470	179
471	155
472	172
473	153
474	174
475	319
476	158
477	239
478	333
479	388
480	113
481	145
482	849
483	341
484	290
485	294
486	283
487	437
488	104
489	420
490	98
491	151
492	355
493	414
494	275
495	215
496	309
497	275
498	206
499	405
500	275
501	141
502	182
503	286
504	190
505	178
506	423
507	253
508	225
509	313
510	183
511	182
512	216
513	279
514	352
515	248
516	264
517	286
518	101
519	317
520	346
521	90
522	463
523	159
524	103
525	166
526	155
527	179
528	154
529	111
530	130
531	210
532	320
533	164
534	187
535	237
536	222
537	196
538	353
539	1251
540	178
541	425
542	172
543	180
544	218
545	310
546	200
547	125
548	173
549	979
550	404
551	352
552	543
553	285
554	335
555	258
556	263
557	115
558	140
559	413
560	217
561	167
562	592
563	213
564	269
565	213
566	554
567	190
568	234
569	271
570	553
571	375
572	424
573	270
574	290
575	436
576	271
577	245
578	239
579	220
580	155
581	203
582	209
583	447
584	324
585	259
586	150
587	125
588	368
589	407
590	271
591	340
592	252
593	346
594	183
595	213
596	137
597	224
598	87
599	114
600	345
601	433
602	238
603	120
604	211
605	265
606	215
607	300
608	191
609	135
610	142
611	417
612	408
613	259
614	214
615	146
616	165
617	144
618	165
619	392
620	265
621	294
622	163
623	256
624	200
625	353
626	209
627	203
628	142
629	88
630	143
631	248
632	394
633	297
634	192
635	188
636	319
637	323
638	211
639	185
640	139
641	447
642	140
643	208
644	196
645	127
646	375
647	292
648	399
649	159
650	206
651	233
652	238
653	204
654	262
655	189
656	137
657	178
658	169
659	250
660	254
661	130
662	166
663	158
664	263
665	260
666	185
667	188
668	170
669	188
670	158
671	261
672	104
673	134
674	152
675	220
676	205
677	176
678	212
679	180
680	271
681	200
682	210
683	431
684	281
685	157
686	251
687	308
688	242
689	151
690	247
691	248
692	132
693	164
694	299
695	167
696	181
697	163
698	328
699	163
700	185
701	256
702	202
703	442
704	312
705	216
706	339
707	127
708	247
709	161
710	301
711	195
712	131
713	255
714	156
715	301
716	173
717	191
718	101
719	118
720	571
721	401
722	266
723	646
724	240
725	398
726	228
727	206
728	286
729	288
730	370
731	414
732	256
733	403
734	144
735	63
736	277
737	134
738	218
739	121
740	224
741	275
742	159
743	207
744	260
745	148
746	120
747	177
748	313
749	105
750	139
751	148
752	144
753	89
754	176
755	138
756	210
757	357
758	269
759	221
760	188
761	232
762	320
763	292
764	180
765	158
766	430
767	128
768	160
769	213
770	297
771	185
772	155
773	164
774	161
775	145
776	199
777	163
778	153
779	151
780	381
781	585
782	282
783	263
784	749
785	235
786	282
787	463
788	278
789	92
790	118
791	188
792	138
793	240
794	166
795	243
796	296
797	83
798	141
799	221
800	98
801	188
802	125
803	264
804	200
805	206
806	244
807	136
808	175
809	275
810	212
811	143
812	355
813	118
814	188
815	163
816	300
817	621
818	208
819	136
820	185
821	224
822	256
823	327
824	169
825	202
826	183
827	145
828	374
829	340
830	174
831	199
832	253
833	340
834	189
835	164
836	154
837	87
838	112
839	122
840	131
841	88
842	320
843	250
844	103
845	241
846	197
847	73
848	153
849	145
850	192
851	113
852	191
853	149
854	188
855	107
856	277
857	354
858	302
859	382
860	561
861	288
862	115
863	194
864	189
865	98
866	75
867	217
868	278
869	214
870	155
871	300
872	236
873	166
874	221
875	330
876	132
877	172
878	223
879	101
880	119
881	177
882	170
883	145
884	191
885	134
886	204
887	216
888	215
889	278
890	123
891	171
892	341
893	87
894	341
895	177
896	254
897	205
898	296
899	243
900	376
901	143
902	143
903	124
904	341
905	235
906	232
907	170
908	177
909	298
910	135
911	279
912	208
913	195
914	210
915	125
916	193
917	175
918	352
919	191
920	132
921	84
922	125
923	71
924	177
925	224
926	176
927	321
928	383
929	291
930	160
931	257
932	145
933	136
934	252
935	266
936	245
937	260
938	284
1	2431
2	2707
3	2010
4	2135
5	1189
6	395
7	1021
8	771
9	1767
10	3808
11	1685
12	1711
13	1051
14	293
15	1422
16	503
17	900
18	194
19	1005
20	1722
21	1337
22	311
23	217
24	1125
25	288
26	1310
27	695
28	921
29	1111
30	908
31	377
32	180
33	1810
34	1289
35	851
36	1157
37	540
38	935
39	564
40	566
41	313
42	226
43	275
44	340
45	256
46	1003
47	264
48	999
49	1695
50	531
51	1305
52	172
53	1639
54	547
55	1650
56	134
57	1727
58	712
59	1298
60	869
61	519
62	364
63	594
64	690
65	1713
66	1425
67	521
68	108
69	396
70	1232
71	518
72	774
73	1174
74	178
75	542
76	1036
77	775
78	162
79	428
80	426
81	236
82	526
83	396
84	1308
85	1426
86	1222
87	115
88	1867
89	313
90	593
91	393
92	300
93	155
94	250
95	245
96	782
97	1216
98	553
99	984
100	232
101	383
102	469
103	243
104	370
105	220
106	440
107	641
108	1363
109	970
110	984
111	977
112	1210
113	1182
114	1782
115	781
116	1284
117	1703
118	454
119	975
120	1559
121	832
122	1777
123	1433
124	2203
125	596
126	202
127	1112
128	90
129	1457
130	919
131	657
132	635
133	550
134	195
135	420
136	615
137	413
138	1431
139	984
140	671
141	349
142	641
143	594
144	1538
145	837
146	1611
147	922
148	491
149	427
150	675
151	296
152	524
153	1019
154	495
155	844
156	461
157	361
158	1082
159	872
160	966
161	485
162	1298
163	2639
164	1186
165	414
166	676
167	371
168	439
169	559
170	1041
171	349
172	203
173	464
174	450
175	373
176	168
177	142
178	266
179	281
180	564
181	204
182	199
183	555
184	140
185	242
186	224
187	449
188	1452
189	1290
190	980
191	484
192	293
193	263
194	938
195	658
196	281
197	283
198	428
199	1034
200	782
201	263
202	306
203	1412
204	475
205	829
206	719
207	757
208	1169
209	639
210	1424
211	185
212	1213
213	242
214	221
215	418
216	395
217	456
218	199
219	158
220	191
221	365
222	483
223	669
224	554
225	1467
226	264
227	186
228	104
229	169
230	1056
231	533
232	1477
233	1777
234	1524
235	301
236	822
237	256
238	178
239	99
240	649
241	380
242	632
243	2591
244	1326
245	548
246	815
247	514
248	1036
249	706
250	350
251	201
252	223
253	390
254	276
255	357
256	367
257	533
258	926
259	117
260	256
261	294
262	553
263	288
264	270
265	290
266	664
267	919
268	1338
269	174
270	250
271	150
272	143
273	90
274	262
275	97
276	466
277	701
278	786
279	1004
280	1000
281	857
282	649
283	1162
284	1107
285	921
286	1191
287	243
288	165
289	155
290	966
291	542
292	166
293	460
294	232
295	443
296	215
297	228
298	179
299	256
300	390
301	1090
302	566
303	191
304	579
305	907
306	880
307	1234
308	502
309	172
310	313
311	734
312	585
313	1010
314	328
315	239
316	1417
317	337
318	221
319	136
320	363
321	148
322	308
323	277
324	732
325	410
326	125
327	100
328	186
329	185
330	237
331	548
332	213
333	156
334	144
335	690
336	125
337	155
338	120
339	166
340	302
341	324
342	439
343	256
344	378
345	569
346	480
347	916
348	382
349	1058
350	391
351	273
352	104
353	544
354	506
355	1593
356	553
357	141
358	265
359	146
360	264
361	86
362	299
363	345
364	198
365	354
366	510
367	254
368	235
369	230
370	557
371	755
372	1000
373	392
374	571
375	283
376	502
377	431
378	1295
379	884
380	1065
381	557
382	1323
383	1383
384	845
385	574
386	1365
387	140
388	982
389	193
390	313
391	110
392	147
393	178
394	123
395	233
396	118
397	981
398	231
399	589
400	932
401	1156
402	648
403	1730
404	626
[truncated: 958 more rows]

## Sheet: Expt8_050220
Muscle-Cre_Dll4f/f		30d after tmx_injure muscle_14d regeneration
Expt 8_050220
	CSA (μm2)
1	811
2	1000
3	946
4	528
5	378
6	2349
7	514
8	689
9	1715
10	1252
11	730
12	864
13	613
14	2124
15	1791
16	1057
17	1285
18	528
19	1245
20	744
21	487
22	1157
23	1812
24	1337
25	649
26	827
27	1053
28	1096
29	1271
30	695
31	845
32	796
33	754
34	433
35	944
36	882
37	600
38	1041
39	1626
40	792
41	1318
42	2761
43	687
44	583
45	585
46	1641
47	879
48	986
49	611
50	2282
51	773
52	441
53	1432
54	744
55	973
56	446
57	1562
58	481
59	788
60	897
61	1911
62	835
63	651
64	1115
65	666
66	573
67	1447
68	382
69	1020
70	787
71	1112
72	818
73	1510
74	1131
75	888
76	714
77	1724
78	1027
79	720
80	1044
81	1214
82	1131
83	799
84	834
85	708
86	992
87	567
88	605
89	2314
90	2688
91	1118
92	1140
93	728
94	809
95	624
96	1642
97	2267
98	1017
99	1149
100	819
101	828
102	1104
103	653
104	548
105	1378
106	765
107	837
108	968
109	1321
110	1133
111	1145
112	1682
113	755
114	694
115	746
116	2064
117	456
118	532
119	1682
120	659
121	439
122	795
123	889
124	540
125	1255
126	1673
127	1068
128	764
129	721
130	2289
131	891
132	787
133	617
134	1000
135	905
136	1653
137	1053
138	573
139	621
140	1047
141	1879
142	726
143	1421
144	1684
145	1363
146	479
147	995
148	1105
149	896
150	394
151	636
152	982
153	1757
154	655
155	830
156	615
157	1683
158	606
159	2069
160	346
161	656
162	560
163	774
164	762
165	643
166	838
167	2410
168	752
169	1130
170	923
171	1603
172	1944
173	908
174	873
175	841
176	410
177	758
178	867
179	1205
180	459
181	1531
182	1130
183	1834
184	592
185	619
186	1224
187	2683
188	974
189	1057
190	1273
191	775
192	725
193	1195
194	690
195	910
196	1036
197	548
198	939
199	525
200	663
201	1012
202	1262
203	681
204	771
205	1272
206	1220
207	1574
208	537
209	1546
210	633
211	648
212	854
213	698
214	820
215	722
216	553
217	748
218	548
219	1005
220	825
221	695
222	693
223	707
224	843
225	460
226	428
227	1632
228	965
229	596
230	1513
231	536
232	799
233	1195
234	2140
235	2259
236	714
237	1176
238	1045
239	1166
240	714
241	577
242	617
243	809
244	512
245	455
246	474
247	1461
248	760
249	2294
250	1576
251	1088
252	1308
253	613
254	873
255	665
256	1656
257	518
258	1229
259	858
260	894
261	643
262	509
263	437
264	790
265	1063
266	1188
267	1221
268	1780
269	766
270	824
271	537
272	825
273	872
274	667
275	481
276	456
277	1303
278	1459
279	668
280	1070
281	583
282	1128
283	2136
284	980
285	690
286	653
287	788
288	2157
289	595
290	521
291	547
292	600
293	1009
294	1034
295	528
296	480
297	593
298	780
299	772
300	829
301	903
302	709
303	1035
304	655
305	1475
306	1217
307	921
308	2690
309	747
310	741
311	1186
312	1439
313	428
314	763
315	894
316	1050
317	3239
318	611
319	907
320	1281
321	425
322	628
323	1984
324	958
325	736
326	722
327	1282
328	597
329	671
330	529
331	824
332	801
333	587
334	863
335	804
336	959
337	1504
338	617
339	2894
340	635
341	1427
342	761
343	586
344	1857
345	2003
346	697
347	1068
348	897
349	1118
350	546
351	557
352	630
353	1149
354	461
355	513
356	579
357	1404
358	462
359	694
360	1453
361	501
362	1322
363	547
364	778
365	597
366	591
367	919
368	603
369	697
370	906
371	930
372	949
373	882
374	1468
375	728
376	798
377	615
378	818
379	793
380	1022
381	894
382	401
383	707
384	1690
385	704
386	2589
387	542
388	1234
389	1242
390	3117
391	990
392	606
393	684
394	661
395	837
396	2301
397	637
398	1115
399	433
400	797
401	606
402	854
403	825
404	665
405	1358
406	503
407	1876
408	1358
409	1145
410	625
411	497
412	553
413	428
414	588
415	1794
416	1115
417	1115
418	941
419	829
420	1790
421	1052
422	769
423	1278
424	1116
425	1564
426	2633
427	433
428	658
429	2031
430	784
431	939
432	582
433	740
434	862
435	532
436	730
437	662
438	799
439	642
440	937
441	642
442	593
443	2190
444	630
445	729
446	602
447	2072
448	820
449	798
450	572
451	626
452	648
453	467
454	581
455	949
456	548
457	606
458	1330
459	509
460	619
461	1049
462	656
463	627
464	439
465	603
466	525
467	636
468	598
469	1803
470	702
471	1262
472	997
473	1439
474	660
475	731
476	640
477	730
478	638
479	440
480	673
481	531
482	482
483	520
484	633
485	647
486	510
487	640
488	742
489	1238
490	1006
491	1193
492	540
493	690
494	713
495	531
496	754
497	421
498	1866
499	486
500	831
501	523
502	538
503	497
504	726
505	433
506	814
507	590
508	830
509	738
510	611
511	962
512	533
513	148
514	388
515	260
516	240
517	235
518	213
519	237
520	298
521	304
522	315
523	496
524	230
525	213
526	378
527	431
528	386
529	247
530	96
531	148
532	406
533	452
534	490
535	229
536	325
537	402
538	235
539	133
540	639
541	142
542	250
543	204
544	545
545	225
546	132
547	178
548	299
549	270
550	234
551	57
552	233
553	327
554	557
555	246
556	631
557	376
558	183
559	685
560	119
561	144
562	331
563	155
564	87
565	397
566	120
567	395
568	323
569	92
570	131
571	90
572	294
573	186
574	455
575	242
576	159
577	161
578	113
579	629
580	292
581	117
582	288
583	236
584	162
585	227
586	451
587	335
588	237
589	278
590	334
591	356
592	419
593	167
594	236
595	234
596	217
597	360
598	339
599	248
600	311
601	201
602	226
603	259
604	175
605	264
606	395
607	138
608	329
609	146
610	569
611	206
612	289
613	194
614	264
615	369
616	332
617	250
618	285
619	279
620	206
621	409
622	229
623	369
624	308
625	277
626	273
627	517
628	168
629	381
630	440
631	581
632	437
633	490
634	281
635	326
636	357
637	399
638	209
639	318
640	197
641	488
642	676
643	170
644	192
645	308
646	212
647	449
648	117
649	162
650	119
651	356
652	363
653	505
654	269
655	443
656	348
657	481
658	612
659	435
660	397
661	431
662	264
663	662
664	459
665	173
666	328
667	320
668	226
669	244
670	203
671	406
672	443
673	204
674	213
675	322
676	308
677	312
678	341
679	172
680	337
681	93
682	328
683	131
684	368
685	532
686	329
687	185
688	129
689	219
690	247
691	395
692	275
693	258
694	117
695	242
696	203
697	279
698	134
699	282
700	266
701	480
702	406
703	234
704	267
705	199
706	371
707	67
708	547
709	128
710	328
711	459
712	389
713	254
714	219
715	145
716	282
717	151
718	178
719	229
720	504
721	519
722	261
723	452
724	399
725	198
726	290
727	160
728	355
729	294
730	194
731	222
732	151
733	277
734	334
735	245
736	117
737	269
738	432
739	265
740	501
741	150
742	232
743	378
744	253
745	516
746	123
747	186
748	217
749	174
750	311
751	234
752	469
753	216
754	201
755	327
756	217
757	177
758	448
759	146
760	224
761	540
762	527
763	555
764	607
765	267
766	169
767	166
768	128
769	142
770	139
771	118
772	222
773	185
774	417
775	150
776	463
777	316
778	346
779	181
780	177
781	341
782	164
783	76
784	185
785	308
786	321
787	335
788	450
789	280
790	420
791	198
792	206
793	300
794	214
795	141
796	161
797	311
798	373
799	635
800	321
801	346
802	285
803	534
804	423
805	190
806	174
807	235
808	295
809	255
810	279
811	316
812	221
813	284
814	434
815	407
816	232
817	210
818	213
819	240
820	241
821	330
822	332
823	360
824	650
825	128
826	185
827	126
828	391
829	386
830	235
831	298
832	634
833	407
834	417
835	342
836	379
837	317
838	241
839	380
840	401
841	305
842	270
843	505
844	472
845	121
846	429
847	131
848	212
849	495
850	678
851	322
852	274
853	376
854	618
855	212
856	401
857	286
858	244
859	412
860	601
861	107
862	305
863	384
864	605
865	159
866	413
867	158
868	74
869	350
870	210
871	485
872	242
873	334
874	282
875	171
876	333
877	292
878	314
879	129
880	195
881	265
882	171
883	117
884	272
885	273
886	559
887	407
888	760
889	125
890	125
891	440
892	97
893	234
894	326
895	90
896	202
897	264
898	392
899	494
900	308
901	316
902	270
903	302
904	251
905	250
906	335
907	393
908	373
909	266
910	292
911	195
912	121
913	174
914	241
915	457
916	379
917	530
918	108
919	147
920	86
921	326
922	276
923	164
924	138
925	273
926	211
927	606
928	333
929	334
930	211
931	283
932	480
933	493
934	308
935	330
936	522
937	324
938	543
939	261
940	248
941	399
942	125
943	271
944	694
945	353
946	406
947	187
948	398
949	401
950	577
951	364
952	354
953	130
954	82
955	144
956	339
957	423
958	365
959	313
960	429
961	521
962	504
963	382
964	420
965	287
966	249
967	506
968	278
969	178
970	463
971	485
972	202
973	219
974	180
975	196
976	529
977	540
978	406
979	422
980	523
981	670
982	323
983	161
984	159
985	316
986	243
987	477
988	957
989	438
990	482
991	282
992	258
993	403
994	239
995	528
996	624
997	426
998	170
999	351
1000	282
1001	462
1002	256
1003	196
1004	128
1005	172
1006	460
1007	310
1008	268
1009	161
1010	408
1011	232
1012	152
1013	211
1014	236
1015	490
1016	378
1017	259
1018	498
1019	443
1020	194
1021	256
1022	185
1023	149
1024	357
1025	95
1026	92
1027	575
1028	166
1029	334
1030	495
1031	387
1032	241
1033	363
1034	361
1035	409
1036	417
1037	282
1038	278
1039	373
1040	560
1041	647
1042	476
1043	509
1044	436
1045	141
1046	278
1047	350
1048	353
1049	306
1050	328
1051	513
1052	612
1053	289
1054	196
1055	499
1056	438
1057	160
1058	238
1059	361
1060	516
1061	314
1062	226
1063	358
1064	406
1065	477
1066	79
1067	436
1068	341
1069	277
1070	195
1071	101
1072	295
1073	531
1074	226
1075	165
1076	328
1077	283
1078	103
1079	171
1080	240
1081	355
1082	84
1083	344
1084	259
1085	176
1086	204
1087	220
1088	233
1089	245
1090	378
1091	270
1092	168
1093	121
1094	402
1095	67
1096	298
1097	257
1098	155
1099	259
1100	287
1101	226
1102	256
1103	114
1104	191
1105	230
1106	211
1107	173
1108	294
1109	232
1110	132
1111	85
1112	545
1113	263
1114	181
1115	213
1116	114
1117	118
1118	361
1119	251
1120	291
1121	132
1122	101
1123	153
1124	178
1125	231
1126	186
1127	218
1128	265
1129	96
1130	83
1131	86
1132	278
1133	322
1134	160
1135	450
1136	363
1137	237
1138	422
1139	83
1140	165
1141	187
1142	277
1143	78
1144	133
1145	83
1146	390
1147	355
1148	319
1149	229
1150	193
1151	208
1152	166
1153	97
1154	270
1155	152
1156	237
1157	332
1158	185
1159	422
1160	139
1161	157
1162	346
1163	213
1164	359
1165	349
1166	225
1167	221
1168	226
1169	149
1170	240
1171	584
1172	270
1173	279
1174	540
1175	375
1176	155
1177	384
1178	177
1179	348
1180	501
1181	264
1182	93
1183	130
1184	296
1185	306
1186	199
1187	159
1188	192
1189	177
1190	172
1191	75
1192	272
1193	226
1194	144
1195	222
1196	477
1197	403
1198	380
1199	441
1200	169
1201	374
1202	333
1203	119
1204	177
1	1064
2	705
3	536
4	874
5	1794
6	3365
7	1627
8	1237
9	953
10	2032
11	1442
12	1677
13	1257
14	872
15	1289
16	543
17	1999
18	1005
19	473
20	1144
21	1107
22	564
23	2289
24	837
25	1475
26	1240
27	1034
28	703
29	1891
30	771
31	705
32	1530
33	2425
34	2638
35	1104
36	1513
37	770
38	977
39	1345
40	867
41	1712
42	597
43	1683
44	902
45	961
46	963
47	1377
48	1338
49	1652
50	938
51	781
52	884
53	1127
54	865
55	910
56	1049
57	728
58	1013
59	1545
60	1162
61	768
62	1699
63	485
64	929
65	1576
66	3806
67	1219
68	790
69	1773
70	1401
71	977
72	883
73	535
74	786
75	1051
76	681
77	763
78	572
79	588
80	865
81	532
82	1095
83	857
84	1257
85	1047
86	741
87	1113
88	1192
89	582
90	1517
91	1041
92	391
93	908
94	1161
95	1328
96	1067
97	951
98	679
99	1719
100	681
101	981
102	1503
103	1033
104	785
105	1364
106	1736
107	2061
108	925
109	1926
110	610
111	760
112	1429
113	1665
114	1008
115	1346
116	1514
117	1022
118	1587
119	1657
120	2090
121	1283
122	1059
123	2036
124	2053
125	772
126	1075
127	1333
128	1657
129	671
130	692
131	2253
132	909
133	938
134	460
135	871
136	545
137	1522
138	734
139	634
140	573
141	1071
142	1287
143	997
144	2652
145	785
146	2072
147	984
148	3660
149	1973
150	1802
151	1307
152	1759
153	869
154	983
155	1300
156	1241
157	568
158	1191
159	1298
160	1764
161	943
162	537
163	1024
164	1899
165	745
166	1039
167	977
168	2428
169	1297
170	914
171	1271
172	1464
173	799
174	2873
175	885
176	1890
177	1640
178	3205
179	2644
180	930
181	2464
182	676
183	556
184	1722
185	712
186	2190
187	933
188	783
189	1379
190	572
191	1004
192	815
193	959
194	1148
195	1867
196	629
197	872
198	653
199	1016
200	708
201	777
202	1659
203	850
204	711
205	704
206	1722
207	1756
208	755
209	1524
210	1909
211	1103
212	1071
213	1367
214	1428
215	1015
216	644
217	2393
218	820
219	2089
220	1151
221	1450
222	2376
223	1284
224	628
225	900
226	755
227	1710
228	1117
229	2350
230	1325
231	1139
232	1342
233	538
234	1270
235	2750
236	1424
237	1136
238	682
239	1169
240	842
241	1345
242	645
243	802
244	880
245	2045
246	724
247	966
248	838
249	1447
250	1086
251	633
252	1810
253	1091
254	1770
255	1338
256	1280
257	1862
258	958
259	913
260	1123
261	772
262	1157
263	1273
264	1584
265	929
266	1108
267	1182
268	1180
269	1191
270	1141
271	836
272	883
273	1910
274	1107
275	1840
276	661
277	863
278	916
279	1140
280	1275
281	781
282	2206
283	509
284	1055
285	2404
286	1549
287	1138
288	719
289	931
290	1633
291	785
292	770
293	1554
294	1084
295	714
296	779
297	1120
298	967
299	1500
300	1037
301	1682
302	1243
303	1038
304	614
305	1000
306	1169
307	985
308	1647
309	622
310	1000
311	1727
312	548
313	537
314	1011
315	1009
316	1330
317	1844
318	2140
319	1199
320	915
321	529
322	1627
323	1299
324	1096
325	809
326	1353
327	1020
328	602
329	1758
330	1179
331	758
332	1153
333	833
334	986
335	1012
336	801
337	1775
338	1486
339	1711
340	1432
341	861
342	883
343	589
344	1684
345	1612
346	646
347	649
348	2559
349	1434
350	965
351	1427
352	1509
353	458
354	1448
355	984
356	1040
357	1087
358	2293
359	1941
360	724
361	2073
362	1457
363	962
364	1344
365	561
366	572
367	788
368	1703
369	661
370	542
371	459
372	1393
373	788
374	1293
375	701
376	918
377	739
378	1668
379	462
380	1646
381	1041
382	2444
383	887
384	1004
385	815
386	1228
387	950
388	1647
389	1465
390	915
391	442
392	774
393	521
394	739
395	2365
396	622
397	2512
398	2156
399	2382
400	2497
401	1732
402	1600
403	983
404	627
405	1540
406	949
407	916
408	1570
409	814
410	798
411	837
412	567
413	1247
414	2260
415	1914
416	2264
417	1251
418	910
419	1077
420	889
421	1077
422	1245
423	1164
424	2211
425	1766
426	1097
427	1488
428	721
429	1105
430	1065
431	697
432	525
433	1345
434	2347
435	1231
436	819
437	1310
438	761
439	720
440	1767
441	858
442	2276
443	661
444	830
445	1707
446	1266
447	1145
448	2555
449	2545
450	958
451	853
452	818
453	1798
454	815
455	698
456	871
457	754
458	1273
459	817
460	693
461	937
462	1129
463	1251
464	2101
465	513
466	981
467	462
468	440
469	852
470	636
471	284
472	311
473	258
474	704
475	654
476	100
477	535
478	797
479	225
480	290
481	197
482	692
483	292
484	57
485	208
486	157
487	485
488	150
489	202
490	415
491	129
492	411
493	125
494	180
495	556
496	434
497	189
498	506
499	475
500	203
501	159
502	388
503	208
504	237
505	124
506	422
507	169
508	259
509	250
510	244
511	310
512	103
513	183
514	332
515	114
516	90
517	275
518	368
519	273
520	419
521	419
522	373
523	297
524	153
525	156
526	184
527	232
528	653
529	426
530	148
531	435
532	438
533	173
534	316
535	191
536	392
537	321
538	191
539	372
540	326
541	461
542	365
543	368
544	435
545	213
546	290
547	121
548	554
549	338
550	268
551	156
552	252
553	360
554	238
555	390
556	555
557	556
558	402
559	410
560	283
561	887
562	277
563	124
564	271
565	457
566	425
567	303
568	231
569	813
570	261
571	245
572	2150
573	184
574	171
575	244
576	243
577	233
578	580
579	437
580	152
581	196
582	466
583	470
584	170
585	310
586	177
587	365
588	93
589	230
590	332
591	638
592	370
593	326
594	318
595	293
596	578
597	202
598	364
599	263
600	548
601	214
602	352
603	972
604	903
605	456
606	283
607	217
608	402
609	165
610	207
611	107
612	204
613	275
614	76
615	111
616	120
617	341
618	177
619	182
620	552
621	123
622	102
623	130
624	359
625	258
626	409
627	220
628	161
629	267
630	443
631	154
632	422
633	626
634	493
635	118
636	169
637	645
638	780
639	293
640	428
641	371
642	261
643	175
644	112
645	296
646	378
647	314
648	610
649	457
650	281
651	143
652	139
653	305
654	370
655	336
656	349
657	251
658	284
659	1374
660	342
661	299
662	317
663	220
664	138
665	295
666	211
667	458
668	216
669	131
670	186
671	246
672	228
673	144
674	635
675	179
676	248
677	237
678	226
679	319
680	390
681	135
682	617
683	294
684	166
685	372
686	159
687	180
688	112
689	132
690	447
691	216
692	83
693	178
694	125
695	142
696	259
697	162
698	333
699	173
700	316
701	131
702	134
703	259
704	406
705	186
706	136
707	133
708	81
709	195
710	293
711	193
712	148
713	270
714	178
715	281
716	227
717	216
718	430
719	221
720	216
721	123
722	163
723	311
724	192
725	120
726	95
727	354
728	162
729	186
730	289
731	169
732	178
733	199
734	83
735	180
736	110
737	222
738	244
739	221
740	141
741	117
742	338
743	146
744	215
745	162
746	294
747	175
748	197
749	239
750	181
751	279
752	190
753	170
754	188
755	87
756	170
757	161
758	274
759	85
760	218
761	183
762	199
763	350
764	316
765	158
766	329
767	283
768	200
769	122
770	401
771	153
772	151
773	315
774	233
775	260
776	199
777	120
778	169
779	191
780	176
1	589
2	159
3	214
4	263
5	187
6	99
7	313
8	150
9	120
10	635
11	175
12	193
13	258
[truncated: 864 more rows]
