# Supplementary material for: Heterogeneous levels of delta-like 4 within a multinucleated niche cell maintains muscle stem cell diversity
Source: eLife. 2022 Dec 30;11:e68180. doi: 10.7554/eLife.68180 (PMC9803355; doi:10.7554/eLife.68180)
Supplement: Figure 5—source data 6. [file elife-68180-fig5-data6.xlsx]

## Sheet: Ctrl1_CL TA_Pax7
Item	Source	Pax7 (Cy5) Mean Intensity	Cy5 background	Pax7 intensity- background intensity	Corrected minus to zeros
1	C1_14D regen contral lateral_Pax7 035.nd2	1579.45	641.03	938.42	938.42
2	C1_14D regen contral lateral_Pax7 035.nd2	1286.72	460.1	826.62	826.62
3	C1_14D regen contral lateral_Pax7 035.nd2	820.77	364.04	456.73	456.73
4	C1_14D regen contral lateral_Pax7 034.nd2	1307.54	341.37	966.17	966.17
5	C1_14D regen contral lateral_Pax7 034.nd2	1307.6	490.25	817.35	817.35
6	C1_14D regen contral lateral_Pax7 034.nd2	802.41	302.46	499.95	499.95
7	C1_14D regen contral lateral_Pax7 033.nd2	1231.09	366.56	864.53	864.53
8	C1_14D regen contral lateral_Pax7 032.nd2	1084.68	394.52	690.16	690.16
9	C1_14D regen contral lateral_Pax7 031.nd2	1127.24	468.5	658.74	658.74
10	C1_14D regen contral lateral_Pax7 031.nd2	1000.63	336.89	663.74	663.74
11	C1_14D regen contral lateral_Pax7 031.nd2	942.43	346.75	595.68	595.68
12	C1_14D regen contral lateral_Pax7 031.nd2	808.4	324.78	483.62	483.62
13	C1_14D regen contral lateral_Pax7 030.nd2	1228.84	444.89	783.95	783.95
14	C1_14D regen contral lateral_Pax7 030.nd2	533.06	237.3	295.76	295.76
15	C1_14D regen contral lateral_Pax7 029.nd2	1277.61	450.79	826.82	826.82
16	C1_14D regen contral lateral_Pax7 029.nd2	1125.29	504.68	620.61	620.61
17	C1_14D regen contral lateral_Pax7 028.nd2	1320.3	513.96	806.34	806.34
18	C1_14D regen contral lateral_Pax7 028.nd2	908.46	423.9	484.56	484.56
19	C1_14D regen contral lateral_Pax7 028.nd2	649.32	391.74	257.58	257.58
20	C1_14D regen contral lateral_Pax7 028.nd2	1498.81	613.45	885.36	885.36
21	C1_14D regen contral lateral_Pax7 028.nd2	1613.99	529.23	1084.76	1084.76
22	C1_14D regen contral lateral_Pax7 027.nd2	1494.55	569.86	924.69	924.69
23	C1_14D regen contral lateral_Pax7 027.nd2	1275.99	662.2	613.79	613.79
24	C1_14D regen contral lateral_Pax7 027.nd2	1690.73	658.33	1032.4	1032.4
25	C1_14D regen contral lateral_Pax7 026.nd2	1116.2	310.19	806.01	806.01
26	C1_14D regen contral lateral_Pax7 026.nd2	1002.24	270.42	731.82	731.82
27	C1_14D regen contral lateral_Pax7 026.nd2	1069.5	410.6	658.9	658.9
28	C1_14D regen contral lateral_Pax7 026.nd2	522.17	341.18	180.99	180.99
29	C1_14D regen contral lateral_Pax7 026.nd2	543.42	364.33	179.09	179.09
30	C1_14D regen contral lateral_Pax7 026.nd2	465.82	289.29	176.53	176.53
31	C1_14D regen contral lateral_Pax7 025.nd2	582.94	339.66	243.28	243.28
32	C1_14D regen contral lateral_Pax7 025.nd2	663.65	312.89	350.76	350.76
33	C1_14D regen contral lateral_Pax7 025.nd2	802.88	286.39	516.49	516.49
34	C1_14D regen contral lateral_Pax7 025.nd2	504.25	259.54	244.71	244.71
35	C1_14D regen contral lateral_Pax7 025.nd2	780.56	330.78	449.78	449.78
36	C1_14D regen contral lateral_Pax7 024.nd2	1046.75	397.74	649.01	649.01
37	C1_14D regen contral lateral_Pax7 024.nd2	625.08	345.44	279.64	279.64
38	C1_14D regen contral lateral_Pax7 023.nd2	1389.12	529.44	859.68	859.68
39	C1_14D regen contral lateral_Pax7 023.nd2	1329.52	558.1	771.42	771.42
40	C1_14D regen contral lateral_Pax7 023.nd2	1172.81	469.3	703.51	703.51
41	C1_14D regen contral lateral_Pax7 023.nd2	539.68	373.82	165.86	165.86
42	C1_14D regen contral lateral_Pax7 023.nd2	619.95	393.33	226.62	226.62
43	C1_14D regen contral lateral_Pax7 022.nd2	1148.98	604.28	544.7	544.7
44	C1_14D regen contral lateral_Pax7 022.nd2	1601.59	594.48	1007.11	1007.11
45	C1_14D regen contral lateral_Pax7 022.nd2	1536.83	677.65	859.18	859.18
46	C1_14D regen contral lateral_Pax7 021.nd2	1601.81	499.98	1101.83	1101.83
47	C1_14D regen contral lateral_Pax7 021.nd2	1112.33	480.1	632.23	632.23
48	C1_14D regen contral lateral_Pax7 020.nd2	542.65	290.81	251.84	251.84
49	C1_14D regen contral lateral_Pax7 019.nd2	1523.79	389.64	1134.15	1134.15
50	C1_14D regen contral lateral_Pax7 019.nd2	455.62	275.61	180.01	180.01
51	C1_14D regen contral lateral_Pax7 019.nd2	685.93	284.98	400.95	400.95
52	C1_14D regen contral lateral_Pax7 019.nd2	461.02	379.56	81.46	81.46
53	C1_14D regen contral lateral_Pax7 018.nd2	1184.55	351.01	833.54	833.54
54	C1_14D regen contral lateral_Pax7 018.nd2	711.78	280.54	431.24	431.24
55	C1_14D regen contral lateral_Pax7 018.nd2	888.13	290.1	598.03	598.03
56	C1_14D regen contral lateral_Pax7 017.nd2	958.58	310.95	647.63	647.63
57	C1_14D regen contral lateral_Pax7 017.nd2	1005.8	287.24	718.56	718.56
58	C1_14D regen contral lateral_Pax7 017.nd2	474.23	239.86	234.37	234.37
59	C1_14D regen contral lateral_Pax7 016.nd2	582.48	353.56	228.92	228.92
60	C1_14D regen contral lateral_Pax7 016.nd2	873.26	338.32	534.94	534.94
61	C1_14D regen contral lateral_Pax7 015.nd2	966.43	263.69	702.74	702.74
62	C1_14D regen contral lateral_Pax7 015.nd2	607.77	261.61	346.16	346.16
63	C1_14D regen contral lateral_Pax7 015.nd2	914.01	283.17	630.84	630.84
64	C1_14D regen contral lateral_Pax7 015.nd2	483.84	271.99	211.85	211.85
65	C1_14D regen contral lateral_Pax7 014.nd2	931.49	326.94	604.55	604.55
66	C1_14D regen contral lateral_Pax7 013.nd2	1400.02	444.45	955.57	955.57
67	C1_14D regen contral lateral_Pax7 013.nd2	832.4	390.19	442.21	442.21
68	C1_14D regen contral lateral_Pax7 013.nd2	917.73	444.14	473.59	473.59
69	C1_14D regen contral lateral_Pax7 012.nd2	715.66	418.03	297.63	297.63
70	C1_14D regen contral lateral_Pax7 012.nd2	1203.51	558.53	644.98	644.98
71	C1_14D regen contral lateral_Pax7 012.nd2	1670.4	450.36	1220.04	1220.04
72	C1_14D regen contral lateral_Pax7 011.nd2	1548.65	484.84	1063.81	1063.81
73	C1_14D regen contral lateral_Pax7 011.nd2	628.65	384.36	244.29	244.29
74	C1_14D regen contral lateral_Pax7 011.nd2	907.43	377.82	529.61	529.61
75	C1_14D regen contral lateral_Pax7 010.nd2	1221.82	389.46	832.36	832.36
76	C1_14D regen contral lateral_Pax7 010.nd2	975.92	391.54	584.38	584.38
77	C1_14D regen contral lateral_Pax7 010.nd2	1383.15	552.82	830.33	830.33
78	C1_14D regen contral lateral_Pax7 010.nd2	886.29	454.87	431.42	431.42
79	C1_14D regen contral lateral_Pax7 010.nd2	1219.15	543.9	675.25	675.25
80	C1_14D regen contral lateral_Pax7 009.nd2	1218.08	453.95	764.13	764.13
81	C1_14D regen contral lateral_Pax7 009.nd2	635.3	415.07	220.23	220.23
82	C1_14D regen contral lateral_Pax7 009.nd2	799.77	360.31	439.46	439.46
83	C1_14D regen contral lateral_Pax7 009.nd2	1352.46	408.97	943.49	943.49
84	C1_14D regen contral lateral_Pax7 009.nd2	486.46	257.18	229.28	229.28
85	C1_14D regen contral lateral_Pax7 008.nd2	881.24	354.89	526.35	526.35
86	C1_14D regen contral lateral_Pax7 008.nd2	863.79	347.66	516.13	516.13
87	C1_14D regen contral lateral_Pax7 008.nd2	1060.09	355.33	704.76	704.76
88	C1_14D regen contral lateral_Pax7 007.nd2	732.46	550.22	182.24	182.24
89	C1_14D regen contral lateral_Pax7 007.nd2	987.86	418.96	568.9	568.9
90	C1_14D regen contral lateral_Pax7 007.nd2	1311.78	335.8	975.98	975.98
91	C1_14D regen contral lateral_Pax7 007.nd2	1090.03	407.62	682.41	682.41
92	C1_14D regen contral lateral_Pax7 006.nd2	1389.14	453.67	935.47	935.47
93	C1_14D regen contral lateral_Pax7 005.nd2	1108.9	372.96	735.94	735.94
94	C1_14D regen contral lateral_Pax7 005.nd2	1069.26	355.56	713.7	713.7
95	C1_14D regen contral lateral_Pax7 005.nd2	1062.06	379.66	682.4	682.4
96	C1_14D regen contral lateral_Pax7 005.nd2	552.23	335.25	216.98	216.98
97	C1_14D regen contral lateral_Pax7 005.nd2	709.07	326.75	382.32	382.32
98	C1_14D regen contral lateral_Pax7 004.nd2	897.57	314.69	582.88	582.88
99	C1_14D regen contral lateral_Pax7 004.nd2	511.95	300.23	211.72	211.72
100	C1_14D regen contral lateral_Pax7 004.nd2	731.21	309.57	421.64	421.64
101	C1_14D regen contral lateral_Pax7 004.nd2	770.97	272.59	498.38	498.38
102	C1_14D regen contral lateral_Pax7 003.nd2	1356.47	373.01	983.46	983.46
103	C1_14D regen contral lateral_Pax7 003.nd2	1274.91	322.61	952.3	952.3
104	C1_14D regen contral lateral_Pax7 003.nd2	926.97	326.18	600.79	600.79
105	C1_14D regen contral lateral_Pax7 003.nd2	919.78	314.88	604.9	604.9
106	C1_14D regen contral lateral_Pax7 002.nd2	1722.71	556.73	1165.98	1165.98
107	C1_14D regen contral lateral_Pax7 002.nd2	716.09	353.95	362.14	362.14
108	C1_14D regen contral lateral_Pax7 001.nd2	1093.56	354.41	739.15	739.15
109	C1_14D regen contral lateral_Pax7 001.nd2	634.15	338.74	295.41	295.41
110	C1_14D regen contral lateral_Pax7 001.nd2	1352.52	511.16	841.36	841.36

## Sheet: Ctrl3_CL TA_Pax7
Item	Source	Pax7 (Cy5) Mean Intensity	Cy5 background	Pax7 intensity- background intensity	Corrected minus to zeros
1	C3_14d regen contral lateral TA_Pax7 030.nd2	1723.01	554	1169.01	1169.01
2	C3_14d regen contral lateral TA_Pax7 030.nd2	506.62	325.48	181.14	181.14
3	C3_14d regen contral lateral TA_Pax7 030.nd2	583.59	239.32	344.27	344.27
4	C3_14d regen contral lateral TA_Pax7 029.nd2	1035.5	427.43	608.07	608.07
5	C3_14d regen contral lateral TA_Pax7 029.nd2	657.65	285.96	371.69	371.69
6	C3_14d regen contral lateral TA_Pax7 029.nd2	631.12	284.19	346.93	346.93
7	C3_14d regen contral lateral TA_Pax7 029.nd2	715.68	373.66	342.02	342.02
8	C3_14d regen contral lateral TA_Pax7 028.nd2	984.46	380.67	603.79	603.79
9	C3_14d regen contral lateral TA_Pax7 028.nd2	1237.29	383.35	853.94	853.94
10	C3_14d regen contral lateral TA_Pax7 028.nd2	955.44	323.5	631.94	631.94
11	C3_14d regen contral lateral TA_Pax7 028.nd2	469.08	299.31	169.77	169.77
12	C3_14d regen contral lateral TA_Pax7 028.nd2	981.42	414.71	566.71	566.71
13	C3_14d regen contral lateral TA_Pax7 027.nd2	1358.55	430.01	928.54	928.54
14	C3_14d regen contral lateral TA_Pax7 025.nd2	1047.68	338.56	709.12	709.12
15	C3_14d regen contral lateral TA_Pax7 023.nd2	1155.73	367.68	788.05	788.05
16	C3_14d regen contral lateral TA_Pax7 023.nd2	1089.72	351.19	738.53	738.53
17	C3_14d regen contral lateral TA_Pax7 023.nd2	626.47	337.07	289.4	289.4
18	C3_14d regen contral lateral TA_Pax7 023.nd2	569.95	352.91	217.04	217.04
19	C3_14d regen contral lateral TA_Pax7 023.nd2	532.34	331.18	201.16	201.16
20	C3_14d regen contral lateral TA_Pax7 023.nd2	957.2	379.62	577.58	577.58
21	C3_14d regen contral lateral TA_Pax7 022.nd2	1368.46	452.52	915.94	915.94
22	C3_14d regen contral lateral TA_Pax7 022.nd2	1089.59	456.84	632.75	632.75
23	C3_14d regen contral lateral TA_Pax7 022.nd2	1318.4	424.64	893.76	893.76
24	C3_14d regen contral lateral TA_Pax7 021.nd2	1014.35	433.72	580.63	580.63
25	C3_14d regen contral lateral TA_Pax7 021.nd2	1109.45	365.43	744.02	744.02
26	C3_14d regen contral lateral TA_Pax7 021.nd2	800.39	334.57	465.82	465.82
27	C3_14d regen contral lateral TA_Pax7 019.nd2	1280.57	376.44	904.13	904.13
28	C3_14d regen contral lateral TA_Pax7 019.nd2	662.49	346.44	316.05	316.05
29	C3_14d regen contral lateral TA_Pax7 018.nd2	1020.17	388.23	631.94	631.94
30	C3_14d regen contral lateral TA_Pax7 018.nd2	912.47	334.73	577.74	577.74
31	C3_14d regen contral lateral TA_Pax7 017.nd2	1673.09	399.47	1273.62	1273.62
32	C3_14d regen contral lateral TA_Pax7 015.nd2	948.57	319.93	628.64	628.64
33	C3_14d regen contral lateral TA_Pax7 015.nd2	803.77	273.83	529.94	529.94
34	C3_14d regen contral lateral TA_Pax7 014.nd2	780.45	338.44	442.01	442.01
35	C3_14d regen contral lateral TA_Pax7 014.nd2	701.62	248.92	452.7	452.7
36	C3_14d regen contral lateral TA_Pax7 014.nd2	733.74	256.46	477.28	477.28
37	C3_14d regen contral lateral TA_Pax7 014.nd2	527.93	230.05	297.88	297.88
38	C3_14d regen contral lateral TA_Pax7 011.nd2	1138.19	384.3	753.89	753.89
39	C3_14d regen contral lateral TA_Pax7 011.nd2	986.53	344.8	641.73	641.73
40	C3_14d regen contral lateral TA_Pax7 011.nd2	612.57	274.83	337.74	337.74
41	C3_14d regen contral lateral TA_Pax7 011.nd2	1253.45	345.74	907.71	907.71
42	C3_14d regen contral lateral TA_Pax7 011.nd2	745.9	273.36	472.54	472.54
43	C3_14d regen contral lateral TA_Pax7 011.nd2	936.93	385.56	551.37	551.37
44	C3_14d regen contral lateral TA_Pax7 010.nd2	944.65	372.1	572.55	572.55
45	C3_14d regen contral lateral TA_Pax7 009.nd2	1524.66	565.8	958.86	958.86
46	C3_14d regen contral lateral TA_Pax7 009.nd2	1505.78	538.12	967.66	967.66
47	C3_14d regen contral lateral TA_Pax7 009.nd2	776.37	352.59	423.78	423.78
48	C3_14d regen contral lateral TA_Pax7 009.nd2	801.34	437.47	363.87	363.87
49	C3_14d regen contral lateral TA_Pax7 008.nd2	1291.32	370.77	920.55	920.55
50	C3_14d regen contral lateral TA_Pax7 007.nd2	905.85	340.87	564.98	564.98
51	C3_14d regen contral lateral TA_Pax7 007.nd2	1022	360.68	661.32	661.32
52	C3_14d regen contral lateral TA_Pax7 007.nd2	541.31	297.62	243.69	243.69
53	C3_14d regen contral lateral TA_Pax7 006.nd2	1254.84	397.1	857.74	857.74
54	C3_14d regen contral lateral TA_Pax7 006.nd2	1215.39	460.07	755.32	755.32
55	C3_14d regen contral lateral TA_Pax7 006.nd2	934.2	265.97	668.23	668.23
56	C3_14d regen contral lateral TA_Pax7 005.nd2	857.96	397.57	460.39	460.39
57	C3_14d regen contral lateral TA_Pax7 005.nd2	1219.99	386.99	833	833
58	C3_14d regen contral lateral TA_Pax7 005.nd2	843.21	479.03	364.18	364.18
59	C3_14d regen contral lateral TA_Pax7 005.nd2	740.48	417.45	323.03	323.03
60	C3_14d regen contral lateral TA_Pax7 005.nd2	920.17	432.98	487.19	487.19
61	C3_14d regen contral lateral TA_Pax7 005.nd2	1578.05	457.03	1121.02	1121.02
62	C3_14d regen contral lateral TA_Pax7 005.nd2	596.26	326.15	270.11	270.11
63	C3_14d regen contral lateral TA_Pax7 004.nd2	1152.55	352.65	799.9	799.9
64	C3_14d regen contral lateral TA_Pax7 004.nd2	1437.87	424.81	1013.06	1013.06
65	C3_14d regen contral lateral TA_Pax7 004.nd2	681.83	311.81	370.02	370.02
66	C3_14d regen contral lateral TA_Pax7 004.nd2	631.62	323.89	307.73	307.73
67	C3_14d regen contral lateral TA_Pax7 004.nd2	1258.5	395.67	862.83	862.83
68	C3_14d regen contral lateral TA_Pax7 003.nd2	1661.6	400.11	1261.49	1261.49
69	C3_14d regen contral lateral TA_Pax7 003.nd2	1317.91	436.31	881.6	881.6
70	C3_14d regen contral lateral TA_Pax7 003.nd2	1089.97	408.66	681.31	681.31
71	C3_14d regen contral lateral TA_Pax7 003.nd2	1047.99	389.81	658.18	658.18
72	C3_14d regen contral lateral TA_Pax7 003.nd2	717.22	279.75	437.47	437.47
73	C3_14d regen contral lateral TA_Pax7 003.nd2	836.47	297.85	538.62	538.62
74	C3_14d regen contral lateral TA_Pax7 003.nd2	1292.7	358.64	934.06	934.06
75	C3_14d regen contral lateral TA_Pax7 002.nd2	977.33	382.49	594.84	594.84
76	C3_14d regen contral lateral TA_Pax7 002.nd2	826.75	365.08	461.67	461.67
77	C3_14d regen contral lateral TA_Pax7 002.nd2	1090.49	317.02	773.47	773.47
78	C3_14d regen contral lateral TA_Pax7 002.nd2	783.7	309.09	474.61	474.61
79	C3_14d regen contral lateral TA_Pax7 002.nd2	1236.87	393.45	843.42	843.42
80	C3_14d regen contral lateral TA_Pax7 001.nd2	1659.85	494.76	1165.09	1165.09
81	C3_14d regen contral lateral TA_Pax7 001.nd2	642.99	358.83	284.16	284.16
82	C3_14d regen contral lateral TA_Pax7 040.nd2	849.76	474.06	375.7	375.7
83	C3_14d regen contral lateral TA_Pax7 040.nd2	1021.29	357.69	663.6	663.6
84	C3_14d regen contral lateral TA_Pax7 040.nd2	1047.21	458.74	588.47	588.47
85	C3_14d regen contral lateral TA_Pax7 040.nd2	971.74	312.88	658.86	658.86
86	C3_14d regen contral lateral TA_Pax7 039.nd2	531.56	284.39	247.17	247.17
87	C3_14d regen contral lateral TA_Pax7 039.nd2	1354.39	433.36	921.03	921.03
88	C3_14d regen contral lateral TA_Pax7 039.nd2	1145.45	433.38	712.07	712.07
89	C3_14d regen contral lateral TA_Pax7 038.nd2	1406.34	439.72	966.62	966.62
90	C3_14d regen contral lateral TA_Pax7 038.nd2	832.89	355.02	477.87	477.87
91	C3_14d regen contral lateral TA_Pax7 038.nd2	520.38	323.76	196.62	196.62
92	C3_14d regen contral lateral TA_Pax7 038.nd2	604.52	292.27	312.25	312.25
93	C3_14d regen contral lateral TA_Pax7 038.nd2	693.16	403.17	289.99	289.99
94	C3_14d regen contral lateral TA_Pax7 037.nd2	968.21	403.82	564.39	564.39
95	C3_14d regen contral lateral TA_Pax7 037.nd2	1977.82	518.48	1459.34	1459.34
96	C3_14d regen contral lateral TA_Pax7 037.nd2	1522.53	429.69	1092.84	1092.84
97	C3_14d regen contral lateral TA_Pax7 037.nd2	1333.4	437.29	896.11	896.11
98	C3_14d regen contral lateral TA_Pax7 036.nd2	1107.34	407.96	699.38	699.38
99	C3_14d regen contral lateral TA_Pax7 036.nd2	557.47	313.12	244.35	244.35
100	C3_14d regen contral lateral TA_Pax7 035.nd2	1240.63	468.97	771.66	771.66
101	C3_14d regen contral lateral TA_Pax7 035.nd2	853.69	433.22	420.47	420.47
102	C3_14d regen contral lateral TA_Pax7 035.nd2	1154.69	357.49	797.2	797.2
103	C3_14d regen contral lateral TA_Pax7 035.nd2	1191.83	383.67	808.16	808.16
104	C3_14d regen contral lateral TA_Pax7 035.nd2	606.61	337.14	269.47	269.47
105	C3_14d regen contral lateral TA_Pax7 035.nd2	922.76	370.67	552.09	552.09
106	C3_14d regen contral lateral TA_Pax7 034.nd2	1113.66	384.38	729.28	729.28
107	C3_14d regen contral lateral TA_Pax7 033.nd2	1575	479.07	1095.93	1095.93
108	C3_14d regen contral lateral TA_Pax7 033.nd2	661.45	347.76	313.69	313.69
109	C3_14d regen contral lateral TA_Pax7 033.nd2	1203.38	391.59	811.79	811.79
110	C3_14d regen contral lateral TA_Pax7 032.nd2	872.75	477.96	394.79	394.79
111	C3_14d regen contral lateral TA_Pax7 032.nd2	1086	375.53	710.47	710.47
112	C3_14d regen contral lateral TA_Pax7 032.nd2	984.61	302.44	682.17	682.17
113	C3_14d regen contral lateral TA_Pax7 031.nd2	1071.9	587.93	483.97	483.97
114	C3_14d regen contral lateral TA_Pax7 031.nd2	1165.35	543.89	621.46	621.46

## Sheet: Ctrl6_CL TA_Pax7
Item	Source	Pax7 (Cy5) Mean Intensity	Cy5 background	Pax7 intensity- background intensity	Corrected minus to zeros
1	C6_14d regen contral lateral TA_Pax7 030.nd2	1269.44	455.47	813.97	813.97
2	C6_14d regen contral lateral TA_Pax7 030.nd2	1177.68	609.8	567.88	567.88
3	C6_14d regen contral lateral TA_Pax7 030.nd2	1428.9	540.18	888.72	888.72
4	C6_14d regen contral lateral TA_Pax7 029.nd2	1120.51	513.95	606.56	606.56
5	C6_14d regen contral lateral TA_Pax7 029.nd2	1137.42	363.39	774.03	774.03
6	C6_14d regen contral lateral TA_Pax7 029.nd2	545.73	319.38	226.35	226.35
7	C6_14d regen contral lateral TA_Pax7 028.nd2	1196.31	437.56	758.75	758.75
8	C6_14d regen contral lateral TA_Pax7 028.nd2	1554.2	417.92	1136.28	1136.28
9	C6_14d regen contral lateral TA_Pax7 027.nd2	1426.91	411.93	1014.98	1014.98
10	C6_14d regen contral lateral TA_Pax7 027.nd2	974.73	410.02	564.71	564.71
11	C6_14d regen contral lateral TA_Pax7 027.nd2	1003.53	435.18	568.35	568.35
12	C6_14d regen contral lateral TA_Pax7 027.nd2	537.92	346.72	191.2	191.2
13	C6_14d regen contral lateral TA_Pax7 027.nd2	1416.4	388.9	1027.5	1027.5
14	C6_14d regen contral lateral TA_Pax7 026.nd2	1141.15	499.08	642.07	642.07
15	C6_14d regen contral lateral TA_Pax7 026.nd2	940.4	464.97	475.43	475.43
16	C6_14d regen contral lateral TA_Pax7 026.nd2	949.7	426.59	523.11	523.11
17	C6_14d regen contral lateral TA_Pax7 026.nd2	853.32	478.76	374.56	374.56
18	C6_14d regen contral lateral TA_Pax7 026.nd2	1428.87	596.87	832	832
19	C6_14d regen contral lateral TA_Pax7 026.nd2	1239.17	551.57	687.6	687.6
20	C6_14d regen contral lateral TA_Pax7 026.nd2	876.39	403.74	472.65	472.65
21	C6_14d regen contral lateral TA_Pax7 025.nd2	1198.28	520.66	677.62	677.62
22	C6_14d regen contral lateral TA_Pax7 025.nd2	1353.11	566.67	786.44	786.44
23	C6_14d regen contral lateral TA_Pax7 025.nd2	1431.95	536.75	895.2	895.2
24	C6_14d regen contral lateral TA_Pax7 025.nd2	878.98	434.53	444.45	444.45
25	C6_14d regen contral lateral TA_Pax7 025.nd2	1046.58	367.23	679.35	679.35
26	C6_14d regen contral lateral TA_Pax7 025.nd2	924.59	415.78	508.81	508.81
27	C6_14d regen contral lateral TA_Pax7 024.nd2	894.85	316.47	578.38	578.38
28	C6_14d regen contral lateral TA_Pax7 024.nd2	1128.16	355.45	772.71	772.71
29	C6_14d regen contral lateral TA_Pax7 024.nd2	725.89	337.58	388.31	388.31
30	C6_14d regen contral lateral TA_Pax7 024.nd2	441.23	322.79	118.44	118.44
31	C6_14d regen contral lateral TA_Pax7 023.nd2	1077.93	519.2	558.73	558.73
32	C6_14d regen contral lateral TA_Pax7 023.nd2	1556.44	456.2	1100.24	1100.24
33	C6_14d regen contral lateral TA_Pax7 023.nd2	603.1	399.81	203.29	203.29
34	C6_14d regen contral lateral TA_Pax7 023.nd2	712.03	376.26	335.77	335.77
35	C6_14d regen contral lateral TA_Pax7 023.nd2	634.77	382.92	251.85	251.85
36	C6_14d regen contral lateral TA_Pax7 023.nd2	842.67	371.67	471	471
37	C6_14d regen contral lateral TA_Pax7 022.nd2	541.5	298.57	242.93	242.93
38	C6_14d regen contral lateral TA_Pax7 022.nd2	1280.87	466.23	814.64	814.64
39	C6_14d regen contral lateral TA_Pax7 022.nd2	1019.52	349.21	670.31	670.31
40	C6_14d regen contral lateral TA_Pax7 022.nd2	585.37	254.55	330.82	330.82
41	C6_14d regen contral lateral TA_Pax7 022.nd2	578.32	249.75	328.57	328.57
42	C6_14d regen contral lateral TA_Pax7 022.nd2	1012.81	334.96	677.85	677.85
43	C6_14d regen contral lateral TA_Pax7 021.nd2	926.73	361.41	565.32	565.32
44	C6_14d regen contral lateral TA_Pax7 021.nd2	918.87	271.2	647.67	647.67
45	C6_14d regen contral lateral TA_Pax7 021.nd2	600.3	298.2	302.1	302.1
46	C6_14d regen contral lateral TA_Pax7 021.nd2	754.2	259.32	494.88	494.88
47	C6_14d regen contral lateral TA_Pax7 020.nd2	1390.27	509.57	880.7	880.7
48	C6_14d regen contral lateral TA_Pax7 020.nd2	919.34	449.87	469.47	469.47
49	C6_14d regen contral lateral TA_Pax7 020.nd2	1008.97	346.69	662.28	662.28
50	C6_14d regen contral lateral TA_Pax7 020.nd2	574.63	324.15	250.48	250.48
51	C6_14d regen contral lateral TA_Pax7 019.nd2	369.98	303.83	66.15	66.15
52	C6_14d regen contral lateral TA_Pax7 019.nd2	1342.28	443.38	898.9	898.9
53	C6_14d regen contral lateral TA_Pax7 019.nd2	786.22	521.96	264.26	264.26
54	C6_14d regen contral lateral TA_Pax7 019.nd2	525.16	346.46	178.7	178.7
55	C6_14d regen contral lateral TA_Pax7 018.nd2	1454.19	479.12	975.07	975.07
56	C6_14d regen contral lateral TA_Pax7 018.nd2	535.2	301.76	233.44	233.44
57	C6_14d regen contral lateral TA_Pax7 018.nd2	1312.45	414.32	898.13	898.13
58	C6_14d regen contral lateral TA_Pax7 017.nd2	974.48	380.51	593.97	593.97
59	C6_14d regen contral lateral TA_Pax7 017.nd2	539.21	280.45	258.76	258.76
60	C6_14d regen contral lateral TA_Pax7 017.nd2	886.33	318.65	567.68	567.68
61	C6_14d regen contral lateral TA_Pax7 017.nd2	1900.69	514.19	1386.5	1386.5
62	C6_14d regen contral lateral TA_Pax7 017.nd2	1400.32	495.17	905.15	905.15
63	C6_14d regen contral lateral TA_Pax7 017.nd2	589.85	311.13	278.72	278.72
64	C6_14d regen contral lateral TA_Pax7 016.nd2	1389.69	463.52	926.17	926.17
65	C6_14d regen contral lateral TA_Pax7 016.nd2	1273.24	547.32	725.92	725.92
66	C6_14d regen contral lateral TA_Pax7 016.nd2	1272.64	509.11	763.53	763.53
67	C6_14d regen contral lateral TA_Pax7 016.nd2	1079.09	489.82	589.27	589.27
68	C6_14d regen contral lateral TA_Pax7 015.nd2	1339.09	481.24	857.85	857.85
69	C6_14d regen contral lateral TA_Pax7 015.nd2	703.91	417.92	285.99	285.99
70	C6_14d regen contral lateral TA_Pax7 015.nd2	936.09	324.72	611.37	611.37
71	C6_14d regen contral lateral TA_Pax7 014.nd2	1200.04	339.36	860.68	860.68
72	C6_14d regen contral lateral TA_Pax7 014.nd2	1031.95	369.43	662.52	662.52
73	C6_14d regen contral lateral TA_Pax7 014.nd2	1220.29	412.49	807.8	807.8
74	C6_14d regen contral lateral TA_Pax7 014.nd2	747.06	263.12	483.94	483.94
75	C6_14d regen contral lateral TA_Pax7 013.nd2	717.33	288.57	428.76	428.76
76	C6_14d regen contral lateral TA_Pax7 013.nd2	1118.99	362.84	756.15	756.15
77	C6_14d regen contral lateral TA_Pax7 013.nd2	962.69	406.98	555.71	555.71
78	C6_14d regen contral lateral TA_Pax7 012.nd2	428.44	254.43	174.01	174.01
79	C6_14d regen contral lateral TA_Pax7 012.nd2	621.94	306.81	315.13	315.13
80	C6_14d regen contral lateral TA_Pax7 012.nd2	837.22	265.76	571.46	571.46
81	C6_14d regen contral lateral TA_Pax7 011.nd2	1230.84	477.11	753.73	753.73
82	C6_14d regen contral lateral TA_Pax7 011.nd2	604.08	351.23	252.85	252.85
83	C6_14d regen contral lateral TA_Pax7 011.nd2	552.39	445.41	106.98	106.98
84	C6_14d regen contral lateral TA_Pax7 010.nd2	1071.21	376.04	695.17	695.17
85	C6_14d regen contral lateral TA_Pax7 009.nd2	692.42	350.32	342.1	342.1
86	C6_14d regen contral lateral TA_Pax7 009.nd2	1017.25	385.92	631.33	631.33
87	C6_14d regen contral lateral TA_Pax7 009.nd2	761.71	358.11	403.6	403.6
88	C6_14d regen contral lateral TA_Pax7 009.nd2	812.6	319.06	493.54	493.54
89	C6_14d regen contral lateral TA_Pax7 008.nd2	1156.84	385.1	771.74	771.74
90	C6_14d regen contral lateral TA_Pax7 008.nd2	969.49	332.81	636.68	636.68
91	C6_14d regen contral lateral TA_Pax7 008.nd2	764.79	401.17	363.62	363.62
92	C6_14d regen contral lateral TA_Pax7 007.nd2	1046.96	364.12	682.84	682.84
93	C6_14d regen contral lateral TA_Pax7 007.nd2	702.33	350.81	351.52	351.52
94	C6_14d regen contral lateral TA_Pax7 007.nd2	1101.29	460.94	640.35	640.35
95	C6_14d regen contral lateral TA_Pax7 007.nd2	542.67	375.68	166.99	166.99
96	C6_14d regen contral lateral TA_Pax7 006.nd2	928.08	412.03	516.05	516.05
97	C6_14d regen contral lateral TA_Pax7 006.nd2	682.81	281	401.81	401.81
98	C6_14d regen contral lateral TA_Pax7 006.nd2	902.33	341.91	560.42	560.42
99	C6_14d regen contral lateral TA_Pax7 006.nd2	513.66	292.88	220.78	220.78
100	C6_14d regen contral lateral TA_Pax7 005.nd2	993.79	381.57	612.22	612.22
101	C6_14d regen contral lateral TA_Pax7 004.nd2	824.42	414.45	409.97	409.97
102	C6_14d regen contral lateral TA_Pax7 004.nd2	815.41	387.89	427.52	427.52
103	C6_14d regen contral lateral TA_Pax7 003.nd2	840.95	371.18	469.77	469.77
104	C6_14d regen contral lateral TA_Pax7 003.nd2	639.79	400.77	239.02	239.02
105	C6_14d regen contral lateral TA_Pax7 003.nd2	848.25	403.78	444.47	444.47
106	C6_14d regen contral lateral TA_Pax7 003.nd2	558.27	356.12	202.15	202.15
107	C6_14d regen contral lateral TA_Pax7 003.nd2	714.76	424.42	290.34	290.34
108	C6_14d regen contral lateral TA_Pax7 002.nd2	1002.95	348.85	654.1	654.1
109	C6_14d regen contral lateral TA_Pax7 002.nd2	394.16	281.69	112.47	112.47
110	C6_14d regen contral lateral TA_Pax7 002.nd2	596.79	282.96	313.83	313.83
111	C6_14d regen contral lateral TA_Pax7 001.nd2	575.45	346.27	229.18	229.18
112	C6_14d regen contral lateral TA_Pax7 001.nd2	980.75	314.18	666.57	666.57
113	C6_14d regen contral lateral TA_Pax7 001.nd2	842.46	356.96	485.5	485.5
114	C6_14d regen contral lateral TA_Pax7 001.nd2	886.66	336.28	550.38	550.38

## Sheet: Expt2_CL TA_Pax7
Item	Source	Pax7 (Cy5) Mean Intensity	Cy5 background	Pax7 intensity- background intensity	Corrected minus to zeros
1	E2_14d regen contral lateral TA_Pax7 030.nd2	471.49	299.91	171.58	171.58
2	E2_14d regen contral lateral TA_Pax7 030.nd2	486.15	250.74	235.41	235.41
3	E2_14d regen contral lateral TA_Pax7 030.nd2	422.31	274.2	148.11	148.11
4	E2_14d regen contral lateral TA_Pax7 030.nd2	471.58	262.92	208.66	208.66
5	E2_14d regen contral lateral TA_Pax7 029.nd2	562.01	358.61	203.4	203.4
6	E2_14d regen contral lateral TA_Pax7 029.nd2	582.18	279.21	302.97	302.97
7	E2_14d regen contral lateral TA_Pax7 028.nd2	657.76	392.73	265.03	265.03
8	E2_14d regen contral lateral TA_Pax7 028.nd2	684.18	324.35	359.83	359.83
9	E2_14d regen contral lateral TA_Pax7 027.nd2	525.13	380.01	145.12	145.12
10	E2_14d regen contral lateral TA_Pax7 027.nd2	673.91	423.22	250.69	250.69
11	E2_14d regen contral lateral TA_Pax7 027.nd2	467.93	305.54	162.39	162.39
12	E2_14d regen contral lateral TA_Pax7 026.nd2	409.13	267.75	141.38	141.38
13	E2_14d regen contral lateral TA_Pax7 026.nd2	336.43	239.2	97.23	97.23
14	E2_14d regen contral lateral TA_Pax7 025.nd2	559.08	227.31	331.77	331.77
15	E2_14d regen contral lateral TA_Pax7 025.nd2	403.18	229.14	174.04	174.04
16	E2_14d regen contral lateral TA_Pax7 024.nd2	429.86	307.16	122.7	122.7
17	E2_14d regen contral lateral TA_Pax7 024.nd2	556.43	299.49	256.94	256.94
18	E2_14d regen contral lateral TA_Pax7 024.nd2	517.54	234.84	282.7	282.7
19	E2_14d regen contral lateral TA_Pax7 024.nd2	286.26	208.87	77.39	77.39
20	E2_14d regen contral lateral TA_Pax7 023.nd2	873.69	318.64	555.05	555.05
21	E2_14d regen contral lateral TA_Pax7 023.nd2	621.6	402.83	218.77	218.77
22	E2_14d regen contral lateral TA_Pax7 023.nd2	893.38	424.49	468.89	468.89
23	E2_14d regen contral lateral TA_Pax7 022.nd2	733.79	398.31	335.48	335.48
24	E2_14d regen contral lateral TA_Pax7 021.nd2	681.66	320.42	361.24	361.24
25	E2_14d regen contral lateral TA_Pax7 021.nd2	558.99	270.62	288.37	288.37
26	E2_14d regen contral lateral TA_Pax7 021.nd2	415.63	254.93	160.7	160.7
27	E2_14d regen contral lateral TA_Pax7 020.nd2	830.64	428.74	401.9	401.9
28	E2_14d regen contral lateral TA_Pax7 020.nd2	601.63	375.59	226.04	226.04
29	E2_14d regen contral lateral TA_Pax7 019.nd2	449.17	245.58	203.59	203.59
30	E2_14d regen contral lateral TA_Pax7 019.nd2	523.34	309.49	213.85	213.85
31	E2_14d regen contral lateral TA_Pax7 019.nd2	385.97	219.53	166.44	166.44
32	E2_14d regen contral lateral TA_Pax7 019.nd2	451.22	253.47	197.75	197.75
33	E2_14d regen contral lateral TA_Pax7 018.nd2	339.77	251.99	87.78	87.78
34	E2_14d regen contral lateral TA_Pax7 018.nd2	685.41	267.98	417.43	417.43
35	E2_14d regen contral lateral TA_Pax7 018.nd2	481.36	276.27	205.09	205.09
36	E2_14d regen contral lateral TA_Pax7 018.nd2	563.4	314.6	248.8	248.8
37	E2_14d regen contral lateral TA_Pax7 018.nd2	341.39	267.84	73.55	73.55
38	E2_14d regen contral lateral TA_Pax7 018.nd2	401.24	228.61	172.63	172.63
39	E2_14d regen contral lateral TA_Pax7 018.nd2	505.38	313.24	192.14	192.14
40	E2_14d regen contral lateral TA_Pax7 017.nd2	510.61	297.57	213.04	213.04
41	E2_14d regen contral lateral TA_Pax7 017.nd2	326.58	239.31	87.27	87.27
42	E2_14d regen contral lateral TA_Pax7 017.nd2	415.7	244.52	171.18	171.18
43	E2_14d regen contral lateral TA_Pax7 016.nd2	446.81	217.84	228.97	228.97
44	E2_14d regen contral lateral TA_Pax7 016.nd2	383.02	239.23	143.79	143.79
45	E2_14d regen contral lateral TA_Pax7 015.nd2	445.29	227.27	218.02	218.02
46	E2_14d regen contral lateral TA_Pax7 015.nd2	230.12	194.71	35.41	35.41
47	E2_14d regen contral lateral TA_Pax7 015.nd2	252.84	199.31	53.53	53.53
48	E2_14d regen contral lateral TA_Pax7 014.nd2	418.92	294.76	124.16	124.16
49	E2_14d regen contral lateral TA_Pax7 014.nd2	393.71	281.39	112.32	112.32
50	E2_14d regen contral lateral TA_Pax7 013.nd2	773.97	386.43	387.54	387.54
51	E2_14d regen contral lateral TA_Pax7 012.nd2	704.39	376.92	327.47	327.47
52	E2_14d regen contral lateral TA_Pax7 012.nd2	449.61	258.36	191.25	191.25
53	E2_14d regen contral lateral TA_Pax7 012.nd2	403.29	212.29	191	191
54	E2_14d regen contral lateral TA_Pax7 011.nd2	679	298.13	380.87	380.87
55	E2_14d regen contral lateral TA_Pax7 010.nd2	457.56	222.66	234.9	234.9
56	E2_14d regen contral lateral TA_Pax7 010.nd2	462.44	217.35	245.09	245.09
57	E2_14d regen contral lateral TA_Pax7 008.nd2	536.72	337.39	199.33	199.33
58	E2_14d regen contral lateral TA_Pax7 008.nd2	442.29	265.6	176.69	176.69
59	E2_14d regen contral lateral TA_Pax7 008.nd2	356.88	282.53	74.35	74.35
60	E2_14d regen contral lateral TA_Pax7 007.nd2	915.81	454.17	461.64	461.64
61	E2_14d regen contral lateral TA_Pax7 006.nd2	503.38	283.87	219.51	219.51
62	E2_14d regen contral lateral TA_Pax7 006.nd2	508.36	271.15	237.21	237.21
63	E2_14d regen contral lateral TA_Pax7 005.nd2	768.23	341.82	426.41	426.41
64	E2_14d regen contral lateral TA_Pax7 005.nd2	487.12	316.44	170.68	170.68
65	E2_14d regen contral lateral TA_Pax7 005.nd2	540.68	288.23	252.45	252.45
66	E2_14d regen contral lateral TA_Pax7 005.nd2	567.39	317.42	249.97	249.97
67	E2_14d regen contral lateral TA_Pax7 004.nd2	398.34	238.28	160.06	160.06
68	E2_14d regen contral lateral TA_Pax7 004.nd2	410.19	279.05	131.14	131.14
69	E2_14d regen contral lateral TA_Pax7 004.nd2	279.58	195.48	84.1	84.1
70	E2_14d regen contral lateral TA_Pax7 004.nd2	310.15	182.58	127.57	127.57
71	E2_14d regen contral lateral TA_Pax7 003.nd2	403.48	240.51	162.97	162.97
72	E2_14d regen contral lateral TA_Pax7 003.nd2	547.27	221.16	326.11	326.11
73	E2_14d regen contral lateral TA_Pax7 003.nd2	305.77	204.24	101.53	101.53
74	E2_14d regen contral lateral TA_Pax7 003.nd2	359.08	232.45	126.63	126.63
75	E2_14d regen contral lateral TA_Pax7 003.nd2	285.4	206.27	79.13	79.13
76	E2_14d regen contral lateral TA_Pax7 003.nd2	284.97	200.72	84.25	84.25
77	E2_14d regen contral lateral TA_Pax7 002.nd2	482.5	261.35	221.15	221.15
78	E2_14d regen contral lateral TA_Pax7 002.nd2	365.82	235.39	130.43	130.43
79	E2_14d regen contral lateral TA_Pax7 002.nd2	468.93	222.97	245.96	245.96
80	E2_14d regen contral lateral TA_Pax7 002.nd2	235.22	193.3	41.92	41.92
81	E2_14d regen contral lateral TA_Pax7 002.nd2	577.02	301.13	275.89	275.89
82	C6_14d regen contral lateral TA_Pax7 001.nd2	553.52	249.32	304.2	304.2
83	C6_14d regen contral lateral TA_Pax7 001.nd2	407.46	261.12	146.34	146.34
84	C6_14d regen contral lateral TA_Pax7 001.nd2	476.88	281.06	195.82	195.82
85	E2_14d regen contral lateral TA_Pax7 040.nd2	525.19	252.25	272.94	272.94
86	E2_14d regen contral lateral TA_Pax7 040.nd2	698.47	284.57	413.9	413.9
87	E2_14d regen contral lateral TA_Pax7 040.nd2	571.28	267.24	304.04	304.04
88	E2_14d regen contral lateral TA_Pax7 040.nd2	410.42	272.07	138.35	138.35
89	E2_14d regen contral lateral TA_Pax7 039.nd2	347.72	238.41	109.31	109.31
90	E2_14d regen contral lateral TA_Pax7 039.nd2	320.91	190.71	130.2	130.2
91	E2_14d regen contral lateral TA_Pax7 039.nd2	266.76	198.17	68.59	68.59
92	E2_14d regen contral lateral TA_Pax7 039.nd2	495.29	227.35	267.94	267.94
93	E2_14d regen contral lateral TA_Pax7 038.nd2	450.18	272.21	177.97	177.97
94	E2_14d regen contral lateral TA_Pax7 038.nd2	409.16	222.5	186.66	186.66
95	E2_14d regen contral lateral TA_Pax7 038.nd2	637.5	289.44	348.06	348.06
96	E2_14d regen contral lateral TA_Pax7 038.nd2	409	246.78	162.22	162.22
97	E2_14d regen contral lateral TA_Pax7 038.nd2	590.74	298.09	292.65	292.65
98	E2_14d regen contral lateral TA_Pax7 037.nd2	536.72	286.05	250.67	250.67
99	E2_14d regen contral lateral TA_Pax7 037.nd2	406.77	239.75	167.02	167.02
100	E2_14d regen contral lateral TA_Pax7 036.nd2	615.42	298.86	316.56	316.56
101	E2_14d regen contral lateral TA_Pax7 036.nd2	381.39	251.53	129.86	129.86
102	E2_14d regen contral lateral TA_Pax7 036.nd2	322.85	209.32	113.53	113.53
103	E2_14d regen contral lateral TA_Pax7 035.nd2	396.19	232.38	163.81	163.81
104	E2_14d regen contral lateral TA_Pax7 035.nd2	389.84	245.58	144.26	144.26
105	E2_14d regen contral lateral TA_Pax7 035.nd2	552.38	267.95	284.43	284.43
106	E2_14d regen contral lateral TA_Pax7 035.nd2	494.82	236.24	258.58	258.58
107	E2_14d regen contral lateral TA_Pax7 034.nd2	503.58	289.12	214.46	214.46
108	E2_14d regen contral lateral TA_Pax7 034.nd2	474.46	235.67	238.79	238.79
109	E2_14d regen contral lateral TA_Pax7 034.nd2	510.61	264	246.61	246.61

## Sheet: Expt7_CL TA_Pax7
Item	Source	Pax7 (Cy5) Mean Intensity	Cy5 background	Pax7 intensity- background intensity	Corrected minus to zeros
1	E7_14d regen contral lateral TA_Pax7 030.nd2	955.7	428.94	526.76	526.76
2	E7_14d regen contral lateral TA_Pax7 030.nd2	629.49	377.74	251.75	251.75
3	E7_14d regen contral lateral TA_Pax7 030.nd2	877.1	410.99	466.11	466.11
4	E7_14d regen contral lateral TA_Pax7 030.nd2	461.6	276.31	185.29	185.29
5	E7_14d regen contral lateral TA_Pax7 029.nd2	678.88	290.87	388.01	388.01
6	E7_14d regen contral lateral TA_Pax7 029.nd2	503.8	295.3	208.5	208.5
7	E7_14d regen contral lateral TA_Pax7 029.nd2	694.33	394.92	299.41	299.41
8	E7_14d regen contral lateral TA_Pax7 029.nd2	552.64	323.02	229.62	229.62
9	E7_14d regen contral lateral TA_Pax7 029.nd2	781.64	411.5	370.14	370.14
10	E7_14d regen contral lateral TA_Pax7 028.nd2	813.56	356.92	456.64	456.64
11	E7_14d regen contral lateral TA_Pax7 028.nd2	928.55	433.02	495.53	495.53
12	E7_14d regen contral lateral TA_Pax7 028.nd2	460.09	299.22	160.87	160.87
13	E7_14d regen contral lateral TA_Pax7 028.nd2	840.31	314.8	525.51	525.51
14	E7_14d regen contral lateral TA_Pax7 027.nd2	675.48	378.99	296.49	296.49
15	E7_14d regen contral lateral TA_Pax7 027.nd2	925.27	394.06	531.21	531.21
16	E7_14d regen contral lateral TA_Pax7 027.nd2	822	350.54	471.46	471.46
17	E7_14d regen contral lateral TA_Pax7 027.nd2	647.21	401.47	245.74	245.74
18	E7_14d regen contral lateral TA_Pax7 026.nd2	961.55	455.64	505.91	505.91
19	E7_14d regen contral lateral TA_Pax7 026.nd2	710.03	407.24	302.79	302.79
20	E7_14d regen contral lateral TA_Pax7 026.nd2	384.26	268.92	115.34	115.34
21	E7_14d regen contral lateral TA_Pax7 026.nd2	620.92	337.23	283.69	283.69
22	E7_14d regen contral lateral TA_Pax7 026.nd2	710.25	430.87	279.38	279.38
23	E7_14d regen contral lateral TA_Pax7 026.nd2	696.25	384.63	311.62	311.62
24	E7_14d regen contral lateral TA_Pax7 026.nd2	785.69	366.74	418.95	418.95
25	E7_14d regen contral lateral TA_Pax7 025.nd2	876.5	394.16	482.34	482.34
26	E7_14d regen contral lateral TA_Pax7 024.nd2	793.24	451.15	342.09	342.09
27	E7_14d regen contral lateral TA_Pax7 024.nd2	875.3	448.82	426.48	426.48
28	E7_14d regen contral lateral TA_Pax7 024.nd2	551.56	344.25	207.31	207.31
29	E7_14d regen contral lateral TA_Pax7 024.nd2	556.94	285.08	271.86	271.86
30	E7_14d regen contral lateral TA_Pax7 023.nd2	388.02	242.7	145.32	145.32
31	E7_14d regen contral lateral TA_Pax7 023.nd2	710.09	318.84	391.25	391.25
32	E7_14d regen contral lateral TA_Pax7 023.nd2	471.52	222.87	248.65	248.65
33	E7_14d regen contral lateral TA_Pax7 023.nd2	942.79	340.78	602.01	602.01
34	E7_14d regen contral lateral TA_Pax7 023.nd2	530.11	298.68	231.43	231.43
35	E7_14d regen contral lateral TA_Pax7 023.nd2	1216.7	383.79	832.91	832.91
36	E7_14d regen contral lateral TA_Pax7 022.nd2	360.15	238.61	121.54	121.54
37	E7_14d regen contral lateral TA_Pax7 022.nd2	538.55	316.17	222.38	222.38
38	E7_14d regen contral lateral TA_Pax7 022.nd2	284.6	212.56	72.04	72.04
39	E7_14d regen contral lateral TA_Pax7 021.nd2	466.91	258	208.91	208.91
40	E7_14d regen contral lateral TA_Pax7 021.nd2	512.73	250.14	262.59	262.59
41	E7_14d regen contral lateral TA_Pax7 021.nd2	551.59	276.49	275.1	275.1
42	E7_14d regen contral lateral TA_Pax7 020.nd2	1203.93	366.93	837	837
43	E7_14d regen contral lateral TA_Pax7 020.nd2	735.48	429.42	306.06	306.06
44	E7_14d regen contral lateral TA_Pax7 019.nd2	503.15	295.39	207.76	207.76
45	E7_14d regen contral lateral TA_Pax7 019.nd2	777.92	388.58	389.34	389.34
46	E7_14d regen contral lateral TA_Pax7 019.nd2	753.15	376.72	376.43	376.43
47	E7_14d regen contral lateral TA_Pax7 019.nd2	581.81	289.48	292.33	292.33
48	E7_14d regen contral lateral TA_Pax7 018.nd2	725.48	351.06	374.42	374.42
49	E7_14d regen contral lateral TA_Pax7 018.nd2	914.46	501.78	412.68	412.68
50	E7_14d regen contral lateral TA_Pax7 018.nd2	513.29	248.15	265.14	265.14
51	E7_14d regen contral lateral TA_Pax7 017.nd2	498.48	377.94	120.54	120.54
52	E7_14d regen contral lateral TA_Pax7 017.nd2	419.7	265.69	154.01	154.01
53	E7_14d regen contral lateral TA_Pax7 017.nd2	837.93	334.11	503.82	503.82
54	E7_14d regen contral lateral TA_Pax7 017.nd2	583.44	234.83	348.61	348.61
55	E7_14d regen contral lateral TA_Pax7 016.nd2	535.14	322.2	212.94	212.94
56	E7_14d regen contral lateral TA_Pax7 016.nd2	848.2	487.14	361.06	361.06
57	E7_14d regen contral lateral TA_Pax7 016.nd2	804.59	404.16	400.43	400.43
58	E7_14d regen contral lateral TA_Pax7 015.nd2	574.8	319.34	255.46	255.46
59	E7_14d regen contral lateral TA_Pax7 015.nd2	744.28	341.16	403.12	403.12
60	E7_14d regen contral lateral TA_Pax7 015.nd2	1016.28	375.13	641.15	641.15
61	E7_14d regen contral lateral TA_Pax7 015.nd2	612.65	348.57	264.08	264.08
62	E7_14d regen contral lateral TA_Pax7 014.nd2	997.99	360.73	637.26	637.26
63	E7_14d regen contral lateral TA_Pax7 014.nd2	884.16	353.71	530.45	530.45
64	E7_14d regen contral lateral TA_Pax7 014.nd2	583.89	317.58	266.31	266.31
65	E7_14d regen contral lateral TA_Pax7 013.nd2	1079.51	487.51	592	592
66	E7_14d regen contral lateral TA_Pax7 013.nd2	752.38	430.55	321.83	321.83
67	E7_14d regen contral lateral TA_Pax7 013.nd2	989.57	382.79	606.78	606.78
68	E7_14d regen contral lateral TA_Pax7 013.nd2	527.17	329.46	197.71	197.71
69	E7_14d regen contral lateral TA_Pax7 013.nd2	752.32	325.61	426.71	426.71
70	E7_14d regen contral lateral TA_Pax7 012.nd2	740.33	384.17	356.16	356.16
71	E7_14d regen contral lateral TA_Pax7 012.nd2	628.49	364.96	263.53	263.53
72	E7_14d regen contral lateral TA_Pax7 012.nd2	837.97	364.75	473.22	473.22
73	E7_14d regen contral lateral TA_Pax7 012.nd2	801.41	380.53	420.88	420.88
74	E7_14d regen contral lateral TA_Pax7 011.nd2	906.13	444.65	461.48	461.48
75	E7_14d regen contral lateral TA_Pax7 011.nd2	866.63	429.64	436.99	436.99
76	E7_14d regen contral lateral TA_Pax7 011.nd2	961.29	369.52	591.77	591.77
77	E7_14d regen contral lateral TA_Pax7 011.nd2	852.64	360.33	492.31	492.31
78	E7_14d regen contral lateral TA_Pax7 011.nd2	866.1	344.87	521.23	521.23
79	E7_14d regen contral lateral TA_Pax7 011.nd2	824.9	317.49	507.41	507.41
80	E7_14d regen contral lateral TA_Pax7 011.nd2	853.11	353.37	499.74	499.74
81	E7_14d regen contral lateral TA_Pax7 010.nd2	830	428.97	401.03	401.03
82	E7_14d regen contral lateral TA_Pax7 010.nd2	826.8	412.79	414.01	414.01
83	E7_14d regen contral lateral TA_Pax7 010.nd2	1098.66	443.7	654.96	654.96
84	E7_14d regen contral lateral TA_Pax7 010.nd2	1020.31	505.41	514.9	514.9
85	E7_14d regen contral lateral TA_Pax7 010.nd2	854.76	450.05	404.71	404.71
86	E7_14d regen contral lateral TA_Pax7 009.nd2	1229.95	593.73	636.22	636.22
87	E7_14d regen contral lateral TA_Pax7 009.nd2	702.1	439.71	262.39	262.39
88	E7_14d regen contral lateral TA_Pax7 009.nd2	902.54	378.44	524.1	524.1
89	E7_14d regen contral lateral TA_Pax7 009.nd2	678.51	487.21	191.3	191.3
90	E7_14d regen contral lateral TA_Pax7 009.nd2	1129.98	487.7	642.28	642.28
91	E7_14d regen contral lateral TA_Pax7 008.nd2	842.11	450.05	392.06	392.06
92	E7_14d regen contral lateral TA_Pax7 008.nd2	889.1	649.98	239.12	239.12
93	E7_14d regen contral lateral TA_Pax7 008.nd2	703.65	367.27	336.38	336.38
94	E7_14d regen contral lateral TA_Pax7 007.nd2	534.97	348.66	186.31	186.31
95	E7_14d regen contral lateral TA_Pax7 007.nd2	963.36	465.37	497.99	497.99
96	E7_14d regen contral lateral TA_Pax7 007.nd2	473.54	333.81	139.73	139.73
97	E7_14d regen contral lateral TA_Pax7 006.nd2	375.23	266.56	108.67	108.67
98	E7_14d regen contral lateral TA_Pax7 006.nd2	544.42	357.79	186.63	186.63
99	E7_14d regen contral lateral TA_Pax7 005.nd2	638.47	367.11	271.36	271.36
100	E7_14d regen contral lateral TA_Pax7 005.nd2	673.33	367.83	305.5	305.5
101	E7_14d regen contral lateral TA_Pax7 005.nd2	830.37	414.57	415.8	415.8
102	E7_14d regen contral lateral TA_Pax7 004.nd2	825.27	405.7	419.57	419.57
103	E7_14d regen contral lateral TA_Pax7 004.nd2	506.89	337.06	169.83	169.83
104	E7_14d regen contral lateral TA_Pax7 003.nd2	1117.3	457.31	659.99	659.99
105	E7_14d regen contral lateral TA_Pax7 002.nd2	807.64	370.3	437.34	437.34
106	E7_14d regen contral lateral TA_Pax7 002.nd2	987.02	370.23	616.79	616.79
107	E7_14d regen contral lateral TA_Pax7 002.nd2	939.22	428.03	511.19	511.19
108	E7_14d regen contral lateral TA_Pax7 002.nd2	660.45	417.22	243.23	243.23
109	E7_14d regen contral lateral TA_Pax7 002.nd2	753.6	334.64	418.96	418.96
110	E7_14d regen contral lateral TA_Pax7 002.nd2	897.17	360.35	536.82	536.82
111	E7_14d regen contral lateral TA_Pax7 001.nd2	1035.55	425.95	609.6	609.6
112	E7_14d regen contral lateral TA_Pax7 001.nd2	749.58	314.22	435.36	435.36
113	E7_14d regen contral lateral TA_Pax7 001.nd2	463.5	318.24	145.26	145.26
114	E7_14d regen contral lateral TA_Pax7 001.nd2	463.9	306.57	157.33	157.33
115	E7_14d regen contral lateral TA_Pax7 001.nd2	593.94	295.48	298.46	298.46
116	E7_14d regen contral lateral TA_Pax7 001.nd2	514.5	397.9	116.6	116.6

## Sheet: Expt8_CL TA_Pax7
Item	Source	Pax7 (Cy5) Mean Intensity	Cy5 background	Pax7 intensity- background intensity	Corrected minus to zeros
1	E8_14d regen contral lateral_Pax7 030.nd2	519.19	215.33	303.86	303.86
2	E8_14d regen contral lateral_Pax7 030.nd2	701.81	296.19	405.62	405.62
3	E8_14d regen contral lateral_Pax7 029.nd2	663.08	460.55	202.53	202.53
4	E8_14d regen contral lateral_Pax7 029.nd2	328.54	214.11	114.43	114.43
5	E8_14d regen contral lateral_Pax7 028.nd2	442.48	287.26	155.22	155.22
6	E8_14d regen contral lateral_Pax7 028.nd2	476.97	206.28	270.69	270.69
7	E8_14d regen contral lateral_Pax7 028.nd2	668.79	287.54	381.25	381.25
8	E8_14d regen contral lateral_Pax7 027.nd2	614.51	332.96	281.55	281.55
9	E8_14d regen contral lateral_Pax7 027.nd2	671.2	386.79	284.41	284.41
10	E8_14d regen contral lateral_Pax7 026.nd2	587.81	231.95	355.86	355.86
11	E8_14d regen contral lateral_Pax7 026.nd2	664.9	380.09	284.81	284.81
12	E8_14d regen contral lateral_Pax7 026.nd2	625.68	330.9	294.78	294.78
13	E8_14d regen contral lateral_Pax7 025.nd2	513.76	293.93	219.83	219.83
14	E8_14d regen contral lateral_Pax7 025.nd2	488.12	304.31	183.81	183.81
15	E8_14d regen contral lateral_Pax7 025.nd2	327.49	263.02	64.47	64.47
16	E8_14d regen contral lateral_Pax7 024.nd2	790.54	371.45	419.09	419.09
17	E8_14d regen contral lateral_Pax7 024.nd2	660.88	403.53	257.35	257.35
18	E8_14d regen contral lateral_Pax7 024.nd2	617.91	383.74	234.17	234.17
19	E8_14d regen contral lateral_Pax7 024.nd2	638.71	331.46	307.25	307.25
20	E8_14d regen contral lateral_Pax7 023.nd2	584.74	303.82	280.92	280.92
21	E8_14d regen contral lateral_Pax7 023.nd2	392.56	269.35	123.21	123.21
22	E8_14d regen contral lateral_Pax7 023.nd2	434.31	235.99	198.32	198.32
23	E8_14d regen contral lateral_Pax7 023.nd2	566.64	285.05	281.59	281.59
24	E8_14d regen contral lateral_Pax7 023.nd2	432.27	280.01	152.26	152.26
25	E8_14d regen contral lateral_Pax7 022.nd2	829.63	477.89	351.74	351.74
26	E8_14d regen contral lateral_Pax7 022.nd2	614.99	357.37	257.62	257.62
27	E8_14d regen contral lateral_Pax7 022.nd2	1055.77	516.33	539.44	539.44
28	E8_14d regen contral lateral_Pax7 022.nd2	732.36	307.77	424.59	424.59
29	E8_14d regen contral lateral_Pax7 022.nd2	777.37	508.38	268.99	268.99
30	E8_14d regen contral lateral_Pax7 022.nd2	666.36	404.88	261.48	261.48
31	E8_14d regen contral lateral_Pax7 020.nd2	611.71	289.96	321.75	321.75
32	E8_14d regen contral lateral_Pax7 020.nd2	472.68	287.83	184.85	184.85
33	E8_14d regen contral lateral_Pax7 020.nd2	452.05	261.67	190.38	190.38
34	E8_14d regen contral lateral_Pax7 018.nd2	893.47	516.67	376.8	376.8
35	E8_14d regen contral lateral_Pax7 018.nd2	990.24	809.57	180.67	180.67
36	E8_14d regen contral lateral_Pax7 017.nd2	764.23	439.05	325.18	325.18
37	E8_14d regen contral lateral_Pax7 017.nd2	926.42	533.34	393.08	393.08
38	E8_14d regen contral lateral_Pax7 017.nd2	788.28	668.58	119.7	119.7
39	E8_14d regen contral lateral_Pax7 016.nd2	557.03	283.98	273.05	273.05
40	E8_14d regen contral lateral_Pax7 016.nd2	664.66	280.98	383.68	383.68
41	E8_14d regen contral lateral_Pax7 015.nd2	666.98	359.87	307.11	307.11
42	E8_14d regen contral lateral_Pax7 015.nd2	771.82	294.52	477.3	477.3
43	E8_14d regen contral lateral_Pax7 015.nd2	615.65	357.92	257.73	257.73
44	E8_14d regen contral lateral_Pax7 014.nd2	491.81	299.01	192.8	192.8
45	E8_14d regen contral lateral_Pax7 014.nd2	478.8	220.02	258.78	258.78
46	E8_14d regen contral lateral_Pax7 014.nd2	465.25	311.11	154.14	154.14
47	E8_14d regen contral lateral_Pax7 014.nd2	465.12	233.68	231.44	231.44
48	E8_14d regen contral lateral_Pax7 014.nd2	435.67	243.43	192.24	192.24
49	E8_14d regen contral lateral_Pax7 013.nd2	600.34	351.26	249.08	249.08
50	E8_14d regen contral lateral_Pax7 013.nd2	517.95	304.34	213.61	213.61
51	E8_14d regen contral lateral_Pax7 013.nd2	458.61	294.13	164.48	164.48
52	E8_14d regen contral lateral_Pax7 013.nd2	525.01	253.87	271.14	271.14
53	E8_14d regen contral lateral_Pax7 013.nd2	510.96	334.35	176.61	176.61
54	E8_14d regen contral lateral_Pax7 013.nd2	604.58	309.58	295	295
55	E8_14d regen contral lateral_Pax7 012.nd2	675.37	476.48	198.89	198.89
56	E8_14d regen contral lateral_Pax7 012.nd2	636.46	372.11	264.35	264.35
57	E8_14d regen contral lateral_Pax7 012.nd2	640.57	379.49	261.08	261.08
58	E8_14d regen contral lateral_Pax7 012.nd2	624.51	391.16	233.35	233.35
59	E8_14d regen contral lateral_Pax7 011.nd2	641.12	326.7	314.42	314.42
60	E8_14d regen contral lateral_Pax7 011.nd2	573.51	395.61	177.9	177.9
61	E8_14d regen contral lateral_Pax7 011.nd2	615.71	357.31	258.4	258.4
62	E8_14d regen contral lateral_Pax7 011.nd2	667.93	316.17	351.76	351.76
63	E8_14d regen contral lateral_Pax7 011.nd2	592.85	372.56	220.29	220.29
64	E8_14d regen contral lateral_Pax7 011.nd2	666.31	474.56	191.75	191.75
65	E8_14d regen contral lateral_Pax7 011.nd2	534.71	359.15	175.56	175.56
66	E8_14d regen contral lateral_Pax7 010.nd2	679.05	472.11	206.94	206.94
67	E8_14d regen contral lateral_Pax7 010.nd2	664.48	406.78	257.7	257.7
68	E8_14d regen contral lateral_Pax7 010.nd2	606.55	477.24	129.31	129.31
69	E8_14d regen contral lateral_Pax7 010.nd2	776.65	477.11	299.54	299.54
70	E8_14d regen contral lateral_Pax7 009.nd2	649.52	375.92	273.6	273.6
71	E8_14d regen contral lateral_Pax7 009.nd2	750.09	365.88	384.21	384.21
72	E8_14d regen contral lateral_Pax7 009.nd2	633.99	408.06	225.93	225.93
73	E8_14d regen contral lateral_Pax7 009.nd2	606.42	376.27	230.15	230.15
74	E8_14d regen contral lateral_Pax7 008.nd2	685.08	372.42	312.66	312.66
75	E8_14d regen contral lateral_Pax7 008.nd2	589.95	286.04	303.91	303.91
76	E8_14d regen contral lateral_Pax7 008.nd2	608.51	339.1	269.41	269.41
77	E8_14d regen contral lateral_Pax7 008.nd2	670.46	344.72	325.74	325.74
78	E8_14d regen contral lateral_Pax7 008.nd2	516.05	330.38	185.67	185.67
79	E8_14d regen contral lateral_Pax7 008.nd2	946.94	348.51	598.43	598.43
80	E8_14d regen contral lateral_Pax7 007.nd2	665.1	306.94	358.16	358.16
81	E8_14d regen contral lateral_Pax7 007.nd2	669.08	268.13	400.95	400.95
82	E8_14d regen contral lateral_Pax7 007.nd2	449.07	229	220.07	220.07
83	E8_14d regen contral lateral_Pax7 007.nd2	588.77	288.93	299.84	299.84
84	E8_14d regen contral lateral_Pax7 007.nd2	495.43	305.61	189.82	189.82
85	E8_14d regen contral lateral_Pax7 007.nd2	437.81	273	164.81	164.81
86	E8_14d regen contral lateral_Pax7 006.nd2	474.35	298.69	175.66	175.66
87	E8_14d regen contral lateral_Pax7 006.nd2	412.73	255.08	157.65	157.65
88	E8_14d regen contral lateral_Pax7 006.nd2	464.81	270.29	194.52	194.52
89	E8_14d regen contral lateral_Pax7 006.nd2	387.3	219.76	167.54	167.54
90	E8_14d regen contral lateral_Pax7 006.nd2	524.64	248.72	275.92	275.92
91	E8_14d regen contral lateral_Pax7 005.nd2	671.02	299.34	371.68	371.68
92	E8_14d regen contral lateral_Pax7 005.nd2	627.38	287.35	340.03	340.03
93	E8_14d regen contral lateral_Pax7 005.nd2	523.24	291.53	231.71	231.71
94	E8_14d regen contral lateral_Pax7 004.nd2	400.15	226.26	173.89	173.89
95	E8_14d regen contral lateral_Pax7 004.nd2	432.76	277.09	155.67	155.67
96	E8_14d regen contral lateral_Pax7 004.nd2	330.99	272.99	58	58
97	E8_14d regen contral lateral_Pax7 004.nd2	404.78	243.62	161.16	161.16
98	E8_14d regen contral lateral_Pax7 003.nd2	479.14	286.8	192.34	192.34
99	E8_14d regen contral lateral_Pax7 003.nd2	536.16	254.78	281.38	281.38
100	E8_14d regen contral lateral_Pax7 003.nd2	545.33	293.6	251.73	251.73
101	E8_14d regen contral lateral_Pax7 002.nd2	544.63	292.83	251.8	251.8
102	E8_14d regen contral lateral_Pax7 001.nd2	447.28	319.08	128.2	128.2
103	E8_14d regen contral lateral_Pax7 031.nd2	726.49	382.02	344.47	344.47
104	E8_14d regen contral lateral_Pax7 032.nd2	752.1	336.74	415.36	415.36
105	E8_14d regen contral lateral_Pax7 032.nd2	524.6	276.45	248.15	248.15
106	E8_14d regen contral lateral_Pax7 033.nd2	834.31	391.63	442.68	442.68
107	E8_14d regen contral lateral_Pax7 033.nd2	544	331.8	212.2	212.2
