# Supplementary material for: Heterogeneous levels of delta-like 4 within a multinucleated niche cell maintains muscle stem cell diversity
Source: eLife. 2022 Dec 30;11:e68180. doi: 10.7554/eLife.68180 (PMC9803355; doi:10.7554/eLife.68180)
Supplement: Figure 5—source data 7. [file elife-68180-fig5-data7.xlsx]

## Sheet: Ctrl1_inj TA_Pax7
Item	Source	Pax7 (Cy5) Mean Intensity	Cy5 background	Pax7 intensity- background intensity	Corrected minus to zeros
1	C1_14d regen_Pax7-050.nd2	856.24	365.14	491.1	491.1
2	C1_14d regen_Pax7-050.nd2	626.04	386.48	239.56	239.56
3	C1_14d regen_Pax7-050.nd2	815.82	355.34	460.48	460.48
4	C1_14d regen_Pax7-050.nd2	747.59	341.58	406.01	406.01
5	C1_14d regen_Pax7-050.nd2	538.03	373.82	164.21	164.21
6	C1_14d regen_Pax7-050.nd2	682.96	349.83	333.13	333.13
7	C1_14d regen_Pax7-050.nd2	760.72	360.19	400.53	400.53
8	C1_14d regen_Pax7-050.nd2	379.06	329	50.06	50.06
9	C1_14d regen_Pax7-050.nd2	542.6	311.39	231.21	231.21
10	C1_14d regen_Pax7-050.nd2	563.71	319.29	244.42	244.42
11	C1_14d regen_Pax7-050.nd2	687.34	375.31	312.03	312.03
12	C1_14d regen_Pax7-050.nd2	524.73	355.25	169.48	169.48
13	C1_14d regen_Pax7-050.nd2	545.04	398.31	146.73	146.73
14	C1_14d regen_Pax7-049.nd2	728.44	417.61	310.83	310.83
15	C1_14d regen_Pax7-049.nd2	528.29	393.65	134.64	134.64
16	C1_14d regen_Pax7-049.nd2	491.94	391.52	100.42	100.42
17	C1_14d regen_Pax7-049.nd2	782.41	365.38	417.03	417.03
18	C1_14d regen_Pax7-049.nd2	551.7	360.17	191.53	191.53
19	C1_14d regen_Pax7-049.nd2	861.55	485.09	376.46	376.46
20	C1_14d regen_Pax7-049.nd2	742.43	368.85	373.58	373.58
21	C1_14d regen_Pax7-049.nd2	502.49	371.46	131.03	131.03
22	C1_14d regen_Pax7-049.nd2	477.93	362.01	115.92	115.92
23	C1_14d regen_Pax7-049.nd2	563.71	317.86	245.85	245.85
24	C1_14d regen_Pax7-049.nd2	725.89	366.4	359.49	359.49
25	C1_14d regen_Pax7-048.nd2	550.67	306.75	243.92	243.92
26	C1_14d regen_Pax7-048.nd2	636.04	342.65	293.39	293.39
27	C1_14d regen_Pax7-048.nd2	603.28	323.27	280.01	280.01
28	C1_14d regen_Pax7-048.nd2	747.43	361.71	385.72	385.72
29	C1_14d regen_Pax7-048.nd2	810.6	352.75	457.85	457.85
30	C1_14d regen_Pax7-048.nd2	689.46	351.24	338.22	338.22
31	C1_14d regen_Pax7-048.nd2	507.64	324.08	183.56	183.56
32	C1_14d regen_Pax7-048.nd2	451.5	268.51	182.99	182.99
33	C1_14d regen_Pax7-048.nd2	582.3	312.61	269.69	269.69
34	C1_14d regen_Pax7-048.nd2	496.79	317.3	179.49	179.49
35	C1_14d regen_Pax7-048.nd2	575.89	321.57	254.32	254.32
36	C1_14d regen_Pax7-048.nd2	544.07	368.82	175.25	175.25
37	C1_14d regen_Pax7-048.nd2	439.19	297.77	141.42	141.42
38	C1_14d regen_Pax7-048.nd2	560.63	343.63	217	217
39	C1_14d regen_Pax7-048.nd2	514.2	406.79	107.41	107.41
40	C1_14d regen_Pax7-047.nd2	938.53	494.67	443.86	443.86
41	C1_14d regen_Pax7-047.nd2	899.89	398.07	501.82	501.82
42	C1_14d regen_Pax7-047.nd2	663.73	364.51	299.22	299.22
43	C1_14d regen_Pax7-047.nd2	772.75	478.41	294.34	294.34
44	C1_14d regen_Pax7-047.nd2	495.67	347.81	147.86	147.86
45	C1_14d regen_Pax7-047.nd2	544.63	330.37	214.26	214.26
46	C1_14d regen_Pax7-047.nd2	536.11	377.4	158.71	158.71
47	C1_14d regen_Pax7-047.nd2	724.2	346.73	377.47	377.47
48	C1_14d regen_Pax7-047.nd2	770.66	391.27	379.39	379.39
49	C1_14d regen_Pax7-047.nd2	715.82	402.62	313.2	313.2
50	C1_14d regen_Pax7-047.nd2	452.52	291.6	160.92	160.92
51	C1_14d regen_Pax7-047.nd2	447.99	345.61	102.38	102.38
52	C1_14d regen_Pax7-047.nd2	384.04	278.97	105.07	105.07
53	C1_14d regen_Pax7-047.nd2	565.1	417.12	147.98	147.98
54	C1_14d regen_Pax7-047.nd2	582.71	403.57	179.14	179.14
55	C1_14d regen_Pax7-046.nd2	984.27	429.02	555.25	555.25
56	C1_14d regen_Pax7-046.nd2	842.32	456.19	386.13	386.13
57	C1_14d regen_Pax7-046.nd2	792.79	407.27	385.52	385.52
58	C1_14d regen_Pax7-046.nd2	664.29	369.84	294.45	294.45
59	C1_14d regen_Pax7-046.nd2	704.45	448.25	256.2	256.2
60	C1_14d regen_Pax7-046.nd2	721	416.08	304.92	304.92
61	C1_14d regen_Pax7-046.nd2	524.25	356.42	167.83	167.83
62	C1_14d regen_Pax7-046.nd2	598.63	422.8	175.83	175.83
63	C1_14d regen_Pax7-046.nd2	772.18	471.38	300.8	300.8
64	C1_14d regen_Pax7-046.nd2	769.21	516.18	253.03	253.03
65	C1_14d regen_Pax7-046.nd2	747.31	422.65	324.66	324.66
66	C1_14d regen_Pax7-046.nd2	569.46	389.68	179.78	179.78
67	C1_14d regen_Pax7-045.nd2	586.72	393.25	193.47	193.47
68	C1_14d regen_Pax7-045.nd2	611.71	439.76	171.95	171.95
69	C1_14d regen_Pax7-045.nd2	629.47	341.67	287.8	287.8
70	C1_14d regen_Pax7-045.nd2	687.49	435.36	252.13	252.13
71	C1_14d regen_Pax7-045.nd2	485.71	403.04	82.67	82.67
72	C1_14d regen_Pax7-044.nd2	500.64	302.91	197.73	197.73
73	C1_14d regen_Pax7-044.nd2	660.85	310.36	350.49	350.49
74	C1_14d regen_Pax7-044.nd2	591.29	370.36	220.93	220.93
75	C1_14d regen_Pax7-044.nd2	405.22	290.96	114.26	114.26
76	C1_14d regen_Pax7-044.nd2	631.05	399.02	232.03	232.03
77	C1_14d regen_Pax7-044.nd2	630.57	364.39	266.18	266.18
78	C1_14d regen_Pax7-044.nd2	653.98	367.32	286.66	286.66
79	C1_14d regen_Pax7-044.nd2	595.68	342.91	252.77	252.77
80	C1_14d regen_Pax7-044.nd2	549.42	285.38	264.04	264.04
81	C1_14d regen_Pax7-044.nd2	527.36	372.99	154.37	154.37
82	C1_14d regen_Pax7-043.nd2	891.43	559.08	332.35	332.35
83	C1_14d regen_Pax7-043.nd2	983.91	524.87	459.04	459.04
84	C1_14d regen_Pax7-043.nd2	730.46	469.35	261.11	261.11
85	C1_14d regen_Pax7-043.nd2	667.89	386.62	281.27	281.27
86	C1_14d regen_Pax7-043.nd2	574.3	396.3	178	178
87	C1_14d regen_Pax7-043.nd2	497.31	327.32	169.99	169.99
88	C1_14d regen_Pax7-043.nd2	485.14	391.32	93.82	93.82
89	C1_14d regen_Pax7-043.nd2	784.93	474.13	310.8	310.8
90	C1_14d regen_Pax7-043.nd2	554.01	392.94	161.07	161.07
91	C1_14d regen_Pax7-043.nd2	621.46	489.42	132.04	132.04
92	C1_14d regen_Pax7-043.nd2	578.86	451.08	127.78	127.78
93	C1_14d regen_Pax7-043.nd2	703.18	442.14	261.04	261.04
94	C1_14d regen_Pax7-042.nd2	1169.96	574.24	595.72	595.72
95	C1_14d regen_Pax7-042.nd2	943.9	474.82	469.08	469.08
96	C1_14d regen_Pax7-042.nd2	704.22	537.93	166.29	166.29
97	C1_14d regen_Pax7-042.nd2	743.1	452.89	290.21	290.21
98	C1_14d regen_Pax7-042.nd2	737.61	420.05	317.56	317.56
99	C1_14d regen_Pax7-042.nd2	556	356.26	199.74	199.74
100	C1_14d regen_Pax7-042.nd2	539.13	376.9	162.23	162.23
101	C1_14d regen_Pax7-042.nd2	771.12	429.58	341.54	341.54
102	C1_14d regen_Pax7-042.nd2	711.22	464.68	246.54	246.54
103	C1_14d regen_Pax7-042.nd2	513.83	300.23	213.6	213.6
104	C1_14d regen_Pax7-042.nd2	631.76	371.21	260.55	260.55
105	C1_14d regen_Pax7-042.nd2	551.31	420.58	130.73	130.73
106	C1_14d regen_Pax7-042.nd2	523.1	399.98	123.12	123.12
107	C1_14d regen_Pax7-042.nd2	472.14	329.9	142.24	142.24
108	C1_14d regen_Pax7-042.nd2	905.2	514.23	390.97	390.97
109	C1_14d regen_Pax7-042.nd2	766.35	460.11	306.24	306.24
110	C1_14d regen_Pax7-041.nd2	967.68	514.19	453.49	453.49
111	C1_14d regen_Pax7-041.nd2	1276.98	503.08	773.9	773.9
112	C1_14d regen_Pax7-041.nd2	1006.13	628.5	377.63	377.63
113	C1_14d regen_Pax7-041.nd2	589.79	287.19	302.6	302.6
114	C1_14d regen_Pax7-041.nd2	592.29	378.97	213.32	213.32
115	C1_14d regen_Pax7-041.nd2	780.54	375.43	405.11	405.11

## Sheet: Ctrl3_inj TA_Pax7
Item	Source	Pax7 (Cy5) Mean Intensity	Cy5 background	Pax7 intensity- background intensity	Corrected minus to zeros
1	C3_14d regen_Pax7-008.nd2	512.84	365.28	147.56	147.56
2	C3_14d regen_Pax7-008.nd2	500.13	368.25	131.88	131.88
3	C3_14d regen_Pax7-008.nd2	451.68	293.12	158.56	158.56
4	C3_14d regen_Pax7-007.nd2	1534.94	671.52	863.42	863.42
5	C3_14d regen_Pax7-007.nd2	824.48	461.82	362.66	362.66
6	C3_14d regen_Pax7-006.nd2	788.79	454.54	334.25	334.25
7	C3_14d regen_Pax7-006.nd2	804.5	580.25	224.25	224.25
8	C3_14d regen_Pax7-005.nd2	978.48	481.82	496.66	496.66
9	C3_14d regen_Pax7-005.nd2	532.28	316.37	215.91	215.91
10	C3_14d regen_Pax7-005.nd2	548.79	306.62	242.17	242.17
11	C3_14d regen_Pax7-005.nd2	469.14	275.66	193.48	193.48
12	C3_14d regen_Pax7-005.nd2	439.68	218.64	221.04	221.04
13	C3_14d regen_Pax7-005.nd2	703.55	358.01	345.54	345.54
14	C3_14d regen_Pax7-005.nd2	633.83	420.5	213.33	213.33
15	C3_14d regen_Pax7-005.nd2	936.46	508.93	427.53	427.53
16	C3_14d regen_Pax7-004.nd2	907.55	584.17	323.38	323.38
17	C3_14d regen_Pax7-004.nd2	571.68	372.27	199.41	199.41
18	C3_14d regen_Pax7-004.nd2	620.28	304.06	316.22	316.22
19	C3_14d regen_Pax7-004.nd2	1572.51	826.87	745.64	745.64
20	C3_14d regen_Pax7-004.nd2	2146.49	1549.58	596.91	596.91
21	C3_14d regen_Pax7-004.nd2	1474.86	800.27	674.59	674.59
22	C3_14d regen_Pax7-004.nd2	1515.65	628.84	886.81	886.81
23	C3_14d regen_Pax7-004.nd2	911.5	406.28	505.22	505.22
24	C3_14d regen_Pax7-003.nd2	1060.36	352.32	708.04	708.04
25	C3_14d regen_Pax7-003.nd2	590.26	331.23	259.03	259.03
26	C3_14d regen_Pax7-003.nd2	653.36	285.97	367.39	367.39
27	C3_14d regen_Pax7-003.nd2	638.42	301.48	336.94	336.94
28	C3_14d regen_Pax7-003.nd2	592.04	285.16	306.88	306.88
29	C3_14d regen_Pax7-002.nd2	898.78	502.91	395.87	395.87
30	C3_14d regen_Pax7-002.nd2	1293.97	599.47	694.5	694.5
31	C3_14d regen_Pax7-002.nd2	710.81	411.62	299.19	299.19
32	C3_14d regen_Pax7-002.nd2	786.84	302.27	484.57	484.57
33	C3_14d regen_Pax7-002.nd2	1777.66	416.7	1360.96	1360.96
34	C3_14d regen_Pax7-002.nd2	925.81	652.41	273.4	273.4
35	C3_14d regen_Pax7-001.nd2	1077.07	449.97	627.1	627.1
36	C3_14d regen_Pax7-001.nd2	901.69	303.94	597.75	597.75
37	C3_14d regen_Pax7-001.nd2	650.5	349.81	300.69	300.69
38	C3_14d regen_Pax7-001.nd2	727.99	360.21	367.78	367.78
39	C3_14d regen_Pax7-001.nd2	1035.45	279.73	755.72	755.72
40	C3_14d regen_Pax7-020.nd2	766.75	407.74	359.01	359.01
41	C3_14d regen_Pax7-019.nd2	1089.48	287.71	801.77	801.77
42	C3_14d regen_Pax7-019.nd2	773.49	402.02	371.47	371.47
43	C3_14d regen_Pax7-019.nd2	748.33	363.74	384.59	384.59
44	C3_14d regen_Pax7-019.nd2	654.88	451.74	203.14	203.14
45	C3_14d regen_Pax7-018.nd2	875.85	401.94	473.91	473.91
46	C3_14d regen_Pax7-018.nd2	757.43	545.2	212.23	212.23
47	C3_14d regen_Pax7-018.nd2	1243.52	349.17	894.35	894.35
48	C3_14d regen_Pax7-017.nd2	1012.19	383.42	628.77	628.77
49	C3_14d regen_Pax7-017.nd2	1116.44	470.4	646.04	646.04
50	C3_14d regen_Pax7-017.nd2	601.59	238.39	363.2	363.2
51	C3_14d regen_Pax7-017.nd2	690.89	317.92	372.97	372.97
52	C3_14d regen_Pax7-017.nd2	1631	541.26	1089.74	1089.74
53	C3_14d regen_Pax7-016.nd2	776.78	350.01	426.77	426.77
54	C3_14d regen_Pax7-016.nd2	906.61	261.91	644.7	644.7
55	C3_14d regen_Pax7-015.nd2	854.7	368.8	485.9	485.9
56	C3_14d regen_Pax7-015.nd2	975	396.41	578.59	578.59
57	C3_14d regen_Pax7-015.nd2	886.49	456.93	429.56	429.56
58	C3_14d regen_Pax7-015.nd2	724.49	368.36	356.13	356.13
59	C3_14d regen_Pax7-015.nd2	773.09	330.19	442.9	442.9
60	C3_14d regen_Pax7-013.nd2	954.57	516.94	437.63	437.63
61	C3_14d regen_Pax7-013.nd2	887.56	273.94	613.62	613.62
62	C3_14d regen_Pax7-013.nd2	799.26	351.37	447.89	447.89
63	C3_14d regen_Pax7-012.nd2	1053.18	393.77	659.41	659.41
64	C3_14d regen_Pax7-012.nd2	951.22	560.1	391.12	391.12
65	C3_14d regen_Pax7-010.nd2	390.41	264.01	126.4	126.4
66	C3_14d regen_Pax7-010.nd2	338.53	273.8	64.73	64.73
67	C3_14d regen_Pax7-009.nd2	307.51	223.65	83.86	83.86
68	C3_14d regen_Pax7-030.nd2	1061.19	455.65	605.54	605.54
69	C3_14d regen_Pax7-030.nd2	863.83	607.51	256.32	256.32
70	C3_14d regen_Pax7-030.nd2	832.25	424.43	407.82	407.82
71	C3_14d regen_Pax7-030.nd2	869.64	417.46	452.18	452.18
72	C3_14d regen_Pax7-030.nd2	785.35	404.01	381.34	381.34
73	C3_14d regen_Pax7-030.nd2	628.9	402.79	226.11	226.11
74	C3_14d regen_Pax7-030.nd2	686.89	576.88	110.01	110.01
75	C3_14d regen_Pax7-029.nd2	1439.5	435.99	1003.51	1003.51
76	C3_14d regen_Pax7-029.nd2	1035.11	654.04	381.07	381.07
77	C3_14d regen_Pax7-029.nd2	1552.38	995.64	556.74	556.74
78	C3_14d regen_Pax7-029.nd2	928.5	471.19	457.31	457.31
79	C3_14d regen_Pax7-029.nd2	1221.07	544.03	677.04	677.04
80	C3_14d regen_Pax7-029.nd2	1054.07	637	417.07	417.07
81	C3_14d regen_Pax7-029.nd2	1207.16	618.54	588.62	588.62
82	C3_14d regen_Pax7-028.nd2	1511.89	427.83	1084.06	1084.06
83	C3_14d regen_Pax7-028.nd2	916.35	573.29	343.06	343.06
84	C3_14d regen_Pax7-028.nd2	980.47	305.9	674.57	674.57
85	C3_14d regen_Pax7-028.nd2	680.1	344.27	335.83	335.83
86	C3_14d regen_Pax7-028.nd2	822.53	627.32	195.21	195.21
87	C3_14d regen_Pax7-027.nd2	810.58	482.86	327.72	327.72
88	C3_14d regen_Pax7-027.nd2	999.64	508.13	491.51	491.51
89	C3_14d regen_Pax7-027.nd2	1028.98	587.2	441.78	441.78
90	C3_14d regen_Pax7-026.nd2	1039.9	488.55	551.35	551.35
91	C3_14d regen_Pax7-026.nd2	862.22	508.81	353.41	353.41
92	C3_14d regen_Pax7-026.nd2	740.81	409.16	331.65	331.65
93	C3_14d regen_Pax7-025.nd2	1202.38	646.98	555.4	555.4
94	C3_14d regen_Pax7-024.nd2	1377.86	581.69	796.17	796.17
95	C3_14d regen_Pax7-024.nd2	830.77	413.45	417.32	417.32
96	C3_14d regen_Pax7-023.nd2	449.64	241.06	208.58	208.58
97	C3_14d regen_Pax7-023.nd2	556.05	256.67	299.38	299.38
98	C3_14d regen_Pax7-023.nd2	1064.99	334.09	730.9	730.9
99	C3_14d regen_Pax7-023.nd2	798.08	408.66	389.42	389.42
100	C3_14d regen_Pax7-022.nd2	736.92	403.33	333.59	333.59
101	C3_14d regen_Pax7-022.nd2	545.3	256.61	288.69	288.69
102	C3_14d regen_Pax7-021.nd2	938.75	486.59	452.16	452.16
103	C3_14d regen_Pax7-021.nd2	2096.43	540.75	1555.68	1555.68
104	C3_14d regen_Pax7-021.nd2	1267.16	663.74	603.42	603.42
105	C3_14d regen_Pax7-021.nd2	1941.8	637.18	1304.62	1304.62
106	C3_14d regen_Pax7-021.nd2	875.55	463.86	411.69	411.69
107	C3_14d regen_Pax7-021.nd2	1541.8	660.28	881.52	881.52
108	C3_14d regen_Pax7-021.nd2	1476	683.41	792.59	792.59
109	C3_14d regen_Pax7-021.nd2	1047.4	440.88	606.52	606.52
110	C3_14d regen_Pax7-021.nd2	1466.72	472.34	994.38	994.38
111	C3_14d regen_Pax7-021.nd2	1457.78	752.15	705.63	705.63
112	C3_14d regen_Pax7-021.nd2	1428.24	813.2	615.04	615.04

## Sheet: Ctrl6_inj TA_Pax7
Item	Source	Pax7 (Cy5) Mean Intensity	Cy5 background	Pax7 intensity- background intensity	Corrected minus to zeros
1	C6_14d regen_Pax7-010.nd2	880.31	262.66	617.65	617.65
2	C6_14d regen_Pax7-010.nd2	1274.95	350.92	924.03	924.03
3	C6_14d regen_Pax7-010.nd2	713.65	332.99	380.66	380.66
4	C6_14d regen_Pax7-010.nd2	828.49	353.61	474.88	474.88
5	C6_14d regen_Pax7-010.nd2	615.59	286.16	329.43	329.43
6	C6_14d regen_Pax7-010.nd2	879.98	325.07	554.91	554.91
7	C6_14d regen_Pax7-010.nd2	845.02	319.06	525.96	525.96
8	C6_14d regen_Pax7-010.nd2	641	299.63	341.37	341.37
9	C6_14d regen_Pax7-009.nd2	699.47	271.98	427.49	427.49
10	C6_14d regen_Pax7-009.nd2	764.32	277.33	486.99	486.99
11	C6_14d regen_Pax7-009.nd2	547.66	287.34	260.32	260.32
12	C6_14d regen_Pax7-009.nd2	805.57	312.19	493.38	493.38
13	C6_14d regen_Pax7-009.nd2	1065.07	572.19	492.88	492.88
14	C6_14d regen_Pax7-009.nd2	849.54	345.3	504.24	504.24
15	C6_14d regen_Pax7-009.nd2	489.96	251.01	238.95	238.95
16	C6_14d regen_Pax7-008.nd2	1078.93	592.89	486.04	486.04
17	C6_14d regen_Pax7-008.nd2	662.31	274.89	387.42	387.42
18	C6_14d regen_Pax7-008.nd2	524.78	288.83	235.95	235.95
19	C6_14d regen_Pax7-008.nd2	768.36	332.13	436.23	436.23
20	C6_14d regen_Pax7-008.nd2	597.36	310.91	286.45	286.45
21	C6_14d regen_Pax7-008.nd2	512.68	272.1	240.58	240.58
22	C6_14d regen_Pax7-008.nd2	612.53	310.55	301.98	301.98
23	C6_14d regen_Pax7-008.nd2	697.22	278.44	418.78	418.78
24	C6_14d regen_Pax7-008.nd2	977.73	283.54	694.19	694.19
25	C6_14d regen_Pax7-008.nd2	741.39	315.68	425.71	425.71
26	C6_14d regen_Pax7-008.nd2	684.72	347.07	337.65	337.65
27	C6_14d regen_Pax7-008.nd2	784.72	364.73	419.99	419.99
28	C6_14d regen_Pax7-008.nd2	410.48	250.44	160.04	160.04
29	C6_14d regen_Pax7-008.nd2	400.13	216.7	183.43	183.43
30	C6_14d regen_Pax7-008.nd2	554.91	331.94	222.97	222.97
31	C6_14d regen_Pax7-007.nd2	647.19	346.85	300.34	300.34
32	C6_14d regen_Pax7-007.nd2	744.44	329.85	414.59	414.59
33	C6_14d regen_Pax7-007.nd2	901.5	375.23	526.27	526.27
34	C6_14d regen_Pax7-007.nd2	699.22	281.7	417.52	417.52
35	C6_14d regen_Pax7-007.nd2	600.16	325.87	274.29	274.29
36	C6_14d regen_Pax7-007.nd2	649.29	317.21	332.08	332.08
37	C6_14d regen_Pax7-007.nd2	851.73	378.63	473.1	473.1
38	C6_14d regen_Pax7-006.nd2	736.99	412.04	324.95	324.95
39	C6_14d regen_Pax7-006.nd2	886.84	321.04	565.8	565.8
40	C6_14d regen_Pax7-006.nd2	681.37	332	349.37	349.37
41	C6_14d regen_Pax7-006.nd2	660.81	281.72	379.09	379.09
42	C6_14d regen_Pax7-006.nd2	632.28	330.01	302.27	302.27
43	C6_14d regen_Pax7-006.nd2	520.09	392.32	127.77	127.77
44	C6_14d regen_Pax7-006.nd2	464.53	269.52	195.01	195.01
45	C6_14d regen_Pax7-006.nd2	440.91	244.39	196.52	196.52
46	C6_14d regen_Pax7-005.nd2	1280.32	514.56	765.76	765.76
47	C6_14d regen_Pax7-005.nd2	924.28	420.6	503.68	503.68
48	C6_14d regen_Pax7-005.nd2	1067.58	557.54	510.04	510.04
49	C6_14d regen_Pax7-005.nd2	990.13	413.93	576.2	576.2
50	C6_14d regen_Pax7-005.nd2	708.41	397.12	311.29	311.29
51	C6_14d regen_Pax7-005.nd2	1018.69	413.14	605.55	605.55
52	C6_14d regen_Pax7-005.nd2	932.82	373.2	559.62	559.62
53	C6_14d regen_Pax7-005.nd2	458.23	266.2	192.03	192.03
54	C6_14d regen_Pax7-005.nd2	708.9	343.75	365.15	365.15
55	C6_14d regen_Pax7-005.nd2	516.1	333.1	183	183
56	C6_14d regen_Pax7-005.nd2	665.77	326.53	339.24	339.24
57	C6_14d regen_Pax7-005.nd2	640.63	367.77	272.86	272.86
58	C6_14d regen_Pax7-005.nd2	992.46	451.75	540.71	540.71
59	C6_14d regen_Pax7-005.nd2	865.97	476.56	389.41	389.41
60	C6_14d regen_Pax7-005.nd2	882.56	325.56	557	557
61	C6_14d regen_Pax7-005.nd2	818.17	248.9	569.27	569.27
62	C6_14d regen_Pax7-005.nd2	511.26	319.66	191.6	191.6
63	C6_14d regen_Pax7-005.nd2	645.56	280.32	365.24	365.24
64	C6_14d regen_Pax7-005.nd2	725.03	358.57	366.46	366.46
65	C6_14d regen_Pax7-005.nd2	468.43	303.71	164.72	164.72
66	C6_14d regen_Pax7-005.nd2	685.19	458.34	226.85	226.85
67	C6_14d regen_Pax7-005.nd2	829.14	342.38	486.76	486.76
68	C6_14d regen_Pax7-005.nd2	854.91	308.23	546.68	546.68
69	C6_14d regen_Pax7-005.nd2	670.67	339.92	330.75	330.75
70	C6_14d regen_Pax7-005.nd2	767.99	408.63	359.36	359.36
71	C6_14d regen_Pax7-005.nd2	455.42	327.41	128.01	128.01
72	C6_14d regen_Pax7-004.nd2	935.8	444.94	490.86	490.86
73	C6_14d regen_Pax7-004.nd2	668.56	283.12	385.44	385.44
74	C6_14d regen_Pax7-004.nd2	690.74	382.13	308.61	308.61
75	C6_14d regen_Pax7-004.nd2	468.25	289.38	178.87	178.87
76	C6_14d regen_Pax7-004.nd2	513.22	292.51	220.71	220.71
77	C6_14d regen_Pax7-004.nd2	557.38	288.98	268.4	268.4
78	C6_14d regen_Pax7-004.nd2	463.46	227.62	235.84	235.84
79	C6_14d regen_Pax7-004.nd2	616.37	288.44	327.93	327.93
80	C6_14d regen_Pax7-003.nd2	754.52	271.58	482.94	482.94
81	C6_14d regen_Pax7-003.nd2	611.8	359.17	252.63	252.63
82	C6_14d regen_Pax7-003.nd2	680	316.94	363.06	363.06
83	C6_14d regen_Pax7-003.nd2	738.48	353.1	385.38	385.38
84	C6_14d regen_Pax7-003.nd2	440.23	248.74	191.49	191.49
85	C6_14d regen_Pax7-002.nd2	603.19	280.6	322.59	322.59
86	C6_14d regen_Pax7-002.nd2	491.65	252.31	239.34	239.34
87	C6_14d regen_Pax7-002.nd2	725.07	372.03	353.04	353.04
88	C6_14d regen_Pax7-001.nd2	700.4	354.87	345.53	345.53
89	C6_14d regen_Pax7-001.nd2	823.8	360.23	463.57	463.57
90	C6_14d regen_Pax7-001.nd2	524.7	299.43	225.27	225.27
91	C6_14d regen_Pax7-001.nd2	820.15	414.64	405.51	405.51
92	C6_14d regen_Pax7-001.nd2	579.66	319.57	260.09	260.09
93	C6_14d regen_Pax7-001.nd2	639.55	310.07	329.48	329.48
94	C6_14d regen_Pax7-001.nd2	872.47	299.38	573.09	573.09
95	C6_14d regen_Pax7-001.nd2	742.04	442.25	299.79	299.79
96	C6_14d regen_Pax7-001.nd2	498.44	228.34	270.1	270.1
97	C6_14d regen_Pax7-001.nd2	372.97	230.4	142.57	142.57
98	C6_14d regen_Pax7-011.nd2	1222.67	430.27	792.4	792.4
99	C6_14d regen_Pax7-011.nd2	569.52	307.77	261.75	261.75
100	C6_14d regen_Pax7-011.nd2	778.84	376.34	402.5	402.5
101	C6_14d regen_Pax7-011.nd2	533.7	256.89	276.81	276.81
102	C6_14d regen_Pax7-011.nd2	787.74	311.03	476.71	476.71
103	C6_14d regen_Pax7-011.nd2	656.27	321.11	335.16	335.16
104	C6_14d regen_Pax7-011.nd2	884.02	433.85	450.17	450.17
105	C6_14d regen_Pax7-011.nd2	451.15	160.19	290.96	290.96
106	C6_14d regen_Pax7-011.nd2	610.04	238.51	371.53	371.53
107	C6_14d regen_Pax7-011.nd2	911.72	293.59	618.13	618.13
108	C6_14d regen_Pax7-011.nd2	714.53	254.42	460.11	460.11
109	C6_14d regen_Pax7-011.nd2	766.29	237.49	528.8	528.8
110	C6_14d regen_Pax7-011.nd2	505.42	283.09	222.33	222.33

## Sheet: Expt2_inj TA_PAx7
Item	Source	Pax7 (Cy5) Mean Intensity	Cy5 background	Pax7 intensity- background intensity	Corrected minus to zeros
1	E2_14d regen_Pax7-050.nd2	717.64	526.81	190.83	190.83
2	E2_14d regen_Pax7-050.nd2	743.2	410.24	332.96	332.96
3	E2_14d regen_Pax7-050.nd2	859.37	375.89	483.48	483.48
4	E2_14d regen_Pax7-050.nd2	535.14	309.78	225.36	225.36
5	E2_14d regen_Pax7-050.nd2	466.85	290.34	176.51	176.51
6	E2_14d regen_Pax7-050.nd2	469.23	303	166.23	166.23
7	E2_14d regen_Pax7-050.nd2	386.27	249.57	136.7	136.7
8	E2_14d regen_Pax7-050.nd2	771.05	379.24	391.81	391.81
9	E2_14d regen_Pax7-049.nd2	484.08	240.73	243.35	243.35
10	E2_14d regen_Pax7-049.nd2	647.01	266.95	380.06	380.06
11	E2_14d regen_Pax7-049.nd2	575.62	260.66	314.96	314.96
12	E2_14d regen_Pax7-049.nd2	1048.31	377.34	670.97	670.97
13	E2_14d regen_Pax7-049.nd2	686.59	254.63	431.96	431.96
14	E2_14d regen_Pax7-049.nd2	498.31	265.92	232.39	232.39
15	E2_14d regen_Pax7-048.nd2	1253.34	430.73	822.61	822.61
16	E2_14d regen_Pax7-048.nd2	1116.07	424.26	691.81	691.81
17	E2_14d regen_Pax7-048.nd2	1614.3	501.36	1112.94	1112.94
18	E2_14d regen_Pax7-048.nd2	1196.05	693.48	502.57	502.57
19	E2_14d regen_Pax7-048.nd2	900.97	491.59	409.38	409.38
20	E2_14d regen_Pax7-048.nd2	726.64	323.25	403.39	403.39
21	E2_14d regen_Pax7-048.nd2	726.98	412.3	314.68	314.68
22	E2_14d regen_Pax7-048.nd2	1260.4	480.62	779.78	779.78
23	E2_14d regen_Pax7-048.nd2	587.6	267.86	319.74	319.74
24	E2_14d regen_Pax7-048.nd2	614.18	339.86	274.32	274.32
25	E2_14d regen_Pax7-048.nd2	545.89	321.02	224.87	224.87
26	E2_14d regen_Pax7-048.nd2	1075	593.94	481.06	481.06
27	E2_14d regen_Pax7-047.nd2	1062.95	452.61	610.34	610.34
28	E2_14d regen_Pax7-047.nd2	997.14	373.11	624.03	624.03
29	E2_14d regen_Pax7-047.nd2	592.17	299.75	292.42	292.42
30	E2_14d regen_Pax7-047.nd2	725.23	318.19	407.04	407.04
31	E2_14d regen_Pax7-047.nd2	645.04	269.16	375.88	375.88
32	E2_14d regen_Pax7-047.nd2	763	336.97	426.03	426.03
33	E2_14d regen_Pax7-047.nd2	576.3	318.77	257.53	257.53
34	E2_14d regen_Pax7-047.nd2	564.35	327.29	237.06	237.06
35	E2_14d regen_Pax7-047.nd2	1094.81	480.57	614.24	614.24
36	E2_14d regen_Pax7-046.nd2	876.03	418.92	457.11	457.11
37	E2_14d regen_Pax7-046.nd2	1057.54	330.58	726.96	726.96
38	E2_14d regen_Pax7-046.nd2	1267.35	411.95	855.4	855.4
39	E2_14d regen_Pax7-046.nd2	1153.53	400.6	752.93	752.93
40	E2_14d regen_Pax7-045.nd2	549.7	285.18	264.52	264.52
41	E2_14d regen_Pax7-045.nd2	616.78	328.87	287.91	287.91
42	E2_14d regen_Pax7-045.nd2	767.14	538.01	229.13	229.13
43	E2_14d regen_Pax7-045.nd2	900.79	420.55	480.24	480.24
44	E2_14d regen_Pax7-045.nd2	704.72	285.74	418.98	418.98
45	E2_14d regen_Pax7-045.nd2	655.62	339.51	316.11	316.11
46	E2_14d regen_Pax7-044.nd2	985.68	471.82	513.86	513.86
47	E2_14d regen_Pax7-044.nd2	860.46	355.58	504.88	504.88
48	E2_14d regen_Pax7-044.nd2	819.58	544.55	275.03	275.03
49	E2_14d regen_Pax7-044.nd2	769.84	466.67	303.17	303.17
50	E2_14d regen_Pax7-044.nd2	1176.78	486.27	690.51	690.51
51	E2_14d regen_Pax7-044.nd2	612.62	415.14	197.48	197.48
52	E2_14d regen_Pax7-044.nd2	567.96	333.96	234	234
53	E2_14d regen_Pax7-043.nd2	1383.98	626.41	757.57	757.57
54	E2_14d regen_Pax7-043.nd2	885.93	439.99	445.94	445.94
55	E2_14d regen_Pax7-043.nd2	973.32	365.48	607.84	607.84
56	E2_14d regen_Pax7-043.nd2	917.54	418.7	498.84	498.84
57	E2_14d regen_Pax7-043.nd2	603.55	324.42	279.13	279.13
58	E2_14d regen_Pax7-043.nd2	979.15	396.09	583.06	583.06
59	E2_14d regen_Pax7-043.nd2	751.93	289.05	462.88	462.88
60	E2_14d regen_Pax7-042.nd2	950.45	487.9	462.55	462.55
61	E2_14d regen_Pax7-042.nd2	754.22	299.47	454.75	454.75
62	E2_14d regen_Pax7-042.nd2	876.43	331.4	545.03	545.03
63	E2_14d regen_Pax7-041.nd2	1544.97	525.51	1019.46	1019.46
64	E2_14d regen_Pax7-041.nd2	1424.76	464.87	959.89	959.89
65	E2_14d regen_Pax7-041.nd2	1061.41	440.79	620.62	620.62
66	E2_14d regen_Pax7-041.nd2	1501.71	574.65	927.06	927.06
67	E2_14d regen_Pax7-040.nd2	1466.28	463.95	1002.33	1002.33
68	E2_14d regen_Pax7-040.nd2	1000.53	426.34	574.19	574.19
69	E2_14d regen_Pax7-040.nd2	881.24	366.34	514.9	514.9
70	E2_14d regen_Pax7-039.nd2	1847.82	521.07	1326.75	1326.75
71	E2_14d regen_Pax7-039.nd2	566.28	243.64	322.64	322.64
72	E2_14d regen_Pax7-039.nd2	1053.53	431.42	622.11	622.11
73	E2_14d regen_Pax7-038.nd2	1532.42	497.67	1034.75	1034.75
74	E2_14d regen_Pax7-038.nd2	1382.04	424.25	957.79	957.79
75	E2_14d regen_Pax7-038.nd2	957.98	358.07	599.91	599.91
76	E2_14d regen_Pax7-038.nd2	624.33	315.24	309.09	309.09
77	E2_14d regen_Pax7-053.nd2	696.94	314.35	382.59	382.59
78	E2_14d regen_Pax7-053.nd2	524.15	254.49	269.66	269.66
79	E2_14d regen_Pax7-053.nd2	551.88	285.76	266.12	266.12
80	E2_14d regen_Pax7-053.nd2	471.97	303.92	168.05	168.05
81	E2_14d regen_Pax7-052.nd2	927.41	303.49	623.92	623.92
82	E2_14d regen_Pax7-052.nd2	731.79	281.9	449.89	449.89
83	E2_14d regen_Pax7-052.nd2	535.6	246.67	288.93	288.93
84	E2_14d regen_Pax7-052.nd2	759.81	293.98	465.83	465.83
85	E2_14d regen_Pax7-052.nd2	572.62	293.73	278.89	278.89
86	E2_14d regen_Pax7-052.nd2	530.9	267.32	263.58	263.58
87	E2_14d regen_Pax7-051.nd2	1111.55	419.78	691.77	691.77
88	E2_14d regen_Pax7-051.nd2	677.54	294.12	383.42	383.42
89	E2_14d regen_Pax7-051.nd2	1205.48	331.78	873.7	873.7
90	E2_14d regen_Pax7-051.nd2	1308.13	360.44	947.69	947.69
91	E2_14d regen_Pax7-051.nd2	697.81	242.45	455.36	455.36
92	E2_14d regen_Pax7-051.nd2	835.25	338.1	497.15	497.15
93	E2_14d regen_Pax7-051.nd2	726.27	345.33	380.94	380.94
94	E2_14d regen_Pax7-051.nd2	672.67	357.66	315.01	315.01
95	E2_14d regen_Pax7-037.nd2	1195.93	505.55	690.38	690.38
96	E2_14d regen_Pax7-037.nd2	1312.14	433.27	878.87	878.87
97	E2_14d regen_Pax7-037.nd2	615.1	354.32	260.78	260.78
98	E2_14d regen_Pax7-036.nd2	856.81	376.56	480.25	480.25
99	E2_14d regen_Pax7-036.nd2	610.83	299.96	310.87	310.87
100	E2_14d regen_Pax7-036.nd2	996.2	292.17	704.03	704.03
101	E2_14d regen_Pax7-036.nd2	828.15	301.04	527.11	527.11
102	E2_14d regen_Pax7-036.nd2	644.24	320.87	323.37	323.37
103	E2_14d regen_Pax7-036.nd2	664.48	291.82	372.66	372.66
104	E2_14d regen_Pax7-036.nd2	541.66	267.01	274.65	274.65
105	E2_14d regen_Pax7-036.nd2	879.89	393.14	486.75	486.75
106	E2_14d regen_Pax7-035.nd2	1144.37	350.19	794.18	794.18
107	E2_14d regen_Pax7-035.nd2	1384.4	545.66	838.74	838.74
108	E2_14d regen_Pax7-035.nd2	1207.17	463.21	743.96	743.96
109	E2_14d regen_Pax7-035.nd2	1295.37	346	949.37	949.37
110	E2_14d regen_Pax7-035.nd2	1073.82	405.78	668.04	668.04
111	E2_14d regen_Pax7-035.nd2	637.05	226.9	410.15	410.15
112	E2_14d regen_Pax7-002.nd2	1361.72	654.78	706.94	706.94
113	E2_14d regen_Pax7-002.nd2	1479.17	462.84	1016.33	1016.33
114	E2_14d regen_Pax7-002.nd2	706.08	356.7	349.38	349.38
115	E2_14d regen_Pax7-002.nd2	590.3	345.81	244.49	244.49
116	E2_14d regen_Pax7-002.nd2	564.71	322.34	242.37	242.37
117	E2_14d regen_Pax7-002.nd2	1149.4	410.8	738.6	738.6
118	E2_14d regen_Pax7-002.nd2	1171.58	386.43	785.15	785.15
119	E2_14d regen_Pax7-001.nd2	1155.6	533.2	622.4	622.4
120	E2_14d regen_Pax7-001.nd2	1044.39	541.89	502.5	502.5
121	E2_14d regen_Pax7-001.nd2	805.58	277.48	528.1	528.1
122	E2_14d regen_Pax7-003.nd2	908.87	412.87	496	496
123	E2_14d regen_Pax7-003.nd2	801.31	434.54	366.77	366.77
124	E2_14d regen_Pax7-003.nd2	552.75	378.91	173.84	173.84
125	E2_14d regen_Pax7-003.nd2	887.57	270.13	617.44	617.44

## Sheet: Expt7_inj TA_Pax7
Item	Source	Pax7 (Cy5) Mean Intensity	Cy5 background	Pax7 intensity- background intensity	Corrected minus to zeros
1	E7_14d regen_Pax7-010.nd2	540.62	238.3	302.32	302.32
2	E7_14d regen_Pax7-010.nd2	414.75	227.18	187.57	187.57
3	E7_14d regen_Pax7-010.nd2	430.61	203.49	227.12	227.12
4	E7_14d regen_Pax7-010.nd2	340.41	193.02	147.39	147.39
5	E7_14d regen_Pax7-010.nd2	320.89	244.77	76.12	76.12
6	E7_14d regen_Pax7-010.nd2	324.6	202.55	122.05	122.05
7	E7_14d regen_Pax7-010.nd2	343.86	191.24	152.62	152.62
8	E7_14d regen_Pax7-010.nd2	378.51	209.27	169.24	169.24
9	E7_14d regen_Pax7-010.nd2	299.38	187.09	112.29	112.29
10	E7_14d regen_Pax7-010.nd2	464.32	225.28	239.04	239.04
11	E7_14d regen_Pax7-010.nd2	371.91	231.12	140.79	140.79
12	E7_14d regen_Pax7-010.nd2	377.1	237.77	139.33	139.33
13	E7_14d regen_Pax7-010.nd2	364.7	232.64	132.06	132.06
14	E7_14d regen_Pax7-010.nd2	553.69	238.37	315.32	315.32
15	E7_14d regen_Pax7-010.nd2	377.17	232.58	144.59	144.59
16	E7_14d regen_Pax7-010.nd2	483	275.36	207.64	207.64
17	E7_14d regen_Pax7-009.nd2	397.51	233.45	164.06	164.06
18	E7_14d regen_Pax7-009.nd2	324.04	191.53	132.51	132.51
19	E7_14d regen_Pax7-009.nd2	298.07	221.85	76.22	76.22
20	E7_14d regen_Pax7-009.nd2	298.79	224.79	74	74
21	E7_14d regen_Pax7-009.nd2	380.5	215.8	164.7	164.7
22	E7_14d regen_Pax7-009.nd2	377.71	244.86	132.85	132.85
23	E7_14d regen_Pax7-009.nd2	379.91	225.93	153.98	153.98
24	E7_14d regen_Pax7-009.nd2	414.48	244.25	170.23	170.23
25	E7_14d regen_Pax7-009.nd2	478.18	292.09	186.09	186.09
26	E7_14d regen_Pax7-009.nd2	425.45	272.53	152.92	152.92
27	E7_14d regen_Pax7-009.nd2	523.24	250.74	272.5	272.5
28	E7_14d regen_Pax7-009.nd2	380.98	224.17	156.81	156.81
29	E7_14d regen_Pax7-009.nd2	294.37	195.28	99.09	99.09
30	E7_14d regen_Pax7-008.nd2	718.52	364.64	353.88	353.88
31	E7_14d regen_Pax7-008.nd2	482.8	316.12	166.68	166.68
32	E7_14d regen_Pax7-008.nd2	399.37	221.05	178.32	178.32
33	E7_14d regen_Pax7-008.nd2	323.83	216.82	107.01	107.01
34	E7_14d regen_Pax7-008.nd2	343.42	203.26	140.16	140.16
35	E7_14d regen_Pax7-008.nd2	479.92	260.82	219.1	219.1
36	E7_14d regen_Pax7-008.nd2	503.77	227.97	275.8	275.8
37	E7_14d regen_Pax7-008.nd2	319.27	219.94	99.33	99.33
38	E7_14d regen_Pax7-008.nd2	406.66	254.82	151.84	151.84
39	E7_14d regen_Pax7-008.nd2	344.54	212.17	132.37	132.37
40	E7_14d regen_Pax7-008.nd2	400.38	291.37	109.01	109.01
41	E7_14d regen_Pax7-007.nd2	401.2	249.29	151.91	151.91
42	E7_14d regen_Pax7-007.nd2	375.53	203.91	171.62	171.62
43	E7_14d regen_Pax7-007.nd2	405.62	223.13	182.49	182.49
44	E7_14d regen_Pax7-007.nd2	316.95	175.61	141.34	141.34
45	E7_14d regen_Pax7-007.nd2	330.34	219.04	111.3	111.3
46	E7_14d regen_Pax7-006.nd2	344.41	222.05	122.36	122.36
47	E7_14d regen_Pax7-006.nd2	302.1	230.37	71.73	71.73
48	E7_14d regen_Pax7-006.nd2	346.87	233.12	113.75	113.75
49	E7_14d regen_Pax7-006.nd2	312.1	203.52	108.58	108.58
50	E7_14d regen_Pax7-005.nd2	469.56	284.41	185.15	185.15
51	E7_14d regen_Pax7-005.nd2	403.47	290.55	112.92	112.92
52	E7_14d regen_Pax7-005.nd2	357.58	270.15	87.43	87.43
53	E7_14d regen_Pax7-005.nd2	543.95	291.91	252.04	252.04
54	E7_14d regen_Pax7-005.nd2	801.59	318.14	483.45	483.45
55	E7_14d regen_Pax7-005.nd2	363.19	261.23	101.96	101.96
56	E7_14d regen_Pax7-005.nd2	325.18	232.4	92.78	92.78
57	E7_14d regen_Pax7-004.nd2	578.86	295.86	283	283
58	E7_14d regen_Pax7-004.nd2	428.45	291.68	136.77	136.77
59	E7_14d regen_Pax7-004.nd2	433.53	288.52	145.01	145.01
60	E7_14d regen_Pax7-004.nd2	473.94	277.63	196.31	196.31
61	E7_14d regen_Pax7-004.nd2	513.69	288.4	225.29	225.29
62	E7_14d regen_Pax7-004.nd2	454.91	293.25	161.66	161.66
63	E7_14d regen_Pax7-004.nd2	505.25	273.51	231.74	231.74
64	E7_14d regen_Pax7-004.nd2	405.77	275.89	129.88	129.88
65	E7_14d regen_Pax7-003.nd2	389.02	289.02	100	100
66	E7_14d regen_Pax7-003.nd2	377.59	265.14	112.45	112.45
67	E7_14d regen_Pax7-003.nd2	416.35	311.39	104.96	104.96
68	E7_14d regen_Pax7-003.nd2	395.66	258.37	137.29	137.29
69	E7_14d regen_Pax7-003.nd2	351.79	264.95	86.84	86.84
70	E7_14d regen_Pax7-003.nd2	445.16	249.96	195.2	195.2
71	E7_14d regen_Pax7-003.nd2	452.77	266.07	186.7	186.7
72	E7_14d regen_Pax7-003.nd2	364.42	257.43	106.99	106.99
73	E7_14d regen_Pax7-002.nd2	407.39	238.72	168.67	168.67
74	E7_14d regen_Pax7-002.nd2	331.89	236.84	95.05	95.05
75	E7_14d regen_Pax7-002.nd2	407.48	262.28	145.2	145.2
76	E7_14d regen_Pax7-002.nd2	375.96	214.81	161.15	161.15
77	E7_14d regen_Pax7-002.nd2	345.47	232.21	113.26	113.26
78	E7_14d regen_Pax7-002.nd2	397.38	232.18	165.2	165.2
79	E7_14d regen_Pax7-002.nd2	343.09	225.93	117.16	117.16
80	E7_14d regen_Pax7-001.nd2	438.37	225.83	212.54	212.54
81	E7_14d regen_Pax7-001.nd2	339.86	218.22	121.64	121.64
82	E7_14d regen_Pax7-001.nd2	384.29	257.71	126.58	126.58
83	E7_14d regen_Pax7-001.nd2	336.48	221.22	115.26	115.26
84	E7_14d regen_Pax7-001.nd2	377.9	238.94	138.96	138.96
85	E7_14d regen_Pax7-012.nd2	459.88	224.89	234.99	234.99
86	E7_14d regen_Pax7-012.nd2	339.16	223.19	115.97	115.97
87	E7_14d regen_Pax7-012.nd2	388.24	234.14	154.1	154.1
88	E7_14d regen_Pax7-012.nd2	394.69	237.3	157.39	157.39
89	E7_14d regen_Pax7-012.nd2	374.24	211.89	162.35	162.35
90	E7_14d regen_Pax7-011.nd2	693.16	289.56	403.6	403.6
91	E7_14d regen_Pax7-011.nd2	507.82	294.49	213.33	213.33
92	E7_14d regen_Pax7-011.nd2	498.61	321.07	177.54	177.54
93	E7_14d regen_Pax7-011.nd2	359	241.54	117.46	117.46
94	E7_14d regen_Pax7-011.nd2	433.59	266.21	167.38	167.38
95	E7_14d regen_Pax7-011.nd2	598.87	290.48	308.39	308.39
96	E7_14d regen_Pax7-011.nd2	659.49	250.23	409.26	409.26
97	E7_14d regen_Pax7-015.nd2	380.83	240.58	140.25	140.25
98	E7_14d regen_Pax7-015.nd2	363.66	212.35	151.31	151.31
99	E7_14d regen_Pax7-015.nd2	438.39	238.08	200.31	200.31
100	E7_14d regen_Pax7-015.nd2	415.68	237.52	178.16	178.16
101	E7_14d regen_Pax7-015.nd2	478.79	246.15	232.64	232.64
102	E7_14d regen_Pax7-015.nd2	344.77	218.73	126.04	126.04
103	E7_14d regen_Pax7-014.nd2	666.95	275.7	391.25	391.25
104	E7_14d regen_Pax7-014.nd2	602.1	271.98	330.12	330.12
105	E7_14d regen_Pax7-014.nd2	459.53	265.17	194.36	194.36
106	E7_14d regen_Pax7-014.nd2	404.58	244.1	160.48	160.48
107	E7_14d regen_Pax7-014.nd2	390.65	251.7	138.95	138.95
108	E7_14d regen_Pax7-014.nd2	478.68	265.92	212.76	212.76
109	E7_14d regen_Pax7-014.nd2	382.95	244.67	138.28	138.28
110	E7_14d regen_Pax7-014.nd2	382.12	220.2	161.92	161.92
111	E7_14d regen_Pax7-014.nd2	439.23	237.7	201.53	201.53
112	E7_14d regen_Pax7-014.nd2	383.31	195.59	187.72	187.72
113	E7_14d regen_Pax7-014.nd2	474.82	242.1	232.72	232.72
114	E7_14d regen_Pax7-014.nd2	491.91	254.41	237.5	237.5
115	E7_14d regen_Pax7-014.nd2	607.35	248.01	359.34	359.34
116	E7_14d regen_Pax7-014.nd2	481.94	254.96	226.98	226.98
117	E7_14d regen_Pax7-013.nd2	486.2	251.97	234.23	234.23
118	E7_14d regen_Pax7-013.nd2	511.51	222.31	289.2	289.2
119	E7_14d regen_Pax7-013.nd2	479.57	219.28	260.29	260.29
120	E7_14d regen_Pax7-013.nd2	481.79	219.05	262.74	262.74
121	E7_14d regen_Pax7-013.nd2	493.51	211.02	282.49	282.49
122	E7_14d regen_Pax7-013.nd2	439.3	284.63	154.67	154.67

## Sheet: Expt8_inj TA_Pax7
Item	Source	Pax7 (Cy5) Mean Intensity	Cy5 background	Pax7 intensity- background intensity	Corrected minus to zeros
1	E8_14d regen_Pax7-010.nd2	1510.7	708.46	802.24	1303.12
2	E8_14d regen_Pax7-010.nd2	1711.13	710.71	1000.42	1000.42
3	E8_14d regen_Pax7-010.nd2	1190.09	475.28	714.81	714.81
4	E8_14d regen_Pax7-010.nd2	1760.24	735.25	1024.99	1024.99
5	E8_14d regen_Pax7-010.nd2	1342.89	672.92	669.97	669.97
6	E8_14d regen_Pax7-010.nd2	1152.47	423.56	728.91	728.91
7	E8_14d regen_Pax7-010.nd2	1738.33	435.21	1303.12	1303.12
8	E8_14d regen_Pax7-010.nd2	1086.11	726.39	359.72	359.72
9	E8_14d regen_Pax7-010.nd2	970.9	590.96	379.94	379.94
10	E8_14d regen_Pax7-010.nd2	1087.32	644.89	442.43	442.43
11	E8_14d regen_Pax7-010.nd2	1606.5	672.27	934.23	934.23
12	E8_14d regen_Pax7-010.nd2	900.12	560.39	339.73	339.73
13	E8_14d regen_Pax7-010.nd2	1350.6	459.02	891.58	891.58
14	E8_14d regen_Pax7-010.nd2	931.99	647.54	284.45	284.45
15	E8_14d regen_Pax7-009.nd2	1628.07	702.01	926.06	926.06
16	E8_14d regen_Pax7-009.nd2	964.63	600.64	363.99	363.99
17	E8_14d regen_Pax7-009.nd2	1160.11	385.1	775.01	775.01
18	E8_14d regen_Pax7-009.nd2	516.46	303.28	213.18	213.18
19	E8_14d regen_Pax7-009.nd2	1097	306.15	790.85	488.68
20	E8_14d regen_Pax7-009.nd2	1164	875.12	288.88	274.88
21	E8_14d regen_Pax7-009.nd2	1024.2	570.47	453.73	260.52
22	E8_14d regen_Pax7-009.nd2	1491.88	746.9	744.98	224.9
23	E8_14d regen_Pax7-009.nd2	999.53	517.97	481.56	750.31
24	E8_14d regen_Pax7-009.nd2	1566.1	514.67	1051.43	337.17
25	E8_14d regen_Pax7-008.nd2	1797.71	696.68	1101.03	513.26
26	E8_14d regen_Pax7-008.nd2	1252.24	807.31	444.93	176.41
27	E8_14d regen_Pax7-008.nd2	1415.71	742.88	672.83	132.38
28	E8_14d regen_Pax7-008.nd2	1037.21	575.09	462.12	422.74
29	E8_14d regen_Pax7-008.nd2	1247.46	480.34	767.12	767.12
30	E8_14d regen_Pax7-008.nd2	1242.11	513.69	728.42	728.42
31	E8_14d regen_Pax7-008.nd2	1588.15	393.57	1194.58	1194.58
32	E8_14d regen_Pax7-007.nd2	1521.93	653.25	868.68	868.68
33	E8_14d regen_Pax7-007.nd2	1343.62	583.16	760.46	760.46
34	E8_14d regen_Pax7-007.nd2	1866.9	657.03	1209.87	1209.87
35	E8_14d regen_Pax7-006.nd2	1516.71	473.67	1043.04	1043.04
36	E8_14d regen_Pax7-006.nd2	1793.69	529.39	1264.3	1264.3
37	E8_14d regen_Pax7-006.nd2	1425.47	658.06	767.41	767.41
38	E8_14d regen_Pax7-006.nd2	1237.66	626.59	611.07	611.07
39	E8_14d regen_Pax7-006.nd2	1049.43	598.8	450.63	450.63
40	E8_14d regen_Pax7-006.nd2	1586.66	487.28	1099.38	1099.38
41	E8_14d regen_Pax7-006.nd2	1430.19	358.82	1071.37	1071.37
42	E8_14d regen_Pax7-006.nd2	1262.64	597.17	665.47	665.47
43	E8_14d regen_Pax7-005.nd2	1539.97	987.77	552.2	552.2
44	E8_14d regen_Pax7-005.nd2	1279.32	543.85	735.47	735.47
45	E8_14d regen_Pax7-005.nd2	1076.19	673.28	402.91	402.91
46	E8_14d regen_Pax7-005.nd2	737.71	549.07	188.64	188.64
47	E8_14d regen_Pax7-005.nd2	1372.53	1372.53	0	0
48	E8_14d regen_Pax7-005.nd2	809.34	438.76	370.58	370.58
49	E8_14d regen_Pax7-005.nd2	919.49	490.25	429.24	429.24
50	E8_14d regen_Pax7-005.nd2	703.4	605.07	98.33	98.33
51	E8_14d regen_Pax7-005.nd2	1901.12	686.7	1214.42	1214.42
52	E8_14d regen_Pax7-005.nd2	1254.97	446.31	808.66	808.66
53	E8_14d regen_Pax7-005.nd2	834.98	457.85	377.13	377.13
54	E8_14d regen_Pax7-004.nd2	1588.19	632.23	955.96	955.96
55	E8_14d regen_Pax7-004.nd2	1016.32	482.91	533.41	533.41
56	E8_14d regen_Pax7-004.nd2	1076.28	712.91	363.37	363.37
57	E8_14d regen_Pax7-004.nd2	1351.59	811.81	539.78	539.78
58	E8_14d regen_Pax7-004.nd2	923.66	407.12	516.54	516.54
59	E8_14d regen_Pax7-004.nd2	702.01	535.36	166.65	166.65
60	E8_14d regen_Pax7-004.nd2	1023.28	382.46	640.82	640.82
61	E8_14d regen_Pax7-004.nd2	787.57	586.49	201.08	201.08
62	E8_14d regen_Pax7-004.nd2	541.49	307.04	234.45	234.45
63	E8_14d regen_Pax7-004.nd2	593.19	306.79	286.4	286.4
64	E8_14d regen_Pax7-004.nd2	1250.1	382.27	867.83	867.83
65	E8_14d regen_Pax7-003.nd2	1450.74	497.43	953.31	953.31
66	E8_14d regen_Pax7-003.nd2	838.25	324.02	514.23	514.23
67	E8_14d regen_Pax7-003.nd2	734.84	379.48	355.36	355.36
68	E8_14d regen_Pax7-003.nd2	1109.91	579.18	530.73	530.73
69	E8_14d regen_Pax7-003.nd2	1241.53	670.23	571.3	571.3
70	E8_14d regen_Pax7-003.nd2	1217.68	454.13	763.55	763.55
71	E8_14d regen_Pax7-003.nd2	1048.58	509.23	539.35	539.35
72	E8_14d regen_Pax7-003.nd2	853.66	369.49	484.17	484.17
73	E8_14d regen_Pax7-003.nd2	1005.93	580.16	425.77	425.77
74	E8_14d regen_Pax7-003.nd2	1282.54	527.77	754.77	754.77
75	E8_14d regen_Pax7-003.nd2	684.8	478.63	206.17	206.17
76	E8_14d regen_Pax7-003.nd2	742.4	514.81	227.59	227.59
77	E8_14d regen_Pax7-003.nd2	801.61	485	316.61	316.61
78	E8_14d regen_Pax7-003.nd2	730.98	493.65	237.33	237.33
79	E8_14d regen_Pax7-003.nd2	969.34	480.66	488.68	488.68
80	E8_14d regen_Pax7-003.nd2	798.97	524.09	274.88	274.88
81	E8_14d regen_Pax7-003.nd2	621.52	361	260.52	260.52
82	E8_14d regen_Pax7-002.nd2	647.61	422.71	224.9	224.9
83	E8_14d regen_Pax7-002.nd2	1296.87	546.56	750.31	750.31
84	E8_14d regen_Pax7-002.nd2	678.71	341.54	337.17	337.17
85	E8_14d regen_Pax7-002.nd2	998.82	485.56	513.26	513.26
86	E8_14d regen_Pax7-002.nd2	536.5	360.09	176.41	176.41
87	E8_14d regen_Pax7-002.nd2	614.68	482.3	132.38	132.38
88	E8_14d regen_Pax7-002.nd2	878.06	455.32	422.74	422.74
89	E8_14d regen_Pax7-002.nd2	1036.6	497.07	539.53	539.53
90	E8_14d regen_Pax7-002.nd2	881.66	522.54	359.12	359.12
91	E8_14d regen_Pax7-002.nd2	693.77	581.36	112.41	112.41
92	E8_14d regen_Pax7-002.nd2	711.94	449.04	262.9	262.9
93	E8_14d regen_Pax7-001.nd2	684.67	404.48	280.19	280.19
94	E8_14d regen_Pax7-001.nd2	598.15	333.12	265.03	265.03
95	E8_14d regen_Pax7-001.nd2	696.99	315.86	381.13	381.13
96	E8_14d regen_Pax7-001.nd2	580.2	351.91	228.29	228.29
97	E8_14d regen_Pax7-001.nd2	635.35	319.43	315.92	315.92
98	E8_14d regen_Pax7-001.nd2	619.71	313.58	306.13	306.13
99	E8_14d regen_Pax7-001.nd2	906.9	384.17	522.73	522.73
100	E8_14d regen_Pax7-011.nd2	941.57	513.02	428.55	428.55
101	E8_14d regen_Pax7-011.nd2	918.51	406.62	511.89	511.89
102	E8_14d regen_Pax7-011.nd2	1662.27	663.72	998.55	998.55
103	E8_14d regen_Pax7-011.nd2	1389.17	637.73	751.44	751.44
104	E8_14d regen_Pax7-011.nd2	1095.84	512.57	583.27	583.27
105	E8_14d regen_Pax7-011.nd2	1126.06	402.18	723.88	723.88
106	E8_14d regen_Pax7-011.nd2	1531.5	671.06	860.44	860.44
107	E8_14d regen_Pax7-011.nd2	1440.25	670.02	770.23	770.23
