# Supplementary material for: Heterogeneous levels of delta-like 4 within a multinucleated niche cell maintains muscle stem cell diversity
Source: eLife. 2022 Dec 30;11:e68180. doi: 10.7554/eLife.68180 (PMC9803355; doi:10.7554/eLife.68180)
Supplement: Figure 5—source data 8. [file elife-68180-fig5-data8.xlsx]

## Sheet: Ctrl3_061715
Dll4fl/fl	Ctrl 3_061715
30d after tmx
Injury and 14d regeneration
	# of Pax7+ SCs	Area (mm2)	# of Pax7+ SCs/mm2 tissue section	Average
Section 1-001	110	1.83
Section 1-002	91	1.69
Section 1-003	10	0.3
Section 1-004	54	0.86
Section 1-005	32	0.6
	297	5.28	56.25	57.6097
Section2-001	97	1.79
Section2-002	95	1.49
Section2-003	18	0.4
Section2-004	41	0.8
Section2-005	58	0.76
	309	5.24	58.9695

## Sheet: Ctrl5_061715
Dll4fl/fl	Ctrl 5_061715
30d after tmx
Injury and 14d regeneration
	# of Pax7+ SCs	Area (mm2)	# of Pax7+ SCs/mm2 tissue section	Average
Section 1-001	129	1.58
Section 1-002	145	1.77
Section 1-003	65	0.44
Section 1-004	67	0.94
Section 1-005	23	0.29
	429	5.02	85.4582	83.3713
Section2-001	147	1.8
Section2-002	148	1.78
Section2-003	35	0.4
Section2-004	89	1.09
Section2-005	24	0.38
	443	5.45	81.2844

## Sheet: Expt6_061715
Muscle Cre-Dll4fl/fl	Expt 6_061715
30d after tmx
Injury and 14d regeneration
	# of Pax7+ SCs	Area (mm2)	# of Pax7+ SCs/mm2 tissue section	Average
Section 1-001	101	1.57
Section 1-002	99	1.51
Section 1-003	10	0.24
Section 1-004	89	0.9
Section 1-005	32	0.4
	331	4.62	71.645	66.2448
Section2-001	89	1.49
Section2-002	73	1.09
Section2-003	92	1.49
Section2-004	63	1.14
	317	5.21	60.8445

## Sheet: Expt7_061715
Muscle Cre-Dll4fl/fl	Expt 7_061715
30d after tmx
Injury and 14d regeneration
	# of Pax7+ SCs	Area (mm2)	# of Pax7+ SCs/mm2 tissue section	Average
Section 1-001	122	1.67
Section 1-002	122	1.58
Section 1-003	22	0.3
Section 1-004	115	1.28
Section 1-005	42	0.68
	423	5.51	76.7695	82.4873
Section2-001	115	1.6
Section2-002	135	1.61
Section2-003	25	0.3
Section2-004	148	1.44
Section2-005	93	0.9
	516	5.85	88.2051

## Sheet: Ctrl1_112819
Dll4fl/fl	Ctrl 1_112819
30d after tmx
Injury and 14d regeneration
	# of Pax7+ SCs	Area (mm2)	# of Pax7+ SCs/mm2 tissue section	Average
Section 1-001	59	0.98
Section 1-002	97	1.18
Section 1-003	28	0.63
Section 1-004	82	1.47
Section 1-005	156	1.61
	422	5.87	71.891	73.0707
Section2-001	67	1.08
Section2-002	128	1.21
Section2-003	25	0.62
Section2-004	76	1.52
Section2-005	100	1.05
Section2-006	25	0.19
	421	5.67	74.2504

## Sheet: Ctrl9_112819
Dll4fl/fl	Ctrl 9_112819
30d after tmx
Injury and 14d regeneration
	# of Pax7+ SCs	Area (mm2)	# of Pax7+ SCs/mm2 tissue section	Average
Section 1-001	161	1.18
Section 1-002	61	1
Section 1-003	72	1.21
Section 1-004	141	1.59
Section 1-005	45	0.31
	480	5.29	90.7372	97.6455
Section2-001	148	1.41
Section2-002	65	0.83
Section2-003	97	1.3
Section2-004	44	0.25
Section2-005	220	1.7
	574	5.49	104.554

## Sheet: Expt3_112819
Muscle Cre-Dll4fl/fl	Expt3_112819
30d after tmx
Injury and 14d regeneration
	# of Pax7+ SCs	Area (mm2)	# of Pax7+ SCs/mm2 tissue section	Average
Section 1-001	84	1.52
Section 1-002	147	1.49
Section 1-003	6	0.09
Section 1-004	96	1.29
Section 1-005	57	0.61
	390	5	78	81.7083
Section2-001	95	1.5
Section2-002	162	1.09
Section2-003	89	1.18
Section2-004	3	0.04
Section2-005	102	1.47
	451	5.28	85.4167

## Sheet: Expt7_050220
Muscle Cre-Dll4fl/fl	Expt7_050220
30d after tmx
Injury and 14d regeneration
	# of Pax7+ SCs	Area (mm2)	# of Pax7+ SCs/mm2 tissue section	Average
Section 1-001	136	0.87
Section 1-002	142	1.32
Section 1-003	16	0.26
Section 1-004	104	1.3
Section 1-005	63	1.07
Section 1-006	13	0.17
	474	4.99	94.99	96.223
Section2-001	133	1.32
Section2-002	94	1.06
Section2-003	67	0.77
Section2-004	126	1
Section2-005	27	0.41
Section2-006	51	0.55
	498	5.11	97.456

## Sheet: Expt8_050220
Muscle Cre-Dll4fl/fl	Expt8_050220
30d after tmx
Injury and 14d regeneration
	# of Pax7+ SCs	Area (mm2)	# of Pax7+ SCs/mm2 tissue section	Average
Section 1-001	111	1.29
Section 1-002	19	0.16
Section 1-003	55	0.96
Section 1-004	86	1.21
Section 1-005	46	0.66
Section 1-006	28	0.41
	345	4.69	73.5608	77.6895
Section2-001	128	1.2
Section2-002	26	0.29
Section2-003	60	0.9
Section2-004	102	1.4
Section2-005	14	0.21
Section2-006	57	0.73
	387	4.73	81.8182

## Sheet: Expt2_050220
Muscle Cre-Dll4fl/fl	Expt2_050220
30d after tmx
Injury and 14d regeneration
	# of Pax7+ SCs	Area (mm2)	# of Pax7+ SCs/mm2 tissue section	Average
Section 1-001	54	0.89
Section 1-002	50	1.03
Section 1-003	42	0.75
Section 1-004	60	1.06
Section 1-005	71	1.08
Section 1-006	10	0.24
Section1-007	35	0.3
	322	5.35	60.1869	62.3636
Section2-001	66	1
Section2-002	42	0.67
Section2-003	35	0.74
Section2-004	69	0.94
Section2-005	92	1.08
Section2-006	13	0.24
Section2-007	27	0.66
	344	5.33	64.5403

[truncated: 1 more sheets: Ctrl1_050220]
