# Supplementary material for: Heterogeneous levels of delta-like 4 within a multinucleated niche cell maintains muscle stem cell diversity
Source: eLife. 2022 Dec 30;11:e68180. doi: 10.7554/eLife.68180 (PMC9803355; doi:10.7554/eLife.68180)
Supplement: Figure 5—source data 9. [file elife-68180-fig5-data9.xlsx]

## Sheet: Ctrl 2
Control 2	Injury and 40d regeneration
	Cross sectional Area
1	533
2	464
3	645
4	2063
5	1810
6	1103
7	704
8	783
9	933
10	1965
11	968
12	1212
13	982
14	564
15	703
16	1019
17	866
18	752
19	880
20	1224
21	1816
22	1089
23	893
24	725
25	787
26	867
27	1398
28	2296
29	662
30	783
31	927
32	486
33	1723
34	820
35	2628
36	675
37	1098
38	1011
39	971
40	475
41	2467
42	1949
43	1045
44	1047
45	979
46	999
47	494
48	1100
49	2685
50	636
51	1109
52	1877
53	2322
54	1596
55	2493
56	867
57	2302
58	571
59	1291
60	1609
61	1027
62	2870
63	1077
64	904
65	801
66	686
67	925
68	2478
69	3231
70	2490
71	682
72	1230
73	637
74	1454
75	1289
76	1388
77	2159
78	1224
79	978
80	892
81	3461
82	1091
83	1273
84	1416
85	2502
86	954
87	1174
88	1009
89	845
90	792
91	2068
92	1216
93	535
94	497
95	1643
96	1330
97	1622
98	1178
99	1707
100	1793
101	1641
102	1256
103	487
104	843
105	1043
106	647
107	2997
108	635
109	1171
110	2171
111	886
112	850
113	845
114	924
115	1131
116	1481
117	825
118	845
119	1230
120	1815
121	772
122	1982
123	2527
124	1138
125	683
126	737
127	413
128	3204
129	1151
130	741
131	1461
132	1494
133	793
134	1439
135	4386
136	1254
137	1675
138	1569
139	1120
140	1103
141	732
142	1754
143	1573
144	780
145	3150
146	1089
147	1002
148	1529
149	769
150	1958
151	1954
152	716
153	1210
154	2521
155	2024
156	1647
157	2518
158	1100
159	950
160	708
161	1144
162	1001
163	783
164	725
165	699
166	1575
167	2357
168	1366
169	926
170	1038
171	442
172	458
173	579
174	1870
175	1022
176	2293
177	4315
178	872
179	659
180	2530
181	519
182	2037
183	1924
184	1088
185	2731
186	1826
187	1714
188	2485
189	1339
190	688
191	1078
192	1889
193	3155
194	1478
195	591
196	1252
197	628
198	2245
199	964
200	1040
201	3170
202	3963
203	1983
204	4227
205	3285
206	534
207	2386
208	700
209	1808
210	757
211	807
212	586
213	624
214	1538
215	1048
216	496
217	1100
218	1366
219	1128
220	2121
221	2033
222	1546
223	913
224	3536
225	810
226	895
227	716
228	1240
229	2470
230	2082
231	505
232	914
233	1720
234	1054
235	1521
236	1960
237	1170
238	1159
239	2970
240	2525
241	2207
242	1324
243	1118
244	1541
245	925
246	1804
247	820
248	4286
249	2175
250	1510
251	2162
252	681
253	1278
254	4679
255	1799
256	2536
257	1612
258	1727
259	2897
260	683
261	1019
262	2865
263	657
264	756
265	2492
266	835
267	1054
268	2509
269	952
270	1030
271	3806
272	726
273	1659
274	2699
275	1298
276	2564
277	808
278	1741
279	2790
280	2988
281	1259
282	1840
283	2805
284	2978
285	2636
286	1291
287	2252
288	4165
289	1107
290	1108
291	1651
292	1297
293	2396
294	1623
295	2875
296	1035
297	896
298	1809
299	1397
300	3547
301	749
302	1105
303	4465
304	3646
305	1698
306	1265
307	2323
308	4574
309	804
310	698
311	3549
312	1187
313	1193
314	880
315	684
316	1058
317	5065
318	1778
319	1796
320	1652
321	2177
322	958
323	796
324	3018
325	1596
326	3345
327	854
328	1008
329	3178
330	1484
331	561
332	1365
333	2674
334	1310
335	1289
336	2304
337	617
338	614
339	775
340	635
341	853
342	1802
343	3000
344	2670
345	2537
346	1545
347	677
348	672
349	1730
350	1610
351	1076
352	1489
353	1938
354	3575
355	1342
356	1399
357	2160
358	1459
359	2838
360	1461
361	1155
362	4170
363	1973
364	1121
365	1697
366	3069
367	2259
368	1883
369	1018
370	3996
371	1545
372	1051
373	1818
374	2435
375	5015
376	3102
377	4089
378	2213
379	802
380	1575
381	962
382	1081
383	1443
384	448
385	1701
386	2006
387	938
388	451
389	1961
390	1079
391	2224
392	872
393	1158
394	2926
395	3487
396	1894
397	744
398	1027
399	5894
400	2107
401	3090
402	3010
403	2976
404	1572
405	850
406	2488
407	2090
408	1848
409	1133
410	1484
411	1937
412	2579
413	1148
414	1531
415	689
416	4641
417	4564
418	2683
419	1747
420	810
421	3776
422	1456
423	601
424	751
425	2740
426	1352
427	709
428	897
429	607
430	701
431	1101
432	1785
433	1281
434	3927
435	2118
436	1984
437	2710
438	908
439	591
440	2032
441	1017
442	1363
443	587
444	752
445	890
446	1509
447	1079
448	687
449	979
450	449
451	1616
452	1223
453	1248
454	930
455	1461
456	368
457	158
458	321
459	746
460	384
461	452
462	259
463	252
464	380
465	95
466	164
467	1066
468	358
469	216
470	560
471	2678
472	323
473	593
474	512
475	2745
476	621
477	378
478	922
479	359
480	2946
481	634
482	718
483	575
484	3693
485	991
486	534
487	537
488	305
489	526
490	430
491	569
492	641
493	386
494	711
495	399
496	388
497	452
498	1889
499	1359
500	467
501	2954
502	552
503	300
504	1629
505	567
506	470
507	449
508	1028
509	702
510	707
511	188
512	840
513	1005
514	1082
515	1049
516	508
517	565
518	1611
519	964
520	511
521	895
522	652
523	686
524	363
525	201
526	355
527	760
528	760
529	312
530	242
531	1051
532	735
533	603
534	716
535	453
536	691
537	2311
538	418
539	976
540	419
541	458
542	297
543	210
544	750
545	355
546	522
547	1725
548	992
549	608
550	614
551	1221
552	630
553	397
1	477
2	680
3	932
4	1222
5	670
6	622
7	799
8	742
9	925
10	630
11	416
12	738
13	1137
14	784
15	651
16	1238
17	1014
18	668
19	895
20	1473
21	834
22	764
23	1221
24	920
25	1744
26	996
27	1049
28	1097
29	1151
30	967
31	583
32	950
33	1697
34	565
35	744
36	1631
37	674
38	576
39	1372
40	629
41	786
42	1686
43	834
44	474
45	1682
46	1421
47	444
48	1446
49	859
50	2125
51	886
52	744
53	957
54	667
55	1434
56	1551
57	613
58	428
59	742
60	736
61	2368
62	1234
63	1577
64	582
65	1889
66	1800
67	1098
68	731
69	1992
70	1852
71	698
72	959
73	903
74	900
75	1121
76	590
77	623
78	897
79	900
80	728
81	1257
82	747
83	586
84	1734
85	1425
86	563
87	1027
88	619
89	841
90	1333
91	884
92	543
93	1040
94	1269
95	2907
96	2547
97	817
98	557
99	2411
100	610
101	761
102	1421
103	857
104	1082
105	452
106	709
107	729
108	518
109	576
110	723
111	777
112	726
113	1072
114	1073
115	1194
116	1278
117	1007
118	1875
119	900
120	1209
121	448
122	1117
123	1096
124	1640
125	823
126	2232
127	1627
128	1475
129	636
130	1044
131	665
132	1812
133	1104
134	761
135	1622
136	935
137	557
138	938
139	758
140	522
141	1246
142	3781
143	575
144	1151
145	545
146	2722
147	1217
148	1506
149	736
150	519
151	616
152	1175
153	1715
154	2483
155	1109
156	1020
157	1472
158	1888
159	434
160	1694
161	887
162	1456
163	1352
164	887
165	1952
166	622
167	1934
168	1072
169	1448
170	1350
171	2061
172	618
173	1195
174	2887
175	829
176	574
177	1615
178	2901
179	643
180	815
181	1367
182	1788
183	569
184	1479
185	890
186	1347
187	1323
188	2449
189	1322
190	1308
191	794
192	939
193	1973
194	1063
195	849
196	1083
197	1483
198	649
199	1351
200	2346
201	1047
202	1507
203	3047
204	1161
205	723
206	2312
207	1415
208	632
209	830
210	956
211	1105
212	2226
213	2696
214	916
215	782
216	1036
217	1603
218	606
219	695
220	869
221	941
222	809
223	2792
224	715
225	1183
226	1226
227	1433
228	657
229	993
230	3038
231	506
232	665
233	2153
234	1309
235	1963
236	730
237	836
238	2176
239	2125
240	415
241	810
242	2001
243	1046
244	518
245	1152
246	694
247	1090
248	1055
249	1114
250	2555
251	1928
252	1992
253	818
254	2813
255	1777
256	1823
257	1183
258	755
259	1578
260	1030
261	2792
262	2684
263	749
264	2680
265	1827
266	909
267	807
268	1848
269	498
270	1320
271	680
272	1728
273	617
274	1364
275	692
276	963
277	3173
278	2595
279	548
280	1080
281	682
282	905
283	516
284	1421
285	923
286	968
287	966
288	1117
289	1779
290	810
291	3353
292	2188
293	941
294	1771
295	957
296	2887
297	1298
298	2651
299	2345
300	801
301	2576
302	2523
303	1410
304	494
305	1965
306	736
307	1089
308	717
309	1721
310	1371
311	2919
312	2772
313	2234
314	1546
315	1053
316	1124
317	1423
318	513
319	1365
320	832
321	1075
322	1610
323	2293
324	1243
325	2262
326	2586
327	3129
328	1572
329	2055
330	1259
331	635
332	1132
333	2570
334	2764
335	2483
336	1361
337	947
338	1601
339	509
340	1514
341	1098
342	3266
343	1098
344	654
345	1299
346	1108
347	708
348	1814
349	642
350	1504
351	3547
352	1017
353	1797
354	1152
355	1703
356	1507
357	2269
358	4108
359	2639
360	2470
361	2729
362	1218
363	1916
364	586
365	732
366	946
367	1246
368	1271
369	1721
370	664
371	1105
372	1845
373	2067
374	1684
375	3652
376	845
377	1296
378	1972
379	1750
380	957
381	2164
382	715
383	1769
384	1017
385	970
386	726
387	945
388	1045
389	1164
390	1558
391	859
392	2333
393	1284
394	575
395	898
396	1472
397	1546
398	653
399	3683
400	478
401	1616
402	836
403	946
404	614
405	936
406	2328
407	2129
408	738
409	2892
410	2690
411	1053
412	2726
413	2819
414	925
415	1104
416	1595
417	1039
418	1884
419	1097
420	1407
421	1751
422	919
423	1048
424	1833
425	1221
426	1940
427	2237
428	496
429	996
430	2974
431	2745
432	2494
433	2655
434	534
435	736
436	3327
437	1849
438	2422
439	2008
440	583
441	698
442	549
443	2273
444	1752
445	804
446	1055
447	875
448	1371
449	2473
450	450
451	2476
452	1183
453	874
454	1067
455	820
456	998
457	766
458	1897
459	2416
460	1850
461	972
462	2497
463	1396
464	2494
465	1824
466	550
467	1249
468	1538
469	547
470	879
471	1787
472	1990
473	713
474	848
475	820
476	1792
477	1199
478	961
479	695
480	3610
481	748
482	867
483	1947
484	541
485	1087
486	1663
487	833
488	1317
489	1280
490	681
491	2659
492	664
493	1380
494	958
495	4298
496	1319
497	541
498	1169
499	878
500	1908
501	1193
502	894
503	2345
504	1268
505	481
506	635
507	1890
508	1728
509	537
510	1776
511	1376
512	2257
513	1361
514	3058
515	644
516	918
517	1362
518	760
519	469
520	1192
521	2175
522	2614
523	1258
524	790
525	1501
526	980
527	889
528	1105
529	2562
530	1729
531	1604
532	3723
533	1346
534	4363
535	445
536	524
537	2216
538	2510
539	2818
540	2280
541	1015
542	1243
543	3024
544	2309
545	2551
546	1176
547	1315
548	3417
549	740
550	3123
551	2894
552	639
553	924
554	2598
555	1073
556	1886
557	2658
558	1305
559	1789
560	1024
561	991
562	2386
563	1036
564	1048
565	633
566	670
567	1332
568	687
569	478
570	865
571	687
572	908
573	121
574	725
575	572
576	3828
577	620
578	459
579	1132
580	532
581	626
582	587
583	1439
584	676
585	731
586	407
587	598
588	1889
589	418
590	307
591	777
592	304
593	224
594	372
595	451
596	478
597	458
598	500
599	823
600	485
601	271
602	104
603	311
604	402
605	740
606	467
607	287
608	402
609	870
610	507
611	208
612	455
613	606
614	162
615	710
616	598
617	452
618	138
619	369
620	473
621	857
622	438
623	514
624	362
625	372
626	266
627	796
628	442
629	611
630	228
631	279
632	311
633	900
634	294
635	486
636	421
637	782
638	401
639	444
640	259
641	880
642	222
643	2104
644	140
645	188
646	760
647	592
648	812
649	879
650	939
651	2616
652	562
653	526
654	321
655	543
656	189
657	415
658	510
659	405
660	154
661	525
662	432
663	875
664	608
665	254
666	523
667	2376
668	328
669	926
670	452
671	276
1	1856
2	2501
3	576
4	1375
5	2559
6	2068
7	652
8	669
9	2393
10	957
11	2264
12	1086
13	790
14	1725
15	4148
16	1275
17	1258
18	2663
19	2245
20	671
21	2215
22	1416
23	1722
24	505
25	1347
26	1287
27	1532
28	1160
29	1440
30	1829
31	813
32	675
33	1262
34	1209
35	1357
36	1549
37	1930
38	2133
39	1097
40	2806
41	3077
42	1140
43	1180
44	1078
45	540
46	783
47	1270
48	731
49	535
50	1167
51	1269
52	528
53	709
54	1341
55	553
56	1161
57	2639
58	1063
59	1344
60	1372
61	1963
62	749
63	1101
64	771
65	902
66	1843
67	1146
68	622
69	979
70	1389
71	1175
72	984
73	492
74	940
75	673
76	1554
77	1666
78	1354
79	477
80	881
81	711
82	1023
83	531
84	1759
85	825
86	1209
87	638
88	1916
89	602
90	569
91	2433
92	744
93	1561
94	1072
95	643
96	564
97	555
98	1828
99	567
100	1271
101	1137
102	708
103	1141
104	1026
105	706
106	2082
107	1680
108	722
109	606
110	1782
111	1245
112	1289
113	758
114	799
115	673
116	1289
117	996
118	939
119	1438
120	865
121	697
122	870
123	898
124	1117
125	652
126	1254
127	974
128	1063
129	2140
130	621
131	1450
132	528
133	1072
134	738
135	1341
136	925
137	1695
138	1402
139	627
140	1238
141	1079
142	467
143	1310
144	1408
145	985
146	655
147	1301
148	882
149	829
150	1144
151	1039
152	603
153	615
154	1151
155	1588
156	611
157	1670
158	2480
159	593
160	1162
161	750
162	2170
163	534
164	3067
165	2489
166	856
167	1079
168	1437
169	538
170	558
171	732
172	581
173	957
174	1164
175	422
176	1168
177	699
178	798
179	1600
180	1717
181	657
182	813
183	703
184	1801
185	898
186	728
187	1155
188	813
189	1144
190	1498
191	583
192	998
193	1022
194	676
195	1655
196	891
197	985
198	886
199	593
200	1627
201	593
202	1344
203	1025
204	596
205	1494
206	1086
207	538
208	944
209	889
210	846
211	1397
212	517
213	680
214	1367
215	662
216	995
217	2364
218	932
219	765
220	526
221	914
222	3769
223	540
224	673
225	1425
226	733
227	451
228	2109
229	824
230	1581
231	902
232	1258
233	3722
234	828
235	1512
236	1004
237	1691
238	833
239	496
240	1747
241	1122
242	1194
243	2316
244	1516
245	638
246	895
247	851
248	1155
249	476
250	450
251	1313
252	817
253	438
254	1513
255	751
256	984
257	811
258	2380
259	638
260	553
261	1618
262	3088
263	1205
264	1154
265	1488
266	1763
267	1336
268	1333
269	1320
270	1015
271	1250
272	1238
273	1516
274	708
275	1539
276	640
277	1668
278	1678
279	1586
280	700
281	790
282	1968
283	1191
284	2196
285	1888
286	1382
287	1628
288	2240
289	802
290	641
291	1839
292	966
293	1354
294	1183
295	1386
296	1720
297	2315
298	835
299	1718
300	876
301	1272
302	432
303	1683
304	2285
305	1625
306	808
307	993
308	1466
309	1861
310	763
311	2290
312	2054
313	2379
314	2494
315	954
316	2296
317	2181
318	1358
319	2335
320	1609
321	1775
322	3061
323	2754
324	2428
325	2099
326	2615
327	1229
328	1709
329	1742
330	577
331	1289
332	498
333	859
334	649
335	1441
336	1720
337	1223
338	1526
339	921
340	913
341	1653
342	828
343	1671
344	2208
345	2183
346	3292
347	1842
348	1432
349	2570
350	902
351	1081
352	1787
353	1103
354	1893
355	2895
356	1412
357	1762
358	1167
359	840
360	2564
361	799
362	668
363	2384
364	4003
365	1146
366	2600
367	3049
368	3189
369	971
370	1808
371	1972
372	1185
373	1683
374	3014
375	1217
376	1233
377	710
378	2009
379	2614
380	2934
381	2488
382	2361
383	2342
384	1157
385	2166
386	2860
387	2047
388	803
389	1943
390	1839
391	707
392	2028
393	2317
394	1099
395	2526
396	1219
397	1967
398	2112
399	909
400	1797
401	1266
402	1930
403	1947
404	1377
405	2179
406	1252
407	1103
408	591
409	2624
410	1449
411	1385
412	801
413	1448
414	1195
415	1239
416	1357
417	3370
418	1820
419	1055
420	956
421	1209
422	1492
423	3030
424	1836
425	1128
426	1559
427	793
428	1989
429	811
430	1000
431	1267
432	727
433	856
434	1811
435	1969
436	2910
437	2597
438	1477
439	527
440	1628
441	1145
442	621
443	3037
444	1063
445	2015
446	2077
447	758
448	763
449	2412
450	1463
451	4322
452	1629
453	1715
454	1548
455	1503
456	1150
457	1692
458	1454
459	1764
460	602
461	1361
462	1182
463	613
464	3239
465	602
466	1380
467	1693
468	1043
469	1639
470	521
471	488
472	1933
473	1428
474	2319
475	1698
476	1186
477	1803
478	790
479	715
480	1948
481	954
482	669
483	658
484	591
485	447
486	687
487	641
488	455
489	624
490	789
491	537
492	228
493	668
494	698
495	660
496	2535
497	2573
498	301
499	696
500	178
501	976
502	545
503	1263
504	671
505	329
506	494
507	378
508	528
509	556
510	1006
511	351
512	1086
513	907
514	1835
515	401
516	316
517	246
518	1916
519	3713
520	1420
521	2831
522	3918
523	3115
524	1224
525	1529
526	1284
1	206
2	392
3	2038
4	1072
5	1009
6	1041
7	1452
8	2076
9	3462
10	1476
11	3036
12	420
13	797
14	530
15	273
16	319
17	1466
18	885
19	2981
20	1225
21	960
22	1049
23	785
24	701
25	559
26	469
27	1051
28	1445
29	272
30	255
31	583
32	2367
33	965
34	738
35	607
36	730
37	3195
38	1319
39	977
40	905
41	2574
42	2216
43	1319
44	3398
45	1032
46	640
47	347
48	1753
49	1960
50	1684
51	1537
52	839
53	1668
54	941
55	290
56	433
57	2009
58	869
59	3663
60	2108
61	3219
62	1007
63	3075
64	470
65	1090
66	1187
67	2196
68	1801
69	633
70	1348
71	2001
72	885
73	385
74	776
75	1334
76	3641
77	1655
78	1780
79	1747
80	991
81	645
82	1524
83	2276
84	536
85	2376
86	1359
87	349
88	2740
89	2085
90	1116
91	3999
92	2131
93	2468
94	2695
95	1735
96	1505
97	1968
98	2004
99	1065
100	537
101	568
102	962
103	1259
104	2381
105	859
106	354
107	1169
108	1874
109	1401
110	1879
111	144
112	3114
113	3830
114	1332
115	1768
116	973
117	883
118	1150
119	387
120	676
121	605
122	341
123	3220
124	1662
125	1614
126	981
127	146
128	675
129	478
130	3174
131	1396
132	159
133	449
134	3435
135	875
136	1914
137	2890
138	916
139	416
140	1600
141	171
142	1710
143	1214
144	856
145	269
146	1120
147	1231
148	1605
149	1105
150	1777
151	1710
152	648
153	988
154	1147
155	1423
156	1049
157	2483
158	877
159	1859
160	627
161	1136
162	2276
163	1507
164	491
165	2031
166	2700
167	3398
168	2188
169	1834
170	1173
171	1286
172	3097
173	711
174	2316
175	1829
176	1099
177	784
178	4968
179	1167
180	766
181	834
182	123
183	1942
184	1771
185	1341
186	2162
187	1441
188	3105
189	2063
190	1382
191	1156
192	1880
193	2047
194	1936
195	2432
196	2300
197	2422
198	1584
199	1229
200	2468
201	2899
202	1620
203	2577
204	1889
205	2733
206	2477
207	992
208	2797
209	1432
210	1923
211	2282
212	1669
213	2126
214	1374
215	1550
216	1210
217	1998
218	709
219	1005
220	445
221	815
222	1576
223	654
224	463
225	2660
1	2237
2	1135
3	1398
4	1245
5	995
6	940
7	1968
8	1162
9	2063
10	1268
11	2309
12	1340
13	2080
14	429
15	891
16	1935
17	2377
18	1704
19	3333
20	3502
21	2887
22	1821
23	2347
[truncated: 170 more rows]

## Sheet: Ctrl 3
Control 3	Injury and 40d regeneration
	Cross sectional Area
1	1155
2	4681
3	1589
4	2942
5	1152
6	5379
7	3252
8	3320
9	5669
10	4873
11	903
12	2948
13	3115
14	1790
15	1922
16	3698
17	2568
18	3189
19	2238
20	4360
21	1845
22	3396
23	3454
24	4932
25	2118
26	1658
27	1727
28	2437
29	2769
30	2084
31	2061
32	696
33	2209
34	3266
35	2656
36	1653
37	2598
38	3155
39	2480
40	2474
41	2731
42	2146
43	4084
44	2967
45	582
46	2815
47	4817
48	1837
49	1352
50	2593
51	3675
52	4454
53	4156
54	2971
55	1852
56	1773
57	2717
58	2419
59	880
60	3402
61	2341
62	907
63	2813
64	3411
65	2782
66	3307
67	2591
68	2431
69	1874
70	4389
71	1260
72	1115
73	4121
74	3448
75	2442
76	4182
77	3323
78	758
79	1014
80	3079
81	1670
82	1544
83	818
84	2180
85	2222
86	1604
87	2908
88	4306
89	3093
90	4120
91	3403
92	720
93	2244
94	2570
95	946
96	1771
97	2069
98	2767
99	3631
100	1726
101	2922
102	1268
103	1417
104	1564
105	690
106	955
107	3294
108	2996
109	595
110	3203
111	1343
112	3995
113	863
114	886
115	917
116	3039
117	6195
118	3472
119	733
120	797
121	2791
122	1270
123	860
124	1103
125	3060
126	1359
127	491
128	3823
129	1202
130	778
131	981
132	1196
133	591
134	513
135	1972
136	1118
137	2886
138	2297
139	3531
140	1398
141	864
142	3187
143	1010
144	1351
145	872
146	4173
147	1369
148	2105
149	725
150	1033
151	2257
152	1882
153	1297
154	1410
155	764
156	582
157	940
158	518
159	750
160	3292
161	1689
162	1140
163	3146
164	1170
165	1134
166	1030
167	1190
168	838
169	917
170	628
171	3779
172	597
173	697
174	4084
175	690
176	2380
177	1086
178	919
179	788
180	740
181	1904
182	2271
183	1656
184	1386
185	3789
186	596
187	607
188	951
189	873
190	821
191	1140
192	523
193	1877
194	955
195	3931
196	726
197	3055
198	703
199	568
200	1474
201	2076
202	772
203	675
204	914
205	1045
206	1025
207	2461
208	1870
209	2015
210	1560
211	1253
212	874
213	831
214	2434
215	1865
216	1579
217	984
218	967
219	539
220	1618
221	1020
222	1685
223	963
224	601
225	2866
226	620
227	2574
228	2054
229	2051
230	1205
231	1336
232	1781
233	1879
234	1205
235	946
236	1762
237	496
238	578
239	2545
240	1052
241	2361
242	672
243	1357
244	803
245	1345
246	878
247	1090
248	1314
249	1163
250	2063
251	1678
252	1491
253	3576
254	1198
255	868
256	2357
257	1638
258	605
259	940
260	894
261	1760
262	742
263	1804
264	1379
265	3955
266	1617
267	2175
268	722
269	620
270	603
271	717
272	1987
273	1184
274	691
275	2562
276	1346
277	910
278	764
279	4409
280	727
281	1191
282	1059
283	3909
284	1079
285	1216
286	1076
287	1564
288	1039
289	1414
290	1143
291	1574
292	1345
293	1736
294	2095
295	899
296	3274
297	2747
298	2655
299	3204
300	2052
301	3205
302	1213
303	995
304	816
305	1572
306	1112
307	1025
308	912
309	1368
310	575
311	2339
312	1093
313	3031
314	920
315	1336
316	4284
317	3905
318	3608
319	1297
320	923
321	425
322	3397
323	1292
324	660
325	1537
326	6179
327	560
328	1431
329	911
330	2619
331	5257
332	867
333	2371
334	921
335	1576
336	780
337	1875
338	1241
339	691
340	953
341	946
342	2221
343	1800
344	815
345	1538
346	1093
347	2725
348	2352
349	713
350	1224
351	681
352	1933
353	2412
354	1739
355	1037
356	1210
357	2119
358	1553
359	900
360	921
361	687
362	718
363	764
364	894
365	518
366	503
367	311
368	289
369	592
370	181
371	525
372	936
373	246
374	173
375	347
376	218
377	333
378	425
379	412
380	254
381	188
382	495
383	464
384	77
385	422
386	285
387	221
388	354
389	445
390	885
391	417
392	635
393	379
394	201
395	979
396	286
397	1120
398	300
399	232
400	700
401	493
402	476
403	461
404	324
405	344
406	834
407	327
408	324
409	441
410	322
411	476
412	360
413	209
414	194
415	504
416	298
417	179
418	831
419	231
420	321
421	454
422	759
423	754
424	366
425	291
426	328
427	294
428	511
429	1440
430	265
431	2597
432	1147
433	167
434	424
435	214
436	193
437	304
438	568
439	667
440	367
441	235
442	1036
443	137
444	185
445	246
446	280
447	217
448	302
449	2073
450	1428
451	334
452	303
453	213
454	194
455	384
456	411
457	472
458	368
459	336
460	199
461	353
462	438
463	797
464	199
465	201
466	134
467	286
468	375
469	204
1	943
2	653
3	713
4	1772
5	954
6	3426
7	690
8	992
9	2976
10	4976
11	2471
12	4473
13	1620
14	3359
15	838
16	1596
17	537
18	2536
19	1083
20	3825
21	2284
22	3098
23	1451
24	930
25	2868
26	5056
27	3164
28	1015
29	4603
30	1880
31	1819
32	3005
33	3598
34	4626
35	2973
36	1291
37	2090
38	2218
39	2644
40	5012
41	2567
42	1990
43	2756
44	5362
45	2377
46	847
47	2159
48	3228
49	3642
50	1807
51	3003
52	2987
53	1756
54	3921
55	2954
56	4502
57	4758
58	1112
59	3292
60	3883
61	1220
62	4126
63	3412
64	3571
65	1248
66	567
67	3428
68	563
69	2954
70	2820
71	3389
72	1963
73	2509
74	1614
75	5784
76	3542
77	1633
78	4572
79	4306
80	1874
81	1371
82	543
83	748
84	3338
85	1708
86	2988
87	3522
88	3790
89	4424
90	3704
91	2507
92	2620
93	2883
94	2673
95	4974
96	1294
97	1303
98	2760
99	4184
100	3305
101	3083
102	3989
103	2522
104	2000
105	1497
106	2863
107	1923
108	4338
109	4113
110	3107
111	1226
112	1832
113	2150
114	4231
115	3681
116	1053
117	3067
118	1265
119	4926
120	1829
121	4821
122	2089
123	4352
124	2292
125	950
126	3997
127	2165
128	3591
129	3375
130	2384
131	5666
132	747
133	1292
134	3405
135	845
136	1469
137	1393
138	1850
139	2975
140	1984
141	3577
142	5288
143	620
144	1183
145	2687
146	2009
147	2808
148	2535
149	693
150	2696
151	2693
152	812
153	4149
154	2059
155	4443
156	3232
157	1037
158	2535
159	2602
160	1919
161	1843
162	1477
163	3245
164	1122
165	4253
166	5202
167	2429
168	2991
169	1782
170	2050
171	2460
172	1285
173	2315
174	2832
175	2117
176	3362
177	2918
178	1286
179	3211
180	2835
181	618
182	2024
183	2031
184	928
185	2394
186	2808
187	2488
188	3636
189	3924
190	2508
191	1203
192	2636
193	2494
194	2373
195	1456
196	3248
197	3260
198	1589
199	1402
200	584
201	3010
202	2407
203	3027
204	1546
205	774
206	681
207	3720
208	2885
209	1464
210	1216
211	1657
212	3401
213	811
214	699
215	1230
216	1997
217	1317
218	2501
219	928
220	818
221	3660
222	1761
223	2590
224	1829
225	2230
226	1080
227	1281
228	2027
229	2537
230	1373
231	2362
232	3473
233	2636
234	2100
235	3402
236	3630
237	2223
238	1619
239	591
240	1734
241	2249
242	1014
243	3930
244	1920
245	3181
246	2194
247	990
248	2983
249	2339
250	3843
251	3843
252	1543
253	739
254	1852
255	2429
256	728
257	2228
258	1657
259	785
260	1630
261	3076
262	1248
263	3606
264	3014
265	2109
266	1371
267	1338
268	1682
269	930
270	3737
271	2349
272	1131
273	1731
274	921
275	664
276	1289
277	2354
278	1379
279	1213
280	1304
281	974
282	1743
283	784
284	1918
285	2450
286	1419
287	1649
288	946
289	1465
290	2070
291	1600
292	2404
293	416
294	2733
295	1182
296	434
297	726
298	1049
299	1187
300	1146
301	951
302	576
303	1234
304	1048
305	1260
306	1355
307	1251
308	1247
309	1188
310	788
311	2205
312	1728
313	1457
314	897
315	1006
316	1063
317	1879
318	1634
319	1514
320	1546
321	1244
322	1156
323	1129
324	2774
325	490
326	1559
327	1152
328	2926
329	650
330	1268
331	1728
332	1611
333	1681
334	1183
335	1519
336	1022
337	2753
338	1979
339	2068
340	1744
341	805
342	1896
343	1855
344	1398
345	1082
346	2034
347	963
348	1676
349	2221
350	1488
351	716
352	1867
353	1586
354	930
355	1363
356	1372
357	1038
358	1489
359	1802
360	864
361	1375
362	2447
363	1378
364	1610
365	1479
366	2452
367	1126
368	1682
369	1081
370	1843
371	1225
372	1444
373	2359
374	991
375	663
376	2152
377	2606
378	1339
379	2282
380	1247
381	767
382	683
383	2132
384	767
385	1201
386	1170
387	971
388	2756
389	1158
390	1451
391	600
392	690
393	484
394	1614
395	1124
396	992
397	1321
398	1956
399	859
400	1278
401	1703
402	1696
403	2361
404	1278
405	3257
406	1294
407	1028
408	1897
409	2005
410	2761
411	1033
412	1666
413	1147
414	1176
415	2323
416	1689
417	1572
418	624
419	1528
420	725
421	708
422	606
423	868
424	1231
425	150
426	323
427	354
428	458
429	596
430	1644
431	210
432	199
433	269
434	485
435	493
436	560
437	602
438	152
439	240
440	196
441	445
442	172
443	459
444	554
445	2654
446	291
447	356
448	5185
449	423
450	200
451	5060
452	502
453	409
454	2174
455	558
456	400
457	753
458	118
459	304
460	313
461	354
462	3420
463	185
1	657
2	1155
3	2079
4	1826
5	1998
6	1430
7	1674
8	3621
9	4033
10	1556
11	2867
12	3641
13	1784
14	4967
15	1126
16	2626
17	4240
18	1089
19	1782
20	6179
21	2230
22	4588
23	1987
24	4310
25	4133
26	665
27	3416
28	4163
29	3495
30	2528
31	2886
32	2473
33	2154
34	1763
35	2997
36	4034
37	779
38	3611
39	1199
40	2050
41	4307
42	1836
43	3463
44	3954
45	2697
46	3980
47	1453
48	3844
49	2162
50	2609
51	2974
52	3419
53	1874
54	1429
55	3288
56	892
57	4380
58	997
59	2741
60	2506
61	859
62	2869
63	2083
64	1125
65	426
66	949
67	3046
68	2046
69	1064
70	1424
71	2105
72	3268
73	2943
74	2162
75	1417
76	2668
77	3800
78	995
79	1393
80	3764
81	3323
82	2114
83	2753
84	687
85	2359
86	3539
87	3424
88	1678
89	2698
90	3672
91	4567
92	3197
93	2576
94	1650
95	2049
96	3404
97	928
98	3875
99	5592
100	2902
101	4210
102	4249
103	705
104	1938
105	2162
106	3608
107	1765
108	1821
109	1275
110	3188
111	3218
112	1066
113	3610
114	2854
115	4202
116	3215
117	4890
118	4064
119	1759
120	2419
121	1419
122	3566
123	3277
124	3465
125	1867
126	1641
127	2241
128	1600
129	4733
130	2701
131	2305
132	1725
133	2396
134	1109
135	3392
136	865
137	5334
138	3426
139	4409
140	1328
141	1545
142	2548
143	1660
144	1258
145	3784
146	1778
147	1888
148	3275
149	2380
150	3162
151	1965
152	2614
153	547
154	4408
155	819
156	2660
157	3740
158	3268
159	2677
160	2673
161	4750
162	3723
163	1119
164	1417
165	432
166	405
167	436
168	520
169	1674
170	2734
171	2162
172	613
173	1146
174	401
175	297
176	4254
177	1795
178	95
179	284
180	468
181	480
182	278
183	1224
184	2732
185	1703
186	355
187	184
188	3892
189	359
190	646
191	231
192	245
193	2994
194	299
195	2053
196	1484
197	2029
1	2876
2	2089
3	3112
4	1960
5	2730
6	1115
7	2488
8	1286
9	687
10	2591
11	2571
12	2488
13	1900
14	771
15	714
16	914
17	1064
18	1023
19	1954
20	1529
21	506
22	458
23	2043
24	193
25	452
26	473
27	314
28	554
29	226
30	346
31	2309
32	1352
33	3455
34	2068
35	2096
36	2555
37	2770
38	2245
39	2667
40	2527
41	2111
42	861
43	2599
44	674
45	1049
46	750
47	1816
48	444
49	722
50	324
51	1003
52	1082
53	138
54	227
55	617
56	806
57	1235
58	319
59	591
60	539
61	1384
62	1536
63	1213
64	2924
65	1435
66	225
67	1300
68	2120
69	1601
70	1381
71	888
72	2273
73	490
74	1982
75	1452
76	1906
77	1172
78	1620
79	1268
80	2138
81	788
82	940
83	428
84	362
85	1066
86	631
87	773
88	746
89	158
90	660
91	934
92	508
93	152
94	1701
95	778
96	2463
97	423
98	225
99	244
100	192
101	967
102	540
103	646
104	646
105	176
106	107
107	576
108	213
109	462
110	383
111	568
112	3127
113	352
114	211
115	380
116	226
117	2996
118	491
119	905
120	1154
121	1580
122	2413
123	1615
124	1683
125	403
126	1491
127	3078
128	957
129	1628
130	2385
131	1873
132	890
133	1807
134	642
135	741
136	1103
137	285
138	377
139	1185
140	1637
141	1495
142	1368
143	373
144	1253
145	1224
146	972
147	1332
148	756
149	1203
150	2120
151	3033
152	422
153	1022
154	2722
155	1142
156	1135
157	630
158	478
159	272
160	181
161	1841
162	2141
163	244
164	392
165	1732
166	2959
167	2901
168	882
169	417
170	537
171	701
172	260
173	540
174	1162
175	322
176	1405
177	3466
178	1355
179	1858
180	549
181	1420
182	412
183	764
184	818
185	921
186	1818
187	1377
188	751
189	232
190	306
191	1137
192	319
193	638
194	330
195	1068
196	1060
197	1148
198	2529
199	1003
200	1502
201	1353
202	509
203	778
204	649
205	502
206	1046
207	1371
208	1269
209	1894
210	1680
211	1657
212	1186
213	905
214	870
215	1976
216	1482
217	634
218	853
219	950
220	2656
221	375
222	842
223	270
224	849
225	1148
226	1296
227	758
228	720
229	452
230	451
231	382
232	657
233	907
1	829
2	447
3	600
4	1029
5	405
6	1251
7	426
8	1232
9	1277
10	750
11	711
12	1562
13	1267
14	1242
15	1280
16	651
17	648
18	1040
19	695
20	1158
21	1146
22	440
23	1775
24	1956
25	726
26	2143
27	2460
28	621
29	704
30	500
31	872
32	1462
33	2164
34	1766
35	2368
36	2706
37	2030
38	3233
39	1484
40	1321
41	1175
42	2025
43	2603
44	1273
45	1886
46	1594
47	418
48	451
49	346
50	666
51	1271
52	982
53	1407
54	1259
55	2492
56	2879
57	1281
58	834
59	2552
60	886
61	1596
62	874
63	653
64	575
65	361
66	1209
67	591
68	2102
69	880
70	738
71	766
72	1381
73	1864
74	1038
75	1280
76	468
77	872
78	1832
79	390
80	453
81	597
82	906
83	1197
84	1155
85	537
86	350
87	947
88	764
89	3135
90	306
91	391
92	2527
93	2468
94	3116
95	1186
96	815
97	1388
98	2868
99	2377
100	648
101	1757
102	158
103	351
104	690
105	671
106	851
107	752
108	488
109	882
110	1513
111	1484
112	1655
113	791
114	372
115	737
116	1839
117	1383
118	1533
119	615
120	1137
121	2433
122	3055
123	559
124	1210
125	902
126	911
127	2043
128	2164
129	2790
130	1413
131	1128
132	304
133	140
134	150
135	130
136	442
137	518
138	424
139	1049
140	300
141	1477
142	1597
143	426
144	534
145	332
146	3129
147	2687
148	140
149	84
150	226
151	2170
152	220
153	483
154	216
155	481
156	703
157	1655
158	1423
159	2780
160	1855
161	3347
162	738
163	295
164	322
165	654
166	2203
167	384
168	2391
169	2451
170	1788
171	2668
172	4002
173	1044
174	325
175	1079
176	1792
177	1825
178	3270
179	314
180	352
181	288
182	2099
183	1118
184	2800
185	1520
186	1973
187	685
188	3020
189	232
190	264
191	275
192	240
193	646
194	2385
195	1319
196	907
197	375
198	2129
199	276
200	396
201	276
202	1742
203	581
204	614
205	1765
206	1823
207	1698
208	1727
209	693
210	841
211	2363
212	1873
213	1192
214	1652
215	891
216	917
217	2213
218	1130
219	736
220	126
221	431
222	339
223	973
224	182
225	321
226	1050
227	437
228	236
229	148
230	215
231	1539
232	3225
233	1627
234	1742
235	2049
236	1158
237	1156
238	685
239	1253
240	795
241	624
242	618
243	2148
244	2235
245	1028
246	354
247	629
248	1352
249	1549
250	547
251	421
252	703
253	301
254	1319
255	729
256	685
257	845
258	505
259	2530
260	560
261	1598
262	287
263	486
264	867
265	1941
266	762
267	412
268	2597
269	432
270	128
271	457
272	1057
273	1267
274	4634
275	1600
276	951
277	3062
278	2047
279	2513
280	1806
281	882
282	1022
283	756
284	2439
285	801
286	437
287	734
288	1389
289	1534
290	430
291	626
292	929
293	460
294	1004
295	496
296	867
297	812
298	1347
299	532
300	499
301	391
302	516
303	1214
304	294
305	2148
306	965
307	593
308	971
309	521
310	976
311	358
312	755
313	410
314	667
315	590
316	992
317	270
318	678
319	226
320	227
321	528
322	174
323	1336
324	403
325	262
326	1387
327	909
328	1044
329	672
330	744
331	708
332	943
333	500
334	651
335	381
336	623
337	1038
338	447
339	728
340	463
341	183
342	254
343	611
344	1515
345	768
346	1334
347	464
348	976
349	987
350	1246
351	1635
352	480
353	588
354	577
355	647
356	574
357	419
358	678
359	1124
360	328
361	547
362	1597
363	395
364	446
365	1171
366	1524
367	879
368	1829
369	1395
370	460
371	836
372	545
373	921
374	1205
375	976
376	1113
377	1394
378	1059
379	755
380	705
381	971
382	905
383	948
384	670
385	2054
386	1047
387	869
388	1079
389	1195
390	729
391	1951
392	2618
393	1048
394	1141
395	884
396	1281
397	771
398	1061
399	423
400	926
401	675
402	474
403	1164
404	3075
405	2005
406	1674
407	420
408	816
409	901
410	1637
411	2331
412	1122
413	1439
414	630
415	1505
416	1427
417	1184
418	667
419	596
420	1028
421	790
422	3101
423	1457
424	1419
425	2678
426	550
427	592
428	717
429	1308
430	587
431	468
432	716
433	458
434	476
435	224
436	1515
437	371
438	553
439	1136
440	2437
441	1134
442	1010
443	333
444	494
445	1035
446	1171
447	850
448	2820
449	2978
450	2713
451	2750
452	2410
453	1649
454	542
455	536
456	1124
457	1253
458	481
459	751
460	1581
461	1578
462	2156
463	636
464	919
465	870
466	637
467	848
468	1001
469	626
470	894
471	638
472	511
473	240
474	1736
475	2996
476	659
477	413
478	542
479	746
480	316
481	358
482	285
483	281
484	696
485	2399
486	627
487	791
1	668
2	632
3	840
4	890
5	520
6	379
7	359
8	321
9	424
10	959
11	826
12	1096
13	378
14	262
15	365
16	758
17	270
18	911
19	1325
20	838
21	1234
22	327
23	485
24	1873
25	412
26	640
27	1848
28	2837
29	1175
30	945
31	748
32	1196
33	2455
34	903
35	160
36	1276
37	2865
38	4128
39	1515
40	1672
41	2187
42	891
43	1105
44	1445
45	343
46	818
47	1151
48	1199
49	2265
50	509
51	1188
52	1069
53	372
54	2922
55	2017
56	1621
57	529
58	419
59	1325
60	1858
61	2082
62	2083
63	3323
64	1333
65	1144
66	2228
67	914
68	403
69	551
70	1420
71	1078
72	422
73	428
74	1309
75	402
76	1292
77	856
78	379
79	1014
80	619
81	1828
82	941
83	471
84	488
85	1381
86	348
87	281
88	258
89	1129
90	1436
91	942
92	772
93	1131
94	346
95	1022
96	1631
97	1031
98	1613
99	618
100	1593
101	864
102	718
103	1170
104	1276
105	1917
106	533
107	345
108	1315
109	2338
110	1431
111	4259
112	4536
113	576
114	910
115	1038
116	535
117	1532
118	1848
119	1976
120	719
121	347
122	2685
123	2938
124	564
125	333
126	2298
127	987
128	668
129	434
130	513
131	1240
132	509
133	998
134	1106
135	1119
136	1840
137	851
138	858
139	3623
140	1699
141	1751
142	1503
143	578
144	529
145	659
146	384
147	572
148	1057
149	1165
[truncated: 338 more rows]

## Sheet: Ctrl 5
Control 5	Injury and 40d regeneration
	Cross sectional Area
1	2510
2	1229
3	784
4	551
5	2716
6	2310
7	1216
8	625
9	502
10	1787
11	1982
12	951
13	853
14	1372
15	608
16	1254
17	775
18	1661
19	1398
20	1248
21	804
22	2004
23	994
24	2472
25	594
26	770
27	1523
28	718
29	1200
30	448
31	1145
32	2813
33	1797
34	1269
35	602
36	1001
37	1371
38	614
39	2457
40	2860
41	992
42	809
43	788
44	2165
45	1507
46	4905
47	3062
48	3439
49	834
50	537
51	705
52	2200
53	2142
54	1587
55	561
56	1949
57	1518
58	1050
59	530
60	682
61	1569
62	1271
63	463
64	891
65	1806
66	673
67	1539
68	3224
69	1570
70	657
71	3004
72	1421
73	962
74	2674
75	905
76	1436
77	1568
78	1456
79	1956
80	2715
81	2562
82	3645
83	451
84	654
85	1928
86	881
87	856
88	1851
89	1109
90	734
91	2538
92	519
93	1677
94	2444
95	2105
96	516
97	795
98	1458
99	2032
100	2598
101	845
102	2109
103	1633
104	706
105	1649
106	1947
107	587
108	972
109	1327
110	3586
111	1293
112	2306
113	1048
114	2363
115	1145
116	2023
117	583
118	1710
119	2667
120	633
121	1971
122	952
123	2197
124	2809
125	1274
126	2960
127	2969
128	2291
129	2355
130	3220
131	2756
132	2200
133	2379
134	2320
135	2998
136	1075
137	939
138	2309
139	1833
140	2517
141	523
142	3174
143	624
144	3294
145	447
146	844
147	2766
148	2977
149	1096
150	4248
151	1752
152	2938
153	2726
154	674
155	3391
156	2832
157	2677
158	3023
159	2052
160	3015
161	2335
162	1937
163	1374
164	3151
165	1933
166	1768
167	3130
168	2729
169	2029
170	2966
171	3298
172	1282
173	1993
174	910
175	2341
176	1041
177	455
178	2175
179	685
180	2151
181	2723
182	2841
183	2487
184	2891
185	1614
186	2820
187	1447
188	1741
189	929
190	2796
191	1832
192	2145
193	1167
194	2040
195	2537
196	2240
197	1998
198	2363
199	3293
200	2491
201	420
202	2246
203	2159
204	2223
205	1516
206	2440
207	2495
208	1543
209	2479
210	2015
211	2753
212	2186
213	1907
214	1036
215	1538
216	2581
217	3518
218	4115
219	2270
220	1819
221	2007
222	2947
223	1935
224	625
225	1219
226	959
227	3458
228	1631
229	589
230	2587
231	2763
232	2987
233	2118
234	1240
235	2273
236	631
237	2942
238	1210
239	647
240	1586
241	679
242	2519
243	964
244	2631
245	2080
246	1915
247	2228
248	2864
249	3268
250	2455
251	1086
252	3549
253	1790
254	3404
255	1638
256	2089
257	2867
258	2770
259	2822
260	1691
261	843
262	2448
263	3266
264	605
265	3365
266	1101
267	2182
268	2647
269	3367
270	2247
271	1229
272	1559
273	1809
274	2856
275	2729
276	2736
277	2970
278	2440
279	1773
280	3653
281	2003
282	4436
283	2547
284	2461
285	1867
286	630
287	2349
288	2391
289	1259
290	3258
291	1655
292	2519
293	3031
294	2243
295	3065
296	3761
297	929
298	1893
299	3774
300	3448
301	794
302	2021
303	1055
304	2458
305	1089
306	1613
307	3865
308	1817
309	2103
310	3010
311	2609
312	3683
313	1246
314	934
315	2061
316	2618
317	2804
318	1088
319	2545
320	1477
321	761
322	1384
323	1782
324	2119
325	2874
326	1154
327	1132
328	1721
329	1486
330	2425
331	2708
332	1910
333	1922
334	2404
335	2386
336	2591
337	3679
338	1632
339	736
340	2973
341	1298
342	696
343	2314
344	1984
345	954
346	2438
347	1672
348	1752
349	2331
350	1892
351	1665
352	1403
353	1559
354	3053
355	1602
356	1920
357	1796
358	1327
359	1887
360	406
361	935
362	1281
363	1645
364	2474
365	273
366	488
367	3048
368	3952
369	3046
370	502
371	294
372	2228
373	2211
374	445
375	442
376	357
377	417
378	656
379	519
380	305
381	603
382	2474
383	393
384	406
385	626
386	431
387	1887
388	2865
389	2909
390	246
1	3600
2	2547
3	3564
4	2357
5	2742
6	782
7	4311
8	3559
9	4399
10	4138
11	2524
12	6828
13	1391
14	4910
15	1914
16	2041
17	1559
18	938
19	582
20	2949
21	690
22	4984
23	3141
24	1145
25	1475
26	4062
27	1521
28	3567
29	1915
30	3130
31	3464
32	2222
33	3117
34	2664
35	2123
36	645
37	938
38	1515
39	1035
40	1094
41	2643
42	4808
43	1563
44	1708
45	1148
46	1886
47	4580
48	950
49	1202
50	2733
51	3119
52	1080
53	2399
54	1350
55	825
56	3887
57	4759
58	3163
59	3150
60	3150
61	1295
62	1938
63	2876
64	1137
65	3049
66	859
67	4785
68	2208
69	507
70	1464
71	1316
72	1154
73	1467
74	3736
75	769
76	840
77	3075
78	1132
79	3698
80	603
81	3170
82	2500
83	2743
84	2804
85	3331
86	1569
87	1685
88	1896
89	4049
90	2179
91	1602
92	4722
93	3139
94	2257
95	4399
96	3439
97	3184
98	2642
99	2707
100	2328
101	2843
102	4199
103	2197
104	4031
105	1062
106	2733
107	3419
108	823
109	902
110	661
111	2058
112	4670
113	2137
114	3247
115	2704
116	3126
117	4976
118	806
119	1773
120	4653
121	953
122	2379
123	2952
124	2889
125	601
126	1712
127	3534
128	2402
129	2228
130	2320
131	3085
132	2195
133	1265
134	1708
135	3952
136	1727
137	1756
138	1540
139	1675
140	3015
141	2620
142	2548
143	1635
144	2273
145	1687
146	3103
147	1614
148	2382
149	4453
150	2733
151	3042
152	2491
153	840
154	3258
155	2453
156	1683
157	1299
158	3110
159	1359
160	2249
161	1849
162	2903
163	3239
164	2227
165	3400
166	814
167	3034
168	1426
169	1497
170	3505
171	1031
172	1649
173	2711
174	3920
175	2755
176	2980
177	2519
178	739
179	2840
180	970
181	1940
182	791
183	970
184	2302
185	2881
186	2462
187	3051
188	1503
189	2614
190	4667
191	1144
192	1240
193	4078
194	3685
195	1683
196	2326
197	1095
198	2541
199	1476
200	1330
201	3587
202	3106
203	2098
204	2615
205	2078
206	1159
207	2112
208	2284
209	3429
210	3137
211	506
212	3606
213	2133
214	3186
215	4484
216	2181
217	2664
218	1911
219	2345
220	738
221	1893
222	2141
223	1421
224	520
225	1530
226	2588
227	1746
228	1313
229	2061
230	2693
231	2302
232	2473
233	569
234	2508
235	2342
236	1140
237	2348
238	1626
239	1213
240	1266
241	4489
242	2334
243	447
244	1288
245	1527
246	2862
247	1499
248	874
249	1404
250	1473
251	2948
252	727
253	2088
254	3087
255	1391
256	741
257	2182
258	2765
259	515
260	1217
261	620
262	1774
263	2454
264	450
265	1769
266	1995
267	1743
268	2418
269	684
270	2389
271	2313
272	1636
273	2464
274	1530
275	1217
276	2716
277	2452
278	594
279	2693
280	2198
281	2696
282	1799
283	1971
284	1289
285	2574
286	1451
287	1183
288	1049
289	1731
290	1512
291	1736
292	1794
293	2498
294	1546
295	1227
296	1552
297	884
298	1002
299	1516
300	1127
301	1334
302	874
303	1396
304	2211
305	1575
306	1921
307	1813
308	2374
309	2026
310	2593
311	2486
312	1725
313	2345
314	693
315	916
316	969
317	1869
318	2086
319	2910
320	3234
321	2534
322	932
323	2479
324	2518
325	4514
326	1944
327	1483
328	1979
329	1645
330	2630
331	718
332	776
333	1292
334	480
335	644
336	2790
337	2002
338	918
339	1551
340	2941
341	2433
342	1219
343	1461
344	1652
345	1843
346	2132
347	2470
348	820
349	732
350	1542
351	2139
352	1754
353	3720
354	1098
355	2183
356	527
357	2427
358	1330
359	1931
360	1607
361	995
362	3448
363	2669
364	635
365	1469
366	2230
367	1769
368	535
369	952
370	1749
371	2133
372	1556
373	1643
374	1983
375	622
376	1991
377	1006
378	1649
379	812
380	834
381	3138
382	2677
383	479
384	309
385	558
386	526
387	1921
388	495
389	1040
1	2208
2	1372
3	366
4	275
5	340
6	304
7	487
8	2908
9	3029
10	1317
11	2660
12	3181
13	3587
14	318
15	2495
16	920
17	946
18	1857
19	1654
20	3364
21	831
22	4141
23	2484
24	3028
25	573
26	3866
27	2735
28	4244
29	3726
30	4937
31	5108
32	1415
33	5846
34	5235
35	2228
36	1374
37	5043
38	5326
39	2067
40	1333
41	1723
42	621
43	1470
44	610
45	3432
46	4212
47	2270
48	4847
49	2268
50	2214
51	2404
52	1025
53	556
54	1200
55	5784
56	4823
57	4464
58	1623
59	3553
60	4118
61	3214
62	4284
63	1434
64	1692
65	2077
66	3197
67	3279
68	2824
69	4619
70	3408
71	4111
72	2705
73	3441
74	4914
75	4098
76	2829
77	1998
78	1327
79	3653
80	1979
81	2489
82	451
83	2192
84	4380
85	1446
86	1066
87	4048
88	1626
89	1213
90	2013
91	1488
92	1793
93	3700
94	3150
95	1544
96	1330
97	1274
98	1623
99	2702
100	2417
101	445
102	643
103	2292
104	2194
105	3200
106	4906
107	3052
108	5070
109	4260
110	2532
111	2866
112	4836
113	3158
114	4902
115	5869
116	4066
117	5294
118	583
119	2619
120	5861
121	2633
122	2615
123	4377
124	848
125	3614
126	2513
127	2766
128	3318
129	423
130	303
131	723
132	630
133	3446
134	640
135	4105
136	2749
137	1849
138	1224
139	1914
140	3638
141	800
142	1806
143	537
144	1372
145	741
146	2607
147	1157
148	2277
149	2160
150	958
151	975
152	1484
153	731
154	2593
155	3010
156	2055
157	1453
158	1682
159	2435
160	3467
161	2581
162	2238
163	2062
164	2228
165	2238
166	1925
167	2143
168	1506
169	3146
170	2496
171	3245
172	1245
173	6014
174	1847
175	3179
176	3250
177	2126
178	1413
179	2273
180	2977
181	2625
182	3572
183	4493
184	3582
185	3848
186	3525
187	881
188	769
189	3284
190	2385
191	2022
1	792
2	2967
3	2208
4	654
5	2857
6	1892
7	1511
8	4093
9	5035
10	5085
11	1176
12	1006
13	1754
14	3132
15	892
16	2084
17	998
18	3989
19	1569
20	1911
21	5601
22	3487
23	2834
24	1496
25	3441
26	1690
27	1581
28	2812
29	2866
30	733
31	1990
32	4855
33	3022
34	1413
35	1432
36	4411
37	3183
38	3842
39	1520
40	1216
41	1247
42	702
43	686
44	2124
45	1283
46	1412
47	1108
48	2005
49	1734
50	6459
51	7253
52	6585
53	2065
54	3316
55	747
56	480
57	1408
58	1526
59	2394
60	3012
61	876
62	2474
63	1928
64	1216
65	6692
66	3293
67	3056
68	3113
69	3331
70	2597
71	4008
72	2519
73	3822
74	1345
75	1887
76	667
77	2611
78	1848
79	1496
80	1455
81	2932
82	1183
83	1783
84	1254
85	877
86	755
87	1702
88	1398
89	3462
90	4310
91	1771
92	1521
93	3529
94	2065
95	6062
96	4706
97	2314
98	748
99	2777
100	1895
101	1042
102	880
103	962
104	1563
105	2216
106	2341
107	3846
108	3755
109	496
110	1238
111	3417
112	2185
113	2261
114	962
115	2742
116	3477
117	4097
118	1037
119	4652
120	3102
121	3543
122	426
123	1527
124	615
125	2638
126	2884
127	1781
128	2519
129	1229
130	1951
131	1806
132	2605
133	1624
134	1333
135	1723
136	2262
137	1906
138	1977
139	3658
140	529
141	3573
142	2108
143	3669
144	5046
145	2759
146	4251
147	2261
148	2240
149	3195
150	3058
151	3785
152	601
153	1297
154	2614
155	2733
156	4545
157	4302
158	796
159	1982
160	2506
161	1257
162	1247
163	733
164	1721
165	852
166	502
167	573
168	4284
169	873
170	1938
171	1322
172	1398
173	2218
174	4412
175	1461
176	906
177	2383
178	2450
179	2776
180	4425
181	3761
182	3202
183	4815
184	3643
185	4469
186	573
187	548
188	2622
189	4878
190	1954
191	4138
192	992
193	951
194	4653
195	1321
196	4692
197	2693
198	1867
199	958
200	687
201	3595
202	4453
203	2652
204	1876
205	3148
206	2341
207	2881
208	5511
209	1096
210	2202
211	738
212	1560
213	4985
214	1580
215	6476
216	368
217	1176
218	1354
219	3505
220	1449
221	4247
222	365
223	3918
224	3836
225	762
226	1433
227	1753
228	2639
229	4294
230	1735
231	1331
232	5204
233	2704
234	2190
235	839
236	5568
237	2602
238	1184
239	1446
240	1374
241	3062
242	1652
1	2195
2	744
3	813
4	1989
5	2434
6	989
7	1429
8	1607
9	1991
10	1340
11	1436
12	1658
13	1035
14	904
15	4654
16	1499
17	1546
18	1812
19	1860
20	617
21	3155
22	1457
23	1444
24	1350
25	2869
26	1521
27	1809
28	2566
29	661
30	1815
31	693
32	1199
33	1939
34	1441
35	2159
36	1939
37	1800
38	1809
39	1331
40	1282
41	1841
42	1504
43	632
44	1174
45	1715
46	2034
47	847
48	1404
49	1434
50	969
51	1930
52	1001
53	1297
54	1408
55	1945
56	2002
57	1675
58	971
59	1654
60	1672
61	454
62	2295
63	1018
64	817
65	1107
66	1631
67	1169
68	654
69	1712
70	2113
71	2405
72	1089
73	2714
74	704
75	1131
76	2445
77	1824
78	2911
79	2899
80	998
81	376
82	2457
83	797
84	1142
85	1523
86	2566
87	1014
88	2433
89	1866
90	3153
91	1403
92	3426
93	812
94	2729
95	1721
96	1492
97	834
98	1277
99	1480
100	720
101	1804
102	1747
103	1688
104	1821
105	2441
106	1513
107	1990
108	2386
109	1660
110	1452
111	2003
112	1659
113	820
114	1840
115	2640
116	2059
117	1533
118	1233
119	2585
120	832
121	2019
122	664
123	1436
124	2882
125	4100
126	1437
127	2890
128	4339
129	872
130	855
131	557
132	918
133	1322
134	1744
135	1003
136	1523
137	860
138	2112
139	786
140	2207
141	2640
142	1398
143	1585
144	2083
145	2214
146	2909
147	921
148	469
149	1431
150	1284
151	2794
152	1422
153	1572
154	1160
155	838
156	1202
157	2080
158	1693
159	1608
160	1890
161	1805
162	2868
163	1957
164	1321
165	1049
166	888
167	1479
168	2703
169	750
170	951
171	2202
172	1210
173	2295
174	2483
175	1763
176	1705
177	1455
178	1440
179	1754
180	2137
181	929
182	1209
183	550
184	1850
185	1180
186	1069
187	1726
188	523
189	1776
190	1048
191	1548
192	1643
193	1678
194	1368
195	952
196	740
197	2571
198	1936
199	1863
200	1390
201	737
202	1473
203	1172
204	1186
205	1736
206	1703
207	2377
208	1383
209	992
210	1510
211	1968
212	804
213	765
214	850
215	1481
216	608
217	906
218	3489
219	1882
220	802
221	2222
222	1038
223	1024
224	1217
225	547
226	2221
227	2019
228	1048
229	1186
230	1690
231	1574
232	941
233	1066
234	3882
235	2286
236	1973
237	2009
238	1682
239	625
240	1218
241	1645
242	1170
243	3309
244	1131
245	701
246	1496
247	743
248	3339
249	1014
250	2393
251	1446
252	1955
253	832
254	2440
255	2574
256	3095
257	1232
258	964
259	1426
260	1825
261	2228
262	1978
263	1196
264	838
265	2644
266	1866
267	519
268	2568
269	1627
270	2353
271	723
272	3256
273	3149
274	1440
275	1581
276	939
277	2762
278	2265
279	1629
280	607
281	2117
282	1886
283	1532
284	2175
285	2519
286	2020
287	1826
288	946
289	1807
290	2261
291	2460
292	2631
293	2418
294	1049
295	2114
296	2140
297	1641
298	1605
299	1568
300	935
301	2405
302	937
303	1377
304	2992
305	2260
306	2006
307	1293
308	1803
309	1090
310	726
311	2148
312	3008
313	1526
314	1349
315	1706
316	679
317	1571
318	3271
319	1421
320	617
321	3566
322	3459
323	1507
324	1946
325	572
326	1436
327	756
328	1071
329	1581
330	913
331	1794
332	953
333	1604
334	644
335	727
336	2265
337	4340
338	2006
339	1208
340	1016
341	738
342	2139
343	1432
344	3434
345	735
346	1406
347	2577
348	1310
349	2150
350	693
351	1611
352	980
353	2034
354	654
355	1968
356	1343
357	1014
358	1620
359	1593
360	1958
361	815
362	2159
363	1059
364	2364
365	861
366	1485
367	1832
368	753
369	1125
370	1419
371	2351
372	1354
373	827
374	637
375	3943
376	782
377	393
378	377
379	495
380	265
381	414
382	417
383	794
384	425
385	740
386	656
387	899
388	1664
389	1242
390	807
391	3110
392	3145
393	4233
394	1724
395	2117
396	3615
397	2076
398	2337
399	1873
400	1629
401	362
402	3979
403	1344
404	3295
405	731
406	1934
407	1439
408	1777
409	985
410	4572
411	2687
412	3700
413	3388
414	1003
415	2626
416	2376
417	2625
418	1103
419	2114
420	2273
421	2404
422	1640
423	2752
424	2837
425	2948
426	2615
427	2265
428	2846
429	1864
430	1695
431	3121
432	2404
433	1734
434	3086
435	2299
436	1390
437	1228
438	3148
439	2463
440	3097
441	1439
442	4083
443	2225
444	2328
445	2441
446	1736
447	2027
448	2693
449	1763
450	3124
451	1171
452	1758
453	1486
454	2831
455	2806
456	2077
457	2578
458	3203
459	2458
460	5851
461	1612
462	1958
463	859
464	2166
465	1673
466	1773
467	1968
468	2039
469	2466
470	1208
471	1851
472	738
473	1248
474	3070
475	2169
476	1838
477	867
478	928
479	1069
480	304
481	868
482	1184
483	1486
484	2997
485	2586
486	1412
487	1015
488	2968
1	2140
2	1401
3	1935
4	1193
5	2169
6	816
7	2345
8	3191
9	1683
10	5771
11	3317
12	623
13	1758
14	6598
15	934
16	3688
17	405
18	755
19	1708
20	3459
21	418
22	496
23	1537
24	688
25	3769
26	3650
27	2134
28	1624
29	529
30	845
31	1755
32	1025
33	1942
34	1754
35	749
36	3187
37	1408
38	2452
39	2030
40	710
41	4679
42	2118
43	1336
44	1099
45	2846
46	818
47	1526
48	4588
49	514
50	3632
51	878
52	2744
53	1414
54	1358
55	2345
56	814
57	687
58	1725
59	2091
60	1129
61	1304
62	1351
63	2221
64	755
65	736
66	1220
67	2129
68	1432
69	1147
70	1766
71	1730
72	2103
73	564
74	903
75	2282
76	2689
77	2303
78	1143
79	787
80	3570
81	2645
82	2513
83	972
84	3689
85	870
86	1974
87	717
88	4469
89	1239
90	2132
91	1512
92	493
93	1500
94	1274
95	1518
96	2560
97	2405
98	1377
99	2236
100	755
101	1459
102	603
103	1396
104	2418
105	1352
106	1151
107	1598
108	1840
109	1397
110	2925
111	2310
112	1464
113	1325
114	2547
115	2310
116	2381
117	2922
118	929
119	1225
120	2482
121	1530
122	2127
123	1165
124	913
125	469
126	974
127	1958
128	1322
129	1333
130	1529
131	659
132	1261
133	1699
134	2157
135	512
136	2010
137	1077
138	1952
139	3469
140	2193
141	2191
142	2472
143	2328
144	1301
145	1426
146	766
147	1505
148	802
149	1743
150	603
151	556
152	2451
153	939
154	872
155	1917
156	2196
157	2726
158	652
159	1487
160	1519
161	1344
162	2349
163	1216
164	1640
165	1006
166	1384
167	2046
168	2080
169	1383
170	970
171	1201
172	2032
173	2102
174	700
175	1903
176	1056
177	872
178	1487
179	969
180	556
181	1797
182	1556
183	2224
184	1241
185	763
186	936
187	2545
188	1842
189	1237
190	535
191	495
192	281
193	644
194	932
195	474
196	1050
197	850
198	932
199	1495
200	573
201	1451
202	443
203	597
204	779
205	338
206	736
207	127
208	143
209	837
210	463
211	490
212	1079
213	1807

## Sheet: Expt 3
MF-Dll4fl/fl 3	Injury and 40d regeneration
	Cross sectional Area
1	1313
2	1298
3	1379
4	1057
5	902
6	1227
7	1212
8	931
9	552
10	763
11	1052
12	945
13	1162
14	1371
15	1456
16	471
17	459
18	989
19	444
20	897
21	1184
22	1294
23	687
24	898
25	415
26	698
27	808
28	773
29	979
30	1148
31	1060
32	1071
33	956
34	478
35	141
36	1228
37	207
38	799
39	870
40	707
41	1300
42	765
43	472
44	350
45	285
46	933
47	271
48	747
49	1494
50	985
51	1197
52	591
53	667
54	617
55	542
56	1495
57	1099
58	801
59	302
60	439
61	779
62	1224
63	543
64	156
65	164
66	257
67	392
68	584
69	187
70	645
71	291
72	516
73	300
74	201
75	873
76	713
77	690
78	467
79	457
80	1442
81	1219
82	1749
83	1363
84	509
85	1848
86	1202
87	264
88	530
89	853
90	1332
91	1405
92	357
93	224
94	400
95	336
96	270
97	339
98	94
99	330
100	478
101	1031
102	857
103	854
104	727
105	133
106	1435
107	613
108	641
109	876
110	771
111	583
112	556
113	695
114	252
115	568
116	670
117	493
118	873
119	915
120	1049
121	831
122	363
123	234
124	348
125	296
126	438
127	155
128	551
129	540
130	181
131	513
132	948
133	805
134	796
135	247
136	1036
137	530
138	616
139	716
140	520
141	1185
142	365
143	1040
144	1111
145	1429
146	2234
147	2069
148	742
149	796
150	297
151	634
152	762
153	1016
154	739
155	1525
156	1788
157	681
158	844
159	1256
160	1807
161	1342
162	2118
163	2175
164	2341
165	1698
166	1394
167	1503
168	1014
169	668
170	1229
171	615
172	812
173	1339
174	649
175	181
176	142
177	264
178	605
179	202
180	416
181	207
182	345
183	266
184	228
185	375
186	1215
187	354
188	398
189	208
190	157
191	131
192	258
193	657
194	302
195	252
196	236
197	446
198	608
199	270
200	91
201	351
202	1969
203	1314
204	199
205	253
206	246
207	521
208	1122
209	1199
210	421
211	731
212	864
213	687
214	1179
215	1355
216	1011
217	1097
218	502
219	1532
220	1807
221	1516
222	251
223	219
224	307
225	305
226	1294
227	2022
228	1188
229	652
230	537
231	1082
232	1033
233	1160
234	1500
235	1280
236	1156
237	1376
238	613
239	1191
240	1639
241	856
242	1952
243	1710
244	1519
245	1331
246	218
247	1043
248	1263
249	673
250	722
251	1269
252	1037
253	1535
254	1329
255	1364
256	1934
257	2458
258	1764
259	1772
260	819
261	751
262	656
263	826
264	1439
265	1551
266	1169
267	1691
268	1824
269	395
270	913
271	1134
272	1096
273	1178
274	1393
275	1359
276	918
277	1834
278	1170
279	545
280	628
281	996
282	1036
283	1350
284	1291
285	990
286	1421
287	2358
288	2074
289	1587
290	910
291	1458
292	191
293	1971
294	1547
295	1458
296	1829
297	1856
298	1543
299	2056
300	1748
301	1421
302	1674
303	1281
304	894
305	1387
306	2365
307	1586
308	985
309	1496
310	1153
311	1262
312	1303
313	1974
314	822
315	1802
316	680
317	1582
318	995
319	786
320	1305
321	1484
322	1780
323	1535
324	855
325	1508
326	876
327	710
328	542
329	448
330	774
331	1048
332	2372
333	2454
334	2558
335	1520
336	963
337	1607
338	1297
339	657
340	542
341	1145
342	221
343	301
344	426
345	193
346	253
347	596
348	1161
349	827
350	736
351	272
352	798
353	2470
354	641
355	365
356	340
357	735
358	625
359	260
360	236
361	282
362	257
363	249
364	210
365	677
366	422
367	1249
368	755
369	368
370	206
371	567
372	1257
373	711
374	723
375	790
376	454
377	409
378	367
379	1082
380	879
381	965
382	351
383	232
384	177
385	264
386	852
1	1390
2	1007
3	469
4	327
5	901
6	699
7	433
8	126
9	470
10	175
11	198
12	273
13	154
14	860
15	178
16	357
17	422
18	477
19	628
20	342
21	466
22	485
23	450
24	531
25	201
26	1079
27	1197
28	87
29	483
30	820
31	700
32	255
33	334
34	705
35	348
36	729
37	977
38	207
39	957
40	430
41	109
42	136
43	98
44	159
45	130
46	353
47	395
48	582
49	742
50	195
51	297
52	64
53	116
54	51
55	272
56	447
57	241
58	290
59	264
60	162
61	437
62	670
63	393
64	746
65	243
66	177
67	115
68	264
69	533
70	349
71	1199
72	582
73	72
74	938
75	1423
76	1330
77	479
78	1458
79	632
80	1360
81	699
82	210
83	262
84	272
85	458
86	675
87	198
88	719
89	191
90	454
91	429
92	256
93	213
94	322
95	426
96	291
97	187
98	103
99	303
100	475
101	109
102	134
103	138
104	954
105	355
106	304
107	397
108	254
109	128
110	568
111	588
112	612
113	427
114	551
115	775
116	670
117	599
118	474
119	456
120	318
121	655
122	295
123	794
124	162
125	138
126	628
127	684
128	150
129	866
130	412
131	742
132	553
133	545
134	160
135	892
136	1526
137	344
138	652
139	270
140	988
141	262
142	530
143	1555
144	971
145	526
146	671
147	596
148	861
149	1003
150	660
151	1447
152	721
153	886
154	682
155	1234
156	1161
157	239
158	711
159	437
160	1060
161	1221
162	368
163	596
164	492
165	1048
166	1363
167	1025
168	427
169	834
170	408
171	447
172	1105
173	211
174	497
175	471
176	614
177	452
178	495
179	935
180	777
181	497
182	144
183	429
184	249
185	379
186	169
187	425
188	472
189	520
190	1095
191	748
192	568
193	1525
194	619
195	925
196	1192
197	873
198	351
199	622
200	788
201	758
202	1523
203	1375
204	220
205	141
206	964
207	1325
208	656
209	629
210	636
211	240
212	709
213	1124
214	290
215	681
216	1127
217	567
218	357
219	654
220	405
221	346
222	1318
223	704
224	757
225	212
226	1423
227	751
228	164
229	251
230	230
231	270
232	1053
233	1175
234	537
235	485
236	155
237	400
238	525
239	367
240	644
241	936
242	237
243	594
244	970
245	1154
246	425
247	124
248	257
249	539
250	334
251	331
252	940
253	560
254	889
255	437
256	403
257	549
258	253
259	452
260	602
261	750
262	734
263	685
264	482
265	527
266	848
267	276
268	472
269	443
270	772
271	1338
272	1042
273	995
274	271
275	218
276	913
277	665
278	605
279	635
280	450
281	324
282	625
283	571
284	288
285	992
286	571
287	546
288	564
289	932
290	1113
291	1265
292	1260
293	1211
294	251
295	1129
296	220
297	1168
298	1016
299	1053
300	1294
301	478
302	430
303	385
304	483
305	624
306	837
307	563
308	261
309	260
310	160
311	959
312	593
313	641
314	1555
315	649
316	715
317	1646
318	1546
319	1595
320	713
321	700
322	609
323	1049
324	1370
325	1784
326	1871
327	727
328	1494
329	956
330	2117
331	1378
332	1281
333	974
334	183
335	469
336	737
337	2059
338	1220
339	1290
340	1545
341	1340
342	366
343	133
344	331
345	1221
346	883
347	585
348	1246
349	1372
350	226
351	459
352	623
353	130
354	861
355	275
356	1235
357	164
358	296
359	266
360	311
361	486
362	328
363	551
364	756
365	893
366	693
367	854
368	1003
369	255
370	865
371	1039
372	717
373	530
374	1072
375	642
376	1218
377	680
378	646
379	933
380	994
381	458
382	1678
383	352
384	1105
385	428
386	1171
387	924
388	528
389	164
390	1019
391	565
392	1675
393	352
394	2385
395	2041
396	836
397	771
398	1224
399	1044
400	890
401	613
402	1059
403	439
404	1228
405	419
406	1186
407	762
408	2228
409	987
410	1780
411	1745
412	1145
413	1205
414	1322
415	846
416	1204
417	1127
418	710
419	1192
420	1207
421	1477
422	978
423	791
424	1639
425	609
426	1927
427	2246
428	1166
429	1028
430	476
431	1575
432	938
433	1538
434	1303
435	1059
436	1338
437	1107
438	1091
439	1871
440	1613
441	502
442	657
443	1888
444	1003
445	1385
446	1145
447	1173
448	1385
449	1159
450	1976
451	429
452	712
453	1589
454	1275
455	1190
456	729
457	429
458	933
459	799
460	1070
461	542
462	2151
463	904
464	1900
465	1296
466	907
467	323
468	1412
469	1597
470	1116
471	1078
472	621
473	1085
474	995
475	1033
476	1101
477	909
478	2334
479	1108
480	1205
481	795
482	1206
483	853
484	1364
485	1702
486	1191
487	1855
488	1710
489	2275
490	2181
491	1534
492	1375
493	2228
494	2158
495	1364
496	1798
497	1248
498	1647
499	1521
500	1120
501	990
502	1208
503	1168
504	486
505	323
506	109
507	137
508	1402
509	823
510	868
511	1030
512	478
513	295
514	1023
515	559
516	677
517	287
518	180
519	493
520	564
521	643
522	321
523	348
524	292
525	301
526	341
527	630
528	350
529	420
530	385
531	255
532	333
533	302
534	881
535	1112
536	1062
537	583
538	1475
539	542
540	316
541	139
542	431
543	513
544	812
545	979
546	1622
547	695
548	1936
549	1369
550	1440
551	973
552	766
553	1489
554	270
555	487
556	1074
557	861
558	1006
559	548
560	1425
561	1142
562	1431
563	411
564	188
565	241
566	193
567	82
568	301
569	174
570	873
571	2014
572	1581
573	367
574	470
575	1406
576	157
577	423
578	615
579	1123
580	240
581	344
582	162
583	292
584	212
585	451
586	216
587	241
588	240
589	220
590	674
591	139
592	173
593	774
594	272
595	158
1	1577
2	2219
3	1950
4	436
5	2116
6	920
7	1696
8	1400
9	1788
10	2183
11	714
12	980
13	1371
14	249
15	2178
16	1482
17	1203
18	358
19	55
20	212
21	109
22	273
23	898
24	456
25	905
26	822
27	252
28	828
29	162
30	1237
31	1299
32	1301
33	1954
34	1698
35	855
36	940
37	553
38	502
39	332
40	628
41	879
42	1806
43	1220
44	1562
45	1620
46	1003
47	1568
48	977
49	373
50	732
51	396
52	355
53	922
54	220
55	287
56	393
57	589
58	834
59	1365
60	294
61	699
62	1946
63	187
64	983
65	1434
66	185
67	159
68	374
69	408
70	123
71	227
72	505
73	482
74	298
75	1169
76	447
77	1915
78	2788
79	947
80	1077
81	877
82	312
83	563
84	463
85	929
86	1140
87	455
88	898
89	866
90	856
91	386
92	326
93	716
94	991
95	523
96	715
97	360
98	947
99	400
100	981
101	502
102	545
103	637
104	331
105	630
106	338
107	1251
108	640
109	884
110	727
111	1341
112	872
113	682
114	510
115	848
116	500
117	338
118	316
119	521
120	1533
121	866
122	486
123	864
124	360
125	303
126	1368
127	964
128	872
129	1077
130	370
131	894
132	795
133	230
134	380
135	161
136	582
137	926
138	696
139	664
140	252
141	159
142	186
143	93
144	182
145	275
146	463
147	252
148	285
149	287
150	700
151	417
152	354
153	303
154	142
155	221
156	195
157	289
158	164
159	450
160	300
161	100
162	189
163	195
164	790
165	743
166	638
167	311
168	301
169	203
170	174
171	305
172	91
173	228
174	274
175	354
176	420
177	152
178	128
179	208
180	325
181	491
182	258
183	145
184	109
185	388
186	207
187	252
188	182
189	204
190	464
191	308
192	243
193	243
194	270
195	316
196	897
197	212
198	201
199	525
200	187
201	142
202	120
203	76
204	55
205	175
206	183
207	114
208	229
209	443
210	209
211	250
212	73
213	1510
214	1856
215	1551
216	482
217	247
218	147
219	234
220	670
221	386
222	332
223	518
224	332
225	199
226	125
227	576
228	196
229	214
230	68
231	269
232	168
233	237
234	263
235	227
236	473
237	374
238	206
239	558
240	163
241	270
242	846
243	298
244	290
245	347
246	364
247	562
248	892
249	540
250	234
251	277
252	289
253	360
254	379
255	1482
256	268
257	82
258	112
259	365
260	383
261	405
262	280
263	158
264	132
265	247
266	217
267	1445
268	348
269	264
270	472
271	1314
272	259
273	115
274	974
275	530
276	479
277	579
278	352
279	663
280	642
281	420
282	912
283	464
284	467
285	491
286	470
287	363
288	254
289	641
290	219
291	132
292	232
293	220
294	395
295	199
296	248
297	408
298	711
299	438
300	247
301	476
302	287
303	536
304	151
305	122
306	304
307	338
308	275
309	113
310	463
311	267
312	615
313	242
314	686
315	1210
316	384
317	861
318	654
319	244
320	323
321	401
322	301
323	480
324	1031
325	1072
326	640
327	1657
328	286
329	507
330	305
331	484
332	339
333	937
334	338
335	401
336	205
337	511
1	898
2	681
3	1441
4	994
5	1042
6	1690
7	1710
8	882
9	785
10	1360
11	890
12	2633
13	3092
14	1095
15	764
16	1429
17	670
18	962
19	957
20	790
21	1661
22	745
23	942
24	897
25	1628
26	989
27	1580
28	1591
29	884
30	1396
31	1901
32	1115
33	1069
34	1419
35	2139
36	1182
37	1071
38	704
39	1085
40	975
41	837
42	810
43	2263
44	1621
45	777
46	734
47	1015
48	2158
49	2501
50	2154
51	538
52	750
53	492
54	610
55	1428
56	1210
57	1415
58	875
59	436
60	3654
61	2683
62	837
63	833
64	1909
65	608
66	937
67	1009
68	693
69	1757
70	1488
71	1307
72	511
73	1721
74	680
75	690
76	1855
77	1253
78	1946
79	636
80	2714
81	1098
82	1304
83	886
84	1188
85	2015
86	1175
87	889
88	740
89	2432
90	1556
91	2632
92	1297
93	2976
94	1352
95	2141
96	621
97	759
98	1360
99	1638
100	846
101	3206
102	1784
103	574
104	1572
105	2395
106	1257
107	2711
108	2841
109	794
110	2543
111	757
112	1108
113	1387
114	792
115	1619
116	2110
117	1253
118	2303
119	822
120	1338
121	1439
122	2070
123	1437
124	2083
125	613
126	682
127	1051
128	934
129	2395
130	2072
131	3320
132	2038
133	846
134	981
135	916
136	866
137	929
138	2701
139	1567
140	1213
141	582
142	2140
143	1131
144	2245
145	3268
146	1990
147	1177
148	1457
149	1301
150	923
151	1102
152	1886
153	401
154	1313
155	652
156	992
157	731
158	943
159	1624
160	956
161	1014
162	1248
163	767
164	1935
165	1602
166	826
167	1461
168	821
169	778
170	831
171	739
172	970
173	2019
174	2621
175	2615
176	859
177	2603
178	1113
179	935
180	1521
181	1661
182	1014
183	1243
184	753
185	664
186	1591
187	2409
188	566
189	990
190	957
191	931
192	548
193	511
194	2245
195	647
196	1051
197	2054
198	613
199	1142
200	1615
201	916
202	960
203	517
204	1110
205	452
206	493
207	506
208	946
209	949
210	1022
211	3370
212	619
213	719
214	410
215	1330
216	739
217	2872
218	904
219	1445
220	2030
221	541
222	1040
223	1503
224	1510
225	1048
226	1426
227	1427
228	651
229	1753
230	1891
231	796
232	1654
233	1355
234	1104
235	649
236	1728
237	2367
238	1679
239	1358
240	3015
241	725
242	1870
243	1639
244	609
245	681
246	572
247	638
248	679
249	1171
250	495
251	758
252	534
253	668
254	525
255	477
256	741
257	1366
258	2898
259	2382
260	959
261	964
262	1178
263	572
264	847
265	797
266	570
267	1211
268	1688
269	1318
270	395
271	2708
272	766
273	1661
274	553
275	545
276	548
277	997
278	658
279	527
280	571
281	919
282	925
283	575
284	1464
285	1540
286	1314
287	649
288	733
289	1412
290	643
291	710
292	593
293	755
294	779
295	574
296	919
297	535
298	759
299	623
300	484
301	1270
302	1734
303	1760
304	828
305	1019
306	927
307	206
308	145
309	199
310	845
311	334
312	221
313	1060
314	1720
315	428
316	543
317	232
318	229
319	238
320	322
321	1228
322	200
323	367
324	565
325	246
326	172
327	472
328	371
329	404
330	405
331	264
332	681
333	299
334	337
335	1103
336	855
337	478
338	450
339	643
340	269
341	481
342	732
343	304
344	303
345	506
346	276
347	506
348	1816
349	1356
350	587
351	307
352	300
353	267
354	287
355	232
356	121
357	402
358	190
359	209
360	273
361	500
362	629
363	442
364	509
365	244
366	170
367	186
368	748
369	297
370	375
371	324
372	189
373	248
374	319
375	425
376	512
377	242
378	335
379	409
380	315
381	543
382	307
383	303
384	988
385	385
386	1587
387	291
388	357
389	262
390	94
391	221
392	281
393	286
394	118
395	215
396	376
397	1128
398	390
399	365
400	578
401	151
402	260
403	263
404	129
405	357
406	637
407	311
408	289
409	235
410	300
411	373
412	435
413	173
414	330
415	250
416	231
417	482
418	321
419	302
420	204
421	234
422	461
423	211
424	260
425	543
426	570
427	204
428	1930
429	362
430	263
431	189
432	368
433	469
434	147
435	134
436	341
437	170
438	383
439	267
440	868
441	429
442	248
443	394
444	354
445	536
446	226
447	278
448	176
449	500
450	221
451	457
452	544
453	321
454	179
455	667
456	435
457	342
458	429
459	303
460	526
461	334
462	528
463	545
464	387
465	447
466	144
467	161
468	309
469	1355
470	97
1	3062
2	920
3	1872
4	1472
5	2155
6	523
7	1114
8	665
9	1845
10	651
11	590
12	474
13	1148
14	1548
15	1988
16	1294
17	700
18	585
19	1925
20	1349
21	1610
22	2804
23	1920
24	1079
25	1640
26	528
27	1025
28	812
29	4249
30	600
31	2134
32	1307
33	945
34	1715
35	2564
36	761
37	1199
38	850
39	2073
40	910
41	943
42	2878
43	3428
44	1202
45	810
46	726
47	860
48	1619
49	2058
50	2297
51	1056
52	839
53	3007
54	472
55	767
56	805
57	577
58	1176
59	535
60	2291
61	679
62	1088
63	2365
64	1046
65	436
66	703
67	1995
68	1836
69	500
70	1530
71	1637
72	3302
73	1434
74	556
75	1532
76	521
77	2335
78	1323
79	833
80	1248
81	1551
82	541
83	758
84	1742
85	604
86	2495
87	2783
88	616
89	3244
90	962
91	1005
92	1561
93	1270
94	2475
95	1041
96	2186
97	742
98	712
99	562
100	866
101	4637
102	1848
103	511
104	1973
105	2558
106	1620
107	2411
108	731
109	927
110	1424
111	936
112	886
113	729
114	1096
115	1472
116	552
117	1170
118	2186
119	740
120	527
121	1621
122	969
123	931
124	1625
125	1543
126	797
127	701
128	834
129	1433
130	3354
131	469
132	600
133	2190
134	957
135	1322
136	1112
137	1078
138	2036
139	1802
140	1926
141	875
142	1492
143	603
144	1113
145	930
146	1227
147	867
148	2336
149	406
150	589
151	1040
152	1863
153	3801
154	2824
155	1995
156	557
157	749
158	1373
159	2857
160	517
161	653
162	1216
163	2312
164	760
165	2137
166	567
167	1796
168	834
169	964
170	746
171	724
172	1186
173	1366
174	941
175	715
176	1488
177	3086
178	1354
179	847
180	1595
181	1405
182	1781
183	2865
184	1374
185	2557
186	1504
187	1366
188	1486
189	1199
190	699
191	1123
192	2278
193	561
194	439
195	2199
196	1495
197	818
198	1197
199	1517
200	718
201	3158
202	592
203	964
204	1466
205	1045
206	865
207	1551
208	4193
209	946
210	895
[truncated: 352 more rows]

## Sheet: Expt 4
MF-Dll4fl/fl 4	Injury and 40d regeneration
	Cross sectional Area
1	1102
2	1123
3	617
4	527
5	1690
6	720
7	597
8	735
9	424
10	819
11	632
12	554
13	932
14	1311
15	949
16	743
17	1233
18	661
19	642
20	905
21	1337
22	733
23	1423
24	1069
25	1079
26	838
27	738
28	915
29	1011
30	852
31	1391
32	485
33	1731
34	653
35	645
36	1058
37	1023
38	660
39	474
40	588
41	535
42	1637
43	952
44	1589
45	754
46	682
47	1289
48	827
49	629
50	798
51	523
52	576
53	1544
54	1007
55	419
56	1275
57	1485
58	1323
59	692
60	673
61	639
62	1587
63	1880
64	540
65	578
66	2296
67	585
68	489
69	1006
70	605
71	634
72	588
73	1097
74	1236
75	595
76	2022
77	633
78	670
79	759
80	764
81	1420
82	1252
83	898
84	776
85	580
86	657
87	558
88	648
89	957
90	513
91	805
92	943
93	748
94	696
95	581
96	1633
97	774
98	932
99	555
100	2762
101	966
102	551
103	1268
104	828
105	999
106	707
107	706
108	692
109	992
110	1023
111	692
112	1371
113	708
114	540
115	747
116	724
117	1207
118	524
119	785
120	1009
121	631
122	698
123	978
124	685
125	566
126	1056
127	2352
128	721
129	943
130	877
131	842
132	740
133	681
134	707
135	865
136	979
137	514
138	896
139	1170
140	1350
141	884
142	866
143	1905
144	842
145	503
146	1671
147	725
148	654
149	510
150	3008
151	875
152	1049
153	783
154	895
155	709
156	540
157	787
158	1246
159	907
160	577
161	2184
162	758
163	1263
164	1202
165	2269
166	1039
167	1693
168	799
169	1117
170	1140
171	682
172	1768
173	2626
174	976
175	1442
176	1139
177	634
178	1560
179	588
180	1335
181	1923
182	880
183	886
184	1227
185	910
186	575
187	867
188	1005
189	605
190	514
191	512
192	523
193	920
194	726
195	1210
196	591
197	1408
198	602
199	700
200	930
201	2480
202	505
203	2362
204	423
205	859
206	818
207	562
208	668
209	1222
210	664
211	936
212	970
213	1442
214	792
215	1175
216	690
217	976
218	510
219	2900
220	551
221	844
222	501
223	859
224	583
225	1646
226	1254
227	1310
228	457
229	2183
230	1211
231	418
232	662
233	967
234	1284
235	1073
236	1282
237	2489
238	842
239	903
240	540
241	1494
242	725
243	2536
244	943
245	1194
246	1504
247	897
248	695
249	542
250	1022
251	668
252	849
253	538
254	1311
255	847
256	2259
257	840
258	432
259	706
260	700
261	791
262	1033
263	3045
264	544
265	532
266	511
267	721
268	973
269	1622
270	569
271	1466
272	546
273	1252
274	1348
275	750
276	752
277	1345
278	489
279	628
280	461
281	626
282	1048
283	468
284	405
285	534
286	749
287	1178
288	407
289	445
290	1689
291	864
292	565
293	602
294	589
295	1673
296	779
297	789
298	795
299	760
300	793
301	733
302	2108
303	698
304	835
305	1004
306	461
307	884
308	474
309	384
310	1082
311	646
312	910
313	711
314	578
315	822
316	771
317	751
318	621
319	1142
320	1883
321	612
322	551
323	799
324	709
325	1929
326	626
327	739
328	488
329	1043
330	555
331	759
332	2437
333	1996
334	1457
335	570
336	1003
337	749
338	490
339	714
340	451
341	590
342	494
343	520
344	704
345	626
346	1336
347	521
348	603
349	1073
350	503
351	782
352	1084
353	711
354	884
355	724
356	1000
357	468
358	506
359	820
360	785
361	1123
362	630
363	803
364	616
365	766
366	694
367	1423
368	1915
369	829
370	1026
371	957
372	1589
373	861
374	582
375	658
376	706
377	549
378	713
379	1886
380	790
381	891
382	720
383	1199
384	996
385	877
386	1828
387	995
388	947
389	953
390	387
391	2382
392	540
393	588
394	505
395	453
396	672
397	771
398	499
399	484
400	924
401	602
402	959
403	630
404	1543
405	476
406	471
407	1396
408	695
409	533
410	657
411	755
412	996
413	1758
414	644
415	508
416	1215
417	731
418	556
419	523
420	633
421	694
422	1093
423	1702
424	1227
425	502
426	774
427	796
428	882
429	670
430	637
431	505
432	628
433	2316
434	568
435	627
436	1117
437	724
438	583
439	556
440	576
441	553
442	583
443	1507
444	1635
445	700
446	1581
447	786
448	701
449	549
450	1227
451	706
452	695
453	747
454	628
455	599
456	544
457	2443
458	853
459	360
460	932
461	636
462	1188
463	593
464	750
465	477
466	549
467	591
468	991
469	1045
470	833
471	1515
472	1702
473	684
474	712
475	510
476	942
477	1049
478	773
479	856
480	1160
481	1191
482	1024
483	525
484	656
485	1138
486	624
487	875
488	512
489	717
490	670
491	1252
492	654
493	834
494	439
495	712
496	1265
497	622
498	1327
499	1717
500	513
501	673
502	868
503	643
504	488
505	618
506	567
507	956
508	387
509	727
510	679
511	1223
512	892
513	561
514	1371
515	2080
516	512
517	770
518	1010
519	704
520	811
521	759
522	1915
523	2727
524	322
525	611
526	435
527	148
528	285
529	371
530	253
531	628
532	437
533	1717
534	2444
535	550
536	567
537	492
538	558
539	890
540	360
541	223
542	439
543	627
544	509
545	660
546	1518
547	281
548	3536
549	1848
550	856
551	806
552	401
553	404
554	419
555	2133
556	511
557	710
558	639
559	2687
560	698
561	503
562	569
563	183
564	248
565	199
566	245
567	145
568	676
569	608
570	610
571	540
572	654
573	457
574	467
575	641
576	741
577	575
578	479
579	387
580	520
581	750
582	258
583	153
584	432
585	149
586	259
587	721
588	539
589	936
590	860
591	357
592	252
593	377
594	236
595	704
596	787
597	936
1	1256
2	504
3	760
4	915
5	750
6	1528
7	528
8	774
9	564
10	1399
11	400
12	928
13	864
14	531
15	1150
16	1058
17	826
18	1606
19	758
20	739
21	1797
22	584
23	929
24	794
25	1006
26	362
27	2041
28	839
29	477
30	818
31	1314
32	734
33	671
34	455
35	527
36	815
37	839
38	878
39	748
40	674
41	481
42	1055
43	641
44	1480
45	474
46	952
47	900
48	984
49	894
50	1655
51	2131
52	1307
53	594
54	842
55	994
56	435
57	676
58	698
59	1298
60	1422
61	2006
62	832
63	810
64	563
65	469
66	1233
67	478
68	1322
69	517
70	902
71	932
72	870
73	832
74	828
75	2407
76	826
77	869
78	1342
79	1452
80	630
81	722
82	737
83	570
84	588
85	917
86	2614
87	1281
88	570
89	602
90	1255
91	1226
92	573
93	883
94	851
95	930
96	976
97	1143
98	1621
99	837
100	532
101	1425
102	709
103	671
104	2673
105	582
106	703
107	885
108	652
109	487
110	792
111	923
112	758
113	1141
114	789
115	777
116	1101
117	590
118	472
119	3925
120	820
121	572
122	479
123	677
124	658
125	1785
126	935
127	1941
128	490
129	2056
130	729
131	814
132	1047
133	788
134	1079
135	1070
136	746
137	1377
138	1339
139	787
140	1087
141	3183
142	668
143	546
144	758
145	2142
146	803
147	1715
148	1382
149	488
150	1165
151	1085
152	482
153	578
154	519
155	899
156	567
157	1027
158	744
159	652
160	515
161	1167
162	556
163	737
164	516
165	809
166	520
167	1486
168	536
169	580
170	728
171	462
172	1171
173	629
174	1130
175	798
176	501
177	1368
178	635
179	531
180	621
181	734
182	1621
183	1406
184	603
185	1758
186	873
187	973
188	1392
189	763
190	967
191	1321
192	526
193	467
194	1053
195	2158
196	717
197	1013
198	1870
199	1145
200	1206
201	515
202	895
203	516
204	569
205	1072
206	971
207	779
208	685
209	1938
210	1093
211	749
212	619
213	1063
214	870
215	401
216	551
217	673
218	1746
219	698
220	783
221	834
222	642
223	1115
224	437
225	1400
226	618
227	1306
228	731
229	823
230	819
231	598
232	1025
233	1371
234	639
235	989
236	1032
237	1183
238	498
239	1491
240	1594
241	702
242	492
243	1447
244	869
245	774
246	883
247	1406
248	541
249	556
250	2000
251	711
252	635
253	718
254	916
255	1751
256	1279
257	739
258	669
259	2321
260	672
261	2206
262	2094
263	848
264	640
265	1034
266	873
267	815
268	781
269	818
270	1384
271	875
272	1696
273	1089
274	642
275	1017
276	3186
277	558
278	403
279	558
280	949
281	396
282	751
283	903
284	470
285	919
286	1781
287	573
288	1234
289	648
290	917
291	803
292	429
293	1762
294	676
295	2240
296	1339
297	568
298	1194
299	1534
300	1246
301	957
302	2521
303	578
304	1011
305	834
306	583
307	867
308	2941
309	1023
310	668
311	409
312	514
313	607
314	1747
315	1285
316	3690
317	555
318	1184
319	600
320	1431
321	650
322	838
323	724
324	676
325	659
326	1293
327	640
328	1378
329	2148
330	682
331	1038
332	960
333	1450
334	661
335	594
336	1119
337	495
338	627
339	1246
340	1210
341	831
342	619
343	566
344	1024
345	698
346	1578
347	872
348	641
349	848
350	782
351	1524
352	728
353	911
354	824
355	1148
356	2866
357	1776
358	767
359	545
360	561
361	707
362	469
363	970
364	1783
365	950
366	732
367	1139
368	969
369	1715
370	568
371	4039
372	1715
373	744
374	1511
375	603
376	882
377	1193
378	801
379	2099
380	1132
381	1150
382	1308
383	2209
384	1178
385	2294
386	1040
387	811
388	860
389	495
390	3162
391	2649
392	905
393	1104
394	595
395	599
396	795
397	635
398	538
399	1493
400	737
401	537
402	1521
403	495
404	1047
405	2823
406	1303
407	784
408	952
409	706
410	777
411	456
412	833
413	454
414	937
415	1112
416	706
417	1830
418	1648
419	1260
420	965
421	1429
422	1552
423	702
424	1216
425	592
426	1460
427	1060
428	756
429	1285
430	1323
431	948
432	853
433	965
434	952
435	883
436	2428
437	507
438	613
439	1740
440	751
441	805
442	665
443	477
444	523
445	1289
446	1328
447	857
448	601
449	594
450	555
451	1850
452	804
453	584
454	1734
455	586
456	485
457	882
458	874
459	1336
460	1535
461	529
462	1385
463	1614
464	709
465	767
466	889
467	1578
468	817
469	883
470	635
471	614
472	765
473	174
474	662
475	850
476	810
477	710
478	747
479	940
480	695
481	813
482	824
483	1298
484	644
485	309
486	587
487	775
488	1332
489	307
490	267
491	776
492	556
493	950
494	350
495	600
496	546
497	2085
498	3086
499	1884
500	445
501	663
502	222
503	715
504	398
505	392
506	551
507	261
508	210
509	338
510	547
511	906
512	433
513	1023
514	2537
515	233
516	426
517	867
518	507
519	445
520	535
521	357
522	1268
523	620
524	325
525	1391
526	924
527	924
528	379
529	819
530	491
531	1286
532	1425
533	671
534	929
535	878
536	393
537	418
538	2777
539	2429
540	1584
541	1790
542	988
543	1331
544	3347
545	1269
546	3026
547	1512
548	1203
549	3146
550	1918
551	3478
552	1578
553	3436
554	3392
555	875
556	1153
557	3496
558	2477
559	1709
560	3524
561	2187
562	957
563	1673
564	2846
565	4025
566	4814
567	3818
568	1375
569	776
570	1703
571	1137
572	2721
573	3775
574	2506
575	2977
576	1336
577	863
578	2441
579	2702
580	2692
581	2343
582	2347
583	1982
584	3608
585	3587
586	3271
587	3061
588	2061
589	1725
590	2590
591	2937
592	2308
593	3616
594	1134
595	2355
596	2732
597	2551
598	2227
599	1372
600	1407
601	1767
602	2355
603	2272
604	3438
605	2122
606	1468
607	584
608	2166
609	1165
610	1025
611	738
612	246
613	1231
614	2749
615	2410
616	1501
617	2446
618	2204
619	2848
620	1704
621	1769
622	1459
1	466
2	741
3	711
4	1186
5	579
6	303
7	517
8	1124
9	1874
10	690
11	1246
12	2891
13	170
14	2738
15	696
16	785
17	1402
18	1363
19	650
20	643
21	2676
22	2031
23	1238
24	1377
25	1159
26	532
27	1287
28	578
29	239
30	659
31	1187
32	728
33	349
34	488
35	774
36	1686
37	324
38	552
39	472
40	491
41	991
42	309
43	828
44	1602
45	1265
46	1319
47	2552
48	581
49	611
50	723
51	377
52	805
53	221
54	1217
55	630
56	297
57	454
58	1033
59	440
60	436
61	665
62	240
63	252
64	302
65	712
66	313
67	206
68	1079
69	660
70	372
71	941
72	944
73	666
74	341
75	835
76	462
77	407
78	649
79	1798
80	1867
81	2065
82	873
83	1670
84	1051
85	629
86	408
87	1606
88	546
89	1336
90	838
91	570
92	924
93	1338
94	2235
95	2076
96	603
97	1133
98	1874
99	200
100	279
101	1561
102	328
103	1987
104	445
105	627
106	317
107	278
108	661
109	907
110	432
111	250
112	529
113	991
114	2721
115	1633
116	216
117	245
118	229
119	954
120	426
121	619
122	590
123	2052
124	1505
125	535
126	675
127	636
128	226
129	2877
130	327
131	2077
132	935
133	891
134	943
135	617
136	2050
137	673
138	765
139	831
140	1854
141	1117
142	2795
143	1285
144	1731
145	987
146	272
147	697
148	603
149	1393
150	337
151	480
152	1665
153	384
154	353
155	1094
156	3431
157	669
158	811
159	1058
160	503
161	418
162	1094
163	1387
164	1262
165	624
166	512
167	796
168	780
169	132
170	180
171	1618
172	1372
173	289
174	289
175	414
176	458
177	438
178	1496
179	748
180	277
181	1186
182	1096
183	651
184	244
185	272
186	1259
187	1742
188	255
189	349
190	760
191	1676
192	1022
193	956
194	921
195	797
196	721
197	284
198	1219
199	483
200	886
201	272
202	2201
203	393
204	1012
205	1687
206	1602
207	1585
208	860
209	987
210	2705
211	2878
212	2211
213	1051
214	1128
215	1244
216	2020
217	1800
218	608
219	2088
220	3079
221	2054
222	306
223	327
224	772
225	322
226	930
227	888
228	1028
229	2984
230	2227
231	786
232	1868
233	1275
234	621
235	2021
236	2160
237	943
238	382
239	575
240	342
241	1088
242	341
243	1176
244	1443
245	4729
246	1505
247	1045
248	2371
249	2015
250	1976
251	2117
252	2659
253	687
254	1086
255	1382
256	759
257	420
258	1822
259	2226
260	1834
261	1422
262	2308
263	2766
264	1089
265	637
266	2095
267	1019
268	2472
269	2567
270	1227
271	1431
272	898
273	1298
274	1507
275	1199
276	618
277	556
278	1292
279	1409
280	1188
281	1633
282	1855
283	2238
284	245
285	274
286	924
287	1117
288	2214
289	2368
290	1626
291	1981
292	416
293	1831
294	2886
295	1630
296	2308
297	504
298	1864
299	1101
300	594
301	2495
302	1331
303	2783
304	2427
305	2652
306	672
307	1564
308	2194
309	3563
310	1182
311	688
312	1024
313	2702
314	1838
315	2384
316	1857
317	1332
318	775
319	2161
320	1146
321	1062
322	2665
323	473
324	2025
325	1673
326	2123
327	2403
328	798
329	761
330	926
331	1824
332	1036
333	1551
334	1268
335	611
336	1101
337	1094
338	517
339	953
340	251
341	1415
342	2934
343	2696
344	2618
345	2165
346	3744
347	1280
348	1913
349	1921
350	784
351	516
352	2585
353	1138
354	279
355	461
356	2018
357	417
358	1273
359	1098
360	511
361	259
362	486
363	1159
364	267
365	1562
366	611
367	510
368	1127
369	1290
370	849
371	1148
372	942
373	818
374	540
375	1111
376	1630
377	1268
378	311
379	1764
380	697
381	811
382	1107
383	671
384	351
385	1001
386	2078
387	860
388	1004
389	1033
390	421
391	1009
392	1189
393	1670
394	1843
395	2651
396	1078
397	2003
398	709
399	3519
400	757
401	2604
402	1180
403	2366
404	2729
405	1179
406	2380
407	1865
408	1199
409	1914
410	1679
411	1918
412	1266
413	2590
414	523
415	670
416	1469
417	2461
418	1914
419	710
420	1848
421	2673
422	611
423	279
424	728
425	1933
426	1018
427	410
428	1444
429	1496
430	2355
431	1511
432	1472
433	3226
434	1183
435	1238
436	1216
437	2367
438	916
439	368
440	2776
441	1775
442	1813
443	876
444	3279
445	2497
446	342
447	1769
448	1362
449	799
450	910
451	3372
452	1521
453	1142
454	954
455	2694
456	1120
457	2015
458	3670
459	1414
460	1304
461	1226
462	1144
463	214
464	1932
465	1311
466	1633
467	355
468	1785
469	1210
470	1310
471	976
472	707
473	1178
474	945
475	1245
476	1505
477	1442
478	902
479	2312
480	2453
481	2659
482	2229
483	1062
484	1927
485	915
486	1096
487	693
488	1984
489	2090
490	1415
491	1626
492	522
493	1480
494	2300
495	1843
496	1073
497	1257
498	1308
499	2215
500	1166
501	1988
502	1572
503	1340
504	2813
505	2032
506	1347
507	1241
508	1115
509	4032
510	2797
511	1430
512	1596
513	1272
514	581
515	717
516	1578
517	2009
518	1794
519	3033
520	2795
521	2710
522	983
523	1020
524	1060
525	3291
526	1737
527	810
528	1837
529	432
530	260
531	897
532	411
533	491
534	939
535	1017
536	1338
537	1243
538	1943
539	553
540	1891
541	682
542	845
543	1721
544	288
545	597
546	939
547	3408
548	2492
549	1355
550	1210
551	951
552	1731
553	1517
554	1488
555	1760
556	3022
557	1751
558	688
559	791
560	1270
561	1081
562	1523
563	2704
564	1676
565	1154
566	1264
567	1889
568	2817
569	1004
570	810
571	1502
572	2517
573	2111
574	2252
575	2258
576	2604
577	2405
578	2338
579	1143
580	829
581	1128
582	2553
583	1744
584	1829
585	1971
586	668
587	1587
588	903
589	1655
590	2399
591	2263
592	2527
593	2129
594	2065
595	2659
1	648
2	2640
3	1477
4	663
5	448
6	1727
7	856
8	559
9	3271
10	1669
11	482
12	985
13	285
14	624
15	623
16	564
17	1032
18	1189
19	1107
20	758
21	601
22	1252
23	1351
24	1402
25	759
26	592
27	1327
28	1231
29	674
30	279
31	2273
32	627
33	1350
34	1172
35	810
36	1362
37	2232
38	1435
39	1107
40	1060
41	678
42	622
43	1357
44	258
45	328
46	589
47	1130
48	778
49	1161
50	1282
51	866
52	1262
53	734
54	607
55	481
56	1633
57	543
58	845
59	1088
60	605
61	1412
62	633
63	1861
64	783
65	738
66	669
67	1111
68	2147
69	1172
70	1216
71	792
72	1518
73	979
74	191
75	731
76	1335
77	970
78	1042
79	251
80	536
81	857
82	1077
83	1264
84	910
85	2666
86	1382
87	1102
88	1795
89	1100
90	1295
91	2155
92	2371
93	629
94	1333
95	963
96	273
97	883
98	415
99	491
100	1832
101	674
102	587
103	885
104	2278
105	381
106	379
107	1021
108	496
109	401
110	258
111	575
112	882
113	1279
114	1243
115	808
116	1056
117	395
118	420
119	1050
120	652
121	1584
122	1002
123	588
124	799
125	1480
126	662
127	683
128	760
129	865
130	427
131	200
132	291
133	936
134	421
135	168
136	601
137	247
138	234
139	564
140	1935
141	1138
142	1401
143	913
144	687
145	1140
146	1209
147	793
148	669
149	1963
150	1875
151	562
152	1089
153	1593
154	1492
155	841
156	238
157	270
158	1288
159	444
160	935
161	1567
162	1028
163	901
164	692
165	829
166	1079
167	574
168	771
169	1063
170	1271
171	1074
172	846
173	1606
174	1267
175	1461
176	219
177	148
178	131
179	338
180	218
181	414
182	338
183	264
184	871
[truncated: 335 more rows]

## Sheet: Expt 6
MF-Dll4fl/fl 6	Injury and 40d regeneration
	Cross sectional Area
1	1032
2	1583
3	2160
4	1985
5	1203
6	2865
7	2123
8	1968
9	2253
10	2364
11	2302
12	2930
13	2664
14	3258
15	1606
16	2276
17	3465
18	1079
19	1328
20	2107
21	3223
22	2651
23	1672
24	1516
25	2645
26	1774
27	4023
28	1913
29	3035
30	2622
31	3632
32	2338
33	1218
34	3364
35	2851
36	2198
37	2386
38	2046
39	2756
40	3937
41	3748
42	501
43	2161
44	1630
45	3415
46	3852
47	2575
48	1911
49	4147
50	2238
51	2752
52	1646
53	2976
54	2646
55	1017
56	2221
57	3562
58	2074
59	1881
60	1497
61	1149
62	3460
63	1410
64	3027
65	2791
66	2897
67	1760
68	2609
69	2010
70	2788
71	3582
72	2487
73	2416
74	729
75	2811
76	1764
77	1631
78	2596
79	1576
80	973
81	1984
82	676
83	2647
84	2437
85	1625
86	1865
87	678
88	1791
89	1194
90	3008
91	1588
92	645
93	2885
94	1141
95	2049
96	1262
97	2470
98	1330
99	1767
100	2121
101	3049
102	1725
103	2537
104	1587
105	878
106	1567
107	4293
108	2372
109	2801
110	2227
111	1481
112	2545
113	3394
114	1402
115	922
116	2849
117	2305
118	2117
119	1375
120	1838
121	2386
122	2224
123	1314
124	879
125	1071
126	1026
127	771
128	1848
129	3216
130	3242
131	919
132	906
133	1915
134	534
135	3618
136	1246
137	1426
138	594
139	1644
140	1644
141	1175
142	2468
143	1931
144	2391
145	1215
146	1941
147	1819
148	1443
149	2787
150	3339
151	2458
152	1044
153	2178
154	1442
155	2766
156	991
157	472
158	2764
159	2708
160	2622
161	1075
162	1343
163	3497
164	3040
165	1204
166	1946
167	2122
168	1197
169	2353
170	1498
171	1553
172	2247
173	1600
174	3031
175	2560
176	1254
177	948
178	1703
179	943
180	992
181	2235
182	767
183	3539
184	630
185	1681
186	2481
187	1067
188	2693
189	1005
190	821
191	2443
192	1298
193	1766
194	634
195	2910
196	491
197	3285
198	1295
199	1504
200	2238
201	919
202	2203
203	2325
204	2049
205	2654
206	1100
207	2557
208	1897
209	1070
210	2118
211	1545
212	1213
213	1453
214	1500
215	1598
216	2432
217	1469
218	2341
219	2223
220	727
221	2937
222	542
223	2798
224	1916
225	3966
226	2441
227	4044
228	1895
229	1881
230	1390
231	2267
232	3170
233	2196
234	2088
235	2576
236	2911
237	1658
238	2599
239	978
240	1483
241	1824
242	1802
243	3038
244	1876
245	2416
246	2017
247	1187
248	2819
249	1020
250	1593
251	1014
252	1846
253	3077
254	1802
255	2967
256	1309
257	2256
258	2304
259	1352
260	2750
261	1319
262	1951
263	2428
264	492
265	1933
266	1039
267	1481
268	1264
269	1679
270	2199
271	1842
272	3664
273	2417
274	1019
275	1732
276	2579
277	2164
278	913
279	2494
280	1844
281	1952
282	1226
283	2581
284	2594
285	2786
286	1514
287	1556
288	2198
289	2475
290	2057
291	809
292	1792
293	643
294	2285
295	711
296	1975
297	3021
298	573
299	641
300	1018
301	2019
302	839
303	951
304	727
305	608
306	439
307	137
308	444
309	1839
310	270
311	335
312	840
313	586
314	110
315	137
316	147
317	2140
318	1273
319	323
320	428
321	285
322	213
323	2057
324	352
325	382
326	244
327	429
328	151
329	249
330	422
331	288
332	826
333	1074
334	1833
335	1839
336	2138
337	1847
338	281
339	803
340	462
1	886
2	1536
3	2109
4	2412
5	3374
6	2148
7	1447
8	2014
9	1227
10	1751
11	1723
12	2265
13	1214
14	1572
15	1245
16	1931
17	1541
18	1809
19	1660
20	215
21	1630
22	1323
23	2239
24	1274
25	619
26	2020
27	1282
28	1165
29	1794
30	2542
31	2687
32	1992
33	1007
34	1918
35	2058
36	1341
37	2227
38	2512
39	1127
40	793
41	1543
42	1433
43	705
44	1171
45	958
46	1904
47	1385
48	950
49	2368
50	278
51	816
52	737
53	1077
54	378
55	768
56	1016
57	1179
58	1232
59	1019
60	235
61	371
62	1547
63	1723
64	777
65	1158
66	943
67	1496
68	1477
69	496
70	1341
71	1218
72	1137
73	963
74	847
75	1150
76	1430
77	1559
78	1123
79	2390
80	1646
81	2780
82	2636
83	687
84	965
85	1813
86	1196
87	1580
88	605
89	1507
90	1678
91	1208
92	1501
93	1540
94	1441
95	1890
96	502
97	1905
98	809
99	1033
100	608
101	270
102	783
103	1128
104	406
105	1151
106	1149
107	433
108	1083
109	690
110	572
111	1822
112	1540
113	1163
114	1846
115	526
116	1019
117	823
118	1066
119	1094
120	1449
121	1614
122	214
123	109
124	225
125	1070
126	2106
127	2089
128	2855
129	1435
130	1653
131	1561
132	3302
133	2685
134	2282
135	2516
136	1653
137	675
138	1972
139	2044
140	1829
141	2073
142	889
143	870
144	467
145	1572
146	1216
147	1188
148	732
149	2174
150	2345
151	2178
152	2393
153	2024
154	1426
155	427
156	1406
157	780
158	1677
159	2068
160	1150
161	1488
162	2644
163	301
164	731
165	840
166	154
167	547
168	766
169	2141
170	1281
171	791
172	1092
173	1121
174	664
175	1340
176	785
177	1516
178	1222
179	1339
180	833
181	816
182	225
183	850
184	2045
185	1678
186	1027
187	1817
188	879
189	745
190	301
191	2249
192	1593
193	1710
194	1339
195	2008
196	1558
197	1543
198	1269
199	1301
200	943
201	1573
202	1589
203	1656
204	2000
205	1378
206	1995
207	2187
208	2905
209	2501
210	489
211	1281
212	1575
213	1236
214	1482
215	1186
216	1025
217	1197
218	1511
219	1703
220	726
221	1243
222	1615
223	1761
224	1538
225	1107
226	1501
227	363
228	146
229	230
230	897
231	1278
232	1439
233	720
234	1710
235	165
236	1107
237	638
238	64
239	144
240	571
241	191
242	1018
243	1204
244	507
245	797
246	1248
247	1774
248	957
249	1515
250	986
251	947
252	712
253	470
254	1142
255	1241
256	2604
257	939
258	1559
259	1599
260	1571
261	2438
262	2976
263	1253
264	804
265	1344
266	602
267	608
268	2079
269	2655
270	2827
271	1721
272	2087
273	1349
274	662
275	1055
276	1995
277	1713
278	2369
279	2316
280	1785
281	2113
282	2525
283	1134
284	1798
285	1277
286	1098
287	1139
288	1302
289	1663
290	981
291	987
292	1627
293	1502
294	1539
295	1306
296	1423
297	1627
298	1469
299	1550
300	1113
301	1553
302	848
303	1273
304	1957
305	1757
306	1074
307	1306
308	1822
309	2017
310	1563
311	333
312	1056
313	1360
314	477
315	194
316	529
317	184
318	583
319	728
320	1391
321	310
322	766
323	1589
324	1368
325	158
326	207
327	324
328	1285
329	673
330	1477
331	688
332	1951
333	229
334	335
335	254
336	747
337	361
338	1142
339	337
340	883
341	1225
342	393
343	629
344	1559
345	1537
346	873
347	649
348	1778
349	1545
350	1542
351	1996
352	777
353	1713
354	1933
355	2159
356	348
357	1807
358	1006
359	1309
360	1844
361	1190
1	543
2	1096
3	824
4	1861
5	266
6	1664
7	219
8	455
9	481
10	360
11	2423
12	304
13	417
14	567
15	923
16	1387
17	1013
18	1011
19	904
20	183
21	244
22	889
23	286
24	557
25	2200
26	123
27	235
28	342
29	200
30	224
31	468
32	281
33	1282
34	1198
35	2619
36	1742
37	1356
38	1047
39	324
40	297
41	1562
42	2416
43	545
44	1042
45	1808
46	589
47	1433
48	1217
49	2030
50	333
51	211
52	379
53	107
54	1040
55	987
56	1081
57	1595
58	1526
59	3071
60	1640
61	1607
62	2977
63	769
64	853
65	186
66	269
67	1885
68	2197
69	1385
70	195
71	133
72	379
73	154
74	1576
75	936
76	250
77	378
78	737
79	540
80	677
81	199
82	156
83	208
84	986
85	1013
86	502
87	1655
88	425
89	1512
90	355
91	989
92	1015
93	600
94	951
95	1269
96	763
97	1327
98	611
99	959
100	172
101	300
102	362
103	284
104	443
105	343
106	318
107	435
108	890
109	141
110	436
111	991
112	256
113	174
114	283
115	805
116	654
117	969
118	1708
119	2053
120	469
121	1767
122	1556
123	2191
124	1434
125	208
126	1524
127	1446
128	281
129	263
130	258
131	193
132	223
133	747
134	141
135	137
136	256
137	322
138	1216
139	342
140	219
141	411
142	436
143	473
144	465
145	1263
146	313
147	247
148	224
149	261
150	436
151	137
152	810
153	364
154	371
155	532
156	655
157	788
158	347
159	1194
160	408
161	422
162	1232
163	1602
164	1541
165	422
166	127
167	290
168	373
169	182
170	521
171	292
172	361
173	283
174	227
175	296
176	196
177	224
178	2159
179	4476
180	3653
181	1474
182	3935
183	1740
184	1264
185	150
186	2250
187	1268
188	419
189	778
190	834
191	445
192	245
193	346
194	663
195	1082
196	393
197	424
198	510
199	1077
200	949
201	550
202	1321
203	285
204	929
205	725
206	609
207	509
208	187
209	161
210	169
211	534
212	465
213	624
214	663
215	446
216	273
217	477
218	234
219	153
220	276
221	303
222	569
223	835
224	779
225	229
226	557
227	1252
228	661
229	764
230	431
231	128
232	1491
233	1244
234	730
235	221
236	171
237	117
238	180
239	128
240	196
241	382
242	382
243	577
244	474
245	176
246	125
247	1499
248	333
249	164
250	506
251	657
252	780
253	389
254	564
255	477
256	465
257	667
258	630
259	589
260	208
261	300
262	448
263	192
264	464
265	310
266	239
267	963
268	853
269	221
270	1004
271	500
272	883
273	829
274	997
275	630
276	131
277	125
278	231
279	804
280	1572
281	1360
282	436
283	2116
284	309
285	627
286	157
287	741
288	417
289	234
290	773
291	568
292	340
293	542
294	584
295	787
296	1137
297	341
298	478
299	1949
300	959
301	923
302	409
303	1397
304	1778
305	338
306	624
307	761
308	305
309	613
310	788
311	330
312	546
313	163
314	512
315	222
316	732
317	910
318	227
319	1305
320	1390
321	622
322	532
323	480
324	999
325	763
326	1216
327	168
328	714
329	744
330	966
331	355
332	1035
333	164
334	1022
335	814
336	860
337	1289
338	1238
339	237
340	1265
341	233
342	846
343	287
344	348
345	831
346	183
347	705
348	214
349	131
350	329
351	510
352	167
353	576
354	279
355	140
356	152
357	271
358	2180
359	203
360	330
361	1078
362	499
363	540
364	305
365	1363
366	1042
367	934
368	839
369	285
370	1109
371	1169
372	1096
373	773
374	354
375	660
376	496
377	768
378	1722
379	1170
380	1663
381	862
382	386
383	156
384	164
385	2013
386	1941
387	1007
388	1633
389	1791
390	852
391	1259
392	1329
393	1306
394	996
395	432
396	317
397	667
398	493
399	921
400	532
401	3059
402	594
403	779
404	2911
405	2731
406	1852
407	2565
408	1598
409	1614
410	2581
411	1336
412	2742
413	693
414	473
415	1021
416	865
417	823
418	1111
419	2016
420	1268
421	887
422	805
423	428
424	930
425	733
426	1352
427	1098
428	689
429	620
430	991
431	917
432	169
433	260
434	784
435	717
436	897
437	1286
438	814
439	880
440	1258
441	722
442	529
443	1229
1	1698
2	408
3	1848
4	1672
5	435
6	144
7	679
8	829
9	1732
10	3543
11	724
12	1192
13	941
14	185
15	305
16	124
17	177
18	1420
19	96
20	166
21	172
22	179
23	433
24	807
25	470
26	958
27	1959
28	2309
29	608
30	1567
31	392
32	229
33	1397
34	99
35	258
36	1007
37	270
38	984
39	1378
40	240
41	612
42	657
43	1099
44	273
45	541
46	127
47	64
48	1149
49	1644
50	135
51	463
52	386
53	761
54	123
55	292
56	426
57	843
58	633
59	739
60	1321
61	284
62	689
63	358
64	1182
65	1271
66	1822
67	2115
68	2143
69	1655
70	2249
71	1254
72	2047
73	282
74	458
75	376
76	132
77	2089
78	1498
79	366
80	591
81	752
82	1792
83	1253
84	231
85	1742
86	1249
87	389
88	409
89	757
90	1746
91	786
92	1449
93	1608
94	152
95	1150
96	1537
97	1040
98	1432
99	1187
100	494
101	565
102	166
103	444
104	485
105	220
106	262
107	1194
108	1267
109	599
110	456
111	439
112	310
113	1670
114	2729
115	979
116	1268
117	647
118	210
119	262
120	689
121	855
122	186
123	485
124	399
125	1115
126	1021
127	905
128	1530
129	222
130	346
131	369
132	154
133	88
134	745
135	290
136	399
137	720
138	932
139	287
140	273
141	117
142	159
143	502
144	665
145	134
146	135
147	635
148	1849
149	2267
150	1725
151	1037
152	336
153	564
154	654
155	313
156	343
157	1239
158	1962
159	1522
160	2072
161	876
162	713
163	487
164	116
165	189
166	280
167	433
168	1212
169	831
170	690
171	596
172	1410
173	356
174	479
175	81
176	510
177	131
178	323
179	1663
180	930
181	858
182	555
183	845
184	1814
185	644
186	1076
187	1121
188	1703
189	818
190	1340
191	2134
192	827
193	1600
194	1969
195	465
196	1716
197	396
198	271
199	459
200	633
201	421
202	1556
203	1117
204	876
205	251
206	649
207	448
208	210
209	435
210	616
211	400
212	1076
213	820
214	931
215	138
216	368
217	869
218	302
219	803
220	254
221	990
222	1113
223	159
224	578
225	999
226	329
227	806
228	420
229	1577
230	2700
231	1117
232	202
233	223
234	444
235	387
236	962
237	460
238	164
239	301
240	1540
241	1763
242	1642
243	686
244	358
245	623
246	485
247	593
248	1218
249	1494
250	1165
251	1235
252	520
253	591
254	251
255	425
256	525
257	599
258	582
259	551
260	194
261	365
262	975
263	703
264	1101
265	1418
266	875
267	1734
268	1384
269	670
270	611
271	403
272	215
273	845
274	545
275	592
276	376
277	1568
278	664
279	259
280	415
281	774
282	175
283	818
284	1136
285	421
286	522
287	1194
288	1294
289	1194
290	1095
291	2555
292	1203
293	1128
294	1096
295	590
296	178
297	368
298	393
299	1878
300	953
301	346
302	270
303	736
304	1532
305	539
306	209
307	397
308	308
309	2457
310	478
311	341
312	404
313	657
314	726
315	1101
316	707
317	274
318	1747
319	1813
320	507
321	150
322	136
323	213
324	1096
325	2663
326	2069
327	1558
328	476
329	1996
330	555
331	279
332	316
333	1222
334	976
335	464
336	1964
337	394
338	763
339	1690
340	955
341	965
342	1872
343	892
344	2924
345	1837
346	1522
347	1774
348	1012
349	565
350	510
351	128
352	404
353	1679
354	2155
355	676
356	1869
357	1802
358	1804
359	1028
360	1433
361	1776
362	263
363	245
364	629
365	1600
366	1550
367	1689
368	534
369	567
370	700
371	1472
372	1869
373	540
374	472
375	759
376	738
377	1908
378	785
379	307
380	815
381	940
382	325
383	263
384	237
385	330
386	1284
387	1818
388	1356
389	1057
390	242
391	918
392	770
393	690
394	1461
395	1090
396	789
397	992
398	1114
399	381
400	258
401	1132
402	753
403	958
404	293
405	1069
406	1219
407	812
408	218
409	1390
410	1268
411	1419
412	1326
413	1490
414	300
415	634
416	883
417	954
418	97
419	1757
420	602
421	1771
422	190
423	1602
424	529
425	632
426	1746
427	1739
428	508
429	499
1	463
2	226
3	316
4	318
5	612
6	386
7	276
8	1178
9	624
10	598
11	314
12	351
13	2150
14	1652
15	1673
16	476
17	904
18	1932
19	187
20	496
21	573
22	597
23	111
24	394
25	515
26	777
27	877
28	437
29	485
30	516
31	402
32	262
33	522
34	1703
35	574
36	361
37	873
38	1462
39	697
40	227
41	270
42	427
43	316
44	176
45	1706
46	1315
47	1408
48	1092
49	2438
50	779
51	529
52	346
53	605
54	780
55	785
56	632
57	769
58	705
59	252
60	593
61	398
62	1142
63	816
64	472
65	1680
66	1188
67	1197
68	378
69	751
70	135
71	695
72	2034
73	1748
74	616
75	892
76	1289
77	1233
78	196
79	617
80	1192
81	1054
82	845
83	291
84	589
85	1379
86	528
87	705
88	830
89	402
90	295
91	326
92	1956
93	823
94	759
95	930
96	889
97	369
98	787
99	801
100	387
101	128
102	489
103	2451
104	480
105	1052
106	706
107	179
108	751
109	443
110	370
111	596
112	195
113	513
114	321
115	470
116	376
117	565
118	620
119	300
120	217
121	71
122	425
123	114
124	134
125	143
126	431
127	1059
128	288
129	308
130	1262
131	305
132	370
133	457
134	148
135	97
136	160
137	289
138	1052
139	521
140	573
141	1308
142	203
143	450
144	528
145	711
146	829
147	87
148	315
149	686
150	374
151	2096
152	387
153	264
154	1159
155	297
156	206
157	194
158	551
159	210
160	293
161	194
162	875
163	1302
164	125
165	432
166	204
167	118
168	226
169	203
170	119
171	952
172	965
173	576
174	287
175	1487
176	476
177	390
178	344
179	431
180	502
181	260
182	113
183	161
184	194
185	338
186	850
187	1518
188	289
189	532
190	329
191	162
192	339
193	476
194	341
195	215
196	535
197	1076
198	1804
199	248
200	507
201	1199
202	986
203	572
204	530
205	439
206	420
207	342
208	174
209	473
210	465
211	201
212	148
213	390
214	1206
215	442
216	278
217	473
218	317
219	510
220	600
221	845
222	819
223	1423
224	702
225	604
226	1034
227	234
228	435
229	1122
230	758
231	491
232	225
233	300
234	916
235	1138
236	613
237	930
238	564
239	532
240	391
241	369
242	186
243	425
244	241
245	611
246	1138
247	744
248	654
249	1563
