# Supplementary material for: Heterogeneous levels of delta-like 4 within a multinucleated niche cell maintains muscle stem cell diversity
Source: eLife. 2022 Dec 30;11:e68180. doi: 10.7554/eLife.68180 (PMC9803355; doi:10.7554/eLife.68180)
Supplement: Figure 6—source data 1. [file elife-68180-fig6-data1.xlsx]

## Sheet: WT_042820
		in Fibers			in SCs
Item	Source	Mib1 (green) Intensity			Pax7 (red) Intensity
1	SUM_WT_Mib1 expression_Series013_Mib1.tif	13.76			162.73
2	SUM_WT_Mib1 expression_Series018_Mib1.tif	46.9			242.13
3	SUM_WT_Mib1 expression_Series021_Mib1.tif	101.57			273.44
4	SUM_WT_Mib1 expression_Series024_Mib1.tif	122.49			370.62
5	SUM_WT_Mib1 expression_Series035_Mib1.tif	98.78			286.83
6	SUM_WT_Mib1 expression_Series038_Mib1.tif	44.54			253.14
7	SUM_WT_Mib1 expression_Series043_Mib1.tif	82.75			229.58
8	SUM_WT_Mib1 expression_Series046_Mib1.tif	90.67			179.79
9	SUM_WT_Mib1 expression_Series049_Mib1.tif	155.31			250.93
10	SUM_WT_Mib1 expression_Series052_Mib1.tif	95.96			350
11	SUM_WT_Mib1 expression_Series056_Mib1.tif	102.55			299.24
12	SUM_WT_Mib1 expression_Series059_Mib1.tif	112.92			229.88

## Sheet: Ctrl5_041420
		in Fibers			in SCs
Item	Source	Mib1 (green) Intensity			Pax7 (red) Intensity
1	SUM_mCre-Mib1_Ctrl5_Mib1 stain_041420_Series008_Mib1.tif	114.98			498.47
2	SUM_mCre-Mib1_Ctrl5_Mib1 stain_041420_Series014_Mib1.tif	136.84			448.42
3	SUM_mCre-Mib1_Ctrl5_Mib1 stain_041420_Series018_Mib1.tif	92.22			400
4	SUM_mCre-Mib1_Ctrl5_Mib1 stain_041420_Series025_Mib1.tif	79.79			229.18
5	SUM_mCre-Mib1_Ctrl5_Mib1 stain_041420_Series030_Mib1.tif	89.62			261.95
6	SUM_mCre-Mib1_Ctrl5_Mib1 stain_041420_Series035_Mib1.tif	111.8			300
7	SUM_mCre-Mib1_Ctrl5_Mib1 stain_041420_Series039_Mib1.tif	80.89			226.5
8	SUM_mCre-Mib1_Ctrl5_Mib1 stain_041420_Series044_Mib1.tif	71.15			171.01
9	SUM_mCre-Mib1_Ctrl5_Mib1 stain_041420_Series048_Mib1.tif	86.69			235.55
10	SUM_mCre-Mib1_Ctrl5_Mib1 stain_041420_Series052_Mib1.tif	73.61			350
11	SUM_mCre-Mib1_Ctrl5_Mib1 stain_041420_Series057_Mib1.tif	77.76			203.98
12	SUM_mCre-Mib1_Ctrl5_Mib1 stain_041420_Series061_Mib1.tif	76.6			227
13	SUM_mCre-Mib1_Ctrl5_Mib1 stain_041420_Series071_Mib1.tif	64.78			300
14	SUM_mCre-Mib1_Ctrl5_Mib1 stain_041420_Series079_Mib1.tif	66.23			300
15	SUM_mCre-Mib1_Ctrl5_Mib1 stain_041420_Series083_Mib1.tif	70.86			210.45
16	SUM_mCre-Mib1_Ctrl5_Mib1 stain_041420_Series089_Mib1.tif	14.05			133
17	SUM_mCre-Mib1_Ctrl5_Mib1 stain_041420_Series095_Mib1.tif	20.35			179.47
18	SUM_mCre-Mib1_Ctrl5_Mib1 stain_041420_Series099_Mib1.tif	26.43			100
19	SUM_mCre-Mib1_Ctrl5_Mib1 stain_041420_Series103_Mib1.tif	25.69			150
20	SUM_mCre-Mib1_Ctrl5_Mib1 stain_041420_Series108_Mib1.tif	26.1			132.51
21	SUM_mCre-Mib1_Ctrl5_Mib1 stain_041420_Series112_Mib1.tif	13.83			141.06
22	SUM_mCre-Mib1_Ctrl5_Mib1 stain_041420_Series116_Mib1.tif	23.74			100
23	SUM_mCre-Mib1_Ctrl5_Mib1 stain_041420_Series120_Mib1.tif	14.73			142.71
24	SUM_mCre-Mib1_Ctrl5_Mib1 stain_041420_Series124_Mib1.tif	25.49			177.03
25	SUM_mCre-Mib1_Ctrl5_Mib1 stain_041420_Series129_Mib1.tif	11.13			139.57
26	SUM_mCre-Mib1_Ctrl5_Mib1 stain_041420_Series134_Mib1.tif	14.95			161.37
27	SUM_mCre-Mib1_Ctrl5_Mib1 stain_041420_Series138_Mib1.tif	15.31			174.73

## Sheet: Ctrl8_041420
		in Fibers			in SCs
Item	Source	Mib1 (green) Intensity			Pax7 (red) Intensity
1	SUM_mCre-Mib1_Ctrl8_Mib1 stain_041420_Series008_Mib1.tif	78.41			167.58
2	SUM_mCre-Mib1_Ctrl8_Mib1 stain_041420_Series012_Mib1.tif	57.64			119.8
3	SUM_mCre-Mib1_Ctrl8_Mib1 stain_041420_Series022_Mib1.tif	26.81			82.49
4	SUM_mCre-Mib1_Ctrl8_Mib1 stain_041420_Series028_Mib1.tif	54.14			149.05
5	SUM_mCre-Mib1_Ctrl8_Mib1 stain_041420_Series033_Mib1.tif	33.16			165.85
6	SUM_mCre-Mib1_Ctrl8_Mib1 stain_041420_Series037_Mib1.tif	29.69			155.11
7	SUM_mCre-Mib1_Ctrl8_Mib1 stain_041420_Series043_Mib1.tif	29.44			163.16
8	SUM_mCre-Mib1_Ctrl8_Mib1 stain_041420_Series049_Mib1.tif	28.38			221.52
9	SUM_mCre-Mib1_Ctrl8_Mib1 stain_041420_Series054_Mib1.tif	61.61			268.82
10	SUM_mCre-Mib1_Ctrl8_Mib1 stain_041420_Series060_Mib1.tif	38.56			209.8
11	SUM_mCre-Mib1_Ctrl8_Mib1 stain_041420_Series065_Mib1.tif	19.38			182.25
12	SUM_mCre-Mib1_Ctrl8_Mib1 stain_041420_Series071_Mib1.tif	30.18			156.04
13	SUM_mCre-Mib1_Ctrl8_Mib1 stain_041420_Series075_Mib1.tif	13.39			144.53
14	SUM_mCre-Mib1_Ctrl8_Mib1 stain_041420_Series079_Mib1.tif	27.49			166.71
15	SUM_mCre-Mib1_Ctrl8_Mib1 stain_041420_Series085_Mib1.tif	13.1			125.72
16	SUM_mCre-Mib1_Ctrl8_Mib1 stain_041420_Series089_Mib1.tif	38.27			188.66
17	SUM_mCre-Mib1_Ctrl8_Mib1 stain_041420_Series095_Mib1.tif	15.34			130.46
18	SUM_mCre-Mib1_Ctrl8_Mib1 stain_041420_Series100_Mib1.tif	52.73			158.16
19	SUM_mCre-Mib1_Ctrl8_Mib1 stain_041420_Series105_Mib1.tif	25.79			193.92
20	SUM_mCre-Mib1_Ctrl8_Mib1 stain_041420_Series115_Mib1.tif	13.72			153.44
21	SUM_mCre-Mib1_Ctrl8_Mib1 stain_041420_Series119_Mib1.tif	12.96			163.77
22	SUM_mCre-Mib1_Ctrl8_Mib1 stain_041420_Series123_Mib1.tif	18.97			176.65
23	SUM_mCre-Mib1_Ctrl8_Mib1 stain_041420_Series130_Mib1.tif	20.76			100
24	SUM_mCre-Mib1_Ctrl8_Mib1 stain_041420_Series135_Mib1.tif	24.34			156.09
25	SUM_mCre-Mib1_Ctrl8_Mib1 stain_041420_Series139_Mib1.tif	21.81			186.42
26	SUM_mCre-Mib1_Ctrl8_Mib1 stain_041420_Series144_Mib1.tif	35.42			167.2
27	SUM_mCre-Mib1_Ctrl8_Mib1 stain_041420_Series154_Mib1.tif	21.51			153.05
28	SUM_mCre-Mib1_Ctrl8_Mib1 stain_041420_Series159_Mib1.tif	16.06			153.28
29	SUM_mCre-Mib1_Ctrl8_Mib1 stain_041420_Series163_Mib1.tif	20.61			193.41

## Sheet: Ctrl3_031020
		in Fibers			in SCs
Item	Source	Mib1 (green) Intensity			Pax7 (red) Intensity
1	SUM_mCre-Mib1_Ctrl3_Series003_Mib1.tif	69.95			196.61
2	SUM_mCre-Mib1_Ctrl3_Series006_Mib1.tif	124.5			350
3	SUM_mCre-Mib1_Ctrl3_Series010_Mib1.tif	47.29			200
4	SUM_mCre-Mib1_Ctrl3_Series013_Mib1.tif	76.98			300
5	SUM_mCre-Mib1_Ctrl3_Series016_Mib1.tif	69.61			185.43

## Sheet: Ctrl6-1_031020
		in Fibers			in SCs
Item	Source	Mib1 (green) Intensity			Pax7 (red) Intensity
1	SUM_mCre-Mib1_Ctrl6-1_Series004_Mib1.tif	18.91			187.73
2	SUM_mCre-Mib1_Ctrl6-1_Series008_Mib1.tif	19.86			194.81
3	SUM_mCre-Mib1_Ctrl6-1_Series011_Mib1.tif	33.29			100
4	SUM_mCre-Mib1_Ctrl6-1_Series015_Mib1.tif	36.57			234.31
5	SUM_mCre-Mib1_Ctrl6-1_Series018_Mib1.tif	72.01			226.71
6	SUM_mCre-Mib1_Ctrl6-1_Series022_Mib1.tif	32.62			100
7	SUM_mCre-Mib1_Ctrl6-1_Series029_Mib1.tif	27.44			126.06
8	SUM_mCre-Mib1_Ctrl6-1_Series032_Mib1.tif	48.75			165.73
9	SUM_mCre-Mib1_Ctrl6-1_Series035_Mib1.tif	77.06			267.15
10	SUM_mCre-Mib1_Ctrl6-1_Series040_Mib1.tif	48.58			202.59
11	SUM_mCre-Mib1_Ctrl6-1_Series043_Mib1.tif	45.26			184.07
12	SUM_mCre-Mib1_Ctrl6-1_Series046_Mib1.tif	54.92			177.5
13	SUM_mCre-Mib1_Ctrl6-1_Series049_Mib1.tif	32.23			150.77
