# Supplementary material for: Heterogeneous levels of delta-like 4 within a multinucleated niche cell maintains muscle stem cell diversity
Source: eLife. 2022 Dec 30;11:e68180. doi: 10.7554/eLife.68180 (PMC9803355; doi:10.7554/eLife.68180)
Supplement: Figure 6—source data 3. [file elife-68180-fig6-data3.xlsx]

## Sheet: Ctrl1_040820
Item	Source	Pax7 (Cy5) mean intensity	Cy5 channel background	Pax7 mean intensity	Corrected minus to zeros
1	C1_30d p tmx_Pax7-030.nd2	1765.9	1025.53	740.37	740.37
2	C1_30d p tmx_Pax7-030.nd2	1530.07	571.03	959.04	959.04
3	C1_30d p tmx_Pax7-029.nd2	1297.71	476.72	820.99	820.99
4	C1_30d p tmx_Pax7-028.nd2	2154.13	1259.38	894.75	894.75
5	C1_30d p tmx_Pax7-027.nd2	476.57	294.27	182.3	182.3
6	C1_30d p tmx_Pax7-027.nd2	391.17	185.99	205.18	205.18
7	C1_30d p tmx_Pax7-026.nd2	693.58	305.18	388.4	388.4
8	C1_30d p tmx_Pax7-026.nd2	526.36	215.14	311.22	311.22
9	C1_30d p tmx_Pax7-026.nd2	519.8	208.07	311.73	311.73
10	C1_30d p tmx_Pax7-026.nd2	485.74	219.33	266.41	266.41
11	C1_30d p tmx_Pax7-025.nd2	560.32	233	327.32	327.32
12	C1_30d p tmx_Pax7-025.nd2	554.81	217.79	337.02	337.02
13	C1_30d p tmx_Pax7-025.nd2	552.18	237.04	315.14	315.14
14	C1_30d p tmx_Pax7-023.nd2	824.96	423.68	401.28	401.28
15	C1_30d p tmx_Pax7-023.nd2	826.22	338.76	487.46	487.46
16	C1_30d p tmx_Pax7-023.nd2	625.41	359.7	265.71	265.71
17	C1_30d p tmx_Pax7-022.nd2	533.07	239.14	293.93	293.93
18	C1_30d p tmx_Pax7-022.nd2	1146.3	579.15	567.15	567.15
19	C1_30d p tmx_Pax7-021.nd2	902.34	346.25	556.09	556.09
20	C1_30d p tmx_Pax7-021.nd2	1099.77	404.11	695.66	695.66
21	C1_30d p tmx_Pax7-021.nd2	653.49	302.47	351.02	351.02
22	C1_30d p tmx_Pax7-021.nd2	1004.82	344.38	660.44	660.44
23	C1_30d p tmx_Pax7-021.nd2	752.89	407.45	345.44	345.44
24	C1_30d p tmx_Pax7-021.nd2	809.18	454.45	354.73	354.73
25	C1_30d p tmx_Pax7-020.nd2	708.54	322.33	386.21	386.21
26	C1_30d p tmx_Pax7-019.nd2	546.12	449.11	97.01	97.01
27	C1_30d p tmx_Pax7-019.nd2	539.76	389.06	150.7	150.7
28	C1_30d p tmx_Pax7-019.nd2	429.28	248.07	181.21	181.21
29	C1_30d p tmx_Pax7-019.nd2	465.56	251.78	213.78	213.78
30	C1_30d p tmx_Pax7-019.nd2	439.39	301.48	137.91	137.91
31	C1_30d p tmx_Pax7-019.nd2	352.7	253.67	99.03	99.03
32	C1_30d p tmx_Pax7-018.nd2	603.08	325.81	277.27	277.27
33	C1_30d p tmx_Pax7-018.nd2	544.63	297.96	246.67	246.67
34	C1_30d p tmx_Pax7-017.nd2	1054.07	401.37	652.7	652.7
35	C1_30d p tmx_Pax7-017.nd2	674.98	348.64	326.34	326.34
36	C1_30d p tmx_Pax7-016.nd2	552.79	261.57	291.22	291.22
37	C1_30d p tmx_Pax7-016.nd2	858.32	288.13	570.19	570.19
38	C1_30d p tmx_Pax7-016.nd2	759.47	291.21	468.26	468.26
39	C1_30d p tmx_Pax7-016.nd2	733.69	278.14	455.55	455.55
40	C1_30d p tmx_Pax7-016.nd2	881.76	288.01	593.75	593.75
41	C1_30d p tmx_Pax7-016.nd2	706.27	395.24	311.03	311.03
42	C1_30d p tmx_Pax7-016.nd2	1006.19	265.38	740.81	740.81
43	C1_30d p tmx_Pax7-015.nd2	803.56	271.21	532.35	532.35
44	C1_30d p tmx_Pax7-015.nd2	603.14	390.67	212.47	212.47
45	C1_30d p tmx_Pax7-015.nd2	810.23	324.73	485.5	485.5
46	C1_30d p tmx_Pax7-014.nd2	555.82	229.98	325.84	325.84
47	C1_30d p tmx_Pax7-014.nd2	487.04	200.38	286.66	286.66
48	C1_30d p tmx_Pax7-014.nd2	371.86	209.63	162.23	162.23
49	C1_30d p tmx_Pax7-013.nd2	859.51	288.51	571	571
50	C1_30d p tmx_Pax7-013.nd2	397.29	263.42	133.87	133.87
51	C1_30d p tmx_Pax7-013.nd2	715.86	247.02	468.84	468.84
52	C1_30d p tmx_Pax7-013.nd2	664.49	326.72	337.77	337.77
53	C1_30d p tmx_Pax7-011.nd2	688.17	311.58	376.59	376.59
54	C1_30d p tmx_Pax7-011.nd2	705.56	323.76	381.8	381.8
55	C1_30d p tmx_Pax7-011.nd2	640.99	377.83	263.16	263.16
56	C1_30d p tmx_Pax7-011.nd2	721.15	301.08	420.07	420.07
57	C1_30d p tmx_Pax7-011.nd2	952.55	597.53	355.02	355.02
58	C1_30d p tmx_Pax7-010.nd2	605.16	288.6	316.56	316.56
59	C1_30d p tmx_Pax7-010.nd2	836.39	373.68	462.71	462.71
60	C1_30d p tmx_Pax7-010.nd2	482.7	295.77	186.93	186.93
61	C1_30d p tmx_Pax7-009.nd2	758.35	447.66	310.69	310.69
62	C1_30d p tmx_Pax7-008.nd2	728.69	478.32	250.37	250.37
63	C1_30d p tmx_Pax7-007.nd2	1715.47	877.85	837.62	837.62
64	C1_30d p tmx_Pax7-007.nd2	983.79	446.03	537.76	537.76
65	C1_30d p tmx_Pax7-007.nd2	670.44	366.03	304.41	304.41
66	C1_30d p tmx_Pax7-006.nd2	1285.91	670.36	615.55	615.55
67	C1_30d p tmx_Pax7-006.nd2	489.25	308.65	180.6	180.6
68	C1_30d p tmx_Pax7-005.nd2	1125.81	563.6	562.21	562.21
69	C1_30d p tmx_Pax7-005.nd2	879.99	399.38	480.61	480.61
70	C1_30d p tmx_Pax7-005.nd2	1466.81	491.81	975	975
71	C1_30d p tmx_Pax7-003.nd2	1431.02	722.78	708.24	708.24
72	C1_30d p tmx_Pax7-003.nd2	754.82	410.06	344.76	344.76
73	C1_30d p tmx_Pax7-002.nd2	1063.3	570.27	493.03	493.03
74	C1_30d p tmx_Pax7-002.nd2	645.22	378.37	266.85	266.85
75	C1_30d p tmx_Pax7-002.nd2	709.46	355.21	354.25	354.25
76	C1_30d p tmx_Pax7-002.nd2	1168.6	582.91	585.69	585.69
77	C1_30d p tmx_Pax7-001.nd2	996.77	681.4	315.37	315.37
78	C1_30d p tmx_Pax7-040.nd2	1198.7	370.63	828.07	828.07
79	C1_30d p tmx_Pax7-040.nd2	1115.45	660.23	455.22	455.22
80	C1_30d p tmx_Pax7-040.nd2	928.97	433.89	495.08	495.08
81	C1_30d p tmx_Pax7-039.nd2	1018.76	368.19	650.57	650.57
82	C1_30d p tmx_Pax7-039.nd2	1736.23	520.17	1216.06	1216.06
83	C1_30d p tmx_Pax7-039.nd2	816.8	409.27	407.53	407.53
84	C1_30d p tmx_Pax7-039.nd2	1086	491.53	594.47	594.47
85	C1_30d p tmx_Pax7-038.nd2	893.55	471	422.55	422.55
86	C1_30d p tmx_Pax7-038.nd2	890.1	435.29	454.81	454.81
87	C1_30d p tmx_Pax7-038.nd2	769.77	398.27	371.5	371.5
88	C1_30d p tmx_Pax7-037.nd2	974.23	357	617.23	617.23
89	C1_30d p tmx_Pax7-036.nd2	617.25	416.44	200.81	200.81
90	C1_30d p tmx_Pax7-036.nd2	624.44	351.29	273.15	273.15
91	C1_30d p tmx_Pax7-036.nd2	485.26	294.26	191	191
92	C1_30d p tmx_Pax7-035.nd2	1233.7	496.72	736.98	736.98
93	C1_30d p tmx_Pax7-035.nd2	794.06	516.83	277.23	277.23
94	C1_30d p tmx_Pax7-035.nd2	1304.35	603.3	701.05	701.05
95	C1_30d p tmx_Pax7-034.nd2	1515.67	656.37	859.3	859.3
96	C1_30d p tmx_Pax7-034.nd2	1517.8	664.6	853.2	853.2
97	C1_30d p tmx_Pax7-034.nd2	1752.17	455.44	1296.73	1296.73
98	C1_30d p tmx_Pax7-034.nd2	1308.13	526.16	781.97	781.97
99	C1_30d p tmx_Pax7-034.nd2	915.24	534.24	381	381
100	C1_30d p tmx_Pax7-033.nd2	1095.07	593.3	501.77	501.77
101	C1_30d p tmx_Pax7-033.nd2	1398.74	517.94	880.8	880.8
102	C1_30d p tmx_Pax7-032.nd2	1570.76	1134.28	436.48	436.48
103	C1_30d p tmx_Pax7-032.nd2	1101.04	827.52	273.52	273.52
104	C1_30d p tmx_Pax7-031.nd2	1865.05	1002.98	862.07	862.07
105	C1_30d p tmx_Pax7-031.nd2	1393.22	561.96	831.26	831.26

## Sheet: Ctrl2_040820
Item	Source	Pax7 (Cy5) mean intensity	Cy5 channel background	Pax7 mean intensity	Corrected minus to zeros
1	C2_30d p tmx_Pax7-030.nd2	1719.97	452.66	1267.31	1719.97
2	C2_30d p tmx_Pax7-030.nd2	1029.5	428.92	600.58	600.58
3	C2_30d p tmx_Pax7-029.nd2	1198.67	563.4	635.27	635.27
4	C2_30d p tmx_Pax7-028.nd2	563.27	449.97	113.3	113.3
5	C2_30d p tmx_Pax7-028.nd2	435.61	304.15	131.46	131.46
6	C2_30d p tmx_Pax7-027.nd2	1278.43	471	807.43	807.43
7	C2_30d p tmx_Pax7-027.nd2	731.66	350.3	381.36	381.36
8	C2_30d p tmx_Pax7-027.nd2	540.9	391.48	149.42	149.42
9	C2_30d p tmx_Pax7-026.nd2	1084.53	278.89	805.64	805.64
10	C2_30d p tmx_Pax7-026.nd2	395.11	233.55	161.56	161.56
11	C2_30d p tmx_Pax7-025.nd2	541.9	265.37	276.53	276.53
12	C2_30d p tmx_Pax7-025.nd2	907.42	239.19	668.23	668.23
13	C2_30d p tmx_Pax7-024.nd2	1036.93	396.17	640.76	640.76
14	C2_30d p tmx_Pax7-023.nd2	1053	765.16	287.84	287.84
15	C2_30d p tmx_Pax7-023.nd2	943.5	554.16	389.34	389.34
16	C2_30d p tmx_Pax7-022.nd2	511.23	319.3	191.93	191.93
17	C2_30d p tmx_Pax7-022.nd2	864.01	516.19	347.82	347.82
18	C2_30d p tmx_Pax7-022.nd2	439.62	316.66	122.96	122.96
19	C2_30d p tmx_Pax7-021.nd2	1245.9	332.33	913.57	1245.9
20	C2_30d p tmx_Pax7-020.nd2	1136.27	378.93	757.34	1136.27
21	C2_30d p tmx_Pax7-020.nd2	1090.48	526.26	564.22	1090.48
22	C2_30d p tmx_Pax7-019.nd2	1299.29	583.22	716.07	1299.29
23	C2_30d p tmx_Pax7-019.nd2	937.09	594.14	342.95	937.09
24	C2_30d p tmx_Pax7-018.nd2	707.52	433.82	273.7	707.52
25	C2_30d p tmx_Pax7-017.nd2	1640.97	565.9	1075.07	1640.97
26	C2_30d p tmx_Pax7-017.nd2	776.08	438.1	337.98	776.08
27	C2_30d p tmx_Pax7-017.nd2	1414.1	586.76	827.34	1414.1
28	C2_30d p tmx_Pax7-016.nd2	659.91	453.06	206.85	659.91
29	C2_30d p tmx_Pax7-016.nd2	1017.32	772.07	245.25	245.25
30	C2_30d p tmx_Pax7-016.nd2	1737.99	692.54	1045.45	1045.45
31	C2_30d p tmx_Pax7-015.nd2	1374.1	518.22	855.88	855.88
32	C2_30d p tmx_Pax7-015.nd2	1859.68	588.79	1270.89	1270.89
33	C2_30d p tmx_Pax7-015.nd2	1757	561.76	1195.24	1195.24
34	C2_30d p tmx_Pax7-014.nd2	1222.86	461.86	761	761
35	C2_30d p tmx_Pax7-014.nd2	700.02	438.73	261.29	261.29
36	C2_30d p tmx_Pax7-013.nd2	1282.4	499.14	783.26	783.26
37	C2_30d p tmx_Pax7-012.nd2	1375.82	499	876.82	876.82
38	C2_30d p tmx_Pax7-012.nd2	678.41	381.17	297.24	297.24
39	C2_30d p tmx_Pax7-012.nd2	528.62	331.35	197.27	197.27
40	C2_30d p tmx_Pax7-011.nd2	500.42	316.12	184.3	184.3
41	C2_30d p tmx_Pax7-011.nd2	1241.59	367.68	873.91	873.91
42	C2_30d p tmx_Pax7-010.nd2	1835.59	690.62	1144.97	1144.97
43	C2_30d p tmx_Pax7-009.nd2	1052.79	541	511.79	511.79
44	C2_30d p tmx_Pax7-009.nd2	760.04	413.09	346.95	346.95
45	C2_30d p tmx_Pax7-008.nd2	1339.41	431.19	908.22	908.22
46	C2_30d p tmx_Pax7-008.nd2	1469.95	676.41	793.54	793.54
47	C2_30d p tmx_Pax7-007.nd2	1666.99	591.87	1075.12	1075.12
48	C2_30d p tmx_Pax7-007.nd2	989.59	536.39	453.2	453.2
49	C2_30d p tmx_Pax7-006.nd2	980.45	446.28	534.17	534.17
50	C2_30d p tmx_Pax7-006.nd2	1181.59	413.01	768.58	768.58
51	C2_30d p tmx_Pax7-005.nd2	829.81	294.77	535.04	535.04
52	C2_30d p tmx_Pax7-004.nd2	1219.18	351	868.18	868.18
53	C2_30d p tmx_Pax7-003.nd2	1043.15	382.03	661.12	661.12
54	C2_30d p tmx_Pax7-003.nd2	1276.84	490.35	786.49	786.49
55	C2_30d p tmx_Pax7-003.nd2	1150.75	570.75	580	580
56	C2_30d p tmx_Pax7-002.nd2	517.17	336.91	180.26	180.26
57	C2_30d p tmx_Pax7-001.nd2	468.16	209.49	258.67	258.67
58	C2_30d p tmx_Pax7-043.nd2	1427.24	658.54	768.7	768.7
59	C2_30d p tmx_Pax7-043.nd2	1404.51	796.2	608.31	608.31
60	C2_30d p tmx_Pax7-043.nd2	638.26	427.86	210.4	210.4
61	C2_30d p tmx_Pax7-042.nd2	1463.06	707.47	755.59	755.59
62	C2_30d p tmx_Pax7-041.nd2	1317.54	714.56	602.98	602.98
63	C2_30d p tmx_Pax7-041.nd2	982.75	460.44	522.31	522.31
64	C2_30d p tmx_Pax7-040.nd2	1312.89	708.42	604.47	604.47
65	C2_30d p tmx_Pax7-040.nd2	590.53	437.84	152.69	152.69
66	C2_30d p tmx_Pax7-039.nd2	1517.8	708.32	809.48	809.48
67	C2_30d p tmx_Pax7-039.nd2	1280.19	532.37	747.82	747.82
68	C2_30d p tmx_Pax7-038.nd2	1435.99	374.54	1061.45	1061.45
69	C2_30d p tmx_Pax7-038.nd2	765.96	355.47	410.49	410.49
70	C2_30d p tmx_Pax7-038.nd2	444.13	311.8	132.33	132.33
71	C2_30d p tmx_Pax7-038.nd2	1416.36	506.33	910.03	910.03
72	C2_30d p tmx_Pax7-038.nd2	432.29	333.1	99.19	99.19
73	C2_30d p tmx_Pax7-037.nd2	1022.01	478.21	543.8	543.8
74	C2_30d p tmx_Pax7-037.nd2	780.09	466.52	313.57	313.57
75	C2_30d p tmx_Pax7-036.nd2	523.71	299.11	224.6	224.6
76	C2_30d p tmx_Pax7-035.nd2	1827.92	575.02	1252.9	1252.9
77	C2_30d p tmx_Pax7-035.nd2	861.21	343.97	517.24	517.24
78	C2_30d p tmx_Pax7-034.nd2	776.27	547.44	228.83	228.83
79	C2_30d p tmx_Pax7-034.nd2	1663.78	652.66	1011.12	1011.12
80	C2_30d p tmx_Pax7-033.nd2	1302.85	556.46	746.39	746.39
81	C2_30d p tmx_Pax7-033.nd2	889.97	643.19	246.78	246.78
82	C2_30d p tmx_Pax7-032.nd2	1614.35	565.21	1049.14	1049.14
83	C2_30d p tmx_Pax7-032.nd2	1811.3	490.94	1320.36	1320.36
84	C2_30d p tmx_Pax7-031.nd2	1533.12	518.22	1014.9	1014.9
85	C2_30d p tmx_Pax7-031.nd2	1346.05	391.7	954.35	954.35

## Sheet: Expt3_031120
Item	Source	Pax7 (Cy5) mean intensity	Cy5 channel background	Pax7 mean intensity	Corrected minus to zeros
1	E3_30d p tmx_Pax7-027.nd2	320.79	231.16	89.63	89.63
2	E3_30d p tmx_Pax7-026.nd2	266.67	172.72	93.95	93.95
3	E3_30d p tmx_Pax7-025.nd2	1139.76	689.47	450.29	450.29
4	E3_30d p tmx_Pax7-024.nd2	557.67	361.59	196.08	196.08
5	E3_30d p tmx_Pax7-023.nd2	786.92	501.53	285.39	285.39
6	E3_30d p tmx_Pax7-023.nd2	486.18	339.53	146.65	146.65
7	E3_30d p tmx_Pax7-022.nd2	277.6	191.75	85.85	85.85
8	E3_30d p tmx_Pax7-021.nd2	250.22	192.69	57.53	57.53
9	E3_30d p tmx_Pax7-019.nd2	224.76	167.91	56.85	56.85
10	E3_30d p tmx_Pax7-019.nd2	252.97	203.29	49.68	49.68
11	E3_30d p tmx_Pax7-018.nd2	242.61	207.51	35.1	35.1
12	E3_30d p tmx_Pax7-016.nd2	272.05	215.11	56.94	56.94
13	E3_30d p tmx_Pax7-015.nd2	325.78	192.46	133.32	133.32
14	E3_30d p tmx_Pax7-014.nd2	328.36	219.12	109.24	109.24
15	E3_30d p tmx_Pax7-012.nd2	283.87	194.88	88.99	88.99
16	E3_30d p tmx_Pax7-011.nd2	663.76	463.32	200.44	200.44
17	E3_30d p tmx_Pax7-011.nd2	568.11	291.28	276.83	276.83
18	E3_30d p tmx_Pax7-010.nd2	413.53	314.9	98.63	98.63
19	E3_30d p tmx_Pax7-009.nd2	447.66	253.8	193.86	193.86
20	E3_30d p tmx_Pax7-008.nd2	431.45	327.43	104.02	104.02
21	E3_30d p tmx_Pax7-007.nd2	522.27	392.51	129.76	129.76
22	E3_30d p tmx_Pax7-006.nd2	300.26	177.03	123.23	123.23
23	E3_30d p tmx_Pax7-005.nd2	227.66	163.19	64.47	64.47
24	E3_30d p tmx_Pax7-004.nd2	354	229.32	124.68	124.68
25	E3_30d p tmx_Pax7-004.nd2	360.25	266.73	93.52	93.52
26	E3_30d p tmx_Pax7-003.nd2	660.17	305.78	354.39	354.39
27	E3_30d p tmx_Pax7-002.nd2	337.1	239.38	97.72	97.72
28	E3_30d p tmx_Pax7-001.nd2	224.96	179.65	45.31	45.31

## Sheet: Expt6-2_031120
Item	Source	Pax7 (Cy5) mean intensity	Cy5 channel background	Pax7 mean intensity	Corrected minus to zeros
1	E6-2_30d p tmx_Pax7-030.nd2	616.66	376.21	240.45	240.45
2	E6-2_30d p tmx_Pax7-030.nd2	829.1	438.22	390.88	390.88
3	E6-2_30d p tmx_Pax7-029.nd2	636.89	379.64	257.25	257.25
4	E6-2_30d p tmx_Pax7-028.nd2	765.66	506.17	259.49	259.49
5	E6-2_30d p tmx_Pax7-028.nd2	621.48	311.17	310.31	310.31
6	E6-2_30d p tmx_Pax7-028.nd2	544.59	283.16	261.43	261.43
7	E6-2_30d p tmx_Pax7-028.nd2	464.9	275.12	189.78	189.78
8	E6-2_30d p tmx_Pax7-026.nd2	824.69	434.59	390.1	390.1
9	E6-2_30d p tmx_Pax7-025.nd2	533.67	271.5	262.17	262.17
10	E6-2_30d p tmx_Pax7-025.nd2	481.05	276.96	204.09	204.09
11	E6-2_30d p tmx_Pax7-022.nd2	878.21	499.34	378.87	378.87
12	E6-2_30d p tmx_Pax7-021.nd2	600.2	401.35	198.85	198.85
13	E6-2_30d p tmx_Pax7-021.nd2	519.22	220.32	298.9	298.9
14	E6-2_30d p tmx_Pax7-020.nd2	467.21	310.94	156.27	156.27
15	E6-2_30d p tmx_Pax7-020.nd2	587.16	351.22	235.94	235.94
16	E6-2_30d p tmx_Pax7-019.nd2	605.18	297.57	307.61	307.61
17	E6-2_30d p tmx_Pax7-019.nd2	509.03	358.9	150.13	150.13
18	E6-2_30d p tmx_Pax7-018.nd2	647.87	440.65	207.22	207.22
19	E6-2_30d p tmx_Pax7-018.nd2	620.22	376.94	243.28	243.28
20	E6-2_30d p tmx_Pax7-018.nd2	482.75	385.1	97.65	97.65
21	E6-2_30d p tmx_Pax7-018.nd2	575.07	342.37	232.7	232.7
22	E6-2_30d p tmx_Pax7-017.nd2	742.98	384.06	358.92	358.92
23	E6-2_30d p tmx_Pax7-017.nd2	831.83	633.13	198.7	198.7
24	E6-2_30d p tmx_Pax7-015.nd2	539.13	348.17	190.96	190.96
25	E6-2_30d p tmx_Pax7-013.nd2	480.69	280.99	199.7	199.7
26	E6-2_30d p tmx_Pax7-012.nd2	678.1	280.95	397.15	397.15
27	E6-2_30d p tmx_Pax7-011.nd2	503.89	209.91	293.98	293.98
28	E6-2_30d p tmx_Pax7-011.nd2	400.36	239.4	160.96	160.96
29	E6-2_30d p tmx_Pax7-010.nd2	553.64	233.86	319.78	319.78
30	E6-2_30d p tmx_Pax7-010.nd2	466.33	257.22	209.11	209.11
31	E6-2_30d p tmx_Pax7-009.nd2	607.6	361.09	246.51	246.51
32	E6-2_30d p tmx_Pax7-009.nd2	663.67	373.06	290.61	290.61
33	E6-2_30d p tmx_Pax7-008.nd2	645.56	286.54	359.02	359.02
34	E6-2_30d p tmx_Pax7-007.nd2	482.82	260.82	222	222
35	E6-2_30d p tmx_Pax7-007.nd2	582.81	386.97	195.84	195.84
36	E6-2_30d p tmx_Pax7-007.nd2	446.29	314.91	131.38	131.38
37	E6-2_30d p tmx_Pax7-006.nd2	407.49	240.25	167.24	167.24
38	E6-2_30d p tmx_Pax7-006.nd2	438.01	224.68	213.33	213.33
39	E6-2_30d p tmx_Pax7-005.nd2	403.54	278.59	124.95	124.95
40	E6-2_30d p tmx_Pax7-005.nd2	464.48	232.81	231.67	231.67
41	E6-2_30d p tmx_Pax7-004.nd2	479.12	286.18	192.94	192.94
42	E6-2_30d p tmx_Pax7-003.nd2	559.27	240.21	319.06	319.06
43	E6-2_30d p tmx_Pax7-003.nd2	360.46	229.08	131.38	131.38
44	E6-2_30d p tmx_Pax7-003.nd2	361.78	196.86	164.92	164.92
45	E6-2_30d p tmx_Pax7-002.nd2	299.92	213.99	85.93	85.93
46	E6-2_30d p tmx_Pax7-002.nd2	506.29	228.37	277.92	277.92
47	E6-2_30d p tmx_Pax7-002.nd2	607.94	234.51	373.43	373.43
48	E6-2_30d p tmx_Pax7-001.nd2	293.16	199.89	93.27	93.27
49	E6-2_30d p tmx_Pax7-045.nd2	674.18	409.89	264.29	264.29
50	E6-2_30d p tmx_Pax7-045.nd2	472.44	320.45	151.99	151.99
51	E6-2_30d p tmx_Pax7-043.nd2	780.13	402.87	377.26	377.26
52	E6-2_30d p tmx_Pax7-043.nd2	500.05	304.8	195.25	195.25
53	E6-2_30d p tmx_Pax7-043.nd2	630.71	257.61	373.1	373.1
54	E6-2_30d p tmx_Pax7-042.nd2	361.42	246.23	115.19	115.19
55	E6-2_30d p tmx_Pax7-042.nd2	742.55	372.72	369.83	369.83
56	E6-2_30d p tmx_Pax7-042.nd2	418.12	261.42	156.7	156.7
57	E6-2_30d p tmx_Pax7-042.nd2	619.85	291.32	328.53	328.53
58	E6-2_30d p tmx_Pax7-040.nd2	747.49	364.51	382.98	382.98
59	E6-2_30d p tmx_Pax7-038.nd2	639.25	277.45	361.8	361.8
60	E6-2_30d p tmx_Pax7-037.nd2	576.96	300.49	276.47	276.47
61	E6-2_30d p tmx_Pax7-037.nd2	573.46	310.44	263.02	263.02
62	E6-2_30d p tmx_Pax7-037.nd2	554.43	283.25	271.18	271.18
63	E6-2_30d p tmx_Pax7-036.nd2	595.81	255.96	339.85	339.85
64	E6-2_30d p tmx_Pax7-036.nd2	464	230.44	233.56	233.56
65	E6-2_30d p tmx_Pax7-036.nd2	510.73	279.41	231.32	231.32
66	E6-2_30d p tmx_Pax7-035.nd2	298.62	247.96	50.66	50.66
67	E6-2_30d p tmx_Pax7-034.nd2	519.86	286.88	232.98	232.98
68	E6-2_30d p tmx_Pax7-034.nd2	468.71	253.18	215.53	215.53
69	E6-2_30d p tmx_Pax7-033.nd2	390.41	249.72	140.69	140.69
70	E6-2_30d p tmx_Pax7-033.nd2	612.94	269.42	343.52	343.52
71	E6-2_30d p tmx_Pax7-033.nd2	465.62	272.76	192.86	192.86
72	E6-2_30d p tmx_Pax7-032.nd2	613.07	263.61	349.46	349.46
73	E6-2_30d p tmx_Pax7-031.nd2	659.71	279.67	380.04	380.04

## Sheet: Expt34_040820
Item	Source	Pax7 (Cy5) mean intensity	Cy5 channel background	Pax7 mean intensity	Corrected minus to zeros
1	E34_30d p tmx_Pax7-046.nd2	739.49	423.96	315.53	315.53
2	E34_30d p tmx_Pax7-046.nd2	856.68	625.61	231.07	231.07
3	E34_30d p tmx_Pax7-044.nd2	812.46	618.67	193.79	193.79
4	E34_30d p tmx_Pax7-042.nd2	691.05	550.29	140.76	140.76
5	E34_30d p tmx_Pax7-042.nd2	574.6	351.2	223.4	223.4
6	E34_30d p tmx_Pax7-040.nd2	826.72	476.93	349.79	349.79
7	E34_30d p tmx_Pax7-040.nd2	431.96	358.3	73.66	73.66
8	E34_30d p tmx_Pax7-039.nd2	419.21	321.24	97.97	97.97
9	E34_30d p tmx_Pax7-038.nd2	630.31	384.57	245.74	245.74
10	E34_30d p tmx_Pax7-037.nd2	695.22	366.87	328.35	328.35
11	E34_30d p tmx_Pax7-037.nd2	361.48	332.76	28.72	28.72
12	E34_30d p tmx_Pax7-036.nd2	596.36	305.03	291.33	291.33
13	E34_30d p tmx_Pax7-032.nd2	796.55	461.52	335.03	335.03
14	E34_30d p tmx_Pax7-030.nd2	455.54	319.02	136.52	136.52
15	E34_30d p tmx_Pax7-028.nd2	548.59	388.78	159.81	159.81
16	E34_30d p tmx_Pax7-027.nd2	453.66	305.21	148.45	148.45
17	E34_30d p tmx_Pax7-026.nd2	303.86	271.15	32.71	32.71
18	E34_30d p tmx_Pax7-026.nd2	389.79	304.29	85.5	85.5
19	E34_30d p tmx_Pax7-025.nd2	457.87	363.64	94.23	94.23
20	E34_30d p tmx_Pax7-025.nd2	399.7	356.44	43.26	43.26
21	E34_30d p tmx_Pax7-025.nd2	363.97	281.54	82.43	82.43
22	E34_30d p tmx_Pax7-024.nd2	368.97	283.1	85.87	85.87
23	E34_30d p tmx_Pax7-024.nd2	410.49	312.51	97.98	97.98
24	E34_30d p tmx_Pax7-023.nd2	729.69	543.73	185.96	185.96
25	E34_30d p tmx_Pax7-022.nd2	1348.73	961.99	386.74	386.74
26	E34_30d p tmx_Pax7-022.nd2	695.78	492.97	202.81	202.81
27	E34_30d p tmx_Pax7-021.nd2	756.31	567.11	189.2	189.2
28	E34_30d p tmx_Pax7-020.nd2	823.52	492.83	330.69	330.69
29	E34_30d p tmx_Pax7-020.nd2	1014.39	692.96	321.43	321.43
30	E34_30d p tmx_Pax7-019.nd2	832.16	522.5	309.66	309.66
31	E34_30d p tmx_Pax7-017.nd2	737.21	391.87	345.34	345.34
32	E34_30d p tmx_Pax7-016.nd2	660.44	479.32	181.12	181.12
33	E34_30d p tmx_Pax7-014.nd2	821.46	486.86	334.6	334.6
34	E34_30d p tmx_Pax7-013.nd2	859.03	512.8	346.23	346.23
35	E34_30d p tmx_Pax7-010.nd2	800.76	603.63	197.13	197.13
36	E34_30d p tmx_Pax7-010.nd2	570.63	446.99	123.64	123.64
37	E34_30d p tmx_Pax7-008.nd2	452.94	318.94	134	134
38	E34_30d p tmx_Pax7-007.nd2	365.68	286.04	79.64	79.64
39	E34_30d p tmx_Pax7-007.nd2	425.01	281.5	143.51	143.51
40	E34_30d p tmx_Pax7-006.nd2	659.24	434.78	224.46	224.46
41	E34_30d p tmx_Pax7-006.nd2	651.47	426.92	224.55	224.55
42	E34_30d p tmx_Pax7-006.nd2	450.37	372.98	77.39	77.39
43	E34_30d p tmx_Pax7-005.nd2	677.72	322.84	354.88	354.88
44	E34_30d p tmx_Pax7-004.nd2	781.65	567.66	213.99	213.99
45	E34_30d p tmx_Pax7-004.nd2	499.63	358.64	140.99	140.99
46	E34_30d p tmx_Pax7-003.nd2	578.23	410.75	167.48	167.48
47	E34_30d p tmx_Pax7-002.nd2	297.23	210	87.23	87.23
48	E34_30d p tmx_Pax7-001.nd2	379.85	251.43	128.42	128.42
49	E34_30d p tmx_Pax7-001.nd2	315.45	214.65	100.8	100.8
