# Supplementary material for: Heterogeneous levels of delta-like 4 within a multinucleated niche cell maintains muscle stem cell diversity
Source: eLife. 2022 Dec 30;11:e68180. doi: 10.7554/eLife.68180 (PMC9803355; doi:10.7554/eLife.68180)
Supplement: Figure 7—source data 1. [file elife-68180-fig7-data1.xlsx]

## Sheet: Mib1_Fiber
Block Type	96well
Chemistry	SYBR_GREEN
Experiment File Name	C:\Users\Susan Eliazer\Desktop\QPCR runs\Mib130d recovery-Fiber data_051514.eds
Experiment Run End Time	Not Started
Instrument Type	steponeplus
Passive Reference	ROX
Well	Sample Name	Target Name	Cт	Cт Mean	ΔCт	ΔCт Mean	ΔΔCт	Fold Difference	Mean	Avg of 2 expts	SD	SD of 2 expts
A1	Ctrl-4	18S	22.9953	23.1421
A2	Ctrl-4	18S	23.143
A3	Ctrl-4	18S	23.288
A10	Expt-8	18S	24.9292	24.9511
A11	Expt-8	18S	24.9937
A12	Expt-8	18S	24.9306
A4	Ctrl-6	18S	21.864	21.8426
A5	Ctrl-6	18S	21.8099
A6	Ctrl-6	18S	21.854
A7	Expt-7	18S	21.7786	21.7554
A8	Expt-7	18S	21.795
A9	Expt-7	18S	21.6925
B1	Ctrl-4	Mib1	31.8509		8.7088	8.39319	0.315612	0.80351	1.01195	1.00613	0.184085	0.107202
B2	Ctrl-4	Mib1	31.4241		8.28202		-0.111162	1.0801
B3	Ctrl-4	Mib1	31.3308		8.18874		-0.20445	1.15225
B10	Expt-8	Mib1	Undetermined						0.214436	0.159781	0.186747	0.107025
B11	Expt-8	Mib1	36.9458		11.9946		3.60146	0.082386
B12	Expt-8	Mib1	34.8734		9.92232		1.52913	0.346486
B4	Ctrl-6	Mib1	28.5555		6.71287	6.70723	0.00563812	0.9961	1.00031		0.030319
B5	Ctrl-6	Mib1	28.5037		6.66108		-0.0461521	1.03251
B6	Ctrl-6	Mib1	28.5904		6.74775		0.040514	0.972308
B7	Expt-7	Mib1	31.8796		10.1243		3.41703	0.0936208	0.105125		0.0273037
B8	Expt-7	Mib1	31.3378		9.58239		2.87516	0.136298
B9	Expt-7	Mib1	32.0113		10.2559		3.54867	0.0854563
G1	Ctrl-4 -RT	18S	Undetermined
G2	Ctrl-6 -RT	18S	Undetermined
G3	Expt-7 -RT	18S	Undetermined
G4	Expt-8 -RT	18S	Undetermined
G5	Ctrl-4 -RT	Mib1	Undetermined
G6	Ctrl-6 -RT	Mib1	Undetermined
G7	Expt-7 -RT	Mib1	Undetermined
G8	Expt-8 -RT	Mib1	Undetermined
