# Supplementary material for: Heterogeneous levels of delta-like 4 within a multinucleated niche cell maintains muscle stem cell diversity
Source: eLife. 2022 Dec 30;11:e68180. doi: 10.7554/eLife.68180 (PMC9803355; doi:10.7554/eLife.68180)
Supplement: Figure 7—source data 2. [file elife-68180-fig7-data2.xlsx]

## Sheet: Ctrl6-1_031120
Mib1fl/fl		SCs on TA sections
30 days after tmx		Ctrl 6-1
at tissue homeostasis
	# of Pax7+ SCs	Area (mm2)	# of Pax7+ SCs/mm2 tissue section	Average
Section 1-001	9	1.67
Section 1-002	15	1.94
Section 1-003	1	0.19
Section 1-004	21	1.49
Section 1-005	8	1.78
Section 1-006	1	0.17
	55	7.24	7.59669	9.08508
Section2-001	16	1.57
Section2-002	18	1.76
Section2-003	1	0.11
Section2-004	9	0.94
Section2-005	15	1.2
	59	5.58	10.5735

## Sheet: Ctrl6-2_031120
Mib1fl/fl		SCs on TA sections
30 days after tmx		Ctrl 6-2
at tissue homeostasis
	# of Pax7+ SCs	Area (mm2)	# of Pax7+ SCs/mm2 tissue section	Average
Section 1-001	19	1.68
Section 1-002	14	1.82
Section 1-003	4	0.54
Section 1-004	2	0.7
Section 1-005	24	1.69
Section 1-006	2	0.34
	65	6.77	9.60118	11.6945
Section2-001	29	1.82
Section2-002	28	1.74
Section2-003	5	0.41
Section2-004	11	0.94
Section2-005	17	1.45
Section2-006	1	0.24
	91	6.6	13.7879

## Sheet: Expt3_031120
Muscle Cre-Mib1fl/fl		SCs on TA sections
30 days after tmx		Expt 3
at tissue homeostasis
	# of Pax7+ SCs	Area (mm2)	# of Pax7+ SCs/mm2 tissue section	Average
Section 1-001	4	1.4
Section 1-002	2	1.92
Section 1-003	3	1.16
Section 1-004	2	0.93
Section 1-005	4	1.94
Section 1-006	0	0.4
Section 1-007	5	0.2
	20	7.95	2.51572	2.4424
Section2-001	3	1.67
Section2-002	2	1.95
Section2-003	1	0.83
Section2-004	2	1.21
Section2-005	4	1.55
Section2-006	2	0.41
Section2-007	5	0.4
	19	8.02	2.36908

## Sheet: Expt4_031120
Muscle Cre-Mib1fl/fl		SCs on TA sections
30 days after tmx		Expt 4
at tissue homeostasis
	# of Pax7+ SCs	Area (mm2)	# of Pax7+ SCs/mm2 tissue section	Average
Section 1-001	2	1.67
Section 1-002	4	1.95
Section 1-003	2	0.65
Section 1-004	4	1.14
Section 1-005	2	1.21
Section 1-006	1	0.2
	15	6.82	2.19941	1.99626
Section2-001	3	1.74
Section2-002	2	1.99
Section2-003	1	0.71
Section2-004	4	0.76
Section2-005	2	1.65
Section2-006	1	0.4
	13	7.25	1.7931

## Sheet: Ctrl6_123015
Mib1fl/fl		SCs on TA sections
30 days after tmx		Ctrl 6
at tissue homeostasis
	# of Pax7+ SCs	Area (mm2)	# of Pax7+ SCs/mm2 tissue section	Average
Section 1-001	13	1.67
Section 1-002	10	1.42
Section 1-003	15	1.92
Section 1-004	7	1.44
Section 1-005	2	0.4
Section 1-006	7	0.6
	54	7.45	7.24832	7.90805
Section2-001	18	1.86
Section2-002	15	2.01
Section2-003	5	0.8
Section2-004	12	1.48
Section2-005	10	0.88
Section2-006	7	0.79
	67	7.82	8.56777

## Sheet: Expt9_123015
Muscle Cre-Mib1fl/fl		SCs on TA sections
30 days after tmx		Expt 9
at tissue homeostasis
	# of Pax7+ SCs	Area (mm2)	# of Pax7+ SCs/mm2 tissue section	Average
Section 1-001	11	1.62
Section 1-002	4	0.51
Section 1-003	4	1.1
Section 1-004	3	0.47
Section 1-005	8	1.5
	30	5.2	5.76923	5.51619
Section2-001	7	1.69
Section2-002	11	1.88
Section2-003	4	1.05
Section2-004	0	0.28
Section2-005	13	1.56
Section2-006	2	0.57
	37	7.03	5.26316

## Sheet: Ctrl6_021516
Mib1fl/fl		SCs on TA sections
30 days after tmx		Ctrl 6
at tissue homeostasis
	# of Pax7+ SCs	Area (mm2)	# of Pax7+ SCs/mm2 tissue section	Average
Section 1-001	6	1.4
Section 1-002	18	1.66
Section 1-003	21	1.48
Section 1-004	12	1.1
Section 1-005	14	2
Section 1-006	1	0.8
	72	8.44	8.53081	8.52435
Section2-001	7	1.5
Section2-002	17	1.72
Section2-003	23	1.69
Section2-004	2	0.66
Section2-005	1	0.3
	50	5.87	8.51789

## Sheet: Expt3_021516
Muscle Cre-Mib1fl/fl		SCs on TA sections
30 days after tmx		Expt 3
at tissue homeostasis
	# of Pax7+ SCs	Area (mm2)	# of Pax7+ SCs/mm2 tissue section	Average
Section 1-001	10	1.67
Section 1-002	13	1.99
Section 1-003	6	1.1
Section 1-004	1	0.6
Section 1-005	19	1.93
Section 1-006	1	0.8
	50	8.09	6.18047	6.58298
Section2-001	10	1.7
Section2-002	18	1.98
Section2-003	8	0.98
Section2-004	14	1.824
Section2-005	1	0.29
Section2-006	1	0.67
	52	7.444	6.98549

## Sheet: Ctrl1_040820
Mib1fl/fl		SCs on TA sections
30 days after tmx		Ctrl 1
at tissue homeostasis
	# of Pax7+ SCs	Area (mm2)	# of Pax7+ SCs/mm2 tissue section	Average
Section 1-001	30	1.73
Section 1-002	7	0.69
Section 1-003	16	1.47
Section 1-004	19	1.67
Section 1-005	8	0.47
Section 1-006	5	0.19
	85	6.22	13.6656	13.5788
Section2-001	26	1.76
Section2-002	14	1.12
Section2-003	14	1.26
Section2-004	21	1.7
Section2-005	10	0.46
	85	6.3	13.4921

## Sheet: Ctrl6_040820
Mib1fl/fl		SCs on TA sections
30 days after tmx		Ctrl 6
at tissue homeostasis
	# of Pax7+ SCs	Area (mm2)	# of Pax7+ SCs/mm2 tissue section	Average
Section 1-001	27	1.75
Section 1-002	23	1.72
Section 1-003	9	0.34
Section 1-004	9	0.58
Section 1-005	27	1.37
Section 1-006	1	0.21
	96	5.97	16.0804	15.4888
Section2-001	23	1.7
Section2-002	26	1.8
Section2-003	2	0.19
Section2-004	16	0.79
Section2-005	17	1.26
Section2-006	3	0.1
	87	5.84	14.8973

[truncated: 2 more sheets: Expt34_040820, Expt2_040820]
