# Supplementary material for: Heterogeneous levels of delta-like 4 within a multinucleated niche cell maintains muscle stem cell diversity
Source: eLife. 2022 Dec 30;11:e68180. doi: 10.7554/eLife.68180 (PMC9803355; doi:10.7554/eLife.68180)
Supplement: Figure 7—source data 3. [file elife-68180-fig7-data3.xlsx]

## Sheet: Myogenic Genes_SC
Block Type	96well
Chemistry	SYBR_GREEN
Experiment File Name	C:\Users\Susan Eliazer\Desktop\QPCR runs\Mib130d recovery-SC data_051514.eds
Experiment Run End Time	Not Started
Instrument Type	steponeplus
Passive Reference	ROX
Well	Sample Name	Target Name	Cт	Cт Mean	ΔCт	ΔCт Mean	ΔΔCт	Fold Difference	Mean	Avg of 2 expts	SD	SD of 2 expts
A1	Ctrl-4	18S	22.8536	22.8153
A2	Ctrl-4	18S	22.8105
A3	Ctrl-4	18S	22.7817
A10	Expt-8	18S	22.9291	22.921
A11	Expt-8	18S	22.9163
A12	Expt-8	18S	22.9176
A4	Ctrl-6	18S	20.8601	20.8752
A5	Ctrl-6	18S	20.8698
A6	Ctrl-6	18S	20.8957
A7	Expt-7	18S	21.7122	21.6907
A8	Expt-7	18S	21.6796
A9	Expt-7	18S	21.6803
B1	Ctrl-4	Pax7	29.843		7.02775	7.05281	-0.0250657	1.01753	1.0004	1.00045	0.0344476	0.0365932
B2	Ctrl-4	Pax7	29.8354		7.02011		-0.0327066	1.02293
B3	Ctrl-4	Pax7	29.9259		7.11058		0.0577723	0.960746
B10	Expt-8	Pax7	30.174		7.25302		0.200209	0.870425	0.926212	0.841216	0.0937832	0.080427
B11	Expt-8	Pax7	30.1686		7.24756		0.194748	0.873726
B12	Expt-8	Pax7	29.9249		7.0039		-0.0489159	1.03449
B4	Ctrl-6	Pax7	27.8566		6.98141	6.9848	-0.00338682	1.00235	1.0005		0.0387387
B5	Ctrl-6	Pax7	27.9176		7.04238		0.0575854	0.960871
B6	Ctrl-6	Pax7	27.8058		6.9306		-0.0541986	1.03828
B7	Expt-7	Pax7	29.0708		7.38002		0.39522	0.760374	0.756221		0.0670708
B8	Expt-7	Pax7	29.2168		7.52606		0.541262	0.68717
B9	Expt-7	Pax7	28.9599		7.26914		0.284338	0.821118
C1	Ctrl-4	MyoD	25.7122		2.89688	2.82722	0.0696589	0.952863	1.00065	1.00072	0.0438928	0.0465223
C2	Ctrl-4	MyoD	25.5871		2.77179		-0.0554326	1.03917
C3	Ctrl-4	MyoD	25.6283		2.81299		-0.0142263	1.00991
C10	Expt-8	MyoD	25.3911		2.47007		-0.357147	1.28089	1.27692	1.0161	0.0254083	0.0175081
C11	Expt-8	MyoD	25.3696		2.44858		-0.378637	1.30011
C12	Expt-8	MyoD	25.4266		2.50557		-0.321655	1.24976
C4	Ctrl-6	MyoD	22.9241		2.04893	2.12961	-0.0806821	1.05752	1.00079		0.0491517
C5	Ctrl-6	MyoD	23.0429		2.16767		0.0380618	0.973963
C6	Ctrl-6	MyoD	23.0474		2.17223		0.0426203	0.97089
C7	Expt-7	MyoD	24.2462		2.55549		0.425884	0.744382	0.755276		0.00960788
C8	Expt-7	MyoD	24.2115		2.52072		0.391109	0.762543
C9	Expt-7	MyoD	24.2184		2.52763		0.398016	0.758901
D1	Ctrl-4	Myogenin	35.9291		13.1138	13.5987	-0.484858	1.39945	1.05701	1.03349	0.484283	0.342275
D2	Ctrl-4	Myogenin	36.8988		14.0835		0.484858	0.714568
D3	Ctrl-4	Myogenin
D10	Expt-8	Myogenin							3.7507	10.224	0.151979	1.51013
D11	Expt-8	Myogenin	34.5718		11.6507		-1.94791	3.85816
D12	Expt-8	Myogenin	34.6544		11.7334		-1.86522	3.64323
D4	Ctrl-6	Myogenin	34.2565		13.3813	13.585	-0.203623	1.15159	1.00998		0.200266
D5	Ctrl-6	Myogenin
D6	Ctrl-6	Myogenin	34.6638		13.7886		0.203623	0.868367
D7	Expt-7	Myogenin	31.1751		9.48432		-4.10065	17.1561	16.6973		2.86829
D8	Expt-7	Myogenin	31.0045		9.3138		-4.27117	19.3085
D9	Expt-7	Myogenin	31.5073		9.81654		-3.76842	13.6273
G1	Ctrl-4 -RT	18S	Undetermined
G2	Ctrl-6 -RT	18S	Undetermined
G3	Expt-7 -RT	18S	Undetermined
G4	Expt-8 -RT	18S	Undetermined
G5	Ctrl-4 -RT	Pax7	Undetermined
G6	Ctrl-6 -RT	Pax7	Undetermined
G7	Expt-7 -RT	Pax7	Undetermined
G8	Expt-8 -RT	Pax7	Undetermined
G9	Ctrl-4 -RT	MyoD	Undetermined
G10	Ctrl-6 -RT	MyoD	Undetermined
G11	Expt-7 -RT	MyoD	Undetermined
G12	Expt-8 -RT	MyoD	Undetermined
H1	Ctrl-4 -RT	Myogenin	Undetermined
H2	Ctrl-6 -RT	Myogenin	Undetermined
H3	Expt-7 -RT	Myogenin	Undetermined
H4	Expt-8 -RT	Myogenin	Undetermined
