# Supplementary material for: Heterogeneous levels of delta-like 4 within a multinucleated niche cell maintains muscle stem cell diversity
Source: eLife. 2022 Dec 30;11:e68180. doi: 10.7554/eLife.68180 (PMC9803355; doi:10.7554/eLife.68180)
Supplement: Figure 7—source data 4. [file elife-68180-fig7-data4.xlsx]

## Sheet: Ctrl6-1_MyoG
Item	Source	Myogenin (TxRed) Mean Intensity	TxRed Background intensity	Myogenin intensity- Background intensity	Corrected minus to zeros		# of stem cells	# of myoG+ SCs	% myogenin +/ fiber	Fraction of SCs marked with MyoG		Total % myogenin positive
Fiber No.1
2	Ctrl6-1_t48_Myogenin-006.nd2	1076.38	936.04	140.34	140.34		13	1	7.69231	0.0769231		18.6813
5	Ctrl6-1_t48_Myogenin-006.nd2	1624.6	1077.7	546.9	546.9	positive
8	Ctrl6-1_t48_Myogenin-004.nd2	931.32	787.72	143.6	143.6
11	Ctrl6-1_t48_Myogenin-004.nd2	562.34	581.96	-19.62	0
14	Ctrl6-1_t48_Myogenin-003.nd2	1116.38	1017.62	98.76	98.76
17	Ctrl6-1_t48_Myogenin-003.nd2	833.98	770.71	63.27	63.27
20	Ctrl6-1_t48_Myogenin-003.nd2	579.25	668.12	-88.87	0
23	Ctrl6-1_t48_Myogenin-002.nd2	972.15	898.75	73.4	73.4
26	Ctrl6-1_t48_Myogenin-001.nd2	565.8	872.24	-306.44	0
Fiber No.2				0	0
2	Ctrl6-1_t48_Myogenin-007.nd2	1073.9	1133.96	-60.06	0
5	Ctrl6-1_t48_Myogenin-007.nd2	435.44	882.08	-446.64	0
8	Ctrl6-1_t48_Myogenin-007.nd2	1270.02	1199.94	70.08	70.08
Fiber No.3
2	Ctrl6-1_t48_Myogenin-012.nd2	679.95	608.45	71.5	71.5		8	3	37.5	0.375
5	Ctrl6-1_t48_Myogenin-012.nd2	944.77	853.06	91.71	91.71
8	Ctrl6-1_t48_Myogenin-011.nd2	1075.21	619.55	455.66	455.66	positive
11	Ctrl6-1_t48_Myogenin-011.nd2	1006.29	839.26	167.03	167.03	positive
14	Ctrl6-1_t48_Myogenin-011.nd2	992.1	847.71	144.39	144.39
17	Ctrl6-1_t48_Myogenin-010.nd2	1254.9	1062.31	192.59	192.59	positive
20	Ctrl6-1_t48_Myogenin-009.nd2	554.62	694.36	-139.74	0
23	Ctrl6-1_t48_Myogenin-008.nd2	416.05	602.55	-186.5	0
Fiber No.4
2	Ctrl6-1_t48_Myogenin-017.nd2	815.31	731.32	83.99	83.99		11	1	9.09091	0.0909091
5	Ctrl6-1_t48_Myogenin-017.nd2	631.96	626.16	5.8	5.8
8	Ctrl6-1_t48_Myogenin-016.nd2	925.06	857.53	67.53	67.53
11	Ctrl6-1_t48_Myogenin-016.nd2	795.8	759.86	35.94	35.94
14	Ctrl6-1_t48_Myogenin-016.nd2	666.88	659.21	7.67	7.67
17	Ctrl6-1_t48_Myogenin-015.nd2	732.45	627.64	104.81	104.81
20	Ctrl6-1_t48_Myogenin-015.nd2	709.17	654.96	54.21	54.21
23	Ctrl6-1_t48_Myogenin-015.nd2	615.72	524.09	91.63	91.63
26	Ctrl6-1_t48_Myogenin-014.nd2	917.4	770.3	147.1	147.1
29	Ctrl6-1_t48_Myogenin-014.nd2	774.63	732.95	41.68	41.68
32	Ctrl6-1_t48_Myogenin-013.nd2	966.37	769.12	197.25	197.25	positive
Fiber No.5
2	Ctrl6-1_t48_Myogenin-025.nd2	275.88	346.42	-70.54	0		17	3	17.6471	0.176471
5	Ctrl6-1_t48_Myogenin-025.nd2	468.42	562.55	-94.13	0
8	Ctrl6-1_t48_Myogenin-025.nd2	319.13	623.61	-304.48	0
11	Ctrl6-1_t48_Myogenin-025.nd2	452.77	600.34	-147.57	0
14	Ctrl6-1_t48_Myogenin-025.nd2	534.55	465.6	68.95	68.95
17	Ctrl6-1_t48_Myogenin-023.nd2	822.4	806.27	16.13	16.13
20	Ctrl6-1_t48_Myogenin-022.nd2	880.29	859.84	20.45	20.45
23	Ctrl6-1_t48_Myogenin-022.nd2	1012.87	732.37	280.5	280.5	positive
26	Ctrl6-1_t48_Myogenin-021.nd2	886.21	954.64	-68.43	0
29	Ctrl6-1_t48_Myogenin-021.nd2	990.04	941.62	48.42	48.42
32	Ctrl6-1_t48_Myogenin-021.nd2	954.93	649.77	305.16	305.16	positive
35	Ctrl6-1_t48_Myogenin-021.nd2	832.72	659.57	173.15	173.15	positive
39	Ctrl6-1_t48_Myogenin-020.nd2	856.45	720.3	136.15	136.15
42	Ctrl6-1_t48_Myogenin-020.nd2	435.41	629.58	-194.17	0
45	Ctrl6-1_t48_Myogenin-020.nd2	518.28	538.39	-20.11	0
48	Ctrl6-1_t48_Myogenin-019.nd2	959.58	849.42	110.16	110.16
51	Ctrl6-1_t48_Myogenin-019.nd2	856.02	785.7	70.32	70.32
Fiber No.6
2	Ctrl6-1_t48_Myogenin-028.nd2	653.37	640.26	13.11	13.11		4	2	50	0.5
5	Ctrl6-1_t48_Myogenin-028.nd2	520.97	503.74	17.23	17.23
8	Ctrl6-1_t48_Myogenin-026.nd2	887.1	712.55	174.55	174.55	positive
11	Ctrl6-1_t48_Myogenin-026.nd2	896.67	696.44	200.23	200.23	positive
Fiber No.7
2	Ctrl6-1_t48_Myogenin-033.nd2	1265.96	883.76	382.2	382.2		13	5	38.4615	0.384615
5	Ctrl6-1_t48_Myogenin-033.nd2	1264.89	861.32	403.57	403.57	positive
8	Ctrl6-1_t48_Myogenin-032.nd2	1032.97	958.46	74.51	74.51
11	Ctrl6-1_t48_Myogenin-032.nd2	1072.49	936.93	135.56	135.56
14	Ctrl6-1_t48_Myogenin-032.nd2	949.45	906.02	43.43	43.43
17	Ctrl6-1_t48_Myogenin-031.nd2	687.69	853.9	-166.21	0
20	Ctrl6-1_t48_Myogenin-030.nd2	1879.62	1210.72	668.9	668.9	positive
23	Ctrl6-1_t48_Myogenin-030.nd2	791.11	735.42	55.69	55.69
26	Ctrl6-1_t48_Myogenin-030.nd2	929.05	777.91	151.14	151.14	positive
29	Ctrl6-1_t48_Myogenin-030.nd2	1165.5	810.18	355.32	355.32	positive
32	Ctrl6-1_t48_Myogenin-030.nd2	1020.77	1018.49	2.28	2.28
35	Ctrl6-1_t48_Myogenin-030.nd2	724.92	781.27	-56.35	0
38	Ctrl6-1_t48_Myogenin-029.nd2	747.97	596.35	151.62	151.62	positive
Fiber No.8
2	Ctrl6-1_t48_Myogenin-043.nd2	849.73	934.57	-84.84	0		12	2	16.6667	0.166667
5	Ctrl6-1_t48_Myogenin-042.nd2	636	636.81	-0.81	0
8	Ctrl6-1_t48_Myogenin-042.nd2	724.58	733.5	-8.92	0
11	Ctrl6-1_t48_Myogenin-042.nd2	1200.39	866.8	333.59	333.59	positive
14	Ctrl6-1_t48_Myogenin-042.nd2	1001.3	883.88	117.42	117.42
17	Ctrl6-1_t48_Myogenin-042.nd2	862.12	777.73	84.39	84.39
20	Ctrl6-1_t48_Myogenin-040.nd2	446.23	601.7	-155.47	0
23	Ctrl6-1_t48_Myogenin-040.nd2	761.79	815.12	-53.33	0
26	Ctrl6-1_t48_Myogenin-040.nd2	927.32	836.7	90.62	90.62
29	Ctrl6-1_t48_Myogenin-040.nd2	518.19	729.67	-211.48	0
32	Ctrl6-1_t48_Myogenin-039.nd2	1401.24	1185.77	215.47	215.47	positive
35	Ctrl6-1_t48_Myogenin-038.nd2	822.28	897.19	-74.91	0
Fiber No.9
2	Ctrl6-1_t48_Myogenin-046.nd2	773.34	716.78	56.56	56.56		6	0	0	0
5	Ctrl6-1_t48_Myogenin-045.nd2	663.5	594.77	68.73	68.73
8	Ctrl6-1_t48_Myogenin-045.nd2	719.59	673.86	45.73	45.73
11	Ctrl6-1_t48_Myogenin-045.nd2	948.37	883.29	65.08	65.08
14	Ctrl6-1_t48_Myogenin-044.nd2	633.04	564.94	68.1	68.1
17	Ctrl6-1_t48_Myogenin-044.nd2	647.24	610.58	36.66	36.66
Fiber No.10
2	Ctrl6-1_t48_Myogenin-050.nd2	703.74	571.31	132.43	132.43		7	0	0	0
5	Ctrl6-1_t48_Myogenin-049.nd2	578.77	620.87	-42.1	0
8	Ctrl6-1_t48_Myogenin-049.nd2	597.11	623.83	-26.72	0
11	Ctrl6-1_t48_Myogenin-049.nd2	406.67	588.75	-182.08	0
14	Ctrl6-1_t48_Myogenin-048.nd2	828.8	741.12	87.68	87.68
17	Ctrl6-1_t48_Myogenin-048.nd2	569.81	581	-11.19	0
20	Ctrl6-1_t48_Myogenin-047.nd2	394.04	644.17	-250.13	0
					Total		91	17

## Sheet: Ctrl6-2_MyoG
Item	Source	Myogenin (TxRed) Mean Intensity	TxRed Background intensity	Myogenin intensity- Background intensity	Corrected minus to zeros		# of stem cells	# of myoG+ SCs	% myogenin +/ fiber	Fraction of SCs marked with MyoG		Total % myogenin positive
Fiber No.1
2	Ctrl6-2_t48_Myogenin-003.nd2	331.36	375.71	-44.35	0		8	0	0	0		8.16327
5	Ctrl6-2_t48_Myogenin-003.nd2	415.71	465.93	-50.22	0
8	Ctrl6-2_t48_Myogenin-003.nd2	531.82	528.59	3.23	3.23
11	Ctrl6-2_t48_Myogenin-002.nd2	649.72	714.06	-64.34	0
14	Ctrl6-2_t48_Myogenin-002.nd2	512.48	418.54	93.94	93.94
17	Ctrl6-2_t48_Myogenin-002.nd2	473.73	474.46	-0.73	0
20	Ctrl6-2_t48_Myogenin-001.nd2	368.92	607.68	-238.76	0
23	Ctrl6-2_t48_Myogenin-001.nd2	423.79	461.78	-37.99	0
Fiber No.2
2	Ctrl6-2_t48_Myogenin-006.nd2	761.99	590.8	171.19	171.19	positive	3	1	33.3333	0.333333
5	Ctrl6-2_t48_Myogenin-005.nd2	511.03	504.42	6.61	6.61
8	Ctrl6-2_t48_Myogenin-004.nd2	499.04	581.47	-82.43	0
Fiber No.3
2	Ctrl6-2_t48_Myogenin-008.nd2	964.47	1472.59	-508.12	0		3	1	33.3333	0.333333
5	Ctrl6-2_t48_Myogenin-008.nd2	1532.98	1323.43	209.55	209.55	positive
2	Ctrl6-2_t48_Myogenin-007.nd2	1110.18	1150.85	-40.67	0
Fiber No.4
2	Ctrl6-2_t48_Myogenin-011.nd2	719.29	536.97	182.32	182.32	positive	5	1	20	0.2
5	Ctrl6-2_t48_Myogenin-011.nd2	655.17	541.88	113.29	113.29
8	Ctrl6-2_t48_Myogenin-011.nd2	742.98	680.92	62.06	62.06
11	Ctrl6-2_t48_Myogenin-011.nd2	592.73	515.68	77.05	77.05
14	Ctrl6-2_t48_Myogenin-009.nd2	495.47	621.77	-126.3	0
Fiber No.5
2	Ctrl6-2_t48_Myogenin-015.nd2	1004.93	518.03	486.9	486.9	positive	6	1	16.6667	0.166667
5	Ctrl6-2_t48_Myogenin-015.nd2	561.66	456.06	105.6	105.6
8	Ctrl6-2_t48_Myogenin-014.nd2	811.61	672.66	138.95	138.95
11	Ctrl6-2_t48_Myogenin-014.nd2	774.74	673.62	101.12	101.12
14	Ctrl6-2_t48_Myogenin-013.nd2	895.36	777	118.36	118.36
17	Ctrl6-2_t48_Myogenin-012.nd2	752.61	607.28	145.33	145.33
Fiber No.6
2	Ctrl6-2_t48_Myogenin-019.nd2	898.87	786.08	112.79	112.79		6	0	0	0
5	Ctrl6-2_t48_Myogenin-019.nd2	897.55	799.44	98.11	98.11
8	Ctrl6-2_t48_Myogenin-018.nd2	537.12	545.22	-8.1	0
11	Ctrl6-2_t48_Myogenin-018.nd2	620.75	543.17	77.58	77.58
14	Ctrl6-2_t48_Myogenin-018.nd2	832.26	718.84	113.42	113.42
17	Ctrl6-2_t48_Myogenin-018.nd2	728.8	687.11	41.69	41.69
Fiber No.7
2	Ctrl6-2_t48_Myogenin-022.nd2	747.76	606.48	141.28	141.28		4	1	25	0.25
5	Ctrl6-2_t48_Myogenin-022.nd2	921.26	764.85	156.41	156.41	positive
8	Ctrl6-2_t48_Myogenin-021.nd2	603.79	527.78	76.01	76.01
11	Ctrl6-2_t48_Myogenin-021.nd2	631.22	696.45	-65.23	0
Fiber No.8
2	Ctrl6-2_t48_Myogenin-025.nd2	622.4	614.36	8.04	8.04		6	0	0	0
5	Ctrl6-2_t48_Myogenin-025.nd2	711.86	670.83	41.03	41.03
8	Ctrl6-2_t48_Myogenin-024.nd2	493.66	569.09	-75.43	0
11	Ctrl6-2_t48_Myogenin-024.nd2	478.28	537.53	-59.25	0
14	Ctrl6-2_t48_Myogenin-023.nd2	484.36	386.41	97.95	97.95
17	Ctrl6-2_t48_Myogenin-023.nd2	670.1	589.38	80.72	80.72
Fiber No.9
2	Ctrl6-2_t48_Myogenin-028.nd2	743.64	840.83	-97.19	0		9	0	0	0
5	Ctrl6-2_t48_Myogenin-028.nd2	674.86	942.8	-267.94	0
8	Ctrl6-2_t48_Myogenin-028.nd2	1216.91	1140.22	76.69	76.69
11	Ctrl6-2_t48_Myogenin-028.nd2	898.18	1187.33	-289.15	0
14	Ctrl6-2_t48_Myogenin-028.nd2	710.74	1074.91	-364.17	0
17	Ctrl6-2_t48_Myogenin-028.nd2	866.36	949.96	-83.6	0
20	Ctrl6-2_t48_Myogenin-027.nd2	1315.26	1199.22	116.04	116.04
23	Ctrl6-2_t48_Myogenin-027.nd2	535.97	669.93	-133.96	0
26	Ctrl6-2_t48_Myogenin-026.nd2	1110.36	1059.89	50.47	50.47
Fiber No.10
2	Ctrl6-2_t48_Myogenin-032.nd2	664.16	696.86	-32.7	0		7	1	14.2857	0.142857
5	Ctrl6-2_t48_Myogenin-031.nd2	891.82	732.52	159.3	159.3	positive
8	Ctrl6-2_t48_Myogenin-031.nd2	800.09	659.66	140.43	140.43
11	Ctrl6-2_t48_Myogenin-031.nd2	613.72	726.81	-113.09	0
14	Ctrl6-2_t48_Myogenin-030.nd2	686.48	692.86	-6.38	0
17	Ctrl6-2_t48_Myogenin-029.nd2	602.11	617.08	-14.97	0
20	Ctrl6-2_t48_Myogenin-029.nd2	453.07	561.45	-108.38	0
Fiber No.11
2	Ctrl6-2_t48_Myogenin-036.nd2	553.13	445.59	107.54	107.54		5	0	0	0
5	Ctrl6-2_t48_Myogenin-036.nd2	563.86	416.4	147.46	147.46
8	Ctrl6-2_t48_Myogenin-035.nd2	638	538.44	99.56	99.56
11	Ctrl6-2_t48_Myogenin-034.nd2	478.74	644.46	-165.72	0
14	Ctrl6-2_t48_Myogenin-033.nd2	418.12	480.07	-61.95	0
Fiber No.12
2	Ctrl6-2_t48_Myogenin-037.nd2	522.85	543.63	-20.78	0		2	0	0	0
5	Ctrl6-2_t48_Myogenin-037.nd2	695.96	635.22	60.74	60.74
Fiber No.13
2	Ctrl6-2_t48_Myogenin-039.nd2	920.56	900.96	19.6	19.6		5	0	0	0
5	Ctrl6-2_t48_Myogenin-039.nd2	949.23	929.09	20.14	20.14
8	Ctrl6-2_t48_Myogenin-039.nd2	485.67	872.39	-386.72	0
11	Ctrl6-2_t48_Myogenin-039.nd2	473.3	991.23	-517.93	0
14	Ctrl6-2_t48_Myogenin-039.nd2	479.42	574.28	-94.86	0
Fiber No.14
2	Ctrl6-2_t48_Myogenin-044.nd2	710.23	652.24	57.99	57.99		7	1	14.2857	0.142857
5	Ctrl6-2_t48_Myogenin-043.nd2	681.39	610.81	70.58	70.58
8	Ctrl6-2_t48_Myogenin-042.nd2	601.77	547.25	54.52	54.52
11	Ctrl6-2_t48_Myogenin-041.nd2	591.45	538.83	52.62	52.62
14	Ctrl6-2_t48_Myogenin-040.nd2	806.12	617.9	188.22	188.22	positive
17	Ctrl6-2_t48_Myogenin-040.nd2	788.6	662.69	125.91	125.91
20	Ctrl6-2_t48_Myogenin-040.nd2	779.27	676.84	102.43	102.43
Fiber No.15
2	Ctrl6-2_t48_Myogenin-048.nd2	594.25	515.73	78.52	78.52		9	0	0	0
5	Ctrl6-2_t48_Myogenin-047.nd2	925.67	825.6	100.07	100.07
8	Ctrl6-2_t48_Myogenin-047.nd2	897.64	801.44	96.2	96.2
11	Ctrl6-2_t48_Myogenin-046.nd2	465.43	536.82	-71.39	0
14	Ctrl6-2_t48_Myogenin-045.nd2	650.9	501.97	148.93	148.93
17	Ctrl6-2_t48_Myogenin-045.nd2	655.3	660.13	-4.83	0
20	Ctrl6-2_t48_Myogenin-045.nd2	859.48	789.96	69.52	69.52
23	Ctrl6-2_t48_Myogenin-045.nd2	775.82	722.45	53.37	53.37
26	Ctrl6-2_t48_Myogenin-045.nd2	648.23	746.99	-98.76	0
Fiber No.16
2	Ctrl6-2_t48_Myogenin-051.nd2	720.35	651.68	68.67	68.67		6	0	0	0
5	Ctrl6-2_t48_Myogenin-051.nd2	757.28	655.96	101.32	101.32
8	Ctrl6-2_t48_Myogenin-050.nd2	637.07	592.4	44.67	44.67
11	Ctrl6-2_t48_Myogenin-050.nd2	657.15	628.34	28.81	28.81
14	Ctrl6-2_t48_Myogenin-050.nd2	680.1	564.88	115.22	115.22
17	Ctrl6-2_t48_Myogenin-050.nd2	713.82	601.72	112.1	112.1
Fiber No.17
2	Ctrl6-2_t48_Myogenin-056.nd2	748.17	563.06	185.11	185.11	positive	7	1	14.2857	0.142857
5	Ctrl6-2_t48_Myogenin-056.nd2	722.66	612.1	110.56	110.56
8	Ctrl6-2_t48_Myogenin-056.nd2	709.69	619.18	90.51	90.51
11	Ctrl6-2_t48_Myogenin-055.nd2	622.08	564	58.08	58.08
14	Ctrl6-2_t48_Myogenin-054.nd2	624.79	541.01	83.78	83.78
17	Ctrl6-2_t48_Myogenin-053.nd2	658.05	547.26	110.79	110.79
20	Ctrl6-2_t48_Myogenin-052.nd2	680.08	629.5	50.58	50.58
					Total		98	8

## Sheet: Expt3_MyoG
Item	Source	Myogenin (TxRed) Mean Intensity	TxRed Background intensity	Myogenin intensity- Background intensity	Corrected minus to zeros		# of stem cells	# of myoG+ SCs	% myogenin +/ fiber	Fraction of SCs marked with MyoG		Total % myogenin positive
Fiber No.1
2	Expt3_t48_Myogenin-002.nd2	850.33	790.87	59.46	59.46		3	0	0	0		44.2308
5	Expt3_t48_Myogenin-002.nd2	863.91	811.81	52.1	52.1
8	Expt3_t48_Myogenin-002.nd2	423.36	607.65	-184.29	0
Fiber No.2
				0	0		0	0	#DIV/0!	#DIV/0!
Fiber No.3
2	Expt3_t48_Myogenin-004.nd2	404.83	413.49	-8.66	0		3	2	66.6667	0.666667
5	Expt3_t48_Myogenin-003.nd2	823.35	472.36	350.99	350.99	positive
8	Expt3_t48_Myogenin-003.nd2	609.89	399.22	210.67	210.67	positive
Fiber No.4
				0	0		0	0	#DIV/0!	#DIV/0!
Fiber No.5
2	Expt3_t48_Myogenin-007.nd2	418.29	627.17	-208.88	0		6	2	33.3333	0.333333
5	Expt3_t48_Myogenin-007.nd2	832.35	801.29	31.06	31.06
8	Expt3_t48_Myogenin-007.nd2	835.83	781.26	54.57	54.57
11	Expt3_t48_Myogenin-006.nd2	875.61	797.26	78.35	78.35
14	Expt3_t48_Myogenin-006.nd2	1339.69	1079.82	259.87	259.87	positive
17	Expt3_t48_Myogenin-006.nd2	1199.63	951.07	248.56	248.56	positive
Fiber No.6
2	Expt3_t48_Myogenin-012.nd2	559.64	710	-150.36	0		13	3	23.0769	0.230769
5	Expt3_t48_Myogenin-012.nd2	911.31	686.18	225.13	225.13	positive
8	Expt3_t48_Myogenin-012.nd2	692.73	953.35	-260.62	0
11	Expt3_t48_Myogenin-012.nd2	664.85	597.07	67.78	67.78
14	Expt3_t48_Myogenin-012.nd2	628.17	606.11	22.06	22.06
17	Expt3_t48_Myogenin-010.nd2	560.32	558.06	2.26	2.26
20	Expt3_t48_Myogenin-010.nd2	633.62	621.07	12.55	12.55
23	Expt3_t48_Myogenin-009.nd2	735.42	599.43	135.99	135.99
26	Expt3_t48_Myogenin-009.nd2	780.11	643.14	136.97	136.97
29	Expt3_t48_Myogenin-009.nd2	1031.35	989.7	41.65	41.65
32	Expt3_t48_Myogenin-009.nd2	846.87	603.78	243.09	243.09	positive
35	Expt3_t48_Myogenin-008.nd2	940.82	705.43	235.39	235.39	positive
38	Expt3_t48_Myogenin-008.nd2	696.35	657.63	38.72	38.72
Fiber No.7
2	Expt3_t48_Myogenin-015.nd2	499.99	488.81	11.18	11.18		5	0	0	0
5	Expt3_t48_Myogenin-015.nd2	487.16	501.97	-14.81	0
8	Expt3_t48_Myogenin-014.nd2	582.04	498.71	83.33	83.33
11	Expt3_t48_Myogenin-013.nd2	768.24	670.57	97.67	97.67
14	Expt3_t48_Myogenin-013.nd2	797.21	648.75	148.46	148.46
Fiber No.8
2	Expt3_t48_Myogenin-017.nd2	1255.17	981.31	273.86	273.86	positive	10	9	90	0.9
5	Expt3_t48_Myogenin-017.nd2	1226.61	901.19	325.42	325.42	positive
8	Expt3_t48_Myogenin-017.nd2	1295.67	904.23	391.44	391.44	positive
11	Expt3_t48_Myogenin-017.nd2	1174.24	978.17	196.07	196.07	positive
14	Expt3_t48_Myogenin-017.nd2	1236.38	948.37	288.01	288.01	positive
17	Expt3_t48_Myogenin-017.nd2	1627.88	790.94	836.94	836.94	positive
20	Expt3_t48_Myogenin-017.nd2	1468.52	737.22	731.3	731.3	positive
23	Expt3_t48_Myogenin-017.nd2	1530.47	1031.26	499.21	499.21	positive
26	Expt3_t48_Myogenin-017.nd2	1093.71	812.25	281.46	281.46	positive
29	Expt3_t48_Myogenin-016.nd2	844.19	796.11	48.08	48.08
Fiber No.9
2	Expt3_t48_Myogenin-019.nd2	1434.74	1384.03	50.71	50.71		7	5	71.4286	0.714286
5	Expt3_t48_Myogenin-019.nd2	1482.48	1132.54	349.94	349.94	positive
8	Expt3_t48_Myogenin-019.nd2	1536.01	1169.81	366.2	366.2	positive
11	Expt3_t48_Myogenin-019.nd2	1469.11	1281.61	187.5	187.5	positive
14	Expt3_t48_Myogenin-019.nd2	1532.89	1403.89	129	129
17	Expt3_t48_Myogenin-019.nd2	1427.59	1167.34	260.25	260.25	positive
20	Expt3_t48_Myogenin-019.nd2	1854.06	1047.25	806.81	806.81	positive
Fiber No.10
				0	0		0	0	#DIV/0!	#DIV/0!
Fiber No.11
2	Expt3_t48_Myogenin-020.nd2	617.35	595.56	21.79	21.79		3	1	33.3333	0.333333
8	Expt3_t48_Myogenin-020.nd2	592.59	433.05	159.54	159.54	positive
11	Expt3_t48_Myogenin-020.nd2	425.75	444.74	-18.99	0
Fiber No.12
2	Expt3_t48_Myogenin-024.nd2	864.63	860.89	3.74	3.74		5	2	40	0.4
5	Expt3_t48_Myogenin-023.nd2	941.02	741.48	199.54	199.54	positive
8	Expt3_t48_Myogenin-021.nd2	790.38	882.7	-92.32	0
11	Expt3_t48_Myogenin-021.nd2	1419.26	1198.86	220.4	220.4	positive
14	Expt3_t48_Myogenin-022.nd2	1158.06	1049.03	109.03	109.03
Fiber No.13
2	Expt3_t48_Myogenin-028.nd2	755.01	663.72	91.29	91.29		5	2	40	0.4
5	Expt3_t48_Myogenin-027.nd2	549.17	714.96	-165.79	0
8	Expt3_t48_Myogenin-026.nd2	1095.61	880.7	214.91	214.91	positive
11	Expt3_t48_Myogenin-026.nd2	1069.49	1090.29	-20.8	0
14	Expt3_t48_Myogenin-025.nd2	826.53	653.02	173.51	173.51	positive
Fiber No.14
2	Expt3_t48_Myogenin-029.nd2	1349.3	844.18	505.12	505.12	positive	1	1	100	1
Fiber No.15
				0	0		0	0	#DIV/0!	#DIV/0!
Fiber No.16
2	Expt3_t48_Myogenin-030.nd2	1039.82	770.99	268.83	268.83	positive	3	3	100	1
5	Expt3_t48_Myogenin-030.nd2	1662.58	844.56	818.02	818.02	positive
8	Expt3_t48_Myogenin-031.nd2	965.01	775.5	189.51	189.51	positive
Fiber No.17
2	Expt3_t48_Myogenin-036.nd2	1096.26	1083.37	12.89	12.89		11	4	36.3636	0.363636
5	Expt3_t48_Myogenin-035.nd2	1108.59	1028.02	80.57	80.57
8	Expt3_t48_Myogenin-034.nd2	1099.85	830.86	268.99	268.99	positive
11	Expt3_t48_Myogenin-034.nd2	1152.58	876.41	276.17	276.17	positive
14	Expt3_t48_Myogenin-033.nd2	1006.28	925.74	80.54	80.54
17	Expt3_t48_Myogenin-033.nd2	854.94	785.95	68.99	68.99
20	Expt3_t48_Myogenin-033.nd2	1160.41	1029.22	131.19	131.19
23	Expt3_t48_Myogenin-033.nd2	898.46	1077.61	-179.15	0
26	Expt3_t48_Myogenin-033.nd2	1203.1	1009.13	193.97	193.97	positive
29	Expt3_t48_Myogenin-032.nd2	1186.27	1007.06	179.21	179.21	positive
32	Expt3_t48_Myogenin-032.nd2	1166.34	926.72	239.62	239.62	positive
Fiber No.18
				0	0		0	0	#DIV/0!	#DIV/0!
Fiber No.19
2	Expt3_t48_Myogenin-037.nd2	829.42	727.78	101.64	101.64		1	0	0	0
Fiber No.20
2	Expt3_t48_Myogenin-040.nd2	889.9	862.73	27.17	27.17		6	1	16.6667	0.166667
5	Expt3_t48_Myogenin-040.nd2	679.37	642.6	36.77	36.77
8	Expt3_t48_Myogenin-040.nd2	641.25	578.34	62.91	62.91
11	Expt3_t48_Myogenin-039.nd2	824.79	1080.1	-255.31	0
14	Expt3_t48_Myogenin-039.nd2	1551.91	918.35	633.56	633.56	positive
17	Expt3_t48_Myogenin-038.nd2	710.59	765.19	-54.6	0
Fiber No.21
2	Expt3_t48_Myogenin-056.nd2	1576.05	1567.84	8.21	8.21		9	2	22.2222	0.222222
5	Expt3_t48_Myogenin-055.nd2	1390.68	1337.28	53.4	53.4
8	Expt3_t48_Myogenin-055.nd2	1902.55	1618.97	283.58	283.58	positive
11	Expt3_t48_Myogenin-055.nd2	1559.97	1956.79	-396.82	0
14	Expt3_t48_Myogenin-055.nd2	1947.57	1915.22	32.35	32.35
17	Expt3_t48_Myogenin-055.nd2	1976.87	1767.15	209.72	209.72	positive
20	Expt3_t48_Myogenin-053.nd2	787.59	1167.02	-379.43	0
23	Expt3_t48_Myogenin-053.nd2	1350.88	1361.84	-10.96	0
26	Expt3_t48_Myogenin-053.nd2	1176.58	1040.01	136.57	136.57
Fiber No.22
2	Expt3_t48_Myogenin-044.nd2	664.84	605.38	59.46	59.46		9	1	11.1111	0.111111
5	Expt3_t48_Myogenin-043.nd2	748.12	809.93	-61.81	0
8	Expt3_t48_Myogenin-043.nd2	755.38	885.16	-129.78	0
11	Expt3_t48_Myogenin-042.nd2	1014.11	1140.21	-126.1	0
14	Expt3_t48_Myogenin-042.nd2	1414.26	1191.92	222.34	222.34	positive
17	Expt3_t48_Myogenin-042.nd2	594.84	607.36	-12.52	0
20	Expt3_t48_Myogenin-042.nd2	359.98	611.36	-251.38	0
23	Expt3_t48_Myogenin-041.nd2	996.26	882.87	113.39	113.39
26	Expt3_t48_Myogenin-041.nd2	1089.46	980.24	109.22	109.22
Fiber No.23
2	Expt3_t48_Myogenin-045.nd2	944.97	1473.69	-528.72	0		3	0	0	0
5	Expt3_t48_Myogenin-045.nd2	1185.63	1613.77	-428.14	0
8	Expt3_t48_Myogenin-045.nd2	805.67	1180.05	-374.38	0
Fiber No.24
2	Expt3_t48_Myogenin-048.nd2	623.94	679.86	-55.92	0		3	1	33.3333	0.333333
5	Expt3_t48_Myogenin-047.nd2	877.19	599.31	277.88	277.88	positive
8	Expt3_t48_Myogenin-046.nd2	857.08	756.01	101.07	101.07
Fiber No.25
29	Expt3_t48_Myogenin-053.nd2	914.13	1254.56	-340.43	0		9	5	55.5556	0.555556
32	Expt3_t48_Myogenin-053.nd2	1261.68	1211.44	50.24	50.24
35	Expt3_t48_Myogenin-053.nd2	1049.72	1002.05	47.67	47.67
38	Expt3_t48_Myogenin-052.nd2	892.33	1099.19	-206.86	0
41	Expt3_t48_Myogenin-051.nd2	1094.39	913.74	180.65	180.65	positive
44	Expt3_t48_Myogenin-051.nd2	1064.18	826.97	237.21	237.21	positive
47	Expt3_t48_Myogenin-051.nd2	909.27	752.87	156.4	156.4	positive
50	Expt3_t48_Myogenin-051.nd2	1046.07	895.31	150.76	150.76	positive
53	Expt3_t48_Myogenin-049.nd2	1000.62	838.78	161.84	161.84	positive
Fiber No.26
2	Expt3_t48_Myogenin-059.nd2	945.19	943.34	1.85	1.85		3	1	33.3333	0.333333
5	Expt3_t48_Myogenin-058.nd2	1132.72	827.01	305.71	305.71	positive
8	Expt3_t48_Myogenin-057.nd2	751.56	706.88	44.68	44.68
Fiber No.27
2	Expt3_t48_Myogenin-062.nd2	894.51	916.74	-22.23	0		5	4	80	0.8
7	Expt3_t48_Myogenin-061.nd2	1161.47	997.55	163.92	163.92	positive
10	Expt3_t48_Myogenin-061.nd2	1649.75	874.88	774.87	774.87	positive
13	Expt3_t48_Myogenin-060.nd2	2943.57	1385.36	1558.21	1558.21	positive
16	Expt3_t48_Myogenin-060.nd2	1041.66	845.85	195.81	195.81	positive
Fiber No.28
2	Expt3_t48_Myogenin-066.nd2	1610.59	747.29	863.3	863.3	positive	8	5	62.5	0.625
5	Expt3_t48_Myogenin-066.nd2	1016.17	738.6	277.57	277.57	positive
8	Expt3_t48_Myogenin-066.nd2	478.07	558.65	-80.58	0
11	Expt3_t48_Myogenin-066.nd2	403.56	751.34	-347.78	0
14	Expt3_t48_Myogenin-065.nd2	777.08	614.92	162.16	162.16	positive
17	Expt3_t48_Myogenin-065.nd2	875.18	590.17	285.01	285.01	positive
20	Expt3_t48_Myogenin-064.nd2	1194.26	597.04	597.22	597.22	positive
23	Expt3_t48_Myogenin-063.nd2	533.14	466.78	66.36	66.36
Fiber No.29
2	Expt3_t48_Myogenin-068.nd2	947.63	715.23	232.4	232.4	positive	10	8	80	0.8
5	Expt3_t48_Myogenin-068.nd2	984.21	893.09	91.12	91.12
8	Expt3_t48_Myogenin-068.nd2	985.21	555.82	429.39	429.39	positive
11	Expt3_t48_Myogenin-068.nd2	989.34	742.8	246.54	246.54	positive
14	Expt3_t48_Myogenin-068.nd2	591.23	738.93	-147.7	0
17	Expt3_t48_Myogenin-067.nd2	1315.95	828.68	487.27	487.27	positive
20	Expt3_t48_Myogenin-067.nd2	1744.64	926.1	818.54	818.54	positive
23	Expt3_t48_Myogenin-067.nd2	921.88	592.26	329.62	329.62	positive
26	Expt3_t48_Myogenin-067.nd2	946.42	541.22	405.2	405.2	positive
29	Expt3_t48_Myogenin-067.nd2	998.04	584.75	413.29	413.29	positive
Fiber No.30
35	Expt3_t48_Myogenin-071.nd2	682.91	694.58	-11.67	0		4	2	50	0.5
38	Expt3_t48_Myogenin-070.nd2	2259.97	901.48	1358.49	1358.49	positive
41	Expt3_t48_Myogenin-070.nd2	2248.21	1028.87	1219.34	1219.34	positive
44	Expt3_t48_Myogenin-069.nd2	872.01	748.14	123.87	123.87
Fiber No.31
2	Expt3_t48_Myogenin-075.nd2	960.1	840.89	119.21	119.21		11	5	45.4545	0.454545
5	Expt3_t48_Myogenin-075.nd2	981.4	770.84	210.56	210.56	positive
8	Expt3_t48_Myogenin-075.nd2	751.95	744.05	7.9	7.9
11	Expt3_t48_Myogenin-074.nd2	682.52	522.22	160.3	160.3	positive
14	Expt3_t48_Myogenin-072.nd2	800.41	588.7	211.71	211.71	positive
17	Expt3_t48_Myogenin-072.nd2	719.38	602.3	117.08	117.08
20	Expt3_t48_Myogenin-072.nd2	1326.96	1141.35	185.61	185.61	positive
23	Expt3_t48_Myogenin-072.nd2	993.03	723.29	269.74	269.74	positive
26	Expt3_t48_Myogenin-072.nd2	695.02	674.44	20.58	20.58
29	Expt3_t48_Myogenin-073.nd2	834.12	697.86	136.26	136.26
32	Expt3_t48_Myogenin-073.nd2	823.21	749.67	73.54	73.54
					Total		156	69

## Sheet: Expt4_MyoG
Item	Source	Myogenin (TxRed) Mean Intensity	TxRed Background intensity	Myogenin intensity- Background intensity	Corrected minus to zeros		# of stem cells	# of myoG+ SCs	% myogenin +/ fiber	Fraction of SCs marked with MyoG		Total % myogenin positive
Fiber No.1
2	Expt4_t48_Myogenin-002.nd2	518.83	464.06	54.77	54.77		5	1	20	0.2		42.2222
5	Expt4_t48_Myogenin-002.nd2	801.94	688.78	113.16	113.16
8	Expt4_t48_Myogenin-002.nd2	362.64	435.2	-72.56	0
11	Expt4_t48_Myogenin-001.nd2	826.43	851.22	-24.79	0
14	Expt4_t48_Myogenin-001.nd2	1277.7	955.7	322	322	positive
Fiber No.2
2	Expt4_t48_Myogenin-005.nd2	679.99	733.77	-53.78	0		5	1	20	0.2
5	Expt4_t48_Myogenin-005.nd2	713.85	718.55	-4.7	0
8	Expt4_t48_Myogenin-005.nd2	949.07	860.49	88.58	88.58
11	Expt4_t48_Myogenin-005.nd2	873.25	712.6	160.65	160.65	positive
14	Expt4_t48_Myogenin-003.nd2	829.6	733.86	95.74	95.74
Fiber No.3
				0	0		0	0	#DIV/0!	#DIV/0!
Fiber No.4
2	Expt4_t48_Myogenin-006.nd2	900.27	805.13	95.14	95.14		1	0	0	0
Fiber No.5
2	Expt4_t48_Myogenin-008.nd2	969	943.65	25.35	25.35		3	0	0	0
5	Expt4_t48_Myogenin-008.nd2	933.93	1080.76	-146.83	0
8	Expt4_t48_Myogenin-007.nd2	374.95	912.11	-537.16	0
Fiber No.6
				0	0		0	0	#DIV/0!	#DIV/0!
Fiber No.7
2	Expt4_t48_Myogenin-012.nd2	807.48	1159.96	-352.48	0		6	1	16.6667	0.166667
5	Expt4_t48_Myogenin-012.nd2	929.52	1099.11	-169.59	0
8	Expt4_t48_Myogenin-011.nd2	2126.77	1123.73	1003.04	1003.04	positive
11	Expt4_t48_Myogenin-011.nd2	757.59	1063.79	-306.2	0
14	Expt4_t48_Myogenin-011.nd2	733.56	963.13	-229.57	0
17	Expt4_t48_Myogenin-010.nd2	998.6	1208.75	-210.15	0
Fiber No.8
2	Expt4_t48_Myogenin-015.nd2	747.84	647.57	100.27	100.27		6	5	83.3333	0.833333
5	Expt4_t48_Myogenin-014.nd2	1140.22	815.23	324.99	324.99	positive
8	Expt4_t48_Myogenin-013.nd2	990.5	802.94	187.56	187.56	positive
11	Expt4_t48_Myogenin-013.nd2	871.05	688.96	182.09	182.09	positive
14	Expt4_t48_Myogenin-013.nd2	958.33	801.25	157.08	157.08	positive
17	Expt4_t48_Myogenin-013.nd2	938.81	787.86	150.95	150.95	positive
Fiber No.9
2	Expt4_t48_Myogenin-017.nd2	610.89	844.97	-234.08	0		9	3	33.3333	0.333333
5	Expt4_t48_Myogenin-017.nd2	888.66	943.76	-55.1	0
8	Expt4_t48_Myogenin-017.nd2	876.06	1013.32	-137.26	0
11	Expt4_t48_Myogenin-016.nd2	772.45	759.12	13.33	13.33
14	Expt4_t48_Myogenin-016.nd2	677.4	722.73	-45.33	0
17	Expt4_t48_Myogenin-018.nd2	1341.14	1269.89	71.25	71.25
20	Expt4_t48_Myogenin-018.nd2	1641.61	1161.58	480.03	480.03	positive
23	Expt4_t48_Myogenin-018.nd2	2064.43	1221.71	842.72	842.72	positive
26	Expt4_t48_Myogenin-018.nd2	1856.15	1159.32	696.83	696.83	positive
Fiber No.10
2	Expt4_t48_Myogenin-022.nd2	1349.42	1115.71	233.71	233.71	positive	8	5	62.5	0.625
5	Expt4_t48_Myogenin-021.nd2	1375.7	1471.49	-95.79	0
8	Expt4_t48_Myogenin-021.nd2	1167.86	1266.26	-98.4	0
11	Expt4_t48_Myogenin-020.nd2	1417.04	1180.16	236.88	236.88	positive
14	Expt4_t48_Myogenin-019.nd2	1735.03	1292.56	442.47	442.47	positive
17	Expt4_t48_Myogenin-019.nd2	1557.96	1338.33	219.63	219.63	positive
20	Expt4_t48_Myogenin-019.nd2	1087.59	1206.48	-118.89	0
23	Expt4_t48_Myogenin-019.nd2	2964.36	1564.39	1399.97	1399.97	positive
Fiber No.11
2	Expt4_t48_Myogenin-024.nd2	846.5	737.6	108.9	108.9		6	3	50	0.5
5	Expt4_t48_Myogenin-023.nd2	1976.62	685.64	1290.98	1290.98	positive
8	Expt4_t48_Myogenin-023.nd2	669.92	664.96	4.96	4.96
11	Expt4_t48_Myogenin-023.nd2	806.81	620.82	185.99	185.99	positive
14	Expt4_t48_Myogenin-023.nd2	1003.79	718.34	285.45	285.45	positive
17	Expt4_t48_Myogenin-023.nd2	904.75	885.54	19.21	19.21
Fiber No.12
				0	0		0	0	#DIV/0!	#DIV/0!
Fiber No.13
38	Expt4_t48_Myogenin-034.nd2	857.67	797.68	59.99	59.99		11	4	36.3636	0.363636
41	Expt4_t48_Myogenin-034.nd2	874.15	894.53	-20.38	0
44	Expt4_t48_Myogenin-034.nd2	701.24	860.75	-159.51	0
47	Expt4_t48_Myogenin-034.nd2	417.51	450.28	-32.77	0
50	Expt4_t48_Myogenin-034.nd2	488.72	630.22	-141.5	0
53	Expt4_t48_Myogenin-032.nd2	675.3	636.81	38.49	38.49
56	Expt4_t48_Myogenin-031.nd2	759.39	629.25	130.14	130.14
59	Expt4_t48_Myogenin-030.nd2	909.15	731.75	177.4	177.4	positive
62	Expt4_t48_Myogenin-030.nd2	997.93	747.11	250.82	250.82	positive
65	Expt4_t48_Myogenin-030.nd2	1010.24	718.63	291.61	291.61	positive
68	Expt4_t48_Myogenin-030.nd2	1057.44	676.58	380.86	380.86	positive
Fiber No.14
2	Expt4_t48_Myogenin-029.nd2	589.05	684.15	-95.1	0		8	1	12.5	0.125
5	Expt4_t48_Myogenin-029.nd2	363.64	547.71	-184.07	0
8	Expt4_t48_Myogenin-028.nd2	911.67	852.83	58.84	58.84
11	Expt4_t48_Myogenin-028.nd2	1031.02	1126.52	-95.5	0
14	Expt4_t48_Myogenin-028.nd2	944.6	742.22	202.38	202.38	positive
17	Expt4_t48_Myogenin-028.nd2	987.83	1028.45	-40.62	0
20	Expt4_t48_Myogenin-027.nd2	795.51	1016.92	-221.41	0
23	Expt4_t48_Myogenin-027.nd2	1049.05	1035.86	13.19	13.19
Fiber No.15
2	Expt4_t48_Myogenin-037.nd2	886.68	826.25	60.43	60.43		12	9	75	0.75
5	Expt4_t48_Myogenin-037.nd2	896.65	769.18	127.47	127.47
8	Expt4_t48_Myogenin-037.nd2	703.81	524.35	179.46	179.46	positive
11	Expt4_t48_Myogenin-037.nd2	893.36	706.86	186.5	186.5	positive
14	Expt4_t48_Myogenin-037.nd2	975.52	653.85	321.67	321.67	positive
17	Expt4_t48_Myogenin-037.nd2	975.18	772.01	203.17	203.17	positive
20	Expt4_t48_Myogenin-036.nd2	894.37	831.4	62.97	62.97
23	Expt4_t48_Myogenin-036.nd2	1040.31	825.52	214.79	214.79	positive
26	Expt4_t48_Myogenin-036.nd2	1159.33	976.49	182.84	182.84	positive
29	Expt4_t48_Myogenin-036.nd2	1074.8	879.54	195.26	195.26	positive
32	Expt4_t48_Myogenin-036.nd2	830.3	630.35	199.95	199.95	positive
35	Expt4_t48_Myogenin-036.nd2	1095.01	919.12	175.89	175.89	positive
Fiber No.16
2	Expt4_t48_Myogenin-041.nd2	668.28	709.23	-40.95	0		15	5	33.3333	0.333333
5	Expt4_t48_Myogenin-041.nd2	949.1	1072.66	-123.56	0
8	Expt4_t48_Myogenin-041.nd2	877.97	724.7	153.27	153.27	positive
11	Expt4_t48_Myogenin-040.nd2	819.28	753.07	66.21	66.21
14	Expt4_t48_Myogenin-039.nd2	543.46	735.35	-191.89	0
17	Expt4_t48_Myogenin-039.nd2	660.8	829.69	-168.89	0
20	Expt4_t48_Myogenin-039.nd2	792.59	974.65	-182.06	0
23	Expt4_t48_Myogenin-039.nd2	712.42	912.88	-200.46	0
26	Expt4_t48_Myogenin-038.nd2	1453.78	1078.76	375.02	375.02	positive
29	Expt4_t48_Myogenin-038.nd2	1190.23	1084.55	105.68	105.68
32	Expt4_t48_Myogenin-038.nd2	1285.03	1051.04	233.99	233.99	positive
35	Expt4_t48_Myogenin-038.nd2	1131.88	912.83	219.05	219.05	positive
38	Expt4_t48_Myogenin-038.nd2	1326.71	1000.36	326.35	326.35	positive
41	Expt4_t48_Myogenin-038.nd2	1159.48	1100.85	58.63	58.63
44	Expt4_t48_Myogenin-038.nd2	1006.74	897.4	109.34	109.34
Fiber No.17
2	Expt4_t48_Myogenin-046.nd2	962.54	703.6	258.94	258.94	positive	11	4	36.3636	0.363636
5	Expt4_t48_Myogenin-046.nd2	1081.86	726.87	354.99	354.99	positive
8	Expt4_t48_Myogenin-044.nd2	1016.89	943.75	73.14	73.14
11	Expt4_t48_Myogenin-044.nd2	1078.05	903.65	174.4	174.4	positive
14	Expt4_t48_Myogenin-044.nd2	836.08	811.44	24.64	24.64
17	Expt4_t48_Myogenin-043.nd2	1118.86	1031.03	87.83	87.83
20	Expt4_t48_Myogenin-042.nd2	2435.44	894.74	1540.7	1540.7	positive
23	Expt4_t48_Myogenin-045.nd2	453.14	424.71	28.43	28.43
26	Expt4_t48_Myogenin-045.nd2	878.78	758.07	120.71	120.71
29	Expt4_t48_Myogenin-045.nd2	934.98	828.88	106.1	106.1
32	Expt4_t48_Myogenin-045.nd2	938.84	852.26	86.58	86.58
Fiber No.18
2	Expt4_t48_Myogenin-048.nd2	2191.23	987.1	1204.13	1204.13	positive	3	2	66.6667	0.666667
5	Expt4_t48_Myogenin-047.nd2	633.93	592.17	41.76	41.76
8	Expt4_t48_Myogenin-047.nd2	978.13	497	481.13	481.13	positive
Fiber No.19
2	Expt4_t48_Myogenin-051.nd2	1387.67	1405.41	-17.74	0		2	0	0	0
5	Expt4_t48_Myogenin-050.nd2	942.35	1117.55	-175.2	0
Fiber No.20
2	Expt4_t48_Myogenin-054.nd2	1463.71	1189.49	274.22	274.22	positive	8	3	37.5	0.375
5	Expt4_t48_Myogenin-054.nd2	1505.59	1413.79	91.8	91.8
8	Expt4_t48_Myogenin-054.nd2	1594.06	1655.72	-61.66	0
11	Expt4_t48_Myogenin-053.nd2	1383.16	1283.67	99.49	99.49
14	Expt4_t48_Myogenin-053.nd2	1386.39	1201.38	185.01	185.01	positive
17	Expt4_t48_Myogenin-052.nd2	989.02	851.96	137.06	137.06
20	Expt4_t48_Myogenin-052.nd2	1748.68	1064.5	684.18	684.18	positive
23	Expt4_t48_Myogenin-052.nd2	530.18	691.77	-161.59	0
Fiber No.21
2	Expt4_t48_Myogenin-057.nd2	821.25	729.15	92.1	92.1		6	3	50	0.5
5	Expt4_t48_Myogenin-056.nd2	690.87	576.18	114.69	114.69
8	Expt4_t48_Myogenin-056.nd2	905.86	694.13	211.73	211.73	positive
11	Expt4_t48_Myogenin-056.nd2	682.87	622.96	59.91	59.91
14	Expt4_t48_Myogenin-055.nd2	982.53	618.37	364.16	364.16	positive
17	Expt4_t48_Myogenin-055.nd2	1124.42	776.18	348.24	348.24	positive
Fiber No.22
2	Expt4_t48_Myogenin-060.nd2	1492.11	1269.53	222.58	222.58	positive	7	5	71.4286	0.714286
5	Expt4_t48_Myogenin-060.nd2	1256.88	1035.09	221.79	221.79	positive
8	Expt4_t48_Myogenin-060.nd2	1354.05	827.31	526.74	526.74	positive
11	Expt4_t48_Myogenin-060.nd2	637.25	634.41	2.84	2.84
14	Expt4_t48_Myogenin-059.nd2	1024.17	857.81	166.36	166.36	positive
17	Expt4_t48_Myogenin-059.nd2	707.44	544	163.44	163.44	positive
20	Expt4_t48_Myogenin-059.nd2	784.02	656.8	127.22	127.22
Fiber No.23
2	Expt4_t48_Myogenin-064.nd2	830.32	736.54	93.78	93.78		8	5	62.5	0.625
5	Expt4_t48_Myogenin-063.nd2	1158.03	771.25	386.78	386.78	positive
8	Expt4_t48_Myogenin-062.nd2	754.6	783.95	-29.35	0
11	Expt4_t48_Myogenin-062.nd2	992.65	978.56	14.09	14.09
14	Expt4_t48_Myogenin-062.nd2	1294.65	895.86	398.79	398.79	positive
17	Expt4_t48_Myogenin-062.nd2	1332.68	1079.32	253.36	253.36	positive
20	Expt4_t48_Myogenin-061.nd2	1146.79	626.47	520.32	520.32	positive
23	Expt4_t48_Myogenin-062.nd2	931.9	723.43	208.47	208.47	positive
Fiber No.24
2	Expt4_t48_Myogenin-065.nd2	1187.44	899.77	287.67	287.67	positive	2	2	100	1
5	Expt4_t48_Myogenin-065.nd2	1295.74	733.01	562.73	562.73	positive
Fiber No.25
2	Expt4_t48_Myogenin-067.nd2	909.87	847.21	62.66	62.66		3	1	33.3333	0.333333
5	Expt4_t48_Myogenin-067.nd2	951.75	899.63	52.12	52.12
8	Expt4_t48_Myogenin-067.nd2	1048.38	628.26	420.12	420.12	positive
Fiber no.26
2	Expt4_t48_Myogenin-073.nd2	860.31	572.66	287.65	287.65	positive	16	5	31.25	0.3125
5	Expt4_t48_Myogenin-073.nd2	877.59	638.96	238.63	238.63	positive
8	Expt4_t48_Myogenin-072.nd2	639.22	595.36	43.86	43.86
11	Expt4_t48_Myogenin-072.nd2	719.25	630.55	88.7	88.7
14	Expt4_t48_Myogenin-072.nd2	599.69	549.07	50.62	50.62
17	Expt4_t48_Myogenin-072.nd2	569	428.93	140.07	140.07
20	Expt4_t48_Myogenin-072.nd2	567.49	477.37	90.12	90.12
23	Expt4_t48_Myogenin-070.nd2	546	579.92	-33.92	0
26	Expt4_t48_Myogenin-070.nd2	645.31	602.03	43.28	43.28
29	Expt4_t48_Myogenin-070.nd2	718.55	637.2	81.35	81.35
32	Expt4_t48_Myogenin-070.nd2	476.04	529.3	-53.26	0
35	Expt4_t48_Myogenin-070.nd2	483.86	527.84	-43.98	0
38	Expt4_t48_Myogenin-068.nd2	869.47	565.96	303.51	303.51	positive
41	Expt4_t48_Myogenin-068.nd2	1017.16	612.7	404.46	404.46	positive
44	Expt4_t48_Myogenin-068.nd2	1074.32	788.11	286.21	286.21	positive
47	Expt4_t48_Myogenin-068.nd2	709.8	590.68	119.12	119.12
Fiber No.27
2	Expt4_t48_Myogenin-075.nd2	1263.43	511.95	751.48	751.48	positive	4	2	50	0.5
5	Expt4_t48_Myogenin-075.nd2	1747.04	620.57	1126.47	1126.47	positive
8	Expt4_t48_Myogenin-074.nd2	653.12	529.4	123.72	123.72
11	Expt4_t48_Myogenin-074.nd2	610.07	653.35	-43.28	0
Fiber No.28
2	Expt4_t48_Myogenin-076.nd2	823.45	774.93	48.52	48.52		8	4	50	0.5
5	Expt4_t48_Myogenin-076.nd2	706.54	674.81	31.73	31.73
8	Expt4_t48_Myogenin-076.nd2	860.75	767.6	93.15	93.15
11	Expt4_t48_Myogenin-077.nd2	920.99	765.33	155.66	155.66	positive
14	Expt4_t48_Myogenin-077.nd2	1122.52	732.6	389.92	389.92	positive
17	Expt4_t48_Myogenin-077.nd2	1108	493.15	614.85	614.85	positive
20	Expt4_t48_Myogenin-077.nd2	1215.49	828.63	386.86	386.86	positive
23	Expt4_t48_Myogenin-077.nd2	732.22	658.05	74.17	74.17
Fiber No.29
2	Expt4_t48_Myogenin-081.nd2	555.21	658.03	-102.82	0		7	2	28.5714	0.285714
5	Expt4_t48_Myogenin-081.nd2	295.08	441.36	-146.28	0
8	Expt4_t48_Myogenin-080.nd2	930.9	825.26	105.64	105.64
11	Expt4_t48_Myogenin-080.nd2	1020.93	797.57	223.36	223.36	positive
14	Expt4_t48_Myogenin-079.nd2	783.82	618.32	165.5	165.5	positive
17	Expt4_t48_Myogenin-078.nd2	464.58	573.14	-108.56	0
20	Expt4_t48_Myogenin-078.nd2	457.83	650.27	-192.44	0
					Total		180	76
