# Supplementary material for: Heterogeneous levels of delta-like 4 within a multinucleated niche cell maintains muscle stem cell diversity
Source: eLife. 2022 Dec 30;11:e68180. doi: 10.7554/eLife.68180 (PMC9803355; doi:10.7554/eLife.68180)
Supplement: Figure 7—source data 5. [file elife-68180-fig7-data5.xlsx]

## Sheet: Ctrl2_060915
Mib1f/f			Ctrl 2
30d chase after tmx
Injury & 14d regeneration
Cross Sectional Area of Injured Fibers
	Area (μm2)
1	2735
2	792
3	623
4	338
5	925
6	1848
7	159
8	1268
9	642
10	221
11	202
12	198
13	57
14	183
15	1878
16	218
17	1381
18	2719
19	658
20	2677
21	186
22	289
23	1393
24	84
25	393
26	388
27	1109
28	1262
29	98
30	95
31	46
32	209
33	1156
34	2272
35	559
36	228
37	798
38	139
39	938
40	1225
41	178
42	144
43	583
44	1213
45	397
46	640
47	876
48	148
49	193
50	141
51	1174
52	78
53	804
54	134
55	1976
56	2151
57	248
58	297
59	416
60	139
61	397
62	1601
63	570
64	576
65	1897
66	1411
67	908
68	248
69	201
70	73
71	221
72	682
73	319
74	297
75	295
76	564
77	603
78	80
79	198
80	1086
81	403
82	328
83	1001
84	343
85	180
86	38
87	39
88	375
89	1734
90	1017
91	1801
92	2319
93	795
94	401
95	425
96	478
97	1011
98	316
99	371
100	820
101	131
102	1379
103	2251
104	297
105	152
106	270
107	2022
108	403
109	309
110	3306
111	1448
112	813
113	1431
114	313
115	2209
116	1504
117	1551
118	269
119	1667
120	111
121	681
122	737
123	1625
124	1199
125	1232
126	1265
127	387
128	2324
129	1158
130	893
131	610
132	1017
133	1008
134	539
135	2895
136	737
137	1002
138	293
139	385
140	459
141	2385
142	2312
143	108
144	298
145	397
146	1400
147	313
148	144
149	77
150	925
151	437
152	534
153	262
154	512
155	644
156	171
157	60
158	310
159	279
160	607
161	411
162	92
163	1647
164	1544
165	728
166	230
167	1240
168	2482
169	325
170	334
171	1073
172	772
173	202
174	202
175	602
176	248
177	408
178	947
179	869
180	52
181	206
182	248
183	50
184	79
185	138
186	101
187	32
188	96
189	187
190	122
191	97
192	14
193	394
194	567
195	676
196	495
197	360
198	268
199	376
200	806
201	186
202	106
203	212
204	66
205	908
206	346
207	391
208	70
209	170
210	298
211	828
212	968
213	1029
214	2173
215	87
216	229
217	661
218	44
219	392
220	1321
221	539
222	66
223	243
224	113
225	459
226	300
227	942
228	521
229	750
230	767
231	1088
232	147
233	714
234	174
235	836
236	341
237	582
238	173
239	251
240	214
241	249
242	62
243	944
244	665
245	383
246	517
247	74
248	216
249	643
250	405
251	343
252	263
253	1066
254	35
255	125
256	147
257	382
258	778
259	924
260	332
261	623
262	57
263	89
264	1330
265	1313
266	586
267	286
268	283
269	98
270	74
271	71
272	60
273	199
274	233
275	102
276	665
277	888
278	690
279	312
280	1688
281	414
282	237
283	88
284	387
285	45
286	172
287	236
288	1351
289	196
290	405
291	859
292	1210
293	230
294	717
295	523
296	92
297	356
298	431
299	416
300	48
301	319
302	243
303	35
304	70
305	39
306	1246
307	362
308	919
309	57
310	642
311	74
312	45
313	45
314	586
315	497
316	231
317	234
318	345
319	52
320	180
321	35
322	34
323	91
324	838
325	182
326	68
327	62
328	103
329	162
330	204
331	479
332	68
333	42
334	68
335	38
336	575
337	1172
338	1243
339	336
340	852
341	1201
342	324
343	287
344	698
345	953
346	659
347	48
348	66
349	93
350	80
351	106
352	93
353	369
354	51
355	1084
356	142
357	98
358	97
359	160
360	74
361	1374
362	829
363	240
364	295
365	452
366	2105
367	525
368	445
369	31
370	1048
371	54
372	636
373	481
374	264
375	1345
376	2438
377	286
378	353
379	1609
380	121
381	1606
382	52
383	51
384	89
385	157
386	177
387	1564
388	1057
389	1225
390	840
391	542
392	32
393	1560
394	893
395	1278
396	203
397	1458
398	942
399	895
400	1852
401	210
402	329
403	450
404	1589
405	139
406	142
407	1338
408	496
409	1112
410	62
411	725
412	54
413	55
414	1176
415	851
416	51
417	452
418	404
419	327
420	52
421	1865
422	1159
423	735
424	121
425	155
426	99
427	759
428	84
429	1141
430	60
431	815
432	431
433	210
434	812
435	212
436	285
437	184
438	589
439	886
440	84
441	488
442	231
443	312
444	74
445	1424
446	1083
447	1056
448	1701
449	871
450	374
451	154
452	1412
453	898
454	690
455	428
456	150
457	891
458	1055
459	2081
460	1015
461	1913
462	641
463	157
464	2929
465	368
466	528
467	1930
468	1413
469	208
470	1285
471	1018
472	74
473	714
474	1096
475	1879
476	124
477	645
478	1744
479	868
480	754
481	1289
482	197
483	421
484	522
485	735
486	331
487	1562
488	1633
489	1149
490	828
491	965
492	78
493	1415
494	82
495	962
496	2549
497	311
498	504
499	642
500	123
501	91
502	38
503	103
504	99
505	265
506	770
507	176
508	439
509	125
510	443
511	568
512	1119
513	1218
514	79
515	1996
516	773
517	1508
518	974
519	660
520	144
521	2053
522	121
523	1859
524	1001
525	87
526	1137
527	693
528	1374
529	925
530	1246
531	1909
532	3489
533	2764
534	1376
535	70
536	94
537	1173
538	1306
539	1929
540	1935
541	191
542	662
543	82
544	1415
545	2824
546	766
547	2025
548	2510
549	731
550	1238
551	1463
552	1196
553	1144
554	87
555	490
556	998
557	145
558	1128
559	1338
560	1821
561	3106
562	1044
563	474
564	365
565	1202
566	2060
567	1377
568	1946
569	1630
570	1645
571	166
572	1755
573	1028
574	3377
575	387
576	189
577	801
578	337
579	2166
580	2786
581	2606
582	264
583	1729
584	1837
585	828
586	916
587	2037
588	1473
589	196
590	136
591	1976
592	2322
593	201
594	2588
595	1292
596	657
597	495
598	521
599	93
600	106
601	2752
602	969
603	1218
604	329
605	2039
606	182
607	1460
608	697
609	1041
610	1281
611	1597
612	2843
613	1074
614	1347
615	3309
616	2158
617	675
618	506
619	438
620	2308
621	1357
622	1475
623	1072
624	2584
625	2981
626	132
627	90
628	1041
629	978
630	452
631	1618
632	119
633	150
634	2338
635	1125
636	217
637	1788
638	210
639	205
640	1194
641	1382
642	1348
643	605
644	2295
645	1061
646	1794
647	2332
648	2456
649	1228
650	1918
651	1440
652	1554
653	170
654	848
655	2696
656	3595
657	101
658	326
659	236
660	1842
661	1731
662	2425
663	978
664	2248
665	1776
666	784
667	1881
668	105
669	251
670	438
671	1010
672	1393
673	1847
674	1750
675	622
676	358
677	1489
678	2110
679	894
680	2182
681	603
682	1870
683	1315
684	2027
685	1921
686	933
687	2031
688	1879
689	621
690	242
691	1200
692	189
693	231
694	226
695	701
696	404
697	687
698	1270
699	773
700	1576
701	649
702	622
703	538
704	292
705	422
706	545
707	851
708	1027
709	1017
710	2088
711	426
712	333
713	222
714	780
715	753
716	546
717	431
718	190
719	227
720	239
721	211
722	214
723	332
724	93
725	129
726	204
727	176
728	171
729	235
730	341
731	470
732	944
733	720
734	129
735	1293
736	397
737	1091
738	1014
739	1326
740	1936
741	1264
742	210
743	958
744	1323
745	1770
746	2150
747	122
748	488
749	850
750	142
751	132
752	689
753	384
754	371
755	66
756	840
757	250
758	1719
759	2585
760	1345
761	785
762	707
763	484
764	745
765	1830
766	2671
767	262
768	308
769	526
770	1098
771	1234
772	1810
773	755
774	1902
775	875
776	1252
777	706
778	126
779	1633
780	2984
781	754
782	608
783	282
784	152
785	501
786	554
787	188
788	608
789	412
790	1426
791	126
792	327
793	79
794	43
795	86
796	515
797	322
798	583
799	76
800	1056
801	1777
802	1280
803	1386
804	615
805	1520
806	3003
807	1774
808	1816
809	3713
810	4034
811	2122
812	216
813	257
814	761
815	417
816	986
817	264
818	123
819	1605
820	417
821	515
822	617
823	482
824	204
825	386
826	968
827	90
828	230
829	114
830	127
831	1399
832	1410
833	1729
834	1695
835	484
836	204
837	1831
838	750
839	258
840	391
841	829
842	258
843	297
844	391
845	545
846	752
847	845
848	98
849	297
850	821
851	294
852	527
853	2763
854	1008
855	283
856	990
857	475
858	1312
859	1434
860	367
861	442
862	342
863	321
864	1431
865	2146
866	1462
867	1785
868	829
869	826
870	460
871	1020
872	2331
873	244
874	1614
875	1681
876	1389
877	150
878	251
879	737
880	512
881	125
882	225
883	605
884	1200
885	149
886	475
887	412
888	1591
889	1636
890	472
891	1380
892	1068
893	916
894	448
895	425
896	1255
897	474
898	908
899	556
900	1233
901	1086
902	1763
903	534
904	71
905	126
906	1377
907	637
908	575
909	237
910	243
911	155
912	102
913	299
914	86
915	139
916	1222
917	1406
918	1239
919	833
920	742
921	135
922	402
923	224
924	791
925	621
926	665
927	633
928	346
929	152
930	229
931	499
932	197
933	360
934	339
935	112
936	185
937	349
938	406
939	132
940	50
941	35
942	81
943	455
944	413
945	296
946	1019
947	123
948	1258
949	452
950	33
951	151
952	673
953	58
954	118
955	153
956	329
957	374
958	788
959	73
960	594
961	828
962	267
963	166
964	445
965	33
966	37
967	50
968	124
969	121
970	61
971	1274
972	49
973	26
974	164
975	85
976	273
977	633
978	181
979	61
980	59
981	120
982	240
983	720
984	38
985	374
986	49
987	52
988	251
989	326
990	58
991	59
992	112
993	258
994	715
995	1450
996	424
997	455
998	416
999	281
1000	264
1001	826
1002	369
1003	57
1004	217
1005	250
1006	164
1007	52
1008	1065
1009	524
1010	959
1011	393
1012	958
1013	218
1014	406
1015	651
1016	164
1017	134
1018	409
1019	216
1020	905
1021	139
1022	454
1023	295
1024	409
1025	289
1026	51
1027	135
1028	29
1029	187
1030	71
1031	111
1032	173
1033	68
1034	333
1035	33
1036	104
1037	53
1038	128
1039	228
1040	229
1041	191
1042	350
1043	652
1044	637
1045	1269
1046	1894
1047	957
1048	101
1049	641
1050	713
1051	1270
1052	64
1053	46
1054	998
1055	61
1056	374
1057	70
1058	271
1059	72
1060	100
1061	163
1062	98
1063	739
1064	379
1065	251
1066	1240
1067	587
1068	138
1069	575
1070	284
1071	101
1072	629
1073	992
1074	880
1075	72
1076	637
1077	99
1078	650
1079	101
1080	382
1081	457
1082	309
1083	111
1084	691
1085	191
1086	988
1087	562
1088	553
1089	397
1090	1129
1091	1116
1092	1633
1093	1526
1094	1680
1095	203
1096	878
1097	160
1098	1168
1099	157
1100	1263
1101	844
1102	1319
1103	76
1104	65
1105	949
1106	121
1107	272
1108	990
1109	117
1110	327
1111	140
1112	92
1113	330
1114	131
1115	58
1116	116
1117	377
1118	59
1119	48
1120	67
1121	900
1122	999
1123	792
1124	509
1125	1213
1126	81
1127	267
1128	65
1129	148
1130	959
1131	75
1132	935
1133	248
1134	105
1135	391
1136	887
1137	942
1138	570
1139	589
1140	622
1141	784
1142	378
1143	792
1144	629
1145	1430
1146	822
1147	1414
1148	104
1149	64
1150	1062
1151	265
1152	1701
1153	1137
1154	1005
1155	103
1156	109
1157	50
1158	991
1159	175
1160	1286
1161	909
1162	68
1163	1974
1164	199
1165	113
1166	367
1167	82
1168	605
1169	100
1170	69
1171	38
1172	125
1173	282
1174	1025
1175	1596
1176	98
1177	1581
1178	303
1179	166
1180	1100
1181	186
1182	1205
1183	255
1184	160
1185	162
1186	469
1187	27
1188	99
1189	377
1190	105
1191	949
1192	272
1193	47
1194	79
1195	176
1196	455
1197	795
1198	1014
1199	120
1200	637
1201	804
1202	248
1203	804
1204	261
1205	161
1206	125
1207	726
1208	679
1209	1002
1210	1221
1211	1691
1212	1642
1213	913
1214	138
1215	752
1216	1558
1217	578
1218	168
1219	389
1220	403
1221	981
1222	107
1223	663
1224	646
1225	251
1226	54
1227	97
1228	2232
1229	85
1230	2003
1231	147
1232	590
1233	838
1234	1815
1235	107
1236	1024
1237	1466
1238	56
1239	146
1240	59
1241	447
1242	1218
1243	92
1244	327
1245	701
1246	2157
1247	1148
1248	91
1249	1178
1250	629
1251	207
1252	368
1253	121
1254	1027
1255	1731
1256	1123
1257	93
1258	1552
1259	142
1260	403
1261	1061
1262	498
1263	1304
1264	906
1265	431
1266	358
1267	924
1268	142
1269	168
1270	347
1271	264
1272	125
1273	588
1274	1324
1275	589
1276	251
1277	190
1278	738
1279	1077
1280	76
1281	240
1282	116
1283	486
1284	575
1285	302
1286	66
1287	194
1288	33
1289	188
1290	562
1291	282
1292	25
1293	141
1294	170
1295	44
1296	55
1297	627
1298	37
1299	233
1300	34
1301	492
1302	1299
1303	697
1304	1148
1305	455
1306	136
1307	392
1308	58
1309	94
1310	210
1311	120
1312	43
1313	937
1314	531
1315	154
1316	1557
1317	590
1318	846
1319	1513
1320	46
1321	199
1322	366
1323	89
1324	156
1325	44
1326	48
1327	85
1328	860
1329	88
1330	273
1331	438
1332	867
1333	1210
1334	171
1335	540
1336	1414
1337	149
1338	88
1339	109
1340	60
1341	433
1342	1056
1343	193
1344	286
1345	447
1346	623
1347	109
1348	124
1349	475
1350	76
1351	401
1352	228
1353	285
1354	118
1355	256
1356	146
1357	360
1358	279
1359	137
1360	558
1361	76
1362	183
1363	596
1364	74
1365	283
1366	373
1367	561
1368	299
1369	402
1370	169
1371	60
1372	824
1373	836
1374	427
1375	167
1376	1542
1377	1846
1378	2232
1379	270
1380	53
1381	58
1382	194
1383	118
1384	114
1385	769
1386	100
1387	214
1388	377
1389	254
1390	79
1391	320
1392	1049
1393	952
1394	900
1395	1634
1396	1976
1397	1725
1398	872
1399	195
1400	304
1401	1029
1402	86
1403	38
1404	81
1405	232
1406	149
1407	195
1408	112
1409	414
1410	1863
1411	837
1412	1492
1413	815
1414	186
1415	99
1416	104
1417	1367
1418	507
1419	183
1420	806
1421	532
1422	394
1423	600
1424	234
1425	787
1426	879
1427	675
1428	2030
1429	101
1430	932
1431	1035
1432	148
1433	221
1434	103
1435	122
1436	927
1437	54
1438	1107
1439	903
1440	270
1441	43
1442	52
1443	49
1444	43
1445	1057
1446	172
1447	104
1448	174
1449	111
1450	1297
1451	597
1452	232
1453	559
1454	1055
1455	664
1456	136
1457	144
1458	193
1459	274
1460	52
1461	137
1462	493
1463	151
1464	63
1465	357
1466	693
1467	885
1468	676
1469	210
1470	88
1471	1239
1472	1272
1473	695
1474	120
1475	322
1476	110
1477	235
1478	375
1479	159
1480	240
1481	308
1482	134
1483	636
1484	1709
1485	1410
1486	68
1487	1499
1488	715
1489	101
1490	168
1491	153
1492	166
1493	303
1494	501
1495	882
1496	456
1497	141
1498	222
1499	598
1500	997
1501	156
1502	155
1503	112
1504	127
1505	86
1506	78
1507	720
1508	1349
1509	195
1510	355
1511	1271
1512	87
1513	53
1514	188
1515	294
1516	634
1517	903
1518	330
1519	580
1520	171
1521	368
1522	564
1523	1058
1524	1282
1525	95
1526	1390
1527	1239
1528	83
1529	1908
1530	119
1531	161
1532	457
1533	404
1534	523
1535	1922
1536	1488
1537	2097
1538	1568
1539	508
1540	104
1541	1454
1542	1946
1543	2083
1544	2427
1545	938
1546	1507
1547	140
1548	647
1549	577
1550	1704
1551	238
1552	1095
1553	1705
1554	98
1555	908
1556	69
1557	287
1558	2402
1559	180
1560	312
1561	155
1562	76
1563	319
1564	934
1565	2771
1566	1549
1567	1951
1568	1804
1569	1885
1570	1009
1571	562
1572	951
1573	1517
1574	1368
1575	1898
1576	1115
1577	1461
1578	117
1579	117
1580	87
1581	2293
1582	1333
1583	2366
1584	1693
1585	1516
1586	1523
1587	941
1588	837
1589	118
1590	439
1591	1349
1592	357
1593	595
1594	988
1595	2392
1596	1769
1597	2205
1598	2121
1599	1872
1600	1240
1601	291
1602	1494
1603	2249
1604	1790
1605	1205
1606	1032
1607	2410
1608	287
1609	198
1610	338
1611	134
1612	399
1613	946
1614	51
1615	84
1616	916
1617	1086
1618	1111
1619	1019
1620	350
1621	717
1622	1060
1623	1329
1624	549
1625	292
1626	329
1627	1567
1628	1586
1629	876
1630	2054
1631	64
1632	816
1633	951
1634	1215
1635	521
1636	107
1637	760
1638	3130
1639	1273
1640	807
1641	1303
1642	1608
1643	1790
1644	1160
1645	1398
1646	417
1647	967
1648	1001
1649	835
1650	3285
1651	627
1652	743
1653	296
1654	699
1655	1361
1656	701
1657	877
1658	893
1659	320
1660	182
1661	572
1662	1344
1663	1540
1664	852
1665	1826
1666	615
1667	2871
1668	1370
1669	1013
1670	362
1671	148
1672	1451
1	1849
2	794
3	359
4	1041
5	147
6	122
7	1044
8	700
9	695
10	1220
11	2098
12	252
13	183
14	1994
15	1332
16	2791
17	111
18	269
19	152
20	131
21	777
22	157
23	531
24	1087
25	1483
26	916
27	103
28	2265
29	1128
30	576
31	782
32	72
33	1404
34	1685
35	1163
36	194
37	1308
38	123
39	1466
40	1010
41	384
42	124
43	1374
44	1211
45	407
46	507
47	87
48	106
49	177
50	158
51	444
52	322
53	118
54	156
55	94
56	1375
57	751
58	2172
59	1459
60	1734
61	3278
62	2179
63	1987
64	130
65	474
66	1479
67	1418
68	450
69	1422
70	1023
71	476
72	723
73	138
74	280
75	1050
76	1060
77	1351
78	507
79	1452
80	469
81	70
82	270
83	310
84	226
85	643
86	1543
87	248
88	375
89	774
90	124
91	116
92	1223
93	365
94	1478
95	1267
96	191
97	268
98	1851
99	1177
100	1042
101	1372
102	218
103	1733
104	273
105	120
106	95
107	79
108	64
109	52
110	53
111	158
112	74
113	322
114	316
115	921
116	1386
117	437
118	1153
119	1709
120	58
121	95
122	2032
123	1560
124	1959
125	358
126	103
127	365
128	123
129	991
130	1077
131	808
132	79
1	1366
2	329
3	583
4	268
5	131
6	68
7	390
8	323
9	121
10	92
11	1534
12	763
13	2061
14	1927
15	211
16	1637
17	926
18	2799
19	1319
20	1128
21	1389
22	408
23	189
24	1216
25	1267
26	537
27	356
28	2115
29	595
30	153
31	281
32	1586
33	2399
34	193
35	199
36	1287
37	2370
38	1670
39	166
40	3027
41	907
42	2743
43	318
44	201
45	982
46	2848
47	1540
48	4907
49	4838
50	967
51	369
52	376
53	826
54	639
55	4079
56	2862
57	4887
58	3710
59	458
60	2309
61	1006
62	687
63	679
64	651
65	167
66	221
67	847
68	2150
69	1145
70	1884
71	1792
72	3354
73	4346
74	1360
75	487
76	1287
77	1638
78	960
79	208
80	3556
81	3567
82	648
83	1649
84	783
85	3287
86	3076
87	583
88	649
89	3110
90	2579
91	1853
92	1896
93	1268
94	1540
95	1422
96	2899
97	417
98	206
99	543
100	441
101	4257
102	368
103	619
104	3632
1	3526
2	3993
3	1870
4	3374
5	1590
6	2897
7	3285
8	853
9	2561
10	1816
11	5697
12	3667
13	3207
14	3492
15	2150
16	5434
17	2604
18	7625
19	5608
20	2580
21	2533
22	7126
23	2467
24	2573
25	1515
26	3996
27	3896
28	3092
29	1599
30	2887
31	2035
32	4446
33	2041
34	4622
35	1497
36	6901
37	3405
38	2618
39	2335
40	3325
41	4607
42	2478
43	2701
44	2628
45	2320
46	2889
47	4379
48	4889
49	5132
50	3255
51	3025
52	4021
53	2537
54	3338
55	3681
56	3675
57	2006
58	3593
59	1909
60	2208
61	2702
62	1800
63	4204
64	5034
65	3523
66	4336
67	2514
68	1859
69	2134
70	4826
71	1338
72	1947
73	2145
74	1581
75	3130
76	1917
77	4189
78	2869
79	3334
80	1668
81	4202
82	3516
83	1798
84	2730
85	5028
86	3339
87	1879
[truncated: 459 more rows]

## Sheet: Expt1_060915
mCre-Mib1f/f			Expt 1
30d chase after tmx
Injury & 14d regeneration
Cross Sectional Area of Injured Fibers
	Area
1	124
2	1498
3	2891
4	1327
5	465
6	943
7	1524
8	1971
9	1582
10	1276
11	1811
12	1774
13	2592
14	1323
15	1656
16	1120
17	1739
18	1466
19	1322
20	1609
21	357
22	1963
23	1976
24	1952
25	867
26	1576
27	1607
28	1990
29	1985
30	968
31	76
32	1286
33	901
34	127
35	1134
36	539
37	1292
38	131
39	959
40	941
41	1682
42	1190
43	1357
44	417
45	75
46	899
47	259
48	1235
49	2445
50	1401
51	275
52	1081
53	553
54	1916
55	659
56	346
57	1115
58	650
59	512
60	1811
61	1841
62	1655
63	2252
64	386
65	2045
66	201
67	2014
68	1226
69	109
70	1646
71	2236
72	1442
73	2329
74	232
75	2170
76	848
77	292
78	1207
79	2062
80	2005
81	358
82	1262
83	1283
84	1410
85	1631
86	2111
87	1021
88	711
89	297
90	1275
91	258
92	441
93	738
94	515
95	1929
96	1469
97	313
98	1060
99	1342
100	1622
101	1122
102	2353
103	1318
104	1353
105	1557
106	1767
107	2568
108	209
109	1006
110	200
111	1292
112	1997
113	1279
114	1580
115	241
116	650
117	475
118	334
119	798
120	2345
121	959
122	957
123	927
124	2365
125	1530
126	121
127	825
128	853
129	708
130	441
131	888
132	1552
133	2203
134	992
135	2099
136	841
137	179
138	144
139	1147
140	871
141	278
142	709
143	369
144	750
145	1198
146	1049
147	1335
148	218
149	1112
150	1608
151	457
152	259
153	1127
154	1384
155	731
156	1132
157	1099
158	915
159	301
160	603
161	1829
162	746
163	1007
164	2181
165	1586
166	1063
167	1448
168	820
169	101
170	195
171	136
172	136
173	111
174	1059
175	1351
176	1118
177	943
178	906
179	2187
180	1020
181	1227
182	967
183	636
184	1963
185	602
186	1404
187	1103
188	272
189	1851
190	649
191	567
192	1538
193	808
194	159
195	125
196	134
197	764
198	993
199	1029
200	510
201	1693
202	2317
203	161
204	1058
205	184
206	1180
207	1113
208	478
209	74
210	118
211	151
212	349
213	647
214	118
215	123
216	101
217	193
218	349
219	541
220	1275
221	1120
222	731
223	497
224	1090
225	733
226	865
227	238
228	1527
229	1334
230	1600
231	689
232	1520
233	1657
234	1161
235	1445
236	2287
237	991
238	1321
239	1726
240	1353
241	1249
242	1101
243	809
244	720
245	676
246	1249
247	1687
248	199
249	135
250	1361
251	860
252	1570
253	1628
254	1218
255	1159
256	1857
257	934
258	553
259	1816
260	170
261	2382
262	2382
263	1670
264	1482
265	261
266	438
267	2398
268	1458
269	215
270	106
271	1597
272	2041
273	1878
274	2249
275	76
276	76
277	93
278	950
279	3173
280	2088
281	682
282	983
283	295
284	1580
285	1582
286	1133
287	1202
288	657
289	1084
290	1520
291	1655
292	1009
293	432
294	248
295	79
296	880
297	73
298	856
299	1081
300	1778
301	2334
302	887
303	1104
304	1551
305	723
306	1960
307	930
308	699
309	1250
310	935
311	953
312	747
313	1314
314	1580
315	1110
316	1465
317	728
318	1014
319	667
320	797
321	1104
322	758
323	939
324	1282
325	1412
326	1512
327	980
328	1343
329	2175
330	1191
331	1148
332	251
333	854
334	1305
335	1491
336	1155
337	1060
338	1708
339	1251
340	213
341	274
342	112
343	199
344	146
345	252
346	2232
347	1820
348	1023
349	904
350	2033
351	1409
352	1660
353	1378
354	1484
355	1474
356	1458
357	799
358	1224
359	1332
360	817
361	947
362	2012
363	1027
364	1633
365	2677
366	607
367	1616
368	1304
369	1529
370	98
371	80
372	971
373	1797
374	289
375	563
376	1928
377	2505
378	1411
379	1901
380	924
381	94
382	194
383	1042
384	1793
385	431
386	1557
387	115
388	2441
389	1124
390	1646
391	165
392	254
393	316
394	1617
395	1855
396	1953
397	898
398	2132
399	1805
400	2057
401	1641
402	606
403	1921
404	1184
405	2531
406	57
407	1184
408	2951
409	793
410	1637
411	1936
412	1713
413	134
414	231
415	782
416	1217
417	1634
418	586
419	1282
420	518
421	1562
422	1281
423	630
424	163
425	587
426	772
427	2040
428	796
429	1157
430	796
431	1157
432	1246
433	1514
434	70
435	1341
436	53
437	496
438	1215
439	1919
440	1024
441	2088
442	1822
443	175
444	2562
445	1573
446	140
447	134
448	1398
449	2187
450	2627
451	1979
452	1494
453	740
454	1908
455	2440
456	2362
457	578
458	1156
459	709
460	558
461	59
462	99
463	1211
464	1220
465	183
466	351
467	1199
468	733
469	1218
470	1306
471	190
472	208
473	1214
474	320
475	207
476	273
477	407
478	553
479	1047
480	2347
481	1266
482	2422
483	317
484	145
485	1172
486	586
487	2848
488	2063
489	1350
490	1614
491	1100
492	739
493	1995
494	2194
495	2904
496	290
497	1525
498	728
499	352
500	507
501	919
502	1221
503	908
504	1043
505	1358
506	2629
507	1059
508	1935
509	123
510	2434
511	2101
512	1901
513	1445
514	977
515	139
516	1012
517	812
518	888
519	787
520	932
521	128
522	318
523	476
524	255
525	829
526	732
527	285
528	289
529	1151
530	1023
531	1484
532	600
533	808
534	769
535	986
536	204
537	547
538	1021
539	736
540	273
541	1201
542	1139
543	1001
544	1238
545	1685
546	943
547	707
548	713
549	608
550	1017
551	759
552	891
553	1042
554	635
555	775
556	839
557	141
558	608
559	932
560	218
561	1075
562	604
563	1229
564	1099
565	102
566	1033
567	1422
568	774
569	499
570	245
571	220
572	156
573	205
574	368
575	926
576	534
577	570
578	282
579	672
580	1387
581	677
582	718
583	1083
584	671
585	182
586	996
587	1120
588	848
589	817
590	592
591	774
592	770
593	1037
594	164
595	522
596	744
597	650
598	386
599	1599
600	937
601	749
602	944
603	141
604	120
605	123
606	1538
607	452
608	1098
609	2010
610	736
611	698
612	643
613	1603
614	517
615	995
616	357
617	673
618	943
619	821
620	1113
621	1335
622	606
623	933
624	641
625	442
626	448
627	96
628	76
629	1183
630	691
631	892
632	132
633	856
634	777
635	130
636	585
637	1472
638	1335
639	857
640	725
641	777
642	1573
643	80
644	865
645	579
646	1128
647	534
648	109
649	261
650	638
651	970
652	803
653	1386
654	1455
655	1508
656	1053
657	1334
658	109
659	1875
660	178
661	81
662	122
663	225
664	220
665	777
666	165
667	630
668	216
669	765
670	224
671	406
672	292
673	113
674	584
675	496
676	1254
677	991
678	1382
679	247
680	641
681	349
682	1280
683	1799
684	1616
685	235
686	962
687	733
688	184
689	985
690	1014
691	1894
692	1588
693	1552
694	938
695	830
696	979
697	835
698	1123
699	187
700	536
701	175
702	603
703	1141
704	1204
705	1631
706	731
707	768
708	87
709	78
710	104
711	369
712	142
713	261
714	155
715	76
716	446
717	856
718	618
719	939
720	712
721	1528
722	880
723	1352
724	670
725	159
726	160
727	919
728	406
729	378
730	1070
731	797
732	301
733	1019
734	257
735	94
736	1118
737	1658
738	1877
739	1426
740	561
741	1537
742	1102
743	1273
744	840
745	812
746	104
747	1613
748	978
749	215
750	267
751	699
752	826
753	638
754	206
755	1775
756	1469
757	953
758	1506
759	1107
760	765
761	846
762	757
763	668
764	553
765	398
766	242
767	574
768	1327
769	297
770	625
771	1382
772	1595
773	812
774	1412
775	1322
776	376
777	221
778	222
779	395
780	65
781	395
782	316
783	156
784	210
785	1008
786	309
787	233
788	1064
789	614
790	1075
791	383
792	1627
793	219
794	1024
795	1429
796	933
797	177
798	1185
799	1291
800	127
801	585
802	342
803	850
804	927
805	101
806	449
807	308
808	409
809	406
810	1283
811	534
812	695
813	150
814	516
815	573
816	681
817	392
818	1781
819	1175
820	433
821	703
822	1558
823	417
824	730
825	1195
826	1392
827	610
828	801
829	196
830	1494
831	638
832	518
833	257
834	1133
835	1192
836	234
837	518
838	1020
839	1390
840	907
841	1038
842	1322
843	730
844	968
845	1074
846	829
847	743
848	287
849	168
850	1262
851	1439
852	747
853	1194
854	1304
855	178
856	1137
857	194
858	993
859	1617
860	95
861	781
862	1213
863	1052
864	1834
865	1136
866	1143
867	1388
868	1364
869	1630
870	1158
871	246
872	215
873	124
874	493
875	284
876	102
877	480
878	904
879	1109
880	125
881	194
882	607
883	1122
884	690
885	928
886	515
887	1748
888	1102
889	1150
890	752
891	247
892	2593
893	1203
894	693
895	918
896	1074
897	908
898	110
899	125
900	135
901	1644
902	1161
1	787.54
2	1435.65
3	738.53
4	1857.73
5	1309.33
6	625.722
7	137.312
8	155.903
9	288.145
10	635.018
11	152.1
12	221.812
13	275.47
14	428.838
15	461.37
16	1048.22
17	272.09
18	975.13
19	325.325
20	80.275
21	1534.52
22	302.088
23	525.168
24	235.755
25	62.953
26	277.16
27	89.148
28	2983.27
29	122.103
30	458.413
31	108.16
32	2306.85
33	1026.25
34	298.708
35	1191.45
36	809.51
37	1514.24
38	703.885
39	608.4
40	472.355
41	496.86
42	708.11
43	70.98
44	478.693
45	668.818
46	1216.38
47	283.92
48	434.33
49	1014.85
50	133.088
51	640.933
52	619.808
53	116.188
54	542.49
55	159.282
56	568.263
57	686.985
58	1610.57
59	1380.31
60	186.745
61	1178.35
62	605.02
63	2128.98
64	466.863
65	873.73
66	745.712
67	723.32
68	844.578
69	546.715
70	124.215
71	1028.37
72	926.965
73	1253.98
74	620.653
75	900.348
76	547.56
77	261.528
78	749.938
79	880.49
80	1011.47
81	259.838
82	2356.7
83	258.57
84	969.638
85	360.815
86	1287.36
87	181.675
88	1791.82
89	248.853
90	931.19
91	338.423
92	102.245
93	237.023
94	455.033
95	287.3
96	569.952
97	124.638
98	249.698
99	1116.67
100	478.27
101	79.853
102	212.095
103	136.045
104	99.288
105	586.008
106	801.905
107	182.098
108	1352
109	1257.78
110	803.595
111	381.94
112	69.29
113	370.533
114	760.078
115	904.995
116	120.413
117	37.602
118	925.698
119	1143.71
120	87.035
121	945.133
122	302.088
123	384.475
124	648.538
125	106.893
126	441.09
127	70.98
128	686.14
129	144.073
130	278.85
131	214.63
132	934.57
133	140.27
134	490.1
135	247.162
136	208.292
137	142.383
138	365.463
139	105.625
140	862.323
141	649.383
142	1061.74
143	1135.26
144	382.363
145	194.773
146	1760.56
147	170.69
148	336.31
149	680.648
150	694.168
151	129.285
152	1079.07
153	205.758
154	257.725
155	107.737
156	628.258
157	227.305
158	1147.09
159	502.353
160	773.598
161	92.528
162	119.145
163	905.84
164	120.413
165	134.355
166	606.288
167	192.66
168	257.725
169	185.478
170	148.298
171	291.525
172	596.993
173	610.513
174	838.663
175	1118.36
176	84.923
177	317.298
178	267.02
179	690.788
180	1083.29
181	91.26
182	99.71
183	97.598
184	146.608
185	658.255
186	689.098
187	537.843
188	160.127
189	517.562
190	258.148
191	1003.86
192	381.518
193	789.23
194	257.725
195	768.528
196	318.565
197	793.455
198	205.335
199	493.058
200	1534.94
201	183.365
202	162.24
203	66.332
204	122.103
205	1060.47
206	155.48
207	250.12
208	836.128
209	891.898
210	1869.14
211	75.205
212	138.157
213	144.073
214	142.383
215	65.487
216	861.478
217	607.555
218	1210.88
219	1295.38
220	803.595
221	1604.65
222	387.855
223	488.41
224	1861.54
225	2211.36
226	318.142
227	403.91
228	622.343
229	2545.14
230	133.933
231	946.4
232	1823.51
233	1528.18
234	1302.14
235	226.883
236	1637.61
237	1551.84
238	567.418
239	444.048
240	693.323
241	1720
242	1501.99
243	244.628
244	1273.84
245	1760.13
246	409.403
247	3046.65
248	1812.53
249	1212.58
250	1627.47
251	158.015
252	645.158
253	468.553
254	1772.39
255	1460.16
256	2278.97
257	410.67
258	164.775
259	597.837
260	1088.36
261	988.228
262	145.34
263	1409.04
264	717.828
265	1441.57
266	316.875
267	182.098
268	599.105
269	1441.15
270	2114.19
271	112.385
272	1237.92
273	749.515
274	165.198
275	122.525
276	137.312
277	377.715
278	296.595
279	1147.09
280	925.698
281	1106.11
282	1736.47
283	1246.8
284	58.728
285	124.638
286	612.625
287	1226.94
288	223.503
289	87.035
290	340.958
291	261.528
292	74.36
293	302.933
294	621.075
295	795.568
296	570.798
297	141.537
298	146.608
299	232.375
300	187.59
301	643.468
302	111.963
303	610.09
304	169.845
305	872.04
306	1093.01
307	489.678
308	458.835
309	258.993
310	313.495
311	1156.81
312	807.82
313	489.678
314	495.17
315	326.593
316	441.09
317	1061.74
318	277.583
319	693.745
320	417.43
321	261.528
322	178.295
323	1498.18
324	1273.84
325	659.945
326	611.358
327	108.16
328	140.693
329	687.83
330	229.417
331	231.953
332	442.78
333	2191.93
334	1653.24
335	1315.24
336	2185.59
337	1682.39
338	568.263
339	891.053
340	151.678
341	780.78
342	635.44
343	145.34
344	819.65
345	911.332
346	103.513
347	412.36
348	658.678
349	1349.04
350	1322.42
351	937.528
352	1915.62
353	1168.21
354	189.28
355	1067.23
356	623.61
357	517.562
358	685.295
359	1818.86
360	507
361	1129.34
362	517.14
363	1262.43
364	38.87
365	778.245
366	527.702
367	406.022
368	135.2
369	1454.24
370	1183.42
371	125.06
372	789.653
373	793.878
374	1724.64
375	1717.46
376	637.553
377	74.782
378	1675.63
379	1634.23
380	636.285
381	636.285
382	85.345
383	726.7
384	528.548
385	610.935
386	684.45
387	532.773
388	583.472
389	677.69
390	1161.03
391	155.48
392	1084.98
393	238.29
394	197.73
395	182.098
396	155.058
397	136.89
398	889.363
399	1515.51
400	702.618
401	85.345
402	267.02
403	910.91
404	291.948
405	640.51
406	326.593
407	683.183
408	839.085
409	825.988
410	128.018
411	1613.11
412	659.1
413	1395.94
414	99.71
415	542.913
416	1024.98
417	657.41
418	1401.01
419	1747.46
420	1546.77
421	2003.49
422	1511.7
423	855.562
424	141.96
425	504.888
426	1047.38
427	962.033
428	761.768
429	1775.77
430	1067.23
431	807.398
432	854.718
433	1444.11
434	1938.01
435	1507.48
436	703.885
437	825.988
438	431.373
439	280.54
440	76.05
441	63.798
442	434.753
443	1331.72
444	567.84
445	960.343
446	1769.43
447	605.442
448	1474.1
449	623.61
450	297.017
451	716.982
452	266.175
453	764.725
454	120.835
455	51.545
456	962.455
457	1262.43
458	1179.2
459	1181.31
460	1035.97
461	986.96
462	1256.09
463	850.493
464	780.78
465	1440.3
466	302.933
467	1017.38
468	426.303
469	164.775
470	1139.06
471	579.67
472	394.615
473	230.685
474	701.35
475	346.028
476	770.218
477	826.41
478	684.028
479	56.615
480	1027.94
481	1052.03
482	1227.36
483	1371.43
484	515.45
485	83.233
486	837.818
487	1447.06
488	1771.12
489	196.885
490	509.958
491	937.105
492	79.853
493	541.645
494	829.368
495	376.447
496	985.27
497	536.998
498	705.575
499	123.793
500	133.933
501	624.455
502	339.268
503	933.303
504	644.735
505	739.798
506	857.675
507	2092.64
508	918.093
509	1903.36
510	146.608
511	684.873
512	400.953
513	647.692
514	864.013
515	1136.1
516	218.01
517	1403.12
518	1253.98
519	1705.63
520	2311.07
521	1906.74
522	496.86
523	155.48
524	186.745
525	1095.12
526	197.308
527	1836.61
528	1484.24
529	2080.39
530	2949.89
531	490.945
532	334.197
533	1911.81
534	576.29
535	679.38
536	1242.15
537	168.578
538	232.375
539	316.875
540	256.035
541	171.958
542	154.213
543	883.448
544	109.005
545	327.438
546	196.04
547	639.665
548	103.513
549	622.343
550	633.327
551	1783.8
552	323.635
553	511.225
554	258.993
555	237.445
556	862.745
557	849.225
558	1016.53
559	106.893
560	472.778
561	1389.18
562	918.515
563	924.853
564	104.358
565	179.562
566	427.57
567	856.408
568	62.108
569	936.26
570	904.15
571	305.468
572	159.705
573	102.245
574	509.113
575	444.47
576	185.9
577	304.2
578	114.075
579	242.515
580	162.662
581	707.688
582	1035.55
583	203.223
584	291.525
585	94.218
586	434.753
587	388.278
588	907.53
589	916.825
590	151.255
591	319.833
592	888.518
593	1115.82
594	847.113
595	273.358
596	230.263
597	1564.1
598	929.078
599	1000.9
600	1498.61
601	1524.38
602	345.605
603	664.17
604	1135.68
605	1697.18
606	1115.4
607	2377.83
608	2785.54
609	2327.13
610	1823.93
1	1196.1
2	556.01
3	872.463
4	577.98
5	673.043
6	852.183
7	566.15
8	1514.24
9	734.306
10	1127.65
11	1263.28
12	712.758
13	970.906
14	1004.71
15	1398.05
16	719.096
17	1027.1
18	596.993
19	1149.2
20	834.438
21	1227.79
22	715.716
23	1002.59
24	976.821
25	789.653
26	645.58
27	1018.23
28	440.245
29	1349.47
30	837.396
31	1612.26
32	952.738
33	1132.72
34	642.2
35	653.185
36	1177.09
37	1947.73
38	866.548
39	476.58
40	864.436
41	533.195
42	565.305
43	847.536
44	1047.38
45	982.313
46	791.343
47	1156.81
48	1207.93
49	986.538
50	1196.94
51	625.3
52	692.9
53	503.62
54	1241.73
55	858.098
56	782.048
57	1313.55
58	956.541
59	621.498
60	1101.88
61	513.76
62	518.408
63	959.498
64	502.775
65	834.016
66	878.378
67	860.211
68	1563.25
69	769.373
70	586.853
71	672.62
72	568.263
73	1049.91
74	902.883
75	759.233
76	755.431
77	1004.71
78	736.841
79	972.173
80	907.953
81	719.941
82	781.203
83	1003.02
84	785.428
85	872.886
86	529.393
87	714.871
88	638.82
89	695.858
90	1570.43
91	572.91
92	848.803
93	800.638
94	946.823
95	525.59
96	1171.59
97	906.263
98	1456.78
99	1587.76
100	984.426
101	1568.32
102	812.468
103	584.74
104	896.546
105	972.596
106	593.613
107	1324.54
108	816.693
109	1166.1
110	594.035
111	745.291
112	1187.65
113	830.636
114	1018.65
115	609.668
116	1889.42
117	622.343
118	1015.69
119	637.975
120	1081.18
121	908.798
122	748.671
123	830.636
124	520.098
125	635.44
126	660.79
127	1565.36
128	615.583
129	435.175
130	448.273
131	863.168
132	614.315
133	744.023
134	724.588
135	802.751
136	1244.69
137	735.151
138	810.778
139	485.875
140	709.378
141	1551.42
142	620.653
143	928.656
144	1025.41
145	872.041
146	395.038
147	490.523
148	790.498
149	634.173
150	801.061
151	488.833
152	871.196
153	1995.89
154	847.536
155	730.926
156	1898.72
157	437.71
158	707.688
159	1469.03
160	454.61
161	744.446
162	885.138
163	759.656
164	499.818
165	870.351
166	851.761
167	599.95
168	790.498
169	907.531
170	636.285
171	705.575
172	912.178
173	446.16
174	967.103
175	753.741
176	390.813
177	575.445
178	659.523
179	472.355
180	728.391
181	749.938
182	547.56
183	940.908
184	1316.93
185	630.793
186	1070.62
187	942.176
188	924.853
189	504.043
190	622.765
191	728.813
192	666.705
193	1237.08
194	746.558
195	683.183
196	967.103
197	666.705
198	1033.01
199	754.163
200	881.758
201	1301.3
202	876.688
203	1171.17
204	424.613
205	716.138
206	591.5
207	1113.71
208	1488.47
209	1157.65
210	652.34
211	1032.17
212	672.198
213	441.935
214	1035.97
215	1179.62
216	905.841
217	1117.94
218	671.775
219	836.973
220	787.541
221	919.783
222	719.096
223	573.333
224	922.318
225	869.928
226	1486.78
227	847.536
228	694.168
229	1106.53
230	987.806
231	849.648
232	546.293
233	1233.28
234	875.421
235	1215.96
236	1102.3
237	763.458
238	654.875
239	1012.73
240	951.893
241	1168.21
242	1069.77
243	734.306
244	794.301
245	1035.55
246	599.95
247	1109.06
248	601.64
249	1300.03
250	834.438
251	855.141
252	1440.3
253	1481.29
254	1469.46
255	806.976
256	1000.9
257	1637.61
258	660.79
259	586.853
260	1229.05
261	563.615
262	852.606
263	1276.37
264	697.125
265	846.268
266	700.083
267	1014.42
268	439.823
269	856.831
270	533.195
271	1208.35
272	1082.02
273	1371.44
274	843.311
275	586.853
276	1361.72
277	897.391
278	791.766
279	760.501
280	1112.44
281	621.075
282	1130.19
283	531.505
284	836.973
285	487.565
286	808.243
287	605.865
288	612.203
289	1364.68
290	571.643
291	575.868
292	890.208
293	690.788
294	317.298
295	108.16
296	582.628
297	931.191
298	90.838
299	136.468
300	136.89
301	249.698
302	216.32
303	489.255
304	231.953
305	489.255
306	356.59
307	406.445
308	44.785
309	346.45
310	326.17
311	255.613
312	310.538
313	641.778
314	1364.68
315	720.363
316	256.458
317	366.73
318	616.85
319	904.996
320	118.3
321	755.008
322	498.973
323	195.618
324	46.475
325	20.703
326	57.46
327	95.908
328	95.485
329	45.208
330	895.701
331	373.913
332	413.628
333	423.768
334	840.353
335	333.775
336	553.053
337	365.04
338	561.503
339	359.125
340	1510.02
341	879.646
342	416.585
343	723.743
344	1167.79
345	458.413
346	812.046
347	321.523
348	765.571
349	413.205
350	989.073
351	474.468
352	1071.04
353	812.891
354	689.943
355	400.53
356	493.058
357	182.943
358	591.923
359	64.22
360	249.698
361	613.893
362	251.81
363	633.328
364	857.253
365	350.253
366	663.748
367	525.168
368	568.263
369	957.386
370	515.873
371	52.39
372	495.17
373	248.43
374	315.185
375	380.25
376	666.705
377	316.453
378	129.285
379	1059.63
380	498.128
381	366.73
382	863.591
383	307.158
384	838.663
385	54.925
386	73.938
387	96.33
388	50.7
389	45.208
390	13.52
391	385.743
392	1162.3
393	507.845
394	1354.96
395	950.626
396	1409.46
397	611.358
398	460.103
399	787.963
400	535.308
401	676
402	184.633
403	639.243
404	225.615
405	513.76
406	218.433
407	419.12
408	761.346
409	191.393
410	574.6
411	772.331
412	103.513
413	28.308
414	36.335
415	46.898
416	13.943
417	187.59
418	141.115
419	99.71
420	620.653
421	1338.06
422	111.963
423	52.813
424	40.983
425	276.738
426	451.23
427	354.055
428	318.565
429	606.71
430	230.263
431	625.3
432	569.953
433	337.578
434	357.013
435	288.568
436	428.415
437	134.778
438	60.418
439	155.058
440	494.748
441	44.363
442	109.428
443	485.875
444	413.628
445	32.11
446	19.858
447	83.655
448	43.94
449	84.5
450	391.658
451	48.588
452	32.11
453	37.603
454	649.805
455	375.18
456	1009.78
457	113.23
458	81.12
459	183.788
460	942.598
461	897.391
462	609.245
463	389.968
464	509.113
465	436.443
466	429.26
467	32.533
468	95.908
469	82.81
470	16.9
471	18.168
472	1860.69
473	505.31
474	669.663
475	686.985
476	1139.06
477	777.823
478	823.876
479	678.113
480	132.243
481	626.145
482	453.343
483	565.728
[truncated: 1,970 more rows]

## Sheet: Expt5_060915
mCre-Mib1f/f			Expt 5
30d chase after tmx
Injury & 14d regeneration
Cross Sectional Area of Injured Fibers
	Area
1	245
2	621
3	789
4	98
5	195
6	559
7	141
8	448
9	1592
10	1836
11	241
12	154
13	146
14	2472
15	284
16	72
17	41
18	1257
19	1914
20	1418
21	1266
22	1319
23	1381
24	67
25	71
26	1862
27	128
28	137
29	1326
30	1573
31	74
32	1354
33	1482
34	1003
35	88
36	103
37	546
38	570
39	67
40	1093
41	221
42	242
43	1014
44	88
45	832
46	108
47	129
48	106
49	1053
50	2880
51	996
52	1349
53	1470
54	1974
55	1970
56	134
57	99
58	428
59	1436
60	222
61	306
62	673
63	1734
64	1088
65	1456
66	1554
67	1055
68	1696
69	1104
70	1048
71	1555
72	728
73	623
74	63
75	64
76	1655
77	266
78	676
79	1205
80	1649
81	1940
82	2295
83	896
84	447
85	665
86	310
87	422
88	432
89	98
90	673
91	267
92	982
93	2314
94	676
95	1798
96	2667
97	95
98	610
99	1050
100	983
101	1068
102	128
103	763
104	1087
105	662
106	656
107	306
108	524
109	380
110	535
111	353
112	692
113	441
114	609
115	324
116	550
117	2680
118	1012
119	118
120	110
121	227
122	92
123	41
124	92
125	1793
126	1532
127	1055
128	1478
129	1119
130	527
131	2238
132	69
133	1902
134	1279
135	106
136	77
137	62
138	141
139	1057
140	696
141	314
142	387
143	1649
144	2459
145	1010
146	1269
147	3250
148	2160
149	2857
150	1031
151	738
152	277
153	1583
154	114
155	768
156	156
157	232
158	266
159	456
160	298
161	2579
162	158
163	126
164	190
165	533
166	1771
167	1620
168	158
169	1084
170	63
171	108
172	1043
173	2270
174	810
175	1013
176	1186
177	105
178	900
179	630
180	471
181	95
182	460
183	595
184	250
185	232
186	1889
187	818
188	94
189	392
190	1306
191	125
192	446
193	553
194	177
195	82
196	2354
197	633
198	2103
199	1314
200	1173
201	1174
202	1927
203	873
204	804
205	1997
206	28
207	1527
208	339
209	106
210	51
211	1002
212	848
213	123
214	76
215	306
216	101
217	53
218	42
219	164
220	275
221	83
222	76
223	42
224	311
225	281
226	287
227	329
228	355
229	73
230	384
231	566
232	465
233	56
234	61
235	146
236	1254
237	150
238	68
239	1490
240	82
241	37
242	123
243	112
244	213
245	482
246	117
247	37
248	2074
249	1672
250	237
251	347
252	1654
253	848
254	1060
255	1647
256	1332
257	92
258	1980
259	913
260	875
261	1665
262	1123
263	463
264	444
265	1344
266	1890
267	1316
268	117
269	80
270	466
271	986
272	42
273	381
274	296
275	1019
276	700
277	1960
278	46
279	229
280	1006
281	431
282	1466
283	959
284	2041
285	576
286	1344
287	994
288	2336
289	1753
290	2224
291	3164
292	1609
293	1700
294	1191
295	174
296	1404
297	1118
298	90
299	2491
300	344
301	866
302	123
303	83
304	96
305	268
306	246
307	82
308	99
309	2032
310	1722
311	809
312	344
313	306
314	1236
315	101
316	438
317	734
318	202
319	71
320	1671
321	1048
322	195
323	211
324	170
325	82
326	295
327	361
328	190
329	43
330	878
331	113
332	143
333	558
334	818
335	491
336	200
337	1317
338	136
339	109
340	58
341	78
342	109
343	74
344	570
345	567
346	571
347	1428
348	641
349	232
350	135
351	55
352	84
353	1210
354	1430
355	491
356	733
357	1605
358	307
359	114
360	387
361	1149
362	53
363	338
364	715
365	235
366	1414
367	714
368	683
369	705
370	233
371	106
372	119
373	1828
374	97
375	908
376	2268
377	415
378	49
379	1759
380	1441
381	1427
382	348
383	399
384	190
385	1866
386	1284
387	99
388	1231
389	1115
390	329
391	241
392	150
393	592
394	1454
395	140
396	542
397	298
398	483
399	481
400	79
401	169
402	483
403	194
404	608
405	1333
406	68
407	1261
408	575
409	2616
410	2420
411	177
412	1501
413	55
414	1654
415	148
416	1453
417	126
418	147
419	641
420	1472
421	574
422	46
423	322
424	88
425	123
426	367
427	458
428	910
429	146
430	148
431	1239
432	1254
433	136
434	350
435	186
436	199
437	89
438	1644
439	1950
440	75
441	1349
442	1804
443	1323
444	1510
445	441
446	1119
447	1651
448	2066
449	1820
450	140
451	539
452	848
453	149
454	1556
455	1049
456	1810
457	1593
458	495
459	363
460	67
461	921
462	788
463	1681
464	1532
465	2711
466	2147
467	2356
468	1635
469	1613
470	1055
471	101
472	91
473	148
474	136
475	213
476	117
477	145
478	290
479	2306
480	1483
481	2794
482	2706
483	694
484	3254
485	74
486	1150
487	2338
488	1537
489	1290
490	169
491	2298
492	2364
493	370
494	220
495	3012
496	916
497	2380
498	1214
499	438
500	232
501	1491
502	3558
503	2528
504	1591
505	2902
506	102
507	163
508	565
509	62
510	572
511	504
512	552
513	60
514	289
515	273
516	210
517	1748
518	4571
519	846
520	543
521	638
522	409
523	88
524	93
525	2929
526	2253
527	467
528	988
529	953
530	1138
531	138
532	1247
533	134
534	2284
535	238
536	1374
537	1230
538	2997
539	147
540	855
541	2855
542	2918
543	1118
544	125
545	233
546	900
547	670
548	2206
549	581
550	623
551	1011
552	937
553	1050
554	160
555	1809
556	330
557	1482
558	972
559	213
560	204
561	120
562	143
563	2438
564	105
565	197
566	1166
567	1114
568	1383
569	73
570	91
571	119
572	575
573	734
574	1695
575	792
576	247
577	132
578	83
579	2140
580	700
581	1369
582	1673
583	1616
584	44
585	81
586	346
587	681
588	132
589	55
590	47
591	240
592	210
593	369
594	590
595	1900
596	289
597	973
598	71
599	40
600	253
601	1085
602	117
603	207
604	162
605	608
606	289
607	1643
608	2407
609	1602
610	2406
611	243
612	845
613	2342
614	737
615	150
616	176
617	1000
618	148
619	169
620	202
621	195
622	684
623	1539
624	1284
625	1322
626	159
627	1453
628	2849
629	1792
630	284
631	1700
632	527
633	1498
634	487
635	2083
636	443
637	1017
638	559
639	716
640	84
641	35
642	183
643	225
644	777
645	452
646	174
647	339
648	951
649	1526
650	1897
651	747
652	101
653	2175
654	226
655	36
656	108
657	969
658	1625
659	1758
660	749
661	599
662	206
663	381
664	644
665	72
666	157
667	149
668	47
669	81
670	894
671	92
672	35
673	916
674	1678
675	810
676	1330
677	169
678	92
679	1272
680	267
681	172
682	74
683	90
684	120
685	133
686	1850
687	77
688	137
689	955
690	2654
691	1242
692	518
693	417
694	782
695	134
696	117
697	441
698	305
699	462
700	225
701	476
702	87
703	238
704	550
705	176
706	343
707	370
708	326
709	835
710	711
711	161
712	528
713	204
714	187
715	216
716	2047
717	98
718	589
719	142
720	171
721	1000
722	606
723	144
724	382
725	526
726	1207
727	2783
728	640
729	336
730	137
731	134
732	269
733	128
734	102
735	123
736	470
737	139
738	229
739	231
740	101
741	234
742	142
743	870
744	316
745	135
746	125
747	314
748	453
749	296
750	184
751	183
752	838
753	834
754	404
755	822
756	821
757	116
758	229
759	87
760	1261
761	729
762	165
763	237
764	487
765	219
766	569
767	125
768	529
769	133
770	323
771	553
772	714
773	1401
774	397
775	667
776	905
777	718
778	1227
779	325
780	708
781	169
782	70
783	59
784	195
785	390
786	1225
787	1357
788	130
789	663
790	207
791	158
792	315
793	1857
794	921
795	202
796	1362
797	1698
798	2273
799	519
800	369
801	774
802	531
803	125
804	283
805	722
806	1930
807	1502
808	2191
809	976
810	293
811	343
812	142
813	147
814	627
815	256
816	1313
817	949
818	144
819	932
820	540
821	67
822	184
823	61
824	1325
825	779
826	885
827	854
828	698
829	2068
830	1435
831	49
832	2370
833	469
834	591
835	913
836	302
837	1070
838	625
839	808
840	102
841	213
842	357
843	1949
844	1705
845	49
846	439
847	105
848	1012
849	1265
850	1543
851	1139
852	586
853	742
854	442
855	415
856	1748
857	1000
858	832
859	113
860	150
861	1371
862	509
863	21
864	566
865	1427
866	2143
867	1590
868	565
869	263
870	1652
871	52
872	167
873	143
874	820
875	604
876	638
877	15
878	46
879	566
880	243
881	199
882	155
883	60
884	57
885	210
886	111
887	95
888	184
889	302
890	61
891	104
892	72
893	824
894	1551
895	1437
896	1913
897	134
898	188
899	1616
900	719
901	83
902	1011
903	52
904	185
905	291
906	1135
907	716
908	390
909	1428
910	1290
911	685
912	127
913	1213
914	1227
915	203
916	375
917	38
918	93
919	25
920	39
921	35
922	145
923	45
924	63
925	55
926	87
927	161
928	24
929	338
930	34
931	162
932	549
933	721
934	146
935	491
936	88
937	1200
938	107
939	119
940	426
941	94
942	86
943	107
944	93
945	131
946	50
947	72
948	99
949	303
950	94
951	133
952	143
953	1462
954	286
955	800
956	131
957	305
958	1666
959	510
960	19
961	41
962	64
963	135
964	80
965	41
966	241
967	62
968	320
969	76
970	1154
971	130
972	76
973	75
974	199
975	360
976	131
977	63
978	883
979	457
980	630
981	393
982	35
983	123
984	287
985	922
986	283
987	49
988	98
989	96
990	38
991	1316
992	41
993	935
994	223
995	153
996	234
997	180
998	846
999	601
1000	63
1001	191
1002	69
1003	249
1004	402
1005	284
1006	522
1007	1747
1008	987
1009	638
1010	1172
1011	1500
1012	1524
1013	1065
1014	2494
1015	51
1016	92
1017	1005
1018	112
1019	82
1020	1527
1021	539
1022	1785
1023	3205
1024	1567
1025	442
1026	71
1027	766
1028	2506
1029	225
1030	305
1031	896
1032	1308
1033	530
1034	259
1035	62
1036	96
1037	63
1038	1037
1039	1474
1040	1457
1041	183
1042	216
1043	215
1044	164
1045	994
1046	560
1047	145
1048	2597
1049	1122
1050	79
1051	891
1052	153
1053	323
1054	578
1055	469
1056	403
1057	92
1058	1008
1059	1006
1060	48
1061	141
1062	305
1063	363
1064	129
1065	119
1066	34
1067	637
1068	267
1069	23
1070	690
1071	391
1072	851
1073	143
1074	324
1075	70
1076	136
1077	105
1078	131
1079	114
1080	1141
1081	57
1082	65
1083	779
1084	918
1085	80
1086	521
1087	72
1088	454
1089	1300
1090	70
1091	202
1092	25
1093	197
1094	40
1095	75
1096	52
1097	37
1098	202
1099	261
1100	558
1101	513
1102	74
1103	603
1104	48
1105	37
1106	55
1107	44
1108	722
1109	22
1110	57
1111	117
1112	180
1113	32
1114	2167
1115	32
1116	11
1117	76
1118	144
1119	507
1120	181
1121	940
1122	658
1123	196
1124	847
1125	1054
1126	245
1127	188
1128	47
1129	36
1130	124
1131	22
1132	22
1133	160
1134	27
1135	172
1136	371
1137	60
1138	417
1139	64
1140	150
1141	968
1142	27
1143	47
1144	520
1145	253
1146	1262
1147	147
1148	359
1149	1436
1150	65
1151	892
1152	303
1153	23
1154	65
1155	585
1156	25
1157	38
1158	370
1159	29
1160	385
1161	337
1162	96
1163	654
1164	45
1165	79
1166	56
1167	375
1168	600
1169	210
1170	687
1171	278
1172	123
1173	429
1174	90
1175	1019
1176	310
1177	410
1178	76
1179	56
1180	41
1181	131
1182	49
1183	1989
1184	917
1185	472
1186	120
1187	75
1188	52
1189	155
1190	86
1191	309
1192	1582
1193	73
1194	52
1195	99
1196	203
1197	58
1198	379
1199	64
1200	38
1201	39
1202	1148
1203	71
1204	1250
1205	494
1206	223
1207	327
1208	181
1209	928
1210	917
1211	28
1212	36
1213	957
1214	40
1215	107
1216	66
1217	199
1218	174
1219	75
1220	95
1221	82
1222	149
1223	199
1224	41
1225	50
1226	692
1227	129
1228	64
1229	657
1230	47
1231	91
1232	40
1233	895
1234	1706
1235	701
1236	1033
1237	820
1238	1122
1239	79
1240	874
1241	51
1242	62
1243	42
1244	76
1245	297
1246	68
1247	265
1248	208
1249	224
1250	96
1251	51
1252	41
1253	43
1254	229
1255	60
1256	54
1257	1672
1258	40
1259	34
1260	608
1261	111
1262	228
1263	610
1264	76
1265	1384
1266	736
1267	75
1268	1300
1269	93
1270	839
1271	1220
1272	70
1273	80
1274	275
1275	88
1276	79
1277	502
1278	400
1279	83
1280	57
1281	544
1282	51
1283	43
1284	40
1285	37
1286	112
1287	290
1288	93
1289	60
1290	242
1291	131
1292	53
1293	728
1294	55
1295	1843
1296	196
1297	83
1298	1174
1299	1510
1300	299
1301	241
1302	136
1303	37
1304	407
1305	44
1306	43
1307	154
1308	245
1309	82
1310	44
1311	82
1312	919
1313	1059
1314	33
1315	1161
1316	143
1317	1054
1318	509
1319	480
1320	166
1321	46
1322	32
1323	77
1324	94
1325	406
1326	297
1327	91
1328	55
1329	408
1330	166
1331	325
1332	624
1333	593
1334	923
1335	344
1336	174
1337	71
1338	68
1339	644
1340	1139
1341	93
1342	531
1343	695
1344	608
1345	867
1346	39
1347	21
1348	32
1349	809
1350	49
1351	33
1352	195
1353	131
1354	244
1355	144
1356	31
1357	158
1358	115
1359	13
1360	22
1361	691
1362	679
1363	324
1364	37
1365	40
1366	49
1367	77
1368	128
1369	88
1370	1257
1371	82
1372	203
1373	59
1374	38
1375	39
1376	114
1377	179
1378	1111
1379	267
1380	1167
1381	1377
1382	303
1383	2532
1384	2215
1385	268
1386	987
1387	306
1388	1073
1	381
2	218
3	25
4	5
5	26
6	65
7	272
8	262
9	427
10	354
11	36
12	33
13	33
14	55
15	32
16	241
17	82
18	470
19	175
20	102
21	351
22	134
23	21
24	114
25	347
26	37
27	222
28	510
29	346
30	37
31	134
32	37
33	59
34	344
35	38
36	203
37	250
38	122
39	187
40	223
41	37
42	230
43	417
44	303
45	201
46	202
47	118
48	31
49	32
50	143
51	140
52	623
53	1281
54	49
55	65
56	155
57	71
58	59
59	611
60	184
61	480
62	283
63	91
64	380
65	84
66	129
67	47
68	23
69	64
70	1062
71	42
72	104
73	60
74	27
75	184
76	19
77	62
78	30
79	210
80	98
81	197
82	154
83	17
84	166
85	30
86	101
87	504
88	149
89	64
90	542
91	33
92	462
93	894
94	123
95	1459
96	35
97	367
98	174
99	165
100	191
101	72
102	127
103	112
104	120
105	521
106	106
107	29
108	279
109	759
110	55
111	322
112	420
113	442
114	8
115	513
116	22
117	22
118	84
119	14
120	245
121	226
122	865
123	514
124	512
125	62
126	368
127	448
128	115
129	480
130	42
131	62
132	85
133	1129
134	14
135	11
136	27
137	49
138	589
139	54
140	135
141	49
142	571
143	270
144	28
145	600
146	744
147	1451
148	18
149	32
150	28
151	35
152	756
153	640
154	42
155	502
156	117
157	80
158	934
159	755
160	43
161	32
162	85
163	923
164	324
165	248
166	186
167	338
168	96
169	111
170	151
171	214
172	28
173	367
174	26
175	954
176	110
177	29
178	203
179	137
180	861
181	315
182	88
183	379
184	334
185	103
186	79
187	130
188	76
189	123
190	48
191	68
192	636
193	214
194	36
195	52
196	548
197	364
198	109
199	203
200	442
201	49
202	68
203	88
204	125
205	225
206	66
207	184
208	50
209	44
210	493
211	155
212	621
213	145
214	30
215	149
216	499
217	316
218	239
219	114
220	76
221	65
222	177
223	219
224	268
225	698
226	283
227	588
228	455
229	114
230	16
231	235
232	69
233	123
234	62
235	41
236	25
237	41
238	50
239	1128
240	591
241	60
242	71
243	95
244	80
245	280
246	297
247	98
248	258
249	141
250	51
251	41
252	650
253	807
254	294
255	955
256	754
257	164
258	168
259	387
260	311
261	45
262	343
263	35
264	108
265	56
266	52
267	644
268	123
269	248
270	114
271	888
272	99
273	322
274	536
275	121
276	869
277	304
278	120
279	97
280	322
281	395
282	251
283	1018
284	182
285	114
286	50
287	225
288	263
289	209
290	264
291	451
292	111
293	650
294	859
295	1054
296	726
297	1718
298	79
299	1119
300	232
301	773
302	389
303	262
304	262
305	192
306	174
307	310
308	62
309	128
310	122
311	64
312	38
313	125
314	586
315	371
316	213
317	132
318	272
319	130
320	418
321	87
322	597
323	18
324	268
325	956
326	286
327	193
328	275
329	344
330	481
331	65
332	60
333	62
334	48
335	39
336	166
337	493
338	282
339	621
340	38
341	52
342	172
343	66
344	54
345	81
346	56
347	34
348	929
349	38
350	39
351	44
352	902
353	528
354	50
355	28
356	24
357	40
358	91
359	60
360	763
361	67
362	874
363	414
364	150
365	891
366	638
367	460
368	1729
369	23
370	684
371	1090
372	88
373	74
374	589
375	620
376	252
377	591
378	164
379	348
380	1472
381	1165
382	143
383	399
384	895
385	120
386	1134
387	1194
388	80
389	482
390	634
391	25
392	165
393	243
394	64
395	2204
396	1033
397	2068
398	283
399	247
400	103
401	12
402	229
403	47
404	42
405	251
406	1006
407	157
408	159
409	517
410	476
411	450
412	135
413	129
414	91
415	154
416	125
417	91
418	255
419	197
420	46
421	75
422	472
423	184
424	130
425	534
426	300
427	47
428	408
429	46
430	334
431	101
432	654
433	739
434	56
435	67
436	16
437	60
438	99
439	30
440	47
441	96
442	101
443	94
444	44
445	111
446	57
447	263
448	319
449	572
450	70
451	136
452	79
453	351
454	61
455	446
456	52
457	69
458	838
459	854
460	174
461	44
462	40
463	170
464	53
465	242
466	38
467	50
468	89
469	73
470	71
471	77
472	130
473	469
474	35
475	850
476	640
477	391
478	367
479	38
480	136
481	55
482	774
483	108
484	336
485	103
486	191
487	64
488	84
489	662
490	135
491	52
492	282
493	644
494	143
495	101
496	144
497	205
498	327
499	226
500	258
501	127
502	172
503	15
504	30
505	36
506	16
507	52
508	56
509	42
510	139
511	399
512	176
513	73
514	135
515	139
516	67
517	92
518	19
519	36
520	188
521	87
522	60
523	85
1	80
2	82
3	207
4	54
5	273
6	82
7	293
8	870
9	254
10	83
11	143
12	304
13	139
14	1695
15	125
16	54
17	387
18	956
19	200
20	81
21	400
22	85
23	53
24	113
25	284
26	185
27	152
28	56
29	1015
30	477
31	1941
32	1060
33	1937
34	150
35	2038
36	106
37	697
38	962
39	1351
40	589
41	1319
42	108
43	212
44	1253
45	2311
46	1257
47	95
48	117
49	619
50	38
51	335
52	357
53	100
54	49
55	239
56	141
57	394
58	285
59	109
60	90
61	38
62	40
63	27
64	214
65	150
66	45
67	160
68	247
69	357
70	118
71	95
72	156
73	76
74	404
75	121
76	321
77	52
78	161
79	1423
80	892
81	77
82	896
83	847
84	812
[truncated: 1,866 more rows]

## Sheet: Ctrl3_050220
Mib1f/f			Ctrl 3
30d chase after tmx
Injury & 14d regeneration
Cross Sectional Area of Injured Fibers
	Area (μm2)
1	458
2	1009
3	1534
4	1648
5	1095
6	1150
7	752
8	1090
9	1086
10	485
11	704
12	1639
13	1270
14	680
15	886
16	1071
17	1630
18	665
19	1520
20	959
21	631
22	981
23	563
24	1641
25	1950
26	985
27	1179
28	545
29	1802
30	1313
31	1116
32	1412
33	778
34	1171
35	1098
36	727
37	1818
38	2326
39	1211
40	1119
41	1506
42	1507
43	946
44	1479
45	1455
46	1140
47	834
48	1114
49	1072
50	858
51	944
52	543
53	568
54	720
55	866
56	977
57	976
58	2401
59	613
60	1476
61	623
62	2937
63	2224
64	719
65	2031
66	609
67	902
68	1201
69	1761
70	638
71	995
72	1347
73	801
74	1548
75	1029
76	1566
77	2148
78	812
79	825
80	757
81	742
82	1832
83	2246
84	821
85	401
86	1773
87	1012
88	1758
89	1163
90	1499
91	1728
92	799
93	1178
94	508
95	744
96	781
97	924
98	1551
99	2330
100	1675
101	1238
102	594
103	693
104	643
105	2166
106	2177
107	1247
108	2478
109	1339
110	1028
111	1355
112	1966
113	1895
114	2237
115	1926
116	1242
117	861
118	1165
119	701
120	1033
121	675
122	1276
123	1517
124	1015
125	1472
126	506
127	651
128	1293
129	1146
130	1924
131	628
132	704
133	706
134	1766
135	1420
136	874
137	692
138	608
139	561
140	763
141	780
142	2021
143	2322
144	874
145	1213
146	1099
147	1629
148	521
149	842
150	921
151	606
152	1208
153	499
154	1823
155	2075
156	1648
157	597
158	781
159	786
160	1300
161	1627
162	1340
163	1983
164	1161
165	1085
166	1038
167	801
168	1316
169	3003
170	1168
171	1427
172	875
173	709
174	3089
175	1458
176	613
177	1815
178	2179
179	1479
180	1125
181	962
182	1314
183	557
184	2035
185	601
186	1338
187	799
188	1766
189	1119
190	951
191	537
192	1227
193	679
194	1109
195	819
196	1054
197	1659
198	627
199	959
200	1734
201	1834
202	2324
203	601
204	552
205	2629
206	1297
207	1719
208	548
209	1036
210	1329
211	3049
212	638
213	967
214	873
215	1376
216	887
217	520
218	425
219	744
220	2017
221	2132
222	979
223	540
224	913
225	831
226	1031
227	805
228	1644
229	639
230	552
231	1671
232	1243
233	966
234	910
235	2138
236	724
237	789
238	1304
239	546
240	1536
241	631
242	1716
243	1124
244	968
245	1852
246	581
247	869
248	483
249	1597
250	553
251	418
252	696
253	1195
254	738
255	1128
256	627
257	574
258	1255
259	759
260	1757
261	1778
262	2375
263	880
264	551
265	957
266	1265
267	491
268	650
269	528
270	1221
271	692
272	2318
273	1200
274	1068
275	949
276	607
277	774
278	1076
279	1044
280	600
281	847
282	1001
283	1221
284	979
285	781
286	1592
287	755
288	902
289	992
290	1648
291	601
292	812
293	489
294	1459
295	1149
296	1776
297	1578
298	1390
299	738
300	861
301	439
302	1268
303	636
304	1203
305	1093
306	987
307	1020
308	818
309	1221
310	562
311	831
312	635
313	462
314	431
315	1917
316	799
317	1205
318	673
319	976
320	1042
321	824
322	1543
323	614
324	983
325	1094
326	779
327	1259
328	1179
329	743
330	1085
331	820
332	748
333	1045
334	1630
335	904
336	1239
337	835
338	1232
339	872
340	1415
341	1116
342	1811
343	2167
344	909
345	2168
346	1084
347	1570
348	903
349	1004
350	497
351	427
352	986
353	1023
354	801
355	901
356	527
357	715
358	727
359	703
360	832
361	959
362	829
363	1910
364	504
365	1469
366	594
367	1109
368	697
369	1035
370	881
371	792
372	1872
373	613
374	793
375	1273
376	1924
377	953
378	666
379	1789
380	750
381	1599
382	485
383	1425
384	705
385	860
386	1181
387	864
388	830
389	808
390	586
391	2536
392	900
393	1183
394	493
395	492
396	654
397	1290
398	2404
399	1318
400	1191
401	1327
402	1532
403	1108
404	1033
405	1142
406	669
407	1189
408	592
409	2182
410	801
411	889
412	522
413	2061
414	1153
415	1396
416	1258
417	565
418	1077
419	732
420	596
421	748
422	779
423	2001
424	1495
425	1581
426	1172
427	1313
428	1087
429	1423
430	657
431	1413
432	926
433	586
434	918
435	2219
436	1164
437	976
438	2048
439	2412
440	708
441	1123
442	668
443	1361
444	1459
445	1383
446	572
447	547
448	1168
449	2170
450	879
451	1200
452	492
453	706
454	1383
455	1046
456	806
457	1394
458	644
459	671
460	1461
461	1050
462	937
463	725
464	2552
465	698
466	1506
467	1403
468	132
469	486
470	377
471	1682
472	523
473	617
474	1044
475	829
476	264
477	2179
478	630
479	545
480	707
481	363
482	430
483	619
484	390
485	638
486	757
487	354
488	597
489	786
490	693
491	727
492	330
493	537
494	405
495	303
496	560
497	375
498	1747
499	506
500	648
501	629
502	807
503	584
504	502
505	552
506	305
507	175
508	761
509	1771
510	259
511	297
512	351
513	683
514	2472
515	422
1	688
2	3074
3	939
4	625
5	997
6	930
7	552
8	739
9	1577
10	453
11	864
12	1202
13	559
14	1523
15	1326
16	3136
17	1315
18	463
19	1205
20	1055
21	1032
22	2163
23	1633
24	953
25	951
26	845
27	1943
28	2209
29	860
30	634
31	1636
32	1156
33	1465
34	1827
35	1026
36	2788
37	625
38	544
39	1307
40	626
41	1211
42	862
43	1133
44	1050
45	1563
46	1832
47	1506
48	1762
49	475
50	1090
51	1985
52	1075
53	1355
54	520
55	596
56	1316
57	492
58	1188
59	797
60	1072
61	1093
62	1218
63	1262
64	1252
65	639
66	977
67	2199
68	1164
69	2791
70	2819
71	738
72	1568
73	834
74	795
75	1073
76	996
77	1655
78	493
79	758
80	1134
81	1512
82	455
83	805
84	1199
85	512
86	1224
87	2934
88	1112
89	1597
90	2353
91	985
92	1239
93	603
94	2556
95	1776
96	1216
97	1300
98	1326
99	1014
100	854
101	1472
102	429
103	1563
104	2013
105	1032
106	1941
107	1454
108	1260
109	945
110	1381
111	2442
112	2988
113	938
114	2863
115	3037
116	1764
117	2963
118	1613
119	1182
120	1084
121	447
122	1548
123	556
124	987
125	765
126	928
127	881
128	799
129	1261
130	1311
131	451
132	449
133	1471
134	1678
135	1218
136	1188
137	962
138	1757
139	1714
140	992
141	1038
142	665
143	799
144	965
145	1561
146	2930
147	731
148	818
149	1106
150	1317
151	1841
152	959
153	1350
154	829
155	1803
156	659
157	1139
158	886
159	510
160	587
161	714
162	544
163	1729
164	1477
165	1644
166	1210
167	606
168	1309
169	888
170	1081
171	719
172	1169
173	947
174	952
175	1164
176	766
177	732
178	556
179	2227
180	1353
181	1045
182	1403
183	952
184	1360
185	812
186	995
187	1238
188	1988
189	2361
190	631
191	1685
192	2068
193	1236
194	993
195	666
196	839
197	1136
198	369
199	1689
200	1566
201	477
202	910
203	2380
204	949
205	712
206	1720
207	3226
208	1648
209	752
210	556
211	1821
212	687
213	667
214	1479
215	526
216	677
217	2036
218	1253
219	493
220	546
221	1171
222	1451
223	945
224	403
225	917
226	1328
227	1211
228	1218
229	605
230	837
231	1132
232	1674
233	2764
234	638
235	1540
236	1278
237	529
238	839
239	1877
240	1139
241	783
242	1363
243	488
244	2272
245	1393
246	436
247	1755
248	1834
249	1401
250	1336
251	967
252	718
253	820
254	432
255	1381
256	1033
257	537
258	1354
259	1560
260	1338
261	858
262	462
263	1091
264	1422
265	1002
266	1474
267	2114
268	707
269	1867
270	1388
271	1812
272	1246
273	1077
274	1113
275	1126
276	1104
277	441
278	1014
279	1162
280	564
281	1265
282	660
283	771
284	1344
285	958
286	1583
287	994
288	733
289	685
290	560
291	1260
292	2614
293	630
294	848
295	456
296	823
297	1394
298	1430
299	791
300	1072
301	1277
302	1701
303	501
304	591
305	1302
306	890
307	2408
308	1185
309	1018
310	2588
311	791
312	866
313	511
314	981
315	772
316	1106
317	877
318	730
319	1188
320	575
321	1360
322	669
323	627
324	618
325	858
326	1506
327	1993
328	649
329	1150
330	2634
331	888
332	1013
333	1403
334	475
335	1221
336	1188
337	1687
338	1359
339	996
340	930
341	690
342	549
343	746
344	428
345	359
346	402
347	1504
348	1942
349	1983
350	1358
351	839
352	1168
353	474
354	611
355	499
356	902
357	327
358	504
359	671
360	852
361	1488
362	695
363	592
364	423
365	463
366	250
367	515
368	1048
369	1030
370	333
371	435
372	490
373	1980
374	506
375	553
376	309
377	524
378	395
379	600
380	309
381	374
382	545
383	201
384	172
385	422
386	804
387	405
388	500
389	282
390	1172
391	926
392	565
393	824
394	788
395	1903
1	1526
2	1547
3	2096
4	1995
5	1479
6	1774
7	1124
8	1864
9	2673
10	3222
11	1848
12	1562
13	1825
14	1792
15	3418
16	1403
17	1917
18	1353
19	1207
20	1782
21	2607
22	1141
23	834
24	1843
25	1430
26	1643
27	3397
28	3192
29	2021
30	1841
31	2347
32	1503
33	2121
34	2633
35	1792
36	451
37	1104
38	1583
39	1780
40	1690
41	1718
42	1430
43	2227
44	1845
45	1449
46	2402
47	2172
48	1600
49	1921
50	1476
51	1764
52	1542
53	943
54	1098
55	1002
56	1367
57	1144
58	2072
59	1282
60	2282
61	805
62	1644
63	2522
64	1544
65	1672
66	1409
67	2094
68	1685
69	1147
70	2450
71	1041
72	2438
73	1246
74	974
75	1583
76	1701
77	2224
78	1486
79	1019
80	1750
81	1496
82	2399
83	1699
84	1166
85	1676
86	2187
87	1791
88	2364
89	2792
90	1494
91	1505
92	1266
93	1428
94	1230
95	811
96	2310
97	1186
98	1517
99	1222
100	1361
101	2074
102	1690
103	1796
104	1338
105	1571
106	1717
107	607
108	1500
109	2134
110	1383
111	1575
112	1260
113	968
114	518
115	1093
116	779
117	1262
118	1539
119	1289
120	1529
121	1884
122	1205
123	960
124	1638
125	1413
126	550
127	799
128	1526
129	1217
130	1040
131	1362
132	1355
133	689
134	2967
135	1797
136	1107
137	588
138	1758
139	1470
140	852
141	529
142	1465
143	2086
144	759
145	1824
146	1467
147	2292
148	1071
149	1061
150	958
151	1021
152	811
153	675
154	2778
155	759
156	826
157	974
158	1120
159	1352
160	764
161	1129
162	1098
163	889
164	617
165	2243
166	981
167	1221
168	889
169	1016
170	724
171	1724
172	787
173	469
174	765
175	1130
176	2250
177	877
178	1131
179	690
180	776
181	710
182	1488
183	860
184	1252
185	1486
186	1173
187	747
188	1668
189	1384
190	548
191	1255
192	1131
193	788
194	1077
195	1859
196	2135
197	2464
198	775
199	1196
200	1400
201	2501
202	1060
203	2055
204	739
205	2032
206	1074
207	1270
208	1470
209	1400
210	1289
211	2418
212	1861
213	2211
214	962
215	721
216	1251
217	1119
218	751
219	1172
220	1305
221	1344
222	1788
223	559
224	1451
225	1148
226	1488
227	631
228	488
229	1206
230	2149
231	1311
232	698
233	1010
234	927
235	950
236	1330
237	1050
238	1448
239	2236
240	1144
241	1230
242	1229
243	1769
244	1077
245	1206
246	888
247	1182
248	763
249	1453
250	1678
251	671
252	641
253	630
254	1082
255	927
256	661
257	1088
258	1314
259	637
260	1385
261	690
262	2347
263	1092
264	1398
265	3082
266	1333
267	1197
268	1413
269	859
270	1959
271	835
272	1784
273	1612
274	1675
275	1845
276	3077
277	1346
278	1807
279	2297
280	1157
281	1124
282	2025
283	1006
284	1461
285	600
286	2638
287	1102
288	1180
289	796
290	972
291	1000
292	624
293	677
294	475
295	1292
296	817
297	1248
298	2082
299	711
300	1209
301	746
302	1242
303	978
304	1321
305	501
306	839
307	1398
308	1203
309	499
310	1013
311	1895
312	1460
313	1198
314	858
315	721
316	491
317	1069
318	2384
319	1763
320	1580
321	454
322	1492
323	1761
324	839
325	875
326	3036
327	1093
328	1008
329	578
330	1603
331	533
332	588
333	1705
334	814
335	2485
336	1904
337	715
338	3028
339	833
340	1193
341	1930
342	2075
343	884
344	1489
345	842
346	1911
347	761
348	1022
349	831
350	2324
351	766
352	936
353	707
354	1388
355	1952
356	990
357	1322
358	1245
359	1651
360	1792
361	649
362	2824
363	674
364	480
365	2650
366	1941
367	1057
368	584
369	1604
370	464
371	643
372	1348
373	1065
374	866
375	1127
376	471
377	622
378	900
379	742
380	1179
381	2431
382	2860
383	919
384	1565
385	1606
386	1028
387	970
388	2708
389	762
390	1692
391	3190
392	628
393	1291
394	1090
395	1057
396	1268
397	1015
398	1418
399	1247
400	1532
401	1834
402	553
403	848
404	534
405	625
406	1932
407	559
408	829
409	1551
410	570
411	2028
412	2404
413	1405
414	524
415	416
416	1403
417	3381
418	567
419	512
420	1724
421	1085
422	502
423	1086
424	532
425	1364
426	1280
427	1186
428	3175
429	1513
430	1693
431	1449
432	581
433	1182
434	945
435	2053
436	1132
437	796
438	1013
439	538
440	2504
441	916
442	1630
443	610
444	1218
445	722
446	2418
447	2771
448	2102
449	783
450	1482
451	786
452	687
453	1000
454	616
455	933
456	549
457	752
458	1576
459	3050
460	549
461	1338
462	451
463	1063
464	1028
465	1612
466	953
467	859
468	2737
469	550
470	1167
471	624
472	562
473	501
474	615
475	436
476	899
477	1841
478	414
479	459
480	508
481	649
482	704
483	859
484	528
485	349
486	788
487	251
488	307
489	2385
490	425
491	353
492	374
493	737
494	295
495	340
496	603
497	801
498	855
499	877
500	518
501	334
502	617
503	286
504	395
505	428
506	462
507	913
508	237
509	728
510	346
511	437
512	741
513	532
514	377
515	962
516	455
517	1029
518	399
519	960
520	477
521	911
522	278
523	302
524	423
525	447
526	580
527	496
528	573
529	448
530	1101
531	346
532	764
533	432
534	618
1	1320
2	627
3	1734
4	1176
5	1396
6	1346
7	2323
8	1705
9	1890
10	2250
11	1525
12	1338
13	1412
14	2235
15	702
16	1293
17	1982
18	2642
19	1054
20	1673
21	1622
22	1425
23	651
24	1132
25	800
26	1548
27	750
28	1390
29	365
30	1474
31	1831
32	2612
33	1022
34	1665
35	990
36	577
37	1298
38	716
39	1500
40	815
41	1479
42	875
43	405
44	1039
45	976
46	552
47	2050
48	1794
49	1409
50	1792
51	898
52	738
53	1098
54	547
55	478
56	1588
57	2297
58	1782
59	670
60	1268
61	1452
62	1077
63	957
64	811
65	662
66	896
67	2164
68	533
69	1567
70	1060
71	929
72	1622
73	1191
74	2199
75	979
76	596
77	1914
78	714
79	1490
80	537
81	912
82	1298
83	961
84	1960
85	1444
86	537
87	900
88	1041
89	1249
90	1185
91	1965
92	1265
93	783
94	847
95	730
96	946
97	670
98	767
99	1101
100	2137
101	1443
102	848
103	1229
104	2314
105	694
106	1915
107	675
108	1430
109	1535
110	904
111	1539
112	601
113	820
114	1137
115	1722
116	1116
117	1402
118	1778
119	559
120	1287
121	2051
122	769
123	2492
124	923
125	1248
126	527
127	1868
128	840
129	726
130	934
131	954
132	905
133	1772
134	1196
135	912
136	1297
137	1458
138	780
139	1807
140	1440
141	1570
142	1068
143	735
144	1319
145	456
146	561
147	1021
148	938
149	1588
150	2144
151	775
152	520
153	1123
154	952
155	2991
156	792
157	2135
158	753
159	830
160	1350
161	1198
162	1352
163	736
164	968
165	734
166	912
167	2562
168	1027
169	452
170	2060
171	1207
172	651
173	2333
174	1017
175	596
176	1008
177	2153
178	671
179	507
180	1727
181	1025
182	1209
183	1082
184	1096
185	1485
186	857
187	1028
188	1335
189	900
190	1387
191	2413
192	2029
193	1317
194	758
195	1378
196	1408
197	973
198	1089
199	1139
200	603
201	580
202	996
203	1198
204	866
205	909
206	744
207	1036
208	1593
209	3445
210	2479
211	742
212	661
213	2786
214	1055
215	1863
216	676
217	1213
218	1152
219	1044
220	1352
221	1186
222	1212
223	560
224	1034
225	2135
226	2004
227	2115
228	2264
229	1555
230	766
231	2114
232	1413
233	1943
234	719
235	746
236	616
237	1289
238	1065
239	2725
240	722
241	642
242	1209
243	908
244	542
245	504
246	1066
247	1357
248	811
249	1117
250	720
251	675
252	909
253	1635
254	788
255	1762
256	1004
257	1743
258	994
259	1497
260	1887
261	1138
262	1379
263	1109
264	1125
265	2392
266	1148
267	1039
268	1264
269	1845
270	1723
271	1195
272	1222
273	778
274	1071
275	1028
276	910
277	2674
278	1593
279	1112
280	1507
281	2282
282	2044
283	1718
284	1333
285	845
286	1235
287	706
288	1372
289	855
290	1082
291	1634
292	1270
293	1040
294	885
295	1203
296	1011
297	905
298	1717
299	743
300	1015
301	970
302	1471
303	462
304	2527
305	1577
306	464
307	972
308	840
309	784
310	1474
311	1727
312	1074
313	1106
314	1891
315	2010
316	769
317	671
318	948
319	1219
320	1247
321	1295
322	2657
323	1542
324	1089
325	833
326	591
327	674
328	546
329	1837
330	1100
331	804
332	2089
333	2228
334	1575
335	717
336	1002
337	961
338	683
339	2046
340	1527
341	2039
342	1013
343	1961
344	1918
345	1720
346	1522
347	760
348	1061
349	1423
350	1129
351	873
352	1237
353	938
354	1071
355	1395
356	803
357	1875
358	1258
359	616
360	700
361	1253
362	1529
363	1121
364	1308
365	1031
366	1780
367	1108
368	1899
369	1308
370	556
371	685
372	377
373	941
374	1510
375	1428
376	946
377	965
378	1256
379	836
380	1159
381	1276
382	1548
383	1543
384	710
385	1334
386	1564
387	2128
388	1182
389	2156
390	2507
391	1695
392	829
393	820
394	960
395	1027
396	1283
397	1131
398	1289
399	1639
400	1503
401	1212
402	1291
403	921
404	1173
405	1100
406	1761
407	470
408	2367
409	1811
410	1186
411	823
412	1805
413	1433
414	1619
415	1670
416	1155
417	1408
418	803
419	911
420	601
421	1214
422	1772
423	557
424	2387
425	927
426	1142
427	1120
428	2729
429	952
430	626
431	1051
432	1343
433	614
434	1644
435	1092
436	1706
437	2250
438	2298
439	1803
440	1371
441	1043
442	828
443	1183
444	1205
445	768
446	921
447	1620
448	1906
449	2134
450	1114
451	1029
452	1106
453	1755
454	1199
455	1628
456	1775
457	851
458	1973
459	802
460	1159
461	1466
462	1268
463	1377
464	1056
465	1134
466	1625
467	2083
468	882
469	1616
470	930
471	1041
472	654
473	1407
474	1910
475	944
476	952
477	563
478	1175
479	2584
480	1631
481	1916
482	1762
483	534
484	1722
485	1270
486	1399
487	744
488	1066
489	703
490	2013
491	1332
492	1121
493	1357
494	1509
495	956
496	594
497	503
498	491
499	682
500	718
501	650
502	416
503	251
504	417
505	776
506	774
507	1278
508	398
509	660
510	664
511	472
512	2144
513	949
514	240
515	512
516	888
517	224
518	747
519	822
520	282
521	768
522	653
523	672
524	711
525	1021
526	797
527	235
528	619
529	609
530	879
531	869
532	577
533	1472
1	2055
2	668
3	1772
4	1979
5	780
6	458
7	743
8	1159
9	613
10	1054
11	1093
12	695
13	454
14	1930
15	505
16	641
17	1654
18	1562
[truncated: 742 more rows]

## Sheet: Ctrl6_050220
Mib1f/f			Ctrl 6
30d chase after tmx
Injury & 14d regeneration
Cross Sectional Area of Injured Fibers
	Area (μm2)
1	2593
2	718
3	2781
4	3496
5	531
6	1747
7	1176
8	2353
9	1374
10	1035
11	1387
12	1795
13	3161
14	595
15	988
16	1501
17	1092
18	776
19	1136
20	1854
21	2668
22	1626
23	1285
24	1396
25	704
26	1950
27	482
28	2081
29	1591
30	2125
31	1799
32	419
33	1755
34	1641
35	1848
36	2992
37	1071
38	868
39	1395
40	1133
41	1348
42	1126
43	2194
44	1832
45	1012
46	1341
47	1309
48	2541
49	635
50	2113
51	3173
52	421
53	1254
54	2299
55	1843
56	649
57	891
58	1175
59	2898
60	524
61	874
62	870
63	1877
64	1464
65	458
66	670
67	1721
68	2213
69	1077
70	469
71	1148
72	767
73	2169
74	690
75	1089
76	569
77	1776
78	733
79	1995
80	2480
81	2499
82	709
83	1824
84	2483
85	788
86	2162
87	2121
88	866
89	590
90	1306
91	1871
92	499
93	1069
94	1190
95	1155
96	2244
97	748
98	1717
99	3019
100	1521
101	1582
102	799
103	1364
104	1573
105	630
106	764
107	1226
108	2219
109	1385
110	1249
111	1097
112	1155
113	1297
114	1111
115	1722
116	2618
117	1680
118	1478
119	1057
120	930
121	920
122	776
123	1570
124	2385
125	2774
126	1154
127	2617
128	2405
129	941
130	1862
131	1188
132	3197
133	1428
134	575
135	804
136	986
137	750
138	1530
139	779
140	540
141	913
142	2447
143	2030
144	1916
145	451
146	2919
147	2314
148	602
149	1102
150	1085
151	1633
152	357
153	1008
154	1777
155	1828
156	537
157	2159
158	426
159	598
160	1292
161	447
162	2001
163	1276
164	1879
165	2521
166	548
167	2616
168	2903
169	542
170	429
171	867
172	2515
173	1913
174	2434
175	1147
176	1229
177	2875
178	1337
179	2863
180	1028
181	2255
182	1282
183	2425
184	885
185	1382
186	2941
187	818
188	1291
189	2146
190	1058
191	2070
192	559
193	1359
194	1172
195	1703
196	1309
197	1258
198	1180
199	1804
200	1146
201	2121
202	1577
203	2127
204	636
205	1221
206	1153
207	963
208	819
209	856
210	3072
211	814
212	2341
213	964
214	1626
215	1741
216	1088
217	820
218	2385
219	582
220	771
221	1340
222	1094
223	683
224	2774
225	3126
226	1745
227	1305
228	950
229	1893
230	1770
231	1005
232	728
233	2171
234	2788
235	530
236	774
237	1724
238	801
239	2016
240	1757
241	2743
242	1035
243	1133
244	438
245	864
246	2564
247	2293
248	504
249	1000
250	1330
251	717
252	787
253	1897
254	1472
255	977
256	778
257	758
258	1153
259	798
260	1747
261	1439
262	685
263	1966
264	1944
265	2164
266	1819
267	961
268	1985
269	1167
270	1366
271	1027
272	899
273	1620
274	2347
275	1452
276	701
277	1436
278	1779
279	849
280	2570
281	984
282	996
283	2131
284	617
285	900
286	947
287	1131
288	2440
289	1493
290	1313
291	1987
292	2077
293	534
294	1507
295	765
296	764
297	1578
298	2073
299	973
300	578
301	2309
302	1890
303	1608
304	1133
305	1036
306	1367
307	2128
308	2510
309	2292
310	747
311	1133
312	1624
313	1224
314	1984
315	2274
316	428
317	1998
318	940
319	2251
320	2292
321	1858
322	1634
323	1890
324	1480
325	1829
326	1394
327	2602
328	2424
329	1254
330	912
331	910
332	839
333	1391
334	1844
335	1878
336	616
337	706
338	632
339	1247
340	559
341	689
342	965
343	1529
344	821
345	3159
346	1287
347	734
348	840
349	812
350	1090
351	2352
352	918
353	1272
354	706
355	663
356	932
357	760
358	1881
359	2187
360	1434
361	3347
362	938
363	1104
364	1288
365	589
366	537
367	2108
368	1063
369	1758
370	1886
371	446
372	940
373	536
374	695
375	643
376	1001
377	995
378	1247
379	739
380	1814
381	3778
382	830
383	1007
384	2652
385	1377
386	2961
387	2860
388	2340
389	1756
390	612
391	652
392	2052
393	441
394	1121
395	687
396	1450
397	848
398	633
399	2012
400	962
401	991
402	2292
403	2345
404	1654
405	691
406	3664
407	2061
408	1318
409	637
410	1550
411	1083
412	718
413	666
414	1043
415	561
416	1016
417	570
418	1000
419	1285
420	2739
421	435
422	203
423	696
424	515
425	439
426	361
427	358
428	238
429	417
430	334
431	569
432	273
433	674
434	569
435	388
436	457
437	369
438	194
439	308
440	320
441	716
442	367
443	576
444	521
445	910
446	340
447	224
448	702
449	313
450	178
451	367
452	896
453	573
454	931
455	516
456	687
457	660
458	657
459	670
460	860
461	187
462	335
463	552
464	725
465	632
466	566
467	437
468	376
469	297
470	183
471	251
472	278
473	333
474	376
475	594
476	281
477	325
478	196
479	226
480	252
481	572
482	381
483	392
484	355
485	381
486	356
487	381
488	546
489	459
490	374
491	321
492	790
493	474
494	387
495	376
496	501
497	505
498	438
499	293
500	298
1	709
2	554
3	3650
4	2059
5	1320
6	526
7	1116
8	2216
9	636
10	510
11	2713
12	1898
13	1083
14	1440
15	736
16	387
17	665
18	1043
19	567
20	1549
21	2217
22	729
23	1391
24	2949
25	574
26	1390
27	1461
28	2480
29	796
30	1834
31	500
32	1620
33	2628
34	1669
35	1648
36	990
37	1722
38	3038
39	477
40	789
41	1229
42	1475
43	2117
44	1137
45	1723
46	590
47	1397
48	400
49	2295
50	1289
51	935
52	1905
53	385
54	604
55	2411
56	1414
57	635
58	1319
59	727
60	1968
61	530
62	1313
63	1131
64	1597
65	1113
66	1457
67	641
68	1426
69	471
70	462
71	991
72	1861
73	538
74	2345
75	812
76	850
77	2197
78	508
79	1040
80	676
81	1375
82	829
83	1208
84	2008
85	1527
86	1785
87	2760
88	1960
89	913
90	829
91	1186
92	2379
93	1127
94	861
95	666
96	1728
97	504
98	3269
99	1077
100	625
101	533
102	542
103	471
104	447
105	1841
106	988
107	1476
108	817
109	836
110	1251
111	743
112	1232
113	988
114	674
115	1612
116	2032
117	1656
118	930
119	3185
120	850
121	1857
122	1359
123	433
124	1518
125	1791
126	2544
127	464
128	1520
129	2169
130	435
131	675
132	1533
133	1919
134	1101
135	1888
136	608
137	1898
138	965
139	1240
140	542
141	660
142	1466
143	1819
144	1581
145	2659
146	970
147	1018
148	2093
149	962
150	2175
151	1313
152	548
153	602
154	892
155	687
156	1274
157	658
158	717
159	835
160	580
161	613
162	763
163	513
164	445
165	2732
166	812
167	654
168	2339
169	842
170	730
171	575
172	565
173	303
174	376
175	176
176	379
177	875
178	2209
179	396
180	463
181	731
182	237
183	320
184	283
185	404
186	399
187	169
188	415
189	551
190	559
191	165
192	212
193	148
194	724
195	1068
196	401
197	298
198	332
199	775
200	213
201	501
202	222
203	337
204	566
205	326
206	353
207	460
208	330
209	1324
210	297
211	256
212	237
213	808
214	489
215	510
216	277
217	234
218	237
219	276
220	179
221	412
222	437
223	736
224	300
225	404
226	305
227	419
228	714
229	322
230	651
231	363
232	507
233	576
234	615
235	437
236	294
237	406
238	335
239	371
240	485
241	474
242	322
243	1178
244	587
245	773
246	172
247	152
248	384
249	531
250	499
251	387
252	341
253	221
254	218
255	319
256	341
257	559
258	610
259	397
260	492
261	292
262	381
263	403
264	1042
265	984
266	1829
267	3106
268	461
269	603
270	1062
271	812
272	575
273	469
274	377
275	739
276	1183
277	1834
278	135
279	1031
280	1205
281	1113
282	2122
283	1182
284	1589
285	569
286	199
287	283
288	269
289	506
290	765
291	1553
292	1659
293	1346
294	1205
295	792
296	246
297	872
298	1170
299	451
300	392
301	1565
302	1371
303	335
304	1152
305	1041
306	997
307	1680
308	302
309	894
310	260
311	1524
312	778
313	562
314	188
315	425
316	221
317	866
318	670
319	1306
320	1325
321	243
322	304
323	432
324	911
325	469
326	447
327	1891
328	2472
329	961
330	1337
331	248
332	387
333	738
334	2545
335	260
336	2207
337	2076
338	1321
339	1550
340	290
341	243
342	197
343	615
344	1152
345	602
346	2503
347	1303
348	958
349	2746
350	493
351	452
352	542
353	1359
354	387
355	1576
356	1012
357	1834
358	1311
359	2246
360	1722
361	1871
362	376
363	1674
364	1405
365	1101
366	621
367	2766
368	2092
369	2967
370	1903
371	796
372	856
373	1236
374	1062
375	2030
376	1695
377	1368
378	406
379	393
380	1436
381	1111
382	984
383	290
384	364
385	2217
386	1125
387	371
388	1619
389	1118
390	540
391	760
392	343
393	648
394	548
395	577
396	1250
397	1515
398	2527
399	2503
400	2199
401	625
402	1101
403	2489
404	1457
405	1775
406	2599
407	947
408	514
409	1415
410	1628
411	998
412	2446
413	1769
414	1633
415	1490
416	3123
417	2680
418	1675
419	1271
420	1743
421	1518
422	2005
423	2463
424	1892
425	1785
426	612
427	667
428	457
429	550
430	541
431	1963
432	2579
433	201
434	311
435	312
436	376
437	158
438	278
439	1386
440	4297
441	1242
442	3482
443	3594
444	1184
445	3709
446	5433
447	2701
448	1603
449	1344
450	8484
451	5697
452	1691
453	3482
454	1828
455	4110
456	4570
457	4674
458	1401
459	1528
460	1368
461	7899
462	4103
463	1509
464	7056
465	2340
466	1542
467	2832
468	4158
469	1581
470	5421
471	4361
472	4181
473	1752
474	1107
475	1848
476	3523
477	11520
478	5288
479	4557
480	2488
481	2283
482	2949
483	2652
484	6194
485	1778
486	3461
487	6246
488	3024
489	2210
490	2121
491	1422
492	2469
493	1331
494	1683
495	3412
496	1411
497	6877
498	1464
499	1298
500	1366
501	2795
502	2027
503	8046
504	1427
505	1313
506	6350
507	5608
508	2607
509	1978
510	1850
511	2093
512	3930
513	1206
514	1833
515	1652
516	1722
517	3410
518	2336
519	1178
520	1346
521	4434
522	3372
523	2357
524	4823
525	1564
526	1871
527	4815
528	4628
529	5653
530	2186
531	1902
532	4981
533	1589
534	2046
535	6898
536	3863
537	2001
538	2197
539	1177
540	3536
541	1541
542	2369
543	3780
544	4480
545	2579
546	2739
547	1830
548	1658
549	3202
550	1545
551	5538
552	1506
553	4929
554	1932
555	1991
556	3360
557	1931
558	2817
559	1842
560	1961
561	2489
562	1586
563	3372
564	2370
565	842
566	395
567	322
568	1259
569	590
570	813
571	553
572	1279
573	786
574	782
575	920
576	542
577	614
578	444
579	1272
580	1015
581	1276
582	627
583	1329
584	1596
585	686
586	666
587	572
588	864
589	999
590	1102
591	1009
592	522
593	462
594	729
595	1331
596	843
597	827
598	1109
599	1364
600	1002
601	1746
602	718
603	928
604	739
605	1553
606	4087
607	1202
608	841
609	648
610	3304
611	2455
612	2768
613	2526
614	733
615	1138
616	1250
617	579
618	2096
619	1427
620	858
621	1929
622	1158
623	839
624	1105
625	3819
626	3438
627	2117
628	1350
629	3187
630	4069
631	2712
632	2069
633	2061
634	946
635	1929
636	1396
637	1290
638	1536
639	2377
640	1241
641	1616
642	1337
643	639
644	842
645	1363
646	1532
647	1216
648	1093
649	2202
650	1117
651	1925
652	1556
653	2290
654	1232
1	1355
2	1524
3	923
4	2065
5	763
6	2400
7	962
8	1497
9	750
10	2744
11	1828
12	901
13	1100
14	2420
15	1405
16	1576
17	3699
18	576
19	4311
20	1819
21	740
22	1652
23	1228
24	1255
25	896
26	1409
27	855
28	844
29	1927
30	2306
31	1671
32	1634
33	853
34	662
35	1963
36	1777
37	1277
38	1341
39	1169
40	908
41	951
42	980
43	1184
44	554
45	551
46	902
47	455
48	2289
49	1634
50	1374
51	762
52	991
53	1208
54	1304
55	1182
56	603
57	1526
58	1164
59	782
60	3053
61	1025
62	952
63	1213
64	1240
65	756
66	1840
67	1397
68	2144
69	1229
70	2306
71	1554
72	1957
73	551
74	979
75	1260
76	1405
77	1660
78	1545
79	750
80	1280
81	1813
82	642
83	1444
84	1441
85	1597
86	3632
87	3972
88	753
89	1130
90	1590
91	1168
92	2166
93	667
94	467
95	2289
96	2225
97	1592
98	1609
99	1371
100	2505
101	1661
102	646
103	1508
104	707
105	1848
106	805
107	1361
108	813
109	1539
110	2334
111	1584
112	1859
113	1279
114	392
115	1888
116	1565
117	1024
118	1861
119	1754
120	1563
121	808
122	2132
123	695
124	1649
125	1330
126	1463
127	1235
128	3549
129	1318
130	2081
131	3037
132	915
133	1534
134	2861
135	954
136	1799
137	2541
138	2921
139	1350
140	1886
141	1653
142	4095
143	430
144	519
145	2967
146	1764
147	1461
148	1589
149	1830
150	1349
151	1322
152	1554
153	2589
154	1481
155	1980
156	1587
157	3958
158	1270
159	2343
160	1911
161	1663
162	1978
163	2732
164	670
165	1135
166	3435
167	1986
168	1502
169	1815
170	1384
171	3080
172	2396
173	1273
174	3364
175	1885
176	1677
177	854
178	1017
179	1593
180	4417
181	1671
182	1731
183	1410
184	1686
185	1894
186	1998
187	3154
188	3179
189	3192
190	992
191	1559
192	740
193	3724
194	1978
195	1238
196	1671
197	2535
198	1177
199	746
200	974
201	553
202	1002
203	1549
204	750
205	1988
206	2160
207	2454
208	2410
209	925
210	2051
211	2603
212	1987
213	1388
214	3629
215	1226
216	1235
217	1603
218	1265
219	1842
220	625
221	2378
222	3506
223	687
224	1594
225	1798
226	2222
227	791
228	842
229	1433
230	757
231	1280
232	1065
233	965
234	1415
235	2175
236	2746
237	2177
238	1529
239	1656
240	2142
241	827
242	1259
243	2103
244	951
245	1670
246	1561
247	624
248	2430
249	2923
250	626
251	1241
252	2260
253	1871
254	1395
255	3282
256	1793
257	1695
258	1740
259	1568
260	2500
261	1148
262	1057
263	775
264	1081
265	2412
266	1190
267	683
268	1440
269	1924
270	2838
271	4340
272	1723
273	2535
274	2595
275	1428
276	917
277	1295
278	870
279	1172
280	2936
281	1311
282	1401
283	2087
284	2314
285	894
286	1296
287	1646
288	1313
289	1952
290	1326
291	3045
292	2083
293	1174
294	1568
295	3531
296	2504
297	1695
298	475
299	703
300	1717
301	4730
302	886
303	3244
304	1278
305	1684
306	894
307	1395
308	2545
309	1538
310	1670
311	2186
312	1756
313	2401
314	1554
315	3030
316	1339
317	767
318	1079
319	1193
320	1853
321	1558
322	1127
323	1073
324	1210
325	1207
326	2001
327	889
328	1295
329	2066
330	1751
331	705
332	2138
333	1064
334	1305
335	2920
336	1205
337	1237
338	1884
339	499
340	1700
341	2421
342	2388
343	1082
344	1702
345	2236
346	954
347	1712
348	1584
349	1105
350	2044
351	626
352	2652
353	800
354	2504
355	811
356	2322
357	1283
358	2468
359	823
360	1624
361	1657
362	1988
363	1076
364	1355
365	1428
366	3355
367	891
368	913
369	3268
370	392
371	2130
372	2012
373	1810
374	1137
375	433
376	1300
377	547
378	2433
379	2080
380	2388
381	2756
382	1239
383	674
384	1906
385	2566
386	1658
387	2178
388	1305
389	658
390	3571
391	1188
392	1576
393	1244
394	2583
395	2432
396	678
397	2425
398	651
399	3314
400	464
401	1126
402	648
403	2028
404	1551
405	1588
406	2771
407	317
408	906
409	190
410	309
411	224
412	498
413	411
414	973
415	570
416	247
417	196
418	265
419	411
420	2661
421	1448
422	1360
423	310
424	390
425	154
426	118
427	446
428	138
429	362
430	324
431	120
432	1635
433	133
434	249
435	154
436	287
437	474
438	385
439	701
440	395
441	1180
442	962
443	472
444	270
445	286
446	416
447	900
448	323
449	376
450	150
451	195
452	482
453	233
454	955
455	450
456	260
457	468
458	476
459	340
460	369
461	509
462	475
463	244
464	266
465	440
466	309
467	140
468	423
469	493
470	492
471	283
472	106
473	241
474	458
475	853
476	375
477	273
478	294
479	702
480	322
481	232
482	221
483	240
484	279
485	331
486	344
487	331
488	435
489	420
490	336
491	720
492	205
493	171
494	349
495	428
496	595
497	378
498	268
499	367
500	554
501	584
502	473
503	472
504	565
505	288
506	271
507	243
508	202
509	198
510	205
511	457
512	624
513	327
514	390
515	400
516	306
517	267
518	554
519	121
520	115
521	156
522	242
523	441
524	1331
525	173
526	349
527	384
528	765
529	316
530	989
531	463
532	397
533	294
534	465
535	281
536	358
537	203
538	194
539	145
540	361
541	498
542	190
543	427
544	332
545	206
546	704
547	324
548	286
549	401
550	333
551	742
552	591
553	869
554	736
555	483
556	423
557	315
558	311
559	352
560	433
561	262
562	338
563	300
564	275
565	256
566	355
567	284
568	194
569	650
570	371
571	530
572	318
573	262
574	641
575	488
576	464
577	291
578	214
579	317
580	202
581	472
582	283
583	201
584	311
585	260
586	566
587	261
588	256
589	571
590	210
591	381
592	1219
593	264
594	474
595	554
596	696
597	387
1	1585
2	1443
3	621
4	3020
5	586
6	2058
7	455
8	785
9	393
10	901
11	1767
12	1346
13	2478
14	596
15	2413
16	727
17	1740
18	1070
19	2546
20	965
21	1163
22	1300
23	982
24	2039
25	1871
26	1406
27	1813
28	1308
29	1837
30	762
31	724
32	1601
33	2718
34	503
35	1364
36	1907
37	1123
38	673
39	903
40	831
41	1191
42	2091
43	1069
44	1262
45	1371
46	2435
47	1386
48	1395
49	1516
50	1726
51	736
52	1691
53	1531
54	1254
55	1438
56	1990
57	1053
58	1355
59	1613
60	2287
61	1769
62	529
63	991
64	1273
65	2282
66	902
67	1393
68	1937
69	1385
70	1839
71	2347
72	542
73	609
74	1736
75	420
76	2244
77	913
78	1153
79	1403
80	1659
81	1042
82	1541
83	875
84	1099
85	2023
86	830
87	982
88	816
89	1704
90	1567
91	413
92	1358
93	671
94	1306
95	577
96	855
97	894
98	904
99	1064
100	1972
101	798
102	1698
103	1709
104	2032
105	385
106	1252
107	1429
108	1043
109	1423
110	1176
111	672
112	1637
113	637
114	1268
115	626
116	1685
117	1808
118	1788
119	467
120	1442
121	1398
122	648
123	1304
124	827
125	1199
126	1014
127	1413
128	1107
129	1679
130	1259
131	1264
132	1914
133	625
134	1361
135	1949
136	1561
137	1377
138	731
139	1350
140	1202
141	1732
142	2648
143	1721
144	834
145	2094
146	1229
147	1923
148	1033
149	1011
150	1377
151	835
152	511
153	1371
154	1747
155	679
156	1144
157	915
158	1223
159	1374
160	1573
161	2732
162	1625
163	1400
164	1753
165	1446
166	635
167	1139
168	1664
169	1923
170	2614
171	1062
172	1551
173	903
174	2497
175	1509
176	3460
177	1208
178	1760
179	1619
180	2336
181	1366
182	476
183	1051
184	3187
185	1437
186	1156
187	1571
188	1460
189	1169
190	1679
191	802
192	1300
193	2066
194	880
195	991
196	2152
197	1664
198	1254
199	831
200	502
201	2073
202	805
203	1042
204	1636
205	487
206	1201
207	1683
208	2204
209	1120
210	1540
211	1218
212	1173
213	1663
214	2915
215	602
216	1180
217	1900
218	2388
219	964
220	1193
221	1946
222	597
223	1034
224	1358
225	681
226	1748
227	2805
228	2975
229	580
230	1492
231	3070
232	1307
233	1548
234	917
235	2599
236	999
237	1768
238	2042
239	1748
240	1535
241	2483
242	594
243	483
244	1671
[truncated: 495 more rows]

## Sheet: Expt3_060915
Muscle Cre-Mib1f/f			Expt 3
30d chase after tmx
Injury & 14d regeneration
Cross Sectional Area of Injured Fibers
	Area
1	1943
2	1728
3	502
4	75
5	231
6	1516
7	182
8	55
9	96
10	1483
11	188
12	1481
13	262
14	1123
15	1072
16	2441
17	550
18	594
19	216
20	316
21	1208
22	1385
23	1200
24	162
25	898
26	1306
27	930
28	519
29	1164
30	134
31	214
32	112
33	139
34	153
35	96
36	1321
37	537
38	974
39	2112
40	1870
41	2152
42	177
43	1618
44	2194
45	800
46	1178
47	1654
48	174
49	641
50	1359
51	988
52	1151
53	852
54	395
55	1327
56	1488
57	973
58	254
59	1303
60	1443
61	1261
62	1062
63	2522
64	1565
65	3957
66	775
67	1495
68	1522
69	266
70	1615
71	61
72	621
73	142
74	138
75	205
76	276
77	218
78	111
79	77
80	155
81	120
82	79
83	871
84	1243
85	988
86	732
87	2164
88	139
89	53
90	166
91	54
92	40
93	73
94	285
95	61
96	53
97	1442
98	131
99	1038
100	503
101	93
102	127
103	1347
104	1800
105	221
106	181
107	190
108	79
109	109
110	47
111	53
112	88
113	93
114	857
115	75
116	62
117	86
118	97
119	119
120	384
121	91
122	82
123	973
124	2094
125	250
126	920
127	1731
128	84
129	105
130	287
131	87
132	960
133	1067
134	2366
135	1003
136	1374
137	111
138	215
139	910
140	1701
141	515
142	1742
143	2044
144	1323
145	2151
146	454
147	143
148	1960
149	102
150	197
151	57
152	1185
153	189
154	394
155	184
156	487
157	259
158	272
159	844
160	1216
161	2469
162	2248
163	832
164	127
165	114
166	2035
167	1445
168	2086
169	1443
170	257
171	703
172	1029
173	94
174	243
175	129
176	76
177	144
178	379
179	647
180	71
181	334
182	214
183	133
184	416
185	641
186	1480
187	1445
188	1163
189	1715
190	1887
191	963
192	1911
193	488
194	321
195	1310
196	1322
197	547
198	754
199	685
200	252
201	1445
202	1409
203	693
204	822
205	1215
206	903
207	112
208	144
209	454
210	1058
211	562
212	137
213	89
214	155
215	79
216	458
217	232
218	1368
219	1350
220	258
221	522
222	402
223	661
224	102
225	313
226	849
227	2028
228	699
229	1325
230	966
231	299
232	187
233	249
234	122
235	155
236	2399
237	1645
238	1360
239	103
240	1978
241	592
242	816
243	877
244	719
245	50
246	89
247	52
248	74
249	122
250	211
251	338
252	161
253	117
254	1716
255	422
256	98
257	145
258	532
259	113
260	57
261	506
262	76
263	624
264	66
265	1122
266	472
267	1099
268	173
269	139
270	57
271	866
272	771
273	771
274	95
275	90
276	226
277	1902
278	23
279	53
280	603
281	394
282	1666
283	1064
284	549
285	1444
286	1096
287	580
288	512
289	88
290	172
291	212
292	1023
293	630
294	346
295	882
296	194
297	94
298	576
299	661
300	953
301	1691
302	195
303	107
304	610
305	275
306	93
307	79
308	123
309	43
310	1107
311	652
312	55
313	87
314	115
315	161
316	104
317	482
318	925
319	638
320	2079
321	113
322	578
323	614
324	1640
325	321
326	744
327	967
328	197
329	140
330	888
331	2101
332	640
333	679
334	1401
335	1270
336	118
337	625
338	297
339	626
340	1685
341	718
342	159
343	760
344	327
345	456
346	270
347	86
348	75
349	1079
350	74
351	41
352	184
353	356
354	85
355	132
356	547
357	66
358	2627
359	30
360	733
361	1086
362	2947
363	208
364	2395
365	255
366	1522
367	1999
368	307
369	1946
370	1356
371	243
372	1496
373	576
374	1329
375	136
376	1142
377	183
378	484
379	243
380	732
381	96
382	614
383	196
384	875
385	153
386	648
387	81
388	71
389	45
390	119
391	108
392	106
393	678
394	280
395	816
396	62
397	157
398	332
399	613
400	759
401	128
402	554
403	80
404	472
405	512
406	395
407	330
408	781
409	26
410	392
411	334
412	69
413	707
414	353
415	63
416	132
417	300
418	80
419	169
420	1195
421	168
422	87
423	52
424	130
425	820
426	455
427	113
428	588
429	60
430	51
431	36
432	1460
433	603
434	454
435	405
436	53
437	157
438	719
439	343
440	396
441	130
442	175
443	183
444	776
445	123
446	213
447	1897
448	520
449	77
450	113
451	140
452	624
453	750
454	1704
455	157
456	797
457	86
458	283
459	271
460	791
461	1769
462	1801
463	1181
464	640
465	444
466	1043
467	371
468	710
469	714
470	815
471	80
472	561
473	158
474	297
475	688
476	960
477	109
478	530
479	1066
480	1197
481	202
482	215
483	653
484	695
485	1659
486	1164
487	723
488	621
489	486
490	1201
491	852
492	132
493	229
494	165
495	79
496	254
497	395
498	273
499	94
500	72
501	135
502	681
503	1644
504	572
505	41
506	44
507	381
508	561
509	794
510	90
511	95
512	62
513	51
514	1245
515	690
516	235
517	367
518	346
519	46
520	61
521	317
522	856
523	785
524	1225
525	122
526	41
527	1129
528	793
529	49
530	197
531	612
532	1742
533	1080
534	184
535	376
536	194
537	178
538	663
539	595
540	545
541	125
542	70
543	360
544	61
545	330
546	253
547	44
548	63
549	84
550	95
551	78
552	490
553	340
554	53
555	49
556	221
557	536
558	76
559	543
560	122
561	560
562	897
563	1204
564	1742
565	109
566	661
567	402
568	131
569	104
570	206
571	419
572	594
573	817
574	714
575	173
576	1477
577	390
578	251
579	509
580	519
581	202
582	135
583	718
584	98
585	300
586	211
587	523
588	696
589	81
590	546
591	464
592	619
593	2630
594	691
595	35
596	21
597	55
598	106
599	338
600	360
601	344
602	627
603	18
604	1742
605	619
606	444
607	542
608	155
609	340
610	74
611	98
612	956
613	173
614	379
615	172
616	105
617	622
618	85
619	1487
620	57
621	135
622	992
623	597
624	111
625	440
626	120
627	1428
628	170
629	93
630	667
631	138
632	121
633	573
634	1609
635	850
636	427
637	588
638	669
639	762
640	702
641	608
642	1039
643	807
644	1143
645	162
646	577
647	495
648	202
649	50
650	51
651	75
652	150
653	59
654	235
655	190
656	125
657	641
658	101
659	105
660	67
661	231
662	87
663	185
664	489
665	281
666	115
667	144
668	63
669	181
670	429
671	80
672	356
673	121
674	375
675	210
676	58
677	292
678	183
679	74
680	435
681	330
682	180
683	288
684	95
685	140
686	324
687	666
688	53
689	59
690	293
691	270
692	1552
693	612
694	373
695	330
696	223
697	186
698	368
699	192
700	215
701	265
702	195
703	196
704	168
705	196
706	280
707	365
708	136
709	502
710	163
711	1303
712	738
713	1387
714	106
715	283
716	50
717	494
718	872
719	763
720	141
721	515
722	259
723	156
724	777
725	467
726	523
727	234
728	618
729	396
730	647
731	599
732	29
733	247
734	125
735	256
736	312
737	384
738	125
739	943
740	502
741	262
742	119
743	138
744	1087
745	434
746	472
747	171
748	166
749	158
750	350
751	174
752	45
753	653
754	120
755	125
756	1178
757	1467
758	297
759	347
760	504
761	455
762	963
763	52
764	967
765	820
766	81
767	33
768	240
769	105
770	55
771	15
772	123
773	165
774	415
775	1295
776	253
777	221
778	108
779	67
780	136
781	1016
782	767
783	234
784	257
785	1183
786	872
787	114
788	39
789	687
790	76
791	121
792	204
793	122
794	1249
795	153
796	238
797	54
798	301
799	122
800	472
801	628
802	88
803	255
804	63
805	398
806	284
807	589
808	99
809	160
810	73
811	102
812	632
813	252
814	468
815	269
816	290
817	1128
818	145
819	93
820	361
821	1017
822	123
823	52
824	833
825	540
826	835
827	623
828	101
829	56
830	311
831	250
832	395
833	173
834	300
835	644
836	179
837	190
838	150
839	181
840	334
841	274
842	128
843	161
844	480
845	193
846	651
847	102
848	54
849	408
850	39
851	771
852	168
853	245
854	172
855	927
856	644
857	825
858	118
859	1159
860	993
861	1087
862	755
863	591
864	243
865	102
866	103
867	167
868	465
869	572
870	1697
871	489
872	374
873	147
874	42
875	64
876	278
877	1205
878	77
879	724
880	832
881	259
882	448
883	825
884	78
885	68
886	653
887	1158
888	1075
889	882
890	1924
891	67
892	112
893	57
894	68
895	116
896	94
897	72
898	507
899	55
900	194
901	321
902	338
903	122
904	136
905	87
906	313
907	47
908	822
909	1539
910	298
911	112
912	655
913	68
914	608
915	1022
916	70
917	1382
918	2178
919	600
920	816
921	653
922	1547
923	276
924	624
925	90
926	1211
927	2359
928	269
929	291
930	1269
931	1105
932	178
933	110
934	874
935	136
936	70
937	59
938	2069
939	356
940	82
941	1922
942	770
943	366
944	783
945	1661
946	958
947	1428
948	1697
949	1536
950	2327
951	2016
952	48
953	1803
954	581
955	1005
956	919
957	1286
958	337
959	799
960	1110
961	2554
962	126
963	46
964	19
965	409
966	475
967	931
968	844
969	1693
970	413
971	78
972	1624
973	323
974	513
975	299
976	324
977	624
978	455
979	1183
980	3259
981	1130
982	3318
983	1521
984	875
985	403
986	390
987	402
988	717
989	1469
990	1731
991	1479
992	237
993	2566
994	986
995	1526
996	1551
997	296
998	1639
999	428
1000	510
1001	132
1002	189
1003	461
1004	413
1005	2335
1006	319
1007	361
1008	77
1009	685
1010	608
1011	123
1012	779
1013	1381
1014	2343
1015	217
1016	135
1017	1554
1018	1537
1019	1436
1020	662
1021	1429
1022	577
1023	162
1024	123
1025	155
1026	98
1027	311
1028	57
1029	1089
1030	1757
1031	104
1032	1242
1033	101
1034	241
1035	1336
1036	291
1037	1781
1038	1746
1039	674
1040	1297
1041	1205
1042	491
1043	42
1044	60
1045	994
1046	485
1047	996
1048	827
1049	1542
1050	82
1051	168
1052	229
1053	756
1054	172
1055	493
1056	258
1057	223
1058	1077
1059	156
1060	275
1061	281
1062	640
1063	1033
1064	612
1065	1733
1066	2192
1067	792
1068	1576
1069	1466
1070	363
1071	739
1072	1854
1073	1012
1074	95
1075	641
1076	316
1077	109
1078	71
1079	289
1080	1156
1081	105
1082	912
1083	1626
1084	341
1085	254
1086	198
1087	67
1088	569
1089	358
1090	60
1091	70
1092	531
1093	64
1094	74
1095	158
1096	49
1097	26
1098	58
1099	49
1100	1453
1101	90
1102	273
1103	338
1104	493
1105	82
1106	1623
1107	73
1108	273
1109	158
1110	961
1111	60
1112	210
1113	461
1114	393
1115	365
1116	443
1117	353
1118	320
1119	448
1120	347
1121	87
1122	133
1123	20
1124	44
1125	161
1126	441
1127	249
1128	49
1129	79
1130	666
1131	576
1132	1546
1133	534
1134	556
1135	103
1136	613
1137	84
1138	84
1139	287
1140	181
1141	170
1142	94
1143	880
1144	149
1145	58
1146	44
1147	117
1148	75
1149	1197
1150	121
1151	450
1152	967
1153	48
1	1420
2	2547
3	1141
4	326
5	2016
6	2202
7	538
8	3546
9	2346
10	1820
11	1590
12	143
13	839
14	1085
15	877
16	1876
17	1180
18	50
19	1101
20	699
21	2010
22	183
23	305
24	1719
25	828
26	128
27	461
28	184
29	417
30	525
31	157
32	104
33	97
34	175
35	719
36	110
37	414
38	1450
39	107
40	43
41	342
42	155
43	806
44	274
45	1405
46	554
47	177
48	1621
49	836
50	292
51	157
52	1154
53	109
54	260
55	409
56	507
57	119
58	199
59	197
60	331
61	471
62	538
63	190
64	307
65	395
66	466
67	740
68	56
69	90
70	63
71	58
72	441
73	1343
74	127
75	2052
76	221
77	1721
78	1506
79	1766
80	1921
81	975
82	803
83	112
84	156
85	337
86	45
87	168
88	493
89	169
90	79
91	970
92	404
93	429
94	226
95	440
96	599
97	125
98	169
99	318
100	584
101	1329
102	224
103	79
104	180
105	96
106	956
107	233
108	257
109	1387
110	216
111	2478
112	2683
113	1529
114	822
115	1273
116	180
117	123
118	103
119	690
120	636
121	1266
122	1828
123	916
124	1162
125	363
126	324
127	1025
128	69
129	671
130	607
131	1570
132	50
133	1476
134	99
135	168
136	329
137	63
138	330
139	261
140	219
141	29
142	155
143	66
144	582
145	2308
146	1551
147	2062
148	1539
149	2302
150	1445
151	394
152	239
153	93
154	61
155	1148
156	406
157	361
158	1247
159	1060
160	51
161	95
162	213
163	163
164	1082
165	1355
166	884
167	1030
168	89
169	519
170	470
171	318
172	81
173	195
174	594
175	2057
176	116
177	1399
178	1158
179	791
180	1252
181	105
182	187
183	321
184	73
185	781
186	733
187	651
188	422
189	224
190	1225
191	318
192	170
193	161
194	676
195	622
196	495
197	891
198	112
199	63
200	81
201	2043
202	406
203	436
204	183
205	371
206	1044
207	160
208	262
209	776
210	349
211	474
212	675
213	472
214	239
215	174
216	164
217	333
218	189
219	398
220	795
221	63
222	1536
223	1667
224	412
225	30
226	218
227	375
228	147
229	67
230	793
231	969
232	495
233	1007
234	414
235	833
236	275
1	911
2	374
3	1262
4	315
5	422
6	227
7	736
8	798
9	677
10	120
11	1001
12	414
13	949
14	117
15	398
16	150
17	72
18	77
19	390
20	1437
21	1818
22	910
23	730
24	263
25	823
26	1511
27	796
28	715
29	662
30	711
31	1250
32	1053
33	260
34	697
35	108
36	1229
37	683
38	1359
39	466
40	1323
41	1627
42	316
43	256
44	1610
45	1074
46	929
47	787
48	1334
49	993
50	650
51	1320
52	147
53	824
54	1390
55	379
56	2123
57	447
58	1303
59	1519
60	764
61	2148
62	141
63	1022
64	559
65	363
66	664
67	750
68	966
69	1237
70	731
71	1521
72	393
73	564
74	564
75	780
76	803
77	509
78	163
79	1326
80	850
81	344
82	231
83	368
84	569
85	312
86	137
87	415
88	194
89	709
90	340
91	743
92	1077
93	1047
94	1722
95	173
96	897
97	3182
98	90
99	297
100	757
101	236
102	1361
103	247
104	897
105	459
106	1152
107	801
108	167
109	109
110	1537
111	74
112	176
113	531
114	263
115	279
116	148
117	93
118	65
119	94
120	111
121	177
122	154
123	692
124	160
125	331
126	1753
127	447
128	1623
129	1326
130	624
131	854
132	1452
133	1196
134	1357
135	1273
136	1227
137	662
138	234
139	667
140	954
141	469
142	889
143	614
144	1506
145	661
146	338
147	912
148	933
149	720
150	479
151	1397
152	541
153	1024
154	619
155	651
156	920
157	843
158	883
159	1820
160	870
161	755
162	312
163	207
164	551
165	1646
166	1036
167	105
168	529
169	2577
170	521
171	1464
172	1541
173	1215
174	109
175	753
176	1256
177	223
178	470
179	2641
180	174
181	1311
182	1311
183	1752
184	180
185	173
186	989
187	475
188	983
189	132
190	1147
191	1928
192	438
193	2451
194	1196
195	1470
196	233
197	525
198	123
199	84
200	1541
201	1479
202	185
203	597
204	1308
205	690
206	209
207	1546
208	653
209	1968
210	1824
211	617
212	166
213	80
214	240
215	84
216	1517
217	1690
218	3394
219	276
220	882
221	439
222	367
223	1496
224	381
225	1914
226	196
227	1258
228	2375
229	2755
230	2611
231	782
232	172
233	95
234	885
235	1444
236	1136
237	1990
238	1846
239	257
240	286
241	136
242	1476
243	1433
244	2268
245	3105
246	2568
247	3549
248	3399
249	110
250	100
251	740
252	631
253	131
254	1934
255	2269
256	1946
257	1497
258	807
259	946
260	1896
261	2172
262	311
263	355
264	198
265	114
266	729
267	242
268	365
269	770
270	686
271	1210
272	927
273	1796
274	1058
275	904
276	954
277	1009
278	294
279	2844
280	1224
281	3515
282	1636
283	1719
284	262
285	1607
286	392
287	2947
288	1764
1	845
2	261
3	259
4	173
5	428
6	913
7	149
8	114
9	127
10	891
11	1645
12	444
13	814
14	1825
15	241
16	986
17	965
18	472
19	199
20	1712
21	655
22	1416
23	1224
24	199
25	262
26	504
27	411
28	402
29	330
30	171
31	1108
32	2028
33	142
34	122
35	117
36	1167
37	320
38	842
39	1333
40	555
41	709
42	362
43	303
44	788
45	715
46	107
47	208
48	131
49	959
50	87
51	165
52	180
53	826
54	1123
55	856
56	1340
57	228
58	1155
59	362
60	731
61	963
62	122
63	1156
64	1848
65	1433
66	111
67	502
68	1050
69	256
70	1545
71	376
72	382
73	123
74	512
75	277
76	2443
77	833
78	1460
79	597
80	534
81	892
82	242
83	155
84	768
85	153
86	2040
87	758
88	122
89	489
90	201
91	895
92	862
93	966
94	1289
95	962
96	229
97	343
98	207
99	454
100	463
101	1014
102	186
103	493
104	658
105	248
106	740
107	150
108	274
109	569
110	519
111	394
112	582
113	1297
114	587
115	744
116	790
117	1502
118	1599
119	126
120	73
121	326
122	174
123	1620
124	121
125	83
126	80
127	1595
128	1120
129	1947
130	1592
131	129
132	2080
133	185
134	579
135	279
136	212
137	140
138	215
139	1061
140	851
141	182
142	347
143	241
144	430
145	220
146	75
147	132
148	138
149	836
150	730
151	968
152	1916
153	534
154	831
155	392
156	559
157	1109
158	249
159	1426
160	906
161	262
162	1593
163	259
164	74
165	845
166	630
167	958
168	307
169	123
170	1087
171	660
172	874
173	2113
174	1657
175	1311
176	895
177	731
178	259
179	186
180	1664
181	1132
182	2064
183	1693
184	510
185	834
186	1887
187	411
188	1913
189	1353
190	502
191	544
192	1029
193	158
194	1006
195	161
196	1401
197	1600
198	826
199	106
200	412
201	809
202	382
203	859
204	697
205	2442
206	93
207	804
208	1450
209	1894
210	1004
211	243
212	333
213	1736
214	1663
215	1728
216	1863
217	1419
218	192
219	671
220	1454
221	1100
222	1161
223	1102
224	222
225	107
226	98
227	243
228	90
229	297
230	307
231	152
232	55
233	444
234	108
235	118
236	239
237	214
238	308
239	262
240	144
241	765
242	693
243	831
244	251
245	248
246	630
247	1667
248	1080
249	928
250	742
251	72
252	1110
253	398
254	460
255	664
256	879
257	177
258	1049
259	813
260	519
261	207
262	734
263	654
264	872
265	949
266	1262
267	962
268	1534
269	1156
270	737
271	325
272	893
273	586
274	376
275	818
276	144
277	1210
278	677
279	1674
280	645
281	1567
282	1477
283	900
284	435
285	1228
286	1018
287	591
288	632
289	512
290	453
291	1377
292	1352
293	649
294	1099
295	187
296	1300
297	727
298	1045
299	1415
300	142
301	451
302	306
303	175
304	105
305	769
306	264
307	1494
308	204
309	794
310	85
311	1828
312	1325
313	651
314	401
315	1195
316	833
317	875
318	1698
[truncated: 741 more rows]

## Sheet: Expt4_060915
Muscle Cre-Mib1f/f			Expt 4
30d chase after tmx
Injury & 14d regeneration
Cross Sectional Area of Injured Fibers
	Area
1	326
2	251
3	36
4	206
5	92
6	505
7	38
8	177
9	96
10	110
11	57
12	50
13	74
14	56
15	148
16	68
17	166
18	286
19	356
20	320
21	95
22	290
23	140
24	119
25	550
26	113
27	60
28	68
29	316
30	85
31	398
32	530
33	26
34	90
35	257
36	93
37	774
38	40
39	39
40	160
41	82
42	49
43	883
44	416
45	382
46	101
47	408
48	73
49	261
50	72
51	33
52	405
53	603
54	569
55	272
56	161
57	545
58	120
59	444
60	43
61	52
62	42
63	119
64	224
65	848
66	54
67	679
68	232
69	735
70	256
71	242
72	297
73	628
74	66
75	609
76	744
77	545
78	65
79	120
80	426
81	122
82	164
83	473
84	558
85	71
86	1161
87	247
88	415
89	82
90	495
91	62
92	230
93	159
94	154
95	207
96	296
97	90
98	516
99	144
100	217
101	363
102	261
103	74
104	442
105	2439
106	171
107	466
108	1055
109	229
110	76
111	165
112	636
113	3383
114	1179
115	590
116	992
117	1285
118	3701
119	1955
120	363
121	816
122	68
123	113
124	51
125	98
126	323
127	511
128	515
129	206
130	356
131	447
132	139
133	281
134	120
135	60
136	498
137	75
138	81
139	71
140	260
141	198
142	334
143	268
144	524
145	463
146	703
147	736
148	1822
149	1111
150	682
151	1501
152	543
153	3090
154	1628
155	2444
156	220
157	1083
158	1571
159	95
160	2465
161	1500
162	1857
163	35
164	170
165	349
166	132
167	468
168	233
169	250
170	98
171	834
172	1494
173	2216
174	77
175	368
176	63
177	1077
178	1308
179	124
180	222
181	254
182	223
183	415
184	141
185	911
186	224
187	134
188	196
189	131
190	143
191	117
192	468
193	56
194	1446
195	118
196	38
197	1054
198	128
199	262
200	605
201	277
202	294
203	356
204	1246
205	166
206	347
207	390
208	584
209	73
210	950
211	503
212	137
213	446
214	176
215	150
216	130
217	1412
218	286
219	101
220	29
221	151
222	356
223	104
224	24
225	63
226	114
227	244
228	33
229	137
230	342
231	135
232	360
233	96
234	377
235	348
236	265
237	108
238	279
239	461
240	166
241	77
242	171
243	856
244	474
245	335
246	409
247	245
248	72
249	581
250	312
251	463
252	424
253	60
254	1409
255	144
256	701
257	213
258	410
259	517
260	141
261	62
262	55
263	150
264	106
265	599
266	52
267	472
268	315
269	501
270	260
271	188
272	744
273	367
274	1622
275	913
276	229
277	785
278	118
279	182
280	508
281	606
282	61
283	595
284	508
285	70
286	858
287	169
288	55
289	76
290	41
291	101
292	186
293	245
294	279
295	448
296	1450
297	117
298	674
299	147
300	184
301	458
302	57
303	73
304	463
305	240
306	147
307	139
308	167
309	289
310	372
311	251
312	608
313	579
314	247
315	71
316	340
317	204
318	149
319	36
320	646
321	448
322	482
323	448
324	311
325	310
326	120
327	128
328	897
329	382
330	60
331	521
332	103
333	640
334	162
335	78
336	703
337	278
338	112
339	633
340	151
341	268
342	63
343	174
344	865
345	635
346	228
347	1442
348	559
349	642
350	781
351	4118
352	460
353	640
354	101
355	356
356	333
357	573
358	216
359	94
360	152
361	110
362	140
363	328
364	1675
365	1320
366	1867
367	538
368	1242
369	701
370	414
371	1732
372	2094
373	2425
374	38
375	1451
376	30
377	70
378	532
379	387
380	315
381	1650
382	1266
383	2554
384	867
385	873
386	1447
387	166
388	962
389	96
390	59
391	29
392	31
393	157
394	350
395	98
396	130
397	1006
398	14
399	32
400	2088
401	793
402	2311
403	34
404	2371
405	371
406	26
407	370
408	711
409	714
410	133
411	1046
412	825
413	2519
414	2313
415	924
416	788
417	63
418	121
419	630
420	159
421	16
422	160
423	199
424	1221
425	2973
426	287
427	203
428	1248
429	54
430	90
431	194
432	177
433	40
434	246
435	2222
436	2976
437	48
438	118
439	130
440	567
441	1912
442	251
443	543
444	412
445	665
446	42
447	603
448	1126
449	127
450	32
451	25
452	233
453	1717
454	124
455	1085
456	267
457	106
458	185
459	146
460	27
461	39
462	49
463	653
464	544
465	780
466	76
467	1715
468	1728
469	703
470	883
471	578
472	618
473	172
474	31
475	267
476	963
477	596
478	226
479	363
480	197
481	102
482	114
483	216
484	518
485	77
486	154
487	87
488	38
489	39
490	331
491	635
492	234
493	63
494	124
495	335
496	233
497	405
498	569
499	307
500	335
501	64
502	628
503	204
504	161
505	1611
506	2208
507	176
508	100
509	167
510	2850
511	1912
512	68
513	63
514	1559
515	59
516	79
517	70
518	3021
519	2769
520	1116
521	391
522	158
523	1530
524	55
525	374
526	58
527	118
528	1165
529	1877
530	1061
531	1652
532	57
533	779
534	501
535	2541
536	93
537	2260
538	94
539	67
540	266
541	82
542	89
543	201
544	115
545	171
546	2596
547	1976
548	691
549	1708
550	46
551	1953
552	568
553	1226
554	57
555	3146
556	2698
557	92
558	29
559	714
560	2604
561	93
562	70
563	223
564	670
565	2452
566	1692
567	2106
568	80
569	3023
570	178
571	1088
572	126
573	1990
574	755
575	745
576	1731
577	154
578	50
579	1612
580	81
581	1218
582	1129
583	61
584	1878
585	37
586	76
587	1174
588	1039
589	162
590	61
591	1423
592	397
593	2001
594	70
595	524
596	3623
597	3795
598	89
599	117
600	37
601	789
602	863
603	1309
604	1592
605	140
606	124
607	422
608	548
609	3445
610	199
611	2102
612	1071
613	1481
614	3308
615	4062
616	3191
617	1203
618	1633
619	1018
620	2175
621	306
622	169
623	125
624	88
625	3418
626	1932
627	57
628	1533
629	980
630	43
631	81
632	3085
633	1366
634	94
635	2084
636	1065
637	223
638	82
639	50
640	382
641	68
642	3038
643	1572
644	1622
645	2799
646	76
647	1256
648	31
649	1217
650	1685
651	753
652	1295
653	1359
654	1960
655	954
656	583
657	774
658	3165
659	61
660	40
661	958
662	1051
663	1270
664	49
665	42
666	35
667	791
668	92
669	60
670	22
671	33
672	141
673	480
674	1308
675	160
676	368
677	291
678	1238
679	68
680	258
681	124
682	35
683	46
684	43
685	316
686	248
687	77
688	79
689	543
690	104
691	45
692	100
693	79
694	118
695	62
696	319
697	283
698	55
699	318
700	65
701	995
702	30
703	667
704	57
705	913
706	248
707	1412
708	1278
709	2255
710	68
711	1456
712	687
713	1674
714	1532
715	34
716	49
717	103
718	33
719	1289
720	1480
721	321
722	231
723	144
724	1746
725	93
726	1335
727	1690
728	954
729	2446
730	77
731	71
732	663
733	1642
734	752
735	97
736	240
737	23
738	44
739	138
740	306
741	591
742	3903
743	3035
744	498
745	1115
746	2905
747	49
748	3325
749	274
750	2717
751	1972
752	85
753	91
754	493
755	1819
756	105
757	1014
758	1314
759	1059
760	2434
761	56
762	59
763	100
764	722
765	483
766	2738
767	54
768	1093
769	1221
770	880
771	1076
772	752
773	734
774	1864
775	3478
776	1703
777	71
778	145
779	919
780	117
781	268
782	317
783	76
784	76
785	71
786	125
787	1067
788	1281
789	3414
790	1403
791	3582
792	2025
793	1261
794	2597
795	2938
796	2352
797	2632
798	1770
799	3151
800	1903
801	4343
802	449
803	1726
804	545
805	3377
806	2640
807	522
808	2234
809	1516
810	3800
811	1712
812	270
813	741
814	3189
815	3322
816	2857
817	720
818	200
819	2380
820	1928
821	1600
822	1819
823	2465
824	2576
825	1557
826	1457
827	3251
828	1411
829	2252
830	1377
831	1576
832	1809
833	134
834	426
835	1104
836	2527
837	3211
838	2098
839	2933
840	1924
841	364
842	117
843	1012
844	343
845	105
846	2669
847	2961
848	1056
849	216
850	2052
851	89
852	71
853	1757
854	2527
855	575
856	2635
857	1161
858	378
859	275
860	2279
861	1202
862	961
863	3132
864	1880
865	2752
866	300
867	1301
868	11
869	131
870	1015
871	1964
872	1038
873	720
874	414
875	175
876	1886
877	3049
878	1620
879	409
880	2886
881	916
882	107
883	3036
884	1791
885	2791
886	117
887	3341
888	459
889	412
890	298
891	2243
892	222
893	151
894	1294
895	382
896	1387
897	79
898	101
899	944
900	232
901	131
902	90
903	2477
904	134
905	1679
906	120
907	1980
908	3118
909	2107
910	2526
911	1700
912	1064
913	297
914	1316
915	521
916	2549
917	1534
918	165
919	623
920	933
921	159
922	1589
923	80
924	175
925	217
926	105
927	304
928	150
929	4096
930	931
931	420
932	308
933	192
934	1414
935	101
936	1103
937	322
938	3703
939	2212
940	469
941	806
942	614
943	362
944	1035
945	335
946	325
947	133
948	932
949	313
950	1438
951	113
952	2696
953	248
954	387
955	2750
956	226
957	382
958	537
959	54
960	1017
961	119
962	1286
963	94
964	1238
965	1553
966	1617
967	2682
968	3219
969	63
970	55
971	292
972	2167
973	176
974	326
975	2770
976	795
977	1139
978	2042
979	306
980	1077
981	1086
982	810
983	1721
984	2333
985	1971
986	942
987	215
988	220
989	174
990	321
991	244
992	376
993	310
994	399
995	74
996	108
997	175
998	180
999	424
1000	178
1001	651
1002	321
1003	195
1004	198
1005	196
1006	462
1007	1012
1008	294
1009	285
1010	147
1011	203
1012	231
1013	761
1014	115
1015	2202
1016	55
1017	309
1018	401
1019	619
1020	236
1021	269
1022	687
1023	179
1024	247
1025	438
1026	57
1027	121
1028	280
1029	166
1030	329
1031	180
1032	142
1033	1056
1034	717
1035	175
1036	148
1037	491
1038	743
1039	1006
1040	715
1041	531
1042	101
1043	239
1044	407
1045	1130
1046	1998
1047	746
1048	147
1049	1965
1050	708
1051	1232
1052	478
1053	4147
1054	2113
1055	692
1056	1226
1057	2313
1058	2027
1059	5051
1060	4290
1061	1608
1062	1754
1063	1254
1064	1142
1065	1711
1066	211
1067	1209
1068	431
1069	1160
1070	149
1071	2231
1072	701
1073	1150
1074	3306
1075	698
1076	3120
1077	1838
1078	681
1079	138
1080	404
1081	1767
1082	276
1083	351
1084	2124
1085	279
1086	281
1087	549
1088	282
1089	347
1090	2006
1091	1804
1092	659
1093	255
1094	297
1095	1615
1096	538
1097	1151
1098	1753
1099	1874
1100	1764
1101	1816
1	3249
2	305
3	278
4	3697
5	114
6	619
7	549
8	1271
9	568
10	466
11	807
12	892
13	1377
14	1531
15	202
16	518
17	434
18	74
19	52
20	57
21	135
22	1552
23	304
24	63
25	102
26	172
27	582
28	49
29	452
30	176
31	937
32	2249
33	936
34	776
35	533
36	102
37	3935
38	1476
39	1044
40	504
41	391
42	249
43	143
44	107
45	1533
46	122
47	90
48	1562
49	277
50	935
51	86
52	1504
53	139
54	92
55	690
56	1152
57	88
58	112
59	801
60	2465
61	1170
62	1025
63	172
64	95
65	131
66	116
67	79
68	57
69	654
70	1146
71	2054
72	591
73	835
74	2182
75	119
76	137
77	88
78	79
79	54
80	102
81	95
82	55
83	45
84	247
85	1169
86	1376
87	72
88	147
89	1578
90	1545
91	1643
92	158
93	231
94	1614
95	189
96	255
97	1238
98	65
99	1442
100	614
101	2122
102	155
103	595
104	304
105	714
106	1879
107	1448
108	244
109	101
110	329
111	290
112	471
113	2229
114	362
115	1526
116	1109
117	597
118	1230
119	448
120	83
121	842
122	556
123	48
124	166
125	59
126	1016
127	1278
128	916
129	98
130	124
131	324
132	1643
133	178
134	194
135	166
136	90
137	1175
138	922
139	535
140	1385
141	164
142	333
143	149
144	566
145	896
146	143
147	1050
148	450
149	1496
150	82
151	255
152	1270
153	599
154	121
155	357
156	183
157	157
158	56
159	693
160	77
161	775
162	816
163	175
164	146
165	118
166	166
167	254
168	940
169	273
170	136
171	110
172	639
173	66
174	1149
175	107
176	95
177	794
178	428
179	157
180	267
181	94
182	403
183	332
184	556
185	46
186	223
187	1326
188	578
189	461
190	468
191	760
192	108
193	84
194	75
195	76
196	174
197	573
198	124
199	669
200	47
201	79
202	316
203	153
204	544
205	255
206	41
207	288
208	706
209	118
210	145
211	234
212	169
213	86
214	551
215	246
216	384
217	155
218	284
219	469
220	235
221	337
222	205
223	85
224	58
225	300
226	291
227	458
228	399
229	266
230	236
231	737
232	200
233	316
234	76
235	98
236	150
237	477
238	142
239	63
240	363
241	383
242	928
243	292
244	222
245	109
246	227
247	288
248	488
249	429
250	254
251	302
252	142
253	1027
254	907
255	735
256	161
257	299
258	267
259	263
260	185
261	235
262	85
263	276
264	118
265	515
266	230
267	195
268	42
269	43
270	99
271	98
272	311
273	127
274	142
275	149
276	401
277	176
278	319
279	409
280	256
281	325
282	109
283	133
284	177
285	239
286	396
287	100
288	262
289	109
290	247
291	115
292	225
293	52
294	104
295	191
296	261
297	117
298	74
299	124
300	172
301	148
302	684
303	759
304	135
305	58
306	70
307	865
308	160
309	194
310	817
311	77
312	262
313	114
314	88
315	662
316	462
317	384
318	341
319	550
320	1929
321	472
322	164
323	1024
324	555
325	242
326	1139
327	1091
328	654
329	121
330	63
331	452
332	781
333	87
334	415
335	358
336	812
337	272
338	278
339	296
340	84
341	28
342	88
343	402
344	394
345	278
346	373
347	217
348	229
349	224
350	681
351	575
352	214
353	217
354	275
355	282
356	148
357	1197
358	454
359	467
360	214
361	626
362	356
363	133
364	62
365	620
366	148
367	69
368	1210
369	1664
370	76
371	231
372	200
373	159
374	414
375	319
376	755
377	520
378	1282
379	478
380	61
381	1911
382	97
383	1561
384	908
385	108
386	2843
387	109
388	861
389	1613
390	1656
391	1165
392	34
393	747
394	2876
395	117
396	1584
397	63
398	660
399	186
400	1411
401	201
402	504
403	266
404	100
405	165
406	99
407	210
408	756
409	62
410	180
411	67
412	242
413	72
414	1027
415	1025
416	803
417	963
418	208
419	91
420	269
421	316
422	865
423	151
424	195
425	1204
426	1206
427	1790
428	1606
429	384
430	512
431	327
432	282
433	519
434	608
435	137
436	2708
437	1575
438	3544
439	519
440	1109
441	73
442	213
443	169
444	2506
445	455
446	357
447	93
448	183
449	97
1	74
2	449
3	60
4	39
5	235
6	764
7	1400
8	951
9	1067
10	106
11	108
12	1284
13	157
14	46
15	1079
16	127
17	86
18	1572
19	309
20	301
21	944
22	383
23	169
24	93
25	1081
26	113
27	2121
28	139
29	130
30	856
31	90
32	1470
33	592
34	687
35	542
36	376
37	978
38	99
39	100
40	106
41	111
42	592
43	819
44	1063
45	1537
46	195
47	1098
48	1417
49	2178
50	2089
51	1333
52	635
53	86
54	243
55	139
56	111
57	511
58	128
59	125
60	196
61	555
62	114
63	487
64	1570
65	106
66	924
67	98
68	324
69	1747
70	250
71	254
72	951
73	112
74	113
75	1115
76	1419
77	108
78	157
79	665
80	1134
81	1105
82	303
83	1563
84	472
85	515
86	1674
87	105
88	105
89	360
90	242
91	274
92	155
93	308
94	49
95	318
96	406
97	624
98	48
99	354
100	352
101	343
102	190
103	338
104	1901
105	1084
106	72
107	65
108	2794
109	137
110	605
111	136
112	99
113	1105
114	657
115	1461
116	1407
117	1116
118	1061
119	1076
120	723
121	1946
122	675
123	199
124	546
125	466
126	725
127	105
128	331
129	352
130	136
131	455
132	521
133	354
134	357
135	366
136	146
137	486
138	554
139	599
140	138
141	87
142	556
143	56
144	157
145	138
146	232
147	412
148	218
149	231
150	247
151	384
152	38
153	123
154	506
155	156
156	539
157	1165
158	788
159	197
160	323
161	459
162	464
163	46
164	64
165	135
166	370
167	565
168	112
169	92
170	619
171	638
172	285
173	436
174	799
175	108
176	82
177	589
178	171
179	333
180	1079
181	717
182	634
183	191
184	512
185	95
186	130
187	463
188	85
189	419
190	680
191	421
192	163
193	463
194	395
195	726
196	250
197	1308
198	737
199	55
200	144
201	78
202	630
203	531
204	508
205	727
206	97
207	143
208	142
209	345
210	157
211	45
212	344
213	174
214	387
215	779
216	373
217	148
218	1571
219	924
220	295
221	955
222	799
223	330
224	1158
225	143
226	994
227	1328
228	115
229	1843
230	1104
231	2926
232	294
233	1099
234	1012
235	2245
236	650
237	1615
238	218
239	578
240	221
241	465
242	75
243	33
244	1053
245	229
246	925
247	507
248	463
249	611
250	433
251	1135
252	232
253	513
254	151
255	38
256	35
257	93
258	345
259	174
260	1521
261	1009
262	281
263	174
264	105
265	1839
266	1641
267	1401
268	1077
269	300
270	669
271	1642
272	59
273	43
274	1122
275	1389
276	422
277	287
278	916
279	4323
280	533
281	1924
282	65
283	46
284	280
285	194
286	83
287	166
288	78
289	114
290	73
291	1213
292	364
293	126
294	540
295	106
296	192
297	98
298	324
299	173
300	155
301	1205
302	66
303	360
304	123
305	118
306	124
307	43
308	559
309	371
310	104
311	137
312	396
313	278
314	471
315	177
316	117
317	146
318	47
319	77
320	39
321	47
322	594
323	765
324	174
325	129
326	406
327	383
328	196
329	177
330	398
331	58
332	173
333	32
334	68
335	377
336	290
337	311
338	194
339	138
340	175
341	207
342	72
343	1168
344	174
345	332
346	259
347	109
348	288
349	273
350	65
351	1086
352	340
353	766
354	766
355	79
356	141
357	27
358	35
359	485
360	1066
361	352
362	1093
363	322
364	208
365	138
366	230
367	159
368	144
369	82
370	745
371	263
372	934
373	142
374	113
375	96
376	376
377	345
378	419
379	63
380	122
381	232
382	186
383	467
384	359
385	291
386	485
387	573
388	474
389	497
390	118
391	127
392	1284
393	671
394	271
395	706
396	122
397	476
398	93
399	997
400	661
401	131
402	1213
403	130
404	164
405	83
406	283
407	75
408	96
409	289
410	60
411	509
412	202
413	139
414	218
415	605
416	548
417	54
418	161
419	136
420	405
421	544
422	220
423	242
424	91
425	608
426	386
427	936
428	632
429	597
430	88
431	57
432	284
433	312
434	341
435	1116
436	291
437	68
438	967
439	188
440	86
441	88
442	498
443	131
444	191
445	412
[truncated: 2,953 more rows]
