# Supplementary material for: Heterogeneous levels of delta-like 4 within a multinucleated niche cell maintains muscle stem cell diversity
Source: eLife. 2022 Dec 30;11:e68180. doi: 10.7554/eLife.68180 (PMC9803355; doi:10.7554/eLife.68180)
Supplement: Figure 7—source data 6. [file elife-68180-fig7-data6.xlsx]

## Sheet: Ctrl2_060915
Mib1f/f	Ctrl 2	060915
Injury and Regeneration	14 dpi
Section	Area of injured tissue	# of Pax7+ cells in injured tissue	# of Pax7+ SCs/mm2 injured tissue	Avg # of Pax7+ SCs/mm2 injured tissue
S1-1	0.73	79
2	0.66	53
3	1.3	105
4	1.59	109
	4.28	346	80.8411	76.9676
S2-1	0.71	65
2	0.87	70
3	1.38	81
4	1.5	110
	4.46	326	73.0942

## Sheet: Expt3_060915
mCre-Mib1f/f	Expt 3	060915
Injury and Regeneration	14 dpi
Section	Area of injured tissue	# of Pax7+ cells in injured tissue	# of Pax7+ SCs/mm2 injured tissue	Avg # of Pax7+ SCs/mm2 injured tissue
S1-1	0.56	47
2	0.98	65
3	0.54	31
4	1.39	79
5	1.25	78
	4.72	300	63.5593	62.0549
S2-1	0.44	26
2	0.66	48
3	0.47	29
4	1.39	83
5	1.4	78
	4.36	264	60.5505

## Sheet: Expt4_060915
mCre-Mib1f/f	Expt 4	060916
Injury and Regeneration	14 dpi
Section	Area of injured tissue	# of Pax7+ cells in injured tissue	# of Pax7+ SCs/mm2 injured tissue	Avg # of Pax7+ SCs/mm2 injured tissue
S1-1	0.45	34
2	0.48	30
3	1.08	119
4	0.66	30
5	0.28	37
6	1.9	161
7	1.37	68
	6.22	479	77.0096	72.8539
S2-1	1.43	68
2	1.96	134
3	0.82	43
4	0.81	58
5	0.17	7
6	1.26	123
7	0.77	63
	7.22	496	68.6981

## Sheet: Expt5_060915
mCre-Mib1f/f	Expt 5	060915
Injury and Regeneration	14 dpi
Section	Area of injured tissue	# of Pax7+ cells in injured tissue	# of Pax7+ SCs/mm2 injured tissue	Avg # of Pax7+ SCs/mm2 injured tissue
S1-1	1.69	98
2	1.44	85
3	0.6	45
4	0.55	20
5	1.02	98
	5.3	346	65.283	66.2115
S2-1	1.63	101
2	1.13	74
3	0.88	80
4	0.9	56
5	0.39	20
	4.93	331	67.14

## Sheet: Ctrl3_050220
Mib1f/f	Ctrl 3	50220
Injury and Regeneration	14 dpi
Section	Area of injured tissue	# of Pax7+ cells in injured tissue	# of Pax7+ SCs/mm2 injured tissue	Avg # of Pax7+ SCs/mm2 injured tissue
S1-1	1.28	96
2	1.12	92
3	0.48	44
4	0.84	88
5	1.42	102
6	1.08	118
	6.22	540	86.8167	88.1563
S2-1	1.44	121
2	0.31	26
3	0.96	82
4	1.13	96
5	0.92	101
	4.76	426	89.4958

## Sheet: Ctrl6_050220
Mib1f/f	Ctrl 6	50220
Injury and Regeneration	14 dpi
Section	Area of injured tissue	# of Pax7+ cells in injured tissue	# of Pax7+ SCs/mm2 injured tissue	Avg # of Pax7+ SCs/mm2 injured tissue
S1-1	1.16	56
2	0.93	76
3	1.41	142
4	1.27	62
5	1.22	183
6	0.92	106
	6.91	625	90.4486	87.494
S2-1	1.82	183
2	0.67	36
3	1.02	88
4	0.22	10
5	1.45	101
6	0.9	96
	6.08	514	84.5395

## Sheet: Ctrl3_092020
Mib1f/f	Ctrl 3_male_092020
Injury and Regeneration	14 dpi
Section	Area of injured tissue	# of Pax7+ cells in injured tissue	# of Pax7+ SCs/mm2 injured tissue	Avg # of Pax7+ SCs/mm2 injured tissue
S1-1	1.31	129
2	1.62	109
3	0.41	36
4	0.69	38
5	0.65	48
	4.68	360	76.9231	73.1282
S2-1	1.21	90
2	0.99	52
3	0.6	48
4	1.79	105
5	1.41	121
	6	416	69.3333

## Sheet: Ctrl6_092020
Mib1f/f	Ctrl 6_male_092020
Injury and Regeneration	14 dpi
Section	Area of injured tissue	# of Pax7+ cells in injured tissue	# of Pax7+ SCs/mm2 injured tissue	Avg # of Pax7+ SCs/mm2 injured tissue
S1-1	1.38	115
2	1.64	112
3	0.17	9
4	1.82	112
5	1.4	103
6	0.24	15
	6.65	466	70.0752	73.0507
S2-1	1.41	139
2	1.53	99
3	0.27	16
4	1.43	102
5	1.45	107
	6.09	463	76.0263

## Sheet: Expt1_092020
mCre-Mib1f/f	Expt 1_male_092020
Injury and Regeneration	14 dpi
Section	Area of injured tissue	# of Pax7+ cells in injured tissue	# of Pax7+ SCs/mm2 injured tissue	Avg # of Pax7+ SCs/mm2 injured tissue
S1-1	1.22	146
2	1.77	170
3	0.2	19
4	1.4	147
5	1.31	87
6	0.9	64
	6.8	633	93.0882	90.332
S2-1	0.95	119
2	1.82	158
3	1.25	76
4	0.99	67
5	1.59	158
	6.6	578	87.5758

## Sheet: Expt8_092020
mCre-Mib1f/f	Expt 8_male_092020
Injury and Regeneration	14 dpi
Section	Area of injured tissue	# of Pax7+ cells in injured tissue	# of Pax7+ SCs/mm2 injured tissue	Avg # of Pax7+ SCs/mm2 injured tissue
S1-1	1.46	128
2	1.44	136
3	0.42	47
4	1.25	115
5	1.75	128
	6.32	554	87.6582	91.2359
S2-1	1.52	127
2	0.7	48
3	0.82	81
4	1.9	188
5	1.23	141
	6.17	585	94.8136
